# Supplementary material
Source: ML conference proceedings conference paper supplement (https://proceedings.neurips.cc/paper_files/paper/2022/hash/5afaa8b4dd18eb1eed055d2d821b58ae-Abstract.html)
Supplement: Supplementary file 1 [file 5afaa8b4dd18eb1eed055d2d821b58ae-Supplemental-Conference.zip]

Archive with 1,270 entries (1,151 files):
- 6769_exploring_the_whole_rashomon_s-Supplementary Material/
- 6769_exploring_the_whole_rashomon_s-Supplementary Material/.DS_Store
- __MACOSX/
- __MACOSX/6769_exploring_the_whole_rashomon_s-Supplementary Material/
- __MACOSX/6769_exploring_the_whole_rashomon_s-Supplementary Material/._.DS_Store
- 6769_exploring_the_whole_rashomon_s-Supplementary Material/6769_appendix.pdf
- __MACOSX/6769_exploring_the_whole_rashomon_s-Supplementary Material/._6769_appendix.pdf
- 6769_exploring_the_whole_rashomon_s-Supplementary Material/6769_code_repo/
- 6769_exploring_the_whole_rashomon_s-Supplementary Material/6769_code_repo/configure.ac
- __MACOSX/6769_exploring_the_whole_rashomon_s-Supplementary Material/6769_code_repo/
- __MACOSX/6769_exploring_the_whole_rashomon_s-Supplementary Material/6769_code_repo/._configure.ac
- 6769_exploring_the_whole_rashomon_s-Supplementary Material/6769_code_repo/test/
- 6769_exploring_the_whole_rashomon_s-Supplementary Material/6769_code_repo/test/test_trie.hpp
- __MACOSX/6769_exploring_the_whole_rashomon_s-Supplementary Material/6769_code_repo/test/
- __MACOSX/6769_exploring_the_whole_rashomon_s-Supplementary Material/6769_code_repo/test/._test_trie.hpp
- 6769_exploring_the_whole_rashomon_s-Supplementary Material/6769_code_repo/test/test_bitmask.hpp
- __MACOSX/6769_exploring_the_whole_rashomon_s-Supplementary Material/6769_code_repo/test/._test_bitmask.hpp
- 6769_exploring_the_whole_rashomon_s-Supplementary Material/6769_code_repo/test/test.cpp
- __MACOSX/6769_exploring_the_whole_rashomon_s-Supplementary Material/6769_code_repo/test/._test.cpp
- 6769_exploring_the_whole_rashomon_s-Supplementary Material/6769_code_repo/test/test_consistency.hpp
- __MACOSX/6769_exploring_the_whole_rashomon_s-Supplementary Material/6769_code_repo/test/._test_consistency.hpp
- 6769_exploring_the_whole_rashomon_s-Supplementary Material/6769_code_repo/test/test.hpp
- __MACOSX/6769_exploring_the_whole_rashomon_s-Supplementary Material/6769_code_repo/test/._test.hpp
- 6769_exploring_the_whole_rashomon_s-Supplementary Material/6769_code_repo/test/test_index.hpp
- __MACOSX/6769_exploring_the_whole_rashomon_s-Supplementary Material/6769_code_repo/test/._test_index.hpp
- 6769_exploring_the_whole_rashomon_s-Supplementary Material/6769_code_repo/test/fixtures/
- 6769_exploring_the_whole_rashomon_s-Supplementary Material/6769_code_repo/test/fixtures/binary_sepal.csv
- __MACOSX/6769_exploring_the_whole_rashomon_s-Supplementary Material/6769_code_repo/test/fixtures/
- __MACOSX/6769_exploring_the_whole_rashomon_s-Supplementary Material/6769_code_repo/test/fixtures/._binary_sepal.csv
- 6769_exploring_the_whole_rashomon_s-Supplementary Material/6769_code_repo/test/fixtures/sequences.csv
- __MACOSX/6769_exploring_the_whole_rashomon_s-Supplementary Material/6769_code_repo/test/fixtures/._sequences.csv
- 6769_exploring_the_whole_rashomon_s-Supplementary Material/6769_code_repo/test/fixtures/small.csv
- __MACOSX/6769_exploring_the_whole_rashomon_s-Supplementary Material/6769_code_repo/test/fixtures/._small.csv
- 6769_exploring_the_whole_rashomon_s-Supplementary Material/6769_code_repo/test/fixtures/binary_sepal.json
- __MACOSX/6769_exploring_the_whole_rashomon_s-Supplementary Material/6769_code_repo/test/fixtures/._binary_sepal.json
- 6769_exploring_the_whole_rashomon_s-Supplementary Material/6769_code_repo/test/fixtures/sepal.json
- __MACOSX/6769_exploring_the_whole_rashomon_s-Supplementary Material/6769_code_repo/test/fixtures/._sepal.json
- 6769_exploring_the_whole_rashomon_s-Supplementary Material/6769_code_repo/test/fixtures/sequences.json
- __MACOSX/6769_exploring_the_whole_rashomon_s-Supplementary Material/6769_code_repo/test/fixtures/._sequences.json
- 6769_exploring_the_whole_rashomon_s-Supplementary Material/6769_code_repo/test/fixtures/tree.csv
- __MACOSX/6769_exploring_the_whole_rashomon_s-Supplementary Material/6769_code_repo/test/fixtures/._tree.csv
- 6769_exploring_the_whole_rashomon_s-Supplementary Material/6769_code_repo/test/fixtures/sepal.csv
- __MACOSX/6769_exploring_the_whole_rashomon_s-Supplementary Material/6769_code_repo/test/fixtures/._sepal.csv
- 6769_exploring_the_whole_rashomon_s-Supplementary Material/6769_code_repo/test/fixtures/dataset.csv
- __MACOSX/6769_exploring_the_whole_rashomon_s-Supplementary Material/6769_code_repo/test/fixtures/._dataset.csv
- 6769_exploring_the_whole_rashomon_s-Supplementary Material/6769_code_repo/test/fixtures/tree.json
- __MACOSX/6769_exploring_the_whole_rashomon_s-Supplementary Material/6769_code_repo/test/fixtures/._tree.json
- 6769_exploring_the_whole_rashomon_s-Supplementary Material/6769_code_repo/test/fixtures/dataset.json
- __MACOSX/6769_exploring_the_whole_rashomon_s-Supplementary Material/6769_code_repo/test/fixtures/._dataset.json
- __MACOSX/6769_exploring_the_whole_rashomon_s-Supplementary Material/6769_code_repo/test/._fixtures
- 6769_exploring_the_whole_rashomon_s-Supplementary Material/6769_code_repo/test/test_queue.hpp
- __MACOSX/6769_exploring_the_whole_rashomon_s-Supplementary Material/6769_code_repo/test/._test_queue.hpp
- 6769_exploring_the_whole_rashomon_s-Supplementary Material/6769_code_repo/test/.dirstamp
- __MACOSX/6769_exploring_the_whole_rashomon_s-Supplementary Material/6769_code_repo/test/._.dirstamp
- __MACOSX/6769_exploring_the_whole_rashomon_s-Supplementary Material/6769_code_repo/._test
- 6769_exploring_the_whole_rashomon_s-Supplementary Material/6769_code_repo/configure
- __MACOSX/6769_exploring_the_whole_rashomon_s-Supplementary Material/6769_code_repo/._configure
- 6769_exploring_the_whole_rashomon_s-Supplementary Material/6769_code_repo/auto/
- 6769_exploring_the_whole_rashomon_s-Supplementary Material/6769_code_repo/auto/wiredtiger.sh
- __MACOSX/6769_exploring_the_whole_rashomon_s-Supplementary Material/6769_code_repo/auto/
- __MACOSX/6769_exploring_the_whole_rashomon_s-Supplementary Material/6769_code_repo/auto/._wiredtiger.sh
- 6769_exploring_the_whole_rashomon_s-Supplementary Material/6769_code_repo/auto/opencl.sh
- __MACOSX/6769_exploring_the_whole_rashomon_s-Supplementary Material/6769_code_repo/auto/._opencl.sh
- 6769_exploring_the_whole_rashomon_s-Supplementary Material/6769_code_repo/auto/tbb.sh
- __MACOSX/6769_exploring_the_whole_rashomon_s-Supplementary Material/6769_code_repo/auto/._tbb.sh
- 6769_exploring_the_whole_rashomon_s-Supplementary Material/6769_code_repo/auto/acx_pthread.m4
- __MACOSX/6769_exploring_the_whole_rashomon_s-Supplementary Material/6769_code_repo/auto/._acx_pthread.m4
- 6769_exploring_the_whole_rashomon_s-Supplementary Material/6769_code_repo/auto/ax_check_cl.m4
- __MACOSX/6769_exploring_the_whole_rashomon_s-Supplementary Material/6769_code_repo/auto/._ax_check_cl.m4
- 6769_exploring_the_whole_rashomon_s-Supplementary Material/6769_code_repo/auto/gmp.sh
- __MACOSX/6769_exploring_the_whole_rashomon_s-Supplementary Material/6769_code_repo/auto/._gmp.sh
- 6769_exploring_the_whole_rashomon_s-Supplementary Material/6769_code_repo/auto/ax_cxx_compile_stdcxx.m4
- __MACOSX/6769_exploring_the_whole_rashomon_s-Supplementary Material/6769_code_repo/auto/._ax_cxx_compile_stdcxx.m4
- 6769_exploring_the_whole_rashomon_s-Supplementary Material/6769_code_repo/auto/boost.sh
- __MACOSX/6769_exploring_the_whole_rashomon_s-Supplementary Material/6769_code_repo/auto/._boost.sh
- 6769_exploring_the_whole_rashomon_s-Supplementary Material/6769_code_repo/auto/boost.m4
- __MACOSX/6769_exploring_the_whole_rashomon_s-Supplementary Material/6769_code_repo/auto/._boost.m4
- __MACOSX/6769_exploring_the_whole_rashomon_s-Supplementary Material/6769_code_repo/._auto
- 6769_exploring_the_whole_rashomon_s-Supplementary Material/6769_code_repo/config.json
- __MACOSX/6769_exploring_the_whole_rashomon_s-Supplementary Material/6769_code_repo/._config.json
- 6769_exploring_the_whole_rashomon_s-Supplementary Material/6769_code_repo/experiments/
- 6769_exploring_the_whole_rashomon_s-Supplementary Material/6769_code_repo/experiments/datasets/
- 6769_exploring_the_whole_rashomon_s-Supplementary Material/6769_code_repo/experiments/datasets/vote/
- 6769_exploring_the_whole_rashomon_s-Supplementary Material/6769_code_repo/experiments/datasets/vote/data_binary.csv
- __MACOSX/6769_exploring_the_whole_rashomon_s-Supplementary Material/6769_code_repo/experiments/
- __MACOSX/6769_exploring_the_whole_rashomon_s-Supplementary Material/6769_code_repo/experiments/datasets/
- __MACOSX/6769_exploring_the_whole_rashomon_s-Supplementary Material/6769_code_repo/experiments/datasets/vote/
- __MACOSX/6769_exploring_the_whole_rashomon_s-Supplementary Material/6769_code_repo/experiments/datasets/vote/._data_binary.csv
- __MACOSX/6769_exploring_the_whole_rashomon_s-Supplementary Material/6769_code_repo/experiments/datasets/._vote
- 6769_exploring_the_whole_rashomon_s-Supplementary Material/6769_code_repo/experiments/datasets/compas/
- 6769_exploring_the_whole_rashomon_s-Supplementary Material/6769_code_repo/experiments/datasets/compas/binned.csv
- __MACOSX/6769_exploring_the_whole_rashomon_s-Supplementary Material/6769_code_repo/experiments/datasets/compas/
- __MACOSX/6769_exploring_the_whole_rashomon_s-Supplementary Material/6769_code_repo/experiments/datasets/compas/._binned.csv
- __MACOSX/6769_exploring_the_whole_rashomon_s-Supplementary Material/6769_code_repo/experiments/datasets/._compas
- 6769_exploring_the_whole_rashomon_s-Supplementary Material/6769_code_repo/experiments/datasets/.DS_Store
- __MACOSX/6769_exploring_the_whole_rashomon_s-Supplementary Material/6769_code_repo/experiments/datasets/._.DS_Store
- 6769_exploring_the_whole_rashomon_s-Supplementary Material/6769_code_repo/experiments/datasets/iris/
- 6769_exploring_the_whole_rashomon_s-Supplementary Material/6769_code_repo/experiments/datasets/iris/data.csv
- __MACOSX/6769_exploring_the_whole_rashomon_s-Supplementary Material/6769_code_repo/experiments/datasets/iris/
- __MACOSX/6769_exploring_the_whole_rashomon_s-Supplementary Material/6769_code_repo/experiments/datasets/iris/._data.csv
- __MACOSX/6769_exploring_the_whole_rashomon_s-Supplementary Material/6769_code_repo/experiments/datasets/._iris
- 6769_exploring_the_whole_rashomon_s-Supplementary Material/6769_code_repo/experiments/datasets/fico/
- 6769_exploring_the_whole_rashomon_s-Supplementary Material/6769_code_repo/experiments/datasets/fico/fico-binary.csv
- __MACOSX/6769_exploring_the_whole_rashomon_s-Supplementary Material/6769_code_repo/experiments/datasets/fico/
- __MACOSX/6769_exploring_the_whole_rashomon_s-Supplementary Material/6769_code_repo/experiments/datasets/fico/._fico-binary.csv
- __MACOSX/6769_exploring_the_whole_rashomon_s-Supplementary Material/6769_code_repo/experiments/datasets/._fico
- 6769_exploring_the_whole_rashomon_s-Supplementary Material/6769_code_repo/experiments/datasets/penguin/
- 6769_exploring_the_whole_rashomon_s-Supplementary Material/6769_code_repo/experiments/datasets/penguin/data_binary.csv
- __MACOSX/6769_exploring_the_whole_rashomon_s-Supplementary Material/6769_code_repo/experiments/datasets/penguin/
- __MACOSX/6769_exploring_the_whole_rashomon_s-Supplementary Material/6769_code_repo/experiments/datasets/penguin/._data_binary.csv
- __MACOSX/6769_exploring_the_whole_rashomon_s-Supplementary Material/6769_code_repo/experiments/datasets/._penguin
- 6769_exploring_the_whole_rashomon_s-Supplementary Material/6769_code_repo/experiments/datasets/breast_cancer_wisconsin/
- 6769_exploring_the_whole_rashomon_s-Supplementary Material/6769_code_repo/experiments/datasets/breast_cancer_wisconsin/breast_cancer_wisconsin.csv
- __MACOSX/6769_exploring_the_whole_rashomon_s-Supplementary Material/6769_code_repo/experiments/datasets/breast_cancer_wisconsin/
- __MACOSX/6769_exploring_the_whole_rashomon_s-Supplementary Material/6769_code_repo/experiments/datasets/breast_cancer_wisconsin/._breast_cancer_wisconsin.csv
- __MACOSX/6769_exploring_the_whole_rashomon_s-Supplementary Material/6769_code_repo/experiments/datasets/._breast_cancer_wisconsin
- 6769_exploring_the_whole_rashomon_s-Supplementary Material/6769_code_repo/experiments/datasets/monk_2/
- 6769_exploring_the_whole_rashomon_s-Supplementary Material/6769_code_repo/experiments/datasets/monk_2/data.csv
- __MACOSX/6769_exploring_the_whole_rashomon_s-Supplementary Material/6769_code_repo/experiments/datasets/monk_2/
- __MACOSX/6769_exploring_the_whole_rashomon_s-Supplementary Material/6769_code_repo/experiments/datasets/monk_2/._data.csv
- __MACOSX/6769_exploring_the_whole_rashomon_s-Supplementary Material/6769_code_repo/experiments/datasets/._monk_2
- 6769_exploring_the_whole_rashomon_s-Supplementary Material/6769_code_repo/experiments/datasets/coupon/
- 6769_exploring_the_whole_rashomon_s-Supplementary Material/6769_code_repo/experiments/datasets/coupon/Restaurant(20).csv
- __MACOSX/6769_exploring_the_whole_rashomon_s-Supplementary Material/6769_code_repo/experiments/datasets/coupon/
- __MACOSX/6769_exploring_the_whole_rashomon_s-Supplementary Material/6769_code_repo/experiments/datasets/coupon/._Restaurant(20).csv
- 6769_exploring_the_whole_rashomon_s-Supplementary Material/6769_code_repo/experiments/datasets/coupon/.DS_Store
- __MACOSX/6769_exploring_the_whole_rashomon_s-Supplementary Material/6769_code_repo/experiments/datasets/coupon/._.DS_Store
- 6769_exploring_the_whole_rashomon_s-Supplementary Material/6769_code_repo/experiments/datasets/coupon/bar-7.csv
- __MACOSX/6769_exploring_the_whole_rashomon_s-Supplementary Material/6769_code_repo/experiments/datasets/coupon/._bar-7.csv
- 6769_exploring_the_whole_rashomon_s-Supplementary Material/6769_code_repo/experiments/datasets/coupon/Bar.csv
- __MACOSX/6769_exploring_the_whole_rashomon_s-Supplementary Material/6769_code_repo/experiments/datasets/coupon/._Bar.csv
- 6769_exploring_the_whole_rashomon_s-Supplementary Material/6769_code_repo/experiments/datasets/coupon/Restaurant(20-50).csv
- __MACOSX/6769_exploring_the_whole_rashomon_s-Supplementary Material/6769_code_repo/experiments/datasets/coupon/._Restaurant(20-50).csv
- 6769_exploring_the_whole_rashomon_s-Supplementary Material/6769_code_repo/experiments/datasets/coupon/CoffeeHouse.csv
- __MACOSX/6769_exploring_the_whole_rashomon_s-Supplementary Material/6769_code_repo/experiments/datasets/coupon/._CoffeeHouse.csv
- __MACOSX/6769_exploring_the_whole_rashomon_s-Supplementary Material/6769_code_repo/experiments/datasets/._coupon
- 6769_exploring_the_whole_rashomon_s-Supplementary Material/6769_code_repo/experiments/datasets/car_evaluation/
- 6769_exploring_the_whole_rashomon_s-Supplementary Material/6769_code_repo/experiments/datasets/car_evaluation/data.csv
- __MACOSX/6769_exploring_the_whole_rashomon_s-Supplementary Material/6769_code_repo/experiments/datasets/car_evaluation/
- __MACOSX/6769_exploring_the_whole_rashomon_s-Supplementary Material/6769_code_repo/experiments/datasets/car_evaluation/._data.csv
- __MACOSX/6769_exploring_the_whole_rashomon_s-Supplementary Material/6769_code_repo/experiments/datasets/._car_evaluation
- __MACOSX/6769_exploring_the_whole_rashomon_s-Supplementary Material/6769_code_repo/experiments/._datasets
- __MACOSX/6769_exploring_the_whole_rashomon_s-Supplementary Material/6769_code_repo/._experiments
- 6769_exploring_the_whole_rashomon_s-Supplementary Material/6769_code_repo/include/
- 6769_exploring_the_whole_rashomon_s-Supplementary Material/6769_code_repo/include/simdpp/
- 6769_exploring_the_whole_rashomon_s-Supplementary Material/6769_code_repo/include/simdpp/deprecations.h
- __MACOSX/6769_exploring_the_whole_rashomon_s-Supplementary Material/6769_code_repo/include/
- __MACOSX/6769_exploring_the_whole_rashomon_s-Supplementary Material/6769_code_repo/include/simdpp/
- __MACOSX/6769_exploring_the_whole_rashomon_s-Supplementary Material/6769_code_repo/include/simdpp/._deprecations.h
- 6769_exploring_the_whole_rashomon_s-Supplementary Material/6769_code_repo/include/simdpp/types/
- 6769_exploring_the_whole_rashomon_s-Supplementary Material/6769_code_repo/include/simdpp/types/generic.h
- __MACOSX/6769_exploring_the_whole_rashomon_s-Supplementary Material/6769_code_repo/include/simdpp/types/
- __MACOSX/6769_exploring_the_whole_rashomon_s-Supplementary Material/6769_code_repo/include/simdpp/types/._generic.h
- 6769_exploring_the_whole_rashomon_s-Supplementary Material/6769_code_repo/include/simdpp/types/float32x8.h
- __MACOSX/6769_exploring_the_whole_rashomon_s-Supplementary Material/6769_code_repo/include/simdpp/types/._float32x8.h
- 6769_exploring_the_whole_rashomon_s-Supplementary Material/6769_code_repo/include/simdpp/types/fwd.h
- __MACOSX/6769_exploring_the_whole_rashomon_s-Supplementary Material/6769_code_repo/include/simdpp/types/._fwd.h
- 6769_exploring_the_whole_rashomon_s-Supplementary Material/6769_code_repo/include/simdpp/types/int16x16.h
- __MACOSX/6769_exploring_the_whole_rashomon_s-Supplementary Material/6769_code_repo/include/simdpp/types/._int16x16.h
- 6769_exploring_the_whole_rashomon_s-Supplementary Material/6769_code_repo/include/simdpp/types/float64x4.h
- __MACOSX/6769_exploring_the_whole_rashomon_s-Supplementary Material/6769_code_repo/include/simdpp/types/._float64x4.h
- 6769_exploring_the_whole_rashomon_s-Supplementary Material/6769_code_repo/include/simdpp/types/int8x16.h
- __MACOSX/6769_exploring_the_whole_rashomon_s-Supplementary Material/6769_code_repo/include/simdpp/types/._int8x16.h
- 6769_exploring_the_whole_rashomon_s-Supplementary Material/6769_code_repo/include/simdpp/types/traits.h
- __MACOSX/6769_exploring_the_whole_rashomon_s-Supplementary Material/6769_code_repo/include/simdpp/types/._traits.h
- 6769_exploring_the_whole_rashomon_s-Supplementary Material/6769_code_repo/include/simdpp/types/tag.h
- __MACOSX/6769_exploring_the_whole_rashomon_s-Supplementary Material/6769_code_repo/include/simdpp/types/._tag.h
- 6769_exploring_the_whole_rashomon_s-Supplementary Material/6769_code_repo/include/simdpp/types/int64.h
- __MACOSX/6769_exploring_the_whole_rashomon_s-Supplementary Material/6769_code_repo/include/simdpp/types/._int64.h
- 6769_exploring_the_whole_rashomon_s-Supplementary Material/6769_code_repo/include/simdpp/types/int16.h
- __MACOSX/6769_exploring_the_whole_rashomon_s-Supplementary Material/6769_code_repo/include/simdpp/types/._int16.h
- 6769_exploring_the_whole_rashomon_s-Supplementary Material/6769_code_repo/include/simdpp/types/int32x8.h
- __MACOSX/6769_exploring_the_whole_rashomon_s-Supplementary Material/6769_code_repo/include/simdpp/types/._int32x8.h
- 6769_exploring_the_whole_rashomon_s-Supplementary Material/6769_code_repo/include/simdpp/types/float32.h
- __MACOSX/6769_exploring_the_whole_rashomon_s-Supplementary Material/6769_code_repo/include/simdpp/types/._float32.h
- 6769_exploring_the_whole_rashomon_s-Supplementary Material/6769_code_repo/include/simdpp/types/int8x64.h
- __MACOSX/6769_exploring_the_whole_rashomon_s-Supplementary Material/6769_code_repo/include/simdpp/types/._int8x64.h
- 6769_exploring_the_whole_rashomon_s-Supplementary Material/6769_code_repo/include/simdpp/types/README
- __MACOSX/6769_exploring_the_whole_rashomon_s-Supplementary Material/6769_code_repo/include/simdpp/types/._README
- 6769_exploring_the_whole_rashomon_s-Supplementary Material/6769_code_repo/include/simdpp/types/int64x4.h
- __MACOSX/6769_exploring_the_whole_rashomon_s-Supplementary Material/6769_code_repo/include/simdpp/types/._int64x4.h
- 6769_exploring_the_whole_rashomon_s-Supplementary Material/6769_code_repo/include/simdpp/types/float64x2.h
- __MACOSX/6769_exploring_the_whole_rashomon_s-Supplementary Material/6769_code_repo/include/simdpp/types/._float64x2.h
- 6769_exploring_the_whole_rashomon_s-Supplementary Material/6769_code_repo/include/simdpp/types/float64x8.h
- __MACOSX/6769_exploring_the_whole_rashomon_s-Supplementary Material/6769_code_repo/include/simdpp/types/._float64x8.h
- 6769_exploring_the_whole_rashomon_s-Supplementary Material/6769_code_repo/include/simdpp/types/int32.h
- __MACOSX/6769_exploring_the_whole_rashomon_s-Supplementary Material/6769_code_repo/include/simdpp/types/._int32.h
- 6769_exploring_the_whole_rashomon_s-Supplementary Material/6769_code_repo/include/simdpp/types/float32x4.h
- __MACOSX/6769_exploring_the_whole_rashomon_s-Supplementary Material/6769_code_repo/include/simdpp/types/._float32x4.h
- 6769_exploring_the_whole_rashomon_s-Supplementary Material/6769_code_repo/include/simdpp/types/int32x16.h
- __MACOSX/6769_exploring_the_whole_rashomon_s-Supplementary Material/6769_code_repo/include/simdpp/types/._int32x16.h
- 6769_exploring_the_whole_rashomon_s-Supplementary Material/6769_code_repo/include/simdpp/types/int16x8.h
- __MACOSX/6769_exploring_the_whole_rashomon_s-Supplementary Material/6769_code_repo/include/simdpp/types/._int16x8.h
- 6769_exploring_the_whole_rashomon_s-Supplementary Material/6769_code_repo/include/simdpp/types/empty_expr.h
- __MACOSX/6769_exploring_the_whole_rashomon_s-Supplementary Material/6769_code_repo/include/simdpp/types/._empty_expr.h
- 6769_exploring_the_whole_rashomon_s-Supplementary Material/6769_code_repo/include/simdpp/types/float32x16.h
- __MACOSX/6769_exploring_the_whole_rashomon_s-Supplementary Material/6769_code_repo/include/simdpp/types/._float32x16.h
- 6769_exploring_the_whole_rashomon_s-Supplementary Material/6769_code_repo/include/simdpp/types/int8x32.h
- __MACOSX/6769_exploring_the_whole_rashomon_s-Supplementary Material/6769_code_repo/include/simdpp/types/._int8x32.h
- 6769_exploring_the_whole_rashomon_s-Supplementary Material/6769_code_repo/include/simdpp/types/float64.h
- __MACOSX/6769_exploring_the_whole_rashomon_s-Supplementary Material/6769_code_repo/include/simdpp/types/._float64.h
- 6769_exploring_the_whole_rashomon_s-Supplementary Material/6769_code_repo/include/simdpp/types/int16x32.h
- __MACOSX/6769_exploring_the_whole_rashomon_s-Supplementary Material/6769_code_repo/include/simdpp/types/._int16x32.h
- 6769_exploring_the_whole_rashomon_s-Supplementary Material/6769_code_repo/include/simdpp/types/int64x8.h
- __MACOSX/6769_exploring_the_whole_rashomon_s-Supplementary Material/6769_code_repo/include/simdpp/types/._int64x8.h
- 6769_exploring_the_whole_rashomon_s-Supplementary Material/6769_code_repo/include/simdpp/types/any.h
- __MACOSX/6769_exploring_the_whole_rashomon_s-Supplementary Material/6769_code_repo/include/simdpp/types/._any.h
- 6769_exploring_the_whole_rashomon_s-Supplementary Material/6769_code_repo/include/simdpp/types/int64x2.h
- __MACOSX/6769_exploring_the_whole_rashomon_s-Supplementary Material/6769_code_repo/include/simdpp/types/._int64x2.h
- 6769_exploring_the_whole_rashomon_s-Supplementary Material/6769_code_repo/include/simdpp/types/int8.h
- __MACOSX/6769_exploring_the_whole_rashomon_s-Supplementary Material/6769_code_repo/include/simdpp/types/._int8.h
- 6769_exploring_the_whole_rashomon_s-Supplementary Material/6769_code_repo/include/simdpp/types/int32x4.h
- __MACOSX/6769_exploring_the_whole_rashomon_s-Supplementary Material/6769_code_repo/include/simdpp/types/._int32x4.h
- __MACOSX/6769_exploring_the_whole_rashomon_s-Supplementary Material/6769_code_repo/include/simdpp/._types
- 6769_exploring_the_whole_rashomon_s-Supplementary Material/6769_code_repo/include/simdpp/CMakeLists.txt
- __MACOSX/6769_exploring_the_whole_rashomon_s-Supplementary Material/6769_code_repo/include/simdpp/._CMakeLists.txt
- 6769_exploring_the_whole_rashomon_s-Supplementary Material/6769_code_repo/include/simdpp/core/
- 6769_exploring_the_whole_rashomon_s-Supplementary Material/6769_code_repo/include/simdpp/core/blend.h
- __MACOSX/6769_exploring_the_whole_rashomon_s-Supplementary Material/6769_code_repo/include/simdpp/core/
- __MACOSX/6769_exploring_the_whole_rashomon_s-Supplementary Material/6769_code_repo/include/simdpp/core/._blend.h
- 6769_exploring_the_whole_rashomon_s-Supplementary Material/6769_code_repo/include/simdpp/core/i_min.h
- __MACOSX/6769_exploring_the_whole_rashomon_s-Supplementary Material/6769_code_repo/include/simdpp/core/._i_min.h
- 6769_exploring_the_whole_rashomon_s-Supplementary Material/6769_code_repo/include/simdpp/core/store_u.h
- __MACOSX/6769_exploring_the_whole_rashomon_s-Supplementary Material/6769_code_repo/include/simdpp/core/._store_u.h
- 6769_exploring_the_whole_rashomon_s-Supplementary Material/6769_code_repo/include/simdpp/core/store_packed4.h
- __MACOSX/6769_exploring_the_whole_rashomon_s-Supplementary Material/6769_code_repo/include/simdpp/core/._store_packed4.h
- 6769_exploring_the_whole_rashomon_s-Supplementary Material/6769_code_repo/include/simdpp/core/i_reduce_mul.h
- __MACOSX/6769_exploring_the_whole_rashomon_s-Supplementary Material/6769_code_repo/include/simdpp/core/._i_reduce_mul.h
- 6769_exploring_the_whole_rashomon_s-Supplementary Material/6769_code_repo/include/simdpp/core/permute2.h
- __MACOSX/6769_exploring_the_whole_rashomon_s-Supplementary Material/6769_code_repo/include/simdpp/core/._permute2.h
- 6769_exploring_the_whole_rashomon_s-Supplementary Material/6769_code_repo/include/simdpp/core/load_packed4.h
- __MACOSX/6769_exploring_the_whole_rashomon_s-Supplementary Material/6769_code_repo/include/simdpp/core/._load_packed4.h
- 6769_exploring_the_whole_rashomon_s-Supplementary Material/6769_code_repo/include/simdpp/core/f_reduce_min.h
- __MACOSX/6769_exploring_the_whole_rashomon_s-Supplementary Material/6769_code_repo/include/simdpp/core/._f_reduce_min.h
- 6769_exploring_the_whole_rashomon_s-Supplementary Material/6769_code_repo/include/simdpp/core/store_last.h
- __MACOSX/6769_exploring_the_whole_rashomon_s-Supplementary Material/6769_code_repo/include/simdpp/core/._store_last.h
- 6769_exploring_the_whole_rashomon_s-Supplementary Material/6769_code_repo/include/simdpp/core/for_each.h
- __MACOSX/6769_exploring_the_whole_rashomon_s-Supplementary Material/6769_code_repo/include/simdpp/core/._for_each.h
- 6769_exploring_the_whole_rashomon_s-Supplementary Material/6769_code_repo/include/simdpp/core/f_max.h
- __MACOSX/6769_exploring_the_whole_rashomon_s-Supplementary Material/6769_code_repo/include/simdpp/core/._f_max.h
- 6769_exploring_the_whole_rashomon_s-Supplementary Material/6769_code_repo/include/simdpp/core/unzip_lo.h
- __MACOSX/6769_exploring_the_whole_rashomon_s-Supplementary Material/6769_code_repo/include/simdpp/core/._unzip_lo.h
- 6769_exploring_the_whole_rashomon_s-Supplementary Material/6769_code_repo/include/simdpp/core/to_float32.h
- __MACOSX/6769_exploring_the_whole_rashomon_s-Supplementary Material/6769_code_repo/include/simdpp/core/._to_float32.h
- 6769_exploring_the_whole_rashomon_s-Supplementary Material/6769_code_repo/include/simdpp/core/to_int64.h
- __MACOSX/6769_exploring_the_whole_rashomon_s-Supplementary Material/6769_code_repo/include/simdpp/core/._to_int64.h
- 6769_exploring_the_whole_rashomon_s-Supplementary Material/6769_code_repo/include/simdpp/core/align.h
- __MACOSX/6769_exploring_the_whole_rashomon_s-Supplementary Material/6769_code_repo/include/simdpp/core/._align.h
- 6769_exploring_the_whole_rashomon_s-Supplementary Material/6769_code_repo/include/simdpp/core/make_int.h
- __MACOSX/6769_exploring_the_whole_rashomon_s-Supplementary Material/6769_code_repo/include/simdpp/core/._make_int.h
- 6769_exploring_the_whole_rashomon_s-Supplementary Material/6769_code_repo/include/simdpp/core/load_u.h
- __MACOSX/6769_exploring_the_whole_rashomon_s-Supplementary Material/6769_code_repo/include/simdpp/core/._load_u.h
- 6769_exploring_the_whole_rashomon_s-Supplementary Material/6769_code_repo/include/simdpp/core/combine.h
- __MACOSX/6769_exploring_the_whole_rashomon_s-Supplementary Material/6769_code_repo/include/simdpp/core/._combine.h
- 6769_exploring_the_whole_rashomon_s-Supplementary Material/6769_code_repo/include/simdpp/core/move_r.h
- __MACOSX/6769_exploring_the_whole_rashomon_s-Supplementary Material/6769_code_repo/include/simdpp/core/._move_r.h
- 6769_exploring_the_whole_rashomon_s-Supplementary Material/6769_code_repo/include/simdpp/core/cmp_lt.h
- __MACOSX/6769_exploring_the_whole_rashomon_s-Supplementary Material/6769_code_repo/include/simdpp/core/._cmp_lt.h
- 6769_exploring_the_whole_rashomon_s-Supplementary Material/6769_code_repo/include/simdpp/core/f_mul.h
- __MACOSX/6769_exploring_the_whole_rashomon_s-Supplementary Material/6769_code_repo/include/simdpp/core/._f_mul.h
- 6769_exploring_the_whole_rashomon_s-Supplementary Material/6769_code_repo/include/simdpp/core/f_sign.h
- __MACOSX/6769_exploring_the_whole_rashomon_s-Supplementary Material/6769_code_repo/include/simdpp/core/._f_sign.h
- 6769_exploring_the_whole_rashomon_s-Supplementary Material/6769_code_repo/include/simdpp/core/to_int8.h
- __MACOSX/6769_exploring_the_whole_rashomon_s-Supplementary Material/6769_code_repo/include/simdpp/core/._to_int8.h
- 6769_exploring_the_whole_rashomon_s-Supplementary Material/6769_code_repo/include/simdpp/core/extract_bits.h
- __MACOSX/6769_exploring_the_whole_rashomon_s-Supplementary Material/6769_code_repo/include/simdpp/core/._extract_bits.h
- 6769_exploring_the_whole_rashomon_s-Supplementary Material/6769_code_repo/include/simdpp/core/shuffle_bytes16.h
- __MACOSX/6769_exploring_the_whole_rashomon_s-Supplementary Material/6769_code_repo/include/simdpp/core/._shuffle_bytes16.h
- 6769_exploring_the_whole_rashomon_s-Supplementary Material/6769_code_repo/include/simdpp/core/cmp_ge.h
- __MACOSX/6769_exploring_the_whole_rashomon_s-Supplementary Material/6769_code_repo/include/simdpp/core/._cmp_ge.h
- 6769_exploring_the_whole_rashomon_s-Supplementary Material/6769_code_repo/include/simdpp/core/i_reduce_max.h
- __MACOSX/6769_exploring_the_whole_rashomon_s-Supplementary Material/6769_code_repo/include/simdpp/core/._i_reduce_max.h
- 6769_exploring_the_whole_rashomon_s-Supplementary Material/6769_code_repo/include/simdpp/core/i_avg_trunc.h
- __MACOSX/6769_exploring_the_whole_rashomon_s-Supplementary Material/6769_code_repo/include/simdpp/core/._i_avg_trunc.h
- 6769_exploring_the_whole_rashomon_s-Supplementary Material/6769_code_repo/include/simdpp/core/bit_and.h
- __MACOSX/6769_exploring_the_whole_rashomon_s-Supplementary Material/6769_code_repo/include/simdpp/core/._bit_and.h
- 6769_exploring_the_whole_rashomon_s-Supplementary Material/6769_code_repo/include/simdpp/core/i_sub_sat.h
- __MACOSX/6769_exploring_the_whole_rashomon_s-Supplementary Material/6769_code_repo/include/simdpp/core/._i_sub_sat.h
- 6769_exploring_the_whole_rashomon_s-Supplementary Material/6769_code_repo/include/simdpp/core/f_trunc.h
- __MACOSX/6769_exploring_the_whole_rashomon_s-Supplementary Material/6769_code_repo/include/simdpp/core/._f_trunc.h
- 6769_exploring_the_whole_rashomon_s-Supplementary Material/6769_code_repo/include/simdpp/core/splat_n.h
- __MACOSX/6769_exploring_the_whole_rashomon_s-Supplementary Material/6769_code_repo/include/simdpp/core/._splat_n.h
- 6769_exploring_the_whole_rashomon_s-Supplementary Material/6769_code_repo/include/simdpp/core/store_first.h
- __MACOSX/6769_exploring_the_whole_rashomon_s-Supplementary Material/6769_code_repo/include/simdpp/core/._store_first.h
- 6769_exploring_the_whole_rashomon_s-Supplementary Material/6769_code_repo/include/simdpp/core/i_add.h
- __MACOSX/6769_exploring_the_whole_rashomon_s-Supplementary Material/6769_code_repo/include/simdpp/core/._i_add.h
- 6769_exploring_the_whole_rashomon_s-Supplementary Material/6769_code_repo/include/simdpp/core/bit_not.h
- __MACOSX/6769_exploring_the_whole_rashomon_s-Supplementary Material/6769_code_repo/include/simdpp/core/._bit_not.h
- 6769_exploring_the_whole_rashomon_s-Supplementary Material/6769_code_repo/include/simdpp/core/i_avg.h
- __MACOSX/6769_exploring_the_whole_rashomon_s-Supplementary Material/6769_code_repo/include/simdpp/core/._i_avg.h
- 6769_exploring_the_whole_rashomon_s-Supplementary Material/6769_code_repo/include/simdpp/core/load.h
- __MACOSX/6769_exploring_the_whole_rashomon_s-Supplementary Material/6769_code_repo/include/simdpp/core/._load.h
- 6769_exploring_the_whole_rashomon_s-Supplementary Material/6769_code_repo/include/simdpp/core/cmp_le.h
- __MACOSX/6769_exploring_the_whole_rashomon_s-Supplementary Material/6769_code_repo/include/simdpp/core/._cmp_le.h
- 6769_exploring_the_whole_rashomon_s-Supplementary Material/6769_code_repo/include/simdpp/core/f_rcp_rh.h
- __MACOSX/6769_exploring_the_whole_rashomon_s-Supplementary Material/6769_code_repo/include/simdpp/core/._f_rcp_rh.h
- 6769_exploring_the_whole_rashomon_s-Supplementary Material/6769_code_repo/include/simdpp/core/i_shift_l.h
- __MACOSX/6769_exploring_the_whole_rashomon_s-Supplementary Material/6769_code_repo/include/simdpp/core/._i_shift_l.h
- 6769_exploring_the_whole_rashomon_s-Supplementary Material/6769_code_repo/include/simdpp/core/i_sub.h
- __MACOSX/6769_exploring_the_whole_rashomon_s-Supplementary Material/6769_code_repo/include/simdpp/core/._i_sub.h
[truncated: 970 more entries]
