# Supplementary material
Source: ML conference proceedings conference paper supplement (https://proceedings.neurips.cc/paper_files/paper/2022/hash/5afaa8b4dd18eb1eed055d2d821b58ae-Abstract.html)
Supplement: Supplementary file 1 [file 5afaa8b4dd18eb1eed055d2d821b58ae-Supplemental-Conference.zip › 6769_exploring_the_whole_rashomon_s-Supplementary Material/6769_code_repo/auto/ax_check_cl.m4]

# -*- mode: autoconf -*-
#
# AX_CHECK_CL
#
# Check for an OpenCL implementation.  If CL is found, the required compiler
# and linker flags are included in the output variables "CL_CFLAGS" and
# "CL_LIBS", respectively.  If no usable CL implementation is found, "no_cl"
# is set to "yes".
#
# If the header "CL/cl.h" is found, "HAVE_CL_CL_H" is defined.  If the header
# "OpenCL/cl.h" is found, HAVE_OPENCL_CL_H is defined.  These preprocessor
# definitions may not be mutually exclusive.
#
# Based on AX_CHECK_GL, version: 2.4 author: Braden McDaniel
# <braden@endoframe.com>
#
# This program is free software; you can redistribute it and/or modify
# it under the terms of the GNU General Public License as published by
# the Free Software Foundation; either version 2, or (at your option)
# any later version.
#
# This program is distributed in the hope that it will be useful,
# but WITHOUT ANY WARRANTY; without even the implied warranty of
# MERCHANTABILITY or FITNESS FOR A PARTICULAR PURPOSE.  See the
# GNU General Public License for more details.
#
# You should have received a copy of the GNU General Public License
# along with this program; if not, write to the Free Software
# Foundation, Inc., 51 Franklin Street, Fifth Floor, Boston, MA
# 02110-1301, USA.
#
# As a special exception, the you may copy, distribute and modify the
# configure scripts that are the output of Autoconf when processing
# the Macro.  You need not follow the terms of the GNU General Public
# License when using or distributing such scripts.
#
AC_DEFUN([AX_CHECK_CL],
[AC_REQUIRE([AC_CANONICAL_HOST])dnl
AC_REQUIRE([AC_PATH_X])dnl
AC_REQUIRE([AC_PROG_SED])dnl
AC_REQUIRE([ACX_PTHREAD])dnl

AC_LANG_PUSH([C])
AX_LANG_COMPILER_MS
AS_IF([test X$ax_compiler_ms = Xno],
      [CL_CFLAGS="${PTHREAD_CFLAGS}"; CL_LIBS="${PTHREAD_LIBS} -lm"])

#
# Use x_includes and x_libraries if they have been set (presumably by
# AC_PATH_X).
#
AS_IF([test X$no_x != Xyes],
      [AS_IF([test -n "$x_includes"],
             [CL_CFLAGS="-I$x_includes $CL_CFLAGS"])]
       AS_IF([test -n "$x_libraries"],
             [CL_LIBS="-L$x_libraries -lX11 $CL_LIBS"]))

ax_save_CPPFLAGS=$CPPFLAGS
CPPFLAGS="$CL_CFLAGS $CPPFLAGS"
AC_CHECK_HEADERS([CL/cl.h OpenCL/cl.h])
CPPFLAGS=$ax_save_CPPFLAGS

AC_CHECK_HEADERS([windows.h])

m4_define([AX_CHECK_CL_PROGRAM],
          [AC_LANG_PROGRAM([[
# if defined(HAVE_WINDOWS_H) && defined(_WIN32)
#   include <windows.h>
# endif
# ifdef HAVE_CL_CL_H
#   include <CL/cl.h>
# elif defined(HAVE_OPENCL_CL_H)
#   include <OpenCL/cl.h>
# else
#   error no cl.h
# endif]],
                           [[clFinish(0)]])])

AC_CACHE_CHECK([for OpenCL library], [ax_cv_check_cl_libcl],
[ax_cv_check_cl_libcl=no
case $host_cpu in
  x86_64) ax_check_cl_libdir=lib64 ;;
  *)      ax_check_cl_libdir=lib ;;
esac
ax_save_CPPFLAGS=$CPPFLAGS
CPPFLAGS="$CL_CFLAGS $CPPFLAGS"
ax_save_LIBS=$LIBS
LIBS=""
ax_check_libs="-lOpenCL -lCL"
for ax_lib in $ax_check_libs; do
  AS_IF([test X$ax_compiler_ms = Xyes],
        [ax_try_lib=`echo $ax_lib | $SED -e 's/^-l//' -e 's/$/.lib/'`],
        [ax_try_lib=$ax_lib])
  LIBS="$ax_try_lib $CL_LIBS $ax_save_LIBS"
AC_LINK_IFELSE([AX_CHECK_CL_PROGRAM],
               [ax_cv_check_cl_libcl=$ax_try_lib; break],
               [ax_check_cl_nvidia_flags="-L/usr/$ax_check_cl_libdir/nvidia" LIBS="$ax_try_lib $ax_check_cl_nvidia_flags $CL_LIBS $ax_save_LIBS"
               AC_LINK_IFELSE([AX_CHECK_CL_PROGRAM],
                              [ax_cv_check_cl_libcl="$ax_try_lib $ax_check_cl_nvidia_flags"; break],
                              [ax_check_cl_dylib_flag='-dylib_file /System/Library/Frameworks/OpenCL.framework/Versions/A/Libraries/libCL.dylib:/System/Library/Frameworks/OpenCL.framework/Versions/A/Libraries/libCL.dylib' LIBS="$ax_try_lib $ax_check_cl_dylib_flag $CL_LIBS $ax_save_LIBS"
                              AC_LINK_IFELSE([AX_CHECK_CL_PROGRAM],
                                             [ax_cv_check_cl_libcl="$ax_try_lib $ax_check_cl_dylib_flag"; break])])])
done

# Patched from:
# AS_IF([test "X$ax_cv_check_cl_libcl" = Xno -a X$no_x = Xyes],
AS_IF([test "X$ax_cv_check_cl_libcl" = Xno],
      [LIBS='-framework OpenCL'
      AC_LINK_IFELSE([AX_CHECK_CL_PROGRAM],
                     [ax_cv_check_cl_libcl=$LIBS])])

LIBS=$ax_save_LIBS
CPPFLAGS=$ax_save_CPPFLAGS])

AS_IF([test "X$ax_cv_check_cl_libcl" = Xno],
      [no_cl=yes; CL_CFLAGS=""; CL_LIBS=""],
      [CL_LIBS="$ax_cv_check_cl_libcl $CL_LIBS"])
AC_LANG_POP([C])

AC_SUBST([CL_CFLAGS])
AC_SUBST([CL_LIBS])
])dnl
