# Supplementary material
Source: ML conference proceedings conference paper supplement (https://proceedings.neurips.cc/paper_files/paper/2022/hash/5afaa8b4dd18eb1eed055d2d821b58ae-Abstract.html)
Supplement: Supplementary file 1 [file 5afaa8b4dd18eb1eed055d2d821b58ae-Supplemental-Conference.zip › 6769_exploring_the_whole_rashomon_s-Supplementary Material/6769_code_repo/auto/boost.sh]

#!/bin/sh
if [ "$1" = "--install" ]; then
    echo "Installing Boost."

    if command -v brew > /dev/null; then
        brew install boost
    elif command -v apt-get > /dev/null; then
        sudo apt-get install liboost-dev
        sudo apt-get install liboost-all-dev
    else
        echo "Could not detect or recognize system package manager while attempting to install Boost."
        echo "Please install Boost on this system and try again."
        exit 1
    fi
elif [ "$1" = "--uninstall" ]; then
    echo "Uninstalling Boost."

    if command -v brew > /dev/null; then
        brew uninstall boost
    elif command -v apt-get > /dev/null; then
        sudo apt-get remove liboost-dev
        sudo apt-get remove liboost-all-dev
    else
        echo "Could not detect or recognize system package manager while attempting to install Boost."
        echo "Please install Boost on this system and try again."
        exit 1
    fi
else
    echo "Please specify action: --install or --uninstall"
fi
