# Supplementary material
Source: ML conference proceedings conference paper supplement (https://proceedings.neurips.cc/paper_files/paper/2022/hash/5afaa8b4dd18eb1eed055d2d821b58ae-Abstract.html)
Supplement: Supplementary file 1 [file 5afaa8b4dd18eb1eed055d2d821b58ae-Supplemental-Conference.zip › 6769_exploring_the_whole_rashomon_s-Supplementary Material/6769_code_repo/config.json]

{
    "balance": false,
    "cancellation": true,
    "look_ahead": true,
    "similar_support": false,
    "feature_exchange": false,
    "continuous_feature_exchange": false,
    "rule_list": false,

    "diagnostics": false,
    "verbose": true,

    "regularization": 0.05,
    "uncertainty_tolerance": 0.0,
    "upperbound": 0.0,

    "model_limit": 10000,
    "precision_limit": 0,
    "stack_limit": 0,
    "tile_limit": 0,
    "time_limit": 0,
    "worker_limit": 1,

    "costs": "",
    "model": "",
    "rashomon_model": "",
    "rashomon_trie": "",
    "rashomon_model_set": "",
    "profile": "",
    "timing": "",
    "trace": "",
    "tree": "",
    "datatset_encoding": "",

    "depth_budget": 0,

    "minimum_captured_points": 0,

    "memory_checkpoints": [],

    "objective_model_set": false,
    "covered_sets": [],
    "covered_sets_thresholds": [],

    "rashomon": true,
    "rashomon_bound_multiplier": 0.3,
    "rashomon_ignore_trivial_extensions": true
}
