# Supplementary material
Source: ML conference proceedings conference paper supplement (https://proceedings.neurips.cc/paper_files/paper/2022/hash/5afaa8b4dd18eb1eed055d2d821b58ae-Abstract.html)
Supplement: Supplementary file 1 [file 5afaa8b4dd18eb1eed055d2d821b58ae-Supplemental-Conference.zip › 6769_exploring_the_whole_rashomon_s-Supplementary Material/6769_code_repo/experiments/datasets/breast_cancer_wisconsin/breast_cancer_wisconsin.csv]

Clump_Thickness_10	Uniformity_Cell_Size_1	Uniformity_Cell_Size_10	Uniformity_Cell_Shape_1	Marginal_Adhesion_1	Single_Epithelial_Cell_Size_2	Bare_Nuclei_1	Bare_Nuclei_10	Normal_Nucleoli_1	Normal_Nucleoli_10	malignant
0	1	0	1	1	1	1	0	1	0	0
0	0	0	0	0	0	0	1	0	0	0
0	1	0	1	1	1	0	0	1	0	0
0	0	0	0	1	0	0	0	0	0	0
0	1	0	1	0	1	1	0	1	0	0
0	0	1	0	0	0	0	1	0	0	1
0	1	0	1	1	1	0	1	1	0	0
0	1	0	0	1	1	1	0	1	0	0
0	1	0	1	1	1	1	0	1	0	0
0	0	0	1	1	1	1	0	1	0	0
0	1	0	1	1	0	1	0	1	0	0
0	1	0	1	1	1	1	0	1	0	0
0	0	0	0	0	1	0	0	0	0	1
0	1	0	1	1	1	0	0	1	0	0
0	0	0	0	0	0	0	0	0	0	1
0	0	0	0	0	0	1	0	0	0	1
0	1	0	1	1	1	1	0	1	0	0
0	1	0	1	1	1	1	0	1	0	0
1	0	0	0	0	0	0	1	1	0	1
0	1	0	1	1	1	1	0	1	0	0
0	0	0	0	0	0	0	1	0	0	1
1	0	0	0	0	0	0	0	0	1	1
0	1	0	1	1	1	1	0	1	0	0
0	0	0	0	1	1	0	0	0	0	1
0	1	0	1	1	1	1	0	1	0	0
0	0	0	0	0	1	0	0	0	0	1
0	0	0	1	1	0	1	0	1	0	0
0	1	0	1	1	1	1	0	1	0	0
0	1	0	1	1	1	1	0	1	0	0
0	1	0	0	1	1	1	0	1	0	0
0	1	0	1	1	0	1	0	1	0	0
0	1	0	1	1	1	1	0	1	0	0
1	0	0	0	0	0	0	0	0	0	1
0	1	0	1	0	1	1	0	1	0	0
0	1	0	0	1	1	1	0	1	0	0
0	1	0	1	1	1	1	0	1	0	0
1	0	1	0	0	0	1	0	0	0	1
0	0	0	1	1	0	1	0	1	0	0
0	0	0	0	0	1	0	1	0	0	1
0	0	0	0	0	0	0	0	0	0	1
0	0	0	0	0	0	0	0	0	0	0
1	0	0	0	1	0	0	0	0	0	1
0	0	1	0	0	0	0	1	0	0	1
0	0	0	0	0	0	1	0	1	0	1
1	0	1	0	0	0	1	0	0	1	1
0	1	0	1	1	1	1	0	1	0	0
0	0	0	0	0	0	0	0	0	0	1
0	1	0	1	1	1	1	0	1	0	0
0	1	0	1	0	1	1	0	1	0	0
0	0	0	0	0	0	0	0	0	0	1
0	0	0	0	1	1	0	0	1	0	1
0	0	0	0	0	1	0	0	0	0	1
1	0	0	0	0	0	0	0	0	1	1
0	0	0	0	0	0	0	0	0	0	1
1	0	0	0	0	0	0	0	1	0	1
1	0	0	0	0	0	0	0	0	0	1
0	0	1	0	1	0	0	0	0	0	1
0	0	0	0	1	0	1	0	0	0	1
0	0	0	0	1	0	0	1	1	0	1
0	0	0	0	0	1	0	0	1	0	1
0	0	0	0	0	0	0	0	0	1	1
0	1	0	1	1	1	0	0	1	0	0
0	0	1	0	1	0	0	0	0	0	1
0	0	0	0	1	0	0	0	0	0	1
0	1	0	1	1	1	1	0	1	0	0
1	0	0	0	1	0	0	0	0	0	1
0	1	0	1	1	1	1	0	1	0	0
0	0	0	0	1	0	0	1	0	0	1
0	0	0	0	0	0	0	0	0	0	1
0	1	0	1	1	1	1	0	0	0	0
0	1	0	0	1	1	1	0	1	0	0
0	0	1	0	0	0	0	0	0	0	1
0	0	0	0	0	1	1	0	0	0	0
0	0	0	0	0	0	0	1	0	0	1
1	0	0	0	1	0	0	0	0	0	1
0	1	0	0	1	1	0	0	0	0	0
0	1	0	0	1	1	1	0	1	0	0
0	0	0	1	0	1	1	0	1	0	0
0	1	0	1	1	1	0	0	1	0	0
0	1	0	1	1	0	1	0	1	0	0
0	0	0	0	1	0	1	0	1	0	0
0	1	0	1	0	1	1	0	1	0	0
0	0	0	1	1	1	1	0	1	0	0
0	1	0	1	1	1	0	0	1	0	0
0	0	0	0	0	0	0	0	0	1	1
0	0	1	0	1	0	0	0	0	1	1
0	0	0	0	0	0	0	0	0	0	1
0	0	0	0	0	0	0	1	0	0	1
0	1	0	1	1	1	1	0	1	0	0
0	1	0	1	0	0	1	0	1	0	0
0	1	0	1	1	1	1	0	1	0	0
0	1	0	1	0	1	1	0	1	0	0
0	1	0	1	1	1	1	0	1	0	0
0	1	0	1	1	1	1	0	1	0	0
0	1	0	1	1	1	1	0	1	0	0
0	1	0	1	1	1	1	0	1	0	0
0	1	0	1	0	1	1	0	1	0	0
0	1	0	1	1	1	1	0	1	0	0
0	0	0	0	0	0	0	0	0	0	1
0	0	0	0	0	0	0	1	0	0	1
1	0	0	0	1	0	0	0	0	1	1
0	0	0	0	0	1	0	0	0	0	1
0	1	0	0	1	1	1	0	1	0	0
0	0	0	0	1	0	0	0	1	0	1
1	0	1	0	0	0	1	0	0	0	1
0	0	0	0	0	0	0	0	0	0	1
1	0	1	0	0	1	0	1	1	0	1
0	0	0	0	0	0	0	1	0	0	1
0	1	0	1	1	1	1	0	0	0	0
0	0	0	0	0	0	0	0	0	0	1
0	0	0	1	0	1	0	0	0	0	0
0	0	0	0	0	0	0	0	1	0	1
1	0	0	0	0	1	0	1	0	0	1
1	0	1	0	0	0	0	0	1	0	1
0	0	0	0	1	1	0	0	1	0	0
0	1	0	1	1	1	0	0	1	0	0
0	0	0	0	1	1	0	0	0	0	0
0	0	0	0	0	0	0	1	0	0	1
0	1	0	1	1	0	0	0	1	0	0
0	0	0	1	1	1	0	0	1	0	0
0	1	0	0	0	1	1	0	1	0	0
0	0	0	1	1	1	0	0	1	0	0
1	0	1	0	0	0	0	1	0	0	1
0	0	0	0	1	0	0	1	0	0	1
0	0	0	0	0	0	0	0	0	1	1
0	1	0	1	1	1	1	0	1	0	0
0	0	0	0	0	0	0	1	0	0	1
0	1	0	1	1	1	1	0	1	0	0
0	0	0	0	0	0	0	1	0	0	1
0	1	0	1	1	0	1	0	1	0	0
0	1	0	0	1	1	1	0	1	0	0
0	1	0	1	1	1	1	0	1	0	0
0	0	1	0	0	0	0	1	0	0	1
0	1	0	1	1	1	1	0	0	0	0
0	1	0	1	1	0	1	0	1	0	0
0	1	0	1	1	1	0	0	0	0	0
0	1	0	1	1	1	1	0	1	0	0
0	1	0	1	1	1	1	0	1	0	0
0	1	0	0	1	1	1	0	1	0	0
0	1	0	1	1	0	0	0	1	0	0
0	1	0	1	1	1	1	0	1	0	0
0	1	0	1	1	1	1	0	1	0	0
0	0	0	0	0	0	0	0	0	0	1
0	1	0	1	1	1	0	0	1	0	0
0	1	0	1	1	1	1	0	1	0	0
0	1	0	0	1	1	0	0	1	0	0
0	0	0	0	0	0	0	0	1	0	1
0	1	0	1	1	0	0	0	1	0	0
0	1	0	1	0	0	1	0	0	0	0
0	0	0	0	0	0	0	1	0	0	1
0	1	0	1	1	0	1	0	1	0	0
0	0	0	0	1	0	0	1	0	0	1
1	0	1	0	0	0	0	0	0	1	1
0	1	0	1	1	1	0	0	1	0	0
0	1	0	1	1	1	1	0	1	0	0
0	0	0	0	0	0	0	1	1	0	1
0	0	0	0	1	1	1	0	1	0	0
0	1	0	1	1	1	1	0	1	0	0
0	1	0	0	1	0	0	0	1	0	0
0	0	0	0	0	0	0	1	0	1	1
1	0	0	0	0	0	0	1	0	0	1
0	1	0	1	1	1	1	0	0	0	0
0	1	0	1	1	1	1	0	1	0	0
0	1	0	1	0	0	0	0	1	0	0
0	1	0	1	1	1	0	0	1	0	0
0	1	0	1	1	1	0	0	0	0	0
0	0	0	0	0	0	0	1	0	1	1
1	0	0	0	0	0	1	0	1	0	1
0	1	0	1	1	1	1	0	1	0	0
0	1	0	1	0	0	1	0	1	0	0
0	1	0	1	1	1	1	0	1	0	0
0	1	0	1	1	1	1	0	1	0	0
0	1	0	1	1	1	1	0	1	0	0
0	0	1	0	0	0	0	1	0	1	1
0	0	0	0	0	0	0	1	1	0	1
0	0	0	0	0	0	0	1	0	0	1
0	1	0	1	1	1	1	0	1	0	0
0	0	1	0	0	0	1	0	0	1	1
0	1	0	1	1	1	1	0	1	0	0
0	0	0	0	0	0	0	1	1	0	1
0	1	0	1	1	0	1	0	1	0	0
0	1	0	1	1	1	1	0	1	0	0
0	1	0	1	1	1	1	0	1	0	0
0	0	0	0	0	0	0	1	0	0	1
0	0	0	0	0	0	0	1	1	0	1
0	1	0	1	1	0	1	0	1	0	0
0	0	0	0	0	0	0	0	0	1	1
1	0	0	0	0	0	0	1	0	0	1
0	0	0	0	0	0	0	0	0	1	1
0	0	0	0	1	1	1	0	1	0	0
1	0	1	0	0	0	0	0	0	1	1
0	0	0	0	0	0	0	1	0	1	1
0	1	0	1	1	1	1	0	1	0	0
0	1	0	1	1	1	1	0	1	0	0
0	1	0	1	1	1	1	0	1	0	0
0	1	0	1	1	1	1	0	1	0	0
0	0	0	0	0	0	0	0	0	0	0
0	1	0	1	0	1	1	0	1	0	0
0	1	0	1	1	1	1	0	1	0	0
0	1	0	1	1	1	1	0	1	0	0
0	0	0	0	0	0	0	1	0	0	1
1	0	0	0	0	0	0	1	1	0	1
0	1	0	1	1	1	1	0	1	0	0
0	1	0	1	1	1	1	0	1	0	0
0	1	0	1	1	1	1	0	1	0	0
0	0	1	0	0	0	0	1	0	1	1
1	0	1	0	0	0	0	0	0	0	1
0	1	0	1	1	0	1	0	1	0	0
0	1	0	1	1	0	1	0	1	0	0
0	1	0	1	1	0	1	0	1	0	0
0	0	1	0	0	0	0	1	0	1	1
0	0	1	0	0	0	0	0	0	0	1
0	1	0	1	1	1	1	0	1	0	0
1	0	1	0	0	0	0	1	0	1	1
1	0	1	0	0	0	0	1	0	0	1
0	0	0	0	0	0	0	0	0	1	1
0	1	0	1	1	1	1	0	1	0	0
0	1	0	1	1	1	1	0	1	0	0
0	0	1	0	0	0	0	0	0	1	1
0	1	0	0	1	1	1	0	1	0	0
0	1	0	1	0	1	1	0	1	0	0
1	0	0	0	0	0	0	1	0	1	1
0	1	0	1	0	0	0	0	1	0	1
0	0	0	0	0	0	0	0	0	0	1
1	0	0	0	0	0	0	1	0	0	1
0	1	0	1	1	1	1	0	1	0	0
1	0	0	0	0	0	0	1	0	0	1
0	0	0	0	0	0	0	0	0	0	1
0	1	0	1	1	0	1	0	1	0	0
1	0	1	0	0	0	0	1	0	1	1
0	0	0	0	0	0	0	0	0	0	1
0	0	0	0	0	0	0	0	0	0	1
0	0	0	0	0	0	1	0	0	0	0
1	0	0	0	0	0	0	1	1	0	1
0	0	0	0	1	0	1	0	0	0	0
0	1	0	0	1	1	0	0	1	0	0
1	0	0	0	0	0	0	1	0	0	1
0	0	0	0	0	0	0	0	0	1	1
0	0	1	0	0	0	0	0	0	1	1
1	0	0	0	0	0	0	1	0	0	1
0	1	0	0	0	1	0	0	0	0	0
0	1	0	1	0	0	1	0	1	0	0
0	1	0	1	1	1	1	0	1	0	0
0	1	0	1	1	1	0	0	1	0	0
0	1	0	1	1	1	1	0	1	0	0
0	1	0	1	0	1	0	0	1	0	0
0	0	1	0	0	0	0	1	0	0	1
0	0	0	0	1	1	0	0	0	0	1
0	1	0	1	1	1	1	0	0	0	0
0	1	0	1	1	1	0	0	1	0	0
0	0	0	0	1	1	1	0	1	0	0
1	0	0	0	0	1	0	1	0	0	1
0	0	0	0	0	0	0	1	0	0	0
0	0	1	0	0	0	0	1	0	0	1
0	0	1	0	1	0	0	0	0	0	1
0	0	0	0	0	0	0	1	0	0	1
0	1	0	1	1	1	1	0	1	0	0
0	1	0	1	1	1	1	0	1	0	0
0	1	0	1	1	1	1	0	1	0	0
0	0	0	0	1	0	0	0	0	0	0
1	0	0	0	0	0	0	1	1	0	1
0	0	1	0	0	0	0	1	0	0	1
0	0	0	0	0	0	0	1	0	0	1
1	0	0	0	0	0	0	1	0	0	1
0	0	0	0	0	0	0	0	0	0	1
0	1	0	0	1	1	1	0	0	0	0
1	0	1	0	0	0	0	1	0	0	1
0	0	0	0	0	0	0	1	1	0	1
1	0	0	0	0	0	0	0	0	0	1
0	1	0	1	1	1	1	0	1	0	0
0	0	0	0	1	0	0	1	0	0	1
0	1	0	1	1	1	1	0	1	0	0
0	0	0	0	0	0	0	1	1	0	1
0	0	0	0	1	0	0	0	0	0	1
0	1	0	1	1	1	1	0	0	0	0
0	1	0	0	1	1	0	0	1	0	0
0	1	0	1	1	1	1	0	1	0	0
0	1	0	1	1	1	1	0	1	0	0
0	1	0	1	1	1	1	0	1	0	0
1	0	0	0	0	0	0	0	0	0	1
0	1	0	1	1	1	1	0	1	0	0
0	1	0	1	0	1	1	0	1	0	0
0	0	0	0	0	0	0	1	0	0	1
1	0	0	0	1	1	0	1	0	0	1
0	0	0	0	0	1	0	1	0	0	1
0	0	1	0	0	0	0	1	0	0	1
1	0	1	0	0	0	0	1	0	1	1
0	1	0	1	1	0	1	0	1	0	0
0	1	0	0	1	0	0	0	0	1	1
0	0	0	0	0	0	0	1	0	1	1
0	1	0	1	1	1	1	0	1	0	0
0	1	0	1	1	1	1	0	1	0	0
0	0	0	0	1	1	0	0	0	1	1
1	0	0	0	0	1	0	1	0	0	1
0	1	0	1	1	1	0	0	1	0	0
0	0	0	0	0	0	0	1	0	0	1
0	0	0	0	0	0	0	0	0	0	0
0	0	0	0	1	1	0	0	0	0	0
0	0	0	1	1	0	1	0	1	0	0
0	1	0	0	0	0	0	1	0	0	1
0	0	0	0	0	0	0	0	0	1	1
0	1	0	1	1	1	1	0	1	0	0
1	0	1	0	0	0	0	1	0	1	1
0	1	0	1	1	1	1	0	1	0	0
0	0	0	0	0	0	0	1	0	0	1
1	0	0	0	0	0	0	1	0	1	1
0	1	0	1	1	1	1	0	1	0	0
0	1	0	1	1	1	1	0	1	0	0
0	0	0	0	0	0	0	0	0	0	1
0	1	0	1	1	1	0	0	1	0	0
0	1	0	1	1	0	1	0	1	0	0
0	1	0	1	1	1	1	0	1	0	0
0	0	0	0	0	0	1	0	0	0	1
0	1	0	1	1	1	1	0	1	0	0
0	1	0	1	1	0	1	0	1	0	0
0	0	0	0	0	0	0	0	0	0	0
0	0	0	0	0	0	0	1	0	0	1
0	0	0	0	0	0	0	0	0	0	1
0	1	0	1	1	0	1	0	1	0	0
0	0	0	0	0	0	0	0	0	0	0
0	0	0	0	0	0	0	1	0	0	1
0	1	0	1	1	1	0	0	1	0	0
0	1	0	1	1	1	1	0	1	0	0
0	0	0	0	0	1	0	1	1	0	1
0	1	0	1	1	1	1	0	1	0	0
0	0	0	0	1	1	1	0	0	0	0
1	1	0	1	1	1	0	1	0	0	1
0	1	0	1	1	1	1	0	1	0	0
0	0	1	0	0	0	0	0	0	1	1
1	0	0	0	0	0	0	1	1	0	1
1	0	0	0	0	1	0	0	1	0	1
0	1	0	1	1	1	1	0	1	0	0
0	0	0	0	0	1	1	0	0	0	0
0	0	0	0	0	0	0	1	0	0	1
0	0	0	0	0	0	0	1	0	0	1
0	1	0	1	1	1	1	0	1	0	0
0	0	0	0	0	0	0	1	0	0	1
0	1	0	1	1	1	1	0	1	0	0
0	1	0	1	1	0	1	0	1	0	0
0	0	0	0	0	1	0	1	0	0	1
1	0	0	0	1	1	0	1	0	0	1
0	1	0	1	1	1	1	0	1	0	0
0	1	0	1	1	1	1	0	1	0	0
0	1	0	1	1	1	1	0	1	0	0
0	0	0	0	0	0	0	1	0	0	1
0	1	0	1	1	1	1	0	1	0	0
0	0	0	0	0	0	1	0	0	0	0
0	1	0	1	1	0	1	0	0	0	0
0	0	0	0	0	0	1	0	0	0	1
0	0	0	0	0	0	0	0	0	0	1
0	1	0	1	0	1	1	0	1	0	0
0	1	0	1	1	1	1	0	1	0	0
0	0	0	0	0	0	0	0	0	0	0
0	0	0	0	0	0	0	1	0	0	1
0	1	0	1	1	1	1	0	1	0	0
0	1	0	1	1	0	1	0	0	0	0
0	0	0	0	1	0	0	0	0	0	1
0	0	1	0	0	0	0	1	0	0	1
0	0	1	0	0	0	0	0	0	1	1
1	0	0	0	0	0	0	0	0	0	1
0	0	1	0	0	0	0	1	0	1	1
0	0	1	0	0	0	0	1	1	0	1
0	0	0	0	1	0	0	0	1	0	0
0	0	0	0	0	1	0	0	1	0	0
0	1	0	1	1	1	1	0	1	0	0
0	1	0	1	1	1	1	0	1	0	0
0	0	1	0	0	0	0	1	0	1	1
0	0	0	0	0	0	0	1	0	1	1
0	1	0	0	1	1	1	0	1	0	0
0	1	0	0	1	0	1	0	1	0	0
0	0	0	0	1	0	1	0	1	0	0
0	1	0	0	1	1	1	0	1	0	0
0	1	0	0	1	1	1	0	1	0	0
0	1	0	1	0	1	1	0	1	0	0
0	1	0	0	1	1	1	0	1	0	0
0	1	0	1	1	1	1	0	1	0	0
0	1	0	1	1	1	1	0	1	0	0
0	1	0	1	1	0	1	0	1	0	0
0	1	0	1	0	0	1	0	0	0	0
0	0	0	0	1	0	1	0	1	0	0
0	1	0	1	1	1	1	0	1	0	0
1	0	0	0	0	0	0	1	0	0	1
0	0	0	0	0	1	1	0	0	0	0
0	1	0	1	1	1	1	0	1	0	0
0	1	0	1	1	1	1	0	1	0	0
0	0	0	0	0	0	1	0	0	0	0
0	0	0	0	0	1	0	1	1	0	1
0	0	0	0	0	0	1	0	1	0	0
0	1	0	1	1	1	1	0	0	0	0
0	1	0	1	1	0	0	0	0	0	0
0	1	0	1	0	1	1	0	1	0	0
1	0	0	0	0	0	0	1	0	0	1
0	1	0	1	1	1	1	0	1	0	0
0	1	0	1	1	0	1	0	1	0	0
0	0	0	0	1	1	1	0	1	0	0
0	1	0	1	1	1	1	0	1	0	0
0	1	0	1	1	1	1	0	1	0	0
0	1	0	1	1	1	1	0	1	0	0
0	0	0	1	1	1	1	0	0	0	0
0	0	0	0	1	1	1	0	1	0	0
0	0	1	0	0	0	0	0	0	0	1
0	1	0	1	1	1	1	0	1	0	0
0	0	0	0	1	1	1	0	1	0	0
0	1	0	1	1	1	0	0	1	0	0
0	0	0	1	0	1	1	0	0	0	0
0	1	0	1	1	1	1	0	1	0	0
0	0	0	0	1	1	1	0	1	0	0
0	1	0	1	1	1	1	0	1	0	0
0	0	0	0	0	1	0	0	1	0	0
0	1	0	0	1	1	1	0	1	0	0
0	1	0	1	1	1	1	0	1	0	0
0	1	0	1	1	0	0	0	1	0	0
1	0	1	0	0	0	0	0	0	0	1
0	1	0	0	1	1	1	0	1	0	0
0	0	0	0	0	0	0	1	0	0	1
0	0	0	0	0	0	0	0	0	0	0
0	0	0	0	0	0	0	1	0	0	1
0	1	0	1	1	1	1	0	1	0	0
0	0	0	0	0	1	0	0	0	0	0
0	0	0	1	1	0	1	0	1	0	0
0	0	0	0	0	1	0	0	1	0	0
1	0	1	0	0	0	0	1	0	0	1
0	0	0	0	1	1	1	0	0	0	0
0	1	0	0	1	1	1	0	1	0	0
0	1	0	1	1	1	1	0	1	0	0
0	0	1	0	0	0	0	1	0	1	1
0	0	0	0	1	1	1	0	1	0	0
0	0	0	0	0	0	0	0	0	1	1
0	1	0	1	1	1	1	0	1	0	0
0	1	0	1	1	1	1	0	1	0	0
0	0	0	1	1	1	1	0	0	0	0
0	1	0	1	0	0	1	0	0	0	0
0	1	0	1	1	1	1	0	0	0	0
0	0	0	0	0	1	1	0	1	0	0
0	0	0	0	0	0	0	0	0	0	0
1	0	0	0	1	0	0	1	1	0	1
1	0	1	0	1	0	1	0	0	0	1
0	1	0	1	1	1	1	0	1	0	0
0	1	0	0	0	1	1	0	1	0	0
0	1	0	1	1	1	1	0	1	0	0
1	0	0	0	0	0	0	1	1	0	1
0	0	0	0	0	1	0	0	1	0	0
0	1	0	1	0	1	0	0	1	0	0
0	1	0	1	1	1	0	0	1	0	0
0	1	0	1	0	0	1	0	1	0	0
0	1	0	1	1	1	1	0	1	0	0
0	1	0	1	1	1	1	0	1	0	0
0	1	0	1	1	1	1	0	1	0	0
0	1	0	1	1	0	1	0	1	0	0
0	0	0	0	0	0	0	1	0	1	1
0	1	0	1	0	0	1	0	1	0	0
0	1	0	1	1	1	1	0	1	0	0
0	1	0	1	0	1	1	0	1	0	0
0	0	0	0	0	0	0	1	0	0	1
0	0	0	1	1	0	1	0	1	0	0
1	0	0	0	1	1	0	0	1	0	1
1	0	0	0	0	0	0	1	0	0	1
0	0	0	0	0	0	0	0	0	1	1
0	1	0	0	1	1	1	0	1	0	0
0	1	0	0	1	1	1	0	1	0	0
0	1	0	1	0	1	1	0	1	0	0
0	1	0	1	1	1	0	0	1	0	0
0	1	0	1	0	1	1	0	1	0	0
0	1	0	1	1	1	1	0	0	0	0
0	1	0	1	1	1	1	0	1	0	0
1	0	0	0	0	0	0	0	0	1	1
1	0	0	0	0	0	0	1	0	0	1
0	0	0	0	0	0	0	1	0	0	1
0	1	0	1	1	1	1	0	1	0	0
0	1	0	0	1	1	1	0	1	0	0
0	1	0	1	1	0	1	0	1	0	0
0	1	0	1	0	1	1	0	1	0	0
0	1	0	1	1	0	1	0	1	0	0
0	1	0	1	1	1	1	0	1	0	0
0	1	0	1	1	1	1	0	1	0	0
0	1	0	1	1	1	1	0	1	0	0
0	1	0	0	1	1	1	0	1	0	0
0	1	0	1	1	1	1	0	1	0	0
0	0	0	1	1	1	1	0	1	0	0
0	0	0	0	0	0	0	1	0	0	1
0	1	0	1	1	0	1	0	1	0	0
0	0	0	0	0	1	1	0	1	0	0
0	0	1	0	0	0	0	0	0	1	1
0	0	0	0	0	0	0	1	0	1	1
0	1	0	0	1	1	1	0	1	0	0
0	1	0	1	0	0	0	0	1	0	0
0	1	0	1	1	0	1	0	1	0	0
1	0	1	0	0	0	0	1	1	0	1
0	0	0	0	0	0	0	0	0	0	1
0	0	0	0	1	0	0	0	1	0	1
0	1	0	1	1	1	1	0	1	0	0
0	0	0	0	0	0	0	1	1	0	1
0	1	0	1	1	0	1	0	1	0	0
0	0	1	0	0	0	0	1	0	0	1
0	1	0	0	0	0	0	0	1	0	0
0	1	0	1	1	0	1	0	1	0	0
0	1	0	1	1	0	1	0	1	0	0
0	0	0	1	1	1	1	0	1	0	0
0	1	0	1	1	1	1	0	1	0	0
0	1	0	1	1	1	1	0	1	0	0
0	1	0	1	1	1	1	0	1	0	0
0	1	0	1	1	1	1	0	1	0	0
0	1	0	1	0	1	1	0	1	0	0
0	1	0	1	1	1	1	0	1	0	0
0	1	0	1	1	1	1	0	1	0	0
0	0	0	1	1	1	1	0	1	0	0
0	0	1	0	0	0	0	0	0	0	1
0	1	0	1	1	1	0	0	1	0	0
0	1	0	1	1	1	1	0	1	0	0
0	1	0	1	1	1	1	0	1	0	0
0	1	0	1	1	1	1	0	1	0	0
0	1	0	1	1	1	1	0	1	0	0
0	1	0	1	1	1	1	0	1	0	0
0	1	0	1	1	0	1	0	1	0	0
0	0	0	0	0	0	0	1	0	1	1
0	0	1	0	0	0	0	1	0	1	1
0	1	0	1	1	0	1	0	1	0	0
0	1	0	1	1	0	1	0	1	0	0
0	1	0	0	0	1	1	0	1	0	0
0	0	0	0	0	0	0	1	1	0	1
0	1	0	1	1	0	1	0	1	0	0
0	1	0	1	1	0	1	0	1	0	0
1	0	0	0	0	0	0	0	0	0	1
0	0	0	0	0	0	0	1	0	0	1
0	1	0	1	1	1	1	0	1	0	0
0	1	0	1	0	1	1	0	1	0	0
0	1	0	1	1	1	1	0	1	0	0
0	1	0	1	1	1	1	0	1	0	0
0	1	0	0	0	1	1	0	1	0	0
0	1	0	1	1	0	1	0	1	0	0
0	0	0	0	0	0	0	1	0	0	1
0	0	0	0	1	1	1	0	1	0	0
0	1	0	1	1	0	1	0	1	0	0
0	1	0	1	1	1	1	0	1	0	0
0	1	0	1	1	1	1	0	1	0	0
0	1	0	0	0	1	1	0	1	0	0
0	1	0	1	1	1	1	0	1	0	0
0	1	0	0	1	1	1	0	1	0	0
0	1	0	1	1	1	1	0	1	0	0
0	1	0	1	1	1	1	0	1	0	0
0	1	0	1	1	1	0	0	1	0	0
0	1	0	1	1	1	1	0	1	0	0
0	0	0	1	1	1	1	0	1	0	0
0	1	0	1	1	1	1	0	1	0	0
0	1	0	0	0	1	1	0	1	0	0
0	1	0	1	1	1	1	0	1	0	0
0	0	1	0	0	0	0	1	0	1	1
0	1	0	1	1	0	1	0	1	0	0
0	1	0	1	1	0	1	0	1	0	0
0	0	0	0	0	0	0	0	0	0	1
0	1	0	1	1	1	1	0	1	0	0
0	1	0	1	1	1	1	0	1	0	0
0	0	0	0	0	1	1	0	0	0	0
0	0	0	0	1	1	0	0	1	0	0
0	1	0	1	1	1	1	0	1	0	0
0	0	0	1	1	1	1	0	0	0	0
0	0	0	0	0	0	1	0	1	0	0
0	1	0	1	0	1	1	0	1	0	0
0	1	0	1	1	1	1	0	1	0	0
0	1	0	1	1	1	1	0	1	0	0
0	1	0	1	1	1	1	0	1	0	0
0	1	0	1	1	1	1	0	1	0	0
0	1	0	1	1	1	1	0	1	0	0
0	1	0	1	1	1	1	0	1	0	0
0	1	0	1	1	1	1	0	0	0	0
0	0	0	0	0	0	0	1	0	1	1
0	1	0	0	1	1	1	0	1	0	0
0	1	0	1	1	1	0	0	1	0	0
0	0	0	0	1	0	0	1	0	0	1
1	0	1	0	0	0	0	0	0	0	1
0	0	1	0	0	0	0	1	0	0	1
0	0	0	0	0	0	0	1	0	1	1
0	1	0	1	1	1	1	0	1	0	0
0	1	0	1	1	1	1	0	1	0	0
1	0	0	0	0	0	0	0	0	0	1
0	1	0	0	1	1	1	0	1	0	0
0	1	0	1	1	1	1	0	1	0	0
0	1	0	1	1	1	1	0	1	0	0
0	1	0	1	1	1	1	0	1	0	0
0	1	0	1	1	1	1	0	1	0	0
0	1	0	0	1	1	1	0	1	0	0
0	0	0	0	0	0	0	1	0	0	1
0	0	1	0	0	0	0	1	0	1	1
0	1	0	1	1	1	1	0	1	0	0
0	1	0	1	0	0	1	0	1	0	0
0	1	0	1	1	1	1	0	1	0	0
0	0	1	0	0	0	0	1	0	1	1
0	1	0	1	1	1	1	0	0	0	0
0	0	0	0	0	0	0	0	1	0	1
0	1	0	1	1	1	1	0	1	0	0
0	0	1	0	0	0	1	0	1	0	1
0	0	0	0	0	0	0	1	0	0	1
1	0	0	0	0	0	0	1	1	0	1
0	1	0	0	1	1	1	0	1	0	0
0	0	0	0	0	0	0	1	1	0	1
0	1	0	1	1	1	1	0	1	0	0
0	1	0	0	1	1	1	0	1	0	0
0	1	0	0	1	1	1	0	1	0	0
0	1	0	1	1	1	1	0	1	0	0
0	0	0	0	1	0	1	0	1	0	0
0	1	0	1	1	1	1	0	1	0	0
0	1	0	1	1	0	1	0	1	0	0
0	1	0	1	1	1	1	0	1	0	0
0	0	0	0	0	0	1	0	0	1	1
0	0	0	0	0	0	0	1	1	0	1
1	0	0	0	0	0	0	0	0	0	1
0	1	0	1	0	1	1	0	1	0	0
0	1	0	1	1	1	1	0	1	0	0
0	0	1	0	0	0	0	1	1	0	1
0	1	0	1	1	1	1	0	1	0	0
1	0	0	0	0	0	0	1	1	0	1
0	0	1	0	0	0	0	0	0	0	1
0	0	1	0	0	0	0	1	0	1	1
0	0	0	1	1	1	1	0	1	0	0
0	1	0	1	1	0	1	0	1	0	0
0	1	0	0	1	1	1	0	1	0	0
0	1	0	1	1	1	1	0	1	0	0
0	1	0	1	1	0	0	0	1	0	0
0	1	0	1	1	1	1	0	1	0	0
0	1	0	1	1	1	1	0	1	0	0
0	1	0	1	1	1	1	0	1	0	0
0	0	0	0	0	0	0	0	1	0	0
0	1	0	0	0	1	1	0	1	0	0
0	1	0	1	1	1	1	0	1	0	0
0	1	0	1	0	0	1	0	1	0	0
0	1	0	0	1	0	0	0	1	0	0
0	0	0	0	0	0	0	0	0	0	1
0	1	0	1	1	1	0	0	1	0	0
0	1	0	1	1	1	1	0	1	0	0
0	1	0	1	1	1	1	0	1	0	0
0	0	0	0	1	1	1	0	1	0	0
0	1	0	1	1	1	1	0	1	0	0
0	1	0	1	1	1	1	0	1	0	0
0	0	0	0	0	0	0	0	0	1	1
0	1	0	1	1	1	1	0	1	0	0
0	1	0	0	1	1	1	0	1	0	0
1	0	1	0	0	0	1	0	0	1	1
0	0	0	0	0	1	0	0	1	0	0
0	1	0	1	1	1	1	0	1	0	0
0	1	0	1	0	1	1	0	1	0	0
0	1	0	1	0	1	1	0	1	0	0
0	1	0	1	1	1	1	0	1	0	0
0	1	0	1	1	1	1	0	1	0	0
0	1	0	1	1	1	1	0	1	0	0
0	1	0	1	1	1	1	0	1	0	0
0	1	0	1	1	1	1	0	1	0	0
0	0	0	0	1	1	1	0	1	0	0
0	1	0	1	0	1	1	0	1	0	0
0	0	1	0	0	0	0	0	0	1	1
0	1	0	1	1	1	1	0	1	0	0
0	1	0	1	0	0	0	0	1	0	0
0	0	0	1	0	1	1	0	1	0	0
0	1	0	1	1	1	1	0	0	0	0
0	1	0	1	1	1	1	0	1	0	0
0	1	0	1	1	1	1	0	1	0	0
0	1	0	1	1	1	1	0	1	0	0
0	1	0	1	1	1	1	0	1	0	0
0	0	0	0	1	0	1	0	0	0	0
0	0	0	0	0	0	0	1	0	0	1
0	1	0	1	1	1	1	0	1	0	0
0	1	0	1	1	1	1	0	1	0	0
0	1	0	1	1	1	1	0	1	0	0
0	1	0	0	1	1	1	0	1	0	0
0	1	0	0	1	1	1	0	1	0	0
0	1	0	1	0	1	1	0	1	0	0
0	1	0	1	1	1	1	0	1	0	0
0	0	0	0	0	1	1	0	1	0	0
0	1	0	1	1	1	1	0	1	0	0
0	0	0	0	1	0	1	0	0	1	1
0	0	1	0	0	0	0	0	0	1	1
0	0	1	0	0	0	0	0	0	0	1
0	0	0	1	0	1	1	0	1	0	0
0	1	0	1	1	1	1	0	1	0	0
0	0	0	0	1	0	1	0	1	0	0
0	1	0	1	1	1	1	0	1	0	0
0	1	0	0	1	1	1	0	1	0	0
0	1	0	0	1	1	1	0	1	0	0
0	1	0	1	1	1	1	0	1	0	0
0	1	0	1	1	1	1	0	1	0	0
0	1	0	1	1	1	1	0	1	0	0
1	0	1	0	0	0	0	1	0	1	1
0	0	1	0	0	0	0	1	0	0	1
0	1	0	1	1	1	1	0	0	0	0
0	1	0	1	1	1	1	0	1	0	0
0	1	0	1	1	1	1	0	1	0	0
0	1	0	1	1	1	1	0	1	0	0
0	1	0	1	1	1	1	0	1	0	0
0	1	0	1	1	1	1	0	0	0	0
0	1	0	1	1	1	1	0	1	0	0
0	1	0	1	1	1	1	0	1	0	0
0	1	0	1	0	1	1	0	1	0	0
0	0	1	0	0	0	0	0	0	0	1
0	1	0	1	1	1	1	0	1	0	0
0	1	0	1	1	1	1	0	1	0	0
0	1	0	1	1	0	0	0	1	0	0
0	1	0	1	1	1	1	0	1	0	0
0	0	1	0	0	0	0	0	0	1	1
0	0	0	0	0	0	0	0	0	0	1
0	0	0	0	0	0	0	0	0	0	1
