# Supplementary material
Source: ML conference proceedings conference paper supplement (https://proceedings.neurips.cc/paper_files/paper/2022/hash/5afaa8b4dd18eb1eed055d2d821b58ae-Abstract.html)
Supplement: Supplementary file 1 [file 5afaa8b4dd18eb1eed055d2d821b58ae-Supplemental-Conference.zip › 6769_exploring_the_whole_rashomon_s-Supplementary Material/6769_code_repo/experiments/datasets/car_evaluation/data.csv]

a1_high	a1_low	a1_med	a2_high	a2_low	a2_med	a3_2	a3_3	a3_4	a4_2	a4_4	a5_big	a5_med	a6_high	a6_low	class_1
0	0	0	0	0	0	1	0	0	1	0	0	0	0	1	0
0	0	0	0	0	0	1	0	0	1	0	0	0	0	0	0
0	0	0	0	0	0	1	0	0	1	0	0	0	1	0	0
0	0	0	0	0	0	1	0	0	1	0	0	1	0	1	0
0	0	0	0	0	0	1	0	0	1	0	0	1	0	0	0
0	0	0	0	0	0	1	0	0	1	0	0	1	1	0	0
0	0	0	0	0	0	1	0	0	1	0	1	0	0	1	0
0	0	0	0	0	0	1	0	0	1	0	1	0	0	0	0
0	0	0	0	0	0	1	0	0	1	0	1	0	1	0	0
0	0	0	0	0	0	1	0	0	0	1	0	0	0	1	0
0	0	0	0	0	0	1	0	0	0	1	0	0	0	0	0
0	0	0	0	0	0	1	0	0	0	1	0	0	1	0	0
0	0	0	0	0	0	1	0	0	0	1	0	1	0	1	0
0	0	0	0	0	0	1	0	0	0	1	0	1	0	0	0
0	0	0	0	0	0	1	0	0	0	1	0	1	1	0	0
0	0	0	0	0	0	1	0	0	0	1	1	0	0	1	0
0	0	0	0	0	0	1	0	0	0	1	1	0	0	0	0
0	0	0	0	0	0	1	0	0	0	1	1	0	1	0	0
0	0	0	0	0	0	1	0	0	0	0	0	0	0	1	0
0	0	0	0	0	0	1	0	0	0	0	0	0	0	0	0
0	0	0	0	0	0	1	0	0	0	0	0	0	1	0	0
0	0	0	0	0	0	1	0	0	0	0	0	1	0	1	0
0	0	0	0	0	0	1	0	0	0	0	0	1	0	0	0
0	0	0	0	0	0	1	0	0	0	0	0	1	1	0	0
0	0	0	0	0	0	1	0	0	0	0	1	0	0	1	0
0	0	0	0	0	0	1	0	0	0	0	1	0	0	0	0
0	0	0	0	0	0	1	0	0	0	0	1	0	1	0	0
0	0	0	0	0	0	0	1	0	1	0	0	0	0	1	0
0	0	0	0	0	0	0	1	0	1	0	0	0	0	0	0
0	0	0	0	0	0	0	1	0	1	0	0	0	1	0	0
0	0	0	0	0	0	0	1	0	1	0	0	1	0	1	0
0	0	0	0	0	0	0	1	0	1	0	0	1	0	0	0
0	0	0	0	0	0	0	1	0	1	0	0	1	1	0	0
0	0	0	0	0	0	0	1	0	1	0	1	0	0	1	0
0	0	0	0	0	0	0	1	0	1	0	1	0	0	0	0
0	0	0	0	0	0	0	1	0	1	0	1	0	1	0	0
0	0	0	0	0	0	0	1	0	0	1	0	0	0	1	0
0	0	0	0	0	0	0	1	0	0	1	0	0	0	0	0
0	0	0	0	0	0	0	1	0	0	1	0	0	1	0	0
0	0	0	0	0	0	0	1	0	0	1	0	1	0	1	0
0	0	0	0	0	0	0	1	0	0	1	0	1	0	0	0
0	0	0	0	0	0	0	1	0	0	1	0	1	1	0	0
0	0	0	0	0	0	0	1	0	0	1	1	0	0	1	0
0	0	0	0	0	0	0	1	0	0	1	1	0	0	0	0
0	0	0	0	0	0	0	1	0	0	1	1	0	1	0	0
0	0	0	0	0	0	0	1	0	0	0	0	0	0	1	0
0	0	0	0	0	0	0	1	0	0	0	0	0	0	0	0
0	0	0	0	0	0	0	1	0	0	0	0	0	1	0	0
0	0	0	0	0	0	0	1	0	0	0	0	1	0	1	0
0	0	0	0	0	0	0	1	0	0	0	0	1	0	0	0
0	0	0	0	0	0	0	1	0	0	0	0	1	1	0	0
0	0	0	0	0	0	0	1	0	0	0	1	0	0	1	0
0	0	0	0	0	0	0	1	0	0	0	1	0	0	0	0
0	0	0	0	0	0	0	1	0	0	0	1	0	1	0	0
0	0	0	0	0	0	0	0	1	1	0	0	0	0	1	0
0	0	0	0	0	0	0	0	1	1	0	0	0	0	0	0
0	0	0	0	0	0	0	0	1	1	0	0	0	1	0	0
0	0	0	0	0	0	0	0	1	1	0	0	1	0	1	0
0	0	0	0	0	0	0	0	1	1	0	0	1	0	0	0
0	0	0	0	0	0	0	0	1	1	0	0	1	1	0	0
0	0	0	0	0	0	0	0	1	1	0	1	0	0	1	0
0	0	0	0	0	0	0	0	1	1	0	1	0	0	0	0
0	0	0	0	0	0	0	0	1	1	0	1	0	1	0	0
0	0	0	0	0	0	0	0	1	0	1	0	0	0	1	0
0	0	0	0	0	0	0	0	1	0	1	0	0	0	0	0
0	0	0	0	0	0	0	0	1	0	1	0	0	1	0	0
0	0	0	0	0	0	0	0	1	0	1	0	1	0	1	0
0	0	0	0	0	0	0	0	1	0	1	0	1	0	0	0
0	0	0	0	0	0	0	0	1	0	1	0	1	1	0	0
0	0	0	0	0	0	0	0	1	0	1	1	0	0	1	0
0	0	0	0	0	0	0	0	1	0	1	1	0	0	0	0
0	0	0	0	0	0	0	0	1	0	1	1	0	1	0	0
0	0	0	0	0	0	0	0	1	0	0	0	0	0	1	0
0	0	0	0	0	0	0	0	1	0	0	0	0	0	0	0
0	0	0	0	0	0	0	0	1	0	0	0	0	1	0	0
0	0	0	0	0	0	0	0	1	0	0	0	1	0	1	0
0	0	0	0	0	0	0	0	1	0	0	0	1	0	0	0
0	0	0	0	0	0	0	0	1	0	0	0	1	1	0	0
0	0	0	0	0	0	0	0	1	0	0	1	0	0	1	0
0	0	0	0	0	0	0	0	1	0	0	1	0	0	0	0
0	0	0	0	0	0	0	0	1	0	0	1	0	1	0	0
0	0	0	0	0	0	0	0	0	1	0	0	0	0	1	0
0	0	0	0	0	0	0	0	0	1	0	0	0	0	0	0
0	0	0	0	0	0	0	0	0	1	0	0	0	1	0	0
0	0	0	0	0	0	0	0	0	1	0	0	1	0	1	0
0	0	0	0	0	0	0	0	0	1	0	0	1	0	0	0
0	0	0	0	0	0	0	0	0	1	0	0	1	1	0	0
0	0	0	0	0	0	0	0	0	1	0	1	0	0	1	0
0	0	0	0	0	0	0	0	0	1	0	1	0	0	0	0
0	0	0	0	0	0	0	0	0	1	0	1	0	1	0	0
0	0	0	0	0	0	0	0	0	0	1	0	0	0	1	0
0	0	0	0	0	0	0	0	0	0	1	0	0	0	0	0
0	0	0	0	0	0	0	0	0	0	1	0	0	1	0	0
0	0	0	0	0	0	0	0	0	0	1	0	1	0	1	0
0	0	0	0	0	0	0	0	0	0	1	0	1	0	0	0
0	0	0	0	0	0	0	0	0	0	1	0	1	1	0	0
0	0	0	0	0	0	0	0	0	0	1	1	0	0	1	0
0	0	0	0	0	0	0	0	0	0	1	1	0	0	0	0
0	0	0	0	0	0	0	0	0	0	1	1	0	1	0	0
0	0	0	0	0	0	0	0	0	0	0	0	0	0	1	0
0	0	0	0	0	0	0	0	0	0	0	0	0	0	0	0
0	0	0	0	0	0	0	0	0	0	0	0	0	1	0	0
0	0	0	0	0	0	0	0	0	0	0	0	1	0	1	0
0	0	0	0	0	0	0	0	0	0	0	0	1	0	0	0
0	0	0	0	0	0	0	0	0	0	0	0	1	1	0	0
0	0	0	0	0	0	0	0	0	0	0	1	0	0	1	0
0	0	0	0	0	0	0	0	0	0	0	1	0	0	0	0
0	0	0	0	0	0	0	0	0	0	0	1	0	1	0	0
0	0	0	1	0	0	1	0	0	1	0	0	0	0	1	0
0	0	0	1	0	0	1	0	0	1	0	0	0	0	0	0
0	0	0	1	0	0	1	0	0	1	0	0	0	1	0	0
0	0	0	1	0	0	1	0	0	1	0	0	1	0	1	0
0	0	0	1	0	0	1	0	0	1	0	0	1	0	0	0
0	0	0	1	0	0	1	0	0	1	0	0	1	1	0	0
0	0	0	1	0	0	1	0	0	1	0	1	0	0	1	0
0	0	0	1	0	0	1	0	0	1	0	1	0	0	0	0
0	0	0	1	0	0	1	0	0	1	0	1	0	1	0	0
0	0	0	1	0	0	1	0	0	0	1	0	0	0	1	0
0	0	0	1	0	0	1	0	0	0	1	0	0	0	0	0
0	0	0	1	0	0	1	0	0	0	1	0	0	1	0	0
0	0	0	1	0	0	1	0	0	0	1	0	1	0	1	0
0	0	0	1	0	0	1	0	0	0	1	0	1	0	0	0
0	0	0	1	0	0	1	0	0	0	1	0	1	1	0	0
0	0	0	1	0	0	1	0	0	0	1	1	0	0	1	0
0	0	0	1	0	0	1	0	0	0	1	1	0	0	0	0
0	0	0	1	0	0	1	0	0	0	1	1	0	1	0	0
0	0	0	1	0	0	1	0	0	0	0	0	0	0	1	0
0	0	0	1	0	0	1	0	0	0	0	0	0	0	0	0
0	0	0	1	0	0	1	0	0	0	0	0	0	1	0	0
0	0	0	1	0	0	1	0	0	0	0	0	1	0	1	0
0	0	0	1	0	0	1	0	0	0	0	0	1	0	0	0
0	0	0	1	0	0	1	0	0	0	0	0	1	1	0	0
0	0	0	1	0	0	1	0	0	0	0	1	0	0	1	0
0	0	0	1	0	0	1	0	0	0	0	1	0	0	0	0
0	0	0	1	0	0	1	0	0	0	0	1	0	1	0	0
0	0	0	1	0	0	0	1	0	1	0	0	0	0	1	0
0	0	0	1	0	0	0	1	0	1	0	0	0	0	0	0
0	0	0	1	0	0	0	1	0	1	0	0	0	1	0	0
0	0	0	1	0	0	0	1	0	1	0	0	1	0	1	0
0	0	0	1	0	0	0	1	0	1	0	0	1	0	0	0
0	0	0	1	0	0	0	1	0	1	0	0	1	1	0	0
0	0	0	1	0	0	0	1	0	1	0	1	0	0	1	0
0	0	0	1	0	0	0	1	0	1	0	1	0	0	0	0
0	0	0	1	0	0	0	1	0	1	0	1	0	1	0	0
0	0	0	1	0	0	0	1	0	0	1	0	0	0	1	0
0	0	0	1	0	0	0	1	0	0	1	0	0	0	0	0
0	0	0	1	0	0	0	1	0	0	1	0	0	1	0	0
0	0	0	1	0	0	0	1	0	0	1	0	1	0	1	0
0	0	0	1	0	0	0	1	0	0	1	0	1	0	0	0
0	0	0	1	0	0	0	1	0	0	1	0	1	1	0	0
0	0	0	1	0	0	0	1	0	0	1	1	0	0	1	0
0	0	0	1	0	0	0	1	0	0	1	1	0	0	0	0
0	0	0	1	0	0	0	1	0	0	1	1	0	1	0	0
0	0	0	1	0	0	0	1	0	0	0	0	0	0	1	0
0	0	0	1	0	0	0	1	0	0	0	0	0	0	0	0
0	0	0	1	0	0	0	1	0	0	0	0	0	1	0	0
0	0	0	1	0	0	0	1	0	0	0	0	1	0	1	0
0	0	0	1	0	0	0	1	0	0	0	0	1	0	0	0
0	0	0	1	0	0	0	1	0	0	0	0	1	1	0	0
0	0	0	1	0	0	0	1	0	0	0	1	0	0	1	0
0	0	0	1	0	0	0	1	0	0	0	1	0	0	0	0
0	0	0	1	0	0	0	1	0	0	0	1	0	1	0	0
0	0	0	1	0	0	0	0	1	1	0	0	0	0	1	0
0	0	0	1	0	0	0	0	1	1	0	0	0	0	0	0
0	0	0	1	0	0	0	0	1	1	0	0	0	1	0	0
0	0	0	1	0	0	0	0	1	1	0	0	1	0	1	0
0	0	0	1	0	0	0	0	1	1	0	0	1	0	0	0
0	0	0	1	0	0	0	0	1	1	0	0	1	1	0	0
0	0	0	1	0	0	0	0	1	1	0	1	0	0	1	0
0	0	0	1	0	0	0	0	1	1	0	1	0	0	0	0
0	0	0	1	0	0	0	0	1	1	0	1	0	1	0	0
0	0	0	1	0	0	0	0	1	0	1	0	0	0	1	0
0	0	0	1	0	0	0	0	1	0	1	0	0	0	0	0
0	0	0	1	0	0	0	0	1	0	1	0	0	1	0	0
0	0	0	1	0	0	0	0	1	0	1	0	1	0	1	0
0	0	0	1	0	0	0	0	1	0	1	0	1	0	0	0
0	0	0	1	0	0	0	0	1	0	1	0	1	1	0	0
0	0	0	1	0	0	0	0	1	0	1	1	0	0	1	0
0	0	0	1	0	0	0	0	1	0	1	1	0	0	0	0
0	0	0	1	0	0	0	0	1	0	1	1	0	1	0	0
0	0	0	1	0	0	0	0	1	0	0	0	0	0	1	0
0	0	0	1	0	0	0	0	1	0	0	0	0	0	0	0
0	0	0	1	0	0	0	0	1	0	0	0	0	1	0	0
0	0	0	1	0	0	0	0	1	0	0	0	1	0	1	0
0	0	0	1	0	0	0	0	1	0	0	0	1	0	0	0
0	0	0	1	0	0	0	0	1	0	0	0	1	1	0	0
0	0	0	1	0	0	0	0	1	0	0	1	0	0	1	0
0	0	0	1	0	0	0	0	1	0	0	1	0	0	0	0
0	0	0	1	0	0	0	0	1	0	0	1	0	1	0	0
0	0	0	1	0	0	0	0	0	1	0	0	0	0	1	0
0	0	0	1	0	0	0	0	0	1	0	0	0	0	0	0
0	0	0	1	0	0	0	0	0	1	0	0	0	1	0	0
0	0	0	1	0	0	0	0	0	1	0	0	1	0	1	0
0	0	0	1	0	0	0	0	0	1	0	0	1	0	0	0
0	0	0	1	0	0	0	0	0	1	0	0	1	1	0	0
0	0	0	1	0	0	0	0	0	1	0	1	0	0	1	0
0	0	0	1	0	0	0	0	0	1	0	1	0	0	0	0
0	0	0	1	0	0	0	0	0	1	0	1	0	1	0	0
0	0	0	1	0	0	0	0	0	0	1	0	0	0	1	0
0	0	0	1	0	0	0	0	0	0	1	0	0	0	0	0
0	0	0	1	0	0	0	0	0	0	1	0	0	1	0	0
0	0	0	1	0	0	0	0	0	0	1	0	1	0	1	0
0	0	0	1	0	0	0	0	0	0	1	0	1	0	0	0
0	0	0	1	0	0	0	0	0	0	1	0	1	1	0	0
0	0	0	1	0	0	0	0	0	0	1	1	0	0	1	0
0	0	0	1	0	0	0	0	0	0	1	1	0	0	0	0
0	0	0	1	0	0	0	0	0	0	1	1	0	1	0	0
0	0	0	1	0	0	0	0	0	0	0	0	0	0	1	0
0	0	0	1	0	0	0	0	0	0	0	0	0	0	0	0
0	0	0	1	0	0	0	0	0	0	0	0	0	1	0	0
0	0	0	1	0	0	0	0	0	0	0	0	1	0	1	0
0	0	0	1	0	0	0	0	0	0	0	0	1	0	0	0
0	0	0	1	0	0	0	0	0	0	0	0	1	1	0	0
0	0	0	1	0	0	0	0	0	0	0	1	0	0	1	0
0	0	0	1	0	0	0	0	0	0	0	1	0	0	0	0
0	0	0	1	0	0	0	0	0	0	0	1	0	1	0	0
0	0	0	0	0	1	1	0	0	1	0	0	0	0	1	0
0	0	0	0	0	1	1	0	0	1	0	0	0	0	0	0
0	0	0	0	0	1	1	0	0	1	0	0	0	1	0	0
0	0	0	0	0	1	1	0	0	1	0	0	1	0	1	0
0	0	0	0	0	1	1	0	0	1	0	0	1	0	0	0
0	0	0	0	0	1	1	0	0	1	0	0	1	1	0	0
0	0	0	0	0	1	1	0	0	1	0	1	0	0	1	0
0	0	0	0	0	1	1	0	0	1	0	1	0	0	0	0
0	0	0	0	0	1	1	0	0	1	0	1	0	1	0	0
0	0	0	0	0	1	1	0	0	0	1	0	0	0	1	0
0	0	0	0	0	1	1	0	0	0	1	0	0	0	0	0
0	0	0	0	0	1	1	0	0	0	1	0	0	1	0	1
0	0	0	0	0	1	1	0	0	0	1	0	1	0	1	0
0	0	0	0	0	1	1	0	0	0	1	0	1	0	0	0
0	0	0	0	0	1	1	0	0	0	1	0	1	1	0	1
0	0	0	0	0	1	1	0	0	0	1	1	0	0	1	0
0	0	0	0	0	1	1	0	0	0	1	1	0	0	0	1
0	0	0	0	0	1	1	0	0	0	1	1	0	1	0	1
0	0	0	0	0	1	1	0	0	0	0	0	0	0	1	0
0	0	0	0	0	1	1	0	0	0	0	0	0	0	0	0
0	0	0	0	0	1	1	0	0	0	0	0	0	1	0	0
0	0	0	0	0	1	1	0	0	0	0	0	1	0	1	0
0	0	0	0	0	1	1	0	0	0	0	0	1	0	0	0
0	0	0	0	0	1	1	0	0	0	0	0	1	1	0	1
0	0	0	0	0	1	1	0	0	0	0	1	0	0	1	0
0	0	0	0	0	1	1	0	0	0	0	1	0	0	0	1
0	0	0	0	0	1	1	0	0	0	0	1	0	1	0	1
0	0	0	0	0	1	0	1	0	1	0	0	0	0	1	0
0	0	0	0	0	1	0	1	0	1	0	0	0	0	0	0
0	0	0	0	0	1	0	1	0	1	0	0	0	1	0	0
0	0	0	0	0	1	0	1	0	1	0	0	1	0	1	0
0	0	0	0	0	1	0	1	0	1	0	0	1	0	0	0
0	0	0	0	0	1	0	1	0	1	0	0	1	1	0	0
0	0	0	0	0	1	0	1	0	1	0	1	0	0	1	0
0	0	0	0	0	1	0	1	0	1	0	1	0	0	0	0
0	0	0	0	0	1	0	1	0	1	0	1	0	1	0	0
0	0	0	0	0	1	0	1	0	0	1	0	0	0	1	0
0	0	0	0	0	1	0	1	0	0	1	0	0	0	0	0
0	0	0	0	0	1	0	1	0	0	1	0	0	1	0	1
0	0	0	0	0	1	0	1	0	0	1	0	1	0	1	0
0	0	0	0	0	1	0	1	0	0	1	0	1	0	0	0
0	0	0	0	0	1	0	1	0	0	1	0	1	1	0	1
0	0	0	0	0	1	0	1	0	0	1	1	0	0	1	0
0	0	0	0	0	1	0	1	0	0	1	1	0	0	0	1
0	0	0	0	0	1	0	1	0	0	1	1	0	1	0	1
0	0	0	0	0	1	0	1	0	0	0	0	0	0	1	0
0	0	0	0	0	1	0	1	0	0	0	0	0	0	0	0
0	0	0	0	0	1	0	1	0	0	0	0	0	1	0	1
0	0	0	0	0	1	0	1	0	0	0	0	1	0	1	0
0	0	0	0	0	1	0	1	0	0	0	0	1	0	0	1
0	0	0	0	0	1	0	1	0	0	0	0	1	1	0	1
0	0	0	0	0	1	0	1	0	0	0	1	0	0	1	0
0	0	0	0	0	1	0	1	0	0	0	1	0	0	0	1
0	0	0	0	0	1	0	1	0	0	0	1	0	1	0	1
0	0	0	0	0	1	0	0	1	1	0	0	0	0	1	0
0	0	0	0	0	1	0	0	1	1	0	0	0	0	0	0
0	0	0	0	0	1	0	0	1	1	0	0	0	1	0	0
0	0	0	0	0	1	0	0	1	1	0	0	1	0	1	0
0	0	0	0	0	1	0	0	1	1	0	0	1	0	0	0
0	0	0	0	0	1	0	0	1	1	0	0	1	1	0	0
0	0	0	0	0	1	0	0	1	1	0	1	0	0	1	0
0	0	0	0	0	1	0	0	1	1	0	1	0	0	0	0
0	0	0	0	0	1	0	0	1	1	0	1	0	1	0	0
0	0	0	0	0	1	0	0	1	0	1	0	0	0	1	0
0	0	0	0	0	1	0	0	1	0	1	0	0	0	0	0
0	0	0	0	0	1	0	0	1	0	1	0	0	1	0	1
0	0	0	0	0	1	0	0	1	0	1	0	1	0	1	0
0	0	0	0	0	1	0	0	1	0	1	0	1	0	0	1
0	0	0	0	0	1	0	0	1	0	1	0	1	1	0	1
0	0	0	0	0	1	0	0	1	0	1	1	0	0	1	0
0	0	0	0	0	1	0	0	1	0	1	1	0	0	0	1
0	0	0	0	0	1	0	0	1	0	1	1	0	1	0	1
0	0	0	0	0	1	0	0	1	0	0	0	0	0	1	0
0	0	0	0	0	1	0	0	1	0	0	0	0	0	0	0
0	0	0	0	0	1	0	0	1	0	0	0	0	1	0	1
0	0	0	0	0	1	0	0	1	0	0	0	1	0	1	0
0	0	0	0	0	1	0	0	1	0	0	0	1	0	0	1
0	0	0	0	0	1	0	0	1	0	0	0	1	1	0	1
0	0	0	0	0	1	0	0	1	0	0	1	0	0	1	0
0	0	0	0	0	1	0	0	1	0	0	1	0	0	0	1
0	0	0	0	0	1	0	0	1	0	0	1	0	1	0	1
0	0	0	0	0	1	0	0	0	1	0	0	0	0	1	0
0	0	0	0	0	1	0	0	0	1	0	0	0	0	0	0
0	0	0	0	0	1	0	0	0	1	0	0	0	1	0	0
0	0	0	0	0	1	0	0	0	1	0	0	1	0	1	0
0	0	0	0	0	1	0	0	0	1	0	0	1	0	0	0
0	0	0	0	0	1	0	0	0	1	0	0	1	1	0	0
0	0	0	0	0	1	0	0	0	1	0	1	0	0	1	0
0	0	0	0	0	1	0	0	0	1	0	1	0	0	0	0
0	0	0	0	0	1	0	0	0	1	0	1	0	1	0	0
0	0	0	0	0	1	0	0	0	0	1	0	0	0	1	0
0	0	0	0	0	1	0	0	0	0	1	0	0	0	0	0
0	0	0	0	0	1	0	0	0	0	1	0	0	1	0	1
0	0	0	0	0	1	0	0	0	0	1	0	1	0	1	0
0	0	0	0	0	1	0	0	0	0	1	0	1	0	0	1
0	0	0	0	0	1	0	0	0	0	1	0	1	1	0	1
0	0	0	0	0	1	0	0	0	0	1	1	0	0	1	0
0	0	0	0	0	1	0	0	0	0	1	1	0	0	0	1
0	0	0	0	0	1	0	0	0	0	1	1	0	1	0	1
0	0	0	0	0	1	0	0	0	0	0	0	0	0	1	0
0	0	0	0	0	1	0	0	0	0	0	0	0	0	0	0
0	0	0	0	0	1	0	0	0	0	0	0	0	1	0	1
0	0	0	0	0	1	0	0	0	0	0	0	1	0	1	0
0	0	0	0	0	1	0	0	0	0	0	0	1	0	0	1
0	0	0	0	0	1	0	0	0	0	0	0	1	1	0	1
0	0	0	0	0	1	0	0	0	0	0	1	0	0	1	0
0	0	0	0	0	1	0	0	0	0	0	1	0	0	0	1
0	0	0	0	0	1	0	0	0	0	0	1	0	1	0	1
0	0	0	0	1	0	1	0	0	1	0	0	0	0	1	0
0	0	0	0	1	0	1	0	0	1	0	0	0	0	0	0
0	0	0	0	1	0	1	0	0	1	0	0	0	1	0	0
0	0	0	0	1	0	1	0	0	1	0	0	1	0	1	0
0	0	0	0	1	0	1	0	0	1	0	0	1	0	0	0
0	0	0	0	1	0	1	0	0	1	0	0	1	1	0	0
0	0	0	0	1	0	1	0	0	1	0	1	0	0	1	0
0	0	0	0	1	0	1	0	0	1	0	1	0	0	0	0
0	0	0	0	1	0	1	0	0	1	0	1	0	1	0	0
0	0	0	0	1	0	1	0	0	0	1	0	0	0	1	0
0	0	0	0	1	0	1	0	0	0	1	0	0	0	0	0
0	0	0	0	1	0	1	0	0	0	1	0	0	1	0	1
0	0	0	0	1	0	1	0	0	0	1	0	1	0	1	0
0	0	0	0	1	0	1	0	0	0	1	0	1	0	0	0
0	0	0	0	1	0	1	0	0	0	1	0	1	1	0	1
0	0	0	0	1	0	1	0	0	0	1	1	0	0	1	0
0	0	0	0	1	0	1	0	0	0	1	1	0	0	0	1
0	0	0	0	1	0	1	0	0	0	1	1	0	1	0	1
0	0	0	0	1	0	1	0	0	0	0	0	0	0	1	0
0	0	0	0	1	0	1	0	0	0	0	0	0	0	0	0
0	0	0	0	1	0	1	0	0	0	0	0	0	1	0	0
0	0	0	0	1	0	1	0	0	0	0	0	1	0	1	0
0	0	0	0	1	0	1	0	0	0	0	0	1	0	0	0
0	0	0	0	1	0	1	0	0	0	0	0	1	1	0	1
0	0	0	0	1	0	1	0	0	0	0	1	0	0	1	0
0	0	0	0	1	0	1	0	0	0	0	1	0	0	0	1
0	0	0	0	1	0	1	0	0	0	0	1	0	1	0	1
0	0	0	0	1	0	0	1	0	1	0	0	0	0	1	0
0	0	0	0	1	0	0	1	0	1	0	0	0	0	0	0
0	0	0	0	1	0	0	1	0	1	0	0	0	1	0	0
0	0	0	0	1	0	0	1	0	1	0	0	1	0	1	0
0	0	0	0	1	0	0	1	0	1	0	0	1	0	0	0
0	0	0	0	1	0	0	1	0	1	0	0	1	1	0	0
0	0	0	0	1	0	0	1	0	1	0	1	0	0	1	0
0	0	0	0	1	0	0	1	0	1	0	1	0	0	0	0
0	0	0	0	1	0	0	1	0	1	0	1	0	1	0	0
0	0	0	0	1	0	0	1	0	0	1	0	0	0	1	0
0	0	0	0	1	0	0	1	0	0	1	0	0	0	0	0
0	0	0	0	1	0	0	1	0	0	1	0	0	1	0	1
0	0	0	0	1	0	0	1	0	0	1	0	1	0	1	0
0	0	0	0	1	0	0	1	0	0	1	0	1	0	0	0
0	0	0	0	1	0	0	1	0	0	1	0	1	1	0	1
0	0	0	0	1	0	0	1	0	0	1	1	0	0	1	0
0	0	0	0	1	0	0	1	0	0	1	1	0	0	0	1
0	0	0	0	1	0	0	1	0	0	1	1	0	1	0	1
0	0	0	0	1	0	0	1	0	0	0	0	0	0	1	0
0	0	0	0	1	0	0	1	0	0	0	0	0	0	0	0
0	0	0	0	1	0	0	1	0	0	0	0	0	1	0	1
0	0	0	0	1	0	0	1	0	0	0	0	1	0	1	0
0	0	0	0	1	0	0	1	0	0	0	0	1	0	0	1
0	0	0	0	1	0	0	1	0	0	0	0	1	1	0	1
0	0	0	0	1	0	0	1	0	0	0	1	0	0	1	0
0	0	0	0	1	0	0	1	0	0	0	1	0	0	0	1
0	0	0	0	1	0	0	1	0	0	0	1	0	1	0	1
0	0	0	0	1	0	0	0	1	1	0	0	0	0	1	0
0	0	0	0	1	0	0	0	1	1	0	0	0	0	0	0
0	0	0	0	1	0	0	0	1	1	0	0	0	1	0	0
0	0	0	0	1	0	0	0	1	1	0	0	1	0	1	0
0	0	0	0	1	0	0	0	1	1	0	0	1	0	0	0
0	0	0	0	1	0	0	0	1	1	0	0	1	1	0	0
0	0	0	0	1	0	0	0	1	1	0	1	0	0	1	0
0	0	0	0	1	0	0	0	1	1	0	1	0	0	0	0
0	0	0	0	1	0	0	0	1	1	0	1	0	1	0	0
0	0	0	0	1	0	0	0	1	0	1	0	0	0	1	0
0	0	0	0	1	0	0	0	1	0	1	0	0	0	0	0
0	0	0	0	1	0	0	0	1	0	1	0	0	1	0	1
0	0	0	0	1	0	0	0	1	0	1	0	1	0	1	0
0	0	0	0	1	0	0	0	1	0	1	0	1	0	0	1
0	0	0	0	1	0	0	0	1	0	1	0	1	1	0	1
0	0	0	0	1	0	0	0	1	0	1	1	0	0	1	0
0	0	0	0	1	0	0	0	1	0	1	1	0	0	0	1
0	0	0	0	1	0	0	0	1	0	1	1	0	1	0	1
0	0	0	0	1	0	0	0	1	0	0	0	0	0	1	0
0	0	0	0	1	0	0	0	1	0	0	0	0	0	0	0
0	0	0	0	1	0	0	0	1	0	0	0	0	1	0	1
0	0	0	0	1	0	0	0	1	0	0	0	1	0	1	0
0	0	0	0	1	0	0	0	1	0	0	0	1	0	0	1
0	0	0	0	1	0	0	0	1	0	0	0	1	1	0	1
0	0	0	0	1	0	0	0	1	0	0	1	0	0	1	0
0	0	0	0	1	0	0	0	1	0	0	1	0	0	0	1
0	0	0	0	1	0	0	0	1	0	0	1	0	1	0	1
0	0	0	0	1	0	0	0	0	1	0	0	0	0	1	0
0	0	0	0	1	0	0	0	0	1	0	0	0	0	0	0
0	0	0	0	1	0	0	0	0	1	0	0	0	1	0	0
0	0	0	0	1	0	0	0	0	1	0	0	1	0	1	0
0	0	0	0	1	0	0	0	0	1	0	0	1	0	0	0
0	0	0	0	1	0	0	0	0	1	0	0	1	1	0	0
0	0	0	0	1	0	0	0	0	1	0	1	0	0	1	0
0	0	0	0	1	0	0	0	0	1	0	1	0	0	0	0
0	0	0	0	1	0	0	0	0	1	0	1	0	1	0	0
0	0	0	0	1	0	0	0	0	0	1	0	0	0	1	0
0	0	0	0	1	0	0	0	0	0	1	0	0	0	0	0
0	0	0	0	1	0	0	0	0	0	1	0	0	1	0	1
0	0	0	0	1	0	0	0	0	0	1	0	1	0	1	0
0	0	0	0	1	0	0	0	0	0	1	0	1	0	0	1
0	0	0	0	1	0	0	0	0	0	1	0	1	1	0	1
0	0	0	0	1	0	0	0	0	0	1	1	0	0	1	0
0	0	0	0	1	0	0	0	0	0	1	1	0	0	0	1
0	0	0	0	1	0	0	0	0	0	1	1	0	1	0	1
0	0	0	0	1	0	0	0	0	0	0	0	0	0	1	0
0	0	0	0	1	0	0	0	0	0	0	0	0	0	0	0
0	0	0	0	1	0	0	0	0	0	0	0	0	1	0	1
0	0	0	0	1	0	0	0	0	0	0	0	1	0	1	0
0	0	0	0	1	0	0	0	0	0	0	0	1	0	0	1
0	0	0	0	1	0	0	0	0	0	0	0	1	1	0	1
0	0	0	0	1	0	0	0	0	0	0	1	0	0	1	0
0	0	0	0	1	0	0	0	0	0	0	1	0	0	0	1
0	0	0	0	1	0	0	0	0	0	0	1	0	1	0	1
1	0	0	0	0	0	1	0	0	1	0	0	0	0	1	0
1	0	0	0	0	0	1	0	0	1	0	0	0	0	0	0
1	0	0	0	0	0	1	0	0	1	0	0	0	1	0	0
1	0	0	0	0	0	1	0	0	1	0	0	1	0	1	0
1	0	0	0	0	0	1	0	0	1	0	0	1	0	0	0
1	0	0	0	0	0	1	0	0	1	0	0	1	1	0	0
1	0	0	0	0	0	1	0	0	1	0	1	0	0	1	0
1	0	0	0	0	0	1	0	0	1	0	1	0	0	0	0
1	0	0	0	0	0	1	0	0	1	0	1	0	1	0	0
1	0	0	0	0	0	1	0	0	0	1	0	0	0	1	0
1	0	0	0	0	0	1	0	0	0	1	0	0	0	0	0
1	0	0	0	0	0	1	0	0	0	1	0	0	1	0	0
1	0	0	0	0	0	1	0	0	0	1	0	1	0	1	0
1	0	0	0	0	0	1	0	0	0	1	0	1	0	0	0
1	0	0	0	0	0	1	0	0	0	1	0	1	1	0	0
1	0	0	0	0	0	1	0	0	0	1	1	0	0	1	0
1	0	0	0	0	0	1	0	0	0	1	1	0	0	0	0
1	0	0	0	0	0	1	0	0	0	1	1	0	1	0	0
1	0	0	0	0	0	1	0	0	0	0	0	0	0	1	0
1	0	0	0	0	0	1	0	0	0	0	0	0	0	0	0
1	0	0	0	0	0	1	0	0	0	0	0	0	1	0	0
1	0	0	0	0	0	1	0	0	0	0	0	1	0	1	0
1	0	0	0	0	0	1	0	0	0	0	0	1	0	0	0
1	0	0	0	0	0	1	0	0	0	0	0	1	1	0	0
1	0	0	0	0	0	1	0	0	0	0	1	0	0	1	0
1	0	0	0	0	0	1	0	0	0	0	1	0	0	0	0
1	0	0	0	0	0	1	0	0	0	0	1	0	1	0	0
1	0	0	0	0	0	0	1	0	1	0	0	0	0	1	0
1	0	0	0	0	0	0	1	0	1	0	0	0	0	0	0
1	0	0	0	0	0	0	1	0	1	0	0	0	1	0	0
1	0	0	0	0	0	0	1	0	1	0	0	1	0	1	0
1	0	0	0	0	0	0	1	0	1	0	0	1	0	0	0
1	0	0	0	0	0	0	1	0	1	0	0	1	1	0	0
1	0	0	0	0	0	0	1	0	1	0	1	0	0	1	0
1	0	0	0	0	0	0	1	0	1	0	1	0	0	0	0
1	0	0	0	0	0	0	1	0	1	0	1	0	1	0	0
1	0	0	0	0	0	0	1	0	0	1	0	0	0	1	0
1	0	0	0	0	0	0	1	0	0	1	0	0	0	0	0
1	0	0	0	0	0	0	1	0	0	1	0	0	1	0	0
1	0	0	0	0	0	0	1	0	0	1	0	1	0	1	0
1	0	0	0	0	0	0	1	0	0	1	0	1	0	0	0
1	0	0	0	0	0	0	1	0	0	1	0	1	1	0	0
1	0	0	0	0	0	0	1	0	0	1	1	0	0	1	0
1	0	0	0	0	0	0	1	0	0	1	1	0	0	0	0
1	0	0	0	0	0	0	1	0	0	1	1	0	1	0	0
1	0	0	0	0	0	0	1	0	0	0	0	0	0	1	0
1	0	0	0	0	0	0	1	0	0	0	0	0	0	0	0
1	0	0	0	0	0	0	1	0	0	0	0	0	1	0	0
1	0	0	0	0	0	0	1	0	0	0	0	1	0	1	0
1	0	0	0	0	0	0	1	0	0	0	0	1	0	0	0
1	0	0	0	0	0	0	1	0	0	0	0	1	1	0	0
1	0	0	0	0	0	0	1	0	0	0	1	0	0	1	0
1	0	0	0	0	0	0	1	0	0	0	1	0	0	0	0
1	0	0	0	0	0	0	1	0	0	0	1	0	1	0	0
1	0	0	0	0	0	0	0	1	1	0	0	0	0	1	0
1	0	0	0	0	0	0	0	1	1	0	0	0	0	0	0
1	0	0	0	0	0	0	0	1	1	0	0	0	1	0	0
1	0	0	0	0	0	0	0	1	1	0	0	1	0	1	0
1	0	0	0	0	0	0	0	1	1	0	0	1	0	0	0
1	0	0	0	0	0	0	0	1	1	0	0	1	1	0	0
1	0	0	0	0	0	0	0	1	1	0	1	0	0	1	0
1	0	0	0	0	0	0	0	1	1	0	1	0	0	0	0
1	0	0	0	0	0	0	0	1	1	0	1	0	1	0	0
1	0	0	0	0	0	0	0	1	0	1	0	0	0	1	0
1	0	0	0	0	0	0	0	1	0	1	0	0	0	0	0
1	0	0	0	0	0	0	0	1	0	1	0	0	1	0	0
1	0	0	0	0	0	0	0	1	0	1	0	1	0	1	0
1	0	0	0	0	0	0	0	1	0	1	0	1	0	0	0
1	0	0	0	0	0	0	0	1	0	1	0	1	1	0	0
1	0	0	0	0	0	0	0	1	0	1	1	0	0	1	0
1	0	0	0	0	0	0	0	1	0	1	1	0	0	0	0
1	0	0	0	0	0	0	0	1	0	1	1	0	1	0	0
1	0	0	0	0	0	0	0	1	0	0	0	0	0	1	0
1	0	0	0	0	0	0	0	1	0	0	0	0	0	0	0
1	0	0	0	0	0	0	0	1	0	0	0	0	1	0	0
1	0	0	0	0	0	0	0	1	0	0	0	1	0	1	0
1	0	0	0	0	0	0	0	1	0	0	0	1	0	0	0
1	0	0	0	0	0	0	0	1	0	0	0	1	1	0	0
1	0	0	0	0	0	0	0	1	0	0	1	0	0	1	0
1	0	0	0	0	0	0	0	1	0	0	1	0	0	0	0
1	0	0	0	0	0	0	0	1	0	0	1	0	1	0	0
1	0	0	0	0	0	0	0	0	1	0	0	0	0	1	0
1	0	0	0	0	0	0	0	0	1	0	0	0	0	0	0
1	0	0	0	0	0	0	0	0	1	0	0	0	1	0	0
1	0	0	0	0	0	0	0	0	1	0	0	1	0	1	0
1	0	0	0	0	0	0	0	0	1	0	0	1	0	0	0
1	0	0	0	0	0	0	0	0	1	0	0	1	1	0	0
1	0	0	0	0	0	0	0	0	1	0	1	0	0	1	0
1	0	0	0	0	0	0	0	0	1	0	1	0	0	0	0
1	0	0	0	0	0	0	0	0	1	0	1	0	1	0	0
1	0	0	0	0	0	0	0	0	0	1	0	0	0	1	0
1	0	0	0	0	0	0	0	0	0	1	0	0	0	0	0
1	0	0	0	0	0	0	0	0	0	1	0	0	1	0	0
1	0	0	0	0	0	0	0	0	0	1	0	1	0	1	0
1	0	0	0	0	0	0	0	0	0	1	0	1	0	0	0
1	0	0	0	0	0	0	0	0	0	1	0	1	1	0	0
1	0	0	0	0	0	0	0	0	0	1	1	0	0	1	0
1	0	0	0	0	0	0	0	0	0	1	1	0	0	0	0
1	0	0	0	0	0	0	0	0	0	1	1	0	1	0	0
1	0	0	0	0	0	0	0	0	0	0	0	0	0	1	0
1	0	0	0	0	0	0	0	0	0	0	0	0	0	0	0
1	0	0	0	0	0	0	0	0	0	0	0	0	1	0	0
1	0	0	0	0	0	0	0	0	0	0	0	1	0	1	0
1	0	0	0	0	0	0	0	0	0	0	0	1	0	0	0
1	0	0	0	0	0	0	0	0	0	0	0	1	1	0	0
1	0	0	0	0	0	0	0	0	0	0	1	0	0	1	0
1	0	0	0	0	0	0	0	0	0	0	1	0	0	0	0
1	0	0	0	0	0	0	0	0	0	0	1	0	1	0	0
1	0	0	1	0	0	1	0	0	1	0	0	0	0	1	0
1	0	0	1	0	0	1	0	0	1	0	0	0	0	0	0
1	0	0	1	0	0	1	0	0	1	0	0	0	1	0	0
1	0	0	1	0	0	1	0	0	1	0	0	1	0	1	0
1	0	0	1	0	0	1	0	0	1	0	0	1	0	0	0
1	0	0	1	0	0	1	0	0	1	0	0	1	1	0	0
1	0	0	1	0	0	1	0	0	1	0	1	0	0	1	0
1	0	0	1	0	0	1	0	0	1	0	1	0	0	0	0
1	0	0	1	0	0	1	0	0	1	0	1	0	1	0	0
1	0	0	1	0	0	1	0	0	0	1	0	0	0	1	0
1	0	0	1	0	0	1	0	0	0	1	0	0	0	0	0
1	0	0	1	0	0	1	0	0	0	1	0	0	1	0	1
1	0	0	1	0	0	1	0	0	0	1	0	1	0	1	0
1	0	0	1	0	0	1	0	0	0	1	0	1	0	0	0
1	0	0	1	0	0	1	0	0	0	1	0	1	1	0	1
1	0	0	1	0	0	1	0	0	0	1	1	0	0	1	0
1	0	0	1	0	0	1	0	0	0	1	1	0	0	0	1
1	0	0	1	0	0	1	0	0	0	1	1	0	1	0	1
1	0	0	1	0	0	1	0	0	0	0	0	0	0	1	0
1	0	0	1	0	0	1	0	0	0	0	0	0	0	0	0
1	0	0	1	0	0	1	0	0	0	0	0	0	1	0	0
1	0	0	1	0	0	1	0	0	0	0	0	1	0	1	0
1	0	0	1	0	0	1	0	0	0	0	0	1	0	0	0
1	0	0	1	0	0	1	0	0	0	0	0	1	1	0	1
1	0	0	1	0	0	1	0	0	0	0	1	0	0	1	0
1	0	0	1	0	0	1	0	0	0	0	1	0	0	0	1
1	0	0	1	0	0	1	0	0	0	0	1	0	1	0	1
1	0	0	1	0	0	0	1	0	1	0	0	0	0	1	0
1	0	0	1	0	0	0	1	0	1	0	0	0	0	0	0
1	0	0	1	0	0	0	1	0	1	0	0	0	1	0	0
1	0	0	1	0	0	0	1	0	1	0	0	1	0	1	0
1	0	0	1	0	0	0	1	0	1	0	0	1	0	0	0
1	0	0	1	0	0	0	1	0	1	0	0	1	1	0	0
1	0	0	1	0	0	0	1	0	1	0	1	0	0	1	0
1	0	0	1	0	0	0	1	0	1	0	1	0	0	0	0
1	0	0	1	0	0	0	1	0	1	0	1	0	1	0	0
1	0	0	1	0	0	0	1	0	0	1	0	0	0	1	0
1	0	0	1	0	0	0	1	0	0	1	0	0	0	0	0
1	0	0	1	0	0	0	1	0	0	1	0	0	1	0	1
1	0	0	1	0	0	0	1	0	0	1	0	1	0	1	0
1	0	0	1	0	0	0	1	0	0	1	0	1	0	0	0
1	0	0	1	0	0	0	1	0	0	1	0	1	1	0	1
1	0	0	1	0	0	0	1	0	0	1	1	0	0	1	0
1	0	0	1	0	0	0	1	0	0	1	1	0	0	0	1
1	0	0	1	0	0	0	1	0	0	1	1	0	1	0	1
1	0	0	1	0	0	0	1	0	0	0	0	0	0	1	0
1	0	0	1	0	0	0	1	0	0	0	0	0	0	0	0
1	0	0	1	0	0	0	1	0	0	0	0	0	1	0	1
1	0	0	1	0	0	0	1	0	0	0	0	1	0	1	0
1	0	0	1	0	0	0	1	0	0	0	0	1	0	0	1
1	0	0	1	0	0	0	1	0	0	0	0	1	1	0	1
1	0	0	1	0	0	0	1	0	0	0	1	0	0	1	0
1	0	0	1	0	0	0	1	0	0	0	1	0	0	0	1
1	0	0	1	0	0	0	1	0	0	0	1	0	1	0	1
1	0	0	1	0	0	0	0	1	1	0	0	0	0	1	0
1	0	0	1	0	0	0	0	1	1	0	0	0	0	0	0
1	0	0	1	0	0	0	0	1	1	0	0	0	1	0	0
1	0	0	1	0	0	0	0	1	1	0	0	1	0	1	0
1	0	0	1	0	0	0	0	1	1	0	0	1	0	0	0
1	0	0	1	0	0	0	0	1	1	0	0	1	1	0	0
1	0	0	1	0	0	0	0	1	1	0	1	0	0	1	0
1	0	0	1	0	0	0	0	1	1	0	1	0	0	0	0
1	0	0	1	0	0	0	0	1	1	0	1	0	1	0	0
1	0	0	1	0	0	0	0	1	0	1	0	0	0	1	0
1	0	0	1	0	0	0	0	1	0	1	0	0	0	0	0
1	0	0	1	0	0	0	0	1	0	1	0	0	1	0	1
1	0	0	1	0	0	0	0	1	0	1	0	1	0	1	0
1	0	0	1	0	0	0	0	1	0	1	0	1	0	0	1
1	0	0	1	0	0	0	0	1	0	1	0	1	1	0	1
1	0	0	1	0	0	0	0	1	0	1	1	0	0	1	0
1	0	0	1	0	0	0	0	1	0	1	1	0	0	0	1
1	0	0	1	0	0	0	0	1	0	1	1	0	1	0	1
1	0	0	1	0	0	0	0	1	0	0	0	0	0	1	0
1	0	0	1	0	0	0	0	1	0	0	0	0	0	0	0
1	0	0	1	0	0	0	0	1	0	0	0	0	1	0	1
1	0	0	1	0	0	0	0	1	0	0	0	1	0	1	0
1	0	0	1	0	0	0	0	1	0	0	0	1	0	0	1
1	0	0	1	0	0	0	0	1	0	0	0	1	1	0	1
1	0	0	1	0	0	0	0	1	0	0	1	0	0	1	0
1	0	0	1	0	0	0	0	1	0	0	1	0	0	0	1
1	0	0	1	0	0	0	0	1	0	0	1	0	1	0	1
1	0	0	1	0	0	0	0	0	1	0	0	0	0	1	0
1	0	0	1	0	0	0	0	0	1	0	0	0	0	0	0
1	0	0	1	0	0	0	0	0	1	0	0	0	1	0	0
1	0	0	1	0	0	0	0	0	1	0	0	1	0	1	0
1	0	0	1	0	0	0	0	0	1	0	0	1	0	0	0
1	0	0	1	0	0	0	0	0	1	0	0	1	1	0	0
1	0	0	1	0	0	0	0	0	1	0	1	0	0	1	0
1	0	0	1	0	0	0	0	0	1	0	1	0	0	0	0
1	0	0	1	0	0	0	0	0	1	0	1	0	1	0	0
1	0	0	1	0	0	0	0	0	0	1	0	0	0	1	0
1	0	0	1	0	0	0	0	0	0	1	0	0	0	0	0
1	0	0	1	0	0	0	0	0	0	1	0	0	1	0	1
1	0	0	1	0	0	0	0	0	0	1	0	1	0	1	0
1	0	0	1	0	0	0	0	0	0	1	0	1	0	0	1
1	0	0	1	0	0	0	0	0	0	1	0	1	1	0	1
1	0	0	1	0	0	0	0	0	0	1	1	0	0	1	0
1	0	0	1	0	0	0	0	0	0	1	1	0	0	0	1
1	0	0	1	0	0	0	0	0	0	1	1	0	1	0	1
1	0	0	1	0	0	0	0	0	0	0	0	0	0	1	0
1	0	0	1	0	0	0	0	0	0	0	0	0	0	0	0
1	0	0	1	0	0	0	0	0	0	0	0	0	1	0	1
1	0	0	1	0	0	0	0	0	0	0	0	1	0	1	0
1	0	0	1	0	0	0	0	0	0	0	0	1	0	0	1
1	0	0	1	0	0	0	0	0	0	0	0	1	1	0	1
1	0	0	1	0	0	0	0	0	0	0	1	0	0	1	0
1	0	0	1	0	0	0	0	0	0	0	1	0	0	0	1
1	0	0	1	0	0	0	0	0	0	0	1	0	1	0	1
1	0	0	0	0	1	1	0	0	1	0	0	0	0	1	0
1	0	0	0	0	1	1	0	0	1	0	0	0	0	0	0
1	0	0	0	0	1	1	0	0	1	0	0	0	1	0	0
1	0	0	0	0	1	1	0	0	1	0	0	1	0	1	0
1	0	0	0	0	1	1	0	0	1	0	0	1	0	0	0
1	0	0	0	0	1	1	0	0	1	0	0	1	1	0	0
1	0	0	0	0	1	1	0	0	1	0	1	0	0	1	0
1	0	0	0	0	1	1	0	0	1	0	1	0	0	0	0
1	0	0	0	0	1	1	0	0	1	0	1	0	1	0	0
1	0	0	0	0	1	1	0	0	0	1	0	0	0	1	0
1	0	0	0	0	1	1	0	0	0	1	0	0	0	0	0
1	0	0	0	0	1	1	0	0	0	1	0	0	1	0	1
1	0	0	0	0	1	1	0	0	0	1	0	1	0	1	0
1	0	0	0	0	1	1	0	0	0	1	0	1	0	0	0
1	0	0	0	0	1	1	0	0	0	1	0	1	1	0	1
1	0	0	0	0	1	1	0	0	0	1	1	0	0	1	0
1	0	0	0	0	1	1	0	0	0	1	1	0	0	0	1
1	0	0	0	0	1	1	0	0	0	1	1	0	1	0	1
1	0	0	0	0	1	1	0	0	0	0	0	0	0	1	0
1	0	0	0	0	1	1	0	0	0	0	0	0	0	0	0
1	0	0	0	0	1	1	0	0	0	0	0	0	1	0	0
1	0	0	0	0	1	1	0	0	0	0	0	1	0	1	0
1	0	0	0	0	1	1	0	0	0	0	0	1	0	0	0
1	0	0	0	0	1	1	0	0	0	0	0	1	1	0	1
1	0	0	0	0	1	1	0	0	0	0	1	0	0	1	0
1	0	0	0	0	1	1	0	0	0	0	1	0	0	0	1
1	0	0	0	0	1	1	0	0	0	0	1	0	1	0	1
1	0	0	0	0	1	0	1	0	1	0	0	0	0	1	0
1	0	0	0	0	1	0	1	0	1	0	0	0	0	0	0
1	0	0	0	0	1	0	1	0	1	0	0	0	1	0	0
1	0	0	0	0	1	0	1	0	1	0	0	1	0	1	0
1	0	0	0	0	1	0	1	0	1	0	0	1	0	0	0
1	0	0	0	0	1	0	1	0	1	0	0	1	1	0	0
1	0	0	0	0	1	0	1	0	1	0	1	0	0	1	0
1	0	0	0	0	1	0	1	0	1	0	1	0	0	0	0
1	0	0	0	0	1	0	1	0	1	0	1	0	1	0	0
1	0	0	0	0	1	0	1	0	0	1	0	0	0	1	0
1	0	0	0	0	1	0	1	0	0	1	0	0	0	0	0
1	0	0	0	0	1	0	1	0	0	1	0	0	1	0	1
1	0	0	0	0	1	0	1	0	0	1	0	1	0	1	0
1	0	0	0	0	1	0	1	0	0	1	0	1	0	0	0
1	0	0	0	0	1	0	1	0	0	1	0	1	1	0	1
1	0	0	0	0	1	0	1	0	0	1	1	0	0	1	0
1	0	0	0	0	1	0	1	0	0	1	1	0	0	0	1
1	0	0	0	0	1	0	1	0	0	1	1	0	1	0	1
1	0	0	0	0	1	0	1	0	0	0	0	0	0	1	0
1	0	0	0	0	1	0	1	0	0	0	0	0	0	0	0
1	0	0	0	0	1	0	1	0	0	0	0	0	1	0	1
1	0	0	0	0	1	0	1	0	0	0	0	1	0	1	0
1	0	0	0	0	1	0	1	0	0	0	0	1	0	0	1
1	0	0	0	0	1	0	1	0	0	0	0	1	1	0	1
1	0	0	0	0	1	0	1	0	0	0	1	0	0	1	0
1	0	0	0	0	1	0	1	0	0	0	1	0	0	0	1
1	0	0	0	0	1	0	1	0	0	0	1	0	1	0	1
1	0	0	0	0	1	0	0	1	1	0	0	0	0	1	0
1	0	0	0	0	1	0	0	1	1	0	0	0	0	0	0
1	0	0	0	0	1	0	0	1	1	0	0	0	1	0	0
1	0	0	0	0	1	0	0	1	1	0	0	1	0	1	0
1	0	0	0	0	1	0	0	1	1	0	0	1	0	0	0
1	0	0	0	0	1	0	0	1	1	0	0	1	1	0	0
1	0	0	0	0	1	0	0	1	1	0	1	0	0	1	0
1	0	0	0	0	1	0	0	1	1	0	1	0	0	0	0
1	0	0	0	0	1	0	0	1	1	0	1	0	1	0	0
1	0	0	0	0	1	0	0	1	0	1	0	0	0	1	0
1	0	0	0	0	1	0	0	1	0	1	0	0	0	0	0
1	0	0	0	0	1	0	0	1	0	1	0	0	1	0	1
1	0	0	0	0	1	0	0	1	0	1	0	1	0	1	0
1	0	0	0	0	1	0	0	1	0	1	0	1	0	0	1
1	0	0	0	0	1	0	0	1	0	1	0	1	1	0	1
1	0	0	0	0	1	0	0	1	0	1	1	0	0	1	0
1	0	0	0	0	1	0	0	1	0	1	1	0	0	0	1
1	0	0	0	0	1	0	0	1	0	1	1	0	1	0	1
1	0	0	0	0	1	0	0	1	0	0	0	0	0	1	0
1	0	0	0	0	1	0	0	1	0	0	0	0	0	0	0
1	0	0	0	0	1	0	0	1	0	0	0	0	1	0	1
1	0	0	0	0	1	0	0	1	0	0	0	1	0	1	0
1	0	0	0	0	1	0	0	1	0	0	0	1	0	0	1
1	0	0	0	0	1	0	0	1	0	0	0	1	1	0	1
1	0	0	0	0	1	0	0	1	0	0	1	0	0	1	0
1	0	0	0	0	1	0	0	1	0	0	1	0	0	0	1
1	0	0	0	0	1	0	0	1	0	0	1	0	1	0	1
1	0	0	0	0	1	0	0	0	1	0	0	0	0	1	0
1	0	0	0	0	1	0	0	0	1	0	0	0	0	0	0
1	0	0	0	0	1	0	0	0	1	0	0	0	1	0	0
1	0	0	0	0	1	0	0	0	1	0	0	1	0	1	0
1	0	0	0	0	1	0	0	0	1	0	0	1	0	0	0
1	0	0	0	0	1	0	0	0	1	0	0	1	1	0	0
1	0	0	0	0	1	0	0	0	1	0	1	0	0	1	0
1	0	0	0	0	1	0	0	0	1	0	1	0	0	0	0
1	0	0	0	0	1	0	0	0	1	0	1	0	1	0	0
1	0	0	0	0	1	0	0	0	0	1	0	0	0	1	0
1	0	0	0	0	1	0	0	0	0	1	0	0	0	0	0
1	0	0	0	0	1	0	0	0	0	1	0	0	1	0	1
1	0	0	0	0	1	0	0	0	0	1	0	1	0	1	0
1	0	0	0	0	1	0	0	0	0	1	0	1	0	0	1
1	0	0	0	0	1	0	0	0	0	1	0	1	1	0	1
1	0	0	0	0	1	0	0	0	0	1	1	0	0	1	0
1	0	0	0	0	1	0	0	0	0	1	1	0	0	0	1
1	0	0	0	0	1	0	0	0	0	1	1	0	1	0	1
1	0	0	0	0	1	0	0	0	0	0	0	0	0	1	0
1	0	0	0	0	1	0	0	0	0	0	0	0	0	0	0
1	0	0	0	0	1	0	0	0	0	0	0	0	1	0	1
1	0	0	0	0	1	0	0	0	0	0	0	1	0	1	0
1	0	0	0	0	1	0	0	0	0	0	0	1	0	0	1
1	0	0	0	0	1	0	0	0	0	0	0	1	1	0	1
1	0	0	0	0	1	0	0	0	0	0	1	0	0	1	0
1	0	0	0	0	1	0	0	0	0	0	1	0	0	0	1
1	0	0	0	0	1	0	0	0	0	0	1	0	1	0	1
1	0	0	0	1	0	1	0	0	1	0	0	0	0	1	0
1	0	0	0	1	0	1	0	0	1	0	0	0	0	0	0
1	0	0	0	1	0	1	0	0	1	0	0	0	1	0	0
1	0	0	0	1	0	1	0	0	1	0	0	1	0	1	0
1	0	0	0	1	0	1	0	0	1	0	0	1	0	0	0
1	0	0	0	1	0	1	0	0	1	0	0	1	1	0	0
1	0	0	0	1	0	1	0	0	1	0	1	0	0	1	0
1	0	0	0	1	0	1	0	0	1	0	1	0	0	0	0
1	0	0	0	1	0	1	0	0	1	0	1	0	1	0	0
1	0	0	0	1	0	1	0	0	0	1	0	0	0	1	0
1	0	0	0	1	0	1	0	0	0	1	0	0	0	0	0
1	0	0	0	1	0	1	0	0	0	1	0	0	1	0	1
1	0	0	0	1	0	1	0	0	0	1	0	1	0	1	0
1	0	0	0	1	0	1	0	0	0	1	0	1	0	0	0
1	0	0	0	1	0	1	0	0	0	1	0	1	1	0	1
1	0	0	0	1	0	1	0	0	0	1	1	0	0	1	0
1	0	0	0	1	0	1	0	0	0	1	1	0	0	0	1
1	0	0	0	1	0	1	0	0	0	1	1	0	1	0	1
1	0	0	0	1	0	1	0	0	0	0	0	0	0	1	0
1	0	0	0	1	0	1	0	0	0	0	0	0	0	0	0
1	0	0	0	1	0	1	0	0	0	0	0	0	1	0	0
1	0	0	0	1	0	1	0	0	0	0	0	1	0	1	0
1	0	0	0	1	0	1	0	0	0	0	0	1	0	0	0
1	0	0	0	1	0	1	0	0	0	0	0	1	1	0	1
1	0	0	0	1	0	1	0	0	0	0	1	0	0	1	0
1	0	0	0	1	0	1	0	0	0	0	1	0	0	0	1
1	0	0	0	1	0	1	0	0	0	0	1	0	1	0	1
1	0	0	0	1	0	0	1	0	1	0	0	0	0	1	0
1	0	0	0	1	0	0	1	0	1	0	0	0	0	0	0
1	0	0	0	1	0	0	1	0	1	0	0	0	1	0	0
1	0	0	0	1	0	0	1	0	1	0	0	1	0	1	0
1	0	0	0	1	0	0	1	0	1	0	0	1	0	0	0
1	0	0	0	1	0	0	1	0	1	0	0	1	1	0	0
1	0	0	0	1	0	0	1	0	1	0	1	0	0	1	0
1	0	0	0	1	0	0	1	0	1	0	1	0	0	0	0
1	0	0	0	1	0	0	1	0	1	0	1	0	1	0	0
1	0	0	0	1	0	0	1	0	0	1	0	0	0	1	0
1	0	0	0	1	0	0	1	0	0	1	0	0	0	0	0
1	0	0	0	1	0	0	1	0	0	1	0	0	1	0	1
1	0	0	0	1	0	0	1	0	0	1	0	1	0	1	0
1	0	0	0	1	0	0	1	0	0	1	0	1	0	0	0
1	0	0	0	1	0	0	1	0	0	1	0	1	1	0	1
1	0	0	0	1	0	0	1	0	0	1	1	0	0	1	0
1	0	0	0	1	0	0	1	0	0	1	1	0	0	0	1
1	0	0	0	1	0	0	1	0	0	1	1	0	1	0	1
1	0	0	0	1	0	0	1	0	0	0	0	0	0	1	0
1	0	0	0	1	0	0	1	0	0	0	0	0	0	0	0
1	0	0	0	1	0	0	1	0	0	0	0	0	1	0	1
1	0	0	0	1	0	0	1	0	0	0	0	1	0	1	0
1	0	0	0	1	0	0	1	0	0	0	0	1	0	0	1
1	0	0	0	1	0	0	1	0	0	0	0	1	1	0	1
1	0	0	0	1	0	0	1	0	0	0	1	0	0	1	0
1	0	0	0	1	0	0	1	0	0	0	1	0	0	0	1
1	0	0	0	1	0	0	1	0	0	0	1	0	1	0	1
1	0	0	0	1	0	0	0	1	1	0	0	0	0	1	0
1	0	0	0	1	0	0	0	1	1	0	0	0	0	0	0
1	0	0	0	1	0	0	0	1	1	0	0	0	1	0	0
1	0	0	0	1	0	0	0	1	1	0	0	1	0	1	0
1	0	0	0	1	0	0	0	1	1	0	0	1	0	0	0
1	0	0	0	1	0	0	0	1	1	0	0	1	1	0	0
1	0	0	0	1	0	0	0	1	1	0	1	0	0	1	0
1	0	0	0	1	0	0	0	1	1	0	1	0	0	0	0
1	0	0	0	1	0	0	0	1	1	0	1	0	1	0	0
1	0	0	0	1	0	0	0	1	0	1	0	0	0	1	0
1	0	0	0	1	0	0	0	1	0	1	0	0	0	0	0
1	0	0	0	1	0	0	0	1	0	1	0	0	1	0	1
1	0	0	0	1	0	0	0	1	0	1	0	1	0	1	0
1	0	0	0	1	0	0	0	1	0	1	0	1	0	0	1
1	0	0	0	1	0	0	0	1	0	1	0	1	1	0	1
1	0	0	0	1	0	0	0	1	0	1	1	0	0	1	0
1	0	0	0	1	0	0	0	1	0	1	1	0	0	0	1
1	0	0	0	1	0	0	0	1	0	1	1	0	1	0	1
1	0	0	0	1	0	0	0	1	0	0	0	0	0	1	0
1	0	0	0	1	0	0	0	1	0	0	0	0	0	0	0
1	0	0	0	1	0	0	0	1	0	0	0	0	1	0	1
1	0	0	0	1	0	0	0	1	0	0	0	1	0	1	0
1	0	0	0	1	0	0	0	1	0	0	0	1	0	0	1
1	0	0	0	1	0	0	0	1	0	0	0	1	1	0	1
1	0	0	0	1	0	0	0	1	0	0	1	0	0	1	0
1	0	0	0	1	0	0	0	1	0	0	1	0	0	0	1
1	0	0	0	1	0	0	0	1	0	0	1	0	1	0	1
1	0	0	0	1	0	0	0	0	1	0	0	0	0	1	0
1	0	0	0	1	0	0	0	0	1	0	0	0	0	0	0
1	0	0	0	1	0	0	0	0	1	0	0	0	1	0	0
1	0	0	0	1	0	0	0	0	1	0	0	1	0	1	0
1	0	0	0	1	0	0	0	0	1	0	0	1	0	0	0
1	0	0	0	1	0	0	0	0	1	0	0	1	1	0	0
1	0	0	0	1	0	0	0	0	1	0	1	0	0	1	0
1	0	0	0	1	0	0	0	0	1	0	1	0	0	0	0
1	0	0	0	1	0	0	0	0	1	0	1	0	1	0	0
1	0	0	0	1	0	0	0	0	0	1	0	0	0	1	0
1	0	0	0	1	0	0	0	0	0	1	0	0	0	0	0
1	0	0	0	1	0	0	0	0	0	1	0	0	1	0	1
1	0	0	0	1	0	0	0	0	0	1	0	1	0	1	0
1	0	0	0	1	0	0	0	0	0	1	0	1	0	0	1
1	0	0	0	1	0	0	0	0	0	1	0	1	1	0	1
1	0	0	0	1	0	0	0	0	0	1	1	0	0	1	0
1	0	0	0	1	0	0	0	0	0	1	1	0	0	0	1
1	0	0	0	1	0	0	0	0	0	1	1	0	1	0	1
1	0	0	0	1	0	0	0	0	0	0	0	0	0	1	0
1	0	0	0	1	0	0	0	0	0	0	0	0	0	0	0
1	0	0	0	1	0	0	0	0	0	0	0	0	1	0	1
1	0	0	0	1	0	0	0	0	0	0	0	1	0	1	0
1	0	0	0	1	0	0	0	0	0	0	0	1	0	0	1
1	0	0	0	1	0	0	0	0	0	0	0	1	1	0	1
1	0	0	0	1	0	0	0	0	0	0	1	0	0	1	0
1	0	0	0	1	0	0	0	0	0	0	1	0	0	0	1
1	0	0	0	1	0	0	0	0	0	0	1	0	1	0	1
0	0	1	0	0	0	1	0	0	1	0	0	0	0	1	0
0	0	1	0	0	0	1	0	0	1	0	0	0	0	0	0
0	0	1	0	0	0	1	0	0	1	0	0	0	1	0	0
0	0	1	0	0	0	1	0	0	1	0	0	1	0	1	0
0	0	1	0	0	0	1	0	0	1	0	0	1	0	0	0
0	0	1	0	0	0	1	0	0	1	0	0	1	1	0	0
0	0	1	0	0	0	1	0	0	1	0	1	0	0	1	0
0	0	1	0	0	0	1	0	0	1	0	1	0	0	0	0
0	0	1	0	0	0	1	0	0	1	0	1	0	1	0	0
0	0	1	0	0	0	1	0	0	0	1	0	0	0	1	0
0	0	1	0	0	0	1	0	0	0	1	0	0	0	0	0
0	0	1	0	0	0	1	0	0	0	1	0	0	1	0	1
0	0	1	0	0	0	1	0	0	0	1	0	1	0	1	0
0	0	1	0	0	0	1	0	0	0	1	0	1	0	0	0
0	0	1	0	0	0	1	0	0	0	1	0	1	1	0	1
0	0	1	0	0	0	1	0	0	0	1	1	0	0	1	0
0	0	1	0	0	0	1	0	0	0	1	1	0	0	0	1
0	0	1	0	0	0	1	0	0	0	1	1	0	1	0	1
0	0	1	0	0	0	1	0	0	0	0	0	0	0	1	0
0	0	1	0	0	0	1	0	0	0	0	0	0	0	0	0
0	0	1	0	0	0	1	0	0	0	0	0	0	1	0	0
0	0	1	0	0	0	1	0	0	0	0	0	1	0	1	0
0	0	1	0	0	0	1	0	0	0	0	0	1	0	0	0
0	0	1	0	0	0	1	0	0	0	0	0	1	1	0	1
0	0	1	0	0	0	1	0	0	0	0	1	0	0	1	0
0	0	1	0	0	0	1	0	0	0	0	1	0	0	0	1
0	0	1	0	0	0	1	0	0	0	0	1	0	1	0	1
0	0	1	0	0	0	0	1	0	1	0	0	0	0	1	0
0	0	1	0	0	0	0	1	0	1	0	0	0	0	0	0
0	0	1	0	0	0	0	1	0	1	0	0	0	1	0	0
0	0	1	0	0	0	0	1	0	1	0	0	1	0	1	0
0	0	1	0	0	0	0	1	0	1	0	0	1	0	0	0
0	0	1	0	0	0	0	1	0	1	0	0	1	1	0	0
0	0	1	0	0	0	0	1	0	1	0	1	0	0	1	0
0	0	1	0	0	0	0	1	0	1	0	1	0	0	0	0
0	0	1	0	0	0	0	1	0	1	0	1	0	1	0	0
0	0	1	0	0	0	0	1	0	0	1	0	0	0	1	0
0	0	1	0	0	0	0	1	0	0	1	0	0	0	0	0
0	0	1	0	0	0	0	1	0	0	1	0	0	1	0	1
0	0	1	0	0	0	0	1	0	0	1	0	1	0	1	0
0	0	1	0	0	0	0	1	0	0	1	0	1	0	0	0
0	0	1	0	0	0	0	1	0	0	1	0	1	1	0	1
0	0	1	0	0	0	0	1	0	0	1	1	0	0	1	0
0	0	1	0	0	0	0	1	0	0	1	1	0	0	0	1
0	0	1	0	0	0	0	1	0	0	1	1	0	1	0	1
0	0	1	0	0	0	0	1	0	0	0	0	0	0	1	0
0	0	1	0	0	0	0	1	0	0	0	0	0	0	0	0
0	0	1	0	0	0	0	1	0	0	0	0	0	1	0	1
0	0	1	0	0	0	0	1	0	0	0	0	1	0	1	0
0	0	1	0	0	0	0	1	0	0	0	0	1	0	0	1
0	0	1	0	0	0	0	1	0	0	0	0	1	1	0	1
0	0	1	0	0	0	0	1	0	0	0	1	0	0	1	0
0	0	1	0	0	0	0	1	0	0	0	1	0	0	0	1
0	0	1	0	0	0	0	1	0	0	0	1	0	1	0	1
0	0	1	0	0	0	0	0	1	1	0	0	0	0	1	0
0	0	1	0	0	0	0	0	1	1	0	0	0	0	0	0
0	0	1	0	0	0	0	0	1	1	0	0	0	1	0	0
0	0	1	0	0	0	0	0	1	1	0	0	1	0	1	0
0	0	1	0	0	0	0	0	1	1	0	0	1	0	0	0
0	0	1	0	0	0	0	0	1	1	0	0	1	1	0	0
0	0	1	0	0	0	0	0	1	1	0	1	0	0	1	0
0	0	1	0	0	0	0	0	1	1	0	1	0	0	0	0
0	0	1	0	0	0	0	0	1	1	0	1	0	1	0	0
0	0	1	0	0	0	0	0	1	0	1	0	0	0	1	0
0	0	1	0	0	0	0	0	1	0	1	0	0	0	0	0
0	0	1	0	0	0	0	0	1	0	1	0	0	1	0	1
0	0	1	0	0	0	0	0	1	0	1	0	1	0	1	0
0	0	1	0	0	0	0	0	1	0	1	0	1	0	0	1
0	0	1	0	0	0	0	0	1	0	1	0	1	1	0	1
0	0	1	0	0	0	0	0	1	0	1	1	0	0	1	0
0	0	1	0	0	0	0	0	1	0	1	1	0	0	0	1
0	0	1	0	0	0	0	0	1	0	1	1	0	1	0	1
0	0	1	0	0	0	0	0	1	0	0	0	0	0	1	0
0	0	1	0	0	0	0	0	1	0	0	0	0	0	0	0
0	0	1	0	0	0	0	0	1	0	0	0	0	1	0	1
0	0	1	0	0	0	0	0	1	0	0	0	1	0	1	0
0	0	1	0	0	0	0	0	1	0	0	0	1	0	0	1
0	0	1	0	0	0	0	0	1	0	0	0	1	1	0	1
0	0	1	0	0	0	0	0	1	0	0	1	0	0	1	0
0	0	1	0	0	0	0	0	1	0	0	1	0	0	0	1
0	0	1	0	0	0	0	0	1	0	0	1	0	1	0	1
0	0	1	0	0	0	0	0	0	1	0	0	0	0	1	0
0	0	1	0	0	0	0	0	0	1	0	0	0	0	0	0
0	0	1	0	0	0	0	0	0	1	0	0	0	1	0	0
0	0	1	0	0	0	0	0	0	1	0	0	1	0	1	0
0	0	1	0	0	0	0	0	0	1	0	0	1	0	0	0
0	0	1	0	0	0	0	0	0	1	0	0	1	1	0	0
0	0	1	0	0	0	0	0	0	1	0	1	0	0	1	0
0	0	1	0	0	0	0	0	0	1	0	1	0	0	0	0
0	0	1	0	0	0	0	0	0	1	0	1	0	1	0	0
0	0	1	0	0	0	0	0	0	0	1	0	0	0	1	0
0	0	1	0	0	0	0	0	0	0	1	0	0	0	0	0
0	0	1	0	0	0	0	0	0	0	1	0	0	1	0	1
0	0	1	0	0	0	0	0	0	0	1	0	1	0	1	0
0	0	1	0	0	0	0	0	0	0	1	0	1	0	0	1
0	0	1	0	0	0	0	0	0	0	1	0	1	1	0	1
0	0	1	0	0	0	0	0	0	0	1	1	0	0	1	0
0	0	1	0	0	0	0	0	0	0	1	1	0	0	0	1
0	0	1	0	0	0	0	0	0	0	1	1	0	1	0	1
0	0	1	0	0	0	0	0	0	0	0	0	0	0	1	0
0	0	1	0	0	0	0	0	0	0	0	0	0	0	0	0
0	0	1	0	0	0	0	0	0	0	0	0	0	1	0	1
0	0	1	0	0	0	0	0	0	0	0	0	1	0	1	0
0	0	1	0	0	0	0	0	0	0	0	0	1	0	0	1
0	0	1	0	0	0	0	0	0	0	0	0	1	1	0	1
0	0	1	0	0	0	0	0	0	0	0	1	0	0	1	0
0	0	1	0	0	0	0	0	0	0	0	1	0	0	0	1
0	0	1	0	0	0	0	0	0	0	0	1	0	1	0	1
0	0	1	1	0	0	1	0	0	1	0	0	0	0	1	0
0	0	1	1	0	0	1	0	0	1	0	0	0	0	0	0
0	0	1	1	0	0	1	0	0	1	0	0	0	1	0	0
0	0	1	1	0	0	1	0	0	1	0	0	1	0	1	0
0	0	1	1	0	0	1	0	0	1	0	0	1	0	0	0
0	0	1	1	0	0	1	0	0	1	0	0	1	1	0	0
0	0	1	1	0	0	1	0	0	1	0	1	0	0	1	0
0	0	1	1	0	0	1	0	0	1	0	1	0	0	0	0
0	0	1	1	0	0	1	0	0	1	0	1	0	1	0	0
0	0	1	1	0	0	1	0	0	0	1	0	0	0	1	0
0	0	1	1	0	0	1	0	0	0	1	0	0	0	0	0
0	0	1	1	0	0	1	0	0	0	1	0	0	1	0	1
0	0	1	1	0	0	1	0	0	0	1	0	1	0	1	0
0	0	1	1	0	0	1	0	0	0	1	0	1	0	0	0
0	0	1	1	0	0	1	0	0	0	1	0	1	1	0	1
0	0	1	1	0	0	1	0	0	0	1	1	0	0	1	0
0	0	1	1	0	0	1	0	0	0	1	1	0	0	0	1
0	0	1	1	0	0	1	0	0	0	1	1	0	1	0	1
0	0	1	1	0	0	1	0	0	0	0	0	0	0	1	0
0	0	1	1	0	0	1	0	0	0	0	0	0	0	0	0
0	0	1	1	0	0	1	0	0	0	0	0	0	1	0	0
0	0	1	1	0	0	1	0	0	0	0	0	1	0	1	0
0	0	1	1	0	0	1	0	0	0	0	0	1	0	0	0
0	0	1	1	0	0	1	0	0	0	0	0	1	1	0	1
0	0	1	1	0	0	1	0	0	0	0	1	0	0	1	0
0	0	1	1	0	0	1	0	0	0	0	1	0	0	0	1
0	0	1	1	0	0	1	0	0	0	0	1	0	1	0	1
0	0	1	1	0	0	0	1	0	1	0	0	0	0	1	0
0	0	1	1	0	0	0	1	0	1	0	0	0	0	0	0
0	0	1	1	0	0	0	1	0	1	0	0	0	1	0	0
0	0	1	1	0	0	0	1	0	1	0	0	1	0	1	0
0	0	1	1	0	0	0	1	0	1	0	0	1	0	0	0
0	0	1	1	0	0	0	1	0	1	0	0	1	1	0	0
0	0	1	1	0	0	0	1	0	1	0	1	0	0	1	0
0	0	1	1	0	0	0	1	0	1	0	1	0	0	0	0
0	0	1	1	0	0	0	1	0	1	0	1	0	1	0	0
0	0	1	1	0	0	0	1	0	0	1	0	0	0	1	0
0	0	1	1	0	0	0	1	0	0	1	0	0	0	0	0
0	0	1	1	0	0	0	1	0	0	1	0	0	1	0	1
0	0	1	1	0	0	0	1	0	0	1	0	1	0	1	0
0	0	1	1	0	0	0	1	0	0	1	0	1	0	0	0
0	0	1	1	0	0	0	1	0	0	1	0	1	1	0	1
0	0	1	1	0	0	0	1	0	0	1	1	0	0	1	0
0	0	1	1	0	0	0	1	0	0	1	1	0	0	0	1
0	0	1	1	0	0	0	1	0	0	1	1	0	1	0	1
0	0	1	1	0	0	0	1	0	0	0	0	0	0	1	0
0	0	1	1	0	0	0	1	0	0	0	0	0	0	0	0
0	0	1	1	0	0	0	1	0	0	0	0	0	1	0	1
0	0	1	1	0	0	0	1	0	0	0	0	1	0	1	0
0	0	1	1	0	0	0	1	0	0	0	0	1	0	0	1
0	0	1	1	0	0	0	1	0	0	0	0	1	1	0	1
0	0	1	1	0	0	0	1	0	0	0	1	0	0	1	0
0	0	1	1	0	0	0	1	0	0	0	1	0	0	0	1
0	0	1	1	0	0	0	1	0	0	0	1	0	1	0	1
0	0	1	1	0	0	0	0	1	1	0	0	0	0	1	0
0	0	1	1	0	0	0	0	1	1	0	0	0	0	0	0
0	0	1	1	0	0	0	0	1	1	0	0	0	1	0	0
0	0	1	1	0	0	0	0	1	1	0	0	1	0	1	0
0	0	1	1	0	0	0	0	1	1	0	0	1	0	0	0
0	0	1	1	0	0	0	0	1	1	0	0	1	1	0	0
0	0	1	1	0	0	0	0	1	1	0	1	0	0	1	0
0	0	1	1	0	0	0	0	1	1	0	1	0	0	0	0
0	0	1	1	0	0	0	0	1	1	0	1	0	1	0	0
0	0	1	1	0	0	0	0	1	0	1	0	0	0	1	0
0	0	1	1	0	0	0	0	1	0	1	0	0	0	0	0
0	0	1	1	0	0	0	0	1	0	1	0	0	1	0	1
0	0	1	1	0	0	0	0	1	0	1	0	1	0	1	0
0	0	1	1	0	0	0	0	1	0	1	0	1	0	0	1
0	0	1	1	0	0	0	0	1	0	1	0	1	1	0	1
0	0	1	1	0	0	0	0	1	0	1	1	0	0	1	0
0	0	1	1	0	0	0	0	1	0	1	1	0	0	0	1
0	0	1	1	0	0	0	0	1	0	1	1	0	1	0	1
0	0	1	1	0	0	0	0	1	0	0	0	0	0	1	0
0	0	1	1	0	0	0	0	1	0	0	0	0	0	0	0
0	0	1	1	0	0	0	0	1	0	0	0	0	1	0	1
0	0	1	1	0	0	0	0	1	0	0	0	1	0	1	0
0	0	1	1	0	0	0	0	1	0	0	0	1	0	0	1
0	0	1	1	0	0	0	0	1	0	0	0	1	1	0	1
0	0	1	1	0	0	0	0	1	0	0	1	0	0	1	0
0	0	1	1	0	0	0	0	1	0	0	1	0	0	0	1
0	0	1	1	0	0	0	0	1	0	0	1	0	1	0	1
0	0	1	1	0	0	0	0	0	1	0	0	0	0	1	0
0	0	1	1	0	0	0	0	0	1	0	0	0	0	0	0
0	0	1	1	0	0	0	0	0	1	0	0	0	1	0	0
0	0	1	1	0	0	0	0	0	1	0	0	1	0	1	0
0	0	1	1	0	0	0	0	0	1	0	0	1	0	0	0
0	0	1	1	0	0	0	0	0	1	0	0	1	1	0	0
0	0	1	1	0	0	0	0	0	1	0	1	0	0	1	0
0	0	1	1	0	0	0	0	0	1	0	1	0	0	0	0
0	0	1	1	0	0	0	0	0	1	0	1	0	1	0	0
0	0	1	1	0	0	0	0	0	0	1	0	0	0	1	0
0	0	1	1	0	0	0	0	0	0	1	0	0	0	0	0
0	0	1	1	0	0	0	0	0	0	1	0	0	1	0	1
0	0	1	1	0	0	0	0	0	0	1	0	1	0	1	0
0	0	1	1	0	0	0	0	0	0	1	0	1	0	0	1
0	0	1	1	0	0	0	0	0	0	1	0	1	1	0	1
0	0	1	1	0	0	0	0	0	0	1	1	0	0	1	0
0	0	1	1	0	0	0	0	0	0	1	1	0	0	0	1
0	0	1	1	0	0	0	0	0	0	1	1	0	1	0	1
0	0	1	1	0	0	0	0	0	0	0	0	0	0	1	0
0	0	1	1	0	0	0	0	0	0	0	0	0	0	0	0
0	0	1	1	0	0	0	0	0	0	0	0	0	1	0	1
0	0	1	1	0	0	0	0	0	0	0	0	1	0	1	0
0	0	1	1	0	0	0	0	0	0	0	0	1	0	0	1
0	0	1	1	0	0	0	0	0	0	0	0	1	1	0	1
0	0	1	1	0	0	0	0	0	0	0	1	0	0	1	0
0	0	1	1	0	0	0	0	0	0	0	1	0	0	0	1
0	0	1	1	0	0	0	0	0	0	0	1	0	1	0	1
0	0	1	0	0	1	1	0	0	1	0	0	0	0	1	0
0	0	1	0	0	1	1	0	0	1	0	0	0	0	0	0
0	0	1	0	0	1	1	0	0	1	0	0	0	1	0	0
0	0	1	0	0	1	1	0	0	1	0	0	1	0	1	0
0	0	1	0	0	1	1	0	0	1	0	0	1	0	0	0
0	0	1	0	0	1	1	0	0	1	0	0	1	1	0	0
0	0	1	0	0	1	1	0	0	1	0	1	0	0	1	0
0	0	1	0	0	1	1	0	0	1	0	1	0	0	0	0
0	0	1	0	0	1	1	0	0	1	0	1	0	1	0	0
0	0	1	0	0	1	1	0	0	0	1	0	0	0	1	0
0	0	1	0	0	1	1	0	0	0	1	0	0	0	0	1
0	0	1	0	0	1	1	0	0	0	1	0	0	1	0	1
0	0	1	0	0	1	1	0	0	0	1	0	1	0	1	0
0	0	1	0	0	1	1	0	0	0	1	0	1	0	0	1
0	0	1	0	0	1	1	0	0	0	1	0	1	1	0	1
0	0	1	0	0	1	1	0	0	0	1	1	0	0	1	0
0	0	1	0	0	1	1	0	0	0	1	1	0	0	0	1
0	0	1	0	0	1	1	0	0	0	1	1	0	1	0	1
0	0	1	0	0	1	1	0	0	0	0	0	0	0	1	0
0	0	1	0	0	1	1	0	0	0	0	0	0	0	0	0
0	0	1	0	0	1	1	0	0	0	0	0	0	1	0	0
0	0	1	0	0	1	1	0	0	0	0	0	1	0	1	0
0	0	1	0	0	1	1	0	0	0	0	0	1	0	0	1
0	0	1	0	0	1	1	0	0	0	0	0	1	1	0	1
0	0	1	0	0	1	1	0	0	0	0	1	0	0	1	0
0	0	1	0	0	1	1	0	0	0	0	1	0	0	0	1
0	0	1	0	0	1	1	0	0	0	0	1	0	1	0	1
0	0	1	0	0	1	0	1	0	1	0	0	0	0	1	0
0	0	1	0	0	1	0	1	0	1	0	0	0	0	0	0
0	0	1	0	0	1	0	1	0	1	0	0	0	1	0	0
0	0	1	0	0	1	0	1	0	1	0	0	1	0	1	0
0	0	1	0	0	1	0	1	0	1	0	0	1	0	0	0
0	0	1	0	0	1	0	1	0	1	0	0	1	1	0	0
0	0	1	0	0	1	0	1	0	1	0	1	0	0	1	0
0	0	1	0	0	1	0	1	0	1	0	1	0	0	0	0
0	0	1	0	0	1	0	1	0	1	0	1	0	1	0	0
0	0	1	0	0	1	0	1	0	0	1	0	0	0	1	0
0	0	1	0	0	1	0	1	0	0	1	0	0	0	0	1
0	0	1	0	0	1	0	1	0	0	1	0	0	1	0	1
0	0	1	0	0	1	0	1	0	0	1	0	1	0	1	0
0	0	1	0	0	1	0	1	0	0	1	0	1	0	0	1
0	0	1	0	0	1	0	1	0	0	1	0	1	1	0	1
0	0	1	0	0	1	0	1	0	0	1	1	0	0	1	0
0	0	1	0	0	1	0	1	0	0	1	1	0	0	0	1
0	0	1	0	0	1	0	1	0	0	1	1	0	1	0	1
0	0	1	0	0	1	0	1	0	0	0	0	0	0	1	0
0	0	1	0	0	1	0	1	0	0	0	0	0	0	0	1
0	0	1	0	0	1	0	1	0	0	0	0	0	1	0	1
0	0	1	0	0	1	0	1	0	0	0	0	1	0	1	0
0	0	1	0	0	1	0	1	0	0	0	0	1	0	0	1
0	0	1	0	0	1	0	1	0	0	0	0	1	1	0	1
0	0	1	0	0	1	0	1	0	0	0	1	0	0	1	0
0	0	1	0	0	1	0	1	0	0	0	1	0	0	0	1
0	0	1	0	0	1	0	1	0	0	0	1	0	1	0	1
0	0	1	0	0	1	0	0	1	1	0	0	0	0	1	0
0	0	1	0	0	1	0	0	1	1	0	0	0	0	0	0
0	0	1	0	0	1	0	0	1	1	0	0	0	1	0	0
0	0	1	0	0	1	0	0	1	1	0	0	1	0	1	0
0	0	1	0	0	1	0	0	1	1	0	0	1	0	0	0
0	0	1	0	0	1	0	0	1	1	0	0	1	1	0	0
0	0	1	0	0	1	0	0	1	1	0	1	0	0	1	0
0	0	1	0	0	1	0	0	1	1	0	1	0	0	0	0
0	0	1	0	0	1	0	0	1	1	0	1	0	1	0	0
0	0	1	0	0	1	0	0	1	0	1	0	0	0	1	0
0	0	1	0	0	1	0	0	1	0	1	0	0	0	0	1
0	0	1	0	0	1	0	0	1	0	1	0	0	1	0	1
0	0	1	0	0	1	0	0	1	0	1	0	1	0	1	0
0	0	1	0	0	1	0	0	1	0	1	0	1	0	0	1
0	0	1	0	0	1	0	0	1	0	1	0	1	1	0	1
0	0	1	0	0	1	0	0	1	0	1	1	0	0	1	0
0	0	1	0	0	1	0	0	1	0	1	1	0	0	0	1
0	0	1	0	0	1	0	0	1	0	1	1	0	1	0	1
0	0	1	0	0	1	0	0	1	0	0	0	0	0	1	0
0	0	1	0	0	1	0	0	1	0	0	0	0	0	0	1
0	0	1	0	0	1	0	0	1	0	0	0	0	1	0	1
0	0	1	0	0	1	0	0	1	0	0	0	1	0	1	0
0	0	1	0	0	1	0	0	1	0	0	0	1	0	0	1
0	0	1	0	0	1	0	0	1	0	0	0	1	1	0	1
0	0	1	0	0	1	0	0	1	0	0	1	0	0	1	0
0	0	1	0	0	1	0	0	1	0	0	1	0	0	0	1
0	0	1	0	0	1	0	0	1	0	0	1	0	1	0	1
0	0	1	0	0	1	0	0	0	1	0	0	0	0	1	0
0	0	1	0	0	1	0	0	0	1	0	0	0	0	0	0
0	0	1	0	0	1	0	0	0	1	0	0	0	1	0	0
0	0	1	0	0	1	0	0	0	1	0	0	1	0	1	0
0	0	1	0	0	1	0	0	0	1	0	0	1	0	0	0
0	0	1	0	0	1	0	0	0	1	0	0	1	1	0	0
0	0	1	0	0	1	0	0	0	1	0	1	0	0	1	0
0	0	1	0	0	1	0	0	0	1	0	1	0	0	0	0
0	0	1	0	0	1	0	0	0	1	0	1	0	1	0	0
0	0	1	0	0	1	0	0	0	0	1	0	0	0	1	0
0	0	1	0	0	1	0	0	0	0	1	0	0	0	0	1
0	0	1	0	0	1	0	0	0	0	1	0	0	1	0	1
0	0	1	0	0	1	0	0	0	0	1	0	1	0	1	0
0	0	1	0	0	1	0	0	0	0	1	0	1	0	0	1
0	0	1	0	0	1	0	0	0	0	1	0	1	1	0	1
0	0	1	0	0	1	0	0	0	0	1	1	0	0	1	0
0	0	1	0	0	1	0	0	0	0	1	1	0	0	0	1
0	0	1	0	0	1	0	0	0	0	1	1	0	1	0	1
0	0	1	0	0	1	0	0	0	0	0	0	0	0	1	0
0	0	1	0	0	1	0	0	0	0	0	0	0	0	0	1
0	0	1	0	0	1	0	0	0	0	0	0	0	1	0	1
0	0	1	0	0	1	0	0	0	0	0	0	1	0	1	0
0	0	1	0	0	1	0	0	0	0	0	0	1	0	0	1
0	0	1	0	0	1	0	0	0	0	0	0	1	1	0	1
0	0	1	0	0	1	0	0	0	0	0	1	0	0	1	0
0	0	1	0	0	1	0	0	0	0	0	1	0	0	0	1
0	0	1	0	0	1	0	0	0	0	0	1	0	1	0	1
0	0	1	0	1	0	1	0	0	1	0	0	0	0	1	0
0	0	1	0	1	0	1	0	0	1	0	0	0	0	0	0
0	0	1	0	1	0	1	0	0	1	0	0	0	1	0	0
0	0	1	0	1	0	1	0	0	1	0	0	1	0	1	0
0	0	1	0	1	0	1	0	0	1	0	0	1	0	0	0
0	0	1	0	1	0	1	0	0	1	0	0	1	1	0	0
0	0	1	0	1	0	1	0	0	1	0	1	0	0	1	0
0	0	1	0	1	0	1	0	0	1	0	1	0	0	0	0
0	0	1	0	1	0	1	0	0	1	0	1	0	1	0	0
0	0	1	0	1	0	1	0	0	0	1	0	0	0	1	0
0	0	1	0	1	0	1	0	0	0	1	0	0	0	0	1
0	0	1	0	1	0	1	0	0	0	1	0	0	1	0	1
0	0	1	0	1	0	1	0	0	0	1	0	1	0	1	0
0	0	1	0	1	0	1	0	0	0	1	0	1	0	0	1
0	0	1	0	1	0	1	0	0	0	1	0	1	1	0	1
0	0	1	0	1	0	1	0	0	0	1	1	0	0	1	0
0	0	1	0	1	0	1	0	0	0	1	1	0	0	0	1
0	0	1	0	1	0	1	0	0	0	1	1	0	1	0	1
0	0	1	0	1	0	1	0	0	0	0	0	0	0	1	0
0	0	1	0	1	0	1	0	0	0	0	0	0	0	0	0
0	0	1	0	1	0	1	0	0	0	0	0	0	1	0	0
0	0	1	0	1	0	1	0	0	0	0	0	1	0	1	0
0	0	1	0	1	0	1	0	0	0	0	0	1	0	0	1
0	0	1	0	1	0	1	0	0	0	0	0	1	1	0	1
0	0	1	0	1	0	1	0	0	0	0	1	0	0	1	0
0	0	1	0	1	0	1	0	0	0	0	1	0	0	0	1
0	0	1	0	1	0	1	0	0	0	0	1	0	1	0	1
0	0	1	0	1	0	0	1	0	1	0	0	0	0	1	0
0	0	1	0	1	0	0	1	0	1	0	0	0	0	0	0
0	0	1	0	1	0	0	1	0	1	0	0	0	1	0	0
0	0	1	0	1	0	0	1	0	1	0	0	1	0	1	0
0	0	1	0	1	0	0	1	0	1	0	0	1	0	0	0
0	0	1	0	1	0	0	1	0	1	0	0	1	1	0	0
0	0	1	0	1	0	0	1	0	1	0	1	0	0	1	0
0	0	1	0	1	0	0	1	0	1	0	1	0	0	0	0
0	0	1	0	1	0	0	1	0	1	0	1	0	1	0	0
0	0	1	0	1	0	0	1	0	0	1	0	0	0	1	0
0	0	1	0	1	0	0	1	0	0	1	0	0	0	0	1
0	0	1	0	1	0	0	1	0	0	1	0	0	1	0	1
0	0	1	0	1	0	0	1	0	0	1	0	1	0	1	0
0	0	1	0	1	0	0	1	0	0	1	0	1	0	0	1
0	0	1	0	1	0	0	1	0	0	1	0	1	1	0	1
0	0	1	0	1	0	0	1	0	0	1	1	0	0	1	0
0	0	1	0	1	0	0	1	0	0	1	1	0	0	0	1
0	0	1	0	1	0	0	1	0	0	1	1	0	1	0	1
0	0	1	0	1	0	0	1	0	0	0	0	0	0	1	0
0	0	1	0	1	0	0	1	0	0	0	0	0	0	0	1
0	0	1	0	1	0	0	1	0	0	0	0	0	1	0	1
0	0	1	0	1	0	0	1	0	0	0	0	1	0	1	0
0	0	1	0	1	0	0	1	0	0	0	0	1	0	0	1
0	0	1	0	1	0	0	1	0	0	0	0	1	1	0	1
0	0	1	0	1	0	0	1	0	0	0	1	0	0	1	0
0	0	1	0	1	0	0	1	0	0	0	1	0	0	0	1
0	0	1	0	1	0	0	1	0	0	0	1	0	1	0	1
0	0	1	0	1	0	0	0	1	1	0	0	0	0	1	0
0	0	1	0	1	0	0	0	1	1	0	0	0	0	0	0
0	0	1	0	1	0	0	0	1	1	0	0	0	1	0	0
0	0	1	0	1	0	0	0	1	1	0	0	1	0	1	0
0	0	1	0	1	0	0	0	1	1	0	0	1	0	0	0
0	0	1	0	1	0	0	0	1	1	0	0	1	1	0	0
0	0	1	0	1	0	0	0	1	1	0	1	0	0	1	0
0	0	1	0	1	0	0	0	1	1	0	1	0	0	0	0
0	0	1	0	1	0	0	0	1	1	0	1	0	1	0	0
0	0	1	0	1	0	0	0	1	0	1	0	0	0	1	0
0	0	1	0	1	0	0	0	1	0	1	0	0	0	0	1
0	0	1	0	1	0	0	0	1	0	1	0	0	1	0	1
0	0	1	0	1	0	0	0	1	0	1	0	1	0	1	0
0	0	1	0	1	0	0	0	1	0	1	0	1	0	0	1
0	0	1	0	1	0	0	0	1	0	1	0	1	1	0	1
0	0	1	0	1	0	0	0	1	0	1	1	0	0	1	0
0	0	1	0	1	0	0	0	1	0	1	1	0	0	0	1
0	0	1	0	1	0	0	0	1	0	1	1	0	1	0	1
0	0	1	0	1	0	0	0	1	0	0	0	0	0	1	0
0	0	1	0	1	0	0	0	1	0	0	0	0	0	0	1
0	0	1	0	1	0	0	0	1	0	0	0	0	1	0	1
0	0	1	0	1	0	0	0	1	0	0	0	1	0	1	0
0	0	1	0	1	0	0	0	1	0	0	0	1	0	0	1
0	0	1	0	1	0	0	0	1	0	0	0	1	1	0	1
0	0	1	0	1	0	0	0	1	0	0	1	0	0	1	0
0	0	1	0	1	0	0	0	1	0	0	1	0	0	0	1
0	0	1	0	1	0	0	0	1	0	0	1	0	1	0	1
0	0	1	0	1	0	0	0	0	1	0	0	0	0	1	0
0	0	1	0	1	0	0	0	0	1	0	0	0	0	0	0
0	0	1	0	1	0	0	0	0	1	0	0	0	1	0	0
0	0	1	0	1	0	0	0	0	1	0	0	1	0	1	0
0	0	1	0	1	0	0	0	0	1	0	0	1	0	0	0
0	0	1	0	1	0	0	0	0	1	0	0	1	1	0	0
0	0	1	0	1	0	0	0	0	1	0	1	0	0	1	0
0	0	1	0	1	0	0	0	0	1	0	1	0	0	0	0
0	0	1	0	1	0	0	0	0	1	0	1	0	1	0	0
0	0	1	0	1	0	0	0	0	0	1	0	0	0	1	0
0	0	1	0	1	0	0	0	0	0	1	0	0	0	0	1
0	0	1	0	1	0	0	0	0	0	1	0	0	1	0	1
0	0	1	0	1	0	0	0	0	0	1	0	1	0	1	0
0	0	1	0	1	0	0	0	0	0	1	0	1	0	0	1
0	0	1	0	1	0	0	0	0	0	1	0	1	1	0	1
0	0	1	0	1	0	0	0	0	0	1	1	0	0	1	0
0	0	1	0	1	0	0	0	0	0	1	1	0	0	0	1
0	0	1	0	1	0	0	0	0	0	1	1	0	1	0	1
0	0	1	0	1	0	0	0	0	0	0	0	0	0	1	0
0	0	1	0	1	0	0	0	0	0	0	0	0	0	0	1
0	0	1	0	1	0	0	0	0	0	0	0	0	1	0	1
0	0	1	0	1	0	0	0	0	0	0	0	1	0	1	0
0	0	1	0	1	0	0	0	0	0	0	0	1	0	0	1
0	0	1	0	1	0	0	0	0	0	0	0	1	1	0	1
0	0	1	0	1	0	0	0	0	0	0	1	0	0	1	0
0	0	1	0	1	0	0	0	0	0	0	1	0	0	0	1
0	0	1	0	1	0	0	0	0	0	0	1	0	1	0	1
0	1	0	0	0	0	1	0	0	1	0	0	0	0	1	0
0	1	0	0	0	0	1	0	0	1	0	0	0	0	0	0
0	1	0	0	0	0	1	0	0	1	0	0	0	1	0	0
0	1	0	0	0	0	1	0	0	1	0	0	1	0	1	0
0	1	0	0	0	0	1	0	0	1	0	0	1	0	0	0
0	1	0	0	0	0	1	0	0	1	0	0	1	1	0	0
0	1	0	0	0	0	1	0	0	1	0	1	0	0	1	0
0	1	0	0	0	0	1	0	0	1	0	1	0	0	0	0
0	1	0	0	0	0	1	0	0	1	0	1	0	1	0	0
0	1	0	0	0	0	1	0	0	0	1	0	0	0	1	0
0	1	0	0	0	0	1	0	0	0	1	0	0	0	0	0
0	1	0	0	0	0	1	0	0	0	1	0	0	1	0	1
0	1	0	0	0	0	1	0	0	0	1	0	1	0	1	0
0	1	0	0	0	0	1	0	0	0	1	0	1	0	0	0
0	1	0	0	0	0	1	0	0	0	1	0	1	1	0	1
0	1	0	0	0	0	1	0	0	0	1	1	0	0	1	0
0	1	0	0	0	0	1	0	0	0	1	1	0	0	0	1
0	1	0	0	0	0	1	0	0	0	1	1	0	1	0	1
0	1	0	0	0	0	1	0	0	0	0	0	0	0	1	0
0	1	0	0	0	0	1	0	0	0	0	0	0	0	0	0
0	1	0	0	0	0	1	0	0	0	0	0	0	1	0	0
0	1	0	0	0	0	1	0	0	0	0	0	1	0	1	0
0	1	0	0	0	0	1	0	0	0	0	0	1	0	0	0
0	1	0	0	0	0	1	0	0	0	0	0	1	1	0	1
0	1	0	0	0	0	1	0	0	0	0	1	0	0	1	0
0	1	0	0	0	0	1	0	0	0	0	1	0	0	0	1
0	1	0	0	0	0	1	0	0	0	0	1	0	1	0	1
0	1	0	0	0	0	0	1	0	1	0	0	0	0	1	0
0	1	0	0	0	0	0	1	0	1	0	0	0	0	0	0
0	1	0	0	0	0	0	1	0	1	0	0	0	1	0	0
0	1	0	0	0	0	0	1	0	1	0	0	1	0	1	0
0	1	0	0	0	0	0	1	0	1	0	0	1	0	0	0
0	1	0	0	0	0	0	1	0	1	0	0	1	1	0	0
0	1	0	0	0	0	0	1	0	1	0	1	0	0	1	0
0	1	0	0	0	0	0	1	0	1	0	1	0	0	0	0
0	1	0	0	0	0	0	1	0	1	0	1	0	1	0	0
0	1	0	0	0	0	0	1	0	0	1	0	0	0	1	0
0	1	0	0	0	0	0	1	0	0	1	0	0	0	0	0
0	1	0	0	0	0	0	1	0	0	1	0	0	1	0	1
0	1	0	0	0	0	0	1	0	0	1	0	1	0	1	0
0	1	0	0	0	0	0	1	0	0	1	0	1	0	0	0
0	1	0	0	0	0	0	1	0	0	1	0	1	1	0	1
0	1	0	0	0	0	0	1	0	0	1	1	0	0	1	0
0	1	0	0	0	0	0	1	0	0	1	1	0	0	0	1
0	1	0	0	0	0	0	1	0	0	1	1	0	1	0	1
0	1	0	0	0	0	0	1	0	0	0	0	0	0	1	0
0	1	0	0	0	0	0	1	0	0	0	0	0	0	0	0
0	1	0	0	0	0	0	1	0	0	0	0	0	1	0	1
0	1	0	0	0	0	0	1	0	0	0	0	1	0	1	0
0	1	0	0	0	0	0	1	0	0	0	0	1	0	0	1
0	1	0	0	0	0	0	1	0	0	0	0	1	1	0	1
0	1	0	0	0	0	0	1	0	0	0	1	0	0	1	0
0	1	0	0	0	0	0	1	0	0	0	1	0	0	0	1
0	1	0	0	0	0	0	1	0	0	0	1	0	1	0	1
0	1	0	0	0	0	0	0	1	1	0	0	0	0	1	0
0	1	0	0	0	0	0	0	1	1	0	0	0	0	0	0
0	1	0	0	0	0	0	0	1	1	0	0	0	1	0	0
0	1	0	0	0	0	0	0	1	1	0	0	1	0	1	0
0	1	0	0	0	0	0	0	1	1	0	0	1	0	0	0
0	1	0	0	0	0	0	0	1	1	0	0	1	1	0	0
0	1	0	0	0	0	0	0	1	1	0	1	0	0	1	0
0	1	0	0	0	0	0	0	1	1	0	1	0	0	0	0
0	1	0	0	0	0	0	0	1	1	0	1	0	1	0	0
0	1	0	0	0	0	0	0	1	0	1	0	0	0	1	0
0	1	0	0	0	0	0	0	1	0	1	0	0	0	0	0
0	1	0	0	0	0	0	0	1	0	1	0	0	1	0	1
0	1	0	0	0	0	0	0	1	0	1	0	1	0	1	0
0	1	0	0	0	0	0	0	1	0	1	0	1	0	0	1
0	1	0	0	0	0	0	0	1	0	1	0	1	1	0	1
0	1	0	0	0	0	0	0	1	0	1	1	0	0	1	0
0	1	0	0	0	0	0	0	1	0	1	1	0	0	0	1
0	1	0	0	0	0	0	0	1	0	1	1	0	1	0	1
0	1	0	0	0	0	0	0	1	0	0	0	0	0	1	0
0	1	0	0	0	0	0	0	1	0	0	0	0	0	0	0
0	1	0	0	0	0	0	0	1	0	0	0	0	1	0	1
0	1	0	0	0	0	0	0	1	0	0	0	1	0	1	0
0	1	0	0	0	0	0	0	1	0	0	0	1	0	0	1
0	1	0	0	0	0	0	0	1	0	0	0	1	1	0	1
0	1	0	0	0	0	0	0	1	0	0	1	0	0	1	0
0	1	0	0	0	0	0	0	1	0	0	1	0	0	0	1
0	1	0	0	0	0	0	0	1	0	0	1	0	1	0	1
0	1	0	0	0	0	0	0	0	1	0	0	0	0	1	0
0	1	0	0	0	0	0	0	0	1	0	0	0	0	0	0
0	1	0	0	0	0	0	0	0	1	0	0	0	1	0	0
0	1	0	0	0	0	0	0	0	1	0	0	1	0	1	0
0	1	0	0	0	0	0	0	0	1	0	0	1	0	0	0
0	1	0	0	0	0	0	0	0	1	0	0	1	1	0	0
0	1	0	0	0	0	0	0	0	1	0	1	0	0	1	0
0	1	0	0	0	0	0	0	0	1	0	1	0	0	0	0
0	1	0	0	0	0	0	0	0	1	0	1	0	1	0	0
0	1	0	0	0	0	0	0	0	0	1	0	0	0	1	0
0	1	0	0	0	0	0	0	0	0	1	0	0	0	0	0
0	1	0	0	0	0	0	0	0	0	1	0	0	1	0	1
0	1	0	0	0	0	0	0	0	0	1	0	1	0	1	0
0	1	0	0	0	0	0	0	0	0	1	0	1	0	0	1
0	1	0	0	0	0	0	0	0	0	1	0	1	1	0	1
0	1	0	0	0	0	0	0	0	0	1	1	0	0	1	0
0	1	0	0	0	0	0	0	0	0	1	1	0	0	0	1
0	1	0	0	0	0	0	0	0	0	1	1	0	1	0	1
0	1	0	0	0	0	0	0	0	0	0	0	0	0	1	0
0	1	0	0	0	0	0	0	0	0	0	0	0	0	0	0
0	1	0	0	0	0	0	0	0	0	0	0	0	1	0	1
0	1	0	0	0	0	0	0	0	0	0	0	1	0	1	0
0	1	0	0	0	0	0	0	0	0	0	0	1	0	0	1
0	1	0	0	0	0	0	0	0	0	0	0	1	1	0	1
0	1	0	0	0	0	0	0	0	0	0	1	0	0	1	0
0	1	0	0	0	0	0	0	0	0	0	1	0	0	0	1
0	1	0	0	0	0	0	0	0	0	0	1	0	1	0	1
0	1	0	1	0	0	1	0	0	1	0	0	0	0	1	0
0	1	0	1	0	0	1	0	0	1	0	0	0	0	0	0
0	1	0	1	0	0	1	0	0	1	0	0	0	1	0	0
0	1	0	1	0	0	1	0	0	1	0	0	1	0	1	0
0	1	0	1	0	0	1	0	0	1	0	0	1	0	0	0
0	1	0	1	0	0	1	0	0	1	0	0	1	1	0	0
0	1	0	1	0	0	1	0	0	1	0	1	0	0	1	0
0	1	0	1	0	0	1	0	0	1	0	1	0	0	0	0
0	1	0	1	0	0	1	0	0	1	0	1	0	1	0	0
0	1	0	1	0	0	1	0	0	0	1	0	0	0	1	0
0	1	0	1	0	0	1	0	0	0	1	0	0	0	0	1
0	1	0	1	0	0	1	0	0	0	1	0	0	1	0	1
0	1	0	1	0	0	1	0	0	0	1	0	1	0	1	0
0	1	0	1	0	0	1	0	0	0	1	0	1	0	0	1
0	1	0	1	0	0	1	0	0	0	1	0	1	1	0	1
0	1	0	1	0	0	1	0	0	0	1	1	0	0	1	0
0	1	0	1	0	0	1	0	0	0	1	1	0	0	0	1
0	1	0	1	0	0	1	0	0	0	1	1	0	1	0	1
0	1	0	1	0	0	1	0	0	0	0	0	0	0	1	0
0	1	0	1	0	0	1	0	0	0	0	0	0	0	0	0
0	1	0	1	0	0	1	0	0	0	0	0	0	1	0	0
0	1	0	1	0	0	1	0	0	0	0	0	1	0	1	0
0	1	0	1	0	0	1	0	0	0	0	0	1	0	0	1
0	1	0	1	0	0	1	0	0	0	0	0	1	1	0	1
0	1	0	1	0	0	1	0	0	0	0	1	0	0	1	0
0	1	0	1	0	0	1	0	0	0	0	1	0	0	0	1
0	1	0	1	0	0	1	0	0	0	0	1	0	1	0	1
0	1	0	1	0	0	0	1	0	1	0	0	0	0	1	0
0	1	0	1	0	0	0	1	0	1	0	0	0	0	0	0
0	1	0	1	0	0	0	1	0	1	0	0	0	1	0	0
0	1	0	1	0	0	0	1	0	1	0	0	1	0	1	0
0	1	0	1	0	0	0	1	0	1	0	0	1	0	0	0
0	1	0	1	0	0	0	1	0	1	0	0	1	1	0	0
0	1	0	1	0	0	0	1	0	1	0	1	0	0	1	0
0	1	0	1	0	0	0	1	0	1	0	1	0	0	0	0
0	1	0	1	0	0	0	1	0	1	0	1	0	1	0	0
0	1	0	1	0	0	0	1	0	0	1	0	0	0	1	0
0	1	0	1	0	0	0	1	0	0	1	0	0	0	0	1
0	1	0	1	0	0	0	1	0	0	1	0	0	1	0	1
0	1	0	1	0	0	0	1	0	0	1	0	1	0	1	0
0	1	0	1	0	0	0	1	0	0	1	0	1	0	0	1
0	1	0	1	0	0	0	1	0	0	1	0	1	1	0	1
0	1	0	1	0	0	0	1	0	0	1	1	0	0	1	0
0	1	0	1	0	0	0	1	0	0	1	1	0	0	0	1
0	1	0	1	0	0	0	1	0	0	1	1	0	1	0	1
0	1	0	1	0	0	0	1	0	0	0	0	0	0	1	0
0	1	0	1	0	0	0	1	0	0	0	0	0	0	0	1
0	1	0	1	0	0	0	1	0	0	0	0	0	1	0	1
0	1	0	1	0	0	0	1	0	0	0	0	1	0	1	0
0	1	0	1	0	0	0	1	0	0	0	0	1	0	0	1
0	1	0	1	0	0	0	1	0	0	0	0	1	1	0	1
0	1	0	1	0	0	0	1	0	0	0	1	0	0	1	0
0	1	0	1	0	0	0	1	0	0	0	1	0	0	0	1
0	1	0	1	0	0	0	1	0	0	0	1	0	1	0	1
0	1	0	1	0	0	0	0	1	1	0	0	0	0	1	0
0	1	0	1	0	0	0	0	1	1	0	0	0	0	0	0
0	1	0	1	0	0	0	0	1	1	0	0	0	1	0	0
0	1	0	1	0	0	0	0	1	1	0	0	1	0	1	0
0	1	0	1	0	0	0	0	1	1	0	0	1	0	0	0
0	1	0	1	0	0	0	0	1	1	0	0	1	1	0	0
0	1	0	1	0	0	0	0	1	1	0	1	0	0	1	0
0	1	0	1	0	0	0	0	1	1	0	1	0	0	0	0
0	1	0	1	0	0	0	0	1	1	0	1	0	1	0	0
0	1	0	1	0	0	0	0	1	0	1	0	0	0	1	0
0	1	0	1	0	0	0	0	1	0	1	0	0	0	0	1
0	1	0	1	0	0	0	0	1	0	1	0	0	1	0	1
0	1	0	1	0	0	0	0	1	0	1	0	1	0	1	0
0	1	0	1	0	0	0	0	1	0	1	0	1	0	0	1
0	1	0	1	0	0	0	0	1	0	1	0	1	1	0	1
0	1	0	1	0	0	0	0	1	0	1	1	0	0	1	0
0	1	0	1	0	0	0	0	1	0	1	1	0	0	0	1
0	1	0	1	0	0	0	0	1	0	1	1	0	1	0	1
0	1	0	1	0	0	0	0	1	0	0	0	0	0	1	0
0	1	0	1	0	0	0	0	1	0	0	0	0	0	0	1
0	1	0	1	0	0	0	0	1	0	0	0	0	1	0	1
0	1	0	1	0	0	0	0	1	0	0	0	1	0	1	0
0	1	0	1	0	0	0	0	1	0	0	0	1	0	0	1
0	1	0	1	0	0	0	0	1	0	0	0	1	1	0	1
0	1	0	1	0	0	0	0	1	0	0	1	0	0	1	0
0	1	0	1	0	0	0	0	1	0	0	1	0	0	0	1
0	1	0	1	0	0	0	0	1	0	0	1	0	1	0	1
0	1	0	1	0	0	0	0	0	1	0	0	0	0	1	0
0	1	0	1	0	0	0	0	0	1	0	0	0	0	0	0
0	1	0	1	0	0	0	0	0	1	0	0	0	1	0	0
0	1	0	1	0	0	0	0	0	1	0	0	1	0	1	0
0	1	0	1	0	0	0	0	0	1	0	0	1	0	0	0
0	1	0	1	0	0	0	0	0	1	0	0	1	1	0	0
0	1	0	1	0	0	0	0	0	1	0	1	0	0	1	0
0	1	0	1	0	0	0	0	0	1	0	1	0	0	0	0
0	1	0	1	0	0	0	0	0	1	0	1	0	1	0	0
0	1	0	1	0	0	0	0	0	0	1	0	0	0	1	0
0	1	0	1	0	0	0	0	0	0	1	0	0	0	0	1
0	1	0	1	0	0	0	0	0	0	1	0	0	1	0	1
0	1	0	1	0	0	0	0	0	0	1	0	1	0	1	0
0	1	0	1	0	0	0	0	0	0	1	0	1	0	0	1
0	1	0	1	0	0	0	0	0	0	1	0	1	1	0	1
0	1	0	1	0	0	0	0	0	0	1	1	0	0	1	0
0	1	0	1	0	0	0	0	0	0	1	1	0	0	0	1
0	1	0	1	0	0	0	0	0	0	1	1	0	1	0	1
0	1	0	1	0	0	0	0	0	0	0	0	0	0	1	0
0	1	0	1	0	0	0	0	0	0	0	0	0	0	0	1
0	1	0	1	0	0	0	0	0	0	0	0	0	1	0	1
0	1	0	1	0	0	0	0	0	0	0	0	1	0	1	0
0	1	0	1	0	0	0	0	0	0	0	0	1	0	0	1
0	1	0	1	0	0	0	0	0	0	0	0	1	1	0	1
0	1	0	1	0	0	0	0	0	0	0	1	0	0	1	0
0	1	0	1	0	0	0	0	0	0	0	1	0	0	0	1
0	1	0	1	0	0	0	0	0	0	0	1	0	1	0	1
0	1	0	0	0	1	1	0	0	1	0	0	0	0	1	0
0	1	0	0	0	1	1	0	0	1	0	0	0	0	0	0
0	1	0	0	0	1	1	0	0	1	0	0	0	1	0	0
0	1	0	0	0	1	1	0	0	1	0	0	1	0	1	0
0	1	0	0	0	1	1	0	0	1	0	0	1	0	0	0
0	1	0	0	0	1	1	0	0	1	0	0	1	1	0	0
0	1	0	0	0	1	1	0	0	1	0	1	0	0	1	0
0	1	0	0	0	1	1	0	0	1	0	1	0	0	0	0
0	1	0	0	0	1	1	0	0	1	0	1	0	1	0	0
0	1	0	0	0	1	1	0	0	0	1	0	0	0	1	0
0	1	0	0	0	1	1	0	0	0	1	0	0	0	0	1
0	1	0	0	0	1	1	0	0	0	1	0	0	1	0	1
0	1	0	0	0	1	1	0	0	0	1	0	1	0	1	0
0	1	0	0	0	1	1	0	0	0	1	0	1	0	0	1
0	1	0	0	0	1	1	0	0	0	1	0	1	1	0	1
0	1	0	0	0	1	1	0	0	0	1	1	0	0	1	0
0	1	0	0	0	1	1	0	0	0	1	1	0	0	0	1
0	1	0	0	0	1	1	0	0	0	1	1	0	1	0	1
0	1	0	0	0	1	1	0	0	0	0	0	0	0	1	0
0	1	0	0	0	1	1	0	0	0	0	0	0	0	0	0
0	1	0	0	0	1	1	0	0	0	0	0	0	1	0	0
0	1	0	0	0	1	1	0	0	0	0	0	1	0	1	0
0	1	0	0	0	1	1	0	0	0	0	0	1	0	0	1
0	1	0	0	0	1	1	0	0	0	0	0	1	1	0	1
0	1	0	0	0	1	1	0	0	0	0	1	0	0	1	0
0	1	0	0	0	1	1	0	0	0	0	1	0	0	0	1
0	1	0	0	0	1	1	0	0	0	0	1	0	1	0	1
0	1	0	0	0	1	0	1	0	1	0	0	0	0	1	0
0	1	0	0	0	1	0	1	0	1	0	0	0	0	0	0
0	1	0	0	0	1	0	1	0	1	0	0	0	1	0	0
0	1	0	0	0	1	0	1	0	1	0	0	1	0	1	0
0	1	0	0	0	1	0	1	0	1	0	0	1	0	0	0
0	1	0	0	0	1	0	1	0	1	0	0	1	1	0	0
0	1	0	0	0	1	0	1	0	1	0	1	0	0	1	0
0	1	0	0	0	1	0	1	0	1	0	1	0	0	0	0
0	1	0	0	0	1	0	1	0	1	0	1	0	1	0	0
0	1	0	0	0	1	0	1	0	0	1	0	0	0	1	0
0	1	0	0	0	1	0	1	0	0	1	0	0	0	0	1
0	1	0	0	0	1	0	1	0	0	1	0	0	1	0	1
0	1	0	0	0	1	0	1	0	0	1	0	1	0	1	0
0	1	0	0	0	1	0	1	0	0	1	0	1	0	0	1
0	1	0	0	0	1	0	1	0	0	1	0	1	1	0	1
0	1	0	0	0	1	0	1	0	0	1	1	0	0	1	0
0	1	0	0	0	1	0	1	0	0	1	1	0	0	0	1
0	1	0	0	0	1	0	1	0	0	1	1	0	1	0	1
0	1	0	0	0	1	0	1	0	0	0	0	0	0	1	0
0	1	0	0	0	1	0	1	0	0	0	0	0	0	0	1
0	1	0	0	0	1	0	1	0	0	0	0	0	1	0	1
0	1	0	0	0	1	0	1	0	0	0	0	1	0	1	0
0	1	0	0	0	1	0	1	0	0	0	0	1	0	0	1
0	1	0	0	0	1	0	1	0	0	0	0	1	1	0	1
0	1	0	0	0	1	0	1	0	0	0	1	0	0	1	0
0	1	0	0	0	1	0	1	0	0	0	1	0	0	0	1
0	1	0	0	0	1	0	1	0	0	0	1	0	1	0	1
0	1	0	0	0	1	0	0	1	1	0	0	0	0	1	0
0	1	0	0	0	1	0	0	1	1	0	0	0	0	0	0
0	1	0	0	0	1	0	0	1	1	0	0	0	1	0	0
0	1	0	0	0	1	0	0	1	1	0	0	1	0	1	0
0	1	0	0	0	1	0	0	1	1	0	0	1	0	0	0
0	1	0	0	0	1	0	0	1	1	0	0	1	1	0	0
0	1	0	0	0	1	0	0	1	1	0	1	0	0	1	0
0	1	0	0	0	1	0	0	1	1	0	1	0	0	0	0
0	1	0	0	0	1	0	0	1	1	0	1	0	1	0	0
0	1	0	0	0	1	0	0	1	0	1	0	0	0	1	0
0	1	0	0	0	1	0	0	1	0	1	0	0	0	0	1
0	1	0	0	0	1	0	0	1	0	1	0	0	1	0	1
0	1	0	0	0	1	0	0	1	0	1	0	1	0	1	0
0	1	0	0	0	1	0	0	1	0	1	0	1	0	0	1
0	1	0	0	0	1	0	0	1	0	1	0	1	1	0	1
0	1	0	0	0	1	0	0	1	0	1	1	0	0	1	0
0	1	0	0	0	1	0	0	1	0	1	1	0	0	0	1
0	1	0	0	0	1	0	0	1	0	1	1	0	1	0	1
0	1	0	0	0	1	0	0	1	0	0	0	0	0	1	0
0	1	0	0	0	1	0	0	1	0	0	0	0	0	0	1
0	1	0	0	0	1	0	0	1	0	0	0	0	1	0	1
0	1	0	0	0	1	0	0	1	0	0	0	1	0	1	0
0	1	0	0	0	1	0	0	1	0	0	0	1	0	0	1
0	1	0	0	0	1	0	0	1	0	0	0	1	1	0	1
0	1	0	0	0	1	0	0	1	0	0	1	0	0	1	0
0	1	0	0	0	1	0	0	1	0	0	1	0	0	0	1
0	1	0	0	0	1	0	0	1	0	0	1	0	1	0	1
0	1	0	0	0	1	0	0	0	1	0	0	0	0	1	0
0	1	0	0	0	1	0	0	0	1	0	0	0	0	0	0
0	1	0	0	0	1	0	0	0	1	0	0	0	1	0	0
0	1	0	0	0	1	0	0	0	1	0	0	1	0	1	0
0	1	0	0	0	1	0	0	0	1	0	0	1	0	0	0
0	1	0	0	0	1	0	0	0	1	0	0	1	1	0	0
0	1	0	0	0	1	0	0	0	1	0	1	0	0	1	0
0	1	0	0	0	1	0	0	0	1	0	1	0	0	0	0
0	1	0	0	0	1	0	0	0	1	0	1	0	1	0	0
0	1	0	0	0	1	0	0	0	0	1	0	0	0	1	0
0	1	0	0	0	1	0	0	0	0	1	0	0	0	0	1
0	1	0	0	0	1	0	0	0	0	1	0	0	1	0	1
0	1	0	0	0	1	0	0	0	0	1	0	1	0	1	0
0	1	0	0	0	1	0	0	0	0	1	0	1	0	0	1
0	1	0	0	0	1	0	0	0	0	1	0	1	1	0	1
0	1	0	0	0	1	0	0	0	0	1	1	0	0	1	0
0	1	0	0	0	1	0	0	0	0	1	1	0	0	0	1
0	1	0	0	0	1	0	0	0	0	1	1	0	1	0	1
0	1	0	0	0	1	0	0	0	0	0	0	0	0	1	0
0	1	0	0	0	1	0	0	0	0	0	0	0	0	0	1
0	1	0	0	0	1	0	0	0	0	0	0	0	1	0	1
0	1	0	0	0	1	0	0	0	0	0	0	1	0	1	0
0	1	0	0	0	1	0	0	0	0	0	0	1	0	0	1
0	1	0	0	0	1	0	0	0	0	0	0	1	1	0	1
0	1	0	0	0	1	0	0	0	0	0	1	0	0	1	0
0	1	0	0	0	1	0	0	0	0	0	1	0	0	0	1
0	1	0	0	0	1	0	0	0	0	0	1	0	1	0	1
0	1	0	0	1	0	1	0	0	1	0	0	0	0	1	0
0	1	0	0	1	0	1	0	0	1	0	0	0	0	0	0
0	1	0	0	1	0	1	0	0	1	0	0	0	1	0	0
0	1	0	0	1	0	1	0	0	1	0	0	1	0	1	0
0	1	0	0	1	0	1	0	0	1	0	0	1	0	0	0
0	1	0	0	1	0	1	0	0	1	0	0	1	1	0	0
0	1	0	0	1	0	1	0	0	1	0	1	0	0	1	0
0	1	0	0	1	0	1	0	0	1	0	1	0	0	0	0
0	1	0	0	1	0	1	0	0	1	0	1	0	1	0	0
0	1	0	0	1	0	1	0	0	0	1	0	0	0	1	0
0	1	0	0	1	0	1	0	0	0	1	0	0	0	0	1
0	1	0	0	1	0	1	0	0	0	1	0	0	1	0	1
0	1	0	0	1	0	1	0	0	0	1	0	1	0	1	0
0	1	0	0	1	0	1	0	0	0	1	0	1	0	0	1
0	1	0	0	1	0	1	0	0	0	1	0	1	1	0	1
0	1	0	0	1	0	1	0	0	0	1	1	0	0	1	0
0	1	0	0	1	0	1	0	0	0	1	1	0	0	0	1
0	1	0	0	1	0	1	0	0	0	1	1	0	1	0	1
0	1	0	0	1	0	1	0	0	0	0	0	0	0	1	0
0	1	0	0	1	0	1	0	0	0	0	0	0	0	0	0
0	1	0	0	1	0	1	0	0	0	0	0	0	1	0	0
0	1	0	0	1	0	1	0	0	0	0	0	1	0	1	0
0	1	0	0	1	0	1	0	0	0	0	0	1	0	0	1
0	1	0	0	1	0	1	0	0	0	0	0	1	1	0	1
0	1	0	0	1	0	1	0	0	0	0	1	0	0	1	0
0	1	0	0	1	0	1	0	0	0	0	1	0	0	0	1
0	1	0	0	1	0	1	0	0	0	0	1	0	1	0	1
0	1	0	0	1	0	0	1	0	1	0	0	0	0	1	0
0	1	0	0	1	0	0	1	0	1	0	0	0	0	0	0
0	1	0	0	1	0	0	1	0	1	0	0	0	1	0	0
0	1	0	0	1	0	0	1	0	1	0	0	1	0	1	0
0	1	0	0	1	0	0	1	0	1	0	0	1	0	0	0
0	1	0	0	1	0	0	1	0	1	0	0	1	1	0	0
0	1	0	0	1	0	0	1	0	1	0	1	0	0	1	0
0	1	0	0	1	0	0	1	0	1	0	1	0	0	0	0
0	1	0	0	1	0	0	1	0	1	0	1	0	1	0	0
0	1	0	0	1	0	0	1	0	0	1	0	0	0	1	0
0	1	0	0	1	0	0	1	0	0	1	0	0	0	0	1
0	1	0	0	1	0	0	1	0	0	1	0	0	1	0	1
0	1	0	0	1	0	0	1	0	0	1	0	1	0	1	0
0	1	0	0	1	0	0	1	0	0	1	0	1	0	0	1
0	1	0	0	1	0	0	1	0	0	1	0	1	1	0	1
0	1	0	0	1	0	0	1	0	0	1	1	0	0	1	0
0	1	0	0	1	0	0	1	0	0	1	1	0	0	0	1
0	1	0	0	1	0	0	1	0	0	1	1	0	1	0	1
0	1	0	0	1	0	0	1	0	0	0	0	0	0	1	0
0	1	0	0	1	0	0	1	0	0	0	0	0	0	0	1
0	1	0	0	1	0	0	1	0	0	0	0	0	1	0	1
0	1	0	0	1	0	0	1	0	0	0	0	1	0	1	0
0	1	0	0	1	0	0	1	0	0	0	0	1	0	0	1
0	1	0	0	1	0	0	1	0	0	0	0	1	1	0	1
0	1	0	0	1	0	0	1	0	0	0	1	0	0	1	0
0	1	0	0	1	0	0	1	0	0	0	1	0	0	0	1
0	1	0	0	1	0	0	1	0	0	0	1	0	1	0	1
0	1	0	0	1	0	0	0	1	1	0	0	0	0	1	0
0	1	0	0	1	0	0	0	1	1	0	0	0	0	0	0
0	1	0	0	1	0	0	0	1	1	0	0	0	1	0	0
0	1	0	0	1	0	0	0	1	1	0	0	1	0	1	0
0	1	0	0	1	0	0	0	1	1	0	0	1	0	0	0
0	1	0	0	1	0	0	0	1	1	0	0	1	1	0	0
0	1	0	0	1	0	0	0	1	1	0	1	0	0	1	0
0	1	0	0	1	0	0	0	1	1	0	1	0	0	0	0
0	1	0	0	1	0	0	0	1	1	0	1	0	1	0	0
0	1	0	0	1	0	0	0	1	0	1	0	0	0	1	0
0	1	0	0	1	0	0	0	1	0	1	0	0	0	0	1
0	1	0	0	1	0	0	0	1	0	1	0	0	1	0	1
0	1	0	0	1	0	0	0	1	0	1	0	1	0	1	0
0	1	0	0	1	0	0	0	1	0	1	0	1	0	0	1
0	1	0	0	1	0	0	0	1	0	1	0	1	1	0	1
0	1	0	0	1	0	0	0	1	0	1	1	0	0	1	0
0	1	0	0	1	0	0	0	1	0	1	1	0	0	0	1
0	1	0	0	1	0	0	0	1	0	1	1	0	1	0	1
0	1	0	0	1	0	0	0	1	0	0	0	0	0	1	0
0	1	0	0	1	0	0	0	1	0	0	0	0	0	0	1
0	1	0	0	1	0	0	0	1	0	0	0	0	1	0	1
0	1	0	0	1	0	0	0	1	0	0	0	1	0	1	0
0	1	0	0	1	0	0	0	1	0	0	0	1	0	0	1
0	1	0	0	1	0	0	0	1	0	0	0	1	1	0	1
0	1	0	0	1	0	0	0	1	0	0	1	0	0	1	0
0	1	0	0	1	0	0	0	1	0	0	1	0	0	0	1
0	1	0	0	1	0	0	0	1	0	0	1	0	1	0	1
0	1	0	0	1	0	0	0	0	1	0	0	0	0	1	0
0	1	0	0	1	0	0	0	0	1	0	0	0	0	0	0
0	1	0	0	1	0	0	0	0	1	0	0	0	1	0	0
0	1	0	0	1	0	0	0	0	1	0	0	1	0	1	0
0	1	0	0	1	0	0	0	0	1	0	0	1	0	0	0
0	1	0	0	1	0	0	0	0	1	0	0	1	1	0	0
0	1	0	0	1	0	0	0	0	1	0	1	0	0	1	0
0	1	0	0	1	0	0	0	0	1	0	1	0	0	0	0
0	1	0	0	1	0	0	0	0	1	0	1	0	1	0	0
0	1	0	0	1	0	0	0	0	0	1	0	0	0	1	0
0	1	0	0	1	0	0	0	0	0	1	0	0	0	0	1
0	1	0	0	1	0	0	0	0	0	1	0	0	1	0	1
0	1	0	0	1	0	0	0	0	0	1	0	1	0	1	0
0	1	0	0	1	0	0	0	0	0	1	0	1	0	0	1
0	1	0	0	1	0	0	0	0	0	1	0	1	1	0	1
0	1	0	0	1	0	0	0	0	0	1	1	0	0	1	0
0	1	0	0	1	0	0	0	0	0	1	1	0	0	0	1
0	1	0	0	1	0	0	0	0	0	1	1	0	1	0	1
0	1	0	0	1	0	0	0	0	0	0	0	0	0	1	0
0	1	0	0	1	0	0	0	0	0	0	0	0	0	0	1
0	1	0	0	1	0	0	0	0	0	0	0	0	1	0	1
0	1	0	0	1	0	0	0	0	0	0	0	1	0	1	0
0	1	0	0	1	0	0	0	0	0	0	0	1	0	0	1
0	1	0	0	1	0	0	0	0	0	0	0	1	1	0	1
0	1	0	0	1	0	0	0	0	0	0	1	0	0	1	0
0	1	0	0	1	0	0	0	0	0	0	1	0	0	0	1
0	1	0	0	1	0	0	0	0	0	0	1	0	1	0	1
