# Supplementary material
Source: ML conference proceedings conference paper supplement (https://proceedings.neurips.cc/paper_files/paper/2022/hash/5afaa8b4dd18eb1eed055d2d821b58ae-Abstract.html)
Supplement: Supplementary file 1 [file 5afaa8b4dd18eb1eed055d2d821b58ae-Supplemental-Conference.zip › 6769_exploring_the_whole_rashomon_s-Supplementary Material/6769_code_repo/experiments/datasets/compas/binned.csv]

sex:Female	age:<21	age:<23	age:<26	age:<46	juvenile-felonies:=0	juvenile-misdemeanors:=0	juvenile-crimes:=0	priors:=0	priors:=1	priors:2-3	priors:>3	recidivate-within-two-years:1
0	0	0	0	0	1	1	1	1	0	0	0	0
0	0	0	0	1	1	1	1	1	0	0	0	1
0	0	1	1	1	1	1	0	0	0	0	1	1
0	0	0	0	1	1	1	1	1	0	0	0	0
0	0	0	0	1	1	1	1	0	0	0	1	1
0	0	0	0	1	1	1	1	0	0	1	0	0
1	0	0	0	1	1	1	1	1	0	0	0	0
0	0	1	1	1	1	1	1	0	1	0	0	1
0	0	0	0	1	1	1	1	1	0	0	0	0
0	0	1	1	1	1	1	1	0	0	1	0	1
1	0	0	0	1	1	1	1	1	0	0	0	0
0	0	0	0	1	1	1	1	1	0	0	0	0
1	0	0	0	0	1	1	1	0	1	0	0	1
0	0	0	0	1	1	1	1	0	0	0	1	1
0	0	0	0	1	1	1	1	1	0	0	0	0
0	0	0	1	1	1	1	1	0	0	1	0	0
0	0	0	0	1	1	1	1	0	0	0	1	1
0	0	0	0	1	1	1	1	0	0	0	1	1
0	0	0	0	0	1	1	1	0	0	0	1	1
0	1	1	1	1	1	1	1	0	1	0	0	1
0	0	0	0	1	1	1	1	1	0	0	0	1
1	1	1	1	1	1	1	1	1	0	0	0	0
0	0	1	1	1	1	1	1	0	1	0	0	1
0	0	0	0	1	1	1	1	0	1	0	0	0
0	0	0	0	1	1	1	1	1	0	0	0	0
0	0	0	1	1	1	1	1	0	0	0	1	1
1	0	0	0	1	1	1	1	0	0	1	0	0
0	0	0	1	1	1	1	0	0	0	0	1	1
0	0	0	0	1	1	1	1	1	0	0	0	1
0	0	0	0	1	1	1	1	0	0	0	1	1
0	0	0	0	1	1	1	1	0	0	0	1	1
0	0	0	0	0	1	1	1	1	0	0	0	0
0	0	0	0	0	1	1	1	0	0	0	1	1
0	0	0	1	1	1	1	0	0	0	0	1	0
1	0	0	0	1	1	1	1	0	0	0	1	1
0	0	0	1	1	1	1	1	0	1	0	0	1
0	0	0	0	1	0	0	0	0	0	0	1	1
0	0	0	0	1	1	1	1	1	0	0	0	0
1	1	1	1	1	1	1	1	0	0	1	0	0
0	0	0	0	0	1	1	1	0	0	1	0	0
0	0	0	0	1	1	1	1	0	0	1	0	1
1	0	0	0	0	1	1	1	0	0	0	1	0
0	0	0	0	1	1	1	1	1	0	0	0	1
0	0	0	1	1	1	1	1	0	0	0	1	1
0	0	0	0	1	0	1	0	0	0	0	1	1
0	0	0	0	0	1	1	1	1	0	0	0	0
0	0	0	0	1	1	1	1	0	0	0	1	1
0	0	0	0	1	1	1	1	1	0	0	0	0
0	0	0	0	1	1	1	1	0	1	0	0	1
1	0	0	0	1	1	1	1	1	0	0	0	0
0	0	0	0	0	1	1	1	0	0	0	1	1
1	0	0	0	0	1	1	1	0	1	0	0	0
0	0	0	0	1	1	1	0	0	0	0	1	0
0	0	1	1	1	1	1	1	0	0	1	0	1
0	0	0	0	1	1	1	1	1	0	0	0	0
0	0	0	0	0	1	1	1	0	0	0	1	0
0	0	0	0	0	1	1	1	0	0	0	1	0
0	0	0	0	1	1	1	1	0	0	0	1	0
0	0	0	0	0	1	1	1	0	0	0	1	1
0	0	0	0	1	0	0	0	0	0	0	1	1
0	0	0	0	1	1	1	1	0	0	0	1	1
0	0	1	1	1	1	1	0	0	1	0	0	1
0	1	1	1	1	1	0	0	0	0	1	0	1
0	0	0	0	1	1	1	1	0	0	0	1	1
0	0	0	0	0	1	1	1	1	0	0	0	0
0	0	0	0	1	1	0	0	0	0	0	1	1
0	0	0	0	1	1	1	1	1	0	0	0	0
1	0	0	0	0	1	1	1	1	0	0	0	0
0	0	0	0	1	1	1	1	0	0	0	1	1
0	1	1	1	1	1	1	1	0	1	0	0	0
0	0	0	0	1	1	1	1	0	1	0	0	0
0	0	0	0	1	1	1	1	0	0	0	1	1
0	0	0	0	1	1	1	0	0	1	0	0	1
0	0	0	0	1	1	1	1	0	0	1	0	0
0	1	1	1	1	1	1	1	0	1	0	0	1
0	1	1	1	1	1	1	1	1	0	0	0	0
1	0	0	1	1	1	1	1	0	1	0	0	1
0	0	0	0	1	1	1	1	0	1	0	0	1
0	0	0	0	1	1	1	1	1	0	0	0	0
0	0	0	0	1	1	1	1	0	1	0	0	0
0	0	0	0	1	1	1	1	0	0	0	1	1
0	0	0	0	0	1	1	1	1	0	0	0	1
0	0	0	1	1	0	0	0	0	0	0	1	1
0	1	1	1	1	1	1	1	1	0	0	0	1
0	1	1	1	1	0	1	0	0	0	1	0	1
0	0	1	1	1	1	1	0	0	0	1	0	1
1	0	0	0	1	1	1	1	0	1	0	0	0
0	0	0	0	1	1	1	1	0	0	0	1	1
0	0	0	1	1	1	1	1	0	0	0	1	1
0	1	1	1	1	1	1	1	0	1	0	0	1
0	0	0	1	1	1	1	1	0	0	0	1	1
1	1	1	1	1	1	1	1	1	0	0	0	0
0	0	0	0	1	1	1	1	0	0	1	0	1
0	0	0	0	0	1	1	1	0	0	1	0	0
1	0	0	0	0	1	1	1	1	0	0	0	0
1	0	0	0	1	1	1	1	1	0	0	0	0
0	1	1	1	1	1	1	1	0	1	0	0	1
0	0	1	1	1	1	1	1	0	1	0	0	0
0	0	0	0	1	1	1	1	0	1	0	0	0
1	0	0	0	1	1	1	1	1	0	0	0	1
0	0	1	1	1	1	0	0	0	0	0	1	1
0	0	0	0	1	1	1	1	1	0	0	0	0
0	0	0	0	1	1	1	1	1	0	0	0	0
1	0	0	0	1	1	1	1	0	1	0	0	0
0	0	0	0	0	1	1	1	0	0	0	1	1
0	0	0	0	1	1	1	1	0	1	0	0	0
0	1	1	1	1	1	1	1	0	0	1	0	1
0	0	0	0	1	1	1	1	0	0	0	1	1
0	0	0	0	1	1	1	1	1	0	0	0	0
0	0	0	0	1	1	1	1	0	0	0	1	1
0	0	0	0	1	1	1	1	0	0	1	0	0
0	0	0	0	1	1	1	1	0	1	0	0	1
0	0	0	0	1	1	0	0	0	0	0	1	1
0	0	1	1	1	1	1	1	1	0	0	0	1
0	0	0	0	1	1	0	0	0	0	0	1	1
0	0	0	0	1	1	1	1	0	1	0	0	0
1	0	0	0	1	1	1	1	0	1	0	0	0
0	0	0	0	1	1	1	1	0	0	0	1	1
0	0	0	0	1	1	1	1	0	0	1	0	1
0	0	0	0	0	1	1	1	0	0	0	1	0
0	0	0	0	0	1	1	1	0	0	1	0	0
0	0	0	0	1	1	1	1	0	0	0	1	1
1	0	0	0	0	1	1	1	0	0	1	0	0
0	0	1	1	1	1	1	1	0	0	0	1	1
0	0	0	0	1	1	1	1	0	0	0	1	0
1	0	0	1	1	1	1	1	0	0	1	0	0
0	0	0	0	1	1	1	1	0	1	0	0	0
1	0	0	0	1	1	1	1	0	0	1	0	0
0	0	0	0	1	1	1	1	1	0	0	0	1
1	0	0	1	1	1	1	1	1	0	0	0	0
1	0	0	0	1	1	0	0	0	0	0	1	1
0	0	0	0	1	1	1	1	0	0	1	0	1
1	0	0	0	1	1	1	1	0	0	0	1	1
0	0	0	0	1	1	1	1	0	0	1	0	1
0	0	0	0	1	1	1	1	0	0	1	0	1
0	0	0	0	1	1	1	1	0	1	0	0	0
0	0	0	0	0	1	1	1	0	1	0	0	1
1	1	1	1	1	0	1	0	0	1	0	0	0
1	0	0	0	1	1	1	1	1	0	0	0	0
0	0	0	0	1	0	0	0	0	0	0	1	1
0	0	0	0	1	1	1	1	0	0	0	1	1
0	0	0	0	1	1	1	1	0	0	0	1	1
1	0	0	0	1	1	1	1	1	0	0	0	1
1	0	0	0	1	1	1	1	0	0	0	1	1
0	0	0	1	1	1	1	1	0	0	1	0	1
1	1	1	1	1	1	1	1	1	0	0	0	0
1	0	0	1	1	1	1	1	1	0	0	0	0
1	0	0	0	0	1	1	1	0	1	0	0	1
0	0	0	0	0	1	1	1	0	0	0	1	1
0	0	0	0	0	1	1	1	0	1	0	0	0
1	0	0	0	1	1	1	1	0	0	0	1	1
0	0	0	0	1	1	1	1	0	1	0	0	0
1	0	0	1	1	1	1	1	0	0	1	0	1
0	0	0	0	0	1	1	1	0	0	1	0	0
0	0	0	0	1	0	1	0	0	1	0	0	0
1	0	0	0	1	1	1	1	0	0	1	0	1
0	0	0	0	1	1	1	1	0	1	0	0	0
0	0	0	0	0	1	1	1	0	0	1	0	0
0	1	1	1	1	1	1	1	0	1	0	0	0
0	0	0	0	1	1	1	1	0	0	0	1	1
1	0	0	0	0	1	1	1	0	0	0	1	0
0	0	0	0	1	1	1	1	1	0	0	0	0
0	0	0	1	1	1	1	1	0	1	0	0	1
0	0	1	1	1	1	1	1	1	0	0	0	0
1	0	0	0	1	1	1	1	0	0	0	1	0
0	0	0	0	0	1	1	1	0	0	1	0	0
0	0	0	0	0	1	1	1	0	0	0	1	0
1	0	0	0	1	1	1	1	0	0	0	1	0
0	0	0	0	0	1	1	1	0	1	0	0	0
0	0	0	0	1	1	1	1	0	0	0	1	1
0	0	0	0	1	1	1	1	0	0	0	1	1
0	0	0	0	0	1	1	1	0	0	1	0	0
0	0	0	0	0	1	1	1	1	0	0	0	0
0	0	0	0	0	1	1	1	0	1	0	0	1
0	0	0	0	0	1	1	1	1	0	0	0	0
0	0	0	1	1	1	1	1	1	0	0	0	0
0	0	0	0	1	0	0	0	0	0	0	1	1
0	0	1	1	1	1	1	1	0	1	0	0	1
0	0	0	0	1	1	1	1	0	0	0	1	1
0	0	1	1	1	1	1	1	1	0	0	0	1
0	0	0	0	0	1	1	1	0	1	0	0	0
1	0	0	0	1	1	1	1	0	0	1	0	1
0	0	0	0	0	1	1	1	0	0	1	0	0
0	0	0	0	1	1	1	1	0	0	0	1	1
0	0	0	0	1	1	1	1	0	0	0	1	1
0	0	0	0	1	1	1	1	0	0	1	0	1
0	0	0	0	1	1	1	1	1	0	0	0	1
0	0	0	1	1	1	1	1	0	0	0	1	1
0	0	0	0	1	1	1	1	0	0	1	0	0
0	0	1	1	1	1	1	1	1	0	0	0	1
0	0	0	0	1	1	1	1	0	0	1	0	0
1	0	1	1	1	1	1	1	0	1	0	0	0
0	0	0	0	1	1	1	1	0	0	1	0	1
0	0	0	0	0	1	1	1	0	1	0	0	0
1	0	0	0	1	1	1	1	1	0	0	0	0
0	0	0	0	1	1	1	1	0	0	0	1	0
1	0	0	0	1	1	0	0	0	0	0	1	1
0	0	0	1	1	1	1	1	0	0	0	1	1
0	0	0	1	1	1	1	1	0	0	1	0	1
0	0	0	1	1	1	1	1	1	0	0	0	0
1	0	0	0	1	1	1	1	1	0	0	0	0
0	0	0	0	1	1	1	1	0	0	0	1	1
1	0	0	0	1	1	1	1	0	0	0	1	1
0	0	0	0	1	1	1	1	0	0	1	0	0
0	0	0	1	1	1	1	1	0	0	1	0	0
1	0	0	0	1	1	1	1	0	1	0	0	0
0	0	0	0	0	1	1	1	0	0	0	1	1
0	0	0	0	1	1	1	1	0	0	0	1	0
0	0	0	0	1	1	1	1	0	0	1	0	0
0	0	0	0	1	1	1	1	0	0	1	0	0
0	0	0	0	0	1	1	1	0	1	0	0	0
1	0	0	0	0	1	1	1	1	0	0	0	1
0	0	0	0	0	1	1	1	1	0	0	0	0
0	0	0	0	1	1	1	1	0	1	0	0	1
0	0	0	0	0	1	1	1	1	0	0	0	0
0	0	0	0	1	1	1	1	0	0	0	1	1
1	0	0	0	1	1	1	1	0	0	1	0	0
1	0	0	0	1	1	1	1	0	0	0	1	0
0	0	0	1	1	1	1	1	0	0	0	1	1
0	0	0	0	1	1	1	1	1	0	0	0	0
0	0	0	0	1	1	1	1	0	0	0	1	1
0	0	0	0	0	1	1	1	0	0	0	1	0
0	0	1	1	1	1	1	1	0	0	1	0	0
1	0	0	1	1	1	1	1	0	0	1	0	1
0	0	0	0	1	1	1	1	1	0	0	0	0
0	0	0	0	0	1	1	1	1	0	0	0	0
0	0	0	0	1	1	1	1	0	0	0	1	1
0	0	0	0	0	1	1	1	1	0	0	0	0
0	0	0	0	1	1	1	1	0	1	0	0	0
0	0	0	0	1	1	1	0	0	0	0	1	1
0	0	0	0	1	1	1	1	0	1	0	0	0
0	1	1	1	1	1	1	1	1	0	0	0	0
0	0	0	0	1	1	1	1	0	0	0	1	0
0	0	0	1	1	1	1	1	0	0	0	1	0
0	0	0	0	1	1	1	1	1	0	0	0	1
0	0	0	0	1	1	1	1	1	0	0	0	1
0	0	0	0	1	1	0	0	0	0	0	1	0
0	0	0	0	1	1	0	0	0	0	0	1	0
0	0	0	0	0	1	1	1	0	1	0	0	0
0	0	0	0	1	1	1	1	0	0	0	1	1
0	0	0	0	1	1	1	1	0	0	0	1	1
0	0	0	1	1	1	1	1	1	0	0	0	0
0	1	1	1	1	1	1	0	0	1	0	0	1
1	0	0	0	1	1	1	1	1	0	0	0	0
1	0	0	0	1	1	1	1	0	0	1	0	0
0	0	0	0	1	1	1	1	0	0	0	1	1
0	0	0	0	1	1	1	1	0	0	0	1	0
0	0	1	1	1	1	1	1	0	0	1	0	1
1	0	0	1	1	1	1	1	0	1	0	0	1
0	0	0	0	1	1	1	1	0	0	1	0	1
1	0	0	0	1	1	1	1	1	0	0	0	0
0	0	1	1	1	1	1	0	0	1	0	0	1
1	0	1	1	1	1	1	0	0	0	0	1	1
0	0	1	1	1	1	1	1	1	0	0	0	0
0	0	0	0	1	1	1	1	0	1	0	0	0
0	1	1	1	1	1	1	1	0	1	0	0	1
0	0	0	0	1	1	1	1	0	0	1	0	1
0	0	0	0	1	1	1	1	1	0	0	0	0
0	0	0	0	1	1	1	1	0	0	0	1	0
0	0	0	0	1	1	1	1	0	0	1	0	0
1	0	0	0	1	1	1	1	0	0	1	0	0
0	1	1	1	1	1	1	1	1	0	0	0	0
0	1	1	1	1	1	1	0	1	0	0	0	0
1	0	0	0	0	1	1	1	1	0	0	0	0
1	0	1	1	1	1	1	1	1	0	0	0	1
1	0	0	0	0	1	1	1	1	0	0	0	0
0	0	0	1	1	1	1	1	1	0	0	0	0
0	0	0	1	1	1	1	1	1	0	0	0	1
0	0	0	0	1	1	1	1	0	0	0	1	1
0	1	1	1	1	1	0	0	0	0	1	0	1
1	0	1	1	1	1	1	1	0	1	0	0	0
0	0	0	0	1	1	1	1	0	0	1	0	0
1	0	0	0	1	1	1	1	0	0	1	0	0
1	0	0	1	1	1	1	1	1	0	0	0	0
0	0	0	0	1	1	1	1	0	0	0	1	0
0	0	0	0	0	1	1	1	0	0	1	0	1
0	0	0	0	1	1	1	1	1	0	0	0	0
0	0	0	0	1	1	1	1	0	0	1	0	0
0	0	0	0	1	1	1	1	0	0	1	0	1
0	0	0	0	0	1	1	1	0	1	0	0	0
0	0	0	0	0	1	1	1	0	0	0	1	1
0	0	0	0	1	1	1	1	0	0	1	0	0
0	1	1	1	1	1	1	1	1	0	0	0	1
0	0	0	1	1	1	1	1	0	1	0	0	1
0	0	0	0	1	1	1	1	0	0	1	0	1
0	0	0	0	1	1	1	1	0	0	0	1	0
0	1	1	1	1	1	1	1	0	1	0	0	1
0	0	0	0	1	1	1	1	0	0	0	1	0
0	0	1	1	1	1	1	1	1	0	0	0	1
0	0	0	0	1	1	1	1	0	0	0	1	1
0	0	0	0	1	1	1	1	0	0	1	0	0
0	0	0	0	1	1	1	1	0	0	0	1	1
0	0	1	1	1	1	1	1	1	0	0	0	0
0	0	0	0	1	1	1	1	0	1	0	0	1
0	0	0	0	0	1	1	1	0	0	1	0	0
1	1	1	1	1	1	1	1	1	0	0	0	0
0	1	1	1	1	1	1	1	0	1	0	0	0
0	0	1	1	1	1	1	0	0	0	0	1	1
0	0	0	0	0	1	1	1	1	0	0	0	0
0	0	0	0	1	0	1	0	0	0	0	1	1
0	0	0	0	1	1	1	1	0	0	0	1	0
0	0	0	0	1	1	1	1	0	0	1	0	1
1	0	0	0	1	1	1	1	0	0	0	1	0
0	0	1	1	1	1	1	1	1	0	0	0	0
0	0	0	1	1	1	1	1	1	0	0	0	0
0	0	0	0	1	1	1	1	1	0	0	0	1
0	0	0	0	1	1	1	1	0	0	1	0	1
1	0	0	0	1	1	1	1	1	0	0	0	0
0	0	1	1	1	1	0	0	0	0	0	1	1
0	0	0	0	1	1	1	1	1	0	0	0	0
0	1	1	1	1	1	1	1	1	0	0	0	1
1	0	0	0	0	1	1	1	1	0	0	0	0
0	0	0	0	0	1	1	1	1	0	0	0	0
0	0	0	0	1	1	1	1	0	0	0	1	0
0	1	1	1	1	1	1	1	1	0	0	0	1
0	0	0	0	0	1	1	1	0	0	0	1	0
0	0	0	1	1	1	1	1	0	0	0	1	0
0	0	1	1	1	1	0	0	0	0	1	0	1
0	0	0	0	0	1	1	1	0	0	0	1	1
0	0	0	0	1	1	1	1	0	0	1	0	1
0	1	1	1	1	1	0	0	0	0	1	0	0
1	0	0	0	1	1	1	1	1	0	0	0	0
1	0	1	1	1	1	1	1	0	0	1	0	1
1	0	1	1	1	1	1	1	0	1	0	0	0
0	0	0	0	1	1	1	1	0	1	0	0	0
1	1	1	1	1	1	1	1	1	0	0	0	1
0	0	0	0	1	1	1	1	1	0	0	0	0
0	0	1	1	1	1	1	1	1	0	0	0	0
0	0	0	0	1	1	1	1	0	0	1	0	1
0	0	0	0	1	1	1	1	0	1	0	0	1
0	0	0	0	1	1	1	1	1	0	0	0	0
1	0	0	0	1	1	1	1	1	0	0	0	0
0	0	0	0	0	1	1	1	0	1	0	0	0
0	0	0	0	1	1	1	1	0	0	1	0	0
1	0	0	1	1	1	1	1	0	0	1	0	0
0	0	0	0	1	1	0	0	0	0	0	1	1
0	0	1	1	1	1	1	0	0	1	0	0	0
0	0	0	0	1	1	1	1	0	0	1	0	0
1	0	0	0	1	1	1	1	0	1	0	0	1
0	0	0	0	1	1	1	1	1	0	0	0	0
0	1	1	1	1	1	0	0	0	0	1	0	1
0	0	0	0	1	1	1	1	1	0	0	0	0
0	0	0	0	1	1	1	1	1	0	0	0	0
1	1	1	1	1	1	1	0	1	0	0	0	0
0	0	0	0	0	1	1	1	1	0	0	0	0
0	1	1	1	1	1	1	1	0	0	1	0	0
0	0	0	1	1	1	1	0	0	0	0	1	1
0	1	1	1	1	1	1	1	1	0	0	0	0
1	0	1	1	1	1	1	1	1	0	0	0	1
0	0	0	0	0	1	1	1	0	0	1	0	0
0	0	0	0	1	1	1	0	0	0	1	0	0
1	0	0	0	0	1	1	1	1	0	0	0	0
0	0	1	1	1	0	1	0	0	0	1	0	1
0	0	0	0	1	1	1	1	0	0	1	0	1
1	1	1	1	1	0	1	0	0	1	0	0	0
0	0	0	0	1	1	1	1	0	1	0	0	0
0	0	0	0	1	1	1	1	1	0	0	0	0
0	1	1	1	1	1	0	0	0	1	0	0	0
0	1	1	1	1	1	1	1	0	0	1	0	1
0	1	1	1	1	1	1	1	0	0	0	1	1
0	0	1	1	1	1	1	1	1	0	0	0	1
0	0	0	0	1	1	1	1	0	1	0	0	0
1	0	0	0	0	1	1	1	0	1	0	0	1
0	0	0	0	1	1	1	1	1	0	0	0	1
0	0	0	1	1	1	1	1	0	0	0	1	1
1	0	0	0	0	1	1	1	0	1	0	0	0
1	0	0	1	1	1	1	1	1	0	0	0	0
0	0	0	0	1	1	1	1	0	1	0	0	0
0	0	0	0	1	1	1	1	0	1	0	0	0
0	0	1	1	1	1	1	1	0	1	0	0	0
0	0	0	1	1	0	0	0	0	0	0	1	1
0	1	1	1	1	1	1	1	0	0	0	1	1
0	1	1	1	1	1	1	1	0	0	1	0	0
0	0	0	0	1	1	1	1	0	0	0	1	1
0	0	0	0	1	1	1	1	0	0	1	0	0
0	0	0	0	0	1	1	1	0	0	1	0	0
0	0	0	0	1	1	1	1	0	0	0	1	0
0	0	0	0	0	0	1	0	0	0	0	1	1
1	0	0	0	0	1	1	1	1	0	0	0	0
0	0	0	1	1	1	1	1	0	0	0	1	1
0	0	0	0	1	1	1	1	0	0	0	1	0
0	0	0	0	1	1	1	1	0	0	1	0	0
1	0	0	0	1	1	1	1	1	0	0	0	0
0	0	0	0	1	1	1	1	0	0	0	1	1
0	0	0	0	1	1	1	1	0	0	0	1	1
0	0	0	0	1	0	1	0	0	0	1	0	0
0	1	1	1	1	1	1	0	1	0	0	0	1
0	0	0	1	1	1	1	0	0	0	0	1	0
0	0	0	1	1	1	1	1	1	0	0	0	0
0	0	0	0	0	1	1	1	0	0	1	0	0
0	0	0	0	0	1	1	1	0	0	0	1	0
0	0	0	1	1	1	1	1	0	0	0	1	1
0	0	0	0	0	1	1	1	0	0	0	1	1
0	0	0	0	1	1	1	1	0	0	1	0	0
0	0	0	0	0	1	1	1	0	0	0	1	0
0	0	1	1	1	1	1	1	0	1	0	0	0
1	0	0	0	1	1	1	1	1	0	0	0	0
0	0	0	0	0	1	1	1	1	0	0	0	0
1	1	1	1	1	1	1	1	1	0	0	0	0
1	0	0	1	1	1	1	1	0	1	0	0	1
0	0	0	0	0	1	1	1	0	0	0	1	0
0	0	0	1	1	1	1	1	1	0	0	0	1
0	1	1	1	1	1	1	1	1	0	0	0	0
0	0	1	1	1	1	1	1	1	0	0	0	0
1	0	0	0	0	1	1	1	0	0	1	0	0
0	0	0	0	1	1	1	1	0	0	0	1	1
0	1	1	1	1	1	1	1	0	1	0	0	1
0	0	0	0	1	1	1	1	0	0	0	1	1
0	0	0	0	1	1	1	1	0	1	0	0	0
0	1	1	1	1	1	1	1	1	0	0	0	1
0	0	0	0	1	1	1	1	1	0	0	0	1
0	0	0	0	1	1	1	1	0	0	0	1	0
0	0	0	0	0	1	1	1	0	0	0	1	1
0	1	1	1	1	1	1	1	0	0	1	0	0
0	0	0	0	0	1	1	1	0	1	0	0	1
0	0	0	0	1	1	1	1	1	0	0	0	0
0	0	0	0	0	1	1	1	0	1	0	0	1
0	0	0	1	1	1	1	1	0	0	1	0	0
0	0	0	1	1	1	1	1	0	0	1	0	0
0	0	0	1	1	1	0	0	0	0	1	0	1
0	0	0	0	1	1	1	1	1	0	0	0	0
0	0	0	0	1	1	1	1	0	0	1	0	0
1	0	0	1	1	1	1	1	0	0	1	0	1
0	1	1	1	1	1	1	0	0	1	0	0	1
0	0	0	0	1	1	1	1	0	0	1	0	0
1	0	1	1	1	1	1	1	1	0	0	0	0
0	0	0	0	1	1	1	1	1	0	0	0	0
0	0	0	1	1	1	1	1	0	0	1	0	1
0	1	1	1	1	0	1	0	0	1	0	0	1
0	0	0	0	1	1	1	1	0	0	1	0	1
0	0	0	1	1	1	1	1	0	1	0	0	1
0	0	0	0	0	1	1	1	0	0	0	1	0
1	0	0	0	0	1	1	1	0	0	1	0	0
0	0	0	0	1	1	1	1	0	1	0	0	0
0	0	0	0	1	1	1	1	0	0	0	1	0
0	0	0	1	1	1	1	1	1	0	0	0	0
0	0	0	0	1	1	1	1	0	0	0	1	0
1	0	0	0	1	1	1	1	0	0	1	0	1
0	0	0	0	1	1	1	1	1	0	0	0	1
0	1	1	1	1	1	1	0	1	0	0	0	1
0	0	0	1	1	1	1	1	0	0	0	1	1
1	0	0	0	0	1	1	1	0	0	0	1	0
0	0	0	1	1	1	1	1	0	1	0	0	1
0	0	0	0	1	1	1	1	0	0	1	0	1
0	0	0	0	0	1	1	1	0	0	0	1	1
0	0	0	0	1	1	1	1	0	1	0	0	1
1	0	0	0	1	1	1	1	0	0	0	1	1
0	0	0	0	0	1	1	1	0	0	0	1	1
0	0	0	1	1	0	0	0	0	0	0	1	1
0	0	0	0	1	1	1	1	0	0	0	1	0
0	0	0	0	0	1	1	1	0	0	1	0	0
0	0	0	0	1	1	1	1	1	0	0	0	0
0	0	1	1	1	0	0	0	0	0	0	1	0
0	0	0	0	0	1	1	1	0	0	0	1	1
0	0	0	0	1	1	1	0	0	0	0	1	1
1	0	0	1	1	0	1	0	0	0	0	1	1
0	0	0	0	0	1	1	1	0	0	1	0	0
0	0	0	0	0	1	1	1	0	0	0	1	1
0	0	0	1	1	1	1	0	0	1	0	0	1
0	0	0	0	1	1	1	1	0	1	0	0	0
0	1	1	1	1	1	1	1	0	1	0	0	1
0	0	0	0	0	1	1	1	1	0	0	0	0
0	0	1	1	1	1	1	1	1	0	0	0	0
0	0	0	0	1	1	1	1	0	0	1	0	0
0	0	0	0	1	1	1	1	0	0	1	0	0
0	0	0	0	1	1	1	1	0	0	0	1	1
0	0	0	0	0	1	1	1	1	0	0	0	0
0	0	0	0	1	1	1	1	0	0	0	1	1
0	0	0	0	0	1	1	1	0	1	0	0	1
0	0	0	0	1	1	1	1	1	0	0	0	0
0	0	0	0	0	1	1	1	0	1	0	0	0
0	0	0	0	1	1	1	1	0	0	1	0	0
1	0	0	1	1	1	1	0	0	0	0	1	1
0	1	1	1	1	1	1	0	0	0	1	0	1
0	0	0	0	0	1	1	1	0	0	0	1	1
0	0	0	1	1	1	1	1	0	1	0	0	0
1	0	0	0	1	1	1	1	1	0	0	0	0
0	0	0	0	1	1	1	1	0	0	0	1	1
0	0	0	0	1	1	1	1	1	0	0	0	1
0	0	0	0	0	1	1	1	1	0	0	0	0
0	0	0	0	1	1	1	1	0	0	0	1	1
1	0	0	0	0	1	1	1	1	0	0	0	0
0	0	0	0	1	1	1	1	1	0	0	0	0
1	1	1	1	1	1	1	1	0	0	1	0	1
0	0	0	0	1	1	1	1	0	0	0	1	1
0	0	0	1	1	1	1	1	0	1	0	0	1
0	0	0	1	1	1	1	1	0	0	0	1	1
0	0	0	0	0	1	1	1	0	0	0	1	0
0	0	0	0	0	1	1	1	0	0	0	1	1
0	0	0	1	1	1	1	1	0	0	1	0	0
0	0	0	0	0	1	1	1	0	1	0	0	0
0	0	0	0	1	1	1	1	0	1	0	0	0
0	0	0	0	0	1	1	1	0	0	0	1	0
1	0	0	0	1	1	1	1	0	0	0	1	0
0	0	0	0	0	1	1	1	0	0	0	1	0
1	0	0	1	1	1	1	1	1	0	0	0	0
1	0	0	0	0	1	1	1	1	0	0	0	0
0	0	0	0	1	1	1	1	0	0	0	1	0
0	0	0	0	1	1	1	1	0	0	1	0	0
0	0	0	0	1	1	1	1	0	0	1	0	0
1	0	0	0	1	1	1	1	0	0	0	1	0
0	0	0	1	1	1	1	1	1	0	0	0	0
0	0	0	0	0	1	1	1	0	0	0	1	1
0	0	0	0	1	1	1	1	0	0	0	1	1
0	0	1	1	1	1	1	1	1	0	0	0	0
0	0	0	0	0	1	1	1	0	1	0	0	1
0	0	0	0	0	1	1	1	1	0	0	0	1
0	0	0	0	0	1	1	1	0	0	0	1	0
0	1	1	1	1	1	1	1	1	0	0	0	1
0	0	0	1	1	1	1	1	0	0	0	1	1
0	0	1	1	1	1	1	1	1	0	0	0	0
0	1	1	1	1	1	1	1	1	0	0	0	0
0	0	0	0	1	1	0	0	0	0	0	1	0
0	0	0	1	1	1	0	0	0	1	0	0	1
0	0	0	0	1	1	1	1	1	0	0	0	0
0	0	0	1	1	1	0	0	0	0	0	1	1
0	0	0	0	1	1	1	1	0	1	0	0	1
0	1	1	1	1	1	1	1	1	0	0	0	1
0	0	0	0	1	1	1	1	0	1	0	0	0
0	0	0	1	1	1	1	1	1	0	0	0	0
0	0	0	0	1	0	0	0	0	0	0	1	0
0	0	0	0	1	1	1	1	1	0	0	0	0
0	0	0	0	1	1	1	1	0	0	0	1	1
0	0	0	1	1	1	1	0	0	0	0	1	1
0	0	1	1	1	0	1	0	0	0	0	1	1
0	1	1	1	1	1	1	1	1	0	0	0	1
0	0	0	0	1	1	1	1	0	1	0	0	0
0	0	0	0	1	1	1	1	0	0	0	1	1
0	0	0	0	1	1	1	1	0	0	1	0	1
0	0	0	0	1	1	1	1	0	0	1	0	1
0	0	0	0	1	1	1	1	0	1	0	0	0
0	0	1	1	1	1	1	1	0	0	1	0	0
0	0	0	0	1	1	1	1	0	0	0	1	0
0	0	0	0	0	1	1	1	0	0	0	1	0
0	0	0	1	1	1	1	0	0	0	1	0	0
1	0	0	0	1	1	1	1	1	0	0	0	0
0	0	0	0	1	1	1	1	0	0	1	0	1
0	1	1	1	1	1	0	0	0	0	1	0	1
0	0	0	0	0	1	1	1	0	1	0	0	0
0	0	1	1	1	1	0	0	0	0	1	0	1
0	0	0	0	0	1	1	1	0	0	1	0	0
0	0	0	0	1	1	1	1	1	0	0	0	0
0	0	0	0	1	1	1	1	0	1	0	0	0
0	0	0	0	1	0	1	0	0	0	0	1	1
1	0	0	0	1	1	1	1	1	0	0	0	0
0	0	1	1	1	1	1	1	0	1	0	0	0
0	0	0	1	1	1	1	1	0	0	1	0	1
0	0	0	0	1	1	1	1	0	0	0	1	0
0	0	1	1	1	1	1	1	0	0	0	1	0
0	0	0	1	1	1	1	1	0	0	0	1	1
0	0	0	0	1	1	1	1	0	0	0	1	0
1	0	0	0	1	1	1	1	0	0	0	1	1
0	0	0	0	1	1	1	1	1	0	0	0	0
0	0	0	0	1	1	1	1	0	0	0	1	0
0	0	0	1	1	1	1	1	0	0	0	1	0
1	0	0	1	1	1	1	1	1	0	0	0	0
0	0	0	0	0	1	1	1	0	1	0	0	0
1	0	0	0	0	1	1	1	0	0	1	0	1
0	0	0	0	0	1	1	1	0	0	0	1	1
0	0	0	0	1	1	1	1	0	0	0	1	1
0	0	0	0	0	1	1	1	1	0	0	0	1
1	0	0	0	1	1	1	1	1	0	0	0	0
0	0	0	0	1	1	1	0	0	0	0	1	1
1	0	1	1	1	1	1	1	1	0	0	0	0
0	1	1	1	1	1	1	1	0	1	0	0	0
0	0	0	0	1	1	1	1	1	0	0	0	1
0	0	0	1	1	0	1	0	0	0	0	1	1
0	0	0	0	1	1	1	1	1	0	0	0	0
0	0	0	0	1	1	1	1	0	1	0	0	0
0	1	1	1	1	0	1	0	0	0	0	1	1
0	0	0	0	1	1	1	1	0	0	0	1	0
0	0	1	1	1	1	1	1	1	0	0	0	0
1	1	1	1	1	1	1	1	1	0	0	0	0
0	0	0	1	1	1	1	1	1	0	0	0	0
0	1	1	1	1	1	1	1	1	0	0	0	1
0	0	0	0	1	1	1	1	0	1	0	0	0
1	0	0	1	1	1	1	0	1	0	0	0	0
0	1	1	1	1	0	1	0	0	1	0	0	0
0	0	0	0	1	1	1	1	0	0	1	0	1
0	0	0	0	1	1	1	1	0	0	1	0	1
0	0	0	0	0	1	1	1	0	0	0	1	1
0	0	0	0	1	1	1	1	1	0	0	0	0
0	0	1	1	1	1	1	1	0	0	0	1	1
1	0	0	0	1	1	1	1	0	1	0	0	0
0	0	0	0	1	1	1	1	0	1	0	0	1
0	0	0	0	1	1	1	1	0	1	0	0	0
0	0	0	0	1	1	1	1	0	0	0	1	1
1	0	0	0	0	1	1	1	1	0	0	0	0
0	0	0	0	1	1	1	1	0	0	1	0	0
0	0	0	0	1	1	1	1	0	0	0	1	1
0	0	0	0	1	1	1	1	1	0	0	0	0
0	0	1	1	1	1	1	0	1	0	0	0	1
0	0	0	0	1	1	1	1	0	1	0	0	0
0	0	0	1	1	1	1	1	0	0	0	1	1
0	0	0	0	0	1	1	1	1	0	0	0	0
0	0	0	0	1	1	1	1	0	0	1	0	1
0	0	0	0	1	1	1	1	0	0	0	1	0
0	0	0	0	0	1	1	1	0	0	0	1	1
1	0	1	1	1	1	1	1	0	0	1	0	0
1	1	1	1	1	1	1	1	1	0	0	0	0
1	1	1	1	1	1	1	1	0	0	1	0	1
0	0	0	0	1	1	1	1	0	1	0	0	0
0	0	0	0	1	1	1	1	1	0	0	0	0
0	0	0	0	0	1	1	1	0	0	0	1	1
0	0	1	1	1	1	1	1	0	0	0	1	1
0	0	0	0	1	1	1	1	1	0	0	0	0
0	1	1	1	1	1	0	0	0	0	0	1	1
0	0	0	1	1	1	1	1	0	0	1	0	1
0	0	0	0	1	1	1	1	0	0	0	1	0
0	0	0	1	1	1	1	1	0	1	0	0	0
0	0	1	1	1	1	0	0	0	0	1	0	1
0	0	0	0	1	1	1	1	1	0	0	0	0
0	0	0	1	1	1	0	0	0	0	0	1	1
1	0	0	0	1	1	1	1	1	0	0	0	1
0	1	1	1	1	1	1	1	1	0	0	0	0
1	0	0	0	0	1	1	1	0	0	0	1	1
1	0	0	0	0	1	1	1	1	0	0	0	1
0	1	1	1	1	1	1	0	1	0	0	0	0
1	1	1	1	1	1	1	1	1	0	0	0	0
0	0	0	0	1	1	1	1	1	0	0	0	0
0	0	0	1	1	1	1	1	0	1	0	0	1
0	0	1	1	1	1	1	1	0	0	1	0	1
0	0	0	0	1	1	1	1	0	0	1	0	1
0	0	0	0	1	1	1	1	0	0	0	1	1
1	0	0	0	1	1	1	1	0	0	0	1	0
1	0	0	0	1	1	1	1	0	1	0	0	0
0	0	1	1	1	1	1	1	0	0	0	1	0
0	0	0	0	1	1	1	1	0	0	1	0	1
0	0	0	0	1	1	1	1	1	0	0	0	1
0	0	1	1	1	1	1	1	0	1	0	0	1
1	0	0	0	1	1	1	1	0	0	0	1	1
0	0	0	0	1	1	1	1	0	0	0	1	1
0	0	0	0	1	1	1	1	0	1	0	0	1
0	0	0	0	1	1	1	1	0	0	0	1	1
0	0	0	0	0	1	1	1	0	0	0	1	0
0	1	1	1	1	1	0	0	0	0	1	0	0
0	0	0	0	1	1	1	0	0	1	0	0	1
0	0	1	1	1	1	1	1	0	0	1	0	1
0	0	0	0	0	1	1	1	0	0	1	0	1
0	0	0	0	1	1	1	1	1	0	0	0	0
1	0	0	0	1	1	1	1	1	0	0	0	0
0	0	0	0	0	1	1	1	0	1	0	0	0
0	0	0	0	0	1	1	1	1	0	0	0	0
0	1	1	1	1	1	1	1	1	0	0	0	0
0	0	0	0	1	1	1	1	0	0	0	1	0
0	0	0	0	1	1	1	1	0	0	0	1	1
0	0	0	0	1	1	1	1	0	0	0	1	0
0	0	0	0	0	1	1	1	1	0	0	0	0
1	0	0	0	1	1	1	1	1	0	0	0	0
1	0	0	0	0	1	1	1	0	0	1	0	0
0	0	0	1	1	1	1	1	1	0	0	0	0
0	0	0	0	1	1	1	1	1	0	0	0	1
0	0	0	0	0	1	1	1	0	0	0	1	1
0	1	1	1	1	1	1	0	0	0	1	0	0
1	0	0	0	1	1	1	1	1	0	0	0	0
1	0	0	0	1	1	1	0	0	0	0	1	1
0	0	0	0	1	1	1	1	0	0	0	1	1
0	1	1	1	1	1	1	0	0	0	1	0	1
0	0	0	1	1	1	1	1	0	0	1	0	0
0	1	1	1	1	1	1	0	1	0	0	0	1
0	0	0	0	0	1	1	1	0	0	1	0	1
0	0	0	0	1	1	1	1	0	0	0	1	1
1	0	0	0	1	1	1	1	0	0	1	0	0
0	0	0	0	1	1	1	1	0	0	0	1	0
0	0	0	0	1	1	0	0	0	0	0	1	0
0	0	0	0	1	1	1	1	0	0	0	1	1
0	0	0	0	0	1	1	1	0	0	1	0	0
0	0	0	0	1	1	1	1	0	0	1	0	1
0	1	1	1	1	0	1	0	0	0	1	0	0
0	0	0	0	1	1	1	1	0	0	0	1	1
0	0	0	0	0	1	1	1	0	0	1	0	1
0	0	0	0	0	1	1	1	0	0	0	1	1
0	0	0	0	1	1	1	1	0	0	1	0	0
0	0	1	1	1	1	1	1	0	1	0	0	0
0	0	0	0	1	1	1	1	0	1	0	0	0
0	0	0	0	1	1	1	1	1	0	0	0	0
0	0	0	0	1	1	1	1	0	0	0	1	0
0	0	0	1	1	1	1	1	0	0	0	1	1
0	0	0	0	1	1	0	0	0	0	0	1	1
0	0	0	0	1	1	1	1	0	1	0	0	0
1	0	0	0	0	1	1	1	0	0	0	1	1
0	0	0	0	0	1	1	1	0	1	0	0	0
0	0	0	1	1	1	0	0	0	0	0	1	0
0	0	0	0	1	1	1	1	1	0	0	0	0
0	0	1	1	1	1	1	1	1	0	0	0	0
1	0	0	0	1	1	1	1	0	0	1	0	0
0	0	1	1	1	1	1	1	1	0	0	0	1
0	0	0	0	0	1	1	1	0	0	0	1	1
0	0	0	0	1	1	1	1	1	0	0	0	0
0	0	1	1	1	1	1	1	0	1	0	0	0
0	0	0	1	1	1	1	1	0	1	0	0	1
0	0	0	0	0	1	1	1	1	0	0	0	0
0	0	0	0	1	1	1	1	1	0	0	0	1
0	0	1	1	1	1	1	1	0	1	0	0	0
0	1	1	1	1	1	1	1	1	0	0	0	0
0	0	0	1	1	1	1	1	1	0	0	0	1
0	0	0	0	0	1	1	1	1	0	0	0	0
0	0	0	0	1	1	1	1	0	0	1	0	0
0	1	1	1	1	1	1	1	0	1	0	0	0
1	0	0	0	1	1	1	1	0	1	0	0	0
0	0	1	1	1	1	1	1	1	0	0	0	0
0	0	0	0	1	1	1	1	0	0	0	1	1
0	0	0	0	1	1	1	1	0	1	0	0	0
0	1	1	1	1	1	0	0	0	1	0	0	1
0	0	0	0	1	1	1	1	1	0	0	0	1
1	0	0	0	1	1	1	1	0	0	0	1	1
0	0	0	0	0	1	1	1	0	0	1	0	0
1	0	0	0	1	1	1	1	0	1	0	0	0
0	0	1	1	1	1	1	0	0	0	0	1	1
0	0	1	1	1	1	1	1	1	0	0	0	0
0	0	0	0	1	1	1	1	1	0	0	0	0
0	0	0	1	1	1	1	1	1	0	0	0	0
0	0	0	0	0	1	1	1	0	0	0	1	0
0	0	0	0	1	1	0	0	0	0	0	1	1
0	0	1	1	1	1	1	1	1	0	0	0	0
1	1	1	1	1	1	1	1	1	0	0	0	0
0	0	0	0	1	1	1	1	1	0	0	0	0
0	0	0	0	1	1	1	1	0	0	0	1	1
0	1	1	1	1	1	1	1	1	0	0	0	1
1	0	0	0	0	1	1	1	1	0	0	0	0
0	0	0	1	1	1	1	1	0	1	0	0	0
0	0	0	1	1	1	0	0	0	0	0	1	1
1	0	0	1	1	1	1	1	0	1	0	0	0
0	0	0	0	0	1	1	1	0	0	0	1	0
0	0	0	0	1	1	0	0	0	0	0	1	0
1	0	0	0	1	1	1	1	1	0	0	0	0
0	1	1	1	1	1	1	0	1	0	0	0	1
1	0	0	0	1	1	1	1	0	0	1	0	0
0	0	1	1	1	1	1	1	0	0	1	0	1
0	0	0	1	1	1	1	1	0	0	0	1	1
1	0	0	0	1	1	1	1	0	0	0	1	1
0	1	1	1	1	1	1	1	0	1	0	0	1
1	0	1	1	1	1	1	1	1	0	0	0	0
1	1	1	1	1	1	1	1	0	1	0	0	1
1	0	1	1	1	1	1	1	1	0	0	0	0
0	0	0	0	1	1	1	1	0	0	1	0	0
0	0	0	0	0	1	1	1	0	0	0	1	1
1	0	0	0	0	1	1	1	1	0	0	0	0
1	0	1	1	1	1	1	1	1	0	0	0	0
0	0	0	0	1	1	1	0	0	0	0	1	1
0	0	0	1	1	1	1	1	0	0	0	1	0
0	0	1	1	1	1	1	1	0	0	1	0	0
0	0	0	0	1	1	1	1	0	0	0	1	1
0	0	0	1	1	1	1	1	0	0	1	0	0
0	0	0	0	1	1	1	1	0	1	0	0	0
0	0	0	0	1	1	1	1	0	1	0	0	1
0	0	0	0	1	1	1	1	1	0	0	0	0
0	0	0	0	1	1	1	1	1	0	0	0	0
0	0	0	0	1	1	1	1	0	0	0	1	1
0	0	0	1	1	1	1	1	1	0	0	0	0
0	0	0	0	1	1	1	1	1	0	0	0	0
0	0	0	0	1	1	1	1	0	0	0	1	0
1	0	0	0	1	1	1	1	0	0	0	1	0
0	0	0	1	1	1	1	1	0	1	0	0	1
0	1	1	1	1	1	0	0	0	0	1	0	1
0	1	1	1	1	1	1	1	1	0	0	0	1
0	0	0	0	0	1	1	1	0	0	0	1	0
0	0	0	0	0	1	1	1	1	0	0	0	0
0	0	0	0	1	1	1	1	1	0	0	0	0
1	0	0	0	1	1	1	1	0	0	1	0	0
0	0	0	0	1	1	1	1	1	0	0	0	0
0	0	1	1	1	1	0	0	0	1	0	0	1
0	0	0	0	1	1	1	1	0	0	1	0	0
0	0	0	1	1	1	1	1	1	0	0	0	1
0	0	0	0	1	1	1	0	0	0	0	1	1
1	0	1	1	1	1	1	1	1	0	0	0	0
0	0	0	0	0	1	1	1	1	0	0	0	0
0	0	0	0	1	1	1	1	1	0	0	0	0
0	0	0	1	1	1	1	1	0	0	1	0	1
0	1	1	1	1	1	1	0	1	0	0	0	0
1	0	0	1	1	1	1	1	0	1	0	0	1
1	0	0	0	1	1	1	1	0	1	0	0	0
0	0	0	0	0	1	1	1	1	0	0	0	0
0	0	0	0	1	1	1	1	0	0	1	0	0
0	0	0	0	1	1	1	1	0	0	1	0	1
1	0	0	0	1	1	1	1	1	0	0	0	0
0	0	0	0	1	1	1	1	1	0	0	0	0
0	0	0	0	1	1	1	1	0	0	1	0	0
0	0	0	0	1	1	1	1	0	0	0	1	1
1	1	1	1	1	0	0	0	0	1	0	0	1
0	0	0	1	1	1	1	1	0	1	0	0	1
0	0	0	0	1	1	1	1	0	0	0	1	0
0	0	0	0	1	1	1	1	0	0	0	1	0
0	0	0	1	1	1	1	0	1	0	0	0	0
0	0	0	0	1	1	1	1	1	0	0	0	0
0	0	0	1	1	1	1	1	0	0	0	1	0
0	0	0	0	1	1	1	1	0	0	0	1	1
0	0	0	0	1	1	1	1	1	0	0	0	0
1	0	0	0	1	1	1	1	0	1	0	0	1
0	0	0	0	1	1	1	1	0	0	0	1	1
0	0	0	0	1	1	0	0	0	0	0	1	0
0	0	0	0	1	1	1	1	0	1	0	0	1
1	0	0	0	1	1	1	1	1	0	0	0	1
0	0	0	0	1	1	1	1	1	0	0	0	0
0	0	0	0	0	1	1	1	0	0	1	0	0
0	0	0	1	1	1	1	1	0	0	1	0	1
1	0	1	1	1	1	1	1	0	1	0	0	0
0	0	0	0	1	1	1	1	0	0	1	0	0
0	0	0	0	1	1	1	1	0	0	0	1	1
0	0	0	0	1	1	1	1	1	0	0	0	0
0	1	1	1	1	1	1	1	1	0	0	0	1
0	0	0	0	1	0	1	0	0	0	0	1	0
0	0	0	1	1	1	0	0	0	0	1	0	1
0	0	0	0	0	0	1	0	0	0	0	1	1
0	1	1	1	1	1	1	0	0	1	0	0	1
0	0	0	0	0	0	1	0	0	0	0	1	1
0	0	0	1	1	1	1	1	0	0	0	1	1
0	0	0	0	0	1	1	1	0	0	0	1	1
0	0	0	0	1	1	1	1	0	0	0	1	0
0	0	0	0	0	1	1	1	0	0	0	1	0
0	0	0	0	1	1	1	1	0	1	0	0	1
0	0	0	0	1	1	1	1	0	0	1	0	0
0	0	0	0	1	1	1	1	0	0	0	1	1
0	0	0	0	1	1	1	1	0	0	1	0	0
0	0	0	0	0	1	1	1	1	0	0	0	0
0	1	1	1	1	1	1	0	0	1	0	0	1
0	0	0	1	1	1	1	1	0	0	0	1	1
1	0	0	0	1	1	1	1	0	1	0	0	1
0	1	1	1	1	1	1	0	0	1	0	0	0
0	1	1	1	1	1	0	0	0	1	0	0	1
0	0	1	1	1	1	0	0	0	0	1	0	1
0	0	0	1	1	1	0	0	0	0	0	1	1
0	0	0	0	0	1	1	1	0	1	0	0	0
0	0	0	1	1	1	0	0	0	0	0	1	1
0	0	0	1	1	1	1	1	1	0	0	0	0
0	0	0	0	1	1	1	1	1	0	0	0	0
0	0	1	1	1	1	0	0	0	0	0	1	0
1	1	1	1	1	1	1	1	1	0	0	0	0
0	0	1	1	1	1	1	1	0	1	0	0	1
0	0	0	0	1	1	1	1	0	0	0	1	0
0	0	0	0	1	1	1	1	0	0	0	1	1
1	1	1	1	1	1	1	1	0	1	0	0	0
0	0	1	1	1	1	1	1	1	0	0	0	1
0	0	0	0	1	1	0	0	0	0	0	1	1
0	0	1	1	1	1	1	1	1	0	0	0	0
0	0	0	0	1	1	1	1	0	0	0	1	1
0	0	0	0	1	1	1	1	1	0	0	0	0
1	0	0	0	1	1	1	1	0	0	0	1	0
0	0	0	0	1	1	1	1	1	0	0	0	0
1	0	0	0	0	1	1	1	1	0	0	0	0
0	0	1	1	1	0	1	0	0	0	1	0	0
1	0	0	1	1	1	1	1	0	1	0	0	0
0	1	1	1	1	1	0	0	0	1	0	0	1
0	0	0	0	1	1	1	1	0	0	1	0	0
0	0	1	1	1	1	0	0	0	0	0	1	1
0	0	0	0	1	1	1	1	0	0	0	1	1
0	0	0	0	1	1	1	1	0	1	0	0	0
0	0	0	0	0	1	1	1	0	1	0	0	0
0	0	0	0	1	1	1	0	0	0	0	1	1
0	0	0	0	1	1	1	1	0	1	0	0	0
0	0	0	1	1	1	1	1	0	0	1	0	1
0	0	0	0	0	1	1	1	0	0	1	0	0
0	1	1	1	1	1	1	1	0	1	0	0	1
0	0	0	0	1	1	1	1	0	0	0	1	0
1	0	0	0	1	1	1	1	0	1	0	0	1
1	0	0	0	1	1	1	1	0	1	0	0	0
0	0	0	0	1	1	1	1	1	0	0	0	0
0	0	0	1	1	1	1	1	0	0	0	1	1
0	0	0	1	1	1	1	1	1	0	0	0	1
0	0	0	0	0	1	1	1	0	1	0	0	1
0	0	0	0	1	1	1	1	0	1	0	0	0
1	0	0	0	0	1	1	1	0	1	0	0	0
0	0	0	0	1	1	1	1	0	0	1	0	1
0	0	0	0	1	1	1	1	0	0	1	0	1
0	0	0	1	1	1	1	1	0	0	0	1	1
0	0	0	0	1	1	1	1	1	0	0	0	1
1	0	0	0	1	1	1	1	1	0	0	0	0
0	0	0	0	1	1	1	1	1	0	0	0	1
0	0	0	1	1	1	1	1	0	0	0	1	0
1	0	0	0	1	1	1	0	0	0	1	0	0
1	0	0	0	0	1	1	1	1	0	0	0	0
0	0	1	1	1	1	1	1	1	0	0	0	0
0	0	0	0	1	1	1	1	0	1	0	0	0
0	0	0	0	1	1	1	1	0	1	0	0	0
0	0	0	0	1	1	1	0	0	0	0	1	1
0	1	1	1	1	1	1	1	0	1	0	0	1
0	0	0	0	1	1	1	1	0	0	1	0	1
0	0	0	1	1	1	1	1	1	0	0	0	0
0	0	0	0	0	1	1	1	0	1	0	0	0
0	0	0	0	1	1	1	1	0	0	0	1	1
1	0	0	0	0	1	1	1	0	1	0	0	1
0	0	0	0	0	1	1	1	0	0	1	0	1
0	0	1	1	1	1	1	1	0	0	1	0	1
0	0	0	0	1	1	1	1	0	0	0	1	1
0	0	0	0	0	1	1	1	0	0	1	0	0
0	0	0	0	1	1	1	1	0	0	1	0	0
0	0	0	0	1	1	1	1	1	0	0	0	0
0	0	1	1	1	1	1	1	0	0	0	1	1
0	0	0	0	1	1	1	1	0	0	0	1	1
0	0	0	0	1	1	1	1	0	1	0	0	0
1	0	0	0	0	1	1	1	1	0	0	0	0
0	0	0	0	0	1	1	1	1	0	0	0	0
0	0	0	0	1	1	1	1	0	1	0	0	0
1	0	0	0	1	1	1	1	0	1	0	0	0
1	0	0	0	1	1	1	1	1	0	0	0	1
0	0	0	0	1	1	1	1	0	0	0	1	1
0	0	0	0	1	1	1	1	0	0	0	1	1
0	0	0	1	1	1	1	1	0	0	1	0	0
0	0	0	0	1	1	1	1	0	0	0	1	1
0	0	0	0	1	1	1	1	1	0	0	0	0
0	0	0	1	1	1	1	1	0	1	0	0	0
0	1	1	1	1	1	1	1	0	1	0	0	0
0	0	0	1	1	1	1	1	0	0	1	0	1
0	0	1	1	1	0	0	0	0	0	0	1	1
1	0	0	1	1	1	1	1	1	0	0	0	0
0	1	1	1	1	1	1	1	1	0	0	0	0
0	0	0	0	1	1	1	1	0	1	0	0	1
0	0	0	0	1	1	1	1	1	0	0	0	1
0	0	0	0	1	1	1	1	0	0	0	1	1
0	0	0	0	1	1	1	1	0	0	1	0	0
0	0	0	0	1	1	1	1	0	0	0	1	0
0	0	1	1	1	1	1	1	1	0	0	0	0
1	1	1	1	1	1	0	0	1	0	0	0	1
0	0	0	0	0	1	1	1	1	0	0	0	0
0	0	0	0	1	1	1	1	0	0	0	1	1
0	0	1	1	1	1	1	1	1	0	0	0	0
1	1	1	1	1	1	1	1	1	0	0	0	1
0	0	1	1	1	1	1	1	0	0	1	0	1
0	0	0	0	1	1	1	1	0	1	0	0	0
0	0	0	0	1	1	1	1	0	0	0	1	1
1	0	1	1	1	1	1	1	0	0	1	0	1
0	0	0	0	1	1	1	0	0	0	0	1	1
0	0	0	0	0	1	1	1	0	0	0	1	1
0	1	1	1	1	1	1	1	0	0	1	0	1
0	0	0	0	1	1	1	1	0	0	1	0	0
0	0	0	1	1	1	1	1	1	0	0	0	1
1	1	1	1	1	1	1	1	1	0	0	0	0
0	0	0	0	0	1	1	1	0	0	0	1	1
0	0	0	0	1	1	1	1	1	0	0	0	0
1	0	1	1	1	1	1	1	0	0	0	1	0
0	0	0	0	1	1	1	1	0	1	0	0	0
0	0	0	0	1	1	1	1	0	0	0	1	1
0	1	1	1	1	1	1	1	0	1	0	0	1
0	0	0	1	1	1	1	1	1	0	0	0	0
0	0	0	0	1	1	1	1	0	0	0	1	1
1	0	0	0	1	1	1	1	0	0	1	0	0
0	0	1	1	1	1	1	1	0	0	1	0	1
0	0	0	0	1	0	1	0	0	0	0	1	0
0	0	0	0	0	1	1	1	0	1	0	0	0
0	0	0	0	1	1	1	1	0	0	0	1	1
0	0	0	0	1	1	1	1	1	0	0	0	0
0	1	1	1	1	1	1	0	1	0	0	0	1
1	0	0	0	1	1	1	1	0	0	0	1	1
1	0	1	1	1	1	1	1	1	0	0	0	0
0	0	0	0	1	1	1	1	0	0	1	0	0
0	0	0	0	1	1	1	1	1	0	0	0	0
0	0	0	0	1	1	1	1	0	0	0	1	1
0	0	0	0	0	1	1	1	0	0	0	1	0
0	0	0	0	1	1	1	1	0	0	0	1	1
0	0	0	0	1	1	1	1	0	0	1	0	1
0	0	0	1	1	1	1	1	0	1	0	0	1
0	0	0	1	1	1	1	1	0	0	1	0	0
0	0	1	1	1	1	1	1	0	0	1	0	0
1	0	0	0	1	1	1	1	0	0	1	0	0
0	0	0	0	1	1	1	1	0	0	0	1	0
0	0	0	0	0	1	1	1	1	0	0	0	0
0	1	1	1	1	1	1	0	0	1	0	0	1
0	0	0	0	0	1	1	1	0	1	0	0	0
0	0	0	0	1	1	1	1	0	1	0	0	0
0	0	0	0	1	1	1	1	0	0	1	0	0
0	1	1	1	1	1	1	1	0	1	0	0	1
0	0	0	0	1	1	1	1	0	0	0	1	0
0	0	0	1	1	1	1	1	0	0	1	0	0
0	0	0	0	1	1	1	1	1	0	0	0	0
0	0	0	0	1	1	0	0	0	0	0	1	1
0	0	0	0	1	1	1	1	0	0	0	1	1
0	0	0	0	1	1	1	1	0	1	0	0	0
0	0	0	0	1	1	1	1	0	0	0	1	1
0	1	1	1	1	0	1	0	0	1	0	0	1
0	0	0	0	0	1	1	1	0	1	0	0	0
0	0	0	0	0	1	1	1	1	0	0	0	0
0	0	0	0	0	1	1	1	1	0	0	0	1
0	0	0	1	1	1	1	1	0	1	0	0	0
0	0	0	0	1	0	0	0	0	0	0	1	1
1	0	0	0	0	1	1	1	1	0	0	0	0
1	0	0	1	1	1	1	0	0	0	1	0	0
0	0	0	1	1	0	0	0	0	0	1	0	0
0	0	0	0	0	1	1	1	0	1	0	0	1
0	0	0	1	1	1	1	1	1	0	0	0	0
1	0	0	0	0	1	1	1	0	0	0	1	0
0	0	0	0	1	1	1	1	0	0	0	1	1
0	0	0	0	0	1	1	1	0	0	0	1	0
0	0	0	0	1	1	1	1	1	0	0	0	1
1	0	0	1	1	1	1	1	0	0	0	1	1
0	0	0	0	1	1	1	1	1	0	0	0	0
0	0	0	1	1	1	1	1	0	1	0	0	0
0	0	0	0	1	1	1	1	0	0	1	0	1
0	0	0	0	1	0	1	0	0	0	0	1	1
0	0	0	0	0	1	1	1	0	0	1	0	0
0	0	0	0	1	1	1	1	0	1	0	0	0
0	0	0	0	1	1	1	1	0	0	0	1	0
0	0	1	1	1	1	1	1	0	1	0	0	0
0	0	0	0	0	1	1	1	0	0	1	0	0
0	0	0	0	1	1	1	1	0	1	0	0	1
0	0	0	0	1	1	1	1	1	0	0	0	1
1	0	0	0	0	1	1	1	1	0	0	0	0
1	1	1	1	1	1	1	1	1	0	0	0	0
0	0	0	0	0	1	1	1	0	0	0	1	1
0	0	0	1	1	1	1	1	0	1	0	0	1
0	0	0	0	1	1	1	1	1	0	0	0	0
1	0	0	0	1	1	1	1	1	0	0	0	0
0	0	0	0	1	1	1	1	0	0	1	0	1
0	0	0	0	1	1	1	1	0	0	1	0	0
0	0	0	0	1	1	1	1	0	0	0	1	1
0	0	1	1	1	1	1	1	1	0	0	0	0
1	0	0	0	1	1	1	1	1	0	0	0	0
1	0	0	1	1	1	1	1	0	0	0	1	1
1	0	0	0	0	1	1	1	0	0	0	1	1
0	0	0	0	1	1	1	1	0	0	0	1	0
0	0	0	0	1	1	1	1	0	0	1	0	0
1	0	0	0	1	1	1	1	1	0	0	0	0
0	0	0	0	1	1	1	1	1	0	0	0	0
0	0	0	0	0	1	1	1	1	0	0	0	0
0	0	0	0	0	1	1	1	0	0	1	0	0
0	0	0	0	0	1	1	1	0	0	0	1	0
0	1	1	1	1	1	1	1	0	0	0	1	1
0	1	1	1	1	1	1	1	1	0	0	0	1
0	0	0	1	1	1	1	1	1	0	0	0	1
1	0	0	1	1	1	1	1	0	1	0	0	0
0	0	0	0	1	1	1	1	0	0	1	0	0
1	0	0	0	0	1	1	1	0	0	0	1	0
0	0	0	0	0	1	1	1	0	1	0	0	1
0	0	0	0	1	1	1	1	0	0	0	1	1
0	0	0	0	1	1	1	1	0	0	1	0	0
0	0	0	0	1	1	1	1	0	1	0	0	0
0	0	0	0	1	1	1	1	0	0	0	1	1
0	0	0	0	1	1	1	1	1	0	0	0	0
0	0	0	0	0	1	1	1	0	0	1	0	0
0	0	0	0	1	1	1	1	0	1	0	0	0
0	0	0	1	1	1	1	1	1	0	0	0	0
1	0	1	1	1	1	1	1	0	1	0	0	1
0	0	0	0	1	1	1	1	1	0	0	0	0
0	0	0	0	0	1	1	1	1	0	0	0	0
0	0	0	0	0	1	1	1	0	1	0	0	1
0	0	0	0	0	1	1	1	0	0	1	0	0
0	0	0	0	1	1	1	1	0	0	0	1	0
0	0	1	1	1	1	1	0	0	1	0	0	1
0	0	0	0	1	1	1	1	1	0	0	0	0
0	0	0	0	1	1	1	1	1	0	0	0	0
1	0	0	0	0	1	1	1	1	0	0	0	0
0	0	0	1	1	1	1	0	0	0	0	1	1
0	0	0	1	1	1	1	1	0	0	1	0	0
1	0	0	0	0	1	1	1	0	0	1	0	1
0	1	1	1	1	1	1	1	1	0	0	0	1
0	0	0	0	1	0	1	0	0	0	0	1	0
1	0	0	0	1	1	1	1	0	0	0	1	1
0	0	1	1	1	1	1	1	0	1	0	0	1
1	1	1	1	1	1	1	1	1	0	0	0	0
0	0	0	0	1	1	1	1	0	0	0	1	1
0	0	1	1	1	1	1	1	0	1	0	0	0
1	0	0	0	0	1	1	1	0	1	0	0	0
0	0	0	0	0	1	1	1	0	0	1	0	0
0	0	0	0	0	1	1	1	0	0	0	1	0
0	0	0	0	0	1	1	1	0	0	0	1	0
0	0	0	0	1	1	1	1	0	0	1	0	0
1	0	0	0	1	1	1	1	0	0	0	1	1
1	0	1	1	1	1	1	1	0	0	1	0	0
0	0	1	1	1	1	1	1	1	0	0	0	1
1	0	1	1	1	1	1	1	0	0	1	0	1
0	0	0	0	0	1	1	1	0	0	1	0	1
0	0	1	1	1	1	1	0	0	0	0	1	0
0	0	0	0	1	1	1	1	0	1	0	0	0
1	0	0	0	1	1	1	1	0	0	0	1	0
0	0	0	1	1	1	1	1	0	1	0	0	0
1	0	1	1	1	1	1	1	1	0	0	0	0
1	0	0	0	1	1	1	1	0	1	0	0	0
0	0	0	1	1	1	1	1	1	0	0	0	1
0	0	1	1	1	1	1	1	0	0	1	0	1
0	0	0	0	1	1	1	1	0	0	0	1	1
1	0	0	0	0	1	1	1	1	0	0	0	1
0	0	0	0	1	1	1	1	0	0	0	1	0
0	0	0	0	1	1	1	1	0	0	0	1	1
0	0	1	1	1	1	1	1	1	0	0	0	0
0	0	0	0	1	1	1	0	0	0	0	1	1
0	0	0	0	1	1	1	1	1	0	0	0	0
1	0	0	0	1	1	1	1	1	0	0	0	0
0	0	0	0	1	1	1	1	0	1	0	0	0
0	0	0	0	1	1	1	1	0	0	0	1	1
0	0	0	1	1	1	1	1	0	0	0	1	0
0	0	0	0	1	1	1	1	0	0	0	1	1
0	0	0	1	1	1	0	0	0	0	0	1	1
0	0	0	0	0	1	1	1	0	1	0	0	1
0	0	0	0	0	1	1	1	0	1	0	0	1
1	0	0	0	0	1	1	1	0	1	0	0	0
0	0	0	1	1	1	1	1	0	0	0	1	1
0	0	0	0	1	1	1	1	0	1	0	0	1
0	0	0	0	0	1	1	1	0	0	0	1	0
1	0	0	0	0	1	1	1	0	0	0	1	0
0	0	0	0	1	1	1	1	1	0	0	0	0
1	0	1	1	1	1	1	1	1	0	0	0	0
1	0	0	0	1	1	1	1	0	0	0	1	0
0	0	1	1	1	1	1	1	0	0	0	1	1
0	1	1	1	1	1	1	1	1	0	0	0	1
0	0	0	1	1	1	1	1	0	1	0	0	1
0	0	0	0	1	1	1	1	0	0	1	0	0
1	0	0	0	0	1	1	1	1	0	0	0	0
0	0	1	1	1	1	1	1	1	0	0	0	1
1	0	0	0	0	1	1	1	1	0	0	0	0
0	0	0	0	1	1	1	1	1	0	0	0	0
1	0	0	1	1	1	1	1	1	0	0	0	0
1	0	0	0	0	1	1	1	0	1	0	0	1
0	0	0	0	1	1	1	1	1	0	0	0	0
0	0	0	0	1	1	1	1	0	0	0	1	1
0	0	0	0	1	1	1	1	0	0	0	1	1
1	0	0	0	1	1	1	1	1	0	0	0	0
0	0	0	1	1	1	0	0	0	1	0	0	0
0	0	0	0	0	1	1	1	1	0	0	0	0
0	0	1	1	1	1	1	1	0	0	1	0	1
0	1	1	1	1	1	1	1	1	0	0	0	1
0	0	1	1	1	1	0	0	0	1	0	0	0
0	1	1	1	1	1	1	1	1	0	0	0	1
1	0	1	1	1	0	0	0	0	0	1	0	0
1	0	0	0	1	1	1	1	0	0	1	0	0
0	0	0	0	1	1	1	1	0	0	1	0	0
0	1	1	1	1	1	1	1	1	0	0	0	0
0	0	0	0	1	0	0	0	0	0	0	1	0
0	0	1	1	1	1	1	1	1	0	0	0	0
0	1	1	1	1	1	1	1	0	0	1	0	1
0	0	0	0	1	1	1	1	0	0	0	1	1
0	0	0	1	1	1	1	1	0	0	0	1	0
0	0	0	0	0	1	1	1	0	0	1	0	0
1	1	1	1	1	1	1	1	1	0	0	0	0
0	1	1	1	1	1	1	1	1	0	0	0	1
1	0	0	0	1	1	1	1	0	0	1	0	1
0	0	0	0	1	1	1	1	0	0	0	1	1
0	0	0	0	0	1	1	1	0	0	0	1	0
1	0	1	1	1	1	1	1	1	0	0	0	0
0	0	0	0	1	1	1	1	1	0	0	0	0
0	0	0	1	1	1	1	0	0	0	0	1	1
1	0	0	0	1	1	1	1	0	0	1	0	1
0	0	0	1	1	1	1	1	0	1	0	0	1
0	0	0	0	1	1	1	1	1	0	0	0	0
0	0	0	0	1	1	1	1	1	0	0	0	0
1	0	0	0	1	1	1	1	0	0	0	1	1
1	0	0	0	1	1	1	1	0	0	0	1	1
0	0	0	1	1	1	1	1	0	0	0	1	0
0	0	0	0	0	1	1	1	0	0	1	0	0
1	0	0	1	1	1	1	1	0	0	1	0	0
0	0	0	0	1	1	1	1	0	0	1	0	1
0	0	0	0	1	1	1	1	1	0	0	0	0
0	0	0	1	1	1	1	1	0	0	0	1	0
1	0	0	0	1	1	1	1	1	0	0	0	0
0	1	1	1	1	1	1	1	1	0	0	0	1
1	0	0	0	1	1	1	1	0	0	1	0	0
0	0	1	1	1	1	1	1	1	0	0	0	0
0	0	0	0	1	1	1	1	1	0	0	0	0
1	0	0	0	0	1	1	1	0	0	0	1	0
1	0	0	0	1	1	1	1	0	1	0	0	0
0	0	0	0	1	1	1	1	1	0	0	0	1
0	0	0	0	0	1	1	1	0	0	0	1	1
1	0	0	0	1	1	1	1	0	1	0	0	0
0	1	1	1	1	1	1	1	0	1	0	0	0
0	0	0	0	1	1	1	1	1	0	0	0	0
0	0	0	0	1	1	1	1	1	0	0	0	1
0	0	0	0	1	1	1	1	0	0	0	1	1
0	0	0	0	1	1	1	1	0	0	0	1	1
0	0	0	0	1	1	1	1	0	0	0	1	1
0	0	0	0	1	1	1	1	1	0	0	0	0
0	0	0	0	1	1	1	1	0	0	1	0	0
0	1	1	1	1	1	1	1	0	1	0	0	0
1	0	0	0	1	1	1	1	1	0	0	0	0
0	1	1	1	1	1	1	1	0	1	0	0	1
0	0	0	0	1	1	1	1	0	1	0	0	1
0	0	0	0	1	1	1	1	1	0	0	0	1
0	0	0	0	1	1	1	0	0	0	1	0	1
0	0	0	0	1	1	1	1	0	1	0	0	0
0	0	0	0	1	1	1	1	1	0	0	0	0
0	0	0	0	1	1	1	1	1	0	0	0	0
0	0	1	1	1	1	1	1	1	0	0	0	0
0	0	0	0	0	1	1	1	1	0	0	0	0
0	1	1	1	1	1	1	1	1	0	0	0	0
1	0	0	1	1	1	1	1	0	0	1	0	1
0	0	0	0	1	1	1	1	1	0	0	0	0
1	0	0	0	1	1	1	1	0	1	0	0	0
1	0	0	0	1	1	1	1	0	1	0	0	0
0	0	0	0	1	1	1	1	0	0	1	0	1
1	0	0	0	1	1	1	1	0	0	1	0	0
0	0	1	1	1	1	1	1	0	0	1	0	1
0	1	1	1	1	1	1	1	1	0	0	0	0
0	1	1	1	1	1	0	0	0	0	0	1	1
1	0	0	0	1	1	1	1	1	0	0	0	1
0	0	1	1	1	0	0	0	0	0	0	1	1
0	0	0	0	1	1	1	1	1	0	0	0	0
0	0	0	0	1	1	1	1	0	1	0	0	0
0	0	0	0	0	1	1	1	0	0	0	1	0
0	0	0	0	1	1	1	1	0	0	0	1	0
0	0	0	0	1	1	1	1	0	0	1	0	1
0	0	1	1	1	1	1	1	0	0	0	1	0
0	0	0	0	1	1	1	1	1	0	0	0	1
0	0	0	0	1	0	0	0	0	0	0	1	1
0	1	1	1	1	0	1	0	0	1	0	0	1
0	0	0	0	1	1	1	1	1	0	0	0	0
0	0	0	0	1	1	1	1	0	0	0	1	1
1	0	0	0	1	1	1	1	1	0	0	0	1
0	0	0	0	1	1	1	1	0	1	0	0	0
0	0	0	1	1	1	1	1	1	0	0	0	0
0	0	0	0	1	1	1	1	0	0	1	0	0
0	0	1	1	1	1	1	1	0	1	0	0	1
0	1	1	1	1	1	1	1	1	0	0	0	1
0	0	0	0	0	1	1	1	1	0	0	0	0
0	0	0	0	0	1	1	1	0	0	1	0	1
0	1	1	1	1	1	1	1	1	0	0	0	0
0	1	1	1	1	1	1	1	1	0	0	0	0
0	0	0	0	1	1	1	1	0	0	0	1	1
1	0	0	0	0	1	1	1	0	1	0	0	0
0	0	0	0	0	1	1	1	0	0	1	0	0
1	0	0	0	1	1	1	1	1	0	0	0	1
1	0	0	0	1	1	1	1	0	0	0	1	1
0	0	0	0	1	1	1	1	0	0	0	1	1
0	1	1	1	1	1	1	1	1	0	0	0	1
0	0	0	0	1	1	1	1	1	0	0	0	0
1	0	0	0	1	1	1	1	0	0	0	1	0
0	0	0	0	1	1	1	1	0	0	0	1	1
0	0	1	1	1	1	1	1	0	0	0	1	0
0	0	0	0	1	1	1	1	1	0	0	0	1
1	0	0	0	0	1	1	1	0	1	0	0	0
0	0	0	0	1	1	1	1	1	0	0	0	0
1	0	0	0	1	1	1	1	0	1	0	0	0
0	0	1	1	1	1	1	1	1	0	0	0	1
0	0	0	0	1	1	1	1	1	0	0	0	0
0	0	0	0	1	1	1	1	0	0	1	0	0
0	0	1	1	1	1	1	1	1	0	0	0	1
0	0	0	0	1	1	1	1	1	0	0	0	0
0	0	0	0	0	1	1	1	0	0	0	1	0
0	0	0	0	1	1	1	1	0	1	0	0	0
0	1	1	1	1	1	1	1	0	1	0	0	0
0	1	1	1	1	1	1	1	1	0	0	0	0
0	0	0	0	1	1	1	1	0	1	0	0	1
0	0	0	0	1	1	1	1	0	1	0	0	1
0	0	0	0	0	1	1	1	0	1	0	0	0
0	0	0	1	1	1	1	1	0	1	0	0	1
0	0	0	0	1	1	1	1	1	0	0	0	0
0	0	0	1	1	1	1	1	0	0	1	0	1
1	0	0	0	1	1	1	1	0	0	0	1	1
0	1	1	1	1	1	1	1	1	0	0	0	0
1	0	0	0	1	1	1	1	0	1	0	0	0
0	0	0	0	1	1	1	1	1	0	0	0	0
0	0	0	0	1	1	1	1	0	0	1	0	0
0	0	0	0	1	1	1	1	1	0	0	0	0
0	0	0	0	1	1	1	1	0	1	0	0	0
0	0	0	0	1	1	1	1	0	0	1	0	0
0	0	0	1	1	1	1	1	0	0	0	1	1
0	0	0	0	1	1	1	1	0	1	0	0	0
0	0	0	0	1	1	1	1	1	0	0	0	0
0	0	0	0	1	1	1	1	1	0	0	0	0
1	1	1	1	1	1	1	1	1	0	0	0	1
0	0	0	0	0	1	1	1	0	0	1	0	0
0	0	0	0	0	1	1	1	0	0	0	1	0
0	0	0	0	0	1	1	1	0	0	0	1	1
0	0	0	0	1	1	1	1	0	0	0	1	1
0	0	0	1	1	1	1	1	1	0	0	0	1
0	0	0	0	1	1	1	1	0	0	0	1	1
0	0	0	0	0	1	1	1	0	0	0	1	1
0	0	0	0	1	1	1	1	1	0	0	0	0
0	0	0	0	0	1	1	1	0	0	0	1	0
0	1	1	1	1	1	1	1	1	0	0	0	1
0	0	0	0	1	1	1	1	0	0	0	1	1
0	0	0	0	1	1	1	1	1	0	0	0	0
0	0	0	0	1	1	1	1	1	0	0	0	0
0	1	1	1	1	0	1	0	0	0	1	0	1
0	0	0	0	1	1	1	1	0	0	0	1	0
0	0	0	0	1	1	1	1	1	0	0	0	0
1	0	0	0	0	1	1	1	0	0	0	1	0
0	0	0	0	1	1	1	1	0	0	0	1	1
0	0	0	0	1	1	1	1	1	0	0	0	1
0	0	0	0	1	1	1	1	0	0	1	0	0
0	0	0	0	1	1	1	1	0	0	1	0	0
0	0	0	1	1	1	1	1	1	0	0	0	1
0	0	0	0	1	0	0	0	0	0	0	1	1
0	0	0	1	1	1	1	1	1	0	0	0	0
0	0	0	0	1	1	1	1	0	0	0	1	0
0	0	0	0	1	1	1	1	0	0	1	0	0
1	0	0	0	0	1	1	1	0	0	0	1	0
0	0	0	0	1	1	1	1	1	0	0	0	0
1	0	1	1	1	1	1	0	0	1	0	0	0
0	0	0	1	1	1	1	1	0	0	0	1	1
0	1	1	1	1	0	1	0	0	0	1	0	1
0	0	0	0	1	1	1	1	1	0	0	0	1
0	0	0	0	1	1	1	1	0	0	1	0	0
0	0	1	1	1	1	1	1	1	0	0	0	0
0	0	0	1	1	1	1	1	1	0	0	0	0
0	0	1	1	1	1	1	1	0	0	0	1	0
0	0	0	0	1	1	1	1	0	0	0	1	0
0	0	0	1	1	1	0	0	0	0	0	1	1
0	1	1	1	1	1	1	0	1	0	0	0	1
0	0	0	0	1	1	1	1	1	0	0	0	0
0	0	0	0	1	1	1	1	0	0	1	0	1
0	0	0	0	1	1	1	1	0	1	0	0	1
0	0	0	0	0	1	1	1	0	1	0	0	0
0	1	1	1	1	1	1	0	0	1	0	0	0
0	0	0	0	0	1	1	1	0	0	0	1	1
0	0	0	0	1	1	1	1	0	0	1	0	0
0	0	0	0	1	1	1	1	0	0	0	1	0
0	1	1	1	1	1	1	1	1	0	0	0	0
0	0	0	0	1	1	1	1	0	0	1	0	0
0	0	0	0	1	1	1	1	0	0	0	1	1
1	0	0	0	0	1	1	1	0	1	0	0	0
0	0	0	0	0	1	1	1	1	0	0	0	0
1	0	1	1	1	1	1	1	1	0	0	0	0
0	0	0	0	1	1	1	1	0	0	0	1	1
0	0	0	0	1	1	1	1	0	1	0	0	0
0	0	0	0	1	1	1	1	0	0	0	1	1
0	0	0	0	1	1	1	1	0	0	1	0	0
0	1	1	1	1	0	1	0	0	0	1	0	1
0	0	1	1	1	1	1	1	0	1	0	0	1
0	0	0	0	1	1	1	1	1	0	0	0	0
1	0	1	1	1	1	1	1	1	0	0	0	0
0	0	0	0	0	1	1	1	0	0	0	1	0
1	0	0	0	1	1	1	1	1	0	0	0	0
0	0	0	0	1	1	1	1	0	1	0	0	0
0	0	0	0	0	1	1	1	1	0	0	0	0
0	0	0	0	0	1	1	1	0	0	0	1	1
1	0	0	0	0	1	1	1	1	0	0	0	0
1	0	0	0	1	1	1	1	0	1	0	0	0
0	0	0	0	1	1	1	1	1	0	0	0	0
0	0	0	0	1	1	1	1	0	0	0	1	1
0	0	0	0	1	1	1	0	0	0	1	0	1
0	0	0	0	0	1	1	1	0	0	0	1	0
0	0	0	0	0	1	1	1	0	1	0	0	0
0	0	1	1	1	1	1	1	1	0	0	0	1
0	1	1	1	1	1	1	1	1	0	0	0	0
0	0	0	1	1	1	1	1	1	0	0	0	0
0	1	1	1	1	1	0	0	0	0	1	0	0
0	0	0	0	1	1	1	1	1	0	0	0	0
0	1	1	1	1	1	0	0	0	0	1	0	1
0	0	0	0	1	1	1	1	1	0	0	0	0
0	0	0	0	1	1	1	1	0	0	1	0	0
1	0	0	0	1	1	1	0	0	0	0	1	0
0	0	0	1	1	1	1	1	0	1	0	0	1
0	0	0	0	1	1	1	1	0	0	0	1	0
0	0	1	1	1	1	1	1	0	0	0	1	1
0	0	0	0	1	1	1	1	0	0	0	1	1
0	0	0	1	1	1	1	1	0	0	1	0	1
0	1	1	1	1	1	1	0	1	0	0	0	0
0	0	0	0	0	1	1	1	0	0	1	0	1
0	0	0	0	1	1	1	1	1	0	0	0	0
0	0	0	0	0	1	1	1	0	0	0	1	1
0	1	1	1	1	1	1	1	0	0	0	1	1
0	0	1	1	1	0	1	0	0	1	0	0	0
0	0	0	0	1	1	0	0	0	0	0	1	1
1	0	0	0	0	1	1	1	0	1	0	0	0
0	0	0	0	1	1	1	1	1	0	0	0	1
1	0	0	0	1	1	1	1	1	0	0	0	1
0	1	1	1	1	0	1	0	0	1	0	0	1
0	0	0	0	1	1	1	1	1	0	0	0	0
1	0	0	0	1	1	1	1	0	0	0	1	1
0	0	0	0	1	1	1	1	1	0	0	0	1
0	0	0	0	1	1	1	1	0	0	1	0	1
0	0	1	1	1	1	1	1	0	0	1	0	1
1	0	0	0	1	1	1	1	0	0	1	0	0
0	0	1	1	1	1	1	1	0	0	1	0	1
0	1	1	1	1	1	1	1	1	0	0	0	0
0	0	0	0	0	1	1	1	0	0	0	1	0
0	0	0	0	1	1	1	1	0	1	0	0	1
1	1	1	1	1	1	1	1	0	1	0	0	1
0	0	0	0	0	1	1	1	0	0	1	0	0
0	0	0	0	1	1	1	1	1	0	0	0	0
1	0	0	0	1	1	1	1	1	0	0	0	0
0	0	0	0	1	1	1	0	1	0	0	0	0
0	0	0	0	0	1	1	1	1	0	0	0	1
1	0	0	0	1	1	1	1	0	0	0	1	1
0	0	0	0	1	1	1	1	1	0	0	0	0
0	0	0	0	1	1	1	1	0	1	0	0	0
0	1	1	1	1	1	1	1	0	1	0	0	0
0	1	1	1	1	1	1	1	0	1	0	0	0
0	0	0	0	1	1	1	1	0	1	0	0	1
0	0	0	0	1	1	1	1	0	0	1	0	1
0	0	0	0	0	1	1	1	0	0	0	1	0
0	0	0	0	1	1	1	1	0	1	0	0	1
0	0	0	0	1	0	1	0	0	0	0	1	1
1	0	0	1	1	1	1	1	0	1	0	0	1
0	0	0	0	1	1	1	1	1	0	0	0	0
0	0	1	1	1	0	1	0	0	0	0	1	1
0	0	0	0	1	1	1	1	0	1	0	0	1
0	1	1	1	1	1	1	1	1	0	0	0	1
1	0	0	0	1	1	1	1	0	0	0	1	1
1	0	0	0	1	1	1	1	0	0	1	0	0
0	0	0	1	1	1	1	1	0	0	0	1	1
0	0	0	0	0	1	1	1	0	0	0	1	0
0	0	0	1	1	0	1	0	0	0	0	1	1
0	0	0	0	0	1	1	1	0	1	0	0	0
1	0	0	0	0	1	1	1	0	0	1	0	0
1	0	1	1	1	1	1	1	1	0	0	0	0
0	0	0	0	1	1	1	1	0	0	1	0	0
0	0	0	0	0	1	1	1	0	0	0	1	1
0	0	0	0	1	1	1	1	0	0	1	0	1
0	0	0	0	1	1	1	0	0	0	1	0	1
0	0	0	1	1	1	1	1	0	0	0	1	1
1	0	0	0	1	1	1	1	0	0	1	0	1
0	0	1	1	1	1	1	1	0	0	1	0	1
0	0	0	0	1	1	1	1	0	0	1	0	0
0	0	0	0	1	1	1	1	0	0	1	0	0
1	0	0	1	1	1	1	1	0	1	0	0	0
0	0	0	0	0	1	1	1	0	0	0	1	1
0	0	0	0	0	1	1	1	0	0	1	0	1
0	0	0	0	0	1	1	1	0	0	1	0	0
0	0	0	0	0	1	1	1	0	0	1	0	0
1	1	1	1	1	1	1	1	0	1	0	0	0
0	0	0	0	1	0	1	0	0	0	1	0	1
0	1	1	1	1	1	0	0	0	0	1	0	1
0	0	1	1	1	1	0	0	0	0	0	1	1
0	0	1	1	1	1	1	1	0	0	1	0	1
0	0	0	0	0	1	1	1	0	0	1	0	0
0	0	0	0	1	1	1	1	0	0	0	1	0
0	0	0	0	1	1	1	1	0	0	0	1	1
0	0	1	1	1	1	1	0	0	0	0	1	0
1	0	0	0	1	1	1	1	0	0	0	1	0
0	0	0	1	1	1	1	1	0	0	0	1	1
1	0	0	0	0	1	1	1	0	1	0	0	0
0	1	1	1	1	1	1	1	0	1	0	0	0
0	0	0	0	1	0	1	0	0	0	0	1	1
1	0	1	1	1	1	1	1	0	1	0	0	0
0	0	0	0	1	0	1	0	0	0	0	1	1
0	0	0	0	1	1	1	1	0	1	0	0	0
0	0	0	0	0	1	1	1	1	0	0	0	0
1	1	1	1	1	1	1	1	1	0	0	0	1
0	0	0	0	1	1	1	1	0	0	0	1	0
1	0	0	0	0	1	1	1	0	1	0	0	0
0	0	1	1	1	1	1	1	1	0	0	0	1
0	0	0	0	1	1	1	1	0	0	1	0	0
1	0	0	1	1	1	1	1	0	0	0	1	0
0	0	0	0	1	1	1	0	0	0	0	1	1
0	0	0	0	0	1	1	1	0	0	0	1	1
0	0	0	0	1	1	1	1	0	0	0	1	0
0	0	0	1	1	1	1	0	0	0	0	1	1
0	0	0	0	0	1	1	1	1	0	0	0	1
0	0	0	0	1	1	1	1	0	0	1	0	0
0	1	1	1	1	0	1	0	0	0	0	1	1
0	0	0	1	1	1	1	1	1	0	0	0	1
0	0	0	1	1	1	1	1	0	0	0	1	1
0	0	0	0	1	1	1	1	1	0	0	0	0
0	0	0	0	1	1	1	1	0	0	0	1	0
0	0	0	1	1	1	1	1	0	0	1	0	0
0	0	0	0	1	0	1	0	0	0	0	1	1
1	1	1	1	1	1	0	0	0	0	1	0	1
0	0	0	0	1	1	1	1	0	1	0	0	1
0	0	0	0	0	1	1	1	0	1	0	0	0
0	0	0	0	1	1	1	1	1	0	0	0	0
0	0	0	0	1	1	1	1	1	0	0	0	0
0	0	1	1	1	1	1	1	1	0	0	0	0
0	1	1	1	1	1	1	1	0	0	0	1	1
0	0	0	1	1	1	1	1	0	0	0	1	1
0	0	0	0	0	1	1	1	0	0	0	1	1
1	0	0	0	1	1	1	1	1	0	0	0	0
0	0	0	0	0	1	1	1	0	1	0	0	0
0	0	0	0	0	1	1	1	0	0	0	1	0
1	0	1	1	1	1	1	1	1	0	0	0	1
0	0	0	0	1	1	1	1	0	0	1	0	0
0	0	0	0	1	1	1	1	0	0	1	0	1
0	0	0	0	0	1	1	1	0	0	1	0	0
0	0	0	0	0	1	1	1	1	0	0	0	0
0	0	0	0	1	1	1	1	0	0	0	1	1
0	0	1	1	1	1	1	1	1	0	0	0	1
1	0	1	1	1	1	1	0	1	0	0	0	1
0	0	0	0	1	1	1	1	0	0	0	1	1
0	0	0	0	1	1	1	1	0	0	0	1	0
0	0	1	1	1	1	1	1	1	0	0	0	1
0	0	0	0	1	1	1	1	0	0	0	1	0
0	0	0	0	1	0	1	0	0	0	0	1	1
0	0	1	1	1	1	1	1	1	0	0	0	0
0	0	0	1	1	1	0	0	0	0	0	1	1
0	0	0	0	0	1	1	1	1	0	0	0	0
0	0	0	0	1	1	1	1	0	1	0	0	1
0	0	0	0	1	1	1	1	0	0	0	1	1
0	1	1	1	1	0	1	0	0	0	1	0	1
0	0	0	0	0	1	1	1	1	0	0	0	0
1	0	0	0	1	1	1	1	0	0	0	1	0
0	0	0	0	0	1	1	1	0	0	1	0	0
1	0	1	1	1	1	1	1	0	0	1	0	1
0	0	0	0	1	1	1	1	0	0	1	0	0
0	0	0	0	1	1	1	1	0	0	0	1	1
0	0	0	0	1	1	1	1	1	0	0	0	0
0	0	0	0	0	1	1	1	1	0	0	0	0
0	0	1	1	1	1	1	1	1	0	0	0	1
0	1	1	1	1	1	1	1	1	0	0	0	1
0	0	0	0	0	1	1	1	0	0	0	1	1
0	1	1	1	1	1	1	1	0	0	1	0	0
1	0	0	0	0	1	1	1	0	0	1	0	1
0	0	0	0	1	1	1	1	0	0	0	1	0
0	0	0	0	0	1	1	1	0	1	0	0	0
0	0	0	1	1	1	1	1	1	0	0	0	0
1	0	0	0	1	1	1	1	0	0	1	0	1
1	0	0	0	1	1	1	1	1	0	0	0	0
0	0	0	0	1	1	1	1	0	0	1	0	0
0	0	0	0	1	1	1	1	1	0	0	0	0
0	1	1	1	1	1	1	1	1	0	0	0	0
0	0	0	1	1	1	0	0	0	0	0	1	1
1	0	0	0	1	1	1	1	0	0	1	0	0
0	0	0	0	0	1	1	1	0	1	0	0	1
0	0	0	0	0	1	1	1	0	0	0	1	1
0	0	0	0	1	1	1	1	1	0	0	0	0
1	1	1	1	1	1	1	0	0	0	1	0	1
0	0	0	0	1	1	1	1	1	0	0	0	1
0	1	1	1	1	1	1	1	1	0	0	0	1
0	0	0	1	1	1	1	1	1	0	0	0	0
0	0	0	0	1	1	1	1	0	0	1	0	0
0	0	0	0	1	0	1	0	0	0	0	1	1
0	0	0	0	1	1	1	0	0	0	0	1	1
0	0	1	1	1	1	1	1	1	0	0	0	0
0	0	0	0	1	1	1	1	0	0	1	0	1
1	0	0	0	0	1	1	1	1	0	0	0	0
1	0	0	0	0	1	1	1	0	1	0	0	0
0	0	0	0	1	1	1	1	0	0	1	0	1
0	0	0	0	1	1	0	0	0	0	0	1	0
0	0	0	0	1	1	1	1	0	0	1	0	0
0	0	0	0	1	1	1	0	0	0	0	1	1
0	0	0	0	1	0	1	0	0	0	0	1	0
1	0	1	1	1	1	1	1	1	0	0	0	0
1	0	0	0	0	1	1	1	0	1	0	0	0
0	1	1	1	1	1	1	1	1	0	0	0	1
1	0	0	0	1	1	1	1	0	1	0	0	0
1	0	0	0	1	1	1	1	0	0	1	0	0
1	0	0	0	1	1	0	0	0	0	0	1	0
0	0	0	1	1	1	0	0	0	0	0	1	0
0	0	0	0	0	1	1	1	0	1	0	0	0
1	0	0	0	1	1	1	1	0	1	0	0	1
0	0	0	0	1	1	1	1	1	0	0	0	0
0	0	0	0	1	1	1	1	1	0	0	0	1
0	0	0	1	1	1	1	1	0	1	0	0	0
0	0	0	0	1	1	1	1	0	0	0	1	1
0	0	0	0	0	1	1	1	0	0	0	1	1
0	0	0	0	1	1	1	1	0	0	0	1	1
0	0	0	0	1	1	1	1	0	1	0	0	0
0	0	0	0	0	1	1	1	0	0	0	1	1
1	1	1	1	1	1	1	1	1	0	0	0	0
0	0	0	0	1	1	1	1	1	0	0	0	0
0	0	0	0	0	1	1	1	1	0	0	0	0
0	0	0	1	1	1	1	1	1	0	0	0	0
0	0	1	1	1	1	0	0	0	0	0	1	1
0	0	0	0	1	1	1	1	0	0	1	0	0
0	0	0	0	1	1	1	1	0	0	1	0	0
0	0	0	0	1	1	1	1	0	0	0	1	1
0	0	1	1	1	1	1	1	1	0	0	0	1
0	1	1	1	1	1	1	1	1	0	0	0	1
0	0	0	0	0	1	1	1	1	0	0	0	0
1	0	0	0	0	1	1	1	0	0	0	1	1
0	0	0	0	1	1	1	1	0	1	0	0	0
0	0	0	0	1	1	1	1	0	0	0	1	0
0	0	0	0	1	1	1	1	1	0	0	0	0
0	0	0	0	1	1	1	1	1	0	0	0	0
0	0	0	0	0	1	1	1	0	0	1	0	1
0	0	0	0	0	1	1	1	0	0	0	1	0
0	0	0	0	1	1	1	1	0	0	1	0	0
0	0	0	0	1	1	1	1	0	0	0	1	0
0	0	0	0	1	1	1	0	0	0	0	1	0
0	0	0	0	1	1	1	1	0	0	0	1	1
0	0	0	0	0	1	1	1	0	1	0	0	0
0	0	0	1	1	1	0	0	0	0	0	1	1
0	0	0	0	1	0	1	0	0	0	0	1	1
0	0	0	1	1	1	1	1	1	0	0	0	0
0	0	0	0	1	1	1	1	0	0	0	1	1
0	0	0	0	1	1	1	1	0	1	0	0	0
0	0	0	0	1	1	1	1	1	0	0	0	0
0	0	0	0	0	1	1	1	1	0	0	0	0
1	0	0	0	1	1	1	1	0	0	1	0	0
1	0	0	0	1	1	1	1	0	0	0	1	0
0	0	0	0	1	1	1	1	0	1	0	0	1
1	0	0	0	1	1	1	1	1	0	0	0	1
0	1	1	1	1	1	1	1	1	0	0	0	0
0	0	0	0	1	1	1	1	0	0	0	1	1
1	0	0	0	1	1	1	1	0	0	0	1	1
1	0	1	1	1	1	1	1	0	0	1	0	1
0	1	1	1	1	1	1	1	1	0	0	0	0
0	0	0	0	0	1	1	1	0	0	1	0	0
0	0	0	0	0	1	1	1	0	0	1	0	0
0	0	0	0	0	1	1	1	0	0	1	0	1
0	1	1	1	1	1	1	1	1	0	0	0	0
0	0	0	0	1	1	1	1	1	0	0	0	0
1	0	0	0	1	1	1	1	0	0	0	1	1
0	0	1	1	1	1	1	0	1	0	0	0	1
0	0	0	0	1	1	1	1	0	0	0	1	0
0	1	1	1	1	1	1	1	0	1	0	0	1
0	0	0	0	1	1	1	0	0	0	1	0	0
0	0	0	0	1	1	0	0	0	0	0	1	1
0	1	1	1	1	1	1	0	0	0	0	1	1
0	0	0	0	1	1	0	0	0	0	0	1	1
0	0	0	0	1	0	0	0	0	0	0	1	0
0	0	1	1	1	1	1	1	0	1	0	0	0
0	0	0	0	1	1	1	1	0	0	0	1	0
0	0	0	0	1	0	0	0	0	0	0	1	1
0	0	0	0	1	1	1	1	0	0	0	1	1
1	0	1	1	1	1	1	1	0	1	0	0	0
0	0	0	0	0	1	1	1	0	0	0	1	0
0	1	1	1	1	1	1	1	1	0	0	0	0
0	0	0	0	1	1	1	1	1	0	0	0	0
0	0	0	0	0	1	1	1	1	0	0	0	0
0	0	0	0	1	1	1	1	0	0	0	1	1
0	0	0	1	1	1	1	1	1	0	0	0	1
0	1	1	1	1	1	1	0	1	0	0	0	1
0	0	0	1	1	1	0	0	0	0	0	1	0
0	1	1	1	1	1	1	1	1	0	0	0	1
0	0	0	0	0	1	1	1	0	1	0	0	1
0	0	0	0	0	1	1	1	0	0	0	1	0
1	0	0	1	1	1	1	1	1	0	0	0	0
0	0	0	0	0	1	1	1	0	1	0	0	0
1	0	0	1	1	1	1	1	0	0	0	1	1
0	1	1	1	1	1	1	1	1	0	0	0	0
0	0	0	0	1	1	1	1	0	1	0	0	0
0	0	0	0	1	1	1	1	0	0	0	1	1
0	0	0	0	1	0	0	0	0	0	0	1	0
0	0	0	0	1	1	1	1	0	0	0	1	1
0	0	0	0	0	1	1	1	1	0	0	0	0
0	0	0	0	1	1	1	1	0	1	0	0	1
0	0	0	0	0	1	1	1	0	1	0	0	0
1	0	0	0	0	1	1	1	0	0	0	1	0
0	0	1	1	1	1	1	1	1	0	0	0	0
0	0	0	0	1	1	1	1	0	0	0	1	0
0	1	1	1	1	1	1	1	1	0	0	0	1
1	0	0	0	1	1	1	1	0	0	1	0	1
0	0	0	1	1	1	1	0	0	0	0	1	0
0	0	0	0	1	1	1	1	0	0	1	0	1
0	0	0	1	1	1	1	0	0	0	1	0	0
0	0	0	0	1	1	1	1	0	1	0	0	0
0	0	0	0	0	1	1	1	0	0	0	1	1
0	0	0	1	1	1	1	1	1	0	0	0	0
0	0	1	1	1	1	0	0	0	0	0	1	1
1	0	0	0	1	1	1	1	0	0	1	0	1
1	0	0	0	1	1	1	1	0	0	0	1	1
0	0	1	1	1	1	1	0	0	0	1	0	0
1	0	0	0	1	1	1	1	0	1	0	0	1
0	1	1	1	1	1	0	0	0	1	0	0	1
0	0	0	0	0	1	1	1	0	0	0	1	1
1	0	0	0	1	1	1	1	1	0	0	0	0
0	0	0	0	0	1	1	1	0	1	0	0	0
0	0	0	1	1	1	1	1	0	0	0	1	1
0	0	0	0	1	1	1	1	0	0	0	1	0
1	0	0	0	1	1	1	1	0	0	0	1	0
0	0	1	1	1	1	1	1	0	0	1	0	0
0	0	0	0	1	1	1	1	0	1	0	0	0
0	0	0	0	1	1	1	1	0	0	1	0	0
1	0	0	0	1	1	1	1	0	0	0	1	0
0	0	1	1	1	1	1	1	0	0	1	0	1
0	0	0	0	1	1	1	1	1	0	0	0	1
1	0	0	1	1	1	1	1	0	0	1	0	0
0	0	0	0	0	1	1	1	0	1	0	0	0
1	0	0	0	0	1	1	1	1	0	0	0	0
0	0	0	0	1	1	1	1	0	0	0	1	0
0	0	0	0	1	1	1	1	0	0	0	1	1
0	0	0	0	1	1	1	1	0	1	0	0	0
0	0	0	1	1	1	1	1	0	0	0	1	0
1	0	0	0	0	1	1	1	1	0	0	0	0
0	0	0	1	1	1	1	1	1	0	0	0	1
0	0	0	1	1	1	1	0	0	0	0	1	0
0	0	0	0	0	1	1	1	0	1	0	0	0
1	0	0	0	1	1	1	1	0	1	0	0	0
0	0	0	0	1	1	1	1	1	0	0	0	0
0	0	0	0	1	1	1	1	0	0	0	1	0
0	0	0	0	0	1	1	1	1	0	0	0	0
0	1	1	1	1	1	1	1	0	0	1	0	0
0	0	0	0	1	1	1	1	0	0	0	1	1
0	0	0	1	1	1	1	1	0	0	1	0	0
0	0	0	1	1	1	1	0	0	0	0	1	1
0	0	0	0	1	1	1	1	0	1	0	0	1
0	0	0	0	1	1	1	1	0	0	0	1	0
0	0	0	0	0	1	1	1	1	0	0	0	1
0	0	0	0	0	1	1	1	0	0	1	0	0
0	0	0	0	1	1	0	0	0	0	0	1	0
0	0	0	0	0	1	1	1	0	0	0	1	0
0	0	0	0	1	1	1	1	0	0	0	1	1
0	0	0	1	1	1	1	1	0	0	0	1	1
0	0	0	0	1	1	1	1	0	0	0	1	1
0	0	1	1	1	1	1	0	1	0	0	0	0
0	0	0	0	1	1	1	1	1	0	0	0	0
0	0	0	0	1	1	1	1	1	0	0	0	0
0	1	1	1	1	0	1	0	0	1	0	0	0
0	0	0	0	1	1	1	1	1	0	0	0	0
0	0	0	0	1	1	1	1	0	1	0	0	1
1	0	0	0	1	1	1	1	0	0	0	1	0
0	0	0	0	0	1	1	1	0	1	0	0	0
1	0	0	0	1	1	1	1	1	0	0	0	0
0	0	0	0	0	1	1	1	0	0	0	1	0
0	0	0	1	1	1	1	1	0	0	0	1	0
0	0	0	1	1	1	1	1	0	0	1	0	0
0	1	1	1	1	1	1	1	1	0	0	0	0
0	0	0	0	0	1	1	1	0	1	0	0	0
0	0	0	0	1	1	1	1	0	0	1	0	0
1	0	0	0	1	1	1	1	0	0	0	1	1
0	0	0	1	1	1	1	1	0	0	1	0	0
0	0	0	1	1	1	1	1	1	0	0	0	1
1	0	0	0	1	1	1	1	0	0	0	1	1
0	0	1	1	1	1	1	1	1	0	0	0	0
1	0	0	0	1	1	0	0	0	0	1	0	0
0	0	0	0	1	1	0	0	0	0	0	1	1
0	0	0	0	1	0	1	0	0	0	0	1	1
0	0	1	1	1	1	0	0	0	1	0	0	0
0	0	0	0	1	1	1	1	0	0	1	0	1
0	1	1	1	1	1	1	1	0	0	1	0	0
0	1	1	1	1	1	1	1	1	0	0	0	0
1	0	0	0	1	1	1	1	1	0	0	0	0
0	0	0	0	1	1	1	1	1	0	0	0	0
0	0	0	0	1	1	1	1	0	1	0	0	0
0	0	0	1	1	1	1	1	0	1	0	0	0
0	0	0	0	1	1	1	1	1	0	0	0	0
1	1	1	1	1	1	1	1	1	0	0	0	0
1	0	0	1	1	1	1	1	0	1	0	0	0
0	0	0	0	0	1	1	1	1	0	0	0	0
0	0	0	0	1	1	1	0	0	0	1	0	1
1	0	0	0	1	1	1	1	0	0	1	0	0
1	0	0	0	0	1	1	1	0	0	0	1	1
0	0	0	0	0	1	1	1	1	0	0	0	0
0	0	0	0	1	1	1	1	0	0	1	0	1
0	0	0	0	1	1	1	1	0	0	1	0	0
0	0	0	0	0	1	1	1	0	0	0	1	0
1	0	0	0	0	1	1	1	1	0	0	0	1
0	0	1	1	1	1	1	1	1	0	0	0	0
0	0	0	0	0	1	1	1	0	0	1	0	0
0	0	0	0	1	1	1	1	1	0	0	0	1
1	0	0	0	1	1	1	1	0	1	0	0	0
0	0	0	0	1	1	1	1	0	0	0	1	0
0	0	0	0	1	1	1	0	0	0	0	1	0
0	0	0	0	1	1	1	1	1	0	0	0	1
0	0	0	0	1	1	1	1	0	0	0	1	0
0	0	0	0	1	1	1	1	0	1	0	0	0
0	0	0	0	1	1	1	1	0	0	0	1	1
1	0	0	0	1	1	1	1	1	0	0	0	1
0	0	1	1	1	1	1	1	0	1	0	0	1
0	0	0	0	1	1	1	1	0	1	0	0	0
0	0	0	1	1	0	1	0	0	0	0	1	1
0	0	0	0	1	1	0	0	0	0	0	1	0
0	0	0	1	1	1	1	1	0	0	0	1	1
0	0	0	0	0	1	1	1	0	0	0	1	1
0	0	0	1	1	1	1	1	1	0	0	0	0
0	1	1	1	1	1	1	1	0	0	1	0	1
0	0	0	0	1	1	1	1	1	0	0	0	0
0	0	0	0	1	1	1	1	0	0	0	1	1
0	0	0	0	1	1	0	0	0	0	0	1	1
0	0	0	0	1	1	1	1	0	0	0	1	1
0	0	0	1	1	1	1	1	0	0	0	1	1
0	0	0	0	1	1	1	1	1	0	0	0	0
0	0	0	0	1	1	1	1	0	0	0	1	1
1	0	0	1	1	1	1	1	0	0	1	0	1
0	0	0	0	1	1	1	1	1	0	0	0	0
0	0	0	0	0	1	1	1	0	1	0	0	1
0	0	1	1	1	1	1	1	0	0	1	0	1
0	0	0	0	1	1	1	1	1	0	0	0	0
0	0	0	0	1	1	1	1	0	0	0	1	0
0	0	0	0	1	1	1	1	0	0	0	1	0
1	0	0	0	1	1	1	1	0	0	1	0	0
0	0	0	0	0	1	1	1	1	0	0	0	0
0	0	0	0	1	1	1	1	0	0	0	1	1
1	0	0	0	1	1	1	1	1	0	0	0	0
0	0	0	1	1	1	1	1	1	0	0	0	0
0	0	0	0	1	1	1	0	0	0	0	1	0
0	0	0	0	1	1	1	1	0	0	1	0	0
0	1	1	1	1	1	1	1	0	0	1	0	1
0	0	0	0	1	1	1	1	0	0	1	0	0
1	0	0	1	1	1	1	1	1	0	0	0	0
0	0	0	0	1	1	1	1	0	0	0	1	1
0	0	0	0	0	1	1	1	0	0	1	0	1
1	1	1	1	1	1	1	1	1	0	0	0	0
0	0	0	0	1	1	1	1	0	0	1	0	0
0	0	1	1	1	1	1	1	0	0	1	0	1
1	0	0	0	0	1	1	1	0	0	0	1	1
0	0	0	0	1	1	1	1	0	0	0	1	1
0	0	0	0	1	1	1	1	0	0	0	1	0
0	0	0	1	1	1	1	1	0	1	0	0	0
0	0	0	0	0	1	1	1	1	0	0	0	0
0	0	0	0	1	0	1	0	0	0	0	1	1
0	0	0	0	1	1	1	1	0	1	0	0	0
1	0	0	0	1	1	1	1	1	0	0	0	1
0	0	0	0	0	1	1	1	1	0	0	0	0
0	0	1	1	1	1	1	1	1	0	0	0	1
0	0	0	0	1	1	1	1	1	0	0	0	0
0	0	0	0	1	1	1	1	0	0	0	1	0
0	0	0	0	1	0	0	0	0	0	0	1	0
0	0	0	0	1	1	0	0	0	0	0	1	1
0	0	0	0	1	1	1	1	1	0	0	0	1
0	0	1	1	1	1	1	1	1	0	0	0	0
0	0	0	0	1	1	1	1	1	0	0	0	0
0	0	0	0	1	1	1	1	0	0	0	1	1
0	0	0	0	0	1	1	1	0	0	0	1	0
0	0	1	1	1	1	1	1	0	0	0	1	1
0	0	0	0	1	1	1	1	0	1	0	0	0
0	0	1	1	1	1	1	1	1	0	0	0	0
0	0	0	1	1	0	0	0	0	0	0	1	1
0	0	0	0	1	1	1	1	0	0	0	1	1
0	0	0	0	1	1	1	1	0	1	0	0	0
0	0	1	1	1	1	1	1	1	0	0	0	1
0	0	0	0	0	1	1	1	1	0	0	0	0
1	0	0	0	1	1	1	0	0	0	1	0	0
0	0	0	0	0	1	1	1	0	0	0	1	1
0	0	1	1	1	1	1	1	0	1	0	0	1
1	0	1	1	1	1	1	1	1	0	0	0	1
0	0	0	1	1	1	1	0	0	1	0	0	0
0	0	0	0	0	1	1	1	0	0	0	1	0
0	0	0	0	1	1	1	1	0	1	0	0	0
0	0	0	0	1	1	1	1	0	0	0	1	1
0	0	0	0	0	1	1	1	0	1	0	0	1
1	0	0	0	0	1	1	1	0	0	1	0	0
0	0	1	1	1	1	0	0	0	0	1	0	0
0	1	1	1	1	1	1	1	1	0	0	0	1
0	0	0	0	1	1	1	1	1	0	0	0	0
0	1	1	1	1	1	1	1	0	0	1	0	1
0	0	0	0	1	1	1	1	0	0	0	1	1
0	0	0	0	1	1	1	1	0	1	0	0	1
0	0	1	1	1	1	1	1	1	0	0	0	1
0	0	0	0	1	1	1	1	0	0	0	1	0
0	0	0	1	1	1	1	1	1	0	0	0	0
0	0	0	0	1	1	1	1	0	0	0	1	1
1	0	0	1	1	1	1	1	0	1	0	0	1
0	0	0	1	1	1	1	1	0	0	0	1	0
0	0	0	1	1	1	1	0	0	0	1	0	0
0	0	0	0	1	1	1	1	0	0	0	1	1
0	0	0	0	1	1	1	1	1	0	0	0	0
0	0	0	1	1	1	1	1	0	1	0	0	1
0	0	1	1	1	1	0	0	0	0	1	0	1
0	0	0	0	1	1	1	1	0	0	0	1	1
0	1	1	1	1	1	1	1	0	0	1	0	1
0	0	0	1	1	1	1	1	1	0	0	0	0
0	0	0	0	1	1	1	1	1	0	0	0	0
0	0	1	1	1	1	1	1	0	0	1	0	1
0	1	1	1	1	1	1	0	1	0	0	0	1
0	0	0	0	1	0	1	0	0	0	0	1	1
0	0	0	0	1	1	1	1	0	0	1	0	1
0	0	0	0	1	1	1	1	0	0	0	1	1
1	0	1	1	1	1	1	1	0	0	0	1	1
0	0	0	0	1	1	1	1	1	0	0	0	0
0	0	0	0	0	1	1	1	0	0	0	1	0
0	0	0	0	1	1	1	1	0	0	0	1	1
0	0	0	0	1	1	1	1	0	0	0	1	1
0	0	0	0	1	1	0	0	0	0	0	1	1
0	0	0	0	1	1	1	1	0	0	0	1	1
0	0	0	1	1	1	1	1	1	0	0	0	0
1	0	0	0	0	1	1	1	0	0	0	1	1
0	1	1	1	1	1	1	1	0	1	0	0	1
0	0	0	0	0	1	1	1	0	1	0	0	0
0	0	0	1	1	1	1	1	0	0	0	1	0
0	0	0	0	1	1	1	1	0	0	0	1	1
0	0	0	0	1	1	1	1	0	1	0	0	1
1	0	0	0	1	1	1	1	1	0	0	0	0
0	0	0	0	1	1	0	0	0	0	0	1	1
0	0	1	1	1	1	1	1	0	0	1	0	0
0	0	0	1	1	1	1	1	0	0	0	1	1
0	0	0	0	1	1	1	1	1	0	0	0	0
0	0	0	0	1	1	1	0	0	0	1	0	1
0	0	1	1	1	1	1	1	0	0	1	0	1
0	0	1	1	1	1	1	1	1	0	0	0	0
0	0	0	0	1	1	1	1	1	0	0	0	0
0	0	0	0	1	1	0	0	0	0	0	1	0
0	0	0	0	1	1	1	1	0	1	0	0	0
0	0	0	0	1	1	1	1	0	0	1	0	1
0	0	0	1	1	1	1	0	0	0	1	0	0
1	0	0	1	1	1	1	1	0	0	0	1	1
0	0	0	0	0	1	1	1	0	0	0	1	0
0	0	0	0	1	1	1	1	1	0	0	0	0
0	0	0	0	0	1	1	1	1	0	0	0	0
0	0	1	1	1	1	1	1	1	0	0	0	1
0	0	0	0	1	1	1	1	0	0	0	1	1
0	0	0	0	1	1	1	1	0	1	0	0	0
0	1	1	1	1	1	1	1	1	0	0	0	0
0	0	0	0	1	1	1	1	0	0	0	1	1
0	0	0	0	1	1	1	1	1	0	0	0	0
0	0	0	0	1	1	1	1	0	0	1	0	0
0	0	0	1	1	1	1	1	0	0	0	1	1
0	0	0	1	1	1	1	1	0	1	0	0	1
0	0	0	0	0	1	1	1	1	0	0	0	0
0	0	0	0	1	1	0	0	0	1	0	0	0
0	1	1	1	1	1	1	1	1	0	0	0	1
0	0	0	0	1	1	1	1	0	1	0	0	0
1	0	1	1	1	1	1	1	0	0	0	1	0
0	0	0	0	1	1	1	1	1	0	0	0	0
0	0	0	1	1	1	1	1	0	1	0	0	0
0	0	0	0	1	1	1	1	0	1	0	0	1
0	0	0	1	1	1	1	1	1	0	0	0	0
0	1	1	1	1	1	1	1	1	0	0	0	0
0	1	1	1	1	1	1	1	1	0	0	0	0
0	0	0	0	1	1	1	1	0	1	0	0	0
0	0	0	0	1	1	1	1	0	0	0	1	0
0	0	0	1	1	1	1	1	0	0	1	0	0
0	0	0	0	1	1	1	1	1	0	0	0	1
0	0	0	0	1	1	1	1	0	1	0	0	0
0	0	0	0	1	1	1	1	1	0	0	0	0
0	0	1	1	1	1	1	1	0	1	0	0	1
0	0	0	0	1	1	1	1	0	0	1	0	0
0	0	0	0	1	1	1	1	0	0	0	1	1
0	0	0	0	0	1	1	1	0	0	1	0	1
0	0	0	0	1	1	1	1	1	0	0	0	0
0	0	0	0	0	1	1	1	1	0	0	0	0
1	1	1	1	1	1	1	1	0	0	1	0	1
0	0	0	0	0	1	1	1	0	0	0	1	1
0	0	0	0	1	1	1	1	0	0	0	1	0
0	0	0	0	1	1	1	1	0	0	0	1	0
0	0	0	0	0	1	1	1	0	0	0	1	1
1	0	0	1	1	1	1	1	1	0	0	0	0
0	0	0	0	0	1	1	1	0	0	0	1	0
0	0	0	0	0	1	1	1	1	0	0	0	1
0	0	0	0	0	1	1	1	0	0	1	0	0
0	0	0	0	0	1	1	1	1	0	0	0	0
0	0	0	0	0	1	1	1	0	0	0	1	1
1	0	0	0	1	1	1	1	1	0	0	0	0
0	1	1	1	1	0	1	0	0	0	1	0	1
0	0	0	0	0	1	1	1	0	0	0	1	0
0	1	1	1	1	1	1	1	1	0	0	0	0
0	0	0	0	1	1	1	1	0	0	0	1	1
1	0	0	1	1	1	1	1	1	0	0	0	0
0	0	0	0	1	1	1	1	0	1	0	0	0
0	0	0	0	1	1	1	1	0	0	0	1	1
0	1	1	1	1	1	1	1	0	1	0	0	0
0	0	0	0	1	1	1	1	0	1	0	0	1
0	0	0	0	0	1	1	1	1	0	0	0	0
0	0	1	1	1	1	1	0	0	1	0	0	1
0	0	0	0	1	1	1	1	0	1	0	0	1
0	0	0	0	0	1	1	1	1	0	0	0	1
0	0	0	0	1	1	1	1	0	0	1	0	0
1	0	0	0	1	1	0	0	0	0	0	1	1
0	0	0	0	1	1	1	1	0	0	0	1	0
0	0	0	0	1	1	0	0	0	0	0	1	1
0	0	0	0	1	1	1	1	0	0	1	0	0
0	0	0	0	1	1	1	1	0	0	0	1	1
0	0	0	0	1	1	1	1	1	0	0	0	1
0	0	0	0	1	1	1	1	0	0	0	1	0
0	0	0	0	1	1	1	1	0	0	0	1	1
0	0	0	0	1	1	1	0	0	0	0	1	0
0	0	0	0	1	1	1	1	0	0	0	1	0
1	0	0	0	1	1	1	1	0	1	0	0	0
0	0	0	1	1	1	1	1	0	0	0	1	0
1	0	0	0	1	1	1	1	1	0	0	0	0
0	1	1	1	1	1	1	1	0	1	0	0	0
1	0	0	0	0	1	1	1	0	0	0	1	0
0	0	0	0	1	1	1	1	0	1	0	0	1
0	0	0	0	0	1	1	1	0	1	0	0	0
0	0	0	0	1	1	1	1	1	0	0	0	1
1	0	0	0	1	1	1	1	0	0	0	1	0
0	0	0	0	1	1	1	1	0	0	1	0	0
0	0	0	0	1	1	1	0	0	0	0	1	0
0	0	0	0	0	1	1	1	1	0	0	0	0
0	0	0	0	1	1	1	1	0	0	1	0	0
0	0	0	0	0	1	1	1	0	0	0	1	0
0	0	0	1	1	1	1	1	1	0	0	0	0
0	0	0	1	1	1	1	1	0	0	0	1	1
0	0	0	1	1	1	1	1	1	0	0	0	0
0	0	0	0	1	1	1	1	0	1	0	0	0
1	0	1	1	1	1	1	1	0	1	0	0	0
0	0	0	1	1	1	0	0	0	0	0	1	1
0	0	0	0	1	1	1	1	0	0	0	1	0
0	0	0	0	1	1	1	0	0	1	0	0	0
1	0	0	0	1	1	1	1	0	0	0	1	1
0	0	0	0	1	1	1	1	1	0	0	0	0
0	0	0	0	1	1	1	1	0	0	0	1	0
1	0	0	0	1	1	1	1	0	1	0	0	0
0	0	0	0	1	1	1	0	0	0	1	0	0
1	0	0	0	0	1	1	1	0	0	0	1	0
0	1	1	1	1	1	1	1	1	0	0	0	0
0	0	0	0	1	1	1	1	0	0	0	1	1
0	0	0	0	1	1	1	1	0	0	1	0	1
1	0	1	1	1	1	1	1	1	0	0	0	0
0	0	0	1	1	1	1	1	0	1	0	0	0
1	0	1	1	1	1	1	1	0	1	0	0	0
0	0	0	0	1	1	1	1	0	0	0	1	1
0	0	0	0	0	1	1	1	1	0	0	0	0
0	0	0	0	1	1	1	1	0	0	1	0	0
1	0	0	0	1	1	1	1	1	0	0	0	0
0	0	0	0	1	1	1	1	1	0	0	0	0
0	1	1	1	1	1	1	0	1	0	0	0	1
0	0	0	0	1	1	1	1	1	0	0	0	0
0	0	0	0	1	1	1	1	0	0	1	0	1
0	0	0	0	1	1	1	1	0	0	1	0	1
1	0	0	0	1	1	1	1	0	0	0	1	0
0	0	1	1	1	1	1	1	0	1	0	0	1
0	0	1	1	1	1	1	1	0	0	1	0	1
0	0	0	0	1	1	1	1	0	0	1	0	0
0	1	1	1	1	1	1	1	1	0	0	0	1
0	0	0	0	1	1	1	0	0	0	1	0	0
0	0	0	0	0	1	1	1	0	1	0	0	0
0	0	0	0	1	1	1	1	0	0	0	1	0
0	0	0	0	1	1	1	1	0	0	0	1	1
0	0	0	0	1	1	1	1	0	0	0	1	1
0	0	1	1	1	1	1	1	0	1	0	0	1
0	0	0	1	1	1	1	0	0	0	0	1	0
1	0	0	0	1	1	1	1	1	0	0	0	0
0	0	0	0	0	1	1	1	0	0	1	0	0
0	0	0	0	1	1	1	1	0	0	0	1	1
0	0	0	1	1	1	1	1	1	0	0	0	0
0	0	0	1	1	1	1	1	0	0	0	1	1
0	0	0	0	0	1	1	1	0	0	0	1	1
0	0	0	0	1	1	0	0	0	0	0	1	1
0	0	0	0	1	1	1	1	1	0	0	0	1
1	0	0	0	1	1	1	1	0	0	0	1	0
0	0	0	0	1	1	1	1	1	0	0	0	0
0	0	0	0	1	1	1	1	0	0	1	0	0
0	0	0	0	1	1	0	0	0	0	0	1	1
0	0	0	0	0	1	1	1	0	0	0	1	0
0	0	1	1	1	1	1	1	1	0	0	0	0
0	0	0	1	1	1	1	1	0	1	0	0	0
0	0	0	0	1	1	1	1	1	0	0	0	0
0	1	1	1	1	1	1	1	0	1	0	0	1
0	0	0	0	1	1	1	1	1	0	0	0	0
0	0	0	0	1	1	1	0	0	0	0	1	1
0	0	0	0	1	1	1	1	1	0	0	0	0
0	0	0	0	1	1	0	0	0	0	0	1	1
0	0	0	0	1	1	1	1	0	0	1	0	1
0	1	1	1	1	1	1	1	1	0	0	0	1
0	0	0	1	1	0	1	0	0	0	0	1	1
0	0	0	0	0	1	1	1	1	0	0	0	0
1	0	0	0	1	1	1	1	1	0	0	0	1
0	1	1	1	1	1	1	1	1	0	0	0	1
0	0	0	0	0	1	1	1	0	1	0	0	1
0	0	0	0	1	1	1	1	0	0	0	1	0
0	0	0	0	1	1	1	1	0	0	0	1	1
[truncated: 4,908 more rows]
