# Supplementary material
Source: ML conference proceedings conference paper supplement (https://proceedings.neurips.cc/paper_files/paper/2022/hash/5afaa8b4dd18eb1eed055d2d821b58ae-Abstract.html)
Supplement: Supplementary file 1 [file 5afaa8b4dd18eb1eed055d2d821b58ae-Supplemental-Conference.zip › 6769_exploring_the_whole_rashomon_s-Supplementary Material/6769_code_repo/experiments/datasets/coupon/bar-7.csv]

passanger2	age0	age1	age2	age3	age4	age5	age6	Bar0	Bar1	Bar2	Bar3	Restaurant20to50>=4	direction_same	Y
0	1	0	0	0	0	0	0	0	0	0	0	0	0	1
0	1	0	0	0	0	0	0	0	0	0	0	0	1	1
0	1	0	0	0	0	0	0	0	0	0	0	0	0	1
0	0	0	0	0	0	1	0	0	0	0	0	0	0	0
0	0	0	0	0	0	1	0	0	0	0	0	0	1	0
0	0	0	0	0	0	1	0	0	0	0	0	0	0	0
1	0	0	0	0	0	1	0	0	0	0	1	0	0	1
0	0	0	0	0	0	1	0	0	0	0	1	0	1	1
0	0	0	0	0	0	1	0	0	0	0	1	0	0	1
0	1	0	0	0	0	0	0	1	0	0	0	0	0	1
0	1	0	0	0	0	0	0	1	0	0	0	0	1	1
0	1	0	0	0	0	0	0	1	0	0	0	0	0	0
0	0	1	0	0	0	0	0	1	0	0	0	0	0	1
0	0	1	0	0	0	0	0	1	0	0	0	0	1	1
0	0	1	0	0	0	0	0	1	0	0	0	0	0	1
1	0	1	0	0	0	0	0	0	0	0	0	0	0	0
0	0	1	0	0	0	0	0	0	0	0	0	0	1	0
0	0	1	0	0	0	0	0	0	0	0	0	0	0	0
0	0	1	0	0	0	0	0	0	0	1	0	1	0	1
0	0	1	0	0	0	0	0	0	0	1	0	1	1	1
0	0	1	0	0	0	0	0	0	0	1	0	1	0	1
0	0	1	0	0	0	0	0	0	0	0	0	0	0	0
0	0	1	0	0	0	0	0	0	0	0	0	0	0	1
0	1	0	0	0	0	0	0	0	0	0	1	0	0	0
0	1	0	0	0	0	0	0	0	0	0	1	0	1	1
0	1	0	0	0	0	0	0	0	0	0	1	0	0	0
0	1	0	0	0	0	0	0	1	0	0	0	0	0	0
0	1	0	0	0	0	0	0	1	0	0	0	0	0	1
0	1	0	0	0	0	0	0	1	0	0	0	0	1	1
0	1	0	0	0	0	0	0	1	0	0	0	0	0	1
0	1	0	0	0	0	0	0	1	0	0	0	0	0	1
0	1	0	0	0	0	0	0	1	0	0	0	0	1	1
0	1	0	0	0	0	0	0	1	0	0	0	0	0	0
1	0	0	1	0	0	0	0	0	0	0	0	0	0	0
0	0	0	1	0	0	0	0	0	0	0	0	0	1	1
0	0	0	1	0	0	0	0	0	0	0	0	0	0	0
1	0	0	0	0	1	0	0	0	0	0	0	0	0	0
0	0	0	0	0	1	0	0	0	0	0	0	0	1	0
0	0	0	0	0	1	0	0	0	0	0	0	0	0	0
1	0	0	0	0	1	0	0	0	0	0	0	0	0	0
0	0	0	0	0	1	0	0	0	0	0	0	0	1	0
0	0	0	0	0	1	0	0	0	0	0	0	0	0	0
0	1	0	0	0	0	0	0	0	0	0	0	0	0	0
0	1	0	0	0	0	0	0	0	0	0	0	0	1	1
0	1	0	0	0	0	0	0	0	0	0	0	0	0	1
1	0	0	1	0	0	0	0	0	0	0	1	1	0	0
0	0	0	1	0	0	0	0	0	0	0	1	1	1	1
0	0	0	1	0	0	0	0	0	0	0	1	1	0	0
1	0	0	1	0	0	0	0	0	0	0	0	0	0	0
0	0	0	1	0	0	0	0	0	0	0	0	0	1	0
0	0	0	1	0	0	0	0	0	0	0	0	0	0	0
0	1	0	0	0	0	0	0	1	0	0	0	1	0	1
0	1	0	0	0	0	0	0	1	0	0	0	1	1	1
0	1	0	0	0	0	0	0	1	0	0	0	1	0	1
0	0	0	0	0	0	0	1	0	0	0	0	0	0	0
0	0	0	0	0	0	0	1	0	0	0	0	0	0	0
0	0	0	0	0	0	0	1	0	0	0	0	0	1	1
0	0	0	0	0	0	0	1	0	0	0	0	0	0	1
0	0	1	0	0	0	0	0	0	0	0	0	0	0	1
0	0	1	0	0	0	0	0	0	0	0	0	0	1	0
0	0	1	0	0	0	0	0	0	0	0	0	0	0	1
0	0	0	1	0	0	0	0	0	0	1	0	1	0	0
0	0	0	1	0	0	0	0	0	0	1	0	1	1	1
0	0	1	0	0	0	0	0	0	0	0	0	0	0	0
0	0	1	0	0	0	0	0	0	0	0	0	0	1	0
0	0	1	0	0	0	0	0	0	0	0	0	0	0	0
1	0	0	0	0	0	0	1	1	0	0	0	0	0	1
0	0	0	0	0	0	0	1	1	0	0	0	0	1	1
0	0	0	0	0	0	0	1	1	0	0	0	0	0	1
0	0	0	0	0	0	1	0	0	0	0	0	0	0	0
0	0	0	0	0	0	1	0	0	0	0	0	0	1	0
0	0	0	0	0	0	1	0	0	0	0	0	0	0	0
0	0	0	1	0	0	0	0	0	1	0	0	0	0	1
0	0	0	1	0	0	0	0	0	1	0	0	0	1	1
0	0	0	1	0	0	0	0	0	1	0	0	0	0	1
0	0	1	0	0	0	0	0	0	1	0	0	0	0	1
0	0	1	0	0	0	0	0	0	1	0	0	0	1	1
0	0	1	0	0	0	0	0	0	1	0	0	0	0	0
1	1	0	0	0	0	0	0	0	0	0	0	0	0	0
0	1	0	0	0	0	0	0	0	0	0	0	0	1	0
0	1	0	0	0	0	0	0	0	0	0	0	0	0	0
0	0	0	0	0	1	0	0	0	0	0	1	0	0	1
0	0	0	0	0	1	0	0	0	0	0	1	0	1	1
0	0	0	0	0	1	0	0	0	0	0	1	0	0	1
0	0	0	1	0	0	0	0	1	0	0	0	0	0	1
0	0	0	1	0	0	0	0	1	0	0	0	0	0	1
0	0	0	1	0	0	0	0	1	0	0	0	0	1	1
0	0	0	1	0	0	0	0	1	0	0	0	0	0	1
1	0	0	0	1	0	0	0	0	0	0	1	0	0	0
0	0	0	0	1	0	0	0	0	0	0	1	0	1	1
0	0	0	0	1	0	0	0	0	0	0	1	0	0	0
0	0	0	0	1	0	0	0	0	0	0	1	0	0	0
0	0	0	0	1	0	0	0	0	0	0	1	0	0	1
0	0	0	0	1	0	0	0	0	0	0	1	0	1	1
0	0	0	0	1	0	0	0	0	0	0	1	0	0	1
0	0	0	0	0	1	0	0	0	0	0	0	0	0	1
0	0	0	0	0	1	0	0	0	0	0	0	0	1	1
0	0	0	0	0	1	0	0	0	0	0	0	0	0	0
0	0	0	0	0	0	0	1	1	0	0	0	0	0	0
0	0	0	0	0	0	0	1	1	0	0	0	0	0	1
0	0	0	0	0	0	0	1	1	0	0	0	0	1	1
0	0	0	0	0	0	0	1	1	0	0	0	0	0	1
0	0	1	0	0	0	0	0	1	0	0	0	0	0	1
0	0	1	0	0	0	0	0	1	0	0	0	0	1	1
0	0	1	0	0	0	0	0	1	0	0	0	0	0	1
1	0	0	0	0	0	1	0	0	0	0	1	0	0	0
0	0	0	0	0	0	1	0	0	0	0	1	0	1	1
0	0	0	0	0	0	1	0	0	0	0	1	0	0	1
1	0	0	0	0	0	1	0	0	0	0	0	0	0	0
0	0	0	0	0	0	1	0	0	0	0	0	0	1	1
0	0	0	0	0	0	1	0	0	0	0	0	0	0	0
1	0	0	0	0	0	0	1	0	0	0	0	0	0	0
0	0	0	0	0	0	0	1	0	0	0	0	0	1	1
0	0	0	0	0	0	0	1	0	0	0	0	0	0	0
0	0	1	0	0	0	0	0	0	0	0	0	0	0	0
0	0	1	0	0	0	0	0	0	0	0	0	0	0	1
0	0	1	0	0	0	0	0	0	0	0	0	0	1	1
0	0	1	0	0	0	0	0	0	0	0	0	0	0	1
0	1	0	0	0	0	0	0	1	0	0	0	0	0	0
0	1	0	0	0	0	0	0	1	0	0	0	0	1	0
0	1	0	0	0	0	0	0	1	0	0	0	0	0	0
0	0	0	1	0	0	0	0	1	0	0	0	1	0	0
0	0	0	1	0	0	0	0	1	0	0	0	1	1	1
0	0	0	1	0	0	0	0	1	0	0	0	1	0	1
0	1	0	0	0	0	0	0	0	0	0	1	0	0	0
0	1	0	0	0	0	0	0	0	0	0	1	0	0	1
0	1	0	0	0	0	0	0	0	0	0	1	0	1	1
0	1	0	0	0	0	0	0	0	0	0	1	0	0	0
1	0	0	0	1	0	0	0	0	0	0	1	0	0	0
0	0	0	0	1	0	0	0	0	0	0	1	0	1	0
0	0	0	0	1	0	0	0	0	0	0	1	0	0	0
1	0	0	1	0	0	0	0	0	0	0	0	0	0	0
0	0	0	1	0	0	0	0	0	0	0	0	0	1	0
0	0	0	1	0	0	0	0	0	0	0	0	0	0	0
0	0	0	0	0	0	0	1	1	0	0	0	0	0	0
0	0	0	0	0	0	0	1	1	0	0	0	0	1	1
0	0	0	0	0	0	0	1	1	0	0	0	0	0	1
0	0	0	0	0	0	0	1	0	0	0	0	0	0	0
0	0	0	0	0	0	0	1	0	0	0	0	0	0	0
0	0	0	0	0	0	0	1	0	0	0	0	0	1	0
0	0	0	0	0	0	0	1	0	0	0	0	0	0	0
0	0	0	1	0	0	0	0	0	0	0	1	0	0	0
0	0	0	1	0	0	0	0	0	0	0	1	0	0	1
0	0	0	1	0	0	0	0	0	0	0	1	0	1	1
0	0	0	1	0	0	0	0	0	0	0	1	0	0	0
1	0	0	0	0	1	0	0	0	0	0	0	0	0	0
0	0	0	0	0	1	0	0	0	0	0	0	0	1	0
0	0	0	0	0	1	0	0	0	0	0	0	0	0	0
1	0	0	0	0	1	0	0	0	0	0	0	0	0	0
0	0	0	0	0	1	0	0	0	0	0	0	0	1	0
0	0	0	0	0	1	0	0	0	0	0	0	0	0	0
1	0	0	0	1	0	0	0	0	0	0	1	0	0	0
0	0	0	0	1	0	0	0	0	0	0	1	0	1	0
0	0	0	0	1	0	0	0	0	0	0	1	0	0	0
0	0	0	1	0	0	0	0	0	0	0	1	0	0	0
0	0	0	1	0	0	0	0	0	0	0	1	0	0	1
0	0	0	1	0	0	0	0	0	0	0	1	0	1	0
0	0	0	1	0	0	0	0	0	0	0	1	0	0	0
1	0	1	0	0	0	0	0	1	0	0	0	1	0	1
0	0	1	0	0	0	0	0	1	0	0	0	1	1	1
0	0	1	0	0	0	0	0	1	0	0	0	1	0	1
0	0	0	0	0	0	0	0	0	0	0	0	0	0	1
0	0	0	0	0	0	0	0	0	0	0	0	0	1	1
0	0	0	0	0	0	0	0	0	0	0	0	0	0	0
0	0	1	0	0	0	0	0	0	0	0	1	0	0	1
0	0	1	0	0	0	0	0	0	0	0	1	0	1	0
0	0	1	0	0	0	0	0	0	0	0	1	0	0	0
0	0	0	0	0	0	0	1	0	0	0	0	0	0	0
0	0	0	0	0	0	0	1	0	0	0	0	0	1	0
0	0	0	0	0	0	0	1	0	0	0	0	0	0	0
0	0	0	0	0	0	0	1	0	0	0	0	0	0	0
0	0	0	0	0	0	0	1	0	0	0	0	0	0	0
0	0	0	0	0	0	0	1	0	0	0	0	0	1	0
0	0	0	0	0	0	0	1	0	0	0	0	0	0	0
0	1	0	0	0	0	0	0	0	0	0	0	0	0	0
0	1	0	0	0	0	0	0	0	0	0	0	0	0	0
0	1	0	0	0	0	0	0	0	0	0	0	0	1	0
0	1	0	0	0	0	0	0	0	0	0	0	0	0	0
0	0	0	0	0	0	1	0	0	0	0	0	0	0	0
0	0	0	0	0	0	1	0	0	0	0	0	0	1	0
0	0	0	0	0	0	1	0	0	0	0	0	0	0	0
0	0	1	0	0	0	0	0	1	0	0	0	0	0	1
0	0	1	0	0	0	0	0	1	0	0	0	0	0	1
0	0	1	0	0	0	0	0	1	0	0	0	0	1	1
0	0	1	0	0	0	0	0	1	0	0	0	0	0	0
0	0	0	0	0	1	0	0	1	0	0	0	0	0	1
0	0	0	0	0	1	0	0	1	0	0	0	0	0	1
0	0	0	0	0	1	0	0	1	0	0	0	0	1	1
0	0	0	0	0	1	0	0	1	0	0	0	0	0	1
0	0	0	0	0	0	0	1	0	0	0	0	0	0	1
0	0	0	0	0	0	0	1	0	0	0	0	0	1	1
0	0	0	0	0	0	0	1	0	0	0	0	0	0	1
1	0	0	0	1	0	0	0	0	0	0	1	0	0	0
0	0	0	0	1	0	0	0	0	0	0	1	0	1	0
0	0	0	0	1	0	0	0	0	0	0	1	0	0	0
0	0	0	0	0	0	1	0	0	0	0	0	0	0	0
0	0	0	0	0	0	1	0	0	0	0	0	0	1	0
0	0	0	0	0	0	1	0	0	0	0	0	0	0	0
1	0	0	0	0	0	1	0	0	0	0	1	0	0	0
0	0	0	0	0	0	1	0	0	0	0	1	0	1	1
0	0	0	0	0	0	1	0	0	0	0	1	0	0	0
0	0	0	0	0	0	0	1	0	0	0	0	0	0	0
0	0	0	0	0	0	0	1	0	0	0	0	0	0	0
0	0	0	0	0	0	0	1	0	0	0	0	0	1	0
0	0	0	0	0	0	0	1	0	0	0	0	0	0	1
0	0	0	1	0	0	0	0	0	0	0	0	0	0	0
0	0	0	1	0	0	0	0	0	0	0	0	0	0	0
0	0	0	1	0	0	0	0	0	0	0	0	0	1	0
0	0	0	1	0	0	0	0	0	0	0	0	0	0	0
1	0	0	0	1	0	0	0	0	0	0	0	0	0	0
0	0	0	0	1	0	0	0	0	0	0	0	0	1	0
0	0	0	0	1	0	0	0	0	0	0	0	0	0	0
0	1	0	0	0	0	0	0	0	0	0	1	0	0	1
0	1	0	0	0	0	0	0	0	0	0	1	0	1	1
0	1	0	0	0	0	0	0	0	0	0	1	0	0	1
0	0	0	1	0	0	0	0	0	0	0	1	0	0	0
0	0	0	1	0	0	0	0	0	0	0	1	0	1	1
0	0	0	1	0	0	0	0	0	0	0	1	0	0	0
1	0	0	0	0	1	0	0	0	0	0	1	0	0	0
0	0	0	0	0	1	0	0	0	0	0	1	0	1	0
0	0	0	0	0	1	0	0	0	0	0	1	0	0	0
0	0	1	0	0	0	0	0	1	0	0	0	1	0	1
0	0	1	0	0	0	0	0	1	0	0	0	1	1	1
0	0	1	0	0	0	0	0	1	0	0	0	1	0	1
1	0	1	0	0	0	0	0	1	0	0	0	0	0	0
0	0	1	0	0	0	0	0	1	0	0	0	0	1	1
0	0	1	0	0	0	0	0	1	0	0	0	0	0	1
1	0	0	0	0	0	0	1	0	0	1	0	0	0	1
0	0	0	0	0	0	0	1	0	0	1	0	0	1	1
0	0	0	0	0	0	0	1	0	0	1	0	0	0	1
0	0	0	0	0	0	1	0	0	0	0	0	0	0	1
0	0	0	0	0	0	1	0	0	0	0	0	0	1	0
0	0	0	0	0	0	1	0	0	0	0	0	0	0	1
1	0	1	0	0	0	0	0	0	0	0	0	0	0	0
0	0	1	0	0	0	0	0	0	0	0	0	0	1	0
0	0	1	0	0	0	0	0	0	0	0	0	0	0	0
0	0	1	0	0	0	0	0	0	0	0	0	0	0	0
0	0	1	0	0	0	0	0	0	0	0	0	0	0	0
0	0	1	0	0	0	0	0	0	0	0	0	0	1	0
0	0	1	0	0	0	0	0	0	0	0	0	0	0	0
0	0	1	0	0	0	0	0	0	0	0	0	0	0	1
0	0	1	0	0	0	0	0	0	0	0	0	0	1	1
0	0	1	0	0	0	0	0	0	0	0	0	0	0	1
0	1	0	0	0	0	0	0	0	1	0	0	0	0	0
0	1	0	0	0	0	0	0	0	1	0	0	0	0	1
0	1	0	0	0	0	0	0	0	1	0	0	0	1	1
0	1	0	0	0	0	0	0	0	1	0	0	0	0	1
1	0	0	0	1	0	0	0	1	0	0	0	0	0	0
0	0	0	0	1	0	0	0	1	0	0	0	0	1	1
0	0	0	0	1	0	0	0	1	0	0	0	0	0	1
1	0	0	0	0	0	0	1	0	0	0	0	0	0	0
0	0	0	0	0	0	0	1	0	0	0	0	0	1	0
0	0	0	0	0	0	0	1	0	0	0	0	0	0	0
0	0	0	0	0	1	0	0	0	0	0	1	0	0	1
0	0	0	0	0	1	0	0	0	0	0	1	0	1	1
0	0	0	0	0	1	0	0	0	0	0	1	0	0	1
0	1	0	0	0	0	0	0	1	0	0	0	0	0	1
0	1	0	0	0	0	0	0	1	0	0	0	0	1	1
0	1	0	0	0	0	0	0	1	0	0	0	0	0	1
0	1	0	0	0	0	0	0	0	0	0	1	0	0	1
0	1	0	0	0	0	0	0	0	0	0	1	0	1	1
0	1	0	0	0	0	0	0	0	0	0	1	0	0	1
0	0	0	1	0	0	0	0	0	0	0	1	0	0	0
0	0	0	1	0	0	0	0	0	0	0	1	0	1	0
0	0	0	1	0	0	0	0	0	0	0	1	0	0	0
0	0	0	1	0	0	0	0	0	0	0	1	0	0	0
0	0	0	1	0	0	0	0	0	0	0	1	0	1	0
0	0	0	1	0	0	0	0	0	0	0	1	0	0	0
1	0	0	0	0	1	0	0	0	0	0	1	0	0	0
0	0	0	0	0	1	0	0	0	0	0	1	0	1	1
0	0	0	0	0	1	0	0	0	0	0	1	0	0	1
1	0	0	0	1	0	0	0	1	0	0	0	0	0	0
0	0	0	0	1	0	0	0	1	0	0	0	0	1	1
0	0	0	0	1	0	0	0	1	0	0	0	0	0	1
0	1	0	0	0	0	0	0	0	0	0	0	0	0	1
0	1	0	0	0	0	0	0	0	0	0	0	0	0	0
0	1	0	0	0	0	0	0	0	0	0	0	0	1	1
0	1	0	0	0	0	0	0	0	0	0	0	0	0	1
0	0	0	0	0	0	0	1	0	0	0	1	0	0	0
0	0	0	0	0	0	0	1	0	0	0	1	0	0	1
0	0	0	0	0	0	0	1	0	0	0	1	0	1	1
0	0	0	0	0	0	0	1	0	0	0	1	0	0	0
1	0	1	0	0	0	0	0	0	0	0	1	0	0	0
0	0	1	0	0	0	0	0	0	0	0	1	0	1	1
0	0	1	0	0	0	0	0	0	0	0	1	0	0	1
1	0	0	0	1	0	0	0	0	1	0	0	0	0	1
0	0	0	0	1	0	0	0	0	1	0	0	0	1	1
0	0	0	0	1	0	0	0	0	1	0	0	0	0	1
1	0	0	0	1	0	0	0	0	0	0	0	0	0	0
0	0	0	0	1	0	0	0	0	0	0	0	0	1	0
0	0	0	0	1	0	0	0	0	0	0	0	0	0	0
0	0	1	0	0	0	0	0	0	1	0	0	0	0	1
0	0	1	0	0	0	0	0	0	1	0	0	0	1	1
0	0	1	0	0	0	0	0	0	1	0	0	0	0	0
0	1	0	0	0	0	0	0	0	0	0	1	0	0	1
0	1	0	0	0	0	0	0	0	0	0	1	0	1	1
0	1	0	0	0	0	0	0	0	0	0	1	0	0	1
1	0	0	0	1	0	0	0	0	0	0	0	0	0	0
0	0	0	0	1	0	0	0	0	0	0	0	0	1	1
0	0	0	0	1	0	0	0	0	0	0	0	0	0	0
0	1	0	0	0	0	0	0	0	1	0	0	0	0	1
0	1	0	0	0	0	0	0	0	1	0	0	0	1	1
0	1	0	0	0	0	0	0	0	1	0	0	0	0	1
0	1	0	0	0	0	0	0	1	0	0	0	0	0	0
0	1	0	0	0	0	0	0	1	0	0	0	0	1	1
0	1	0	0	0	0	0	0	1	0	0	0	0	0	1
0	0	0	0	1	0	0	0	0	1	0	0	0	0	0
0	0	0	0	1	0	0	0	0	1	0	0	0	0	1
0	0	0	0	1	0	0	0	0	1	0	0	0	1	1
0	0	0	0	1	0	0	0	0	1	0	0	0	0	1
0	0	1	0	0	0	0	0	0	0	0	0	0	0	0
0	0	1	0	0	0	0	0	0	0	0	0	0	0	1
0	0	1	0	0	0	0	0	0	0	0	0	0	1	0
0	0	1	0	0	0	0	0	0	0	0	0	0	0	0
0	1	0	0	0	0	0	0	0	0	0	0	0	0	0
0	1	0	0	0	0	0	0	0	0	0	0	0	1	0
0	1	0	0	0	0	0	0	0	0	0	0	0	0	0
0	0	0	0	0	1	0	0	0	0	0	1	0	0	1
0	0	0	0	0	1	0	0	0	0	0	1	0	1	1
0	0	0	0	0	1	0	0	0	0	0	1	0	0	1
0	0	0	0	0	0	0	1	0	0	0	0	0	0	0
0	0	0	0	0	0	0	1	0	0	0	0	0	0	0
0	0	0	0	0	0	0	1	0	0	0	0	0	1	0
0	0	0	0	0	0	0	1	0	0	0	0	0	0	0
0	0	0	1	0	0	0	0	0	1	0	0	0	0	1
0	0	0	1	0	0	0	0	0	1	0	0	0	1	1
0	0	0	1	0	0	0	0	0	1	0	0	0	0	0
1	0	0	1	0	0	0	0	0	0	0	1	0	0	0
0	0	0	1	0	0	0	0	0	0	0	1	0	1	1
0	0	0	1	0	0	0	0	0	0	0	1	0	0	1
0	1	0	0	0	0	0	0	0	1	0	0	0	0	0
0	1	0	0	0	0	0	0	0	1	0	0	0	1	1
0	1	0	0	0	0	0	0	0	1	0	0	0	0	1
1	0	0	0	0	0	0	1	0	0	0	0	0	0	0
0	0	0	0	0	0	0	1	0	0	0	0	0	1	0
0	0	0	0	0	0	0	1	0	0	0	0	0	0	0
0	1	0	0	0	0	0	0	0	1	0	0	0	0	0
0	1	0	0	0	0	0	0	0	1	0	0	0	1	0
0	1	0	0	0	0	0	0	0	1	0	0	0	0	1
0	1	0	0	0	0	0	0	1	0	0	0	0	0	0
0	1	0	0	0	0	0	0	1	0	0	0	0	0	1
0	1	0	0	0	0	0	0	1	0	0	0	0	1	1
0	1	0	0	0	0	0	0	1	0	0	0	0	0	1
0	1	0	0	0	0	0	0	1	0	0	0	0	0	0
0	1	0	0	0	0	0	0	1	0	0	0	0	0	1
0	1	0	0	0	0	0	0	1	0	0	0	0	1	1
0	1	0	0	0	0	0	0	1	0	0	0	0	0	1
0	0	0	0	0	0	1	0	0	0	0	0	0	0	0
0	0	0	0	0	0	1	0	0	0	0	0	0	1	0
0	0	0	0	0	0	1	0	0	0	0	0	0	0	0
0	1	0	0	0	0	0	0	0	0	0	1	0	0	0
0	1	0	0	0	0	0	0	0	0	0	1	0	1	1
0	1	0	0	0	0	0	0	0	0	0	1	0	0	1
1	0	0	0	0	0	0	1	0	1	0	0	1	0	1
0	0	0	0	0	0	0	1	0	1	0	0	1	1	1
0	0	0	0	0	0	0	1	0	1	0	0	1	0	1
0	0	1	0	0	0	0	0	0	1	0	0	0	0	1
0	0	1	0	0	0	0	0	0	1	0	0	0	1	1
0	0	1	0	0	0	0	0	0	1	0	0	0	0	1
1	0	0	0	0	0	0	1	0	0	0	0	0	0	0
0	0	0	0	0	0	0	1	0	0	0	0	0	1	0
0	0	0	0	0	0	0	1	0	0	0	0	0	0	0
0	0	0	0	0	0	0	1	1	0	0	0	0	0	1
0	0	0	0	0	0	0	1	1	0	0	0	0	1	1
0	0	0	0	0	0	0	1	1	0	0	0	0	0	0
1	0	0	0	0	1	0	0	0	0	0	0	0	0	0
0	0	0	0	0	1	0	0	0	0	0	0	0	1	0
0	0	0	0	0	1	0	0	0	0	0	0	0	0	0
1	0	0	0	0	0	1	0	0	1	0	0	0	0	0
0	0	0	0	0	0	1	0	0	1	0	0	0	1	1
0	0	0	0	0	0	1	0	0	1	0	0	0	0	1
1	0	1	0	0	0	0	0	0	0	0	0	0	0	1
0	0	1	0	0	0	0	0	0	0	0	0	0	1	0
0	0	1	0	0	0	0	0	0	0	0	0	0	0	0
0	0	0	0	0	1	0	0	0	0	0	1	0	0	0
0	0	0	0	0	1	0	0	0	0	0	1	0	0	0
0	0	0	0	0	1	0	0	0	0	0	1	0	1	0
0	0	0	0	0	1	0	0	0	0	0	1	0	0	0
1	0	0	0	0	1	0	0	0	0	0	1	0	0	0
0	0	0	0	0	1	0	0	0	0	0	1	0	1	1
0	0	0	0	0	1	0	0	0	0	0	1	0	0	0
0	1	0	0	0	0	0	0	1	0	0	0	0	0	1
0	1	0	0	0	0	0	0	1	0	0	0	0	1	1
0	1	0	0	0	0	0	0	1	0	0	0	0	0	0
0	0	0	0	1	0	0	0	0	0	0	0	0	0	0
0	0	0	0	1	0	0	0	0	0	0	0	0	1	0
0	0	0	0	1	0	0	0	0	0	0	0	0	0	0
1	0	0	0	0	0	0	1	0	0	0	0	0	0	0
0	0	0	0	0	0	0	1	0	0	0	0	0	1	0
0	0	0	0	0	0	0	1	0	0	0	0	0	0	0
0	0	1	0	0	0	0	0	1	0	0	0	1	0	1
0	0	1	0	0	0	0	0	1	0	0	0	1	1	1
0	0	1	0	0	0	0	0	1	0	0	0	1	0	1
0	0	0	0	0	0	0	0	0	0	0	0	0	0	0
0	0	0	0	0	0	0	0	0	0	0	0	0	1	0
0	0	0	0	0	0	0	0	0	0	0	0	0	0	0
1	0	0	0	0	0	0	1	0	0	0	1	0	0	0
0	0	0	0	0	0	0	1	0	0	0	1	0	1	1
0	0	0	0	0	0	0	1	0	0	0	1	0	0	1
0	1	0	0	0	0	0	0	0	0	0	0	0	0	1
0	1	0	0	0	0	0	0	0	0	0	0	0	1	1
0	1	0	0	0	0	0	0	0	0	0	0	0	0	0
0	1	0	0	0	0	0	0	0	0	0	1	0	0	1
0	1	0	0	0	0	0	0	0	0	0	1	0	1	1
0	1	0	0	0	0	0	0	0	0	0	1	0	0	1
1	0	0	1	0	0	0	0	1	0	0	0	1	0	1
0	0	0	1	0	0	0	0	1	0	0	0	1	1	1
0	0	0	1	0	0	0	0	1	0	0	0	1	0	1
1	0	0	0	0	0	0	1	1	0	0	0	0	0	0
0	0	0	0	0	0	0	1	1	0	0	0	0	1	1
0	0	0	0	0	0	0	1	1	0	0	0	0	0	0
1	0	0	1	0	0	0	0	0	0	0	0	0	0	0
0	0	0	1	0	0	0	0	0	0	0	0	0	1	1
0	0	0	1	0	0	0	0	0	0	0	0	0	0	0
0	1	0	0	0	0	0	0	0	0	1	0	0	0	1
0	1	0	0	0	0	0	0	0	0	1	0	0	1	1
0	1	0	0	0	0	0	0	0	0	1	0	0	0	1
1	0	0	1	0	0	0	0	1	0	0	0	0	0	0
0	0	0	1	0	0	0	0	1	0	0	0	0	1	1
0	0	0	1	0	0	0	0	1	0	0	0	0	0	0
0	1	0	0	0	0	0	0	0	0	0	1	0	0	0
0	1	0	0	0	0	0	0	0	0	0	1	0	1	0
0	1	0	0	0	0	0	0	0	0	0	1	0	0	0
1	0	0	0	0	1	0	0	0	0	0	1	0	0	0
0	0	0	0	0	1	0	0	0	0	0	1	0	1	1
0	0	0	0	0	1	0	0	0	0	0	1	0	0	1
0	0	1	0	0	0	0	0	0	0	1	0	1	0	1
0	0	1	0	0	0	0	0	0	0	1	0	1	1	1
0	0	1	0	0	0	0	0	0	0	1	0	1	0	1
1	0	1	0	0	0	0	0	0	0	0	0	0	0	0
0	0	1	0	0	0	0	0	0	0	0	0	0	1	0
0	0	1	0	0	0	0	0	0	0	0	0	0	0	0
0	0	0	0	0	0	0	1	0	1	0	0	0	0	0
0	0	0	0	0	0	0	1	0	1	0	0	0	1	1
0	0	0	0	0	0	0	1	0	1	0	0	0	0	0
1	0	0	0	0	1	0	0	1	0	0	0	0	0	0
0	0	0	0	0	1	0	0	1	0	0	0	0	1	1
0	0	0	0	0	0	0	1	0	0	0	0	0	0	0
0	0	0	0	0	0	0	1	0	0	0	0	0	0	0
0	0	0	0	0	0	0	1	0	0	0	0	0	1	0
0	0	0	0	0	0	0	1	0	0	0	0	0	0	0
0	0	1	0	0	0	0	0	0	0	1	0	0	0	1
0	0	1	0	0	0	0	0	0	0	1	0	0	0	1
0	0	1	0	0	0	0	0	0	0	1	0	0	1	1
0	0	1	0	0	0	0	0	0	0	1	0	0	0	1
1	0	0	0	0	1	0	0	1	0	0	0	0	0	0
0	0	0	0	0	1	0	0	1	0	0	0	0	1	1
0	0	0	0	0	1	0	0	1	0	0	0	0	0	0
0	0	0	1	0	0	0	0	0	0	0	0	0	0	1
0	0	0	1	0	0	0	0	0	0	0	0	0	1	1
0	0	0	1	0	0	0	0	0	0	0	0	0	0	1
1	1	0	0	0	0	0	0	0	0	0	0	0	0	0
0	1	0	0	0	0	0	0	0	0	0	0	0	1	0
0	1	0	0	0	0	0	0	0	0	0	0	0	0	0
0	0	0	1	0	0	0	0	0	0	0	1	0	0	0
0	0	0	1	0	0	0	0	0	0	0	1	0	0	1
0	0	0	1	0	0	0	0	0	0	0	1	0	1	1
0	0	0	1	0	0	0	0	0	0	0	1	0	0	1
0	1	0	0	0	0	0	0	0	0	0	0	0	0	0
0	1	0	0	0	0	0	0	0	0	0	0	0	1	0
0	1	0	0	0	0	0	0	0	0	0	0	0	0	0
0	0	0	0	1	0	0	0	0	0	0	1	0	1	1
0	0	0	0	1	0	0	0	0	0	0	1	0	0	0
1	0	0	0	0	0	1	0	0	0	0	0	0	0	0
0	0	0	0	0	0	1	0	0	0	0	0	0	1	0
0	0	0	0	0	0	1	0	0	0	0	0	0	0	0
0	0	1	0	0	0	0	0	0	0	0	0	0	0	1
0	0	1	0	0	0	0	0	0	0	0	0	0	1	1
0	0	1	0	0	0	0	0	0	0	0	0	0	0	1
0	0	0	0	0	0	0	1	0	0	0	0	0	0	0
0	0	0	0	0	0	0	1	0	0	0	0	0	0	0
0	0	0	0	0	0	0	1	0	0	0	0	0	1	0
0	0	0	0	0	0	0	1	0	0	0	0	0	0	0
0	0	0	0	0	0	1	0	0	0	0	1	0	0	0
0	0	0	0	0	0	1	0	0	0	0	1	0	0	1
0	0	0	0	0	0	1	0	0	0	0	1	0	1	1
0	0	0	0	0	0	1	0	0	0	0	1	0	0	0
0	0	1	0	0	0	0	0	0	1	0	0	0	0	1
0	0	1	0	0	0	0	0	0	1	0	0	0	1	1
0	0	1	0	0	0	0	0	0	1	0	0	0	0	1
0	0	0	0	0	0	0	0	0	0	0	0	0	0	1
0	0	0	0	0	0	0	0	0	0	0	0	0	1	1
0	0	0	0	0	0	0	0	0	0	0	0	0	0	0
1	0	0	0	0	1	0	0	0	0	0	0	0	0	0
0	0	0	0	0	1	0	0	0	0	0	0	0	1	0
0	0	0	0	0	1	0	0	0	0	0	0	0	0	0
1	0	0	0	0	1	0	0	0	0	0	1	0	0	0
0	0	0	0	0	1	0	0	0	0	0	1	0	1	1
0	0	0	0	0	1	0	0	0	0	0	1	0	0	0
0	1	0	0	0	0	0	0	0	0	1	0	0	0	1
0	1	0	0	0	0	0	0	0	0	1	0	0	1	1
0	1	0	0	0	0	0	0	0	0	1	0	0	0	1
0	0	0	0	0	1	0	0	0	0	0	1	0	0	0
0	0	0	0	0	1	0	0	0	0	0	1	0	0	1
0	0	0	0	0	1	0	0	0	0	0	1	0	1	1
0	0	0	0	0	1	0	0	0	0	0	1	0	0	1
0	0	1	0	0	0	0	0	0	0	0	0	0	0	0
0	0	1	0	0	0	0	0	0	0	0	0	0	1	0
0	0	1	0	0	0	0	0	0	0	0	0	0	0	0
0	1	0	0	0	0	0	0	0	1	0	0	0	0	1
0	1	0	0	0	0	0	0	0	1	0	0	0	1	1
0	1	0	0	0	0	0	0	0	1	0	0	0	0	1
1	0	0	1	0	0	0	0	0	0	0	1	0	0	0
0	0	0	1	0	0	0	0	0	0	0	1	0	1	1
0	0	0	1	0	0	0	0	0	0	0	1	0	0	0
0	0	1	0	0	0	0	0	0	0	0	1	0	0	0
0	0	1	0	0	0	0	0	0	0	0	1	0	0	1
0	0	1	0	0	0	0	0	0	0	0	1	0	1	0
0	0	1	0	0	0	0	0	0	0	0	1	0	0	1
0	0	1	0	0	0	0	0	0	0	0	0	0	0	1
0	0	1	0	0	0	0	0	0	0	0	0	0	0	1
0	0	1	0	0	0	0	0	0	0	0	0	0	1	0
0	0	1	0	0	0	0	0	0	0	0	0	0	0	0
0	0	0	0	0	0	0	1	0	0	0	0	0	0	0
0	0	0	0	0	0	0	1	0	0	0	0	0	1	1
0	0	0	0	0	0	0	1	0	0	0	0	0	0	0
0	0	1	0	0	0	0	0	0	0	0	1	0	0	0
0	0	1	0	0	0	0	0	0	0	0	1	0	0	1
0	0	1	0	0	0	0	0	0	0	0	1	0	1	1
0	0	1	0	0	0	0	0	0	0	0	1	0	0	1
1	0	0	0	0	1	0	0	1	0	0	0	0	0	0
0	0	0	0	0	1	0	0	1	0	0	0	0	1	1
0	0	0	0	0	1	0	0	1	0	0	0	0	0	1
0	0	1	0	0	0	0	0	1	0	0	0	0	0	1
0	0	1	0	0	0	0	0	1	0	0	0	0	1	1
0	0	1	0	0	0	0	0	1	0	0	0	0	0	1
0	1	0	0	0	0	0	0	0	0	0	0	0	0	0
0	1	0	0	0	0	0	0	0	0	0	0	0	0	0
0	1	0	0	0	0	0	0	0	0	0	0	0	1	0
0	1	0	0	0	0	0	0	0	0	0	0	0	0	0
1	0	0	0	0	0	0	1	0	0	0	0	0	0	0
0	0	0	0	0	0	0	1	0	0	0	0	0	1	0
0	0	0	0	0	0	0	1	0	0	0	0	0	0	0
0	1	0	0	0	0	0	0	0	0	0	0	0	0	0
0	1	0	0	0	0	0	0	0	0	0	0	0	1	1
0	1	0	0	0	0	0	0	0	0	0	0	0	0	1
0	0	1	0	0	0	0	0	0	0	0	0	0	0	0
0	0	1	0	0	0	0	0	0	0	0	0	0	0	1
0	0	1	0	0	0	0	0	0	0	0	0	0	1	1
0	0	1	0	0	0	0	0	0	0	0	0	0	0	0
0	0	0	0	0	0	0	1	1	0	0	0	0	0	1
0	0	0	0	0	0	0	1	1	0	0	0	0	1	1
0	0	0	0	0	0	0	1	1	0	0	0	0	0	1
0	0	1	0	0	0	0	0	0	0	0	0	0	0	0
0	0	1	0	0	0	0	0	0	0	0	0	0	1	0
0	0	1	0	0	0	0	0	0	0	0	0	0	0	0
1	0	1	0	0	0	0	0	0	0	0	1	0	0	1
0	0	1	0	0	0	0	0	0	0	0	1	0	1	1
0	0	1	0	0	0	0	0	0	0	0	1	0	0	0
0	1	0	0	0	0	0	0	0	0	0	0	0	0	0
0	1	0	0	0	0	0	0	0	0	0	0	0	1	0
0	1	0	0	0	0	0	0	0	0	0	0	0	0	0
0	0	0	0	1	0	0	0	0	0	0	1	0	0	1
0	0	0	0	1	0	0	0	0	0	0	1	0	1	1
0	0	0	0	1	0	0	0	0	0	0	1	0	0	1
0	0	0	0	0	0	0	1	0	1	0	0	1	0	1
1	0	0	0	0	0	0	1	0	1	0	0	1	0	1
0	0	0	1	0	0	0	0	1	0	0	0	1	0	1
0	0	0	1	0	0	0	0	1	0	0	0	1	0	0
0	1	0	0	0	0	0	0	0	0	0	0	0	0	0
0	1	0	0	0	0	0	0	0	0	0	0	0	0	1
0	0	0	0	1	0	0	0	0	0	0	0	0	0	0
1	0	0	0	1	0	0	0	0	0	0	0	0	0	0
0	1	0	0	0	0	0	0	1	0	0	0	0	0	1
0	1	0	0	0	0	0	0	1	0	0	0	0	0	1
0	0	0	1	0	0	0	0	0	0	0	0	0	0	0
1	0	0	1	0	0	0	0	0	0	0	0	0	0	0
1	0	1	0	0	0	0	0	0	0	0	0	0	0	0
0	0	0	0	0	0	0	1	0	0	0	0	0	0	0
0	0	0	0	0	0	0	1	0	0	0	0	0	0	0
0	0	1	0	0	0	0	0	0	0	0	1	0	0	1
0	0	1	0	0	0	0	0	0	0	0	1	0	1	1
0	0	0	0	0	1	0	0	0	0	0	1	1	0	1
0	0	0	0	0	1	0	0	0	0	0	1	1	0	1
0	0	1	0	0	0	0	0	0	1	0	0	0	0	1
0	0	1	0	0	0	0	0	0	1	0	0	0	1	1
0	1	0	0	0	0	0	0	1	0	0	0	0	0	1
0	1	0	0	0	0	0	0	1	0	0	0	0	1	0
0	0	1	0	0	0	0	0	1	0	0	0	0	0	1
0	0	1	0	0	0	0	0	1	0	0	0	0	1	0
0	1	0	0	0	0	0	0	1	0	0	0	0	0	1
0	1	0	0	0	0	0	0	1	0	0	0	0	0	0
0	0	0	0	0	0	1	0	1	0	0	0	0	0	1
0	0	0	0	0	0	1	0	1	0	0	0	0	1	1
0	0	0	1	0	0	0	0	1	0	0	0	0	0	1
0	0	0	1	0	0	0	0	1	0	0	0	0	0	1
0	0	0	0	0	0	0	0	0	0	0	0	0	0	0
0	0	0	0	0	0	0	0	0	0	0	0	0	0	0
0	1	0	0	0	0	0	0	0	0	0	1	0	0	0
0	1	0	0	0	0	0	0	0	0	0	1	0	0	0
0	1	0	0	0	0	0	0	0	0	0	1	0	0	1
0	1	0	0	0	0	0	0	0	0	0	1	0	1	1
0	0	0	0	1	0	0	0	0	0	0	1	0	0	0
0	0	0	0	1	0	0	0	0	0	0	1	0	0	1
0	0	0	0	0	0	0	0	0	0	0	1	0	0	0
0	0	0	0	0	0	0	0	0	0	0	1	0	0	0
0	0	0	0	1	0	0	0	0	0	0	1	0	0	0
0	0	0	0	1	0	0	0	0	0	0	1	0	1	0
0	0	1	0	0	0	0	0	0	0	0	0	0	0	0
0	0	1	0	0	0	0	0	0	0	0	0	0	1	0
0	0	0	0	1	0	0	0	1	0	0	0	0	0	0
0	0	0	0	1	0	0	0	1	0	0	0	0	0	0
0	0	0	0	0	0	1	0	0	0	0	0	0	0	0
1	0	0	0	0	0	1	0	0	0	0	0	0	0	0
0	0	0	1	0	0	0	0	1	0	0	0	0	0	1
1	0	0	1	0	0	0	0	1	0	0	0	0	0	0
0	0	1	0	0	0	0	0	0	0	0	0	0	0	0
0	0	1	0	0	0	0	0	0	0	0	0	0	0	0
0	0	0	0	1	0	0	0	0	0	0	0	0	0	0
0	0	0	0	1	0	0	0	0	0	0	0	0	0	0
0	1	0	0	0	0	0	0	0	1	0	0	0	0	0
0	1	0	0	0	0	0	0	0	1	0	0	0	1	1
0	0	0	0	0	0	0	1	0	0	0	1	0	0	0
0	0	0	0	0	0	0	1	0	0	0	1	0	1	0
0	0	0	0	0	0	0	0	0	0	0	0	0	0	1
0	0	0	0	0	0	0	0	0	0	0	0	0	0	0
0	0	0	1	0	0	0	0	0	0	0	0	0	0	0
1	0	0	1	0	0	0	0	0	0	0	0	0	0	0
0	1	0	0	0	0	0	0	0	0	0	1	0	0	0
0	1	0	0	0	0	0	0	0	0	0	1	0	0	1
0	0	0	0	0	0	0	1	0	0	0	0	0	0	0
0	0	0	0	0	0	0	1	0	0	0	0	0	1	0
0	0	0	0	0	0	0	1	0	0	0	1	0	0	1
0	0	0	0	0	0	0	1	0	0	0	1	0	0	0
0	1	0	0	0	0	0	0	0	0	0	1	0	0	1
0	1	0	0	0	0	0	0	0	0	0	1	0	1	1
0	0	0	1	0	0	0	0	0	1	0	0	0	0	0
0	0	0	1	0	0	0	0	0	1	0	0	0	1	1
0	1	0	0	0	0	0	0	0	0	0	0	0	0	1
0	1	0	0	0	0	0	0	0	0	0	0	0	1	1
0	0	0	0	0	0	0	0	0	0	0	0	0	0	1
0	0	0	0	0	0	0	0	0	0	0	0	0	1	1
0	0	0	1	0	0	0	0	0	0	0	0	0	0	0
1	0	0	1	0	0	0	0	0	0	0	0	0	0	0
0	1	0	0	0	0	0	0	0	0	0	0	0	0	0
1	1	0	0	0	0	0	0	0	0	0	0	0	0	0
0	0	0	1	0	0	0	0	1	0	0	0	0	0	0
0	0	0	1	0	0	0	0	1	0	0	0	0	1	0
0	1	0	0	0	0	0	0	0	0	0	1	0	0	1
0	1	0	0	0	0	0	0	0	0	0	1	0	1	1
0	1	0	0	0	0	0	0	0	0	0	0	0	0	0
0	1	0	0	0	0	0	0	0	0	0	0	0	1	0
0	0	0	1	0	0	0	0	0	0	0	0	0	0	1
0	0	0	1	0	0	0	0	0	0	0	0	0	0	0
0	1	0	0	0	0	0	0	0	0	0	1	0	0	1
0	1	0	0	0	0	0	0	0	0	0	1	0	0	1
1	1	0	0	0	0	0	0	0	0	0	1	0	0	1
0	1	0	0	0	0	0	0	0	0	0	1	0	1	1
0	0	0	0	1	0	0	0	0	0	0	0	0	0	0
0	0	0	0	1	0	0	0	0	0	0	0	0	0	0
0	1	0	0	0	0	0	0	0	0	0	1	0	0	1
0	1	0	0	0	0	0	0	0	0	0	1	0	1	0
0	1	0	0	0	0	0	0	0	0	0	0	0	0	0
0	1	0	0	0	0	0	0	0	0	0	0	0	1	0
0	1	0	0	0	0	0	0	0	0	0	1	0	0	0
0	1	0	0	0	0	0	0	0	0	0	1	0	1	0
0	0	0	0	1	0	0	0	0	0	0	1	0	0	0
0	0	0	0	1	0	0	0	0	0	0	1	0	0	1
0	0	0	0	0	0	0	1	0	0	0	0	0	0	0
0	0	0	0	0	0	0	1	0	0	0	0	0	1	0
0	0	0	0	0	0	0	1	0	0	0	0	0	0	0
1	0	0	0	0	0	0	1	0	0	0	0	0	0	0
0	0	0	1	0	0	0	0	0	0	0	0	0	0	0
1	0	0	1	0	0	0	0	0	0	0	0	0	0	0
0	0	1	0	0	0	0	0	0	0	0	1	0	0	0
0	0	1	0	0	0	0	0	0	0	0	1	0	0	0
0	0	0	0	0	0	0	1	0	0	0	0	0	0	0
1	0	0	0	0	0	0	1	0	0	0	0	0	0	0
0	0	0	0	0	0	1	0	0	0	0	0	0	0	0
0	0	0	0	0	0	1	0	0	0	0	0	0	0	1
0	1	0	0	0	0	0	0	1	0	0	0	0	0	0
0	1	0	0	0	0	0	0	1	0	0	0	0	0	0
0	0	1	0	0	0	0	0	0	0	0	0	0	0	0
0	0	1	0	0	0	0	0	0	0	0	0	0	0	0
0	0	1	0	0	0	0	0	0	0	0	1	0	0	0
0	0	1	0	0	0	0	0	0	0	0	1	0	0	0
0	0	1	0	0	0	0	0	0	1	0	0	0	0	1
0	0	1	0	0	0	0	0	0	1	0	0	0	1	1
0	0	1	0	0	0	0	0	1	0	0	0	0	0	1
0	0	1	0	0	0	0	0	1	0	0	0	0	0	1
0	0	0	0	0	0	0	1	0	0	0	0	0	0	0
0	0	0	0	0	0	0	1	0	0	0	0	0	1	0
0	0	1	0	0	0	0	0	0	0	0	0	0	0	1
0	0	0	0	0	1	0	0	0	0	0	0	0	0	1
0	0	0	0	0	1	0	0	0	0	0	0	0	1	0
0	1	0	0	0	0	0	0	0	1	0	0	0	0	1
0	1	0	0	0	0	0	0	0	1	0	0	0	0	0
0	0	0	0	0	0	0	1	0	0	0	1	0	0	0
0	0	0	0	0	0	0	1	0	0	0	1	0	1	0
0	0	0	0	0	1	0	0	0	0	0	0	0	0	0
1	0	0	0	0	1	0	0	0	0	0	0	0	0	0
0	0	0	0	1	0	0	0	0	0	0	1	0	0	0
1	0	0	0	1	0	0	0	0	0	0	1	0	0	0
0	0	0	0	0	0	0	0	0	0	0	0	0	0	1
0	0	0	0	0	0	0	0	0	0	0	0	0	1	1
0	0	1	0	0	0	0	0	0	1	0	0	0	0	1
0	0	1	0	0	0	0	0	0	1	0	0	0	1	0
0	0	0	0	1	0	0	0	0	0	0	1	0	0	1
0	0	0	0	1	0	0	0	0	0	0	1	0	1	1
0	1	0	0	0	0	0	0	0	0	0	0	0	0	0
0	1	0	0	0	0	0	0	0	0	0	0	0	1	0
0	0	1	0	0	0	0	0	0	1	0	0	0	0	1
0	0	1	0	0	0	0	0	0	1	0	0	0	0	1
0	1	0	0	0	0	0	0	0	0	0	1	0	0	1
0	1	0	0	0	0	0	0	0	0	0	1	0	1	0
0	0	1	0	0	0	0	0	0	0	0	0	0	0	0
1	0	1	0	0	0	0	0	0	0	0	0	0	0	0
0	0	0	0	0	1	0	0	0	0	0	1	0	0	0
0	0	0	0	0	1	0	0	0	0	0	1	0	1	0
0	0	0	1	0	0	0	0	0	1	0	0	0	0	1
0	0	0	1	0	0	0	0	0	1	0	0	0	0	1
0	0	0	1	0	0	0	0	0	0	0	1	0	0	0
1	0	0	1	0	0	0	0	0	0	0	1	0	0	0
0	0	0	0	0	0	0	1	1	0	0	0	0	0	0
0	0	0	0	0	0	0	1	1	0	0	0	0	1	1
0	0	1	0	0	0	0	0	0	0	0	1	0	0	0
0	0	1	0	0	0	0	0	0	0	0	1	0	0	0
0	0	0	1	0	0	0	0	0	0	0	0	1	0	0
1	0	0	1	0	0	0	0	0	0	0	0	1	0	0
0	1	0	0	0	0	0	0	0	0	0	1	1	0	1
1	1	0	0	0	0	0	0	0	0	0	1	1	0	0
0	1	0	0	0	0	0	0	0	0	1	0	0	0	0
0	1	0	0	0	0	0	0	0	0	1	0	0	1	0
0	1	0	0	0	0	0	0	0	0	0	1	0	0	0
0	1	0	0	0	0	0	0	0	0	0	1	0	0	0
0	0	0	0	1	0	0	0	1	0	0	0	0	0	1
0	0	0	0	1	0	0	0	1	0	0	0	0	0	1
0	0	0	0	0	0	0	1	0	0	0	0	0	0	0
0	0	0	0	0	0	0	1	0	0	0	0	0	1	0
0	0	1	0	0	0	0	0	0	1	0	0	0	0	1
0	0	1	0	0	0	0	0	0	1	0	0	0	1	1
0	0	1	0	0	0	0	0	0	0	0	1	0	0	0
0	0	1	0	0	0	0	0	0	0	0	1	0	0	0
0	0	1	0	0	0	0	0	0	0	0	1	0	0	0
0	0	1	0	0	0	0	0	0	0	0	1	0	1	0
0	0	0	0	0	0	0	1	0	0	0	0	0	0	0
0	0	0	0	0	0	0	1	0	0	0	0	0	1	0
0	1	0	0	0	0	0	0	1	0	0	0	0	0	1
0	1	0	0	0	0	0	0	1	0	0	0	0	0	1
0	0	1	0	0	0	0	0	1	0	0	0	0	0	0
0	0	1	0	0	0	0	0	1	0	0	0	0	0	0
0	0	0	0	0	0	1	0	0	0	0	0	0	0	1
0	0	0	0	0	0	1	0	0	0	0	0	0	0	1
1	0	0	0	0	0	1	0	0	0	0	0	0	0	0
0	0	0	0	0	0	1	0	0	0	0	0	0	1	0
0	1	0	0	0	0	0	0	0	0	0	0	0	0	0
0	1	0	0	0	0	0	0	0	0	0	0	0	0	1
0	0	0	1	0	0	0	0	1	0	0	0	0	0	1
0	0	0	1	0	0	0	0	1	0	0	0	0	0	1
0	0	0	0	0	1	0	0	0	0	0	1	0	0	0
1	0	0	0	0	1	0	0	0	0	0	1	0	0	0
0	0	0	0	0	1	0	0	0	1	0	0	0	0	1
0	0	0	0	0	1	0	0	0	1	0	0	0	1	1
0	0	0	0	1	0	0	0	0	0	0	1	0	0	0
0	0	0	0	1	0	0	0	0	0	0	1	0	0	1
0	0	0	1	0	0	0	0	0	0	0	1	0	0	1
0	0	0	1	0	0	0	0	0	0	0	1	0	0	0
0	0	0	1	0	0	0	0	0	0	0	1	0	0	0
0	0	0	1	0	0	0	0	0	0	0	1	0	1	0
0	0	0	0	1	0	0	0	0	0	0	0	0	0	0
0	0	0	0	1	0	0	0	0	0	0	0	0	1	0
0	1	0	0	0	0	0	0	0	0	0	1	1	0	0
0	1	0	0	0	0	0	0	0	0	0	1	1	0	1
0	0	1	0	0	0	0	0	1	0	0	0	1	0	1
0	0	0	1	0	0	0	0	0	0	0	0	0	0	0
0	0	0	1	0	0	0	0	0	0	0	0	0	1	0
0	0	1	0	0	0	0	0	1	0	0	0	0	0	1
1	0	1	0	0	0	0	0	1	0	0	0	0	0	1
0	0	1	0	0	0	0	0	1	0	0	0	0	0	1
0	0	1	0	0	0	0	0	1	0	0	0	0	1	1
0	0	1	0	0	0	0	0	0	0	0	1	0	0	1
0	0	1	0	0	0	0	0	0	0	0	1	0	1	1
0	0	0	0	0	1	0	0	0	0	0	0	0	0	0
0	0	0	0	0	1	0	0	0	0	0	0	0	1	0
0	0	0	0	1	0	0	0	1	0	0	0	0	0	0
1	0	0	0	1	0	0	0	1	0	0	0	0	0	0
0	0	0	0	0	0	0	0	1	0	0	0	1	0	1
0	0	0	0	0	0	0	0	1	0	0	0	1	1	1
0	0	0	0	0	0	0	1	0	0	0	0	0	0	0
0	0	0	0	0	0	0	1	0	0	0	0	0	1	0
0	0	0	0	0	1	0	0	0	1	0	0	0	0	0
0	0	0	0	0	1	0	0	0	1	0	0	0	0	1
0	0	0	0	1	0	0	0	0	0	0	0	0	1	0
0	0	0	0	1	0	0	0	0	0	0	0	0	0	0
0	0	0	0	1	0	0	0	0	0	0	0	0	0	0
0	0	0	0	1	0	0	0	0	0	0	0	0	0	0
0	0	1	0	0	0	0	0	0	1	0	0	0	0	1
0	0	1	0	0	0	0	0	0	1	0	0	0	0	0
0	0	1	0	0	0	0	0	0	1	0	0	0	0	0
0	0	1	0	0	0	0	0	1	0	0	0	0	0	0
0	0	1	0	0	0	0	0	1	0	0	0	0	0	0
0	0	1	0	0	0	0	0	1	0	0	0	0	1	0
0	0	1	0	0	0	0	0	1	0	0	0	0	0	1
0	0	1	0	0	0	0	0	1	0	0	0	0	0	0
0	0	1	0	0	0	0	0	1	0	0	0	0	0	0
0	0	1	0	0	0	0	0	1	0	0	0	0	0	0
0	1	0	0	0	0	0	0	0	0	0	1	0	1	0
0	1	0	0	0	0	0	0	0	0	0	1	0	0	1
0	1	0	0	0	0	0	0	0	0	0	1	0	0	1
0	1	0	0	0	0	0	0	0	0	0	1	0	0	1
0	1	0	0	0	0	0	0	0	1	0	0	0	1	0
0	1	0	0	0	0	0	0	0	1	0	0	0	0	1
0	1	0	0	0	0	0	0	0	1	0	0	0	0	0
0	1	0	0	0	0	0	0	0	1	0	0	0	0	1
0	0	0	1	0	0	0	0	0	0	0	0	0	1	0
0	0	0	1	0	0	0	0	0	0	0	0	0	0	0
0	0	0	1	0	0	0	0	0	0	0	0	0	0	0
0	0	0	1	0	0	0	0	0	0	0	0	0	0	0
0	1	0	0	0	0	0	0	1	0	0	0	0	1	1
0	1	0	0	0	0	0	0	1	0	0	0	0	0	1
0	1	0	0	0	0	0	0	1	0	0	0	0	0	0
0	1	0	0	0	0	0	0	1	0	0	0	0	0	0
0	0	0	1	0	0	0	0	0	0	0	1	0	0	0
0	0	0	1	0	0	0	0	0	0	0	1	0	0	0
0	0	0	1	0	0	0	0	0	0	0	1	0	1	0
0	0	0	1	0	0	0	0	0	0	0	1	0	0	0
0	0	0	1	0	0	0	0	0	0	0	1	0	0	0
0	0	0	1	0	0	0	0	0	0	0	1	0	0	0
0	0	0	1	0	0	0	0	0	0	0	1	0	0	0
0	1	0	0	0	0	0	0	0	0	0	0	0	1	0
0	1	0	0	0	0	0	0	0	0	0	0	0	0	0
0	1	0	0	0	0	0	0	0	0	0	0	0	0	0
0	1	0	0	0	0	0	0	0	0	0	0	0	0	0
0	0	1	0	0	0	0	0	0	0	0	0	0	0	0
0	0	1	0	0	0	0	0	0	0	0	0	0	0	0
0	0	1	0	0	0	0	0	0	0	0	0	0	1	0
0	0	1	0	0	0	0	0	0	0	0	0	0	0	0
0	0	1	0	0	0	0	0	0	0	0	0	0	0	0
0	0	1	0	0	0	0	0	0	0	0	0	0	0	0
0	0	1	0	0	0	0	0	0	0	0	0	0	0	0
0	0	1	0	0	0	0	0	0	0	0	0	0	1	0
0	0	1	0	0	0	0	0	0	0	0	0	0	0	0
0	0	1	0	0	0	0	0	0	0	0	0	0	0	0
0	0	1	0	0	0	0	0	0	0	0	0	0	0	0
0	0	0	0	0	0	1	0	0	0	0	0	0	1	0
0	0	0	0	0	0	1	0	0	0	0	0	0	0	1
0	0	0	0	0	0	1	0	0	0	0	0	0	0	1
0	0	0	0	0	0	1	0	0	0	0	0	0	0	0
0	0	0	0	0	0	0	1	0	0	0	0	0	1	0
0	0	0	0	0	0	0	1	0	0	0	0	0	0	0
0	0	0	0	0	0	0	1	0	0	0	0	0	0	0
0	1	0	0	0	0	0	0	1	0	0	0	0	0	0
0	1	0	0	0	0	0	0	1	0	0	0	0	0	0
0	1	0	0	0	0	0	0	1	0	0	0	0	1	1
0	1	0	0	0	0	0	0	1	0	0	0	0	0	0
0	1	0	0	0	0	0	0	1	0	0	0	0	0	0
0	1	0	0	0	0	0	0	1	0	0	0	0	0	0
0	1	0	0	0	0	0	0	1	0	0	0	0	0	0
0	0	0	1	0	0	0	0	0	0	1	0	0	0	1
0	0	0	1	0	0	0	0	0	0	1	0	0	0	0
0	0	0	1	0	0	0	0	0	0	1	0	0	1	1
1	0	0	0	0	1	0	0	0	0	0	1	0	0	0
1	0	0	0	0	1	0	0	0	0	0	1	0	0	0
0	0	0	0	0	1	0	0	0	0	0	1	0	0	1
0	0	0	0	0	1	0	0	0	0	0	1	0	1	1
0	0	0	1	0	0	0	0	0	0	0	1	0	0	0
0	0	0	1	0	0	0	0	0	0	0	1	0	0	1
0	0	0	1	0	0	0	0	0	0	0	1	0	1	0
1	0	0	0	1	0	0	0	1	0	0	0	0	0	0
1	0	0	0	1	0	0	0	1	0	0	0	0	0	1
0	0	0	0	1	0	0	0	1	0	0	0	0	0	0
0	0	0	0	1	0	0	0	1	0	0	0	0	1	0
1	0	0	1	0	0	0	0	0	0	0	0	0	0	0
1	0	0	1	0	0	0	0	0	0	0	0	0	0	0
0	0	0	1	0	0	0	0	0	0	0	0	0	0	0
0	0	0	1	0	0	0	0	0	0	0	0	0	1	0
0	0	0	0	0	0	0	1	0	0	0	0	0	0	0
0	0	0	0	0	0	0	1	0	0	0	0	0	1	0
0	1	0	0	0	0	0	0	0	0	0	0	0	0	1
0	1	0	0	0	0	0	0	0	0	0	0	0	0	0
0	1	0	0	0	0	0	0	0	0	0	0	0	1	1
0	0	1	0	0	0	0	0	0	0	0	1	0	0	0
0	0	1	0	0	0	0	0	0	0	0	1	0	0	1
0	0	1	0	0	0	0	0	0	0	0	1	0	1	0
0	0	1	0	0	0	0	0	0	1	0	0	0	0	1
0	0	1	0	0	0	0	0	0	1	0	0	0	1	1
0	0	0	1	0	0	0	0	0	0	0	1	0	0	0
0	0	0	1	0	0	0	0	0	0	0	1	0	0	0
0	0	0	1	0	0	0	0	0	0	0	1	0	1	0
1	0	0	0	0	1	0	0	1	0	0	0	0	0	0
1	0	0	0	0	1	0	0	1	0	0	0	0	0	0
0	0	0	0	0	1	0	0	1	0	0	0	0	0	1
0	0	0	0	0	1	0	0	1	0	0	0	0	1	0
1	0	0	1	0	0	0	0	0	0	0	0	0	0	0
1	0	0	1	0	0	0	0	0	0	0	0	0	0	0
0	0	0	1	0	0	0	0	0	0	0	0	0	0	1
0	0	0	1	0	0	0	0	0	0	0	0	0	1	1
0	0	0	0	0	0	1	0	0	0	0	0	0	0	0
0	0	0	0	0	0	1	0	0	0	0	0	0	1	0
1	0	0	0	0	0	0	1	0	0	0	0	0	0	0
1	0	0	0	0	0	0	1	0	0	0	0	0	0	0
0	0	0	0	0	0	0	1	0	0	0	0	0	0	0
0	0	0	0	0	0	0	1	0	0	0	0	0	1	0
1	0	0	0	1	0	0	0	0	0	0	0	0	0	0
1	0	0	0	1	0	0	0	0	0	0	0	0	0	0
0	0	0	0	1	0	0	0	0	0	0	0	0	0	0
0	0	0	0	1	0	0	0	0	0	0	0	0	1	0
1	0	0	0	0	0	0	1	1	0	0	0	0	0	0
1	0	0	0	0	0	0	1	1	0	0	0	0	0	0
0	0	0	0	0	0	0	1	1	0	0	0	0	0	0
0	0	0	0	0	0	0	1	1	0	0	0	0	1	0
0	0	1	0	0	0	0	0	0	0	0	1	0	0	1
0	0	1	0	0	0	0	0	0	0	0	1	0	0	0
0	0	1	0	0	0	0	0	0	0	0	1	0	1	0
0	0	1	0	0	0	0	0	0	0	0	0	0	0	0
0	0	1	0	0	0	0	0	0	0	0	0	0	0	0
0	0	1	0	0	0	0	0	0	0	0	0	0	1	0
0	0	1	0	0	0	0	0	0	0	1	0	0	0	1
0	0	1	0	0	0	0	0	0	0	1	0	0	1	1
1	0	0	0	1	0	0	0	1	0	0	0	0	0	0
1	0	0	0	1	0	0	0	1	0	0	0	0	0	0
0	0	0	0	1	0	0	0	1	0	0	0	0	0	1
0	0	0	0	1	0	0	0	1	0	0	0	0	1	0
0	0	0	0	0	0	0	0	0	0	0	0	0	0	0
0	0	0	0	0	0	0	0	0	0	0	0	0	0	0
0	0	0	0	0	0	0	0	0	0	0	0	0	1	0
1	0	0	0	0	0	1	0	0	0	0	1	0	0	0
1	0	0	0	0	0	1	0	0	0	0	1	0	0	0
0	0	0	0	0	0	1	0	0	0	0	1	0	0	1
0	0	0	0	0	0	1	0	0	0	0	1	0	1	1
0	0	1	0	0	0	0	0	0	0	0	1	0	0	1
0	0	1	0	0	0	0	0	0	0	0	1	0	1	1
1	0	0	0	0	0	0	1	0	1	0	0	0	0	0
1	0	0	0	0	0	0	1	0	1	0	0	0	0	0
0	0	0	0	0	0	0	1	0	1	0	0	0	0	1
0	0	0	0	0	0	0	1	0	1	0	0	0	1	1
1	0	0	1	0	0	0	0	0	0	0	0	0	0	1
1	0	0	1	0	0	0	0	0	0	0	0	0	0	0
0	0	0	1	0	0	0	0	0	0	0	0	0	0	1
0	0	0	1	0	0	0	0	0	0	0	0	0	1	1
0	0	1	0	0	0	0	0	0	1	0	0	0	0	0
0	0	1	0	0	0	0	0	0	1	0	0	0	1	1
1	0	0	0	0	1	0	0	0	0	0	0	0	0	0
1	0	0	0	0	1	0	0	0	0	0	0	0	0	0
0	0	0	0	0	1	0	0	0	0	0	0	0	0	0
0	0	0	0	0	1	0	0	0	0	0	0	0	1	0
0	0	0	0	1	0	0	0	0	0	0	0	0	0	0
0	0	0	0	1	0	0	0	0	0	0	0	0	0	0
0	0	0	0	1	0	0	0	0	0	0	0	0	1	0
1	0	1	0	0	0	0	0	0	0	0	0	0	0	0
1	0	1	0	0	0	0	0	0	0	0	0	0	0	0
0	0	0	0	0	0	0	0	0	0	0	0	0	0	1
0	0	0	0	0	0	0	0	0	0	0	0	0	0	0
0	0	0	0	0	0	0	0	0	0	0	0	0	1	0
0	0	1	0	0	0	0	0	0	0	0	1	0	0	0
0	0	1	0	0	0	0	0	0	0	0	1	0	1	0
1	0	0	0	1	0	0	0	0	0	0	0	1	0	1
1	0	0	0	1	0	0	0	0	0	0	0	1	0	1
0	0	0	0	1	0	0	0	0	0	0	0	1	0	1
0	0	0	0	1	0	0	0	0	0	0	0	1	1	1
0	0	0	0	0	0	0	1	0	0	0	0	0	0	0
0	0	0	0	0	0	0	1	0	0	0	0	0	0	0
0	0	0	0	0	0	0	1	0	0	0	0	0	1	0
0	0	0	0	0	0	0	1	0	0	0	0	0	0	0
0	0	0	0	0	0	0	1	0	0	0	0	0	0	0
0	0	0	0	0	0	0	1	0	0	0	0	0	1	0
0	0	0	0	1	0	0	0	0	0	0	0	0	0	0
0	0	0	0	1	0	0	0	0	0	0	0	0	1	0
0	0	0	0	0	0	0	1	0	0	0	1	0	0	1
0	0	0	0	0	0	0	1	0	0	0	1	0	0	1
0	0	0	0	0	0	0	1	0	0	0	1	0	1	1
0	0	0	1	0	0	0	0	0	0	0	0	0	0	0
0	0	0	1	0	0	0	0	0	0	0	0	0	1	0
0	1	0	0	0	0	0	0	0	0	0	1	0	0	1
0	1	0	0	0	0	0	0	0	0	0	1	0	0	1
0	1	0	0	0	0	0	0	0	0	0	1	0	1	0
0	1	0	0	0	0	0	0	0	1	0	0	0	0	0
0	1	0	0	0	0	0	0	0	1	0	0	0	0	1
0	1	0	0	0	0	0	0	0	1	0	0	0	1	1
0	0	1	0	0	0	0	0	0	0	1	0	1	0	0
0	0	1	0	0	0	0	0	0	0	1	0	1	1	0
0	0	0	0	1	0	0	0	1	0	0	0	0	0	0
0	0	0	0	1	0	0	0	1	0	0	0	0	0	1
0	0	0	0	1	0	0	0	1	0	0	0	0	1	0
0	1	0	0	0	0	0	0	0	0	0	1	0	0	1
0	1	0	0	0	0	0	0	0	0	0	1	0	1	1
0	0	0	1	0	0	0	0	0	0	0	1	0	0	0
0	0	0	1	0	0	0	0	0	0	0	1	0	0	1
0	0	0	1	0	0	0	0	0	0	0	1	0	1	0
0	0	0	0	0	0	0	1	0	0	0	1	0	0	0
0	0	0	0	0	0	0	1	0	0	0	1	0	1	0
1	0	1	0	0	0	0	0	1	0	0	0	0	0	1
1	0	1	0	0	0	0	0	1	0	0	0	0	0	1
0	0	1	0	0	0	0	0	1	0	0	0	0	0	1
0	0	1	0	0	0	0	0	1	0	0	0	0	1	0
0	0	1	0	0	0	0	0	0	0	0	0	0	0	0
0	0	1	0	0	0	0	0	0	0	0	0	0	0	0
0	0	1	0	0	0	0	0	0	0	0	0	0	1	0
0	0	1	0	0	0	0	0	0	0	0	0	1	0	1
0	0	1	0	0	0	0	0	0	0	0	0	1	1	1
1	0	0	1	0	0	0	0	0	0	0	0	1	0	0
1	0	0	1	0	0	0	0	0	0	0	0	1	0	0
0	0	0	1	0	0	0	0	0	0	0	0	1	0	0
0	0	0	1	0	0	0	0	0	0	0	0	1	1	0
1	0	0	0	1	0	0	0	0	0	0	1	0	0	0
1	0	0	0	1	0	0	0	0	0	0	1	0	0	0
0	0	0	0	1	0	0	0	0	0	0	1	0	0	0
0	0	0	0	1	0	0	0	0	0	0	1	0	1	0
0	0	1	0	0	0	0	0	1	0	0	0	0	0	1
0	0	1	0	0	0	0	0	1	0	0	0	0	0	1
0	0	1	0	0	0	0	0	1	0	0	0	0	1	1
0	1	0	0	0	0	0	0	0	0	0	1	0	0	1
0	1	0	0	0	0	0	0	0	0	0	1	0	1	1
0	0	0	1	0	0	0	0	1	0	0	0	0	0	1
0	0	0	1	0	0	0	0	1	0	0	0	0	1	1
0	1	0	0	0	0	0	0	0	1	0	0	0	0	1
0	1	0	0	0	0	0	0	0	1	0	0	0	1	1
1	0	0	0	0	0	0	1	0	0	0	1	0	0	0
1	0	0	0	0	0	0	1	0	0	0	1	0	0	0
0	0	0	0	0	0	0	1	0	0	0	1	0	0	0
0	0	0	0	0	0	0	1	0	0	0	1	0	1	0
1	0	0	0	0	1	0	0	0	0	0	0	0	0	0
1	0	0	0	0	1	0	0	0	0	0	0	0	0	1
0	0	0	0	0	1	0	0	0	0	0	0	0	0	0
0	0	0	0	0	1	0	0	0	0	0	0	0	1	0
0	0	0	1	0	0	0	0	0	1	0	0	0	0	1
0	0	0	1	0	0	0	0	0	1	0	0	0	1	1
0	0	0	0	0	0	1	0	0	0	0	0	0	0	1
0	0	0	0	0	0	1	0	0	0	0	0	0	0	0
0	0	0	0	0	0	1	0	0	0	0	0	0	1	0
0	0	0	0	0	0	1	0	1	0	0	0	0	0	0
0	0	0	0	0	0	1	0	1	0	0	0	0	0	1
0	0	0	0	0	0	1	0	1	0	0	0	0	1	1
1	0	0	1	0	0	0	0	1	0	0	0	0	0	0
1	0	0	1	0	0	0	0	1	0	0	0	0	0	0
0	0	0	1	0	0	0	0	1	0	0	0	0	0	1
0	0	0	1	0	0	0	0	1	0	0	0	0	1	0
0	0	0	0	0	0	0	1	0	0	0	0	0	0	0
0	0	0	0	0	0	0	1	0	0	0	0	0	1	0
1	0	0	0	0	0	0	1	0	0	0	0	0	0	0
1	0	0	0	0	0	0	1	0	0	0	0	0	0	0
0	0	0	0	0	0	0	1	0	0	0	0	0	0	0
0	0	0	0	0	0	0	1	0	0	0	0	0	1	0
1	0	0	0	1	0	0	0	0	0	0	1	0	0	0
1	0	0	0	1	0	0	0	0	0	0	1	0	0	0
0	0	0	0	1	0	0	0	0	0	0	1	0	0	1
0	0	0	0	1	0	0	0	0	0	0	1	0	1	0
0	1	0	0	0	0	0	0	0	0	0	0	0	0	0
0	1	0	0	0	0	0	0	0	0	0	0	0	1	0
0	0	1	0	0	0	0	0	1	0	0	0	1	0	1
0	0	1	0	0	0	0	0	1	0	0	0	1	0	1
0	0	1	0	0	0	0	0	1	0	0	0	1	1	1
1	0	0	0	0	1	0	0	0	0	0	1	0	0	0
1	0	0	0	0	1	0	0	0	0	0	1	0	0	0
0	0	0	0	0	1	0	0	0	0	0	1	0	0	1
0	0	0	0	0	1	0	0	0	0	0	1	0	1	1
0	0	1	0	0	0	0	0	0	0	0	0	0	0	0
0	0	1	0	0	0	0	0	0	0	0	0	0	0	0
0	0	1	0	0	0	0	0	0	0	0	0	0	1	0
1	0	0	0	0	0	0	1	0	0	0	1	0	0	0
1	0	0	0	0	0	0	1	0	0	0	1	0	0	0
0	0	0	0	0	0	0	1	0	0	0	1	0	0	0
0	0	0	0	0	0	0	1	0	0	0	1	0	1	0
0	0	0	0	0	0	0	1	0	0	0	0	0	0	0
0	0	0	0	0	0	0	1	0	0	0	0	0	1	0
0	0	1	0	0	0	0	0	0	1	0	0	1	0	1
0	0	1	0	0	0	0	0	0	1	0	0	1	0	1
0	0	1	0	0	0	0	0	0	1	0	0	1	1	1
1	0	0	0	0	1	0	0	0	0	0	0	0	0	0
1	0	0	0	0	1	0	0	0	0	0	0	0	0	0
0	0	0	0	0	1	0	0	0	0	0	0	0	0	0
0	0	0	0	0	1	0	0	0	0	0	0	0	1	0
1	0	0	0	0	0	0	1	0	0	0	0	0	0	0
1	0	0	0	0	0	0	1	0	0	0	0	0	0	0
0	0	0	0	0	0	0	1	0	0	0	0	0	0	0
0	0	0	0	0	0	0	1	0	0	0	0	0	1	0
0	0	0	0	0	0	0	1	0	0	0	1	0	0	0
0	0	0	0	0	0	0	1	0	0	0	1	0	1	0
1	0	0	0	0	0	1	0	0	0	0	1	0	0	0
1	0	0	0	0	0	1	0	0	0	0	1	0	0	0
0	0	0	0	0	0	1	0	0	0	0	1	0	0	1
0	0	0	0	0	0	1	0	0	0	0	1	0	1	1
1	1	0	0	0	0	0	0	1	0	0	0	0	0	1
1	1	0	0	0	0	0	0	1	0	0	0	0	0	1
0	1	0	0	0	0	0	0	1	0	0	0	0	0	0
0	1	0	0	0	0	0	0	1	0	0	0	0	1	0
0	0	0	0	1	0	0	0	0	0	0	0	0	0	0
0	0	0	0	1	0	0	0	0	0	0	0	0	0	0
0	0	0	0	1	0	0	0	0	0	0	0	0	1	0
1	1	0	0	0	0	0	0	0	0	0	0	0	0	0
1	1	0	0	0	0	0	0	0	0	0	0	0	0	0
0	1	0	0	0	0	0	0	0	0	0	0	0	0	0
0	1	0	0	0	0	0	0	0	0	0	0	0	1	0
0	1	0	0	0	0	0	0	1	0	0	0	0	0	1
0	1	0	0	0	0	0	0	1	0	0	0	0	0	1
0	1	0	0	0	0	0	0	1	0	0	0	0	1	0
0	0	0	0	0	1	0	0	0	0	0	0	0	0	1
0	0	0	0	0	1	0	0	0	0	0	0	0	1	0
0	0	1	0	0	0	0	0	0	1	0	0	0	0	1
0	0	1	0	0	0	0	0	0	1	0	0	0	1	0
0	0	0	1	0	0	0	0	1	0	0	0	0	0	1
0	0	0	1	0	0	0	0	1	0	0	0	0	0	0
0	0	0	1	0	0	0	0	1	0	0	0	0	1	0
0	0	0	1	0	0	0	0	0	0	0	1	0	0	1
0	0	0	1	0	0	0	0	0	0	0	1	0	0	1
0	0	0	1	0	0	0	0	0	0	0	1	0	1	0
1	0	0	0	0	1	0	0	0	0	0	1	0	0	0
1	0	0	0	0	1	0	0	0	0	0	1	0	0	0
0	0	0	0	0	1	0	0	0	0	0	1	0	0	1
0	0	0	0	0	1	0	0	0	0	0	1	0	1	0
0	0	0	0	0	0	0	1	1	0	0	0	0	0	0
0	0	0	0	0	0	0	1	1	0	0	0	0	0	0
0	0	0	0	0	0	0	1	1	0	0	0	0	1	0
1	0	0	0	1	0	0	0	0	0	0	0	0	0	0
1	0	0	0	1	0	0	0	0	0	0	0	0	0	0
0	0	0	0	1	0	0	0	0	0	0	0	0	0	1
0	0	0	0	1	0	0	0	0	0	0	0	0	1	0
0	0	0	1	0	0	0	0	0	0	0	1	0	0	0
0	0	0	1	0	0	0	0	0	0	0	1	0	0	0
0	0	0	1	0	0	0	0	0	0	0	1	0	0	0
0	0	0	1	0	0	0	0	0	0	0	1	0	0	1
0	0	0	1	0	0	0	0	0	0	0	1	0	1	1
0	0	0	1	0	0	0	0	0	0	0	1	0	0	0
0	0	1	0	0	0	0	0	0	0	0	0	0	0	0
1	0	1	0	0	0	0	0	0	0	0	0	0	0	1
0	0	1	0	0	0	0	0	0	0	0	0	0	0	0
0	0	1	0	0	0	0	0	0	0	0	0	0	1	0
0	0	1	0	0	0	0	0	0	0	0	0	0	0	0
0	0	1	0	0	0	0	0	0	1	0	0	0	0	1
0	0	1	0	0	0	0	0	0	1	0	0	0	0	1
0	0	1	0	0	0	0	0	0	1	0	0	0	1	1
0	0	1	0	0	0	0	0	0	1	0	0	0	0	1
0	0	1	0	0	0	0	0	0	0	0	1	0	0	0
0	0	1	0	0	0	0	0	0	0	0	1	0	0	0
0	0	1	0	0	0	0	0	0	0	0	1	0	0	1
0	0	1	0	0	0	0	0	0	0	0	1	0	0	1
0	0	1	0	0	0	0	0	0	0	0	1	0	1	0
0	0	1	0	0	0	0	0	0	0	0	1	0	0	0
0	0	0	0	1	0	0	0	0	0	0	0	0	0	0
0	0	0	0	1	0	0	0	0	0	0	0	0	0	0
0	0	0	0	1	0	0	0	0	0	0	0	0	1	0
0	0	0	0	1	0	0	0	0	0	0	0	0	0	0
0	0	0	1	0	0	0	0	0	0	0	0	0	0	0
1	0	0	1	0	0	0	0	0	0	0	0	0	0	1
0	0	0	1	0	0	0	0	0	0	0	0	0	0	0
0	0	0	1	0	0	0	0	0	0	0	0	0	1	0
0	0	0	1	0	0	0	0	0	0	0	0	0	0	0
0	0	0	0	0	0	1	0	0	0	0	1	0	0	0
1	0	0	0	0	0	1	0	0	0	0	1	0	0	1
0	0	0	0	0	0	1	0	0	0	0	1	0	0	0
0	0	0	0	0	0	1	0	0	0	0	1	0	1	0
0	0	0	0	0	0	1	0	0	0	0	1	0	0	0
0	0	0	0	0	0	0	0	0	0	0	1	0	0	0
0	0	0	0	0	0	0	0	0	0	0	1	0	0	0
0	0	0	0	0	0	0	0	0	0	0	1	0	1	0
0	0	0	0	0	0	0	0	0	0	0	1	0	0	0
0	1	0	0	0	0	0	0	1	0	0	0	0	0	0
0	1	0	0	0	0	0	0	1	0	0	0	0	0	0
0	1	0	0	0	0	0	0	1	0	0	0	0	1	1
0	1	0	0	0	0	0	0	1	0	0	0	0	0	1
0	0	0	1	0	0	0	0	0	0	0	0	0	0	1
1	0	0	1	0	0	0	0	0	0	0	0	0	0	1
0	0	0	1	0	0	0	0	0	0	0	0	0	0	0
0	0	0	1	0	0	0	0	0	0	0	0	0	1	0
0	0	0	1	0	0	0	0	0	0	0	0	0	0	0
0	0	1	0	0	0	0	0	1	0	0	0	0	0	0
1	0	1	0	0	0	0	0	1	0	0	0	0	0	0
0	0	1	0	0	0	0	0	1	0	0	0	0	0	1
0	0	1	0	0	0	0	0	1	0	0	0	0	1	1
0	0	1	0	0	0	0	0	1	0	0	0	0	0	1
0	0	1	0	0	0	0	0	0	0	0	1	0	0	1
1	0	1	0	0	0	0	0	0	0	0	1	0	0	1
0	0	1	0	0	0	0	0	0	0	0	1	0	0	1
0	0	1	0	0	0	0	0	0	0	0	1	0	1	1
0	0	1	0	0	0	0	0	0	0	0	1	0	0	1
0	1	0	0	0	0	0	0	0	0	0	1	0	0	1
0	1	0	0	0	0	0	0	0	0	0	1	0	0	1
1	1	0	0	0	0	0	0	0	0	0	1	0	0	0
0	1	0	0	0	0	0	0	0	0	0	1	0	0	1
0	1	0	0	0	0	0	0	0	0	0	1	0	0	1
0	1	0	0	0	0	0	0	0	0	0	1	0	1	0
0	1	0	0	0	0	0	0	0	0	0	1	0	0	1
0	0	0	1	0	0	0	0	0	0	0	0	0	0	0
0	0	0	1	0	0	0	0	0	0	0	0	0	0	0
0	0	0	1	0	0	0	0	0	0	0	0	0	1	0
0	0	0	1	0	0	0	0	0	0	0	0	0	0	0
0	1	0	0	0	0	0	0	1	0	0	0	0	0	1
0	1	0	0	0	0	0	0	1	0	0	0	0	0	1
0	1	0	0	0	0	0	0	1	0	0	0	0	1	0
0	1	0	0	0	0	0	0	1	0	0	0	0	0	1
0	0	1	0	0	0	0	0	0	0	0	0	0	0	0
0	0	1	0	0	0	0	0	0	0	0	0	0	0	0
0	0	1	0	0	0	0	0	0	0	0	0	0	0	0
0	0	1	0	0	0	0	0	0	0	0	0	0	0	0
0	0	1	0	0	0	0	0	0	0	0	0	0	1	0
0	0	1	0	0	0	0	0	0	0	0	0	0	0	0
0	0	0	0	0	0	0	1	1	0	0	0	0	0	0
0	0	0	0	0	0	0	1	1	0	0	0	0	0	1
0	0	0	0	0	0	0	1	1	0	0	0	0	0	1
0	0	0	0	0	0	0	1	1	0	0	0	0	0	0
0	0	0	0	0	0	0	1	1	0	0	0	0	1	1
0	0	0	0	0	0	0	1	1	0	0	0	0	0	1
0	0	1	0	0	0	0	0	1	0	0	0	0	0	0
0	0	1	0	0	0	0	0	1	0	0	0	0	0	0
0	0	1	0	0	0	0	0	1	0	0	0	0	1	0
0	0	1	0	0	0	0	0	1	0	0	0	0	0	0
0	0	1	0	0	0	0	0	0	0	0	1	0	0	1
0	0	1	0	0	0	0	0	0	0	0	1	0	0	1
0	0	1	0	0	0	0	0	0	0	0	1	0	0	1
0	0	1	0	0	0	0	0	0	0	0	1	0	0	1
0	0	1	0	0	0	0	0	0	0	0	1	0	1	0
0	0	1	0	0	0	0	0	0	0	0	1	0	0	0
0	0	0	0	0	0	0	0	0	0	0	0	1	0	1
0	0	0	0	0	0	0	0	0	0	0	0	1	0	1
0	0	0	0	0	0	0	0	0	0	0	0	1	1	0
0	0	0	0	0	0	0	0	0	0	0	0	1	0	0
0	0	0	0	0	0	1	0	0	0	0	0	0	0	0
0	0	0	0	0	0	1	0	0	0	0	0	0	0	0
0	0	0	0	0	0	1	0	0	0	0	0	0	1	0
0	0	0	0	0	0	1	0	0	0	0	0	0	0	0
0	0	0	0	0	0	0	1	0	0	0	0	0	0	0
0	0	0	0	0	0	0	1	0	0	0	0	0	0	0
0	0	0	0	0	0	0	1	0	0	0	0	0	1	0
0	0	0	0	0	0	0	1	0	0	0	0	0	0	0
0	0	0	0	0	0	0	0	0	0	0	0	0	0	1
0	0	0	0	0	0	0	0	0	0	0	0	0	0	1
0	0	0	0	0	0	0	0	0	0	0	0	0	1	1
0	0	0	0	0	0	0	0	0	0	0	0	0	0	1
0	1	0	0	0	0	0	0	0	1	0	0	0	0	1
0	1	0	0	0	0	0	0	0	1	0	0	0	0	1
0	1	0	0	0	0	0	0	0	1	0	0	0	1	1
0	1	0	0	0	0	0	0	0	1	0	0	0	0	1
0	0	0	0	0	0	0	1	0	0	0	0	0	0	0
0	0	0	0	0	0	0	1	0	0	0	0	0	0	0
0	0	0	0	0	0	0	1	0	0	0	0	0	1	0
0	0	0	0	0	0	0	1	0	0	0	0	0	0	0
0	0	0	0	1	0	0	0	0	0	0	0	0	0	1
0	0	0	0	1	0	0	0	0	0	0	0	0	0	1
0	0	0	0	1	0	0	0	0	0	0	0	0	1	1
0	0	0	0	1	0	0	0	0	0	0	0	0	0	1
0	0	0	0	0	0	0	1	0	0	0	1	0	0	0
0	0	0	0	0	0	0	1	0	0	0	1	0	0	1
0	0	0	0	0	0	0	1	0	0	0	1	0	0	0
0	0	0	0	0	0	0	1	0	0	0	1	0	1	0
0	0	0	0	0	0	0	1	0	0	0	1	0	0	0
0	0	0	1	0	0	0	0	0	0	0	0	0	0	0
1	0	0	1	0	0	0	0	0	0	0	0	0	0	0
0	0	0	1	0	0	0	0	0	0	0	0	0	0	0
0	0	0	1	0	0	0	0	0	0	0	0	0	1	0
0	0	0	1	0	0	0	0	0	0	0	0	0	0	0
0	0	0	0	1	0	0	0	0	0	0	1	0	0	0
0	0	0	0	1	0	0	0	0	0	0	1	0	0	0
0	0	0	0	1	0	0	0	0	0	0	1	0	1	0
0	0	0	0	1	0	0	0	0	0	0	1	0	0	0
0	0	0	1	0	0	0	0	0	0	0	0	0	0	1
0	0	0	1	0	0	0	0	0	0	0	0	0	0	0
0	0	0	1	0	0	0	0	0	0	0	0	0	0	1
0	0	0	1	0	0	0	0	0	0	0	0	0	0	0
0	0	0	1	0	0	0	0	0	0	0	0	0	1	1
0	0	0	1	0	0	0	0	0	0	0	0	0	0	1
0	0	0	0	0	0	0	0	0	0	0	1	0	0	1
0	0	0	0	0	0	0	0	0	0	0	1	0	0	1
0	0	0	0	0	0	0	0	0	0	0	1	0	0	1
0	0	0	0	0	0	0	0	0	0	0	1	0	0	1
0	0	0	0	0	0	0	0	0	0	0	1	0	1	1
0	0	0	0	0	0	0	0	0	0	0	1	0	0	1
0	0	0	1	0	0	0	0	0	0	0	1	0	0	1
1	0	0	1	0	0	0	0	0	0	0	1	0	0	1
0	0	0	1	0	0	0	0	0	0	0	1	0	0	1
0	0	0	1	0	0	0	0	0	0	0	1	0	1	0
0	0	0	1	0	0	0	0	0	0	0	1	0	0	1
0	0	0	1	0	0	0	0	0	0	0	0	0	0	0
1	0	0	1	0	0	0	0	0	0	0	0	0	0	0
0	0	0	1	0	0	0	0	0	0	0	0	0	0	0
0	0	0	1	0	0	0	0	0	0	0	0	0	1	0
0	0	0	1	0	0	0	0	0	0	0	0	0	0	0
0	1	0	0	0	0	0	0	0	0	0	1	0	0	0
0	1	0	0	0	0	0	0	0	0	0	1	0	0	1
0	1	0	0	0	0	0	0	0	0	0	1	0	0	0
0	1	0	0	0	0	0	0	0	0	0	1	0	0	1
0	1	0	0	0	0	0	0	0	0	0	1	0	1	0
0	1	0	0	0	0	0	0	0	0	0	1	0	0	0
0	0	0	0	0	0	1	0	0	1	0	0	0	0	1
0	0	0	0	0	0	1	0	0	1	0	0	0	0	1
0	0	0	0	0	0	1	0	0	1	0	0	0	1	1
0	0	0	0	0	0	1	0	0	1	0	0	0	0	1
0	1	0	0	0	0	0	0	0	0	0	0	0	0	0
0	1	0	0	0	0	0	0	0	0	0	0	0	0	0
0	1	0	0	0	0	0	0	0	0	0	0	0	1	0
0	1	0	0	0	0	0	0	0	0	0	0	0	0	0
0	0	0	0	0	1	0	0	0	0	0	1	0	0	1
0	0	0	0	0	1	0	0	0	0	0	1	0	0	0
0	0	0	0	0	1	0	0	0	0	0	1	0	0	1
0	0	0	0	0	1	0	0	0	0	0	1	0	0	0
0	0	0	0	0	1	0	0	0	0	0	1	0	1	1
0	0	0	0	0	1	0	0	0	0	0	1	0	0	0
0	0	0	0	0	0	1	0	0	0	0	0	0	0	1
0	0	0	0	0	0	1	0	0	0	0	0	0	0	0
0	0	0	0	0	0	1	0	0	0	0	0	0	1	0
0	0	0	0	0	0	1	0	0	0	0	0	0	0	0
0	0	1	0	0	0	0	0	0	0	0	0	0	0	0
0	0	1	0	0	0	0	0	0	0	0	0	0	0	0
0	0	1	0	0	0	0	0	0	0	0	0	0	1	0
0	0	1	0	0	0	0	0	0	0	0	0	0	0	0
0	0	0	0	0	0	0	1	0	0	0	0	0	0	0
1	0	0	0	0	0	0	1	0	0	0	0	0	0	1
0	0	0	0	0	0	0	1	0	0	0	0	0	0	0
0	0	0	0	0	0	0	1	0	0	0	0	0	1	0
0	0	0	0	0	0	0	1	0	0	0	0	0	0	0
0	0	0	1	0	0	0	0	0	1	0	0	0	0	1
0	0	0	1	0	0	0	0	0	1	0	0	0	0	1
0	0	0	1	0	0	0	0	0	1	0	0	0	1	1
0	0	0	1	0	0	0	0	0	1	0	0	0	0	1
0	0	0	0	0	0	1	0	0	0	0	0	0	0	0
0	0	0	0	0	0	1	0	0	0	0	0	0	0	0
0	0	0	0	0	0	1	0	0	0	0	0	0	0	0
0	0	0	0	0	0	1	0	0	0	0	0	0	0	0
0	0	0	0	0	0	1	0	0	0	0	0	0	1	0
0	0	0	0	0	0	1	0	0	0	0	0	0	0	0
0	1	0	0	0	0	0	0	0	1	0	0	0	0	1
0	1	0	0	0	0	0	0	0	1	0	0	0	0	1
0	1	0	0	0	0	0	0	0	1	0	0	0	0	0
0	1	0	0	0	0	0	0	0	1	0	0	0	0	0
0	1	0	0	0	0	0	0	0	1	0	0	0	1	1
0	1	0	0	0	0	0	0	0	1	0	0	0	0	1
0	0	0	0	0	0	0	1	1	0	0	0	0	0	1
0	0	0	0	0	0	0	1	1	0	0	0	0	0	1
0	0	0	0	0	0	0	1	1	0	0	0	0	0	1
0	0	0	0	0	0	0	1	1	0	0	0	0	0	0
0	0	0	0	0	0	0	1	1	0	0	0	0	1	0
0	0	0	0	0	0	0	1	1	0	0	0	0	0	1
0	0	0	0	1	0	0	0	0	0	0	1	0	0	1
0	0	0	0	1	0	0	0	0	0	0	1	0	0	1
0	0	0	0	1	0	0	0	0	0	0	1	0	1	1
0	0	0	0	1	0	0	0	0	0	0	1	0	0	1
0	0	0	0	1	0	0	0	0	0	0	1	0	0	1
0	0	0	0	1	0	0	0	0	0	0	1	0	0	0
0	0	0	0	1	0	0	0	0	0	0	1	0	1	0
0	0	0	0	1	0	0	0	0	0	0	1	0	0	1
0	1	0	0	0	0	0	0	0	0	0	0	0	0	0
0	1	0	0	0	0	0	0	0	0	0	0	0	0	0
0	1	0	0	0	0	0	0	0	0	0	0	0	0	0
0	1	0	0	0	0	0	0	0	0	0	0	0	0	0
0	1	0	0	0	0	0	0	0	0	0	0	0	1	0
0	1	0	0	0	0	0	0	0	0	0	0	0	0	0
0	1	0	0	0	0	0	0	0	0	0	1	1	0	0
0	1	0	0	0	0	0	0	0	0	0	1	1	0	0
0	1	0	0	0	0	0	0	0	0	0	1	1	1	0
0	1	0	0	0	0	0	0	0	0	0	1	1	0	0
0	0	0	1	0	0	0	0	0	0	0	0	0	0	1
0	0	0	1	0	0	0	0	0	0	0	0	0	0	1
0	0	0	1	0	0	0	0	0	0	0	0	0	1	0
0	0	0	1	0	0	0	0	0	0	0	0	0	0	0
0	1	0	0	0	0	0	0	0	0	0	0	0	0	0
0	1	0	0	0	0	0	0	0	0	0	0	0	0	0
0	1	0	0	0	0	0	0	0	0	0	0	0	0	0
0	1	0	0	0	0	0	0	0	0	0	0	0	0	0
0	1	0	0	0	0	0	0	0	0	0	0	0	1	0
0	1	0	0	0	0	0	0	0	0	0	0	0	0	0
0	0	0	0	1	0	0	0	0	0	0	0	0	0	0
0	0	0	0	1	0	0	0	0	0	0	0	0	0	0
0	0	0	0	1	0	0	0	0	0	0	0	0	1	0
0	0	0	0	1	0	0	0	0	0	0	0	0	0	0
0	0	1	0	0	0	0	0	0	1	0	0	0	0	1
0	0	1	0	0	0	0	0	0	1	0	0	0	0	1
0	0	1	0	0	0	0	0	0	1	0	0	0	1	1
0	0	1	0	0	0	0	0	0	1	0	0	0	0	1
0	0	1	0	0	0	0	0	0	0	0	1	0	0	0
0	0	1	0	0	0	0	0	0	0	0	1	0	0	0
0	0	1	0	0	0	0	0	0	0	0	1	0	0	0
0	0	1	0	0	0	0	0	0	0	0	1	0	0	0
0	0	1	0	0	0	0	0	0	0	0	1	0	1	0
0	0	1	0	0	0	0	0	0	0	0	1	0	0	0
0	0	0	0	0	0	0	1	0	0	0	0	0	0	0
0	0	0	0	0	0	0	1	0	0	0	0	0	0	0
0	0	0	0	0	0	0	1	0	0	0	0	0	1	1
0	0	0	0	0	0	0	1	0	0	0	0	0	0	0
0	0	0	1	0	0	0	0	0	0	0	0	0	0	0
0	0	0	1	0	0	0	0	0	0	0	0	0	0	0
0	0	0	1	0	0	0	0	0	0	0	0	0	1	0
0	0	0	1	0	0	0	0	0	0	0	0	0	0	0
0	0	0	0	1	0	0	0	1	0	0	0	0	0	1
1	0	0	0	1	0	0	0	1	0	0	0	0	0	1
0	0	0	0	1	0	0	0	1	0	0	0	0	0	1
0	0	0	0	1	0	0	0	1	0	0	0	0	1	1
0	0	0	0	1	0	0	0	1	0	0	0	0	0	1
0	0	1	0	0	0	0	0	0	0	0	0	0	0	0
0	0	1	0	0	0	0	0	0	0	0	0	0	0	0
0	0	1	0	0	0	0	0	0	0	0	0	0	0	0
0	0	1	0	0	0	0	0	0	0	0	0	0	0	0
0	0	1	0	0	0	0	0	0	0	0	0	0	1	0
0	0	1	0	0	0	0	0	0	0	0	0	0	0	0
0	0	0	1	0	0	0	0	0	0	0	1	0	0	1
0	0	0	1	0	0	0	0	0	0	0	1	0	0	1
0	0	0	1	0	0	0	0	0	0	0	1	0	0	1
0	0	0	1	0	0	0	0	0	0	0	1	0	0	1
0	0	0	1	0	0	0	0	0	0	0	1	0	1	1
0	0	0	1	0	0	0	0	0	0	0	1	0	0	1
0	0	0	0	1	0	0	0	0	0	0	0	0	0	0
1	0	0	0	1	0	0	0	0	0	0	0	0	0	1
0	0	0	0	1	0	0	0	0	0	0	0	0	0	0
0	0	0	0	1	0	0	0	0	0	0	0	0	1	0
0	0	0	0	1	0	0	0	0	0	0	0	0	0	0
0	0	0	0	0	0	0	1	0	0	0	0	0	0	1
0	0	0	0	0	0	0	1	0	0	0	0	0	0	1
0	0	0	0	0	0	0	1	0	0	0	0	0	1	1
0	0	0	0	0	0	0	1	0	0	0	0	0	0	1
0	0	0	1	0	0	0	0	0	0	0	1	0	0	0
0	0	0	1	0	0	0	0	0	0	0	1	0	0	1
0	0	0	1	0	0	0	0	0	0	0	1	0	0	0
0	0	0	1	0	0	0	0	0	0	0	1	0	0	0
0	0	0	1	0	0	0	0	0	0	0	1	0	1	0
0	0	0	1	0	0	0	0	0	0	0	1	0	0	0
0	0	0	0	0	0	0	0	0	0	0	0	0	0	0
0	0	0	0	0	0	0	0	0	0	0	0	0	0	0
0	0	0	0	0	0	0	0	0	0	0	0	0	0	0
0	0	0	0	0	0	0	0	0	0	0	0	0	0	0
0	0	0	0	0	0	0	0	0	0	0	0	0	1	0
0	0	0	0	0	0	0	0	0	0	0	0	0	0	0
0	0	0	1	0	0	0	0	0	0	0	0	0	0	0
1	0	0	1	0	0	0	0	0	0	0	0	0	0	0
0	0	0	1	0	0	0	0	0	0	0	0	0	0	0
0	0	0	1	0	0	0	0	0	0	0	0	0	1	0
0	0	0	1	0	0	0	0	0	0	0	0	0	0	0
0	0	0	0	0	0	0	1	0	0	0	0	0	0	0
0	0	0	0	0	0	0	1	0	0	0	0	0	0	0
0	0	0	0	0	0	0	1	0	0	0	0	0	1	0
0	0	0	0	0	0	0	1	0	0	0	0	0	0	0
0	0	0	1	0	0	0	0	0	0	0	0	0	0	0
1	0	0	1	0	0	0	0	0	0	0	0	0	0	0
0	0	0	1	0	0	0	0	0	0	0	0	0	0	0
0	0	0	1	0	0	0	0	0	0	0	0	0	1	1
0	0	0	1	0	0	0	0	0	0	0	0	0	0	0
0	1	0	0	0	0	0	0	0	0	0	0	0	0	0
1	1	0	0	0	0	0	0	0	0	0	0	0	0	0
0	1	0	0	0	0	0	0	0	0	0	0	0	0	0
0	1	0	0	0	0	0	0	0	0	0	0	0	1	0
0	1	0	0	0	0	0	0	0	0	0	0	0	0	0
0	1	0	0	0	0	0	0	1	0	0	0	0	0	0
0	1	0	0	0	0	0	0	1	0	0	0	0	0	1
0	1	0	0	0	0	0	0	1	0	0	0	0	1	1
0	1	0	0	0	0	0	0	1	0	0	0	0	0	1
0	0	1	0	0	0	0	0	1	0	0	0	0	0	0
0	0	1	0	0	0	0	0	1	0	0	0	0	0	0
0	0	1	0	0	0	0	0	1	0	0	0	0	0	0
0	0	1	0	0	0	0	0	1	0	0	0	0	0	0
0	0	1	0	0	0	0	0	1	0	0	0	0	1	0
0	0	1	0	0	0	0	0	1	0	0	0	0	0	0
0	0	1	0	0	0	0	0	0	0	0	1	0	0	0
0	0	1	0	0	0	0	0	0	0	0	1	0	0	0
0	0	1	0	0	0	0	0	0	0	0	1	0	0	0
0	0	1	0	0	0	0	0	0	0	0	1	0	0	0
0	0	1	0	0	0	0	0	0	0	0	1	0	1	0
0	0	1	0	0	0	0	0	0	0	0	1	0	0	0
0	1	0	0	0	0	0	0	1	0	0	0	1	0	1
0	1	0	0	0	0	0	0	1	0	0	0	1	0	1
0	1	0	0	0	0	0	0	1	0	0	0	1	1	1
0	1	0	0	0	0	0	0	1	0	0	0	1	0	1
0	0	0	0	1	0	0	0	0	0	0	0	0	0	0
1	0	0	0	1	0	0	0	0	0	0	0	0	0	0
0	0	0	0	1	0	0	0	0	0	0	0	0	0	0
0	0	0	0	1	0	0	0	0	0	0	0	0	1	0
0	0	0	0	1	0	0	0	0	0	0	0	0	0	0
0	0	0	1	0	0	0	0	1	0	0	0	0	0	0
0	0	0	1	0	0	0	0	1	0	0	0	0	0	1
0	0	0	1	0	0	0	0	1	0	0	0	0	1	0
0	0	0	1	0	0	0	0	1	0	0	0	0	0	1
0	0	0	0	0	0	0	0	1	0	0	0	0	0	0
0	0	0	0	0	0	0	0	1	0	0	0	0	0	0
0	0	0	0	0	0	0	0	1	0	0	0	0	1	0
0	0	0	0	0	0	0	0	1	0	0	0	0	0	0
0	0	0	0	0	0	0	1	0	0	0	0	0	0	0
1	0	0	0	0	0	0	1	0	0	0	0	0	0	0
0	0	0	0	0	0	0	1	0	0	0	0	0	0	0
0	0	0	0	0	0	0	1	0	0	0	0	0	1	0
0	0	0	0	0	0	0	1	0	0	0	0	0	0	0
0	0	0	0	0	0	0	1	0	0	0	0	0	0	0
0	0	0	0	0	0	0	1	0	0	0	0	0	0	0
0	0	0	0	0	0	0	1	0	0	0	0	0	1	0
0	0	0	0	0	0	0	1	0	0	0	0	0	0	0
0	0	1	0	0	0	0	0	0	1	0	0	1	0	1
0	0	1	0	0	0	0	0	0	1	0	0	1	0	1
0	0	1	0	0	0	0	0	0	1	0	0	1	1	1
0	0	1	0	0	0	0	0	0	1	0	0	1	0	0
0	0	0	1	0	0	0	0	0	0	0	1	0	0	0
1	0	0	1	0	0	0	0	0	0	0	1	0	0	1
0	0	0	1	0	0	0	0	0	0	0	1	0	0	0
0	0	0	1	0	0	0	0	0	0	0	1	0	1	0
0	0	0	1	0	0	0	0	0	0	0	1	0	0	0
1	0	1	0	0	0	0	0	0	0	0	0	0	0	0
0	0	0	1	0	0	0	0	0	0	0	1	1	0	0
0	0	0	1	0	0	0	0	0	0	0	1	1	0	0
0	0	0	1	0	0	0	0	0	0	0	1	1	1	0
0	0	0	1	0	0	0	0	0	0	0	1	1	0	0
0	1	0	0	0	0	0	0	0	0	0	0	0	0	0
0	1	0	0	0	0	0	0	0	0	0	0	0	0	0
0	1	0	0	0	0	0	0	0	0	0	0	0	1	0
0	1	0	0	0	0	0	0	0	0	0	0	0	0	0
0	1	0	0	0	0	0	0	0	0	0	1	0	0	0
0	1	0	0	0	0	0	0	0	0	0	1	0	0	1
0	1	0	0	0	0	0	0	0	0	0	1	0	0	0
0	1	0	0	0	0	0	0	0	0	0	1	0	0	0
0	1	0	0	0	0	0	0	0	0	0	1	0	1	0
0	1	0	0	0	0	0	0	0	0	0	1	0	0	0
0	0	1	0	0	0	0	0	0	0	0	0	0	0	0
1	0	1	0	0	0	0	0	0	0	0	0	0	0	0
0	0	1	0	0	0	0	0	0	0	0	0	0	0	0
0	0	1	0	0	0	0	0	0	0	0	0	0	1	0
0	0	1	0	0	0	0	0	0	0	0	0	0	0	0
0	0	0	0	0	1	0	0	0	0	0	1	0	0	0
1	0	0	0	0	1	0	0	0	0	0	1	0	0	1
0	0	0	0	0	1	0	0	0	0	0	1	0	0	1
0	0	0	0	0	1	0	0	0	0	0	1	0	1	0
0	0	0	0	0	1	0	0	0	0	0	1	0	0	1
0	1	0	0	0	0	0	0	0	0	0	0	0	0	0
0	1	0	0	0	0	0	0	0	0	0	0	0	0	0
0	1	0	0	0	0	0	0	0	0	0	0	0	1	0
0	1	0	0	0	0	0	0	0	0	0	0	0	0	0
0	0	0	0	0	1	0	0	0	0	0	1	1	0	0
0	0	0	0	0	1	0	0	0	0	0	1	1	0	0
0	0	0	1	0	0	0	0	0	0	0	1	0	0	0
0	0	0	1	0	0	0	0	0	0	0	1	0	0	0
0	0	0	1	0	0	0	0	0	0	0	1	0	0	1
0	0	0	1	0	0	0	0	0	0	0	1	0	0	1
0	0	0	1	0	0	0	0	0	0	0	1	0	1	0
0	0	0	1	0	0	0	0	0	0	0	1	0	0	0
0	0	0	1	0	0	0	0	0	0	0	0	0	0	1
0	0	0	1	0	0	0	0	0	0	0	0	0	0	1
0	0	0	1	0	0	0	0	0	0	0	0	0	0	1
0	0	0	1	0	0	0	0	0	0	0	0	0	0	0
0	0	0	1	0	0	0	0	0	0	1	0	1	0	0
0	0	0	1	0	0	0	0	0	0	1	0	1	0	0
0	0	0	1	0	0	0	0	0	0	1	0	1	0	0
0	0	0	1	0	0	0	0	0	0	1	0	1	0	0
0	0	1	0	0	0	0	0	0	0	0	0	0	0	0
0	1	0	0	0	0	0	0	1	0	0	0	0	0	1
0	1	0	0	0	0	0	0	1	0	0	0	0	0	1
0	1	0	0	0	0	0	0	1	0	0	0	0	0	1
0	1	0	0	0	0	0	0	1	0	0	0	0	0	1
1	0	0	0	0	1	0	0	1	0	0	0	1	0	1
0	0	0	0	0	1	0	0	1	0	0	0	1	0	1
0	0	0	0	0	1	0	0	1	0	0	0	1	0	1
0	0	0	0	0	1	0	0	1	0	0	0	1	0	1
0	0	0	0	0	1	0	0	1	0	0	0	1	0	1
0	0	0	0	0	1	0	0	1	0	0	0	1	0	1
0	0	0	0	0	1	0	0	1	0	0	0	1	0	0
0	0	0	0	0	0	0	0	0	0	0	0	0	0	0
0	0	0	0	0	0	0	0	0	0	0	0	0	0	0
0	0	0	0	0	0	0	0	0	0	0	0	0	0	0
0	0	0	0	0	0	0	0	0	0	0	0	0	0	0
0	0	0	0	0	0	0	0	0	0	0	0	0	0	0
0	1	0	0	0	0	0	0	1	0	0	0	0	0	1
0	1	0	0	0	0	0	0	1	0	0	0	0	0	1
0	1	0	0	0	0	0	0	1	0	0	0	0	0	0
0	1	0	0	0	0	0	0	1	0	0	0	0	0	1
0	1	0	0	0	0	0	0	1	0	0	0	0	0	1
1	0	0	1	0	0	0	0	1	0	0	0	0	0	0
0	0	0	1	0	0	0	0	1	0	0	0	0	0	1
0	0	0	1	0	0	0	0	1	0	0	0	0	0	1
0	0	0	1	0	0	0	0	1	0	0	0	0	0	0
0	0	0	1	0	0	0	0	1	0	0	0	0	0	0
0	0	0	1	0	0	0	0	1	0	0	0	0	0	1
1	0	0	1	0	0	0	0	0	0	0	0	0	0	0
0	0	0	1	0	0	0	0	0	0	0	0	0	0	0
0	0	0	1	0	0	0	0	0	0	0	0	0	0	0
0	0	0	1	0	0	0	0	0	0	0	0	0	0	0
0	0	0	1	0	0	0	0	0	0	0	0	0	0	0
0	0	0	1	0	0	0	0	0	0	0	0	0	0	0
0	1	0	0	0	0	0	0	0	0	0	1	0	0	1
0	1	0	0	0	0	0	0	0	0	0	1	0	0	1
0	1	0	0	0	0	0	0	0	0	0	1	0	0	1
0	1	0	0	0	0	0	0	0	0	0	1	0	0	1
0	0	0	0	1	0	0	0	0	0	0	1	0	0	1
0	0	0	0	1	0	0	0	0	0	0	1	0	0	1
0	0	0	0	1	0	0	0	0	0	0	1	0	0	0
0	0	0	0	1	0	0	0	0	0	0	1	0	0	0
0	0	1	0	0	0	0	0	1	0	0	0	0	0	1
0	0	1	0	0	0	0	0	1	0	0	0	0	0	1
0	0	1	0	0	0	0	0	1	0	0	0	0	0	1
0	0	1	0	0	0	0	0	1	0	0	0	0	0	1
0	0	0	0	0	0	1	0	1	0	0	0	1	0	0
0	0	0	0	0	0	1	0	1	0	0	0	1	0	0
0	0	0	0	0	0	1	0	1	0	0	0	1	0	1
0	0	0	0	0	0	1	0	1	0	0	0	1	0	1
1	0	0	0	1	0	0	0	0	0	0	0	0	0	0
0	0	0	0	1	0	0	0	0	0	0	0	0	0	0
0	0	0	0	1	0	0	0	0	0	0	0	0	0	0
0	0	0	0	1	0	0	0	0	0	0	0	0	0	0
0	0	0	0	1	0	0	0	0	0	0	0	0	0	0
0	0	0	0	1	0	0	0	0	0	0	0	0	0	0
0	0	0	0	0	0	0	1	1	0	0	0	1	0	1
0	0	0	0	0	0	0	1	1	0	0	0	1	0	1
0	0	0	0	0	0	0	1	1	0	0	0	1	0	1
0	0	0	0	0	0	0	1	1	0	0	0	1	0	1
0	1	0	0	0	0	0	0	0	0	0	0	0	0	0
0	1	0	0	0	0	0	0	0	0	0	0	0	0	0
0	1	0	0	0	0	0	0	0	0	0	0	0	0	0
0	1	0	0	0	0	0	0	0	0	0	0	0	0	0
0	0	0	0	0	0	0	1	1	0	0	0	0	0	1
0	0	0	0	0	0	0	1	1	0	0	0	0	0	1
0	0	0	0	0	0	0	1	1	0	0	0	0	0	1
0	0	0	0	0	0	0	1	1	0	0	0	0	0	1
1	0	0	0	0	1	0	0	0	0	0	1	0	0	0
0	0	0	0	0	1	0	0	0	0	0	1	0	0	0
0	0	0	0	0	1	0	0	0	0	0	1	0	0	0
0	0	0	0	0	1	0	0	0	0	0	1	0	0	0
0	0	0	0	0	1	0	0	0	0	0	1	0	0	1
0	0	0	0	0	1	0	0	0	0	0	1	0	0	0
0	0	0	0	0	0	0	0	0	0	0	0	0	0	0
0	0	0	0	0	0	0	0	0	0	0	0	0	0	0
0	0	0	0	0	0	0	0	0	0	0	0	0	0	0
0	0	0	0	0	0	0	0	0	0	0	0	0	0	1
0	0	1	0	0	0	0	0	0	0	0	1	0	0	1
0	0	1	0	0	0	0	0	0	0	0	1	0	0	1
0	0	1	0	0	0	0	0	0	0	0	1	0	0	1
0	0	1	0	0	0	0	0	0	0	0	1	0	0	1
0	0	0	0	0	0	0	0	0	0	0	0	0	0	0
0	0	0	0	0	0	0	0	0	0	0	0	0	0	0
0	0	0	0	0	0	0	0	0	0	0	0	0	0	0
0	0	0	0	0	0	0	0	0	0	0	0	0	0	0
0	0	0	0	0	0	0	0	0	0	0	0	0	0	0
1	0	0	0	1	0	0	0	0	0	0	1	0	0	0
0	0	0	0	1	0	0	0	0	0	0	1	0	0	0
0	0	0	0	1	0	0	0	0	0	0	1	0	0	0
0	0	0	0	1	0	0	0	0	0	0	1	0	0	0
0	0	0	0	1	0	0	0	0	0	0	1	0	0	0
0	0	0	0	1	0	0	0	0	0	0	1	0	0	0
0	0	0	1	0	0	0	0	1	0	0	0	0	0	1
0	0	0	1	0	0	0	0	1	0	0	0	0	0	1
0	0	0	1	0	0	0	0	1	0	0	0	0	0	1
0	0	0	1	0	0	0	0	1	0	0	0	0	0	1
0	1	0	0	0	0	0	0	1	0	0	0	0	0	1
0	1	0	0	0	0	0	0	1	0	0	0	0	0	1
0	1	0	0	0	0	0	0	1	0	0	0	0	0	0
0	1	0	0	0	0	0	0	1	0	0	0	0	0	0
0	0	0	0	1	0	0	0	0	1	0	0	0	0	0
0	0	0	0	1	0	0	0	0	1	0	0	0	0	0
0	0	0	0	1	0	0	0	0	1	0	0	0	0	0
0	0	0	0	1	0	0	0	0	1	0	0	0	0	0
0	0	0	0	1	0	0	0	0	1	0	0	0	0	0
0	0	0	0	0	0	0	1	0	0	0	0	0	0	0
0	0	0	0	0	0	0	1	0	0	0	0	0	0	0
0	0	0	0	0	0	0	1	0	0	0	0	0	0	0
0	0	0	0	0	0	0	1	0	0	0	0	0	0	0
0	0	0	1	0	0	0	0	0	0	0	1	0	0	1
0	0	0	1	0	0	0	0	0	0	0	1	0	0	1
0	0	0	1	0	0	0	0	0	0	0	1	0	0	0
0	0	0	1	0	0	0	0	0	0	0	1	0	0	1
1	1	0	0	0	0	0	0	0	0	0	0	0	0	0
0	1	0	0	0	0	0	0	0	0	0	0	0	0	0
0	1	0	0	0	0	0	0	0	0	0	0	0	0	0
0	1	0	0	0	0	0	0	0	0	0	0	0	0	0
0	1	0	0	0	0	0	0	0	0	0	0	0	0	0
0	1	0	0	0	0	0	0	0	0	0	0	0	0	0
0	0	0	0	0	0	0	1	0	0	0	1	0	0	1
0	0	0	0	0	0	0	1	0	0	0	1	0	0	1
0	0	0	0	0	0	0	1	0	0	0	1	0	0	1
0	0	0	0	0	0	0	1	0	0	0	1	0	0	1
0	0	0	0	0	0	0	1	0	0	0	1	0	0	1
0	0	0	1	0	0	0	0	1	0	0	0	0	0	1
0	0	0	1	0	0	0	0	1	0	0	0	0	0	1
0	0	0	1	0	0	0	0	1	0	0	0	0	0	1
0	0	0	1	0	0	0	0	1	0	0	0	0	0	0
0	0	0	1	0	0	0	0	1	0	0	0	0	0	1
0	0	0	1	0	0	0	0	1	0	0	0	1	0	0
0	0	0	1	0	0	0	0	1	0	0	0	1	0	1
0	0	0	1	0	0	0	0	1	0	0	0	1	0	1
0	0	0	1	0	0	0	0	1	0	0	0	1	0	0
0	0	0	1	0	0	0	0	1	0	0	0	1	0	1
1	0	0	0	0	1	0	0	0	0	0	0	1	0	0
0	0	0	0	0	1	0	0	0	0	0	0	1	0	1
0	0	0	0	0	1	0	0	0	0	0	0	1	0	1
0	0	0	0	0	1	0	0	0	0	0	0	1	0	0
0	0	0	0	0	1	0	0	0	0	0	0	1	0	0
0	0	0	0	0	1	0	0	0	0	0	0	1	0	0
0	0	0	0	0	1	0	0	1	0	0	0	0	0	1
0	0	0	0	0	1	0	0	1	0	0	0	0	0	1
0	0	0	0	0	1	0	0	1	0	0	0	0	0	0
0	0	0	0	0	1	0	0	1	0	0	0	0	0	1
0	0	0	0	0	1	0	0	1	0	0	0	0	0	0
0	0	0	0	0	0	0	0	0	0	1	0	1	0	1
0	0	0	0	0	0	0	0	0	0	1	0	1	0	1
0	0	0	0	0	0	0	0	0	0	1	0	1	0	0
0	0	0	0	0	0	0	0	0	0	1	0	1	0	0
0	0	0	0	0	0	0	0	0	0	0	0	0	0	1
0	0	0	0	0	0	0	0	0	0	0	0	0	0	1
0	0	0	0	0	0	0	0	0	0	0	0	0	0	0
0	0	0	0	0	0	0	0	0	0	0	0	0	0	1
1	0	0	0	0	0	0	1	0	0	0	0	1	0	0
0	0	0	0	0	0	0	1	0	0	0	0	1	0	0
1	0	0	1	0	0	0	0	1	0	0	0	0	0	0
0	0	0	1	0	0	0	0	1	0	0	0	0	0	1
0	0	0	1	0	0	0	0	1	0	0	0	0	0	1
0	0	0	1	0	0	0	0	1	0	0	0	0	0	1
0	0	0	1	0	0	0	0	1	0	0	0	0	0	1
0	0	0	1	0	0	0	0	1	0	0	0	0	0	0
0	0	0	0	1	0	0	0	0	0	0	0	0	0	1
0	0	0	0	1	0	0	0	0	0	0	0	0	0	1
0	0	0	0	1	0	0	0	0	0	0	0	0	0	1
0	0	0	0	1	0	0	0	0	0	0	0	0	0	1
0	0	0	0	1	0	0	0	0	0	0	0	0	0	1
0	1	0	0	0	0	0	0	0	0	0	0	0	0	1
0	1	0	0	0	0	0	0	0	0	0	0	0	0	1
0	1	0	0	0	0	0	0	0	0	0	0	0	0	1
0	1	0	0	0	0	0	0	0	0	0	0	0	0	0
1	0	0	0	0	1	0	0	0	0	0	1	0	0	1
0	0	0	0	0	1	0	0	0	0	0	1	0	0	1
0	0	0	0	0	1	0	0	0	0	0	1	0	0	1
0	0	0	0	0	1	0	0	0	0	0	1	0	0	1
0	0	0	0	0	1	0	0	0	0	0	1	0	0	1
0	0	0	0	0	1	0	0	0	0	0	1	0	0	1
0	1	0	0	0	0	0	0	0	0	0	1	0	0	1
0	1	0	0	0	0	0	0	0	0	0	1	0	0	1
0	1	0	0	0	0	0	0	0	0	0	1	0	0	1
0	1	0	0	0	0	0	0	0	0	0	1	0	0	1
1	0	0	0	0	1	0	0	0	0	0	1	0	0	1
0	0	0	0	0	1	0	0	0	0	0	1	0	0	1
0	0	0	0	0	1	0	0	0	0	0	1	0	0	1
0	0	0	0	0	1	0	0	0	0	0	1	0	0	1
0	0	0	0	0	1	0	0	0	0	0	1	0	0	1
0	0	0	0	0	1	0	0	0	0	0	1	0	0	0
0	0	0	0	0	1	0	0	0	0	0	1	0	0	0
1	0	0	0	0	0	0	1	0	0	0	0	0	0	0
0	0	0	0	0	0	0	1	0	0	0	0	0	0	0
0	0	0	0	0	0	0	1	0	0	0	0	0	0	0
0	0	0	0	0	0	0	1	0	0	0	0	0	0	0
0	0	0	0	0	0	0	1	0	0	0	0	0	0	0
0	0	0	0	0	0	0	1	0	0	0	0	0	0	0
0	1	0	0	0	0	0	0	0	0	1	0	0	0	1
0	1	0	0	0	0	0	0	0	0	1	0	0	0	1
0	1	0	0	0	0	0	0	0	0	1	0	0	0	1
0	1	0	0	0	0	0	0	0	0	1	0	0	0	1
0	1	0	0	0	0	0	0	1	0	0	0	0	0	1
0	1	0	0	0	0	0	0	1	0	0	0	0	0	1
0	1	0	0	0	0	0	0	1	0	0	0	0	0	0
0	1	0	0	0	0	0	0	1	0	0	0	0	0	1
0	1	0	0	0	0	0	0	1	0	0	0	0	0	0
0	0	1	0	0	0	0	0	0	0	0	1	0	0	1
0	0	1	0	0	0	0	0	0	0	0	1	0	0	1
0	0	1	0	0	0	0	0	0	0	0	1	0	0	0
0	0	1	0	0	0	0	0	0	0	0	1	0	0	0
1	0	0	0	0	1	0	0	0	0	0	1	0	0	1
0	0	0	0	0	1	0	0	0	0	0	1	0	0	0
0	0	0	0	0	1	0	0	0	0	0	1	0	0	0
0	0	0	0	0	1	0	0	0	0	0	1	0	0	1
0	0	0	0	0	1	0	0	0	0	0	1	0	0	0
0	0	0	0	0	1	0	0	0	0	0	1	0	0	1
1	0	0	0	1	0	0	0	0	0	0	0	0	0	0
0	0	0	0	1	0	0	0	0	0	0	0	0	0	0
0	0	0	0	1	0	0	0	0	0	0	0	0	0	0
0	0	0	0	1	0	0	0	0	0	0	0	0	0	0
0	0	0	0	1	0	0	0	0	0	0	0	0	0	0
0	0	0	0	1	0	0	0	0	0	0	0	0	0	0
0	0	0	0	0	0	0	1	0	0	0	1	0	0	0
0	0	0	0	0	0	0	1	0	0	0	1	0	0	0
0	0	0	0	0	0	0	1	0	0	0	1	0	0	0
0	0	0	0	0	0	0	1	0	0	0	1	0	0	0
0	0	0	0	0	0	0	1	0	0	0	1	0	0	0
1	1	0	0	0	0	0	0	0	0	0	1	0	0	1
0	1	0	0	0	0	0	0	0	0	0	1	0	0	0
0	1	0	0	0	0	0	0	0	0	0	1	0	0	0
0	1	0	0	0	0	0	0	0	0	0	1	0	0	0
0	1	0	0	0	0	0	0	0	0	0	1	0	0	0
0	1	0	0	0	0	0	0	0	0	0	1	0	0	0
0	0	1	0	0	0	0	0	1	0	0	0	0	0	1
0	0	1	0	0	0	0	0	1	0	0	0	0	0	1
0	0	1	0	0	0	0	0	1	0	0	0	0	0	1
0	0	1	0	0	0	0	0	1	0	0	0	0	0	0
0	0	0	0	0	0	0	0	0	0	0	0	0	0	1
0	0	0	0	0	0	0	0	0	0	0	0	0	0	1
0	0	0	0	0	0	0	0	0	0	0	0	0	0	1
0	0	0	0	0	0	0	0	0	0	0	0	0	0	1
0	0	0	1	0	0	0	0	0	0	0	1	0	0	0
0	0	0	1	0	0	0	0	0	0	0	1	0	0	0
0	0	0	1	0	0	0	0	0	0	0	1	0	0	0
0	0	0	1	0	0	0	0	0	0	0	1	0	0	0
0	0	0	1	0	0	0	0	0	0	0	1	0	0	0
1	0	0	0	0	0	0	1	0	0	0	1	0	0	1
0	0	0	0	0	0	0	1	0	0	0	1	0	0	1
0	0	0	0	0	0	0	1	0	0	0	1	0	0	1
0	0	0	0	0	0	0	1	0	0	0	1	0	0	1
0	0	0	0	0	0	0	1	0	0	0	1	0	0	1
0	0	0	0	0	0	0	1	0	0	0	1	0	0	1
1	1	0	0	0	0	0	0	0	0	0	0	0	0	0
0	1	0	0	0	0	0	0	0	0	0	0	0	0	0
0	1	0	0	0	0	0	0	0	0	0	0	0	0	0
0	1	0	0	0	0	0	0	0	0	0	0	0	0	0
0	1	0	0	0	0	0	0	0	0	0	0	0	0	0
0	1	0	0	0	0	0	0	0	0	0	0	0	0	0
0	1	0	0	0	0	0	0	0	1	0	0	0	0	1
0	1	0	0	0	0	0	0	0	1	0	0	0	0	1
0	1	0	0	0	0	0	0	0	1	0	0	0	0	1
0	1	0	0	0	0	0	0	0	1	0	0	0	0	1
0	1	0	0	0	0	0	0	0	1	0	0	0	0	1
0	1	0	0	0	0	0	0	1	0	0	0	0	0	1
0	1	0	0	0	0	0	0	1	0	0	0	0	0	1
0	1	0	0	0	0	0	0	1	0	0	0	0	0	1
0	1	0	0	0	0	0	0	1	0	0	0	0	0	1
1	0	0	0	0	0	1	0	0	0	0	1	0	0	0
0	0	0	0	0	0	1	0	0	0	0	1	0	0	1
0	0	0	0	0	0	1	0	0	0	0	1	0	0	1
0	0	0	0	0	0	1	0	0	0	0	1	0	0	0
0	0	0	0	0	0	1	0	0	0	0	1	0	0	0
0	0	0	0	0	0	1	0	0	0	0	1	0	0	1
0	1	0	0	0	0	0	0	0	0	0	0	0	0	1
0	1	0	0	0	0	0	0	0	0	0	0	0	0	1
0	1	0	0	0	0	0	0	0	0	0	0	0	0	1
0	1	0	0	0	0	0	0	0	0	0	0	0	0	1
0	1	0	0	0	0	0	0	0	0	0	0	0	0	1
0	0	0	0	1	0	0	0	0	0	0	1	1	0	1
0	0	0	0	1	0	0	0	0	0	0	1	1	0	1
0	0	0	0	1	0	0	0	0	0	0	1	1	0	0
0	0	0	0	1	0	0	0	0	0	0	1	1	0	0
0	0	0	0	1	0	0	0	0	0	0	1	1	0	0
0	1	0	0	0	0	0	0	0	0	0	0	0	0	0
0	1	0	0	0	0	0	0	0	0	0	0	0	0	0
0	1	0	0	0	0	0	0	0	0	0	0	0	0	0
0	1	0	0	0	0	0	0	0	0	0	0	0	0	0
0	1	0	0	0	0	0	0	0	0	0	0	0	0	0
0	0	1	0	0	0	0	0	0	0	1	0	1	0	1
0	0	1	0	0	0	0	0	0	0	1	0	1	0	0
0	0	1	0	0	0	0	0	0	0	1	0	1	0	1
0	0	1	0	0	0	0	0	0	0	1	0	1	0	1
1	0	1	0	0	0	0	0	0	1	0	0	0	0	1
0	0	1	0	0	0	0	0	0	1	0	0	0	0	1
0	0	1	0	0	0	0	0	0	1	0	0	0	0	1
0	0	1	0	0	0	0	0	0	1	0	0	0	0	1
0	0	1	0	0	0	0	0	0	1	0	0	0	0	1
0	0	1	0	0	0	0	0	0	1	0	0	0	0	1
0	1	0	0	0	0	0	0	0	0	0	1	0	0	1
0	1	0	0	0	0	0	0	0	0	0	1	0	0	1
0	1	0	0	0	0	0	0	0	0	0	1	0	0	0
0	1	0	0	0	0	0	0	0	0	0	1	0	0	1
0	1	0	0	0	0	0	0	0	0	0	1	0	0	0
0	0	0	0	0	0	0	1	0	0	0	1	0	0	1
0	0	0	0	0	0	0	1	0	0	0	1	0	0	1
0	0	0	0	0	0	0	1	0	0	0	1	0	0	0
0	0	0	0	0	0	0	1	0	0	0	1	0	0	0
0	0	0	0	0	0	0	1	0	0	0	1	0	0	0
0	0	1	0	0	0	0	0	1	0	0	0	1	0	1
0	0	1	0	0	0	0	0	1	0	0	0	1	0	1
0	0	1	0	0	0	0	0	1	0	0	0	1	0	1
0	0	1	0	0	0	0	0	1	0	0	0	1	0	1
0	0	0	0	1	0	0	0	0	0	0	1	0	0	0
0	0	0	0	1	0	0	0	0	0	0	1	0	0	0
0	0	0	0	1	0	0	0	0	0	0	1	0	0	0
0	0	0	0	1	0	0	0	0	0	0	1	0	0	0
0	0	0	0	1	0	0	0	0	0	0	1	0	0	0
1	0	0	1	0	0	0	0	0	0	0	0	0	0	0
0	0	0	1	0	0	0	0	0	0	0	0	0	0	0
0	0	0	1	0	0	0	0	0	0	0	0	0	0	0
0	0	0	1	0	0	0	0	0	0	0	0	0	0	0
0	0	0	1	0	0	0	0	0	0	0	0	0	0	0
0	0	0	1	0	0	0	0	0	0	0	0	0	0	0
0	0	0	1	0	0	0	0	0	0	0	1	0	0	0
0	0	0	1	0	0	0	0	0	0	0	1	0	0	0
0	0	0	1	0	0	0	0	0	0	0	1	0	0	0
0	0	0	1	0	0	0	0	0	0	0	1	0	0	0
0	0	1	0	0	0	0	0	1	0	0	0	0	0	1
0	0	1	0	0	0	0	0	1	0	0	0	0	0	1
0	0	1	0	0	0	0	0	1	0	0	0	0	0	1
0	0	1	0	0	0	0	0	1	0	0	0	0	0	1
1	0	0	1	0	0	0	0	1	0	0	0	1	0	0
0	0	0	1	0	0	0	0	1	0	0	0	1	0	1
0	0	0	1	0	0	0	0	1	0	0	0	1	0	1
0	0	0	1	0	0	0	0	1	0	0	0	1	0	0
0	0	0	1	0	0	0	0	1	0	0	0	1	0	1
0	0	0	1	0	0	0	0	1	0	0	0	1	0	1
1	0	0	0	0	0	0	1	0	0	0	0	0	0	1
0	0	0	0	0	0	0	1	0	0	0	0	0	0	0
0	0	0	0	0	0	0	1	0	0	0	0	0	0	0
0	0	0	0	0	0	0	1	0	0	0	0	0	0	0
0	0	0	0	0	0	0	1	0	0	0	0	0	0	0
0	0	0	0	0	0	0	1	0	0	0	0	0	0	0
0	0	0	0	0	1	0	0	0	0	0	0	1	0	0
0	0	0	0	0	1	0	0	0	0	0	0	1	0	1
0	0	0	0	0	1	0	0	0	0	0	0	1	0	0
0	0	0	0	0	1	0	0	0	0	0	0	1	0	0
0	0	1	0	0	0	0	0	1	0	0	0	0	0	1
0	0	1	0	0	0	0	0	1	0	0	0	0	0	1
0	0	1	0	0	0	0	0	1	0	0	0	0	0	1
0	0	1	0	0	0	0	0	1	0	0	0	0	0	1
0	0	1	0	0	0	0	0	1	0	0	0	0	0	0
0	0	1	0	0	0	0	0	0	0	0	0	0	0	0
0	0	1	0	0	0	0	0	0	0	0	0	0	0	0
0	0	1	0	0	0	0	0	0	0	0	0	0	0	0
0	0	1	0	0	0	0	0	0	0	0	0	0	0	0
0	0	1	0	0	0	0	0	0	0	0	0	0	0	0
0	1	0	0	0	0	0	0	1	0	0	0	0	0	1
0	1	0	0	0	0	0	0	1	0	0	0	0	0	1
0	1	0	0	0	0	0	0	1	0	0	0	0	0	0
0	1	0	0	0	0	0	0	1	0	0	0	0	0	0
0	0	1	0	0	0	0	0	0	0	0	0	0	0	0
0	0	1	0	0	0	0	0	0	0	0	0	0	0	0
0	0	1	0	0	0	0	0	0	0	0	0	0	0	0
0	0	1	0	0	0	0	0	0	0	0	0	0	0	0
0	0	1	0	0	0	0	0	0	0	0	0	0	0	0
0	1	0	0	0	0	0	0	0	0	0	0	0	0	1
0	1	0	0	0	0	0	0	0	0	0	0	0	0	1
0	1	0	0	0	0	0	0	0	0	0	0	0	0	1
0	1	0	0	0	0	0	0	0	0	0	0	0	0	0
0	0	0	0	0	0	0	1	0	0	0	0	0	0	1
0	0	0	0	0	0	0	1	0	0	0	0	0	0	0
0	0	0	0	0	0	0	1	0	0	0	0	0	0	0
0	0	0	0	0	0	0	1	0	0	0	0	0	0	0
0	1	0	0	0	0	0	0	0	0	0	0	0	0	0
0	1	0	0	0	0	0	0	0	0	0	0	0	0	0
0	1	0	0	0	0	0	0	0	0	0	0	0	0	0
0	1	0	0	0	0	0	0	0	0	0	0	0	0	0
0	1	0	0	0	0	0	0	0	0	0	0	0	0	0
1	0	1	0	0	0	0	0	0	0	0	0	0	0	0
0	0	1	0	0	0	0	0	0	0	0	0	0	0	0
1	0	0	1	0	0	0	0	0	0	0	1	0	0	0
0	0	0	1	0	0	0	0	0	0	0	1	0	0	0
0	0	0	1	0	0	0	0	0	0	0	1	0	0	1
0	0	0	1	0	0	0	0	0	0	0	1	0	0	0
0	0	0	1	0	0	0	0	0	0	0	1	0	0	1
0	0	0	1	0	0	0	0	0	0	0	1	0	0	0
0	0	1	0	0	0	0	0	0	0	0	0	0	0	0
0	0	1	0	0	0	0	0	0	0	0	0	0	0	0
0	0	1	0	0	0	0	0	0	0	0	0	0	0	0
0	0	1	0	0	0	0	0	0	0	0	0	0	0	0
0	0	1	0	0	0	0	0	0	0	0	0	0	0	0
