# Supplementary material
Source: ML conference proceedings conference paper supplement (https://proceedings.neurips.cc/paper_files/paper/2022/hash/5afaa8b4dd18eb1eed055d2d821b58ae-Abstract.html)
Supplement: Supplementary file 1 [file 5afaa8b4dd18eb1eed055d2d821b58ae-Supplemental-Conference.zip › 6769_exploring_the_whole_rashomon_s-Supplementary Material/6769_code_repo/experiments/datasets/coupon/Bar.csv]

Bar_1~3	Bar_4~8	Bar_less1	maritalStatus_Single	Childrennumber_0	Bar_gt8	passanger_Friend(s)	time_6PM	passanger_Kid(s)	CarryAway_4~8	gender_Female	education_Graduate degree (Masters Doctorate etc.)	Restaurant20To50_4~8	expiration_1d	temperature_55	target
0	0	0	1	1	0	1	0	0	1	0	0	0	1	0	1
0	0	0	1	1	0	0	1	0	1	0	0	0	1	1	1
0	0	0	1	1	0	0	0	0	1	0	0	0	1	1	1
0	0	0	1	1	0	1	0	0	0	0	0	0	1	0	0
0	0	0	1	1	0	0	1	0	0	0	0	0	1	1	0
0	0	0	1	1	0	0	0	0	0	0	0	0	1	1	0
0	0	1	0	0	0	0	0	1	0	0	0	0	1	0	1
0	0	1	0	0	0	0	1	0	0	0	0	0	1	1	1
0	0	1	0	0	0	0	0	0	0	0	0	0	1	1	1
1	0	0	1	1	0	1	0	0	0	0	0	0	1	0	1
1	0	0	1	1	0	0	1	0	0	0	0	0	1	1	1
1	0	0	1	1	0	0	0	0	0	0	0	0	1	1	0
1	0	0	0	1	0	1	0	0	1	0	0	0	1	0	1
1	0	0	0	1	0	0	1	0	1	0	0	0	1	1	1
1	0	0	0	1	0	0	0	0	1	0	0	0	1	1	1
0	0	0	0	0	0	0	0	1	0	1	0	0	1	0	0
0	0	0	0	0	0	0	1	0	0	1	0	0	1	1	0
0	0	0	0	0	0	0	0	0	0	1	0	0	1	1	0
0	0	0	1	1	1	1	0	0	0	0	0	0	1	0	1
0	0	0	1	1	1	0	1	0	0	0	0	0	1	1	1
0	0	0	1	1	1	0	0	0	0	0	0	0	1	1	1
0	0	0	1	0	0	1	0	0	1	1	0	0	1	0	0
0	0	0	1	0	0	0	0	0	1	1	0	0	1	1	1
0	0	1	1	1	0	1	0	0	0	0	0	0	1	0	0
0	0	1	1	1	0	0	1	0	0	0	0	0	1	1	1
0	0	1	1	1	0	0	0	0	0	0	0	0	1	1	0
1	0	0	0	1	0	0	0	0	0	1	0	0	0	0	0
1	0	0	0	1	0	0	1	0	0	1	0	0	1	0	1
1	0	0	0	1	0	0	1	0	0	1	0	0	1	1	1
1	0	0	0	1	0	0	0	0	0	1	0	0	1	1	1
1	0	0	1	1	0	1	0	0	1	1	0	0	1	0	1
1	0	0	1	1	0	0	1	0	1	1	0	0	1	1	1
1	0	0	1	1	0	0	0	0	1	1	0	0	1	1	0
0	0	0	0	0	0	0	0	1	0	1	1	0	1	0	0
0	0	0	0	0	0	0	1	0	0	1	1	0	1	1	1
0	0	0	0	0	0	0	0	0	0	1	1	0	1	1	0
0	0	0	0	0	0	0	0	1	0	1	0	0	1	0	0
0	0	0	0	0	0	0	1	0	0	1	0	0	1	1	0
0	0	0	0	0	0	0	0	0	0	1	0	0	1	1	0
0	0	0	0	0	0	0	0	1	0	0	1	0	1	0	0
0	0	0	0	0	0	0	1	0	0	0	1	0	1	1	0
0	0	0	0	0	0	0	0	0	0	0	1	0	1	1	0
0	0	0	0	1	0	0	0	0	0	1	0	0	0	0	0
0	0	0	0	1	0	0	1	0	0	1	0	0	1	1	1
0	0	0	0	1	0	0	0	0	0	1	0	0	1	1	1
0	0	1	0	0	0	0	0	1	1	0	1	1	1	0	0
0	0	1	0	0	0	0	1	0	1	0	1	1	1	1	1
0	0	1	0	0	0	0	0	0	1	0	1	1	1	1	0
0	0	0	0	0	0	0	0	1	1	1	0	0	1	0	0
0	0	0	0	0	0	0	1	0	1	1	0	0	1	1	0
0	0	0	0	0	0	0	0	0	1	1	0	0	1	1	0
1	0	0	1	1	0	1	0	0	0	1	0	1	1	0	1
1	0	0	1	1	0	0	1	0	0	1	0	1	1	1	1
1	0	0	1	1	0	0	0	0	0	1	0	1	1	1	1
0	0	0	0	1	0	0	0	0	0	0	0	0	0	0	0
0	0	0	0	1	0	0	1	0	0	0	0	0	1	0	0
0	0	0	0	1	0	0	1	0	0	0	0	0	1	1	1
0	0	0	0	1	0	0	0	0	0	0	0	0	1	1	1
0	0	0	1	1	0	1	0	0	0	0	0	0	1	0	1
0	0	0	1	1	0	0	1	0	0	0	0	0	1	1	0
0	0	0	1	1	0	0	0	0	0	0	0	0	1	1	1
0	0	0	1	0	1	1	0	0	0	0	0	0	1	0	0
0	0	0	1	0	1	0	1	0	0	0	0	0	1	1	1
0	0	0	1	1	0	1	0	0	1	0	0	0	1	0	0
0	0	0	1	1	0	0	1	0	1	0	0	0	1	1	0
0	0	0	1	1	0	0	0	0	1	0	0	0	1	1	0
1	0	0	0	0	0	0	0	1	1	0	1	0	1	0	1
1	0	0	0	0	0	0	1	0	1	0	1	0	1	1	1
1	0	0	0	0	0	0	0	0	1	0	1	0	1	1	1
0	0	0	1	1	0	1	0	0	0	1	0	0	1	0	0
0	0	0	1	1	0	0	1	0	0	1	0	0	1	1	0
0	0	0	1	1	0	0	0	0	0	1	0	0	1	1	0
0	1	0	1	1	0	1	0	0	0	0	0	0	1	0	1
0	1	0	1	1	0	0	1	0	0	0	0	0	1	1	1
0	1	0	1	1	0	0	0	0	0	0	0	0	1	1	1
0	1	0	1	1	0	1	0	0	1	0	0	0	1	0	1
0	1	0	1	1	0	0	1	0	1	0	0	0	1	1	1
0	1	0	1	1	0	0	0	0	1	0	0	0	1	1	0
0	0	0	0	0	0	0	0	1	0	1	0	0	1	0	0
0	0	0	0	0	0	0	1	0	0	1	0	0	1	1	0
0	0	0	0	0	0	0	0	0	0	1	0	0	1	1	0
0	0	1	1	0	0	1	0	0	0	1	0	0	1	0	1
0	0	1	1	0	0	0	1	0	0	1	0	0	1	1	1
0	0	1	1	0	0	0	0	0	0	1	0	0	1	1	1
1	0	0	0	1	0	0	0	0	1	0	0	0	0	0	1
1	0	0	0	1	0	0	1	0	1	0	0	0	1	0	1
1	0	0	0	1	0	0	1	0	1	0	0	0	1	1	1
1	0	0	0	1	0	0	0	0	1	0	0	0	1	1	1
0	0	1	0	0	0	0	0	1	1	0	0	0	1	0	0
0	0	1	0	0	0	0	1	0	1	0	0	0	1	1	1
0	0	1	0	0	0	0	0	0	1	0	0	0	1	1	0
0	0	1	0	1	0	0	0	0	1	0	0	0	0	0	0
0	0	1	0	1	0	0	1	0	1	0	0	0	1	0	1
0	0	1	0	1	0	0	1	0	1	0	0	0	1	1	1
0	0	1	0	1	0	0	0	0	1	0	0	0	1	1	1
0	0	0	1	1	0	1	0	0	1	0	0	0	1	0	1
0	0	0	1	1	0	0	1	0	1	0	0	0	1	1	1
0	0	0	1	1	0	0	0	0	1	0	0	0	1	1	0
1	0	0	0	1	0	0	0	0	1	1	0	0	0	0	0
1	0	0	0	1	0	0	1	0	1	1	0	0	1	0	1
1	0	0	0	1	0	0	1	0	1	1	0	0	1	1	1
1	0	0	0	1	0	0	0	0	1	1	0	0	1	1	1
1	0	0	1	1	0	1	0	0	0	1	1	0	1	0	1
1	0	0	1	1	0	0	1	0	0	1	1	0	1	1	1
1	0	0	1	1	0	0	0	0	0	1	1	0	1	1	1
0	0	1	0	0	0	0	0	1	0	1	0	0	1	0	0
0	0	1	0	0	0	0	1	0	0	1	0	0	1	1	1
0	0	1	0	0	0	0	0	0	0	1	0	0	1	1	1
0	0	0	0	0	0	0	0	1	1	0	0	0	1	0	0
0	0	0	0	0	0	0	1	0	1	0	0	0	1	1	1
0	0	0	0	0	0	0	0	0	1	0	0	0	1	1	0
0	0	0	0	0	0	0	0	1	0	0	0	0	1	0	0
0	0	0	0	0	0	0	1	0	0	0	0	0	1	1	1
0	0	0	0	0	0	0	0	0	0	0	0	0	1	1	0
0	0	0	0	1	0	0	0	0	0	1	0	0	0	0	0
0	0	0	0	1	0	0	1	0	0	1	0	0	1	0	1
0	0	0	0	1	0	0	1	0	0	1	0	0	1	1	1
0	0	0	0	1	0	0	0	0	0	1	0	0	1	1	1
1	0	0	1	1	0	1	0	0	1	1	0	0	1	0	0
1	0	0	1	1	0	0	1	0	1	1	0	0	1	1	0
1	0	0	1	1	0	0	0	0	1	1	0	0	1	1	0
1	0	0	1	1	0	1	0	0	1	1	1	1	1	0	0
1	0	0	1	1	0	0	1	0	1	1	1	1	1	1	1
1	0	0	1	1	0	0	0	0	1	1	1	1	1	1	1
0	0	1	0	1	0	0	0	0	0	0	0	0	0	0	0
0	0	1	0	1	0	0	1	0	0	0	0	0	1	0	1
0	0	1	0	1	0	0	1	0	0	0	0	0	1	1	1
0	0	1	0	1	0	0	0	0	0	0	0	0	1	1	0
0	0	1	0	0	0	0	0	1	0	1	1	0	1	0	0
0	0	1	0	0	0	0	1	0	0	1	1	0	1	1	0
0	0	1	0	0	0	0	0	0	0	1	1	0	1	1	0
0	0	0	0	0	0	0	0	1	0	1	0	0	1	0	0
0	0	0	0	0	0	0	1	0	0	1	0	0	1	1	0
0	0	0	0	0	0	0	0	0	0	1	0	0	1	1	0
1	0	0	0	0	0	1	0	0	1	1	1	0	1	0	0
1	0	0	0	0	0	0	1	0	1	1	1	0	1	1	1
1	0	0	0	0	0	0	0	0	1	1	1	0	1	1	1
0	0	0	0	1	0	0	0	0	0	0	0	0	0	0	0
0	0	0	0	1	0	0	1	0	0	0	0	0	1	0	0
0	0	0	0	1	0	0	1	0	0	0	0	0	1	1	0
0	0	0	0	1	0	0	0	0	0	0	0	0	1	1	0
0	0	1	0	1	0	0	0	0	0	1	0	0	0	0	0
0	0	1	0	1	0	0	1	0	0	1	0	0	1	0	1
0	0	1	0	1	0	0	1	0	0	1	0	0	1	1	1
0	0	1	0	1	0	0	0	0	0	1	0	0	1	1	0
0	0	0	0	0	0	0	0	1	0	0	0	0	1	0	0
0	0	0	0	0	0	0	1	0	0	0	0	0	1	1	0
0	0	0	0	0	0	0	0	0	0	0	0	0	1	1	0
0	0	0	0	0	0	0	0	1	1	1	0	0	1	0	0
0	0	0	0	0	0	0	1	0	1	1	0	0	1	1	0
0	0	0	0	0	0	0	0	0	1	1	0	0	1	1	0
0	0	1	0	0	0	0	0	1	0	1	0	0	1	0	0
0	0	1	0	0	0	0	1	0	0	1	0	0	1	1	0
0	0	1	0	0	0	0	0	0	0	1	0	0	1	1	0
0	0	1	0	1	0	0	0	0	0	1	0	0	0	0	0
0	0	1	0	1	0	0	1	0	0	1	0	0	1	0	1
0	0	1	0	1	0	0	1	0	0	1	0	0	1	1	0
0	0	1	0	1	0	0	0	0	0	1	0	0	1	1	0
1	0	0	0	0	0	0	0	1	1	0	0	1	1	0	1
1	0	0	0	0	0	0	1	0	1	0	0	1	1	1	1
1	0	0	0	0	0	0	0	0	1	0	0	1	1	1	1
0	0	0	1	1	0	1	0	0	0	0	0	0	1	0	1
0	0	0	1	1	0	0	1	0	0	0	0	0	1	1	1
0	0	0	1	1	0	0	0	0	0	0	0	0	1	1	0
0	0	1	1	1	0	1	0	0	1	0	1	0	1	0	1
0	0	1	1	1	0	0	1	0	1	0	1	0	1	1	0
0	0	1	1	1	0	0	0	0	1	0	1	0	1	1	0
0	0	0	0	1	0	1	0	0	0	0	0	0	1	0	0
0	0	0	0	1	0	0	1	0	0	0	0	0	1	1	0
0	0	0	0	1	0	0	0	0	0	0	0	0	1	1	0
0	0	0	0	0	0	0	0	0	1	0	0	0	0	0	0
0	0	0	0	0	0	0	1	0	1	0	0	0	1	0	0
0	0	0	0	0	0	0	1	0	1	0	0	0	1	1	0
0	0	0	0	0	0	0	0	0	1	0	0	0	1	1	0
0	0	0	0	1	0	0	0	0	0	1	0	0	0	0	0
0	0	0	0	1	0	0	1	0	0	1	0	0	1	0	0
0	0	0	0	1	0	0	1	0	0	1	0	0	1	1	0
0	0	0	0	1	0	0	0	0	0	1	0	0	1	1	0
0	0	0	1	0	0	1	0	0	0	1	0	0	1	0	0
0	0	0	1	0	0	0	1	0	0	1	0	0	1	1	0
0	0	0	1	0	0	0	0	0	0	1	0	0	1	1	0
1	0	0	0	1	0	0	0	0	0	0	0	0	0	0	1
1	0	0	0	1	0	0	1	0	0	0	0	0	1	0	1
1	0	0	0	1	0	0	1	0	0	0	0	0	1	1	1
1	0	0	0	1	0	0	0	0	0	0	0	0	1	1	0
1	0	0	0	0	0	0	0	0	0	0	0	0	0	0	1
1	0	0	0	0	0	0	1	0	0	0	0	0	1	0	1
1	0	0	0	0	0	0	1	0	0	0	0	0	1	1	1
1	0	0	0	0	0	0	0	0	0	0	0	0	1	1	1
0	0	0	0	0	0	1	0	0	0	1	0	0	1	0	1
0	0	0	0	0	0	0	1	0	0	1	0	0	1	1	1
0	0	0	0	0	0	0	0	0	0	1	0	0	1	1	1
0	0	1	0	0	0	0	0	1	1	1	0	0	1	0	0
0	0	1	0	0	0	0	1	0	1	1	0	0	1	1	0
0	0	1	0	0	0	0	0	0	1	1	0	0	1	1	0
0	0	0	1	1	0	1	0	0	0	1	0	0	1	0	0
0	0	0	1	1	0	0	1	0	0	1	0	0	1	1	0
0	0	0	1	1	0	0	0	0	0	1	0	0	1	1	0
0	0	1	0	0	0	0	0	1	0	0	1	0	1	0	0
0	0	1	0	0	0	0	1	0	0	0	1	0	1	1	1
0	0	1	0	0	0	0	0	0	0	0	1	0	1	1	0
0	0	0	0	0	0	0	0	0	0	1	0	0	0	0	0
0	0	0	0	0	0	0	1	0	0	1	0	0	1	0	0
0	0	0	0	0	0	0	1	0	0	1	0	0	1	1	0
0	0	0	0	0	0	0	0	0	0	1	0	0	1	1	1
0	0	0	0	1	0	0	0	0	0	1	0	0	0	0	0
0	0	0	0	1	0	0	1	0	0	1	0	0	1	0	0
0	0	0	0	1	0	0	1	0	0	1	0	0	1	1	0
0	0	0	0	1	0	0	0	0	0	1	0	0	1	1	0
0	0	0	0	0	0	0	0	1	0	1	0	0	1	0	0
0	0	0	0	0	0	0	1	0	0	1	0	0	1	1	0
0	0	0	0	0	0	0	0	0	0	1	0	0	1	1	0
0	0	1	1	1	0	1	0	0	0	1	0	0	1	0	1
0	0	1	1	1	0	0	1	0	0	1	0	0	1	1	1
0	0	1	1	1	0	0	0	0	0	1	0	0	1	1	1
0	0	1	1	1	0	1	0	0	0	0	0	0	1	0	0
0	0	1	1	1	0	0	1	0	0	0	0	0	1	1	1
0	0	1	1	1	0	0	0	0	0	0	0	0	1	1	0
0	0	1	0	0	0	0	0	1	0	0	1	0	1	0	0
0	0	1	0	0	0	0	1	0	0	0	1	0	1	1	0
0	0	1	0	0	0	0	0	0	0	0	1	0	1	1	0
1	0	0	1	1	0	1	0	0	0	1	0	0	1	0	1
1	0	0	1	1	0	0	1	0	0	1	0	0	1	1	1
1	0	0	1	1	0	0	0	0	0	1	0	0	1	1	1
1	0	0	0	0	0	0	0	1	0	1	0	0	1	0	0
1	0	0	0	0	0	0	1	0	0	1	0	0	1	1	1
1	0	0	0	0	0	0	0	0	0	1	0	0	1	1	1
0	0	0	0	0	1	0	0	1	0	0	0	0	1	0	1
0	0	0	0	0	1	0	1	0	0	0	0	0	1	1	1
0	0	0	0	0	1	0	0	0	0	0	0	0	1	1	1
0	0	0	1	1	0	1	0	0	1	0	0	0	1	0	1
0	0	0	1	1	0	0	1	0	1	0	0	0	1	1	0
0	0	0	1	1	0	0	0	0	1	0	0	0	1	1	1
0	0	0	0	0	0	0	0	1	0	1	0	0	1	0	0
0	0	0	0	0	0	0	1	0	0	1	0	0	1	1	0
0	0	0	0	0	0	0	0	0	0	1	0	0	1	1	0
0	0	0	0	1	0	0	0	0	0	0	0	0	0	0	0
0	0	0	0	1	0	0	1	0	0	0	0	0	1	0	0
0	0	0	0	1	0	0	1	0	0	0	0	0	1	1	0
0	0	0	0	1	0	0	0	0	0	0	0	0	1	1	0
0	0	0	1	1	0	1	0	0	0	1	0	0	1	0	1
0	0	0	1	1	0	0	1	0	0	1	0	0	1	1	1
0	0	0	1	1	0	0	0	0	0	1	0	0	1	1	1
0	1	0	0	1	0	0	0	0	1	0	0	0	0	0	0
0	1	0	0	1	0	0	1	0	1	0	0	0	1	0	1
0	1	0	0	1	0	0	1	0	1	0	0	0	1	1	1
0	1	0	0	1	0	0	0	0	1	0	0	0	1	1	1
1	0	0	0	0	0	0	0	1	1	0	0	0	1	0	0
1	0	0	0	0	0	0	1	0	1	0	0	0	1	1	1
1	0	0	0	0	0	0	0	0	1	0	0	0	1	1	1
0	0	0	0	0	0	0	0	1	1	1	0	0	1	0	0
0	0	0	0	0	0	0	1	0	1	1	0	0	1	1	0
0	0	0	0	0	0	0	0	0	1	1	0	0	1	1	0
0	0	1	1	1	0	1	0	0	0	0	0	0	1	0	1
0	0	1	1	1	0	0	1	0	0	0	0	0	1	1	1
0	0	1	1	1	0	0	0	0	0	0	0	0	1	1	1
1	0	0	1	1	0	1	0	0	0	0	0	0	1	0	1
1	0	0	1	1	0	0	1	0	0	0	0	0	1	1	1
1	0	0	1	1	0	0	0	0	0	0	0	0	1	1	1
0	0	1	1	1	0	1	0	0	1	0	0	0	1	0	1
0	0	1	1	1	0	0	1	0	1	0	0	0	1	1	1
0	0	1	1	1	0	0	0	0	1	0	0	0	1	1	1
0	0	1	1	1	0	1	0	0	0	0	0	0	1	0	0
0	0	1	1	1	0	0	1	0	0	0	0	0	1	1	0
0	0	1	1	1	0	0	0	0	0	0	0	0	1	1	0
0	0	1	1	1	0	1	0	0	1	1	0	0	1	0	0
0	0	1	1	1	0	0	1	0	1	1	0	0	1	1	0
0	0	1	1	1	0	0	0	0	1	1	0	0	1	1	0
0	0	1	0	0	0	0	0	1	1	0	1	0	1	0	0
0	0	1	0	0	0	0	1	0	1	0	1	0	1	1	1
0	0	1	0	0	0	0	0	0	1	0	1	0	1	1	1
1	0	0	0	0	0	0	0	1	0	0	0	0	1	0	0
1	0	0	0	0	0	0	1	0	0	0	0	0	1	1	1
1	0	0	0	0	0	0	0	0	0	0	0	0	1	1	1
0	0	0	0	1	0	0	0	0	1	0	0	0	0	0	1
0	0	0	0	1	0	0	1	0	1	0	0	0	1	0	0
0	0	0	0	1	0	0	1	0	1	0	0	0	1	1	1
0	0	0	0	1	0	0	0	0	1	0	0	0	1	1	1
0	0	1	0	0	0	0	0	0	0	1	0	0	0	0	0
0	0	1	0	0	0	0	1	0	0	1	0	0	1	0	1
0	0	1	0	0	0	0	1	0	0	1	0	0	1	1	1
0	0	1	0	0	0	0	0	0	0	1	0	0	1	1	0
0	0	1	0	0	0	0	0	1	0	1	0	0	1	0	0
0	0	1	0	0	0	0	1	0	0	1	0	0	1	1	1
0	0	1	0	0	0	0	0	0	0	1	0	0	1	1	1
0	1	0	0	0	0	0	0	1	1	1	1	0	1	0	1
0	1	0	0	0	0	0	1	0	1	1	1	0	1	1	1
0	1	0	0	0	0	0	0	0	1	1	1	0	1	1	1
0	0	0	0	0	0	0	0	1	0	1	1	0	1	0	0
0	0	0	0	0	0	0	1	0	0	1	1	0	1	1	0
0	0	0	0	0	0	0	0	0	0	1	1	0	1	1	0
0	1	0	1	1	0	1	0	0	0	1	0	0	1	0	1
0	1	0	1	1	0	0	1	0	0	1	0	0	1	1	1
0	1	0	1	1	0	0	0	0	0	1	0	0	1	1	0
0	0	1	1	1	0	1	0	0	1	1	0	0	1	0	1
0	0	1	1	1	0	0	1	0	1	1	0	0	1	1	1
0	0	1	1	1	0	0	0	0	1	1	0	0	1	1	1
0	0	0	0	0	0	0	0	1	0	1	1	0	1	0	0
0	0	0	0	0	0	0	1	0	0	1	1	0	1	1	1
0	0	0	0	0	0	0	0	0	0	1	1	0	1	1	0
0	1	0	1	1	0	1	0	0	1	0	0	0	1	0	1
0	1	0	1	1	0	0	1	0	1	0	0	0	1	1	1
0	1	0	1	1	0	0	0	0	1	0	0	0	1	1	1
1	0	0	1	1	0	1	0	0	0	0	0	0	1	0	0
1	0	0	1	1	0	0	1	0	0	0	0	0	1	1	1
1	0	0	1	1	0	0	0	0	0	0	0	0	1	1	1
0	1	0	0	1	0	0	0	0	1	0	0	0	0	0	0
0	1	0	0	1	0	0	1	0	1	0	0	0	1	0	1
0	1	0	0	1	0	0	1	0	1	0	0	0	1	1	1
0	1	0	0	1	0	0	0	0	1	0	0	0	1	1	1
0	0	0	0	1	0	0	0	0	0	1	0	0	0	0	0
0	0	0	0	1	0	0	1	0	0	1	0	0	1	0	1
0	0	0	0	1	0	0	1	0	0	1	0	0	1	1	0
0	0	0	0	1	0	0	0	0	0	1	0	0	1	1	0
0	0	0	1	1	0	1	0	0	0	0	1	0	1	0	0
0	0	0	1	1	0	0	1	0	0	0	1	0	1	1	0
0	0	0	1	1	0	0	0	0	0	0	1	0	1	1	0
0	0	1	1	0	0	1	0	0	0	1	0	0	1	0	1
0	0	1	1	0	0	0	1	0	0	1	0	0	1	1	1
0	0	1	1	0	0	0	0	0	0	1	0	0	1	1	1
0	0	0	0	0	0	0	0	0	0	0	0	0	0	0	0
0	0	0	0	0	0	0	1	0	0	0	0	0	1	0	0
0	0	0	0	0	0	0	1	0	0	0	0	0	1	1	0
0	0	0	0	0	0	0	0	0	0	0	0	0	1	1	0
0	1	0	1	1	0	1	0	0	0	1	0	0	1	0	1
0	1	0	1	1	0	0	1	0	0	1	0	0	1	1	1
0	1	0	1	1	0	0	0	0	0	1	0	0	1	1	0
0	0	1	0	0	0	0	0	1	1	1	0	0	1	0	0
0	0	1	0	0	0	0	1	0	1	1	0	0	1	1	1
0	0	1	0	0	0	0	0	0	1	1	0	0	1	1	1
0	1	0	1	1	0	1	0	0	0	1	0	0	1	0	0
0	1	0	1	1	0	0	1	0	0	1	0	0	1	1	1
0	1	0	1	1	0	0	0	0	0	1	0	0	1	1	1
0	0	0	0	0	0	0	0	1	1	1	0	0	1	0	0
0	0	0	0	0	0	0	1	0	1	1	0	0	1	1	0
0	0	0	0	0	0	0	0	0	1	1	0	0	1	1	0
0	1	0	1	1	0	1	0	0	1	1	0	0	1	0	0
0	1	0	1	1	0	0	1	0	1	1	0	0	1	1	0
0	1	0	1	1	0	0	0	0	1	1	0	0	1	1	1
1	0	0	0	1	0	0	0	0	0	1	0	0	0	0	0
1	0	0	0	1	0	0	1	0	0	1	0	0	1	0	1
1	0	0	0	1	0	0	1	0	0	1	0	0	1	1	1
1	0	0	0	1	0	0	0	0	0	1	0	0	1	1	1
1	0	0	0	1	0	0	0	0	0	1	0	0	0	0	0
1	0	0	0	1	0	0	1	0	0	1	0	0	1	0	1
1	0	0	0	1	0	0	1	0	0	1	0	0	1	1	1
1	0	0	0	1	0	0	0	0	0	1	0	0	1	1	1
0	0	0	1	0	0	1	0	0	0	1	1	0	1	0	0
0	0	0	1	0	0	0	1	0	0	1	1	0	1	1	0
0	0	0	1	0	0	0	0	0	0	1	1	0	1	1	0
0	0	1	1	1	0	1	0	0	0	0	0	0	1	0	0
0	0	1	1	1	0	0	1	0	0	0	0	0	1	1	1
0	0	1	1	1	0	0	0	0	0	0	0	0	1	1	1
0	1	0	0	0	0	0	0	1	1	0	0	0	1	0	1
0	1	0	0	0	0	0	1	0	1	0	0	0	1	1	1
0	1	0	0	0	0	0	0	0	1	0	0	0	1	1	1
0	1	0	1	1	0	1	0	0	1	1	0	0	1	0	1
0	1	0	1	1	0	0	1	0	1	1	0	0	1	1	1
0	1	0	1	1	0	0	0	0	1	1	0	0	1	1	1
0	0	0	0	0	0	0	0	1	0	1	0	0	1	0	0
0	0	0	0	0	0	0	1	0	0	1	0	0	1	1	0
0	0	0	0	0	0	0	0	0	0	1	0	0	1	1	0
1	0	0	1	1	0	1	0	0	0	0	0	0	1	0	1
1	0	0	1	1	0	0	1	0	0	0	0	0	1	1	1
1	0	0	1	1	0	0	0	0	0	0	0	0	1	1	0
0	0	0	0	0	0	0	0	1	0	1	0	0	1	0	0
0	0	0	0	0	0	0	1	0	0	1	0	0	1	1	0
0	0	0	0	0	0	0	0	0	0	1	0	0	1	1	0
0	1	0	0	0	0	0	0	1	1	0	0	0	1	0	0
0	1	0	0	0	0	0	1	0	1	0	0	0	1	1	1
0	1	0	0	0	0	0	0	0	1	0	0	0	1	1	1
0	0	0	0	0	0	0	0	1	0	1	0	0	1	0	1
0	0	0	0	0	0	0	1	0	0	1	0	0	1	1	0
0	0	0	0	0	0	0	0	0	0	1	0	0	1	1	0
0	0	1	0	0	0	0	0	0	0	0	0	0	0	0	0
0	0	1	0	0	0	0	1	0	0	0	0	0	1	0	0
0	0	1	0	0	0	0	1	0	0	0	0	0	1	1	0
0	0	1	0	0	0	0	0	0	0	0	0	0	1	1	0
0	0	1	0	0	0	0	0	1	0	1	0	0	1	0	0
0	0	1	0	0	0	0	1	0	0	1	0	0	1	1	1
0	0	1	0	0	0	0	0	0	0	1	0	0	1	1	0
1	0	0	1	1	0	1	0	0	0	0	0	0	1	0	1
1	0	0	1	1	0	0	1	0	0	0	0	0	1	1	1
1	0	0	1	1	0	0	0	0	0	0	0	0	1	1	0
0	0	0	1	1	0	1	0	0	0	0	0	0	1	0	0
0	0	0	1	1	0	0	1	0	0	0	0	0	1	1	0
0	0	0	1	1	0	0	0	0	0	0	0	0	1	1	0
0	0	0	0	0	0	0	0	1	0	1	0	0	1	0	0
0	0	0	0	0	0	0	1	0	0	1	0	0	1	1	0
0	0	0	0	0	0	0	0	0	0	1	0	0	1	1	0
1	0	0	1	1	0	1	0	0	1	1	0	1	1	0	1
1	0	0	1	1	0	0	1	0	1	1	0	1	1	1	1
1	0	0	1	1	0	0	0	0	1	1	0	1	1	1	1
0	0	0	1	1	0	1	0	0	1	0	0	0	1	0	0
0	0	0	1	1	0	0	1	0	1	0	0	0	1	1	0
0	0	0	1	1	0	0	0	0	1	0	0	0	1	1	0
0	0	1	0	0	0	0	0	1	1	1	0	0	1	0	0
0	0	1	0	0	0	0	1	0	1	1	0	0	1	1	1
0	0	1	0	0	0	0	0	0	1	1	0	0	1	1	1
0	0	0	1	1	0	1	0	0	0	1	0	0	1	0	1
0	0	0	1	1	0	0	1	0	0	1	0	0	1	1	1
0	0	0	1	1	0	0	0	0	0	1	0	0	1	1	0
0	0	1	1	1	0	1	0	0	0	0	0	0	1	0	1
0	0	1	1	1	0	0	1	0	0	0	0	0	1	1	1
0	0	1	1	1	0	0	0	0	0	0	0	0	1	1	1
1	0	0	0	0	0	0	0	1	0	1	0	1	1	0	1
1	0	0	0	0	0	0	1	0	0	1	0	1	1	1	1
1	0	0	0	0	0	0	0	0	0	1	0	1	1	1	1
1	0	0	0	0	0	0	0	1	1	0	0	0	1	0	0
1	0	0	0	0	0	0	1	0	1	0	0	0	1	1	1
1	0	0	0	0	0	0	0	0	1	0	0	0	1	1	0
0	0	0	0	0	0	0	0	1	1	0	0	0	1	0	0
0	0	0	0	0	0	0	1	0	1	0	0	0	1	1	1
0	0	0	0	0	0	0	0	0	1	0	0	0	1	1	0
0	0	0	0	1	1	1	0	0	0	0	0	0	1	0	1
0	0	0	0	1	1	0	1	0	0	0	0	0	1	1	1
0	0	0	0	1	1	0	0	0	0	0	0	0	1	1	1
1	0	0	0	0	0	0	0	1	1	1	0	0	1	0	0
1	0	0	0	0	0	0	1	0	1	1	0	0	1	1	1
1	0	0	0	0	0	0	0	0	1	1	0	0	1	1	0
0	0	1	1	1	0	1	0	0	0	0	0	0	1	0	0
0	0	1	1	1	0	0	1	0	0	0	0	0	1	1	0
0	0	1	1	1	0	0	0	0	0	0	0	0	1	1	0
0	0	1	0	0	0	0	0	1	1	1	1	0	1	0	0
0	0	1	0	0	0	0	1	0	1	1	1	0	1	1	1
0	0	1	0	0	0	0	0	0	1	1	1	0	1	1	1
0	0	0	1	1	1	1	0	0	0	0	0	0	1	0	1
0	0	0	1	1	1	0	1	0	0	0	0	0	1	1	1
0	0	0	1	1	1	0	0	0	0	0	0	0	1	1	1
0	0	0	0	0	0	0	0	1	0	0	0	0	1	0	0
0	0	0	0	0	0	0	1	0	0	0	0	0	1	1	0
0	0	0	0	0	0	0	0	0	0	0	0	0	1	1	0
0	1	0	0	0	0	1	0	0	0	0	0	0	1	0	0
0	1	0	0	0	0	0	1	0	0	0	0	0	1	1	1
0	1	0	0	0	0	0	0	0	0	0	0	0	1	1	0
1	0	0	0	0	0	0	0	1	0	0	1	0	1	0	0
1	0	0	0	0	0	0	1	0	0	0	1	0	1	1	1
0	0	0	0	0	0	0	0	0	0	0	0	0	0	0	0
0	0	0	0	0	0	0	1	0	0	0	0	0	1	0	0
0	0	0	0	0	0	0	1	0	0	0	0	0	1	1	0
0	0	0	0	0	0	0	0	0	0	0	0	0	1	1	0
0	0	0	0	1	1	0	0	0	0	1	0	0	0	0	1
0	0	0	0	1	1	0	1	0	0	1	0	0	1	0	1
0	0	0	0	1	1	0	1	0	0	1	0	0	1	1	1
0	0	0	0	1	1	0	0	0	0	1	0	0	1	1	1
1	0	0	0	0	0	0	0	1	0	1	0	0	1	0	0
1	0	0	0	0	0	0	1	0	0	1	0	0	1	1	1
1	0	0	0	0	0	0	0	0	0	1	0	0	1	1	0
0	0	0	1	1	0	1	0	0	0	1	0	0	1	0	1
0	0	0	1	1	0	0	1	0	0	1	0	0	1	1	1
0	0	0	1	1	0	0	0	0	0	1	0	0	1	1	1
0	0	0	0	0	0	0	0	1	0	1	0	0	1	0	0
0	0	0	0	0	0	0	1	0	0	1	0	0	1	1	0
0	0	0	0	0	0	0	0	0	0	1	0	0	1	1	0
0	0	1	0	1	0	0	0	0	0	1	0	0	0	0	0
0	0	1	0	1	0	0	1	0	0	1	0	0	1	0	1
0	0	1	0	1	0	0	1	0	0	1	0	0	1	1	1
0	0	1	0	1	0	0	0	0	0	1	0	0	1	1	1
0	0	0	1	1	0	1	0	0	1	0	0	0	1	0	0
0	0	0	1	1	0	0	1	0	1	0	0	0	1	1	0
0	0	0	1	1	0	0	0	0	1	0	0	0	1	1	0
0	0	1	0	0	0	0	1	0	0	0	1	0	1	1	1
0	0	1	0	0	0	0	0	0	0	0	1	0	1	1	0
0	0	0	0	0	0	0	0	1	1	0	0	0	1	0	0
0	0	0	0	0	0	0	1	0	1	0	0	0	1	1	0
0	0	0	0	0	0	0	0	0	1	0	0	0	1	1	0
0	0	0	1	1	0	1	0	0	1	0	0	0	1	0	1
0	0	0	1	1	0	0	1	0	1	0	0	0	1	1	1
0	0	0	1	1	0	0	0	0	1	0	0	0	1	1	1
0	0	0	0	1	0	0	0	0	0	0	0	0	0	0	0
0	0	0	0	1	0	0	1	0	0	0	0	0	1	0	0
0	0	0	0	1	0	0	1	0	0	0	0	0	1	1	0
0	0	0	0	1	0	0	0	0	0	0	0	0	1	1	0
0	0	1	0	1	0	0	0	0	0	1	0	0	0	0	0
0	0	1	0	1	0	0	1	0	0	1	0	0	1	0	1
0	0	1	0	1	0	0	1	0	0	1	0	0	1	1	1
0	0	1	0	1	0	0	0	0	0	1	0	0	1	1	0
0	1	0	1	1	0	1	0	0	0	0	0	0	1	0	1
0	1	0	1	1	0	0	1	0	0	0	0	0	1	1	1
0	1	0	1	1	0	0	0	0	0	0	0	0	1	1	1
0	0	0	1	1	0	1	0	0	1	1	0	0	1	0	1
0	0	0	1	1	0	0	1	0	1	1	0	0	1	1	1
0	0	0	1	1	0	0	0	0	1	1	0	0	1	1	0
0	0	0	0	0	0	0	0	1	1	1	0	0	1	0	0
0	0	0	0	0	0	0	1	0	1	1	0	0	1	1	0
0	0	0	0	0	0	0	0	0	1	1	0	0	1	1	0
0	0	1	0	0	0	0	0	1	1	1	0	0	1	0	0
0	0	1	0	0	0	0	1	0	1	1	0	0	1	1	1
0	0	1	0	0	0	0	0	0	1	1	0	0	1	1	0
0	0	0	1	1	1	1	0	0	1	1	0	0	1	0	1
0	0	0	1	1	1	0	1	0	1	1	0	0	1	1	1
0	0	0	1	1	1	0	0	0	1	1	0	0	1	1	1
0	0	1	0	1	0	0	0	0	0	0	1	0	0	0	0
0	0	1	0	1	0	0	1	0	0	0	1	0	1	0	1
0	0	1	0	1	0	0	1	0	0	0	1	0	1	1	1
0	0	1	0	1	0	0	0	0	0	0	1	0	1	1	1
0	0	0	1	1	0	1	0	0	0	1	0	0	1	0	0
0	0	0	1	1	0	0	1	0	0	1	0	0	1	1	0
0	0	0	1	1	0	0	0	0	0	1	0	0	1	1	0
0	1	0	1	1	0	1	0	0	0	0	0	0	1	0	1
0	1	0	1	1	0	0	1	0	0	0	0	0	1	1	1
0	1	0	1	1	0	0	0	0	0	0	0	0	1	1	1
0	0	1	0	0	0	0	0	1	0	1	0	0	1	0	0
0	0	1	0	0	0	0	1	0	0	1	0	0	1	1	1
0	0	1	0	0	0	0	0	0	0	1	0	0	1	1	0
0	0	1	0	1	0	0	0	0	0	0	0	0	0	0	0
0	0	1	0	1	0	0	1	0	0	0	0	0	1	0	1
0	0	1	0	1	0	0	1	0	0	0	0	0	1	1	0
0	0	1	0	1	0	0	0	0	0	0	0	0	1	1	1
0	0	0	0	1	0	0	0	0	0	1	0	0	0	0	1
0	0	0	0	1	0	0	1	0	0	1	0	0	1	0	1
0	0	0	0	1	0	0	1	0	0	1	0	0	1	1	0
0	0	0	0	1	0	0	0	0	0	1	0	0	1	1	0
0	0	0	1	1	0	1	0	0	0	1	0	0	1	0	0
0	0	0	1	1	0	0	1	0	0	1	0	0	1	1	1
0	0	0	1	1	0	0	0	0	0	1	0	0	1	1	0
0	0	1	0	1	0	0	0	0	0	1	0	0	0	0	0
0	0	1	0	1	0	0	1	0	0	1	0	0	1	0	1
0	0	1	0	1	0	0	1	0	0	1	0	0	1	1	1
0	0	1	0	1	0	0	0	0	0	1	0	0	1	1	1
1	0	0	0	0	0	0	0	1	1	1	0	0	1	0	0
1	0	0	0	0	0	0	1	0	1	1	0	0	1	1	1
1	0	0	0	0	0	0	0	0	1	1	0	0	1	1	1
1	0	0	1	1	0	1	0	0	0	1	0	0	1	0	1
1	0	0	1	1	0	0	1	0	0	1	0	0	1	1	1
1	0	0	1	1	0	0	0	0	0	1	0	0	1	1	1
0	0	0	0	1	0	0	0	0	0	0	0	0	0	0	0
0	0	0	0	1	0	0	1	0	0	0	0	0	1	0	0
0	0	0	0	1	0	0	1	0	0	0	0	0	1	1	0
0	0	0	0	1	0	0	0	0	0	0	0	0	1	1	0
0	0	0	0	0	0	0	0	1	0	1	0	0	1	0	0
0	0	0	0	0	0	0	1	0	0	1	0	0	1	1	0
0	0	0	0	0	0	0	0	0	0	1	0	0	1	1	0
0	0	0	1	1	0	1	0	0	1	1	0	0	1	0	0
0	0	0	1	1	0	0	1	0	1	1	0	0	1	1	1
0	0	0	1	1	0	0	0	0	1	1	0	0	1	1	1
0	0	0	0	1	0	0	0	0	0	1	0	0	0	0	0
0	0	0	0	1	0	0	1	0	0	1	0	0	1	0	1
0	0	0	0	1	0	0	1	0	0	1	0	0	1	1	1
0	0	0	0	1	0	0	0	0	0	1	0	0	1	1	0
1	0	0	1	1	0	1	0	0	0	0	0	0	1	0	1
1	0	0	1	1	0	0	1	0	0	0	0	0	1	1	1
1	0	0	1	1	0	0	0	0	0	0	0	0	1	1	1
0	0	0	1	1	0	1	0	0	0	1	0	0	1	0	0
0	0	0	1	1	0	0	1	0	0	1	0	0	1	1	0
0	0	0	1	1	0	0	0	0	0	1	0	0	1	1	0
0	0	1	0	0	0	0	0	1	0	0	0	0	1	0	1
0	0	1	0	0	0	0	1	0	0	0	0	0	1	1	1
0	0	1	0	0	0	0	0	0	0	0	0	0	1	1	0
0	0	0	1	1	0	1	0	0	0	1	0	0	1	0	0
0	0	0	1	1	0	0	1	0	0	1	0	0	1	1	0
0	0	0	1	1	0	0	0	0	0	1	0	0	1	1	0
0	0	1	1	1	0	1	0	0	0	0	0	0	1	0	1
0	0	1	1	1	0	0	1	0	0	0	0	0	1	1	1
0	0	1	1	1	0	0	0	0	0	0	0	0	1	1	1
0	1	0	0	0	0	0	0	0	1	1	1	1	1	0	1
0	1	0	0	0	0	0	0	1	1	1	1	1	0	0	1
1	0	0	0	1	0	0	0	0	0	0	0	0	1	0	1
1	0	0	0	1	0	0	1	0	0	0	0	0	0	0	0
0	0	0	0	1	0	0	0	0	1	1	0	0	1	0	0
0	0	0	0	1	0	0	1	0	1	1	0	0	0	0	1
0	0	0	0	0	0	0	0	0	0	1	0	0	1	0	0
0	0	0	0	0	0	0	0	1	0	1	0	0	0	0	0
1	0	0	0	1	0	0	0	0	1	0	0	0	1	0	1
1	0	0	0	1	0	0	1	0	1	0	0	0	0	0	1
0	0	0	0	0	0	0	0	0	0	0	0	0	1	0	0
0	0	0	0	0	0	0	0	1	0	0	0	0	0	0	0
0	0	0	0	0	0	0	0	1	1	1	0	0	0	0	0
0	0	0	0	1	0	0	0	0	0	1	0	0	1	0	0
0	0	0	0	1	0	0	1	0	0	1	0	0	0	0	0
0	0	1	1	1	0	0	0	0	0	0	0	0	1	0	1
0	0	1	1	1	0	0	0	0	0	0	0	0	1	0	1
0	0	1	0	1	0	0	0	0	0	0	1	1	1	0	1
0	0	1	0	1	0	0	1	0	0	0	1	1	0	0	1
0	1	0	1	1	0	0	0	0	0	0	1	0	1	0	1
0	1	0	1	1	0	0	0	0	0	0	1	0	1	0	1
1	0	0	1	1	0	0	0	0	0	0	0	0	1	0	1
1	0	0	1	1	0	0	0	0	0	0	0	0	1	0	0
1	0	0	1	1	0	0	0	0	1	1	0	0	1	0	1
1	0	0	1	1	0	0	0	0	1	1	0	0	1	0	0
1	0	0	0	1	0	0	0	0	1	0	0	0	1	0	1
1	0	0	0	1	0	0	1	0	1	0	0	0	0	0	0
1	0	0	1	1	0	0	0	0	1	1	0	0	1	0	1
1	0	0	1	1	0	0	0	0	1	1	0	0	1	0	1
1	0	0	0	0	0	0	0	0	1	1	0	0	1	0	1
1	0	0	0	0	0	0	1	0	1	1	0	0	0	0	1
0	0	0	1	1	0	0	0	0	1	1	0	0	1	0	0
0	0	0	1	1	0	0	1	0	1	1	0	0	0	0	0
0	0	1	0	1	0	0	0	0	1	0	0	0	1	0	0
0	0	1	0	1	0	0	1	0	1	0	0	0	0	0	0
0	0	1	1	1	0	0	0	0	0	1	0	0	1	0	1
0	0	1	1	1	0	0	0	0	0	1	0	0	1	0	1
0	0	1	0	1	0	0	0	0	1	1	0	0	1	0	0
0	0	1	0	1	0	0	1	0	1	1	0	0	0	0	1
0	0	1	0	1	0	0	0	0	1	0	0	0	1	0	0
0	0	1	0	1	0	0	1	0	1	0	0	0	0	0	0
0	0	1	1	0	0	0	0	0	1	1	1	0	1	0	0
0	0	1	1	0	0	0	0	0	1	1	1	0	1	0	0
0	0	0	1	1	0	0	0	0	0	1	0	0	1	0	0
0	0	0	1	1	0	0	0	0	0	1	0	0	1	0	0
1	0	0	0	1	0	0	0	0	1	1	1	0	1	0	0
1	0	0	0	1	0	0	1	0	1	1	1	0	0	0	0
0	0	0	0	0	0	0	0	0	0	1	0	0	1	0	0
0	0	0	0	0	0	0	0	1	0	1	0	0	0	0	0
1	0	0	0	0	0	0	0	0	1	1	0	0	1	0	1
1	0	0	0	0	0	0	0	1	1	1	0	0	0	0	0
0	0	0	0	1	0	0	0	0	0	1	1	0	1	0	0
0	0	0	0	1	0	0	1	0	0	1	1	0	0	0	0
0	0	0	0	1	0	0	0	0	0	0	1	0	1	0	0
0	0	0	0	1	0	0	1	0	0	0	1	0	0	0	0
0	1	0	1	0	0	0	0	0	1	0	0	0	1	0	0
0	1	0	1	0	0	0	0	0	1	0	0	0	1	0	1
0	0	1	0	0	0	0	0	0	1	1	1	0	1	0	0
0	0	1	0	0	0	0	0	0	1	1	1	0	1	0	0
0	0	0	0	1	0	0	0	0	0	1	0	0	1	0	1
0	0	0	0	1	0	0	1	0	0	1	0	0	0	0	0
0	0	0	0	0	0	0	0	0	0	0	1	0	1	0	0
0	0	0	0	0	0	0	0	1	0	0	1	0	0	0	0
0	0	1	0	1	0	0	0	0	0	1	0	0	1	0	0
0	0	1	0	1	0	0	1	0	0	1	0	0	0	0	1
0	0	0	1	1	0	0	0	0	0	1	0	0	1	0	0
0	0	0	1	1	0	0	0	0	0	1	0	0	1	0	0
0	0	1	0	0	0	0	0	0	0	0	0	0	1	0	1
0	0	1	0	0	0	0	1	0	0	0	0	0	0	0	0
0	0	1	1	1	0	0	0	0	0	0	0	0	1	0	1
0	0	1	1	1	0	0	0	0	0	0	0	0	1	0	1
0	1	0	1	1	0	0	0	0	0	1	0	0	1	0	0
0	1	0	1	1	0	0	0	0	0	1	0	0	1	0	1
0	0	0	1	1	0	0	0	0	1	1	0	0	1	0	1
0	0	0	1	1	0	0	0	0	1	1	0	0	1	0	1
0	0	0	1	1	0	0	0	0	1	0	0	0	1	0	1
0	0	0	1	1	0	0	0	0	1	0	0	0	1	0	1
0	0	0	0	0	0	0	0	0	1	1	0	0	1	0	0
0	0	0	0	0	0	0	0	1	1	1	0	0	0	0	0
0	0	0	0	0	0	0	0	0	0	1	0	0	1	0	0
0	0	0	0	0	0	0	0	1	0	1	0	0	0	0	0
1	0	0	1	1	0	0	0	0	1	0	0	0	1	0	0
1	0	0	1	1	0	0	0	0	1	0	0	0	1	0	0
0	0	1	1	1	0	0	0	0	0	0	0	0	1	0	1
0	0	1	1	1	0	0	0	0	0	0	0	0	1	0	1
0	0	0	1	1	0	0	0	0	0	1	0	0	1	0	0
0	0	0	1	1	0	0	0	0	0	1	0	0	1	0	0
0	0	0	0	1	0	0	0	0	0	1	0	0	1	0	1
0	0	0	0	1	0	0	1	0	0	1	0	0	0	0	0
0	0	1	1	1	0	0	0	0	0	0	0	0	1	0	1
0	0	1	1	1	0	0	1	0	0	0	0	0	0	0	1
0	0	1	1	1	0	0	0	1	0	0	0	0	0	0	1
0	0	1	1	1	0	0	0	0	0	0	0	0	1	0	1
0	0	0	0	1	0	0	0	0	1	0	0	0	1	0	0
0	0	0	0	1	0	0	1	0	1	0	0	0	0	0	0
0	0	1	1	1	0	0	0	0	1	0	0	0	1	0	1
0	0	1	1	1	0	0	0	0	1	0	0	0	1	0	0
0	0	0	1	1	0	0	0	0	0	1	0	0	1	0	0
0	0	0	1	1	0	0	0	0	0	1	0	0	1	0	0
0	0	1	1	1	0	0	0	0	1	0	0	0	1	0	0
0	0	1	1	1	0	0	0	0	1	0	0	0	1	0	0
0	0	1	0	1	0	0	0	0	1	0	0	0	1	0	0
0	0	1	0	1	0	0	1	0	1	0	0	0	0	0	1
0	0	0	1	1	0	0	0	0	1	1	1	0	1	0	0
0	0	0	1	1	0	0	0	0	1	1	1	0	1	0	0
0	0	0	0	0	0	0	0	0	1	1	0	0	1	0	0
0	0	0	0	0	0	0	0	1	1	1	0	0	0	0	0
0	0	0	0	0	0	0	0	0	1	0	1	0	1	0	0
0	0	0	0	0	0	0	0	1	1	0	1	0	0	0	0
0	0	1	0	1	0	0	0	0	0	1	1	0	1	0	0
0	0	1	0	1	0	0	1	0	0	1	1	0	0	0	0
0	0	0	0	0	0	0	0	0	0	0	1	0	1	0	0
0	0	0	0	0	0	0	0	1	0	0	1	0	0	0	0
0	0	0	0	1	0	0	0	0	0	0	0	0	1	0	0
0	0	0	0	1	0	0	1	0	0	0	0	0	0	0	1
1	0	0	0	1	0	0	0	0	1	0	0	0	1	0	0
1	0	0	0	1	0	0	1	0	1	0	0	0	0	0	0
0	0	0	0	1	0	0	0	0	0	1	0	0	1	0	0
0	0	0	0	1	0	0	1	0	0	1	0	0	0	0	0
0	0	1	0	1	0	0	0	0	0	1	0	0	1	0	0
0	0	1	0	1	0	0	1	0	0	1	0	0	0	0	0
0	1	0	1	1	0	0	0	0	0	0	0	0	1	0	1
0	1	0	1	1	0	0	0	0	0	0	0	0	1	0	1
1	0	0	0	1	0	0	0	0	0	1	0	0	1	0	1
1	0	0	0	1	0	0	1	0	0	1	0	0	0	0	1
0	0	0	1	1	0	0	0	0	0	1	0	0	1	0	0
0	0	0	1	1	0	0	0	0	0	1	0	0	1	0	0
0	0	0	1	1	0	0	0	0	0	0	0	0	1	0	1
0	0	0	1	0	0	0	0	0	0	1	0	0	1	0	1
0	0	0	1	0	0	0	0	0	0	1	0	0	1	0	0
0	1	0	0	1	0	0	0	0	0	0	0	0	1	0	1
0	1	0	0	1	0	0	1	0	0	0	0	0	0	0	0
0	0	1	1	1	0	0	0	0	0	1	0	0	1	0	0
0	0	1	1	1	0	0	0	0	0	1	0	0	1	0	0
0	0	0	0	0	0	0	0	0	0	1	0	0	1	0	0
0	0	0	0	0	0	0	0	1	0	1	0	0	0	0	0
0	0	1	0	0	0	0	0	0	0	0	1	0	1	0	0
0	0	1	0	0	0	0	0	1	0	0	1	0	0	0	0
0	0	0	1	1	0	0	0	0	0	0	0	0	1	0	1
0	0	0	1	1	0	0	0	0	0	0	0	0	1	0	1
0	1	0	1	1	0	0	0	0	1	0	0	0	1	0	1
0	1	0	1	1	0	0	0	0	1	0	0	0	1	0	0
0	0	1	1	0	0	0	0	0	1	1	1	0	1	0	1
0	0	1	1	0	0	0	0	0	1	1	1	0	1	0	1
0	0	0	1	1	0	0	0	0	0	0	0	0	1	0	0
0	0	0	1	1	0	0	0	0	0	0	0	0	1	0	0
0	1	0	0	1	0	0	0	0	1	1	1	0	1	0	1
0	1	0	0	1	0	0	1	0	1	1	1	0	0	0	1
0	0	1	1	1	0	0	0	0	0	0	0	0	1	0	1
0	0	1	1	1	0	0	0	0	0	0	0	0	1	0	0
0	0	0	0	0	0	0	0	0	0	0	0	0	1	0	0
0	0	0	0	0	0	0	0	1	0	0	0	0	0	0	0
0	0	1	1	0	0	0	0	0	1	1	0	0	1	0	0
0	0	1	1	0	0	0	0	0	1	1	0	0	1	0	0
0	1	0	0	0	0	0	0	0	0	1	0	0	1	0	1
0	1	0	0	0	0	0	1	0	0	1	0	0	0	0	1
0	0	1	0	0	0	0	0	0	1	0	0	0	1	0	0
0	0	1	0	0	0	0	0	1	1	0	0	0	0	0	0
1	0	0	1	1	0	0	0	0	1	1	1	0	1	0	0
1	0	0	1	1	0	0	0	0	1	1	1	0	1	0	1
0	0	1	0	1	0	0	0	0	0	1	1	0	1	0	0
0	0	1	0	1	0	0	1	0	0	1	1	0	0	0	0
0	0	0	0	0	0	0	0	0	1	0	1	1	1	0	0
0	0	0	0	0	0	0	0	1	1	0	1	1	0	0	0
0	0	1	0	0	0	0	0	0	0	1	0	1	1	0	1
0	0	1	0	0	0	0	0	1	0	1	0	1	0	0	0
0	0	0	1	1	1	0	0	0	0	1	0	0	1	0	0
0	0	0	1	1	1	0	0	0	0	1	0	0	1	0	0
0	0	1	0	1	0	0	0	0	0	1	0	0	1	0	0
0	0	1	0	1	0	0	1	0	0	1	0	0	0	0	0
1	0	0	0	1	0	0	0	0	0	0	1	0	1	0	1
1	0	0	0	1	0	0	1	0	0	0	1	0	0	0	1
0	0	0	0	1	0	0	0	0	1	1	1	0	1	0	0
0	0	0	0	1	0	0	0	0	1	1	1	0	1	0	0
0	1	0	1	1	0	0	0	0	0	1	0	0	1	0	1
0	1	0	1	1	0	0	0	0	0	1	0	0	1	0	1
0	0	1	0	1	0	0	0	0	0	1	0	0	1	0	0
0	0	1	0	1	0	0	1	0	0	1	0	0	0	0	0
0	0	1	1	0	0	0	0	0	1	1	0	0	1	0	0
0	0	1	1	0	0	0	0	0	1	1	0	0	1	0	0
0	0	0	1	1	0	0	0	0	0	1	1	0	1	0	0
0	0	0	1	1	0	0	0	0	0	1	1	0	1	0	0
1	0	0	0	1	0	0	0	0	0	0	0	0	1	0	1
1	0	0	0	1	0	0	1	0	0	0	0	0	0	0	1
1	0	0	0	1	0	0	0	0	0	0	0	0	1	0	0
1	0	0	0	1	0	0	1	0	0	0	0	0	0	0	0
0	0	0	0	0	0	0	0	0	0	0	1	0	1	0	1
0	0	0	0	0	0	0	1	0	0	0	1	0	0	0	1
0	0	0	0	0	0	0	0	1	0	0	1	0	0	0	0
0	0	0	0	0	0	0	0	0	0	0	1	0	1	0	0
0	0	0	0	1	0	0	0	0	0	1	0	0	1	0	0
0	0	0	0	1	0	0	1	0	0	1	0	0	0	0	1
1	0	0	0	1	0	0	0	0	1	1	0	0	1	0	1
1	0	0	0	1	0	0	1	0	1	1	0	0	0	0	1
0	0	1	0	0	0	0	0	0	0	1	0	0	1	0	0
0	0	1	0	0	0	0	0	1	0	1	0	0	0	0	0
0	1	0	0	0	0	0	0	0	0	0	0	0	1	0	1
0	1	0	0	0	0	0	0	0	0	0	0	0	1	0	1
0	0	1	1	1	0	0	0	0	1	0	0	0	1	0	0
0	0	1	1	1	0	0	1	0	1	0	0	0	0	0	1
0	0	1	0	1	0	0	0	0	0	1	0	0	1	0	1
0	0	1	0	1	0	0	1	0	0	1	0	0	0	0	0
0	0	1	0	0	0	0	0	0	1	1	1	0	1	0	0
0	0	1	0	0	0	0	0	0	1	1	1	0	1	0	0
0	0	0	0	0	0	0	0	0	0	1	1	0	1	0	0
0	0	0	0	0	0	0	0	0	0	1	1	0	1	0	0
0	0	1	0	1	0	0	0	0	1	1	0	1	1	0	0
0	0	1	0	1	0	0	1	0	1	1	0	1	0	0	1
1	0	0	0	1	0	0	0	0	0	1	0	0	1	0	1
0	0	0	1	1	0	0	0	0	0	0	0	0	1	0	0
0	0	0	1	1	0	0	0	0	0	0	0	0	1	0	0
1	0	0	0	0	0	0	0	0	1	0	0	0	1	0	1
1	0	0	0	0	0	0	0	1	1	0	0	0	0	0	1
1	0	0	1	0	0	0	0	0	0	1	0	0	1	0	1
1	0	0	1	0	0	0	0	0	0	1	0	0	1	0	1
0	0	1	1	1	0	0	0	0	0	0	0	0	1	0	1
0	0	1	1	1	0	0	0	0	0	0	0	0	1	0	1
0	0	0	0	0	0	0	0	0	1	0	0	0	1	0	0
0	0	0	0	0	0	0	0	0	1	0	0	0	1	0	0
1	0	0	0	0	0	0	0	0	1	0	0	0	1	0	0
1	0	0	0	0	0	0	0	1	1	0	0	0	0	0	0
1	0	0	1	1	0	0	0	0	0	0	0	1	1	0	1
1	0	0	1	1	0	0	0	0	0	0	0	1	1	0	1
0	0	0	0	0	0	0	0	0	0	1	1	0	1	0	0
0	0	0	0	0	0	0	0	0	0	1	1	0	1	0	0
0	1	0	0	1	0	0	0	0	1	1	0	0	1	0	0
0	1	0	0	1	0	0	1	0	1	1	0	0	0	0	1
0	0	0	0	0	0	0	1	0	0	0	0	0	0	1	0
0	0	0	0	0	0	0	0	0	0	0	0	0	1	1	0
0	0	0	0	0	0	0	0	0	0	0	0	0	1	0	0
0	0	0	0	0	0	0	0	0	0	0	0	0	1	1	0
0	1	0	1	1	0	0	0	0	0	0	0	0	1	1	1
0	1	0	1	1	0	0	0	0	0	0	0	0	1	0	0
0	1	0	1	1	0	0	0	0	0	0	0	0	1	1	0
1	0	0	0	0	0	0	0	0	0	0	0	0	1	0	0
1	0	0	0	0	0	0	0	0	0	0	0	0	1	1	0
1	0	0	0	0	0	0	1	0	0	0	0	0	0	1	0
1	0	0	0	0	0	0	0	0	0	0	0	0	1	1	1
1	0	0	0	0	0	0	0	0	0	0	0	0	1	1	0
1	0	0	0	0	0	0	0	0	0	0	0	0	1	0	0
1	0	0	0	0	0	0	0	0	0	0	0	0	1	1	0
0	0	1	1	1	0	0	1	0	1	0	0	0	0	1	0
0	0	1	1	1	0	0	0	0	1	0	0	0	1	1	1
0	0	1	1	1	0	0	0	0	1	0	0	0	1	0	1
0	0	1	1	1	0	0	0	0	1	0	0	0	1	1	1
0	1	0	1	1	0	0	1	0	0	0	0	0	0	1	0
0	1	0	1	1	0	0	0	0	0	0	0	0	1	1	1
0	1	0	1	1	0	0	0	0	0	0	0	0	1	0	0
0	1	0	1	1	0	0	0	0	0	0	0	0	1	1	1
0	0	0	0	0	0	0	1	0	0	1	0	0	0	1	0
0	0	0	0	0	0	0	0	0	0	1	0	0	1	1	0
0	0	0	0	0	0	0	0	0	0	1	0	0	1	0	0
0	0	0	0	0	0	0	0	0	0	1	0	0	1	1	0
1	0	0	1	1	0	0	1	0	0	0	0	0	0	1	1
1	0	0	1	1	0	0	0	0	0	0	0	0	1	1	1
1	0	0	1	1	0	0	0	0	0	0	0	0	1	0	0
1	0	0	1	1	0	0	0	0	0	0	0	0	1	1	0
0	0	1	0	1	0	0	0	0	0	1	0	0	1	0	0
0	0	1	0	1	0	0	0	0	0	1	0	0	1	1	0
0	0	1	0	1	0	0	1	0	0	1	0	0	0	1	0
0	0	1	0	1	0	0	0	0	0	1	0	0	1	1	0
0	0	1	0	1	0	0	0	0	0	1	0	0	1	1	0
0	0	1	0	1	0	0	0	0	0	1	0	0	1	0	0
0	0	1	0	1	0	0	0	0	0	1	0	0	1	1	0
0	0	0	0	0	0	0	1	0	0	1	0	0	0	1	0
0	0	0	0	0	0	0	0	0	0	1	0	0	1	1	0
0	0	0	0	0	0	0	0	0	0	1	0	0	1	0	0
0	0	0	0	0	0	0	0	0	0	1	0	0	1	1	0
0	0	0	0	1	0	0	0	0	0	0	0	0	1	0	0
0	0	0	0	1	0	0	0	0	0	0	0	0	1	1	0
0	0	0	0	1	0	0	1	0	0	0	0	0	0	1	0
0	0	0	0	1	0	0	0	0	0	0	0	0	1	1	0
0	0	0	0	1	0	0	0	0	0	0	0	0	1	1	0
0	0	0	0	1	0	0	0	0	0	0	0	0	1	0	0
0	0	0	0	1	0	0	0	0	0	0	0	0	1	1	0
0	0	0	0	0	0	0	1	0	0	0	0	0	0	1	0
0	0	0	0	0	0	0	0	0	0	0	0	0	1	1	0
0	0	0	0	0	0	0	0	0	0	0	0	0	1	0	0
0	0	0	0	0	0	0	0	0	0	0	0	0	1	1	0
0	0	0	0	0	0	0	1	0	0	1	0	0	0	1	0
0	0	0	0	0	0	0	0	0	0	1	0	0	1	1	1
0	0	0	0	0	0	0	0	0	0	1	0	0	1	0	1
0	0	0	0	0	0	0	0	0	0	1	0	0	1	1	0
0	0	0	1	1	0	0	1	0	0	1	1	0	0	1	0
0	0	0	1	1	0	0	0	0	0	1	1	0	1	1	0
0	0	0	1	1	0	0	0	0	0	1	1	0	1	0	0
1	0	0	0	1	0	0	0	0	1	1	0	0	1	0	0
1	0	0	0	1	0	0	0	0	1	1	0	0	1	1	0
1	0	0	0	1	0	0	1	0	1	1	0	0	0	1	1
1	0	0	0	1	0	0	0	0	1	1	0	0	1	1	0
1	0	0	0	1	0	0	0	0	1	1	0	0	1	1	0
1	0	0	0	1	0	0	0	0	1	1	0	0	1	0	0
1	0	0	0	1	0	0	0	0	1	1	0	0	1	1	0
0	0	0	0	1	1	1	0	0	0	0	0	0	0	1	1
0	0	0	0	1	1	0	0	0	0	0	0	0	1	0	0
0	0	0	0	1	1	0	1	0	0	0	0	0	0	0	1
0	0	1	0	0	0	0	0	1	0	1	1	0	1	1	0
0	0	1	0	0	0	0	1	1	0	1	1	0	1	0	0
0	0	1	0	0	0	1	0	0	0	1	1	0	0	1	1
0	0	1	0	0	0	0	1	0	0	1	1	0	0	0	1
0	0	1	0	1	0	1	0	0	0	1	0	0	0	1	0
0	0	1	0	1	0	0	0	0	0	1	0	0	1	0	1
0	0	1	0	1	0	0	1	0	0	1	0	0	0	0	0
1	0	0	0	0	0	0	0	1	0	0	0	0	1	1	0
1	0	0	0	0	0	0	1	1	0	0	0	0	1	0	1
1	0	0	0	0	0	1	0	0	0	0	0	0	0	1	0
1	0	0	0	0	0	0	1	0	0	0	0	0	0	0	0
0	0	0	0	0	0	0	0	1	0	1	1	0	1	1	0
0	0	0	0	0	0	0	1	1	0	1	1	0	1	0	0
0	0	0	0	0	0	1	0	0	0	1	1	0	0	1	0
0	0	0	0	0	0	0	1	0	0	1	1	0	0	0	0
0	0	0	0	0	0	1	0	0	0	1	0	0	0	1	0
0	0	0	0	0	0	0	1	0	0	1	0	0	0	0	0
0	0	0	0	1	0	1	0	0	1	0	0	0	0	1	1
0	0	0	0	1	0	0	0	0	1	0	0	0	1	0	0
0	0	0	0	1	0	0	1	0	1	0	0	0	0	0	1
0	0	1	0	1	0	1	0	0	0	0	0	0	0	1	0
0	0	1	0	1	0	0	0	0	0	0	0	0	1	0	1
0	0	1	0	1	0	0	1	0	0	0	0	0	0	0	0
0	1	0	1	1	0	1	0	0	0	0	0	0	0	1	1
0	1	0	1	1	0	0	1	0	0	0	0	0	0	0	1
0	0	1	0	1	0	1	0	0	1	0	1	0	0	1	0
0	0	1	0	1	0	0	0	0	1	0	1	0	1	0	0
0	0	1	0	1	0	0	1	0	1	0	1	0	0	0	0
1	0	0	0	0	0	0	0	1	0	1	0	0	1	1	0
1	0	0	0	0	0	0	1	1	0	1	0	0	1	0	0
1	0	0	0	0	0	1	0	0	0	1	0	0	0	1	1
1	0	0	0	0	0	0	1	0	0	1	0	0	0	0	0
0	0	0	0	0	0	0	0	1	1	0	0	0	1	1	0
0	0	0	0	0	0	0	1	1	1	0	0	0	1	0	0
0	0	0	0	0	0	1	0	0	1	0	0	0	0	1	1
0	0	0	0	0	0	0	1	0	1	0	0	0	0	0	1
0	0	0	1	1	0	1	0	0	0	0	1	0	0	1	0
0	0	0	1	1	0	0	1	0	0	0	1	0	0	0	0
0	0	0	0	0	0	0	0	1	0	1	0	0	1	1	0
0	0	0	0	0	0	0	1	1	0	1	0	0	1	0	0
0	0	0	0	0	0	1	0	0	0	1	0	0	0	1	0
0	0	0	0	0	0	0	1	0	0	1	0	0	0	0	0
0	0	0	0	0	0	0	0	1	0	0	0	0	1	1	0
0	0	0	0	0	0	0	1	1	0	0	0	0	1	0	0
0	0	0	0	0	0	1	0	0	0	0	0	0	0	1	0
0	0	0	0	0	0	0	1	0	0	0	0	0	0	0	0
1	0	0	0	0	0	0	0	1	0	0	1	0	1	1	0
1	0	0	0	0	0	0	1	1	0	0	1	0	1	0	0
1	0	0	0	0	0	1	0	0	0	0	1	0	0	1	0
1	0	0	0	0	0	0	1	0	0	0	1	0	0	0	0
0	0	1	0	1	0	1	0	0	0	1	0	0	0	1	1
0	0	1	0	1	0	0	0	0	0	1	0	0	1	0	0
0	0	1	0	1	0	0	1	0	0	1	0	0	0	0	0
0	0	0	1	1	0	1	0	0	0	0	0	0	0	1	0
0	0	0	1	1	0	0	0	0	0	0	0	0	1	0	0
0	0	0	1	1	0	0	1	0	0	0	0	0	0	0	0
0	0	0	1	1	1	1	0	0	0	1	0	0	0	1	1
0	0	0	1	1	1	0	1	0	0	1	0	0	0	0	1
1	0	0	0	0	0	0	0	1	0	0	0	0	1	1	0
1	0	0	0	0	0	0	1	1	0	0	0	0	1	0	0
1	0	0	0	0	0	1	0	0	0	0	0	0	0	1	1
1	0	0	0	0	0	0	1	0	0	0	0	0	0	0	0
0	0	0	0	1	0	1	0	0	0	0	0	0	0	1	0
0	0	0	0	1	0	0	0	0	0	0	0	0	1	0	0
0	0	0	0	1	0	0	1	0	0	0	0	0	0	0	0
0	0	1	0	0	0	0	0	1	0	0	1	0	1	1	0
0	0	1	0	0	0	0	1	1	0	0	1	0	1	0	0
0	0	1	0	0	0	1	0	0	0	0	1	0	0	1	1
0	0	1	0	0	0	0	1	0	0	0	1	0	0	0	1
0	0	1	1	1	0	1	0	0	1	1	0	0	0	1	1
0	0	1	1	1	0	0	1	0	1	1	0	0	0	0	1
0	1	0	0	0	0	0	0	1	0	1	0	0	1	1	0
0	1	0	0	0	0	0	1	1	0	1	0	0	1	0	0
0	1	0	0	0	0	1	0	0	0	1	0	0	0	1	1
0	1	0	0	0	0	0	1	0	0	1	0	0	0	0	1
0	0	0	0	0	0	0	0	1	0	1	1	0	1	1	1
0	0	0	0	0	0	0	1	1	0	1	1	0	1	0	0
0	0	0	0	0	0	1	0	0	0	1	1	0	0	1	1
0	0	0	0	0	0	0	1	0	0	1	1	0	0	0	1
0	1	0	1	1	0	1	0	0	1	0	0	0	0	1	0
0	1	0	1	1	0	0	1	0	1	0	0	0	0	0	1
0	0	0	0	0	0	0	0	1	0	1	0	0	1	1	0
0	0	0	0	0	0	0	1	1	0	1	0	0	1	0	0
0	0	0	0	0	0	1	0	0	0	1	0	0	0	1	0
0	0	0	0	0	0	0	1	0	0	1	0	0	0	0	0
0	0	0	1	0	0	1	0	0	0	1	0	0	0	1	0
0	0	0	1	0	0	0	0	0	0	1	0	0	1	0	0
0	0	0	1	0	0	0	1	0	0	1	0	0	0	0	0
0	0	0	0	0	0	0	0	1	0	1	0	0	1	1	0
0	0	0	0	0	0	0	1	1	0	1	0	0	1	0	0
0	0	0	1	1	0	1	0	0	0	1	0	0	0	1	1
0	0	0	1	1	0	0	0	0	0	1	0	0	1	0	0
0	0	0	1	1	0	0	1	0	0	1	0	0	0	0	0
0	0	1	0	1	0	1	0	0	0	0	0	0	0	1	0
0	0	1	0	1	0	0	1	0	0	0	0	0	0	0	0
0	0	0	0	0	0	0	0	1	0	1	0	1	1	1	1
0	0	0	0	0	0	0	1	1	0	1	0	1	1	0	1
0	0	0	0	0	0	1	0	0	0	1	0	1	0	1	1
0	0	0	0	0	0	0	1	0	0	1	0	1	0	0	1
0	0	0	0	0	0	1	0	0	1	0	0	0	0	1	0
0	0	0	0	0	0	0	0	0	1	0	0	0	1	0	0
0	0	0	0	0	0	0	1	0	1	0	0	0	0	0	0
0	0	0	0	0	0	1	0	0	1	0	0	0	0	1	0
0	0	0	0	0	0	0	0	0	1	0	0	0	1	0	0
0	0	0	0	0	0	0	1	0	1	0	0	0	0	0	0
0	0	0	1	1	0	1	0	0	0	0	0	0	0	1	0
0	0	0	1	1	0	0	1	0	0	0	0	0	0	0	0
0	0	1	0	1	0	1	0	0	0	0	1	0	0	1	1
0	0	1	0	1	0	0	0	0	0	0	1	0	1	0	1
0	0	1	0	1	0	0	1	0	0	0	1	0	0	0	1
0	0	0	1	1	0	1	0	0	0	1	0	0	0	1	0
0	0	0	1	1	0	0	1	0	0	1	0	0	0	0	0
0	0	1	0	1	0	1	0	0	0	0	0	0	0	1	1
0	0	1	0	1	0	0	0	0	0	0	0	0	1	0	1
0	0	1	0	1	0	0	1	0	0	0	0	0	0	0	0
0	1	0	0	1	0	1	0	0	1	0	0	0	0	1	0
0	1	0	0	1	0	0	0	0	1	0	0	0	1	0	1
0	1	0	0	1	0	0	1	0	1	0	0	0	0	0	1
0	0	0	1	1	1	1	0	0	0	0	0	0	0	1	0
0	0	0	1	1	1	0	1	0	0	0	0	0	0	0	0
1	0	0	0	1	0	1	0	0	0	0	0	0	0	1	0
1	0	0	0	1	0	0	0	0	0	0	0	0	1	0	1
1	0	0	0	1	0	0	1	0	0	0	0	0	0	0	0
0	0	1	1	1	0	1	0	0	0	0	0	0	0	1	1
0	0	1	1	1	0	0	1	0	0	0	0	0	0	0	1
0	0	1	0	1	0	1	0	0	0	1	0	0	0	1	0
0	0	1	0	1	0	0	0	0	0	1	0	0	1	0	1
0	0	1	0	1	0	0	1	0	0	1	0	0	0	0	0
0	0	1	1	0	0	1	0	0	0	1	0	0	0	1	0
0	0	1	1	0	0	0	1	0	0	1	0	0	0	0	0
1	0	0	0	0	0	0	0	1	1	0	0	0	1	1	1
1	0	0	0	0	0	0	1	1	1	0	0	0	1	0	1
1	0	0	0	0	0	1	0	0	1	0	0	0	0	1	1
1	0	0	0	0	0	0	1	0	1	0	0	0	0	0	0
0	0	0	0	1	0	1	0	0	0	0	0	0	0	1	0
0	0	0	0	1	0	0	0	0	0	0	0	0	1	0	0
0	0	0	0	1	0	0	1	0	0	0	0	0	0	0	0
0	0	0	1	1	0	1	0	0	0	1	0	0	0	1	1
0	0	0	1	1	0	0	1	0	0	1	0	0	0	0	1
0	0	0	0	0	0	0	0	1	1	1	0	1	1	1	0
0	0	0	0	0	0	0	1	1	1	1	0	1	1	0	0
0	0	0	0	0	0	1	0	0	1	1	0	1	0	1	0
0	0	0	0	0	0	0	1	0	1	1	0	1	0	0	0
0	0	1	0	0	0	0	0	1	1	0	0	0	1	1	0
0	0	1	0	0	0	0	1	1	1	0	0	0	1	0	0
0	0	1	0	0	0	1	0	0	1	0	0	0	0	1	0
0	0	1	0	0	0	0	1	0	1	0	0	0	0	0	0
1	0	0	0	1	0	1	0	0	1	0	0	0	0	1	1
1	0	0	0	1	0	0	0	0	1	0	0	0	1	0	1
1	0	0	0	1	0	0	1	0	1	0	0	0	0	0	1
0	0	1	1	1	0	1	0	0	0	0	0	0	0	1	1
0	0	1	1	1	0	0	1	0	0	0	0	0	0	0	1
1	0	0	1	1	0	1	0	0	1	0	0	0	0	1	1
1	0	0	1	1	0	0	1	0	1	0	0	0	0	0	1
0	1	0	1	1	0	1	0	0	1	0	0	0	0	1	1
0	1	0	1	1	0	0	1	0	1	0	0	0	0	0	1
0	0	1	0	0	0	0	0	1	1	1	0	0	1	1	0
0	0	1	0	0	0	0	1	1	1	1	0	0	1	0	0
0	0	1	0	0	0	1	0	0	1	1	0	0	0	1	0
0	0	1	0	0	0	0	1	0	1	1	0	0	0	0	0
0	0	0	0	0	0	0	0	1	0	1	0	0	1	1	0
0	0	0	0	0	0	0	1	1	0	1	0	0	1	0	1
0	0	0	0	0	0	1	0	0	0	1	0	0	0	1	0
0	0	0	0	0	0	0	1	0	0	1	0	0	0	0	0
0	1	0	1	1	0	1	0	0	0	0	0	0	0	1	1
0	1	0	1	1	0	0	1	0	0	0	0	0	0	0	1
0	0	0	0	1	0	1	0	0	0	1	1	0	0	1	1
0	0	0	0	1	0	0	0	0	0	1	1	0	1	0	0
0	0	0	0	1	0	0	1	0	0	1	1	0	0	0	0
1	0	0	0	1	0	1	0	0	1	1	0	0	0	1	0
1	0	0	0	1	0	0	0	0	1	1	0	0	1	0	1
1	0	0	0	1	0	0	1	0	1	1	0	0	0	0	1
1	0	0	1	0	0	0	0	1	0	0	0	0	1	1	0
1	0	0	1	0	0	0	1	1	0	0	0	0	1	0	0
1	0	0	1	0	0	1	0	0	0	0	0	0	0	1	1
1	0	0	1	0	0	0	1	0	0	0	0	0	0	0	0
0	0	0	0	1	0	1	0	0	0	0	0	0	0	1	0
0	0	0	0	1	0	0	1	0	0	0	0	0	0	0	0
0	0	0	0	0	0	0	0	1	0	0	1	0	1	1	0
0	0	0	0	0	0	0	1	1	0	0	1	0	1	0	0
0	0	0	0	0	0	1	0	0	0	0	1	0	0	1	0
0	0	0	0	0	0	0	1	0	0	0	1	0	0	0	0
0	0	1	0	0	0	0	0	1	1	1	0	0	1	1	0
0	0	1	0	0	0	0	1	1	1	1	0	0	1	0	0
0	0	1	0	0	0	1	0	0	1	1	0	0	0	1	1
0	0	1	0	0	0	0	1	0	1	1	0	0	0	0	0
0	0	0	1	1	0	1	0	0	0	0	0	0	0	1	0
0	0	0	1	1	0	0	1	0	0	0	0	0	0	0	0
1	0	0	0	1	0	1	0	0	0	0	1	1	0	1	1
1	0	0	0	1	0	0	0	0	0	0	1	1	1	0	1
1	0	0	0	1	0	0	1	0	0	0	1	1	0	0	1
0	0	1	0	0	0	0	0	1	0	1	1	0	1	1	0
0	0	1	0	0	0	0	1	1	0	1	1	0	1	0	0
0	0	1	0	0	0	1	0	0	0	1	1	0	0	1	1
0	0	1	0	0	0	0	1	0	0	1	1	0	0	0	1
0	0	0	0	1	0	1	0	0	0	0	0	0	0	1	0
0	0	0	0	1	0	0	0	0	0	0	0	0	1	0	0
0	0	0	0	1	0	0	1	0	0	0	0	0	0	0	0
0	0	1	0	0	0	0	0	1	1	1	0	0	1	1	0
0	0	1	0	0	0	0	1	1	1	1	0	0	1	0	0
0	0	1	0	0	0	1	0	0	1	1	0	0	0	1	0
0	0	1	0	0	0	0	1	0	1	1	0	0	0	0	0
0	0	0	1	1	0	1	0	0	1	1	0	0	0	1	0
0	0	0	1	1	0	0	1	0	1	1	0	0	0	0	0
0	1	0	1	1	0	1	0	0	1	0	0	1	0	1	1
0	1	0	1	1	0	0	0	0	1	0	0	1	1	0	1
0	1	0	1	1	0	0	1	0	1	0	0	1	0	0	1
0	0	0	0	0	0	0	0	1	0	0	0	0	1	1	0
0	0	0	0	0	0	0	1	1	0	0	0	0	1	0	0
0	0	0	0	0	0	1	0	0	0	0	0	0	0	1	0
0	0	0	0	0	0	0	1	0	0	0	0	0	0	0	0
0	0	0	0	0	0	0	0	1	0	1	0	0	1	1	0
0	0	0	0	0	0	0	1	1	0	1	0	0	1	0	0
0	0	0	0	0	0	1	0	0	0	1	0	0	0	1	0
0	0	0	0	0	0	0	1	0	0	1	0	0	0	0	0
0	0	1	1	1	0	1	0	0	0	1	1	0	0	1	0
0	0	1	1	1	0	0	1	0	0	1	1	0	0	0	0
0	0	1	0	0	0	0	0	1	0	0	1	0	1	1	0
0	0	1	0	0	0	0	1	1	0	0	1	0	1	0	0
0	0	1	0	0	0	1	0	0	0	0	1	0	0	1	1
0	0	1	0	0	0	0	1	0	0	0	1	0	0	0	1
1	0	0	0	0	0	0	0	1	1	1	0	0	1	1	1
1	0	0	0	0	0	0	1	1	1	1	0	0	1	0	1
1	0	0	0	0	0	1	0	0	1	1	0	0	0	1	0
1	0	0	0	0	0	0	1	0	1	1	0	0	0	0	0
0	0	0	0	1	0	1	0	0	0	1	0	0	0	1	0
0	0	0	0	1	0	0	0	0	0	1	0	0	1	0	0
0	0	0	0	1	0	0	1	0	0	1	0	0	0	0	0
0	0	0	0	0	0	0	0	1	0	1	0	0	1	1	0
0	0	0	0	0	0	0	1	1	0	1	0	0	1	0	0
0	0	0	0	0	0	1	0	0	0	1	0	0	0	1	0
0	0	0	0	0	0	0	1	0	0	1	0	0	0	0	0
1	0	0	0	1	0	1	0	0	0	1	0	0	0	1	1
1	0	0	0	1	0	0	0	0	0	1	0	0	1	0	1
1	0	0	0	1	0	0	1	0	0	1	0	0	0	0	0
0	0	0	1	1	0	1	0	0	0	0	0	0	0	1	1
0	0	0	1	1	0	0	1	0	0	0	0	0	0	0	0
0	1	0	1	1	0	1	0	0	0	0	0	0	0	1	1
0	1	0	1	1	0	0	1	0	0	0	0	0	0	0	0
1	0	0	0	1	0	1	0	0	0	0	1	0	0	1	1
1	0	0	0	1	0	0	0	0	0	0	1	0	1	0	0
1	0	0	0	1	0	0	1	0	0	0	1	0	0	0	0
0	0	1	0	1	0	1	0	0	0	1	0	0	0	1	1
0	0	1	0	1	0	0	0	0	0	1	0	0	1	0	1
0	0	1	0	1	0	0	1	0	0	1	0	0	0	0	0
0	0	1	0	0	0	0	0	1	1	1	1	0	1	1	0
0	0	1	0	0	0	0	1	1	1	1	1	0	1	0	0
0	0	1	0	0	0	1	0	0	1	1	1	0	0	1	1
0	0	1	0	0	0	0	1	0	1	1	1	0	0	0	0
1	0	0	1	1	0	1	0	0	0	1	1	0	0	1	0
1	0	0	1	1	0	0	0	0	0	1	1	0	1	0	0
1	0	0	1	1	0	0	1	0	0	1	1	0	0	0	0
0	0	0	0	0	0	0	0	1	0	0	1	0	1	1	0
0	0	0	0	0	0	0	1	1	0	0	1	0	1	0	0
0	0	0	0	0	0	1	0	0	0	0	1	0	0	1	1
0	0	0	0	0	0	0	1	0	0	0	1	0	0	0	0
0	0	1	0	1	0	0	0	0	0	1	0	0	1	0	0
0	0	1	0	1	0	0	0	0	0	1	0	0	1	1	0
0	0	1	0	1	0	0	1	0	0	1	0	0	1	1	0
0	0	1	0	1	0	0	0	0	0	1	0	0	1	1	1
0	0	1	0	1	0	0	0	0	0	1	0	0	1	0	1
0	0	1	0	1	0	0	0	0	0	1	0	0	1	1	0
0	0	0	0	0	0	0	0	0	0	0	0	0	1	0	0
0	0	0	0	0	0	0	1	1	0	0	0	0	0	0	1
0	0	0	0	0	0	0	1	0	0	0	0	0	1	1	0
0	0	0	0	0	0	0	0	0	0	0	0	0	1	0	0
0	0	0	0	0	0	0	0	0	0	0	0	0	1	1	0
0	1	0	1	1	0	0	0	0	1	0	1	0	1	0	1
0	1	0	1	1	0	0	1	0	1	0	1	0	1	1	1
0	1	0	1	1	0	0	0	0	1	0	1	0	1	0	1
0	1	0	1	1	0	0	0	0	1	0	1	0	1	1	1
0	0	1	0	1	0	0	0	0	1	0	0	0	1	0	0
0	0	1	0	1	0	0	0	0	1	0	0	0	1	1	0
0	0	1	0	1	0	0	1	0	1	0	0	0	1	1	1
0	0	1	0	1	0	0	0	0	1	0	0	0	1	1	1
0	0	1	0	1	0	0	0	0	1	0	0	0	1	0	0
0	0	1	0	1	0	0	0	0	1	0	0	0	1	1	0
0	0	0	1	1	0	0	0	0	0	0	1	0	1	0	0
0	0	0	1	1	0	0	1	0	0	0	1	0	1	1	0
0	0	0	1	1	0	0	0	0	0	0	1	0	1	0	0
0	0	0	1	1	0	0	0	0	0	0	1	0	1	1	0
0	0	0	0	0	0	0	0	0	1	1	0	0	1	0	0
0	0	0	0	0	0	0	1	1	1	1	0	0	0	0	1
0	0	0	0	0	0	0	1	0	1	1	0	0	1	1	0
0	0	0	0	0	0	0	0	0	1	1	0	0	1	0	0
0	0	0	0	0	0	0	0	0	1	1	0	0	1	1	0
0	0	1	0	0	0	0	0	0	0	1	0	0	1	0	0
0	0	1	0	0	0	0	1	1	0	1	0	0	0	0	1
0	0	1	0	0	0	0	1	0	0	1	0	0	1	1	0
0	0	1	0	0	0	0	0	0	0	1	0	0	1	0	0
0	0	1	0	0	0	0	0	0	0	1	0	0	1	1	0
0	0	1	1	1	0	0	0	0	0	0	0	0	1	0	0
0	0	1	1	1	0	0	1	0	0	0	0	0	1	1	0
0	0	1	1	1	0	0	0	0	0	0	0	0	1	0	0
0	0	1	1	1	0	0	0	0	0	0	0	0	1	1	0
1	0	0	1	1	0	0	0	0	1	0	0	0	1	0	0
1	0	0	1	1	0	0	1	0	1	0	0	0	1	1	0
1	0	0	1	1	0	0	0	0	1	0	0	0	1	0	1
1	0	0	1	1	0	0	0	0	1	0	0	0	1	1	1
0	0	0	0	0	0	0	0	0	0	0	0	0	1	0	1
0	0	0	0	0	0	0	1	1	0	0	0	0	0	0	1
0	0	0	0	0	0	0	1	0	0	0	0	0	1	1	0
0	0	0	0	0	0	0	0	0	0	0	0	0	1	0	0
0	0	0	0	0	0	0	0	0	0	0	0	0	1	1	0
1	0	0	0	0	0	0	0	0	1	1	0	0	1	0	0
1	0	0	0	0	0	0	1	1	1	1	0	0	0	0	0
1	0	0	0	0	0	0	1	0	1	1	0	0	1	1	1
1	0	0	0	0	0	0	0	0	1	1	0	0	1	0	1
1	0	0	0	0	0	0	0	0	1	1	0	0	1	1	1
0	0	1	0	0	0	0	0	0	0	0	0	0	1	0	1
0	0	1	0	0	0	0	1	1	0	0	0	0	0	0	1
0	0	1	0	0	0	0	1	0	0	0	0	0	1	1	1
0	0	1	0	0	0	0	0	0	0	0	0	0	1	0	1
0	0	1	0	0	0	0	0	0	0	0	0	0	1	1	1
0	0	1	0	1	0	0	0	0	1	1	0	0	1	0	1
0	0	1	0	1	0	0	0	0	1	1	0	0	1	1	1
0	0	1	0	1	0	0	1	1	1	1	0	0	0	0	0
0	0	1	0	1	0	0	1	0	1	1	0	0	1	1	1
0	0	1	0	1	0	0	0	0	1	1	0	0	1	1	1
0	0	1	0	1	0	0	0	0	1	1	0	0	1	0	0
0	0	1	0	1	0	0	0	0	1	1	0	0	1	1	1
0	0	0	1	1	0	0	0	0	0	0	0	0	1	0	0
0	0	0	1	1	0	0	1	0	0	0	0	0	1	1	0
0	0	0	1	1	0	0	0	0	0	0	0	0	1	0	0
0	0	0	1	1	0	0	0	0	0	0	0	0	1	1	0
1	0	0	1	1	0	0	0	0	0	0	0	0	1	0	1
1	0	0	1	1	0	0	1	0	0	0	0	0	1	1	1
1	0	0	1	1	0	0	0	0	0	0	0	0	1	0	0
1	0	0	1	1	0	0	0	0	0	0	0	0	1	1	1
0	0	0	1	1	0	0	0	0	1	0	0	0	1	0	0
0	0	0	1	1	0	0	0	0	1	0	0	0	1	1	0
0	0	0	1	1	0	0	1	0	1	0	0	0	1	1	0
0	0	0	1	1	0	0	0	0	1	0	0	0	1	1	0
0	0	0	1	1	0	0	0	0	1	0	0	0	1	0	0
0	0	0	1	1	0	0	0	0	1	0	0	0	1	1	0
1	0	0	0	0	0	0	0	0	0	0	0	0	1	0	0
1	0	0	0	0	0	0	0	0	0	0	0	0	1	1	1
1	0	0	0	0	0	0	1	0	0	0	0	0	1	1	1
1	0	0	0	0	0	0	0	0	0	0	0	0	1	1	0
1	0	0	0	0	0	0	0	0	0	0	0	0	1	0	1
1	0	0	0	0	0	0	0	0	0	0	0	0	1	1	1
1	0	0	1	1	0	0	0	0	1	0	1	0	1	0	0
1	0	0	1	1	0	0	1	0	1	0	1	0	1	1	0
1	0	0	1	1	0	0	0	0	1	0	1	0	1	0	0
1	0	0	1	1	0	0	0	0	1	0	1	0	1	1	0
0	0	1	0	1	0	0	0	0	0	1	0	0	1	0	1
0	0	1	0	1	0	0	0	0	0	1	0	0	1	1	1
0	0	1	0	1	0	0	1	0	0	1	0	0	1	1	1
0	0	1	0	1	0	0	0	0	0	1	0	0	1	1	1
0	0	1	0	1	0	0	0	0	0	1	0	0	1	0	0
0	0	1	0	1	0	0	0	0	0	1	0	0	1	1	0
0	0	0	1	1	0	0	0	0	0	0	0	1	1	0	1
0	0	0	1	1	0	0	1	0	0	0	0	1	1	1	1
0	0	0	1	1	0	0	0	0	0	0	0	1	1	0	0
0	0	0	1	1	0	0	0	0	0	0	0	1	1	1	0
0	0	0	0	0	0	0	0	0	0	1	0	0	1	0	0
0	0	0	0	0	0	0	1	0	0	1	0	0	1	1	0
0	0	0	0	0	0	0	0	0	0	1	0	0	1	0	0
0	0	0	0	0	0	0	0	0	0	1	0	0	1	1	0
0	0	0	1	0	0	0	0	0	0	1	0	0	1	0	0
0	0	0	1	0	0	0	1	0	0	1	0	0	1	1	0
0	0	0	1	0	0	0	0	0	0	1	0	0	1	0	0
0	0	0	1	0	0	0	0	0	0	1	0	0	1	1	0
0	0	0	1	1	0	0	0	0	0	0	0	0	1	0	1
0	0	0	1	1	0	0	1	0	0	0	0	0	1	1	1
0	0	0	1	1	0	0	0	0	0	0	0	0	1	0	1
0	0	0	1	1	0	0	0	0	0	0	0	0	1	1	1
0	1	0	1	1	0	0	0	0	0	0	0	0	1	0	1
0	1	0	1	1	0	0	1	0	0	0	0	0	1	1	1
0	1	0	1	1	0	0	0	0	0	0	0	0	1	0	1
0	1	0	1	1	0	0	0	0	0	0	0	0	1	1	1
0	0	0	0	0	0	0	0	0	1	1	0	0	1	0	0
0	0	0	0	0	0	0	1	0	1	1	0	0	1	1	0
0	0	0	0	0	0	0	0	0	1	1	0	0	1	0	0
0	0	0	0	0	0	0	0	0	1	1	0	0	1	1	0
0	0	0	1	1	0	0	0	0	0	0	0	0	1	0	1
0	0	0	1	1	0	0	1	0	0	0	0	0	1	1	1
0	0	0	1	1	0	0	0	0	0	0	0	0	1	0	1
0	0	0	1	1	0	0	0	0	0	0	0	0	1	1	1
0	0	1	0	1	0	0	0	0	1	0	0	0	1	0	0
0	0	1	0	1	0	0	1	0	1	0	0	0	1	1	1
0	0	1	0	1	0	0	0	0	1	0	0	0	1	1	0
0	0	1	0	1	0	0	0	0	1	0	0	0	1	0	0
0	0	1	0	1	0	0	0	0	1	0	0	0	1	1	0
0	0	0	0	0	0	0	0	0	0	0	0	0	1	0	0
0	0	0	0	0	0	0	1	1	0	0	0	0	0	0	0
0	0	0	0	0	0	0	1	0	0	0	0	0	1	1	0
0	0	0	0	0	0	0	0	0	0	0	0	0	1	0	0
0	0	0	0	0	0	0	0	0	0	0	0	0	1	1	0
0	0	1	0	0	0	0	0	0	0	0	0	0	1	0	0
0	0	1	0	0	0	0	1	0	0	0	0	0	1	1	0
0	0	1	0	0	0	0	0	0	0	0	0	0	1	0	0
0	0	1	0	0	0	0	0	0	0	0	0	0	1	1	0
0	0	0	0	1	0	0	0	0	0	0	0	0	1	0	1
0	0	0	0	1	0	0	0	0	0	0	0	0	1	1	0
0	0	0	0	1	0	0	1	0	0	0	0	0	1	1	1
0	0	0	0	1	0	0	0	0	0	0	0	0	1	1	0
0	0	0	0	1	0	0	0	0	0	0	0	0	1	0	1
0	0	0	0	1	0	0	0	0	0	0	0	0	1	1	1
0	0	1	0	1	0	0	0	0	0	1	0	0	1	0	1
0	0	1	0	1	0	0	0	0	0	1	0	0	1	1	1
0	0	1	0	1	0	0	1	0	0	1	0	0	1	1	1
0	0	1	0	1	0	0	0	0	0	1	0	0	1	1	1
0	0	1	0	1	0	0	0	0	0	1	0	0	1	0	1
0	0	1	0	1	0	0	0	0	0	1	0	0	1	1	1
0	0	1	0	0	0	0	0	0	0	0	0	0	1	0	1
0	0	1	0	0	0	0	1	1	0	0	0	0	0	0	1
0	0	1	0	0	0	0	1	0	0	0	0	0	1	1	1
0	0	1	0	0	0	0	0	0	0	0	0	0	1	0	0
0	0	1	0	0	0	0	0	0	0	0	0	0	1	1	1
0	0	0	0	0	0	0	0	0	1	1	0	0	1	0	0
0	0	0	0	0	0	0	1	1	1	1	0	0	0	0	0
0	0	0	0	0	0	0	1	0	1	1	0	0	1	1	0
0	0	0	0	0	0	0	0	0	1	1	0	0	1	0	0
0	0	0	0	0	0	0	0	0	1	1	0	0	1	1	0
0	0	1	0	1	0	0	0	0	0	1	0	0	1	0	0
0	0	1	0	1	0	0	0	0	0	1	0	0	1	1	1
0	0	1	0	1	0	0	1	0	0	1	0	0	1	1	0
0	0	1	0	1	0	0	0	0	0	1	0	0	1	1	1
0	0	1	0	1	0	0	0	0	0	1	0	0	1	0	0
0	0	1	0	1	0	0	0	0	0	1	0	0	1	1	0
0	1	0	1	1	0	0	0	0	0	0	0	0	1	0	1
0	1	0	1	1	0	0	1	0	0	0	0	0	1	1	1
0	1	0	1	1	0	0	0	0	0	0	0	0	1	0	1
0	1	0	1	1	0	0	0	0	0	0	0	0	1	1	1
0	0	0	1	0	0	0	0	0	1	0	0	0	1	0	0
0	0	0	1	0	0	0	1	0	1	0	0	0	1	1	0
0	0	0	1	0	0	0	0	0	1	0	0	0	1	0	0
0	0	0	1	0	0	0	0	0	1	0	0	0	1	1	0
0	0	1	0	1	0	0	0	0	0	0	0	0	1	0	1
0	0	1	0	1	0	0	0	0	0	0	0	0	1	1	0
0	0	1	0	1	0	0	1	0	0	0	0	0	1	1	1
0	0	1	0	1	0	0	0	0	0	0	0	0	1	1	0
0	0	1	0	1	0	0	0	0	0	0	0	0	1	0	1
0	0	1	0	1	0	0	0	0	0	0	0	0	1	1	0
0	0	0	1	1	0	0	0	0	0	1	0	0	1	0	1
0	0	0	1	1	0	0	1	0	0	1	0	0	1	1	0
0	0	0	1	1	0	0	0	0	0	1	0	0	1	0	0
0	0	0	1	1	0	0	0	0	0	1	0	0	1	1	0
0	0	0	1	1	0	0	0	0	1	0	0	0	1	0	0
0	0	0	1	1	0	0	1	0	1	0	0	0	1	1	0
0	0	0	1	1	0	0	0	0	1	0	0	0	1	0	0
0	0	0	1	1	0	0	0	0	1	0	0	0	1	1	0
0	0	0	0	0	0	0	0	0	1	1	0	0	1	0	0
0	0	0	0	0	0	0	1	1	1	1	0	0	0	0	1
0	0	0	0	0	0	0	1	0	1	1	0	0	1	1	0
0	0	0	0	0	0	0	0	0	1	1	0	0	1	0	0
0	0	0	0	0	0	0	0	0	1	1	0	0	1	1	0
0	1	0	1	1	0	0	0	0	0	0	0	0	1	0	1
0	1	0	1	1	0	0	1	0	0	0	0	0	1	1	1
0	1	0	1	1	0	0	0	0	0	0	0	0	1	0	1
0	1	0	1	1	0	0	0	0	0	0	0	0	1	1	1
0	0	0	0	1	0	0	0	0	1	0	0	0	1	0	0
0	0	0	0	1	0	0	0	0	1	0	0	0	1	1	0
0	0	0	0	1	0	0	1	0	1	0	0	0	1	1	0
0	0	0	0	1	0	0	0	0	1	0	0	0	1	1	0
0	0	0	0	1	0	0	0	0	1	0	0	0	1	0	0
0	0	0	0	1	0	0	0	0	1	0	0	0	1	1	0
0	1	0	1	1	0	0	0	0	1	1	0	0	1	0	1
0	1	0	1	1	0	0	0	0	1	1	0	0	1	1	1
0	1	0	1	1	0	0	1	0	1	1	0	0	1	1	0
0	1	0	1	1	0	0	0	0	1	1	0	0	1	1	0
0	1	0	1	1	0	0	0	0	1	1	0	0	1	0	1
0	1	0	1	1	0	0	0	0	1	1	0	0	1	1	1
1	0	0	0	1	0	0	0	0	0	1	0	0	1	0	1
1	0	0	0	1	0	0	0	0	0	1	0	0	1	1	1
1	0	0	0	1	0	0	1	0	0	1	0	0	1	1	1
1	0	0	0	1	0	0	0	0	0	1	0	0	1	1	0
1	0	0	0	1	0	0	0	0	0	1	0	0	1	0	0
1	0	0	0	1	0	0	0	0	0	1	0	0	1	1	1
0	0	1	1	1	0	0	0	0	0	0	0	0	1	0	1
0	0	1	1	1	0	0	1	0	0	0	0	0	1	1	1
0	0	1	1	1	0	0	0	0	0	0	0	0	1	0	1
0	0	1	1	1	0	0	0	0	0	0	0	0	1	1	1
0	0	1	0	1	0	0	0	0	0	1	0	0	1	0	1
0	0	1	0	1	0	0	1	0	0	1	0	0	1	1	0
0	0	1	0	1	0	0	0	0	0	1	0	0	1	0	0
0	0	1	0	1	0	0	0	0	0	1	0	0	1	1	1
0	0	0	0	1	0	0	0	0	0	0	0	0	1	0	0
0	0	0	0	1	0	0	0	0	0	0	0	0	1	1	0
0	0	0	0	1	0	0	1	0	0	0	0	0	1	1	0
0	0	0	0	1	0	0	0	0	0	0	0	0	1	1	0
0	0	0	0	1	0	0	0	0	0	0	0	0	1	0	0
0	0	0	0	1	0	0	0	0	0	0	0	0	1	1	0
0	0	1	1	1	0	0	0	0	0	1	0	1	1	0	0
0	0	1	1	1	0	0	1	0	0	1	0	1	1	1	0
0	0	1	1	1	0	0	0	0	0	1	0	1	1	0	0
0	0	1	1	1	0	0	0	0	0	1	0	1	1	1	0
0	0	0	1	1	0	0	0	0	0	0	0	0	1	0	1
0	0	0	1	1	0	0	1	0	0	0	0	0	1	1	1
0	0	0	1	1	0	0	0	0	0	0	0	0	1	0	0
0	0	0	1	1	0	0	0	0	0	0	0	0	1	1	0
0	0	0	0	1	0	0	0	0	1	1	0	0	1	0	0
0	0	0	0	1	0	0	0	0	1	1	0	0	1	1	0
0	0	0	0	1	0	0	1	0	1	1	0	0	1	1	0
0	0	0	0	1	0	0	0	0	1	1	0	0	1	1	0
0	0	0	0	1	0	0	0	0	1	1	0	0	1	0	0
0	0	0	0	1	0	0	0	0	1	1	0	0	1	1	0
0	0	0	0	0	0	0	0	0	0	1	0	0	1	0	0
0	0	0	0	0	0	0	1	0	0	1	0	0	1	1	0
0	0	0	0	0	0	0	0	0	0	1	0	0	1	0	0
0	0	0	0	0	0	0	0	0	0	1	0	0	1	1	0
0	1	0	1	1	0	0	0	0	0	0	0	0	1	0	1
0	1	0	1	1	0	0	1	0	0	0	0	0	1	1	1
0	1	0	1	1	0	0	0	0	0	0	0	0	1	0	1
0	1	0	1	1	0	0	0	0	0	0	0	0	1	1	1
0	0	1	0	1	0	0	0	0	1	0	1	0	1	0	0
0	0	1	0	1	0	0	0	0	1	0	1	0	1	1	0
0	0	1	0	1	0	0	1	0	1	0	1	0	1	1	0
0	0	1	0	1	0	0	0	0	1	0	1	0	1	1	0
0	0	1	0	1	0	0	0	0	1	0	1	0	1	0	0
0	0	1	0	1	0	0	0	0	1	0	1	0	1	1	0
0	0	0	1	0	0	0	0	0	0	1	0	0	1	0	0
0	0	0	1	0	0	0	1	0	0	1	0	0	1	1	0
0	0	0	1	0	0	0	0	0	0	1	0	0	1	0	1
0	0	0	1	0	0	0	0	0	0	1	0	0	1	1	0
0	0	0	1	1	0	0	0	0	1	1	0	0	1	0	0
0	0	0	1	1	0	0	1	0	1	1	0	0	1	1	0
0	0	0	1	1	0	0	0	0	1	1	0	0	1	0	0
0	0	0	1	1	0	0	0	0	1	1	0	0	1	1	0
1	0	0	0	0	0	0	0	0	1	1	1	0	1	0	1
1	0	0	0	0	0	0	1	1	1	1	1	0	0	0	1
1	0	0	0	0	0	0	1	0	1	1	1	0	1	1	1
1	0	0	0	0	0	0	0	0	1	1	1	0	1	0	1
1	0	0	0	0	0	0	0	0	1	1	1	0	1	1	1
0	0	0	0	1	0	0	0	0	0	1	0	0	1	0	0
0	0	0	0	1	0	0	0	0	0	1	0	0	1	1	0
0	0	0	0	1	0	0	1	0	0	1	0	0	1	1	0
0	0	0	0	1	0	0	0	0	0	1	0	0	1	1	0
0	0	0	0	1	0	0	0	0	0	1	0	0	1	0	0
0	0	0	0	1	0	0	0	0	0	1	0	0	1	1	0
0	0	1	0	1	0	0	0	0	0	0	0	0	1	0	1
0	0	1	0	1	0	0	0	0	0	0	0	0	1	1	1
0	0	1	0	1	0	0	1	0	0	0	0	0	1	1	1
0	0	1	0	1	0	0	0	0	0	0	0	0	1	1	1
0	0	1	0	1	0	0	0	0	0	0	0	0	1	0	1
0	0	1	0	1	0	0	0	0	0	0	0	0	1	1	1
0	0	0	0	0	0	0	0	0	1	0	0	0	1	0	0
0	0	0	0	0	0	0	1	1	1	0	0	0	0	0	1
0	0	0	0	0	0	0	1	0	1	0	0	0	1	1	0
0	0	0	0	0	0	0	0	0	1	0	0	0	1	0	0
0	0	0	0	0	0	0	0	0	1	0	0	0	1	1	0
0	0	0	0	0	0	0	0	0	0	1	0	0	1	0	1
0	0	0	0	0	0	0	1	0	0	1	0	0	1	1	1
0	0	0	0	0	0	0	0	0	0	1	0	0	1	0	1
0	0	0	0	0	0	0	0	0	0	1	0	0	1	1	1
0	0	1	0	1	0	0	0	0	0	1	0	0	1	0	0
0	0	1	0	1	0	0	0	0	0	1	0	0	1	1	1
0	0	1	0	1	0	0	1	0	0	1	0	0	1	1	0
0	0	1	0	1	0	0	0	0	0	1	0	0	1	1	0
0	0	1	0	1	0	0	0	0	0	1	0	0	1	0	0
0	0	1	0	1	0	0	0	0	0	1	0	0	1	1	0
0	0	0	0	1	0	0	0	0	0	1	0	0	1	0	0
0	0	0	0	1	0	0	0	0	0	1	0	0	1	1	0
0	0	0	0	1	0	0	1	0	0	1	0	0	1	1	0
0	0	0	0	1	0	0	0	0	0	1	0	0	1	1	0
0	0	0	0	1	0	0	0	0	0	1	0	0	1	0	0
0	0	0	0	1	0	0	0	0	0	1	0	0	1	1	0
0	0	0	0	0	0	0	0	0	1	1	1	0	1	0	0
0	0	0	0	0	0	0	1	1	1	1	1	0	0	0	0
0	0	0	0	0	0	0	1	0	1	1	1	0	1	1	0
0	0	0	0	0	0	0	0	0	1	1	1	0	1	0	0
0	0	0	0	0	0	0	0	0	1	1	1	0	1	1	0
0	0	0	1	0	0	0	0	0	1	1	0	0	1	0	0
0	0	0	1	0	0	0	1	0	1	1	0	0	1	1	0
0	0	0	1	0	0	0	0	0	1	1	0	0	1	0	0
0	0	0	1	0	0	0	0	0	1	1	0	0	1	1	0
0	0	0	0	0	0	0	0	0	1	1	0	0	1	0	0
0	0	0	0	0	0	0	1	1	1	1	0	0	0	0	0
0	0	0	0	0	0	0	1	0	1	1	0	0	1	1	0
0	0	0	0	0	0	0	0	0	1	1	0	0	1	0	1
0	0	0	0	0	0	0	0	0	1	1	0	0	1	1	0
0	0	0	0	0	0	0	0	0	0	1	0	0	1	0	0
0	0	0	0	0	0	0	1	1	0	1	0	0	0	0	0
0	0	0	0	0	0	0	1	0	0	1	0	0	1	1	0
0	0	0	0	0	0	0	0	0	0	1	0	0	1	0	0
0	0	0	0	0	0	0	0	0	0	1	0	0	1	1	0
1	0	0	1	0	0	0	0	0	0	0	0	0	1	0	0
1	0	0	1	0	0	0	1	0	0	0	0	0	1	1	1
1	0	0	1	0	0	0	0	0	0	0	0	0	1	0	1
1	0	0	1	0	0	0	0	0	0	0	0	0	1	1	1
1	0	0	0	1	0	0	0	0	0	1	1	0	1	0	0
1	0	0	0	1	0	0	0	0	0	1	1	0	1	1	0
1	0	0	0	1	0	0	1	0	0	1	1	0	1	1	0
1	0	0	0	1	0	0	0	0	0	1	1	0	1	1	0
1	0	0	0	1	0	0	0	0	0	1	1	0	1	0	0
1	0	0	0	1	0	0	0	0	0	1	1	0	1	1	0
0	0	1	0	1	0	0	0	0	0	1	0	0	1	0	0
0	0	1	0	1	0	0	0	0	0	1	0	0	1	1	0
0	0	1	0	1	0	0	1	0	0	1	0	0	1	1	0
0	0	1	0	1	0	0	0	0	0	1	0	0	1	1	0
0	0	1	0	1	0	0	0	0	0	1	0	0	1	0	0
0	0	1	0	1	0	0	0	0	0	1	0	0	1	1	0
1	0	0	1	1	0	0	0	0	0	1	0	1	1	0	1
1	0	0	1	1	0	0	1	0	0	1	0	1	1	1	1
1	0	0	1	1	0	0	0	0	0	1	0	1	1	0	1
1	0	0	1	1	0	0	0	0	0	1	0	1	1	1	1
0	0	0	0	0	0	0	0	0	1	1	0	0	1	0	0
0	0	0	0	0	0	0	1	1	1	1	0	0	0	0	0
0	0	0	0	0	0	0	1	0	1	1	0	0	1	1	0
0	0	0	0	0	0	0	0	0	1	1	0	0	1	0	0
0	0	0	0	0	0	0	0	0	1	1	0	0	1	1	0
1	0	0	0	1	0	0	0	0	0	1	1	0	1	0	0
1	0	0	0	1	0	0	1	0	0	1	1	0	1	1	1
1	0	0	0	1	0	0	0	0	0	1	1	0	1	0	0
1	0	0	0	1	0	0	0	0	0	1	1	0	1	1	1
1	0	0	1	1	0	0	0	0	0	0	0	0	1	0	0
1	0	0	1	1	0	0	1	0	0	0	0	0	1	1	0
1	0	0	1	1	0	0	0	0	0	0	0	0	1	0	0
1	0	0	1	1	0	0	0	0	0	0	0	0	1	1	0
0	0	0	0	0	0	0	0	0	0	1	0	0	1	0	0
0	0	0	0	0	0	0	1	1	0	1	0	0	0	0	0
0	0	0	0	0	0	0	1	0	0	1	0	0	1	1	0
0	0	0	0	0	0	0	0	0	0	1	0	0	1	0	0
0	0	0	0	0	0	0	0	0	0	1	0	0	1	1	0
0	0	0	0	0	0	0	0	0	1	1	0	0	1	0	0
0	0	0	0	0	0	0	1	0	1	1	0	0	1	1	0
0	0	0	0	0	0	0	0	0	1	1	0	0	1	0	0
0	0	0	0	0	0	0	0	0	1	1	0	0	1	1	0
0	1	0	1	0	0	0	0	0	0	0	0	1	1	0	1
0	1	0	1	0	0	0	1	0	0	0	0	1	1	1	1
0	1	0	1	0	0	0	0	0	0	0	0	1	1	0	1
0	1	0	1	0	0	0	0	0	0	0	0	1	1	1	0
0	0	1	0	0	0	0	0	0	1	1	0	0	1	0	0
0	0	1	0	0	0	0	1	1	1	1	0	0	0	0	1
0	0	1	0	0	0	0	1	0	1	1	0	0	1	1	0
0	0	1	0	0	0	0	0	0	1	1	0	0	1	0	0
0	0	1	0	0	0	0	0	0	1	1	0	0	1	1	0
0	0	0	0	0	0	0	1	1	0	1	0	0	0	0	0
0	0	1	0	0	0	0	0	0	1	1	0	0	1	0	0
0	0	1	0	0	0	0	1	0	1	1	0	0	1	1	0
0	0	1	0	0	0	0	0	0	1	1	0	0	1	0	0
0	0	1	0	0	0	0	0	0	1	1	0	0	1	1	0
0	0	0	1	1	0	0	0	0	0	0	0	0	1	0	0
0	0	0	1	1	0	0	1	0	0	0	0	0	1	1	0
0	0	0	1	1	0	0	0	0	0	0	0	0	1	0	0
0	0	0	1	1	0	0	0	0	0	0	0	0	1	1	0
0	0	1	0	1	0	0	0	0	1	0	0	0	1	0	0
0	0	1	0	1	0	0	0	0	1	0	0	0	1	1	1
0	0	1	0	1	0	0	1	0	1	0	0	0	1	1	0
0	0	1	0	1	0	0	0	0	1	0	0	0	1	1	0
0	0	1	0	1	0	0	0	0	1	0	0	0	1	0	0
0	0	1	0	1	0	0	0	0	1	0	0	0	1	1	0
0	0	0	0	0	0	0	0	0	0	1	0	0	1	0	0
0	0	0	0	0	0	0	1	1	0	1	0	0	0	0	0
0	0	0	0	0	0	0	1	0	0	1	0	0	1	1	0
0	0	0	0	0	0	0	0	0	0	1	0	0	1	0	0
0	0	0	0	0	0	0	0	0	0	1	0	0	1	1	0
0	0	1	1	0	0	0	0	0	0	1	0	0	1	0	0
0	0	1	1	0	0	0	1	1	0	1	0	0	0	0	1
0	0	1	1	0	0	0	1	0	0	1	0	0	1	1	1
0	0	1	1	0	0	0	0	0	0	1	0	0	1	0	0
0	0	1	1	0	0	0	0	0	0	1	0	0	1	1	1
0	0	0	0	0	0	0	0	0	0	1	0	0	1	0	0
0	0	0	0	0	0	0	1	0	0	1	0	0	1	1	0
0	0	0	0	0	0	0	0	0	0	1	0	0	1	0	0
0	0	0	0	0	0	0	0	0	0	1	0	0	1	1	0
0	0	1	0	0	0	0	0	0	1	1	1	1	1	0	0
0	0	1	0	0	0	0	0	0	1	1	1	1	1	1	0
0	0	1	0	1	0	0	0	0	0	1	1	0	1	0	0
0	0	1	0	1	0	0	0	0	0	1	1	0	1	1	0
0	0	1	0	1	0	0	1	0	0	1	1	0	1	1	1
0	0	1	0	1	0	0	0	0	0	1	1	0	1	1	1
0	0	1	0	1	0	0	0	0	0	1	1	0	1	0	0
0	0	1	0	1	0	0	0	0	0	1	1	0	1	1	0
0	0	0	1	1	0	1	0	0	0	1	0	0	1	0	1
0	0	0	1	1	0	1	0	0	0	1	0	0	0	1	1
0	0	0	1	1	0	0	0	0	0	1	0	0	1	1	1
0	0	0	1	1	0	0	0	0	0	1	0	0	1	0	0
0	0	0	1	1	1	1	0	0	1	1	1	1	1	0	0
0	0	0	1	1	1	1	0	0	1	1	1	1	0	1	0
0	0	0	1	1	1	0	0	0	1	1	1	1	1	1	0
0	0	0	1	1	1	0	0	0	1	1	1	1	1	0	0
0	0	0	0	1	0	0	1	0	0	1	1	0	0	1	0
1	0	0	1	1	0	1	0	0	1	0	0	0	1	0	1
1	0	0	1	1	0	1	0	0	1	0	0	0	0	1	1
1	0	0	1	1	0	0	0	0	1	0	0	0	1	1	1
1	0	0	1	1	0	0	0	0	1	0	0	0	1	0	1
1	0	0	1	1	0	0	1	1	0	0	0	1	1	0	1
1	0	0	1	1	0	1	0	0	0	0	0	1	1	0	1
1	0	0	1	1	0	1	0	0	0	0	0	1	0	1	1
1	0	0	1	1	0	0	0	0	0	0	0	1	1	1	1
1	0	0	1	1	0	0	1	0	0	0	0	1	0	1	1
1	0	0	1	1	0	0	0	0	0	0	0	1	0	0	1
1	0	0	1	1	0	0	0	0	0	0	0	1	1	0	0
0	0	0	0	1	0	1	0	0	0	1	0	0	1	0	0
0	0	0	0	1	0	1	0	0	0	1	0	0	0	1	0
0	0	0	0	1	0	0	0	0	0	1	0	0	1	1	0
0	0	0	0	1	0	0	1	0	0	1	0	0	0	1	0
0	0	0	0	1	0	0	0	0	0	1	0	0	1	0	0
1	0	0	0	1	0	1	0	0	1	1	0	0	1	0	1
1	0	0	0	1	0	1	0	0	1	1	0	0	0	1	1
1	0	0	0	1	0	0	0	0	1	1	0	0	1	1	0
1	0	0	0	1	0	0	1	0	1	1	0	0	0	1	1
1	0	0	0	1	0	0	0	0	1	1	0	0	1	0	1
1	0	0	0	0	0	0	1	1	0	0	0	0	1	0	0
1	0	0	0	0	0	1	0	0	0	0	0	0	1	0	1
1	0	0	0	0	0	1	0	0	0	0	0	0	0	1	1
1	0	0	0	0	0	0	0	0	0	0	0	0	1	1	0
1	0	0	0	0	0	0	0	0	0	0	0	0	0	0	0
1	0	0	0	0	0	0	0	0	0	0	0	0	1	0	1
0	0	0	0	0	0	0	1	1	0	1	0	0	1	0	0
0	0	0	0	0	0	1	0	0	0	1	0	0	1	0	0
0	0	0	0	0	0	1	0	0	0	1	0	0	0	1	0
0	0	0	0	0	0	0	0	0	0	1	0	0	1	1	0
0	0	0	0	0	0	0	0	0	0	1	0	0	0	0	0
0	0	0	0	0	0	0	0	0	0	1	0	0	1	0	0
0	0	1	1	1	0	1	0	0	0	0	0	0	1	0	1
0	0	1	1	1	0	1	0	0	0	0	0	0	0	1	1
0	0	1	1	1	0	0	0	0	0	0	0	0	1	1	1
0	0	1	1	1	0	0	0	0	0	0	0	0	1	0	1
0	0	1	1	1	0	1	0	0	0	1	0	0	1	0	1
0	0	1	1	1	0	1	0	0	0	1	0	0	0	1	1
0	0	1	1	1	0	0	0	0	0	1	0	0	1	1	0
0	0	1	1	1	0	0	0	0	0	1	0	0	1	0	0
1	0	0	1	1	0	1	0	0	0	1	0	0	1	0	1
1	0	0	1	1	0	1	0	0	0	1	0	0	0	1	1
1	0	0	1	1	0	0	0	0	0	1	0	0	1	1	1
1	0	0	1	1	0	0	0	0	0	1	0	0	1	0	1
1	0	0	1	1	0	1	0	0	1	0	0	1	1	0	0
1	0	0	1	1	0	1	0	0	1	0	0	1	0	1	0
1	0	0	1	1	0	0	0	0	1	0	0	1	1	1	1
1	0	0	1	1	0	0	0	0	1	0	0	1	1	0	1
0	0	0	0	0	0	0	1	1	1	1	0	0	1	0	0
0	0	0	0	0	0	1	0	0	1	1	0	0	1	0	0
0	0	0	0	0	0	1	0	0	1	1	0	0	0	1	0
0	0	0	0	0	0	0	0	0	1	1	0	0	1	1	0
0	0	0	0	0	0	0	0	0	1	1	0	0	0	0	0
0	0	0	0	0	0	0	0	0	1	1	0	0	1	0	0
1	0	0	0	0	0	1	0	0	1	0	0	1	1	0	1
1	0	0	0	0	0	1	0	0	1	0	0	1	0	1	1
1	0	0	0	0	0	0	0	0	1	0	0	1	1	1	1
1	0	0	0	0	0	0	0	0	1	0	0	1	1	0	1
0	0	0	1	1	0	1	0	0	1	0	0	0	1	0	0
0	0	0	1	1	0	1	0	0	1	0	0	0	0	1	0
0	0	0	1	1	0	0	0	0	1	0	0	0	1	1	0
0	0	0	1	1	0	0	0	0	1	0	0	0	1	0	0
1	0	0	1	1	0	1	0	0	1	0	0	0	1	0	1
1	0	0	1	1	0	1	0	0	1	0	0	0	0	1	1
1	0	0	1	1	0	0	0	0	1	0	0	0	1	1	1
1	0	0	1	1	0	0	0	0	1	0	0	0	1	0	1
0	0	1	0	0	0	0	1	1	0	1	1	0	1	0	0
0	0	1	0	0	0	1	0	0	0	1	1	0	1	0	0
0	0	1	0	0	0	1	0	0	0	1	1	0	0	1	0
0	0	1	0	0	0	0	0	0	0	1	1	0	1	1	0
0	0	1	0	0	0	0	0	0	0	1	1	0	0	0	1
0	0	1	0	0	0	0	0	0	0	1	1	0	1	0	0
0	0	0	0	0	0	1	0	0	0	1	0	0	1	0	0
0	0	0	0	0	0	1	0	0	0	1	0	0	0	1	0
0	0	0	0	0	0	0	0	0	0	1	0	0	1	1	0
0	0	0	0	0	0	0	0	0	0	1	0	0	1	0	1
0	0	1	1	1	0	1	0	0	0	0	0	0	1	0	1
0	0	1	1	1	0	1	0	0	0	0	0	0	0	1	1
0	0	1	1	1	0	0	0	0	0	0	0	0	1	1	1
0	0	1	1	1	0	0	0	0	0	0	0	0	1	0	1
0	0	0	0	1	0	1	0	0	0	0	0	0	1	0	0
0	0	0	0	1	0	1	0	0	0	0	0	0	0	1	0
0	0	0	0	1	0	0	0	0	0	0	0	0	1	1	0
0	0	0	0	1	0	0	1	0	0	0	0	0	0	1	0
0	0	0	0	1	0	0	0	0	0	0	0	0	1	0	0
0	0	1	0	0	0	0	1	1	0	1	0	0	1	0	0
0	0	1	0	0	0	1	0	0	0	1	0	0	1	0	0
0	0	1	0	0	0	1	0	0	0	1	0	0	0	1	0
0	0	1	0	0	0	0	0	0	0	1	0	0	1	1	0
0	0	1	0	0	0	0	0	0	0	1	0	0	0	0	0
0	0	1	0	0	0	0	0	0	0	1	0	0	1	0	0
1	0	0	1	1	0	1	0	0	1	0	0	0	1	0	1
1	0	0	1	1	0	1	0	0	1	0	0	0	0	1	1
1	0	0	1	1	0	0	0	0	1	0	0	0	1	1	1
1	0	0	1	1	0	0	0	0	1	0	0	0	1	0	1
1	0	0	1	1	0	1	0	0	0	0	0	0	1	0	1
1	0	0	1	1	0	1	0	0	0	0	0	0	0	1	1
1	0	0	1	1	0	0	0	0	0	0	0	0	1	1	0
1	0	0	1	1	0	0	0	0	0	0	0	0	1	0	0
0	1	0	0	1	0	1	0	0	0	0	0	0	1	0	0
0	1	0	0	1	0	1	0	0	0	0	0	0	0	1	0
0	1	0	0	1	0	0	0	0	0	0	0	0	1	1	0
0	1	0	0	1	0	0	1	0	0	0	0	0	0	1	0
0	1	0	0	1	0	0	0	0	0	0	0	0	1	0	0
0	0	0	1	0	0	1	0	0	1	1	0	0	1	0	0
0	0	0	1	0	0	1	0	0	1	1	0	0	0	1	0
0	0	0	1	0	0	0	0	0	1	1	0	0	1	1	0
0	0	0	1	0	0	0	0	0	1	1	0	0	1	0	0
0	0	1	1	1	0	1	0	0	0	0	0	0	1	0	1
0	0	1	1	1	0	1	0	0	0	0	0	0	0	1	1
0	0	1	1	1	0	0	0	0	0	0	0	0	1	1	0
0	0	1	1	1	0	0	0	0	0	0	0	0	1	0	1
0	0	0	0	0	0	0	1	1	0	1	0	0	1	0	0
0	0	0	0	0	0	1	0	0	0	1	0	0	1	0	0
0	0	0	0	0	0	1	0	0	0	1	0	0	0	1	0
0	0	0	0	0	0	0	0	0	0	1	0	0	1	1	0
0	0	0	0	0	0	0	0	0	0	1	0	0	0	0	0
0	0	0	0	0	0	0	0	0	0	1	0	0	1	0	0
0	0	1	0	1	0	1	0	0	0	0	1	0	1	0	1
0	0	1	0	1	0	1	0	0	0	0	1	0	0	1	1
0	0	1	0	1	0	0	0	0	0	0	1	0	1	1	1
0	0	1	0	1	0	0	1	0	0	0	1	0	0	1	1
0	0	1	0	1	0	0	0	0	0	0	1	0	1	0	1
1	0	0	0	1	0	1	0	0	0	0	0	0	1	0	1
1	0	0	0	1	0	1	0	0	0	0	0	0	0	1	1
1	0	0	0	1	0	0	0	0	0	0	0	0	1	1	1
1	0	0	0	1	0	0	1	0	0	0	0	0	0	1	0
1	0	0	0	1	0	0	0	0	0	0	0	0	1	0	1
1	0	0	0	1	0	1	0	0	1	0	0	1	1	0	0
1	0	0	0	1	0	1	0	0	1	0	0	1	0	1	1
1	0	0	0	1	0	0	0	0	1	0	0	1	1	1	1
1	0	0	0	1	0	0	1	0	1	0	0	1	0	1	0
1	0	0	0	1	0	0	0	0	1	0	0	1	1	0	1
0	0	0	0	0	0	0	1	1	0	1	0	1	1	0	0
0	0	0	0	0	0	1	0	0	0	1	0	1	1	0	1
0	0	0	0	0	0	1	0	0	0	1	0	1	0	1	1
0	0	0	0	0	0	0	0	0	0	1	0	1	1	1	0
0	0	0	0	0	0	0	0	0	0	1	0	1	0	0	0
0	0	0	0	0	0	0	0	0	0	1	0	1	1	0	0
1	0	0	0	1	0	1	0	0	1	1	0	0	1	0	1
1	0	0	0	1	0	1	0	0	1	1	0	0	0	1	1
1	0	0	0	1	0	0	0	0	1	1	0	0	1	1	0
1	0	0	0	1	0	0	1	0	1	1	0	0	0	1	1
1	0	0	0	1	0	0	0	0	1	1	0	0	1	0	0
0	0	0	1	1	1	1	0	0	0	1	0	0	1	0	1
0	0	0	1	1	1	1	0	0	0	1	0	0	0	1	1
0	0	0	1	1	1	0	0	0	0	1	0	0	1	1	0
0	0	0	1	1	1	0	0	0	0	1	0	0	1	0	0
0	0	0	1	1	0	1	0	0	0	0	0	0	1	0	1
0	0	0	1	1	0	1	0	0	0	0	0	0	0	1	1
0	0	0	1	1	0	0	0	0	0	0	0	0	1	1	0
0	0	0	1	1	0	0	0	0	0	0	0	0	1	0	1
0	0	0	0	0	0	0	1	1	1	0	0	0	1	0	0
0	0	0	0	0	0	0	0	0	1	0	0	0	0	0	0
1	0	0	0	0	0	0	1	1	1	0	1	0	1	0	0
1	0	0	0	0	0	1	0	0	1	0	1	0	1	0	1
1	0	0	0	0	0	1	0	0	1	0	1	0	0	1	1
1	0	0	0	0	0	0	0	0	1	0	1	0	1	1	1
1	0	0	0	0	0	0	0	0	1	0	1	0	0	0	1
1	0	0	0	0	0	0	0	0	1	0	1	0	1	0	0
0	0	0	0	1	0	1	0	0	1	0	0	0	1	0	1
0	0	0	0	1	0	1	0	0	1	0	0	0	0	1	1
0	0	0	0	1	0	0	0	0	1	0	0	0	1	1	1
0	0	0	0	1	0	0	1	0	1	0	0	0	0	1	1
0	0	0	0	1	0	0	0	0	1	0	0	0	1	0	1
0	0	0	1	1	0	1	0	0	0	1	0	0	1	0	1
0	0	0	1	1	0	1	0	0	0	1	0	0	0	1	1
0	0	0	1	1	0	0	0	0	0	1	0	0	1	1	1
0	0	0	1	1	0	0	0	0	0	1	0	0	1	0	0
0	0	1	0	0	0	0	1	1	0	0	0	0	1	0	1
0	0	1	0	0	0	1	0	0	0	0	0	0	1	0	1
0	0	1	0	0	0	1	0	0	0	0	0	0	0	1	1
0	0	1	0	0	0	0	0	0	0	0	0	0	1	1	1
0	0	1	0	0	0	0	0	0	0	0	0	0	0	0	1
0	0	1	0	0	0	0	0	0	0	0	0	0	1	0	1
0	0	1	1	1	0	1	0	0	0	0	0	0	1	0	1
0	0	1	1	1	0	1	0	0	0	0	0	0	0	1	1
0	0	1	1	1	0	0	0	0	0	0	0	0	1	1	1
0	0	1	1	1	0	0	0	0	0	0	0	0	1	0	1
0	0	1	0	0	0	0	1	1	1	1	1	0	1	0	1
0	0	1	0	0	0	1	0	0	1	1	1	0	1	0	1
0	0	1	0	0	0	1	0	0	1	1	1	0	0	1	1
0	0	1	0	0	0	0	0	0	1	1	1	0	1	1	1
0	0	1	0	0	0	0	1	0	1	1	1	0	0	1	1
0	0	1	0	0	0	0	0	0	1	1	1	0	0	0	0
0	0	1	0	0	0	0	0	0	1	1	1	0	1	0	0
0	0	0	0	0	0	0	1	1	1	1	0	0	1	0	0
0	0	0	0	0	0	1	0	0	1	1	0	0	1	0	0
0	0	0	0	0	0	1	0	0	1	1	0	0	0	1	0
0	0	0	0	0	0	0	0	0	1	1	0	0	1	1	0
0	0	0	0	0	0	0	0	0	1	1	0	0	0	0	0
0	0	0	0	0	0	0	0	0	1	1	0	0	1	0	0
0	0	0	1	1	1	1	0	0	0	1	0	0	1	0	1
0	0	0	1	1	1	1	0	0	0	1	0	0	0	1	1
0	0	0	1	1	1	0	0	0	0	1	0	0	1	1	1
0	0	0	1	1	1	0	0	0	0	1	0	0	1	0	1
1	0	0	0	1	0	1	0	0	1	1	0	0	1	0	1
1	0	0	0	1	0	1	0	0	1	1	0	0	0	1	1
1	0	0	0	1	0	0	0	0	1	1	0	0	1	1	0
1	0	0	0	1	0	0	1	0	1	1	0	0	0	1	1
1	0	0	0	1	0	0	0	0	1	1	0	0	1	0	0
0	0	1	1	1	0	1	0	0	0	1	0	0	1	0	1
0	0	1	1	1	0	1	0	0	0	1	0	0	0	1	1
0	0	1	1	1	0	0	0	0	0	1	0	0	1	1	0
0	0	1	1	1	0	0	0	0	0	1	0	0	1	0	0
0	0	1	0	0	0	0	1	1	0	1	0	0	1	0	1
0	0	1	0	0	0	1	0	0	0	1	0	0	1	0	0
0	0	1	0	0	0	1	0	0	0	1	0	0	0	1	0
0	0	1	0	0	0	0	0	0	0	1	0	0	1	1	1
0	0	1	0	0	0	0	0	0	0	1	0	0	0	0	0
0	0	1	0	0	0	0	0	0	0	1	0	0	1	0	1
0	0	0	0	0	0	0	1	1	1	0	0	0	1	0	0
0	0	0	0	0	0	1	0	0	1	0	0	0	1	0	0
0	0	0	0	0	0	1	0	0	1	0	0	0	0	1	0
0	0	0	0	0	0	0	0	0	1	0	0	0	1	1	0
0	0	0	0	0	0	0	0	0	1	0	0	0	0	0	0
0	0	0	0	0	0	0	0	0	1	0	0	0	1	0	0
0	0	1	0	0	0	1	0	0	1	1	0	0	1	0	0
0	0	1	0	0	0	1	0	0	1	1	0	0	0	1	0
0	0	1	0	0	0	0	0	0	1	1	0	0	1	1	0
0	0	1	0	0	0	0	1	0	1	1	0	0	0	1	0
0	0	1	0	0	0	0	0	0	1	1	0	0	1	0	0
0	0	1	0	0	0	0	1	1	1	1	0	0	1	0	1
0	0	1	0	0	0	1	0	0	1	1	0	0	1	0	0
0	0	1	0	0	0	1	0	0	1	1	0	0	0	1	0
0	0	1	0	0	0	0	0	0	1	1	0	0	1	1	0
0	0	1	0	0	0	0	0	0	1	1	0	0	0	0	0
0	0	1	0	0	0	0	0	0	1	1	0	0	1	0	0
1	0	0	1	1	0	1	0	0	1	0	0	0	1	0	1
1	0	0	1	1	0	1	0	0	1	0	0	0	0	1	1
1	0	0	1	1	0	0	0	0	1	0	0	0	1	1	1
1	0	0	1	1	0	0	0	0	1	0	0	0	1	0	0
0	0	0	1	1	0	1	0	0	0	1	0	0	1	0	1
0	0	0	1	1	0	1	0	0	0	1	0	0	0	1	1
0	0	0	1	1	0	0	0	0	0	1	0	0	1	1	1
0	0	0	1	1	0	0	0	0	0	1	0	0	1	0	1
0	0	1	0	1	0	1	0	0	0	1	0	0	1	0	0
0	0	1	0	1	0	1	0	0	0	1	0	0	0	1	0
0	0	1	0	1	0	0	0	0	0	1	0	0	1	1	0
0	0	1	0	1	0	0	1	0	0	1	0	0	0	1	0
0	0	1	0	1	0	0	0	0	0	1	0	0	1	0	0
0	0	1	0	0	0	0	1	1	0	0	1	0	1	0	1
0	0	1	0	0	0	1	0	0	0	0	1	0	1	0	1
0	0	1	0	0	0	1	0	0	0	0	1	0	0	1	1
0	0	1	0	0	0	0	0	0	0	0	1	0	1	1	1
0	0	1	0	0	0	0	0	0	0	0	1	0	0	0	1
0	0	1	0	0	0	0	0	0	0	0	1	0	1	0	1
0	0	0	0	0	0	0	1	1	0	1	0	0	1	0	0
0	0	0	0	0	0	1	0	0	0	1	0	0	1	0	0
0	0	0	0	0	0	1	0	0	0	1	0	0	0	1	0
0	0	0	0	0	0	0	0	0	0	1	0	0	1	1	0
0	0	0	0	0	0	0	0	0	0	1	0	0	0	0	0
0	0	0	0	0	0	0	0	0	0	1	0	0	1	0	0
0	1	0	1	1	0	1	0	0	1	0	0	0	1	0	1
0	1	0	1	1	0	1	0	0	1	0	0	0	0	1	1
0	1	0	1	1	0	0	0	0	1	0	0	0	1	1	1
0	1	0	1	1	0	0	1	0	1	0	0	0	0	1	1
0	1	0	1	1	0	0	0	0	1	0	0	0	1	0	1
1	0	0	1	1	0	1	0	0	0	0	0	0	1	0	1
1	0	0	1	1	0	1	0	0	0	0	0	0	0	1	1
1	0	0	1	1	0	0	0	0	0	0	0	0	1	1	1
1	0	0	1	1	0	0	0	0	0	0	0	0	1	0	1
0	0	1	0	0	0	0	1	1	0	0	0	0	1	0	0
0	0	1	0	0	0	1	0	0	0	0	0	0	1	0	1
0	0	1	0	0	0	1	0	0	0	0	0	0	0	1	1
0	0	1	0	0	0	0	0	0	0	0	0	0	1	1	0
0	0	1	0	0	0	0	0	0	0	0	0	0	0	0	0
0	0	1	0	0	0	0	0	0	0	0	0	0	1	0	1
0	0	0	0	1	0	1	0	0	0	1	0	0	1	0	1
0	0	0	0	1	0	1	0	0	0	1	0	0	0	1	1
0	0	0	0	1	0	0	0	0	0	1	0	0	1	1	1
0	0	0	0	1	0	0	1	0	0	1	0	0	0	1	1
0	0	0	0	1	0	0	0	0	0	1	0	0	1	0	1
0	0	1	0	1	0	1	0	0	1	1	0	1	1	0	1
0	0	1	0	1	0	1	0	0	1	1	0	1	0	1	1
0	0	1	0	1	0	0	0	0	1	1	0	1	1	1	0
0	0	1	0	1	0	0	1	0	1	1	0	1	0	1	0
0	0	1	0	1	0	0	0	0	1	1	0	1	1	0	0
0	0	0	0	1	0	1	0	0	0	1	0	0	1	0	0
0	0	0	0	1	0	1	0	0	0	1	0	0	0	1	0
0	0	0	0	1	0	0	0	0	0	1	0	0	1	1	0
0	0	0	0	1	0	0	1	0	0	1	0	0	0	1	0
0	0	0	0	1	0	0	0	0	0	1	0	0	1	0	0
0	0	0	1	1	1	1	0	0	0	0	0	0	1	0	1
0	0	0	1	1	1	1	0	0	0	0	0	0	0	1	0
0	0	0	1	1	1	0	0	0	0	0	0	0	1	1	1
0	0	0	1	1	1	0	0	0	0	0	0	0	1	0	1
0	1	0	0	0	0	0	1	1	0	1	0	0	1	0	1
0	1	0	0	0	0	1	0	0	0	1	0	0	1	0	1
0	1	0	0	0	0	1	0	0	0	1	0	0	0	1	1
0	1	0	0	0	0	0	0	0	0	1	0	0	1	1	1
0	1	0	0	0	0	0	0	0	0	1	0	0	0	0	1
0	1	0	0	0	0	0	0	0	0	1	0	0	1	0	1
0	0	1	0	1	0	1	0	0	0	1	0	0	1	0	1
0	0	1	0	1	0	1	0	0	0	1	0	0	0	1	1
0	0	1	0	1	0	0	0	0	0	1	0	0	1	1	0
0	0	1	0	1	0	0	1	0	0	1	0	0	0	1	1
0	0	1	0	1	0	0	0	0	0	1	0	0	1	0	0
0	0	1	0	0	0	1	0	0	1	0	0	0	1	0	1
0	0	1	0	0	0	1	0	0	1	0	0	0	0	1	1
0	0	1	0	0	0	0	0	0	1	0	0	0	1	1	0
0	0	1	0	0	0	0	1	0	1	0	0	0	0	1	0
0	0	1	0	0	0	0	0	0	1	0	0	0	1	0	0
1	0	0	1	0	0	1	0	0	1	0	0	1	1	0	1
1	0	0	1	0	0	1	0	0	1	0	0	1	0	1	1
1	0	0	1	0	0	0	0	0	1	0	0	1	1	1	1
1	0	0	1	0	0	0	0	0	1	0	0	1	1	0	1
0	0	1	0	1	0	1	0	0	0	1	0	0	1	0	0
0	0	1	0	1	0	1	0	0	0	1	0	0	0	1	0
0	0	1	0	1	0	0	0	0	0	1	0	0	1	1	0
0	0	1	0	1	0	0	1	0	0	1	0	0	0	1	0
0	0	1	0	1	0	0	0	0	0	1	0	0	1	0	0
0	0	0	0	0	0	0	1	1	0	0	0	0	1	0	0
0	0	0	0	0	0	1	0	0	0	0	0	0	1	0	0
0	0	0	0	0	0	1	0	0	0	0	0	0	0	1	0
0	0	0	0	0	0	0	0	0	0	0	0	0	1	1	0
0	0	0	0	0	0	0	0	0	0	0	0	0	0	0	0
0	0	0	0	0	0	0	0	0	0	0	0	0	1	0	0
0	0	1	1	1	0	1	0	0	0	1	0	0	1	0	0
0	0	1	1	1	0	1	0	0	0	1	0	0	0	1	0
0	0	1	1	1	0	0	0	0	0	1	0	0	1	1	0
0	0	1	1	1	0	0	0	0	0	1	0	0	1	0	0
1	0	0	1	1	0	1	0	0	1	0	0	0	1	0	1
1	0	0	1	1	0	1	0	0	1	0	0	0	0	1	1
1	0	0	1	1	0	0	0	0	1	0	0	0	1	1	1
1	0	0	1	1	0	0	0	0	1	0	0	0	1	0	1
1	0	0	0	0	0	0	1	1	1	0	0	1	1	0	0
1	0	0	0	0	0	1	0	0	1	0	0	1	1	0	1
1	0	0	0	0	0	1	0	0	1	0	0	1	0	1	1
1	0	0	0	0	0	0	0	0	1	0	0	1	1	1	0
1	0	0	0	0	0	0	0	0	1	0	0	1	0	0	1
1	0	0	0	0	0	0	0	0	1	0	0	1	1	0	1
0	0	0	0	0	0	0	1	1	0	1	0	0	1	0	1
0	0	0	0	0	0	1	0	0	0	1	0	0	1	0	0
0	0	0	0	0	0	1	0	0	0	1	0	0	0	1	0
0	0	0	0	0	0	0	0	0	0	1	0	0	1	1	0
0	0	0	0	0	0	0	0	0	0	1	0	0	0	0	0
0	0	0	0	0	0	0	0	0	0	1	0	0	1	0	0
0	0	0	0	0	0	1	0	0	0	0	0	1	1	0	0
0	0	0	0	0	0	1	0	0	0	0	0	1	0	1	1
0	0	0	0	0	0	0	0	0	0	0	0	1	1	1	0
0	0	0	0	0	0	0	0	0	0	0	0	1	1	0	0
1	0	0	0	1	0	1	0	0	1	1	0	0	1	0	1
1	0	0	0	1	0	1	0	0	1	1	0	0	0	1	1
1	0	0	0	1	0	0	0	0	1	1	0	0	1	1	1
1	0	0	0	1	0	0	1	0	1	1	0	0	0	1	1
1	0	0	0	1	0	0	0	0	1	1	0	0	1	0	0
0	0	0	1	0	0	1	0	0	0	0	0	0	1	0	0
0	0	0	1	0	0	1	0	0	0	0	0	0	0	1	0
0	0	0	1	0	0	0	0	0	0	0	0	0	1	1	0
0	0	0	1	0	0	0	1	0	0	0	0	0	0	1	0
0	0	0	1	0	0	0	0	0	0	0	0	0	1	0	0
1	0	0	0	1	0	1	0	0	0	0	0	0	1	0	1
1	0	0	0	1	0	1	0	0	0	0	0	0	0	1	1
1	0	0	0	1	0	0	0	0	0	0	0	0	1	1	0
1	0	0	0	1	0	0	0	0	0	0	0	0	1	0	0
0	0	0	0	1	0	1	0	0	0	1	0	0	1	0	0
0	0	0	0	1	0	1	0	0	0	1	0	0	0	1	0
0	0	0	0	1	0	0	0	0	0	1	0	0	1	1	0
0	0	0	0	1	0	0	1	0	0	1	0	0	0	1	0
0	0	0	0	1	0	0	0	0	0	1	0	0	1	0	0
0	0	0	1	1	0	1	0	0	0	0	0	0	1	0	1
0	0	0	1	1	0	1	0	0	0	0	0	0	0	1	1
0	0	0	1	1	0	0	0	0	0	0	0	0	1	1	1
0	0	0	1	1	0	0	0	0	0	0	0	0	1	0	0
0	0	0	0	0	0	1	0	0	0	1	0	0	1	0	1
0	0	0	0	0	0	1	0	0	0	1	0	0	0	1	0
0	0	0	0	0	0	0	0	0	0	1	0	0	1	1	0
0	0	0	0	0	0	0	0	0	0	1	0	0	1	0	0
0	0	0	0	1	0	1	0	0	0	1	0	0	1	0	0
0	0	0	0	1	0	1	0	0	0	1	0	0	0	1	0
0	0	0	0	1	0	0	0	0	0	1	0	0	1	1	0
0	0	0	0	1	0	0	1	0	0	1	0	0	0	1	0
0	0	0	0	1	0	0	0	0	0	1	0	0	1	0	0
0	0	0	0	0	0	0	1	1	0	1	0	0	1	0	0
0	0	0	0	0	0	0	0	0	0	1	0	0	0	0	0
0	0	1	0	0	0	0	1	1	1	0	0	0	1	0	0
0	0	1	0	0	0	1	0	0	1	0	0	0	1	0	0
0	0	1	0	0	0	1	0	0	1	0	0	0	0	1	1
0	0	1	0	0	0	0	0	0	1	0	0	0	1	1	0
0	0	1	0	0	0	0	0	0	1	0	0	0	0	0	1
0	0	1	0	0	0	0	0	0	1	0	0	0	1	0	0
0	0	0	1	1	0	1	0	0	0	0	0	0	1	0	0
0	0	0	1	1	0	1	0	0	0	0	0	0	0	1	0
0	0	0	1	1	0	0	0	0	0	0	0	0	1	1	0
0	0	0	1	1	0	0	1	0	0	0	0	0	0	1	0
0	0	0	1	1	0	0	0	0	0	0	0	0	1	0	0
