# Supplementary material
Source: ML conference proceedings conference paper supplement (https://proceedings.neurips.cc/paper_files/paper/2022/hash/5afaa8b4dd18eb1eed055d2d821b58ae-Abstract.html)
Supplement: Supplementary file 1 [file 5afaa8b4dd18eb1eed055d2d821b58ae-Supplemental-Conference.zip › 6769_exploring_the_whole_rashomon_s-Supplementary Material/6769_code_repo/experiments/datasets/coupon/CoffeeHouse.csv]

CoffeeHouse_1~3	CoffeeHouse_4~8	CoffeeHouse_gt8	CoffeeHouse_less1	expiration_1d	destination_No Urgent Place	time_10AM	direction_same	destination_Home	toCoupon_GEQ15min	Restaurant20To50_gt8	education_Bachelors degree	time_10PM	income_$75000 - $87499	passanger_Friend(s)	target
0	0	0	1	0	1	1	0	0	0	0	1	0	0	1	0
0	0	0	1	1	1	0	0	0	0	0	1	0	0	1	0
0	0	0	1	0	1	0	0	0	1	0	1	0	0	1	0
0	0	0	1	1	1	0	0	0	1	0	1	0	0	1	0
0	0	0	1	0	1	0	0	0	0	0	1	0	0	1	0
0	0	0	1	0	1	0	0	0	0	0	1	0	0	1	0
0	0	0	1	0	1	1	0	0	0	0	1	0	0	0	0
0	0	0	1	0	0	0	0	1	0	0	1	0	0	0	0
0	0	0	1	0	0	0	0	0	1	0	1	0	0	0	0
0	0	0	1	0	0	0	0	0	1	0	1	0	0	0	0
0	1	0	0	0	1	1	0	0	0	0	0	0	0	1	1
0	1	0	0	1	1	0	0	0	0	0	0	0	0	1	1
0	1	0	0	0	1	0	0	0	1	0	0	0	0	1	1
0	1	0	0	1	1	0	0	0	1	0	0	0	0	1	0
0	1	0	0	0	1	0	0	0	0	0	0	0	0	1	0
0	1	0	0	0	1	0	0	0	0	0	0	0	0	1	1
0	1	0	0	0	1	1	0	0	0	0	0	0	0	0	1
0	1	0	0	0	0	0	0	1	0	0	0	0	0	0	0
0	1	0	0	0	0	0	0	0	1	0	0	0	0	0	0
0	1	0	0	0	0	0	0	0	1	0	0	0	0	0	0
1	0	0	0	0	1	1	0	0	0	0	1	0	1	1	1
1	0	0	0	0	1	0	0	0	1	0	1	0	1	1	1
1	0	0	0	1	1	0	0	0	1	0	1	0	1	1	1
1	0	0	0	0	1	0	0	0	1	0	1	0	1	0	0
1	0	0	0	0	0	0	0	1	0	0	1	0	1	0	1
1	0	0	0	0	0	0	0	0	1	0	1	0	1	0	0
1	0	0	0	0	0	0	0	0	1	0	1	0	1	0	0
0	0	0	1	0	1	1	0	0	0	0	0	0	0	1	1
0	0	0	1	1	1	0	0	0	0	0	0	0	0	1	1
0	0	0	1	0	1	0	0	0	1	0	0	0	0	1	1
0	0	0	1	1	1	0	0	0	1	0	0	0	0	1	1
0	0	0	1	0	1	0	0	0	0	0	0	0	0	1	1
0	0	0	1	0	1	0	0	0	0	0	0	0	0	1	1
0	0	0	1	0	1	1	0	0	0	0	0	0	0	0	1
0	0	0	1	0	0	0	0	1	0	0	0	0	0	0	1
0	0	0	1	0	0	0	0	0	1	0	0	0	0	0	1
0	0	0	1	0	0	0	0	0	1	0	0	0	0	0	1
0	0	1	0	0	1	1	0	0	0	0	1	0	0	1	1
0	0	1	0	1	1	0	0	0	0	0	1	0	0	1	1
0	0	1	0	0	1	0	0	0	1	0	1	0	0	1	0
0	0	1	0	1	1	0	0	0	1	0	1	0	0	1	1
0	0	1	0	0	1	0	0	0	0	0	1	0	0	1	0
0	0	1	0	0	1	0	0	0	0	0	1	0	0	1	0
0	0	1	0	0	1	1	0	0	0	0	1	0	0	0	0
0	0	1	0	0	0	0	0	1	0	0	1	0	0	0	0
0	0	1	0	0	0	0	0	0	1	0	1	0	0	0	1
0	0	1	0	0	0	0	0	0	1	0	1	0	0	0	1
0	0	0	1	0	1	1	0	0	0	0	0	0	0	1	1
0	0	0	1	0	1	0	0	0	1	0	0	0	0	1	1
0	0	0	1	1	1	0	0	0	1	0	0	0	0	1	1
0	0	0	1	0	1	0	0	0	1	0	0	0	0	0	0
0	0	0	1	0	0	0	0	1	0	0	0	0	0	0	0
0	0	0	1	0	0	0	0	0	1	0	0	0	0	0	0
0	0	0	1	0	0	0	0	0	1	0	0	0	0	0	0
0	0	1	0	0	1	1	0	0	0	1	0	0	0	1	0
0	0	1	0	1	1	0	0	0	0	1	0	0	0	1	1
0	0	1	0	0	1	0	0	0	1	1	0	0	0	1	0
0	0	1	0	1	1	0	0	0	1	1	0	0	0	1	1
0	0	1	0	0	1	0	0	0	0	1	0	0	0	1	0
0	0	1	0	0	1	0	0	0	0	1	0	0	0	1	0
0	0	1	0	0	1	1	0	0	0	1	0	0	0	0	0
0	0	1	0	0	0	0	0	1	0	1	0	0	0	0	0
0	0	1	0	0	0	0	0	0	1	1	0	0	0	0	0
0	0	1	0	0	0	0	0	0	1	1	0	0	0	0	0
1	0	0	0	0	1	1	0	0	0	0	0	0	0	1	1
1	0	0	0	1	1	0	0	0	0	0	0	0	0	1	1
1	0	0	0	0	1	0	0	0	1	0	0	0	0	1	1
1	0	0	0	1	1	0	0	0	1	0	0	0	0	1	1
1	0	0	0	0	1	0	0	0	0	0	0	0	0	1	1
1	0	0	0	0	1	0	0	0	0	0	0	0	0	1	1
1	0	0	0	0	0	0	0	1	0	0	0	0	0	0	1
0	0	0	0	0	1	1	0	0	0	0	0	0	0	1	0
0	0	0	0	1	1	0	0	0	0	0	0	0	0	1	0
0	0	0	0	0	1	0	0	0	1	0	0	0	0	1	0
0	0	0	0	1	1	0	0	0	1	0	0	0	0	1	0
0	0	0	0	0	1	0	0	0	0	0	0	0	0	1	0
0	0	0	0	0	1	0	0	0	0	0	0	0	0	1	0
0	0	0	0	0	1	1	0	0	0	0	0	0	0	0	0
0	0	0	0	0	0	0	0	1	0	0	0	0	0	0	0
0	0	0	0	0	0	0	0	0	1	0	0	0	0	0	0
0	0	0	0	0	0	0	0	0	1	0	0	0	0	0	0
1	0	0	0	0	1	1	0	0	0	0	1	0	0	1	1
1	0	0	0	0	1	0	0	0	1	0	1	0	0	1	1
1	0	0	0	1	1	0	0	0	1	0	1	0	0	1	1
1	0	0	0	0	1	1	0	0	0	0	1	0	0	0	1
1	0	0	0	0	1	1	0	0	1	0	1	0	0	0	1
1	0	0	0	0	0	0	0	1	0	0	1	0	0	0	0
1	0	0	0	0	0	0	0	0	1	0	1	0	0	0	1
1	0	0	0	0	0	0	0	0	1	0	1	0	0	0	0
0	0	0	0	0	1	1	0	0	0	0	0	0	0	1	1
0	0	0	0	1	1	0	0	0	0	0	0	0	0	1	1
0	0	0	0	0	1	0	0	0	1	0	0	0	0	1	1
0	0	0	0	1	1	0	0	0	1	0	0	0	0	1	1
0	0	0	0	0	1	0	0	0	0	0	0	0	0	1	0
0	0	0	0	0	1	0	0	0	0	0	0	0	0	1	0
0	0	0	0	0	1	1	0	0	0	0	0	0	0	0	1
0	0	0	0	0	0	0	0	1	0	0	0	0	0	0	0
0	0	0	0	0	0	0	0	0	1	0	0	0	0	0	1
0	0	0	0	0	0	0	0	0	1	0	0	0	0	0	0
0	0	0	1	0	1	1	0	0	0	0	0	0	0	1	1
0	0	0	1	0	1	0	0	0	1	0	0	0	0	1	0
0	0	0	1	1	1	0	0	0	1	0	0	0	0	1	0
0	0	0	1	0	1	0	0	0	1	0	0	0	0	0	0
0	0	0	1	0	0	0	0	1	0	0	0	0	0	0	0
0	0	0	1	0	0	0	0	0	1	0	0	0	0	0	1
0	0	0	1	0	0	0	0	0	1	0	0	0	0	0	0
0	0	1	0	0	1	1	0	0	0	0	1	0	0	1	1
0	0	1	0	0	1	0	0	0	1	0	1	0	0	1	1
0	0	1	0	1	1	0	0	0	1	0	1	0	0	1	1
0	0	1	0	0	1	0	0	0	1	0	1	0	0	0	1
0	0	1	0	0	0	0	0	1	0	0	1	0	0	0	1
0	0	1	0	0	0	0	0	0	1	0	1	0	0	0	1
0	0	1	0	0	0	0	0	0	1	0	1	0	0	0	1
1	0	0	0	0	1	1	0	0	0	0	0	0	0	1	1
1	0	0	0	0	1	0	0	0	1	0	0	0	0	1	0
1	0	0	0	1	1	0	0	0	1	0	0	0	0	1	0
1	0	0	0	0	1	0	0	0	1	0	0	0	0	0	0
1	0	0	0	0	0	0	0	1	0	0	0	0	0	0	0
1	0	0	0	0	0	0	0	0	1	0	0	0	0	0	0
1	0	0	0	0	0	0	0	0	1	0	0	0	0	0	0
0	0	0	1	0	1	1	0	0	0	0	0	0	1	1	1
0	0	0	1	0	1	0	0	0	1	0	0	0	1	1	1
0	0	0	1	1	1	0	0	0	1	0	0	0	1	1	1
0	0	0	1	0	1	1	0	0	0	0	0	0	1	0	1
0	0	0	1	0	1	1	0	0	1	0	0	0	1	0	1
0	0	0	1	0	0	0	0	1	0	0	0	0	1	0	0
0	0	0	1	0	0	0	0	0	1	0	0	0	1	0	0
0	0	0	1	0	0	0	0	0	1	0	0	0	1	0	0
1	0	0	0	0	1	1	0	0	0	0	0	0	0	1	1
1	0	0	0	0	1	0	0	0	1	0	0	0	0	1	1
1	0	0	0	1	1	0	0	0	1	0	0	0	0	1	1
1	0	0	0	0	1	0	0	0	1	0	0	0	0	0	0
1	0	0	0	0	0	0	0	1	0	0	0	0	0	0	0
1	0	0	0	0	0	0	0	0	1	0	0	0	0	0	0
1	0	0	0	0	0	0	0	0	1	0	0	0	0	0	0
0	0	0	1	0	1	1	0	0	0	0	1	0	0	1	1
0	0	0	1	0	1	0	0	0	1	0	1	0	0	1	1
0	0	0	1	1	1	0	0	0	1	0	1	0	0	1	0
0	0	0	1	0	1	0	0	0	1	0	1	0	0	0	0
0	0	0	1	0	0	0	0	1	0	0	1	0	0	0	0
0	0	0	1	0	0	0	0	0	1	0	1	0	0	0	1
0	0	0	1	0	0	0	0	0	1	0	1	0	0	0	0
0	0	0	0	0	1	1	0	0	0	0	1	0	0	1	0
0	0	0	0	1	1	0	0	0	0	0	1	0	0	1	0
0	0	0	0	0	1	0	0	0	1	0	1	0	0	1	0
0	0	0	0	1	1	0	0	0	1	0	1	0	0	1	0
0	0	0	0	0	1	0	0	0	0	0	1	0	0	1	0
0	0	0	0	0	1	0	0	0	0	0	1	0	0	1	0
0	0	0	0	0	1	1	0	0	0	0	1	0	0	0	0
0	0	0	0	0	0	0	0	1	0	0	1	0	0	0	0
0	0	0	0	0	0	0	0	0	1	0	1	0	0	0	0
0	0	0	0	0	0	0	0	0	1	0	1	0	0	0	0
0	0	0	1	0	1	1	0	0	0	0	1	0	0	1	1
0	0	0	1	0	1	0	0	0	1	0	1	0	0	1	0
0	0	0	1	1	1	0	0	0	1	0	1	0	0	1	0
0	0	0	1	0	1	1	0	0	0	0	1	0	0	0	1
0	0	0	1	0	1	1	0	0	1	0	1	0	0	0	1
0	0	0	1	0	0	0	0	1	0	0	1	0	0	0	0
0	0	0	1	0	0	0	0	0	1	0	1	0	0	0	1
0	0	0	1	0	0	0	0	0	1	0	1	0	0	0	0
1	0	0	0	0	1	1	0	0	0	0	1	0	0	1	1
1	0	0	0	1	1	0	0	0	0	0	1	0	0	1	1
1	0	0	0	0	1	0	0	0	1	0	1	0	0	1	0
1	0	0	0	1	1	0	0	0	1	0	1	0	0	1	1
1	0	0	0	0	1	0	0	0	0	0	1	0	0	1	0
1	0	0	0	0	1	0	0	0	0	0	1	0	0	1	0
1	0	0	0	0	1	1	0	0	0	0	1	0	0	0	0
1	0	0	0	0	0	0	0	1	0	0	1	0	0	0	1
1	0	0	0	0	0	0	0	0	1	0	1	0	0	0	0
1	0	0	0	0	0	0	0	0	1	0	1	0	0	0	0
0	0	1	0	0	1	1	0	0	0	1	0	0	0	1	0
0	0	1	0	1	1	0	0	0	0	1	0	0	0	1	1
0	0	1	0	0	1	0	0	0	1	1	0	0	0	1	1
0	0	1	0	1	1	0	0	0	1	1	0	0	0	1	1
0	0	1	0	0	1	0	0	0	0	1	0	0	0	1	0
0	0	1	0	0	1	0	0	0	0	1	0	0	0	1	1
0	0	1	0	0	1	1	0	0	0	1	0	0	0	0	1
0	0	1	0	0	0	0	0	1	0	1	0	0	0	0	0
0	0	1	0	0	0	0	0	0	1	1	0	0	0	0	1
0	0	1	0	0	0	0	0	0	1	1	0	0	0	0	1
1	0	0	0	0	1	1	0	0	0	0	0	0	0	1	1
1	0	0	0	1	1	0	0	0	0	0	0	0	0	1	1
1	0	0	0	0	1	0	0	0	1	0	0	0	0	1	1
1	0	0	0	1	1	0	0	0	1	0	0	0	0	1	1
1	0	0	0	0	1	0	0	0	0	0	0	0	0	1	1
1	0	0	0	0	1	0	0	0	0	0	0	0	0	1	1
1	0	0	0	0	1	1	0	0	0	0	0	0	0	0	1
1	0	0	0	0	0	0	0	1	0	0	0	0	0	0	0
1	0	0	0	0	0	0	0	0	1	0	0	0	0	0	1
1	0	0	0	0	0	0	0	0	1	0	0	0	0	0	1
1	0	0	0	0	1	1	0	0	0	0	0	0	0	1	1
1	0	0	0	0	1	0	0	0	1	0	0	0	0	1	1
1	0	0	0	1	1	0	0	0	1	0	0	0	0	1	1
1	0	0	0	0	1	0	0	0	1	0	0	0	0	0	0
1	0	0	0	0	0	0	0	1	0	0	0	0	0	0	1
1	0	0	0	0	0	0	0	0	1	0	0	0	0	0	0
1	0	0	0	0	0	0	0	0	1	0	0	0	0	0	0
0	0	0	1	0	1	1	0	0	0	0	1	0	0	1	1
0	0	0	1	1	1	0	0	0	0	0	1	0	0	1	0
0	0	0	1	0	1	0	0	0	1	0	1	0	0	1	0
0	0	0	1	1	1	0	0	0	1	0	1	0	0	1	0
0	0	0	1	0	1	0	0	0	0	0	1	0	0	1	0
0	0	0	1	0	1	0	0	0	0	0	1	0	0	1	1
0	0	0	1	0	1	1	0	0	0	0	1	0	0	0	1
0	0	0	1	0	0	0	0	1	0	0	1	0	0	0	0
0	0	0	1	0	0	0	0	0	1	0	1	0	0	0	0
0	0	0	1	0	0	0	0	0	1	0	1	0	0	0	0
0	0	1	0	0	1	1	0	0	0	0	0	0	0	1	1
0	0	1	0	1	1	0	0	0	0	0	0	0	0	1	1
0	0	1	0	0	1	0	0	0	1	0	0	0	0	1	1
0	0	1	0	1	1	0	0	0	1	0	0	0	0	1	1
0	0	1	0	0	1	0	0	0	0	0	0	0	0	1	1
0	0	1	0	0	1	0	0	0	0	0	0	0	0	1	1
0	0	1	0	0	1	1	0	0	0	0	0	0	0	0	1
0	0	1	0	0	0	0	0	1	0	0	0	0	0	0	1
0	0	1	0	0	0	0	0	0	1	0	0	0	0	0	1
0	0	1	0	0	0	0	0	0	1	0	0	0	0	0	1
0	0	0	0	0	1	1	0	0	0	0	1	0	0	1	0
0	0	0	0	1	1	0	0	0	0	0	1	0	0	1	0
0	0	0	0	0	1	0	0	0	1	0	1	0	0	1	0
0	0	0	0	1	1	0	0	0	1	0	1	0	0	1	0
0	0	0	0	0	1	0	0	0	0	0	1	0	0	1	0
0	0	0	0	0	1	0	0	0	0	0	1	0	0	1	0
0	0	0	0	0	1	1	0	0	0	0	1	0	0	0	0
0	0	0	0	0	0	0	0	1	0	0	1	0	0	0	0
0	0	0	0	0	0	0	0	0	1	0	1	0	0	0	0
0	0	0	0	0	0	0	0	0	1	0	1	0	0	0	0
0	0	1	0	0	1	1	0	0	0	0	0	0	0	1	1
0	0	1	0	0	1	0	0	0	1	0	0	0	0	1	1
0	0	1	0	1	1	0	0	0	1	0	0	0	0	1	1
0	0	1	0	0	1	0	0	0	1	0	0	0	0	0	0
0	0	1	0	0	0	0	0	1	0	0	0	0	0	0	1
0	0	1	0	0	0	0	0	0	1	0	0	0	0	0	1
0	0	1	0	0	0	0	0	0	1	0	0	0	0	0	1
1	0	0	0	0	1	1	0	0	0	0	0	0	0	1	1
1	0	0	0	1	1	0	0	0	0	0	0	0	0	1	0
1	0	0	0	0	1	0	0	0	1	0	0	0	0	1	1
1	0	0	0	1	1	0	0	0	1	0	0	0	0	1	1
1	0	0	0	0	1	0	0	0	0	0	0	0	0	1	0
1	0	0	0	0	1	0	0	0	0	0	0	0	0	1	1
1	0	0	0	0	1	1	0	0	0	0	0	0	0	0	1
1	0	0	0	0	0	0	0	1	0	0	0	0	0	0	0
1	0	0	0	0	0	0	0	0	1	0	0	0	0	0	0
1	0	0	0	0	0	0	0	0	1	0	0	0	0	0	0
0	0	0	0	0	1	1	0	0	0	0	0	0	0	1	0
0	0	0	0	0	1	0	0	0	1	0	0	0	0	1	0
0	0	0	0	1	1	0	0	0	1	0	0	0	0	1	0
0	0	0	0	0	1	1	0	0	0	0	0	0	0	0	0
0	0	0	0	0	1	1	0	0	1	0	0	0	0	0	0
0	0	0	0	0	0	0	0	1	0	0	0	0	0	0	0
0	0	0	0	0	0	0	0	0	1	0	0	0	0	0	0
0	0	0	0	0	0	0	0	0	1	0	0	0	0	0	0
1	0	0	0	0	1	1	0	0	0	0	0	0	0	1	1
1	0	0	0	0	1	0	0	0	1	0	0	0	0	1	0
1	0	0	0	1	1	0	0	0	1	0	0	0	0	1	0
1	0	0	0	0	1	0	0	0	1	0	0	0	0	0	0
1	0	0	0	0	0	0	0	1	0	0	0	0	0	0	0
1	0	0	0	0	0	0	0	0	1	0	0	0	0	0	0
1	0	0	0	0	0	0	0	0	1	0	0	0	0	0	0
0	0	0	0	0	1	1	0	0	0	0	1	0	0	1	0
0	0	0	0	0	1	0	0	0	1	0	1	0	0	1	0
0	0	0	0	1	1	0	0	0	1	0	1	0	0	1	0
0	0	0	0	0	1	1	0	0	0	0	1	0	0	0	0
0	0	0	0	0	1	1	0	0	1	0	1	0	0	0	0
0	0	0	0	0	0	0	0	1	0	0	1	0	0	0	0
0	0	0	0	0	0	0	0	0	1	0	1	0	0	0	0
0	0	0	0	0	0	0	0	0	1	0	1	0	0	0	0
0	0	0	0	0	1	1	0	0	0	0	0	0	0	1	1
0	0	0	0	1	1	0	0	0	0	0	0	0	0	1	0
0	0	0	0	0	1	0	0	0	1	0	0	0	0	1	0
0	0	0	0	1	1	0	0	0	1	0	0	0	0	1	0
0	0	0	0	0	1	0	0	0	0	0	0	0	0	1	0
0	0	0	0	0	1	0	0	0	0	0	0	0	0	1	0
0	0	0	0	0	1	1	0	0	0	0	0	0	0	0	1
0	0	0	0	0	0	0	0	1	0	0	0	0	0	0	1
0	0	0	0	0	0	0	0	0	1	0	0	0	0	0	1
0	0	0	0	0	0	0	0	0	1	0	0	0	0	0	1
1	0	0	0	0	1	1	0	0	0	0	0	0	0	1	1
1	0	0	0	0	1	0	0	0	1	0	0	0	0	1	1
1	0	0	0	1	1	0	0	0	1	0	0	0	0	1	1
1	0	0	0	0	1	1	0	0	0	0	0	0	0	0	1
1	0	0	0	0	1	1	0	0	1	0	0	0	0	0	1
1	0	0	0	0	0	0	0	1	0	0	0	0	0	0	1
1	0	0	0	0	0	0	0	0	1	0	0	0	0	0	1
1	0	0	0	0	0	0	0	0	1	0	0	0	0	0	0
1	0	0	0	0	1	1	0	0	0	0	0	0	0	1	1
1	0	0	0	1	1	0	0	0	0	0	0	0	0	1	1
1	0	0	0	0	1	0	0	0	1	0	0	0	0	1	1
1	0	0	0	1	1	0	0	0	1	0	0	0	0	1	1
1	0	0	0	0	1	0	0	0	0	0	0	0	0	1	0
1	0	0	0	0	1	0	0	0	0	0	0	0	0	1	1
1	0	0	0	0	1	1	0	0	0	0	0	0	0	0	1
1	0	0	0	0	0	0	0	1	0	0	0	0	0	0	1
1	0	0	0	0	0	0	0	0	1	0	0	0	0	0	0
1	0	0	0	0	0	0	0	0	1	0	0	0	0	0	0
0	0	0	1	0	1	1	0	0	0	0	0	0	0	1	0
0	0	0	1	0	1	0	0	0	1	0	0	0	0	1	1
0	0	0	1	1	1	0	0	0	1	0	0	0	0	1	0
0	0	0	1	0	1	0	0	0	1	0	0	0	0	0	0
0	0	0	1	0	0	0	0	1	0	0	0	0	0	0	0
0	0	0	1	0	0	0	0	0	1	0	0	0	0	0	0
0	0	0	1	0	0	0	0	0	1	0	0	0	0	0	0
1	0	0	0	0	1	1	0	0	0	0	0	0	0	1	1
1	0	0	0	0	1	0	0	0	1	0	0	0	0	1	1
1	0	0	0	1	1	0	0	0	1	0	0	0	0	1	1
1	0	0	0	0	1	0	0	0	1	0	0	0	0	0	0
1	0	0	0	0	0	0	0	0	1	0	0	0	0	0	1
1	0	0	0	0	0	0	0	0	1	0	0	0	0	0	1
0	0	0	0	0	1	1	0	0	0	0	1	0	0	1	0
0	0	0	0	0	1	0	0	0	1	0	1	0	0	1	1
0	0	0	0	1	1	0	0	0	1	0	1	0	0	1	1
0	0	0	0	0	1	0	0	0	1	0	1	0	0	0	0
0	0	0	0	0	0	0	0	1	0	0	1	0	0	0	0
0	0	0	0	0	0	0	0	0	1	0	1	0	0	0	0
0	0	0	0	0	0	0	0	0	1	0	1	0	0	0	0
1	0	0	0	0	1	1	0	0	0	0	0	0	0	1	1
1	0	0	0	0	1	0	0	0	1	0	0	0	0	1	0
1	0	0	0	1	1	0	0	0	1	0	0	0	0	1	0
1	0	0	0	0	1	1	0	0	0	0	0	0	0	0	1
1	0	0	0	0	1	1	0	0	1	0	0	0	0	0	1
1	0	0	0	0	0	0	0	1	0	0	0	0	0	0	0
1	0	0	0	0	0	0	0	0	1	0	0	0	0	0	0
1	0	0	0	0	0	0	0	0	1	0	0	0	0	0	0
0	0	0	1	0	1	1	0	0	0	0	1	0	0	1	1
0	0	0	1	1	1	0	0	0	0	0	1	0	0	1	1
0	0	0	1	0	1	0	0	0	1	0	1	0	0	1	1
0	0	0	1	1	1	0	0	0	1	0	1	0	0	1	1
0	0	0	1	0	1	0	0	0	0	0	1	0	0	1	0
0	0	0	1	0	1	0	0	0	0	0	1	0	0	1	1
0	0	0	1	0	1	1	0	0	0	0	1	0	0	0	0
0	0	0	1	0	0	0	0	1	0	0	1	0	0	0	0
0	0	0	1	0	0	0	0	0	1	0	1	0	0	0	1
0	0	0	1	0	0	0	0	0	1	0	1	0	0	0	0
0	1	0	0	0	1	1	0	0	0	0	0	0	0	1	1
0	1	0	0	1	1	0	0	0	0	0	0	0	0	1	1
0	1	0	0	0	1	0	0	0	1	0	0	0	0	1	0
0	1	0	0	1	1	0	0	0	1	0	0	0	0	1	0
0	1	0	0	0	1	0	0	0	0	0	0	0	0	1	0
0	1	0	0	0	1	0	0	0	0	0	0	0	0	1	1
0	1	0	0	0	1	1	0	0	0	0	0	0	0	0	1
0	1	0	0	0	0	0	0	1	0	0	0	0	0	0	0
0	1	0	0	0	0	0	0	0	1	0	0	0	0	0	1
0	1	0	0	0	0	0	0	0	1	0	0	0	0	0	1
0	0	0	1	0	1	1	0	0	0	0	1	0	1	1	1
0	0	0	1	0	1	0	0	0	1	0	1	0	1	1	1
0	0	0	1	1	1	0	0	0	1	0	1	0	1	1	1
0	0	0	1	0	1	1	0	0	0	0	1	0	1	0	1
0	0	0	1	0	1	1	0	0	1	0	1	0	1	0	1
0	0	0	1	0	0	0	0	1	0	0	1	0	1	0	0
0	0	0	1	0	0	0	0	0	1	0	1	0	1	0	0
0	0	0	1	0	0	0	0	0	1	0	1	0	1	0	0
0	0	0	1	0	1	1	0	0	0	0	0	0	0	1	1
0	0	0	1	0	1	0	0	0	1	0	0	0	0	1	1
0	0	0	1	1	1	0	0	0	1	0	0	0	0	1	1
0	0	0	1	0	1	0	0	0	1	0	0	0	0	0	0
0	0	0	1	0	0	0	0	1	0	0	0	0	0	0	0
0	0	0	1	0	0	0	0	0	1	0	0	0	0	0	1
0	0	0	1	0	0	0	0	0	1	0	0	0	0	0	0
0	0	0	0	0	1	1	0	0	0	0	1	0	0	1	1
0	0	0	0	0	1	0	0	0	1	0	1	0	0	1	0
0	0	0	0	1	1	0	0	0	1	0	1	0	0	1	0
0	0	0	0	0	1	0	0	0	1	0	1	0	0	0	0
0	0	0	0	0	0	0	0	1	0	0	1	0	0	0	0
0	0	0	0	0	0	0	0	0	1	0	1	0	0	0	0
0	0	0	0	0	0	0	0	0	1	0	1	0	0	0	0
0	1	0	0	0	1	1	0	0	0	0	0	0	0	1	1
0	1	0	0	1	1	0	0	0	0	0	0	0	0	1	0
0	1	0	0	0	1	0	0	0	1	0	0	0	0	1	0
0	1	0	0	1	1	0	0	0	1	0	0	0	0	1	0
0	1	0	0	0	1	0	0	0	0	0	0	0	0	1	0
0	1	0	0	0	1	0	0	0	0	0	0	0	0	1	0
0	1	0	0	0	1	1	0	0	0	0	0	0	0	0	1
0	1	0	0	0	0	0	0	1	0	0	0	0	0	0	0
0	1	0	0	0	0	0	0	0	1	0	0	0	0	0	1
0	1	0	0	0	0	0	0	0	1	0	0	0	0	0	0
0	0	0	0	0	1	1	0	0	0	0	1	0	0	1	0
0	0	0	0	0	1	0	0	0	1	0	1	0	0	1	0
0	0	0	0	1	1	0	0	0	1	0	1	0	0	1	0
0	0	0	0	0	1	1	0	0	0	0	1	0	0	0	0
0	0	0	0	0	1	1	0	0	1	0	1	0	0	0	0
0	0	0	0	0	0	0	0	1	0	0	1	0	0	0	0
0	0	0	0	0	0	0	0	0	1	0	1	0	0	0	0
0	0	0	0	0	0	0	0	0	1	0	1	0	0	0	0
1	0	0	0	0	1	1	0	0	0	0	0	0	1	1	1
1	0	0	0	0	1	0	0	0	1	0	0	0	1	1	0
1	0	0	0	1	1	0	0	0	1	0	0	0	1	1	0
1	0	0	0	0	1	1	0	0	0	0	0	0	1	0	1
1	0	0	0	0	1	1	0	0	1	0	0	0	1	0	1
1	0	0	0	0	0	0	0	1	0	0	0	0	1	0	0
1	0	0	0	0	0	0	0	0	1	0	0	0	1	0	0
1	0	0	0	0	0	0	0	0	1	0	0	0	1	0	0
1	0	0	0	0	1	1	0	0	0	0	0	0	0	1	0
1	0	0	0	0	1	0	0	0	1	0	0	0	0	1	0
1	0	0	0	1	1	0	0	0	1	0	0	0	0	1	0
1	0	0	0	0	1	0	0	0	1	0	0	0	0	0	0
1	0	0	0	0	0	0	0	1	0	0	0	0	0	0	0
1	0	0	0	0	0	0	0	0	1	0	0	0	0	0	1
1	0	0	0	0	0	0	0	0	1	0	0	0	0	0	0
0	0	0	1	0	1	1	0	0	0	0	0	0	1	1	1
0	0	0	1	0	1	0	0	0	1	0	0	0	1	1	0
0	0	0	1	1	1	0	0	0	1	0	0	0	1	1	0
0	0	0	1	0	1	0	0	0	1	0	0	0	1	0	0
0	0	0	1	0	0	0	0	1	0	0	0	0	1	0	0
0	0	0	1	0	0	0	0	0	1	0	0	0	1	0	1
0	0	0	1	0	0	0	0	0	1	0	0	0	1	0	1
1	0	0	0	0	1	1	0	0	0	0	1	0	0	1	1
1	0	0	0	0	1	0	0	0	1	0	1	0	0	1	1
1	0	0	0	1	1	0	0	0	1	0	1	0	0	1	0
1	0	0	0	0	1	0	0	0	1	0	1	0	0	0	1
1	0	0	0	0	0	0	0	1	0	0	1	0	0	0	1
1	0	0	0	0	0	0	0	0	1	0	1	0	0	0	0
1	0	0	0	0	0	0	0	0	1	0	1	0	0	0	0
0	0	0	1	0	1	1	0	0	0	0	0	0	0	1	1
0	0	0	1	0	1	0	0	0	1	0	0	0	0	1	0
0	0	0	1	1	1	0	0	0	1	0	0	0	0	1	0
0	0	0	1	0	1	1	0	0	0	0	0	0	0	0	1
0	0	0	1	0	1	1	0	0	1	0	0	0	0	0	1
0	0	0	1	0	0	0	0	1	0	0	0	0	0	0	0
0	0	0	1	0	0	0	0	0	1	0	0	0	0	0	0
0	0	0	1	0	0	0	0	0	1	0	0	0	0	0	0
0	0	1	0	0	1	1	0	0	0	0	1	0	0	1	0
0	0	1	0	0	1	0	0	0	1	0	1	0	0	1	0
0	0	1	0	1	1	0	0	0	1	0	1	0	0	1	0
0	0	1	0	0	1	0	0	0	1	0	1	0	0	0	0
0	0	1	0	0	0	0	0	1	0	0	1	0	0	0	1
0	0	1	0	0	0	0	0	0	1	0	1	0	0	0	0
0	0	1	0	0	0	0	0	0	1	0	1	0	0	0	0
1	0	0	0	0	1	1	0	0	0	0	0	0	0	1	1
1	0	0	0	1	1	0	0	0	0	0	0	0	0	1	1
1	0	0	0	0	1	0	0	0	1	0	0	0	0	1	1
1	0	0	0	1	1	0	0	0	1	0	0	0	0	1	1
1	0	0	0	0	1	0	0	0	0	0	0	0	0	1	1
1	0	0	0	0	1	0	0	0	0	0	0	0	0	1	1
1	0	0	0	0	1	1	0	0	0	0	0	0	0	0	1
1	0	0	0	0	0	0	0	1	0	0	0	0	0	0	0
1	0	0	0	0	0	0	0	0	1	0	0	0	0	0	0
1	0	0	0	0	0	0	0	0	1	0	0	0	0	0	0
0	1	0	0	0	1	1	0	0	0	0	0	0	0	1	0
0	1	0	0	1	1	0	0	0	0	0	0	0	0	1	1
0	1	0	0	0	1	0	0	0	1	0	0	0	0	1	0
0	1	0	0	1	1	0	0	0	1	0	0	0	0	1	1
0	1	0	0	0	1	0	0	0	0	0	0	0	0	1	0
0	1	0	0	0	1	0	0	0	0	0	0	0	0	1	0
0	1	0	0	0	1	1	0	0	0	0	0	0	0	0	1
0	1	0	0	0	0	0	0	1	0	0	0	0	0	0	1
0	1	0	0	0	0	0	0	0	1	0	0	0	0	0	1
0	1	0	0	0	0	0	0	0	1	0	0	0	0	0	0
0	0	0	0	0	1	1	0	0	0	0	0	0	0	1	0
0	0	0	0	1	1	0	0	0	0	0	0	0	0	1	1
0	0	0	0	0	1	0	0	0	1	0	0	0	0	1	0
0	0	0	0	1	1	0	0	0	1	0	0	0	0	1	0
0	0	0	0	0	1	0	0	0	0	0	0	0	0	1	0
0	0	0	0	0	1	0	0	0	0	0	0	0	0	1	0
0	0	0	0	0	1	1	0	0	0	0	0	0	0	0	1
0	0	0	0	0	0	0	0	1	0	0	0	0	0	0	0
0	0	0	0	0	0	0	0	0	1	0	0	0	0	0	0
0	0	0	0	0	0	0	0	0	1	0	0	0	0	0	0
0	1	0	0	0	1	1	0	0	0	0	0	0	0	1	1
0	1	0	0	0	1	0	0	0	1	0	0	0	0	1	0
0	1	0	0	1	1	0	0	0	1	0	0	0	0	1	0
0	1	0	0	0	1	1	0	0	0	0	0	0	0	0	0
0	1	0	0	0	1	1	0	0	1	0	0	0	0	0	0
0	1	0	0	0	0	0	0	1	0	0	0	0	0	0	0
0	1	0	0	0	0	0	0	0	1	0	0	0	0	0	0
0	1	0	0	0	0	0	0	0	1	0	0	0	0	0	0
1	0	0	0	0	1	1	0	0	0	0	0	0	0	1	1
1	0	0	0	0	1	0	0	0	1	0	0	0	0	1	1
1	0	0	0	1	1	0	0	0	1	0	0	0	0	1	1
1	0	0	0	0	1	1	0	0	0	0	0	0	0	0	1
1	0	0	0	0	1	1	0	0	1	0	0	0	0	0	1
1	0	0	0	0	0	0	0	1	0	0	0	0	0	0	1
1	0	0	0	0	0	0	0	0	1	0	0	0	0	0	1
1	0	0	0	0	0	0	0	0	1	0	0	0	0	0	0
0	0	0	1	0	1	1	0	0	0	0	0	0	0	1	1
0	0	0	1	1	1	0	0	0	0	0	0	0	0	1	0
0	0	0	1	0	1	0	0	0	1	0	0	0	0	1	1
0	0	0	1	1	1	0	0	0	1	0	0	0	0	1	0
0	0	0	1	0	1	0	0	0	0	0	0	0	0	1	0
0	0	0	1	0	1	0	0	0	0	0	0	0	0	1	1
0	0	0	1	0	1	1	0	0	0	0	0	0	0	0	1
0	0	0	1	0	0	0	0	1	0	0	0	0	0	0	1
0	0	0	1	0	0	0	0	0	1	0	0	0	0	0	0
0	0	0	1	0	0	0	0	0	1	0	0	0	0	0	0
0	1	0	0	0	1	1	0	0	0	0	0	0	0	1	1
0	1	0	0	0	1	0	0	0	1	0	0	0	0	1	0
0	1	0	0	1	1	0	0	0	1	0	0	0	0	1	1
0	1	0	0	0	1	1	0	0	0	0	0	0	0	0	1
0	1	0	0	0	1	1	0	0	1	0	0	0	0	0	1
0	1	0	0	0	0	0	0	1	0	0	0	0	0	0	1
0	1	0	0	0	0	0	0	0	1	0	0	0	0	0	0
0	1	0	0	0	0	0	0	0	1	0	0	0	0	0	0
0	0	0	1	0	1	1	0	0	0	0	0	0	0	1	1
0	0	0	1	0	1	0	0	0	1	0	0	0	0	1	1
0	0	0	1	1	1	0	0	0	1	0	0	0	0	1	1
0	0	0	1	0	1	1	0	0	0	0	0	0	0	0	1
0	0	0	1	0	1	1	0	0	1	0	0	0	0	0	1
0	0	0	1	0	0	0	0	1	0	0	0	0	0	0	1
0	0	0	1	0	0	0	0	0	1	0	0	0	0	0	1
0	0	0	1	0	0	0	0	0	1	0	0	0	0	0	1
0	0	0	1	0	1	1	0	0	0	0	0	0	0	1	1
0	0	0	1	1	1	0	0	0	0	0	0	0	0	1	1
0	0	0	1	0	1	0	0	0	1	0	0	0	0	1	0
0	0	0	1	1	1	0	0	0	1	0	0	0	0	1	1
0	0	0	1	0	1	0	0	0	0	0	0	0	0	1	0
0	0	0	1	0	1	0	0	0	0	0	0	0	0	1	0
0	0	0	1	0	1	1	0	0	0	0	0	0	0	0	1
0	0	0	1	0	0	0	0	1	0	0	0	0	0	0	0
0	0	0	1	0	0	0	0	0	1	0	0	0	0	0	1
0	0	0	1	0	0	0	0	0	1	0	0	0	0	0	0
0	0	1	0	0	1	1	0	0	0	0	1	0	0	1	1
0	0	1	0	0	1	0	0	0	1	0	1	0	0	1	0
0	0	1	0	1	1	0	0	0	1	0	1	0	0	1	0
0	0	1	0	0	1	0	0	0	1	0	1	0	0	0	0
0	0	1	0	0	0	0	0	1	0	0	1	0	0	0	1
0	0	1	0	0	0	0	0	0	1	0	1	0	0	0	0
0	0	1	0	0	0	0	0	0	1	0	1	0	0	0	0
0	0	0	0	0	1	1	0	0	0	0	0	0	0	1	0
0	0	0	0	1	1	0	0	0	0	0	0	0	0	1	0
0	0	0	0	0	1	0	0	0	1	0	0	0	0	1	0
0	0	0	0	1	1	0	0	0	1	0	0	0	0	1	0
0	0	0	0	0	1	0	0	0	0	0	0	0	0	1	0
0	0	0	0	0	1	0	0	0	0	0	0	0	0	1	0
0	0	0	0	0	1	1	0	0	0	0	0	0	0	0	0
0	0	0	0	0	0	0	0	1	0	0	0	0	0	0	0
0	0	0	0	0	0	0	0	0	1	0	0	0	0	0	0
0	0	0	0	0	0	0	0	0	1	0	0	0	0	0	0
1	0	0	0	0	1	1	0	0	0	0	0	0	0	1	1
1	0	0	0	0	1	0	0	0	1	0	0	0	0	1	1
1	0	0	0	1	1	0	0	0	1	0	0	0	0	1	1
1	0	0	0	0	1	0	0	0	1	0	0	0	0	0	1
1	0	0	0	0	0	0	0	1	0	0	0	0	0	0	0
1	0	0	0	0	0	0	0	0	1	0	0	0	0	0	0
1	0	0	0	0	0	0	0	0	1	0	0	0	0	0	0
1	0	0	0	0	1	1	0	0	0	0	0	0	0	1	1
1	0	0	0	0	1	0	0	0	1	0	0	0	0	1	1
1	0	0	0	1	1	0	0	0	1	0	0	0	0	1	1
1	0	0	0	0	1	1	0	0	0	0	0	0	0	0	1
1	0	0	0	0	1	1	0	0	1	0	0	0	0	0	1
1	0	0	0	0	0	0	0	1	0	0	0	0	0	0	0
1	0	0	0	0	0	0	0	0	1	0	0	0	0	0	1
1	0	0	0	0	0	0	0	0	1	0	0	0	0	0	0
0	0	0	1	0	1	1	0	0	0	0	1	0	0	1	1
0	0	0	1	0	1	0	0	0	1	0	1	0	0	1	0
0	0	0	1	1	1	0	0	0	1	0	1	0	0	1	1
0	0	0	1	0	1	1	0	0	0	0	1	0	0	0	1
0	0	0	1	0	1	1	0	0	1	0	1	0	0	0	0
0	0	0	1	0	0	0	0	1	0	0	1	0	0	0	0
0	0	0	1	0	0	0	0	0	1	0	1	0	0	0	0
0	0	0	1	0	0	0	0	0	1	0	1	0	0	0	0
1	0	0	0	0	1	1	0	0	0	0	0	0	0	1	1
1	0	0	0	0	1	0	0	0	1	0	0	0	0	1	1
1	0	0	0	1	1	0	0	0	1	0	0	0	0	1	1
1	0	0	0	0	1	0	0	0	1	0	0	0	0	0	1
1	0	0	0	0	0	0	0	1	0	0	0	0	0	0	1
1	0	0	0	0	0	0	0	0	1	0	0	0	0	0	1
1	0	0	0	0	0	0	0	0	1	0	0	0	0	0	1
0	0	0	1	0	1	1	0	0	0	0	1	0	0	1	0
0	0	0	1	1	1	0	0	0	0	0	1	0	0	1	0
0	0	0	1	0	1	0	0	0	1	0	1	0	0	1	0
0	0	0	1	1	1	0	0	0	1	0	1	0	0	1	1
0	0	0	1	0	1	0	0	0	0	0	1	0	0	1	1
0	0	0	1	0	1	0	0	0	0	0	1	0	0	1	1
0	0	0	1	0	1	1	0	0	0	0	1	0	0	0	1
0	0	0	1	0	0	0	0	1	0	0	1	0	0	0	0
0	0	0	1	0	0	0	0	0	1	0	1	0	0	0	0
0	0	0	1	0	0	0	0	0	1	0	1	0	0	0	0
0	0	0	0	0	1	1	0	0	0	0	0	0	0	1	0
0	0	0	0	1	1	0	0	0	0	0	0	0	0	1	0
0	0	0	0	0	1	0	0	0	1	0	0	0	0	1	0
0	0	0	0	1	1	0	0	0	1	0	0	0	0	1	0
0	0	0	0	0	1	0	0	0	0	0	0	0	0	1	0
0	0	0	0	0	1	0	0	0	0	0	0	0	0	1	0
0	0	0	0	0	1	1	0	0	0	0	0	0	0	0	0
0	0	0	0	0	0	0	0	1	0	0	0	0	0	0	0
0	0	0	0	0	0	0	0	0	1	0	0	0	0	0	0
0	0	0	0	0	0	0	0	0	1	0	0	0	0	0	0
1	0	0	0	0	1	1	0	0	0	0	0	0	0	1	1
1	0	0	0	0	1	0	0	0	1	0	0	0	0	1	1
1	0	0	0	1	1	0	0	0	1	0	0	0	0	1	0
1	0	0	0	0	1	0	0	0	1	0	0	0	0	0	0
1	0	0	0	0	0	0	0	1	0	0	0	0	0	0	0
1	0	0	0	0	0	0	0	0	1	0	0	0	0	0	1
1	0	0	0	0	0	0	0	0	1	0	0	0	0	0	0
1	0	0	0	0	1	1	0	0	0	1	1	0	0	1	1
1	0	0	0	1	1	0	0	0	0	1	1	0	0	1	1
1	0	0	0	0	1	0	0	0	1	1	1	0	0	1	1
1	0	0	0	1	1	0	0	0	1	1	1	0	0	1	1
1	0	0	0	0	1	0	0	0	0	1	1	0	0	1	1
1	0	0	0	0	1	0	0	0	0	1	1	0	0	1	1
1	0	0	0	0	1	1	0	0	0	1	1	0	0	0	1
1	0	0	0	0	0	0	0	1	0	1	1	0	0	0	1
1	0	0	0	0	0	0	0	0	1	1	1	0	0	0	1
1	0	0	0	0	0	0	0	0	1	1	1	0	0	0	1
0	1	0	0	0	1	1	0	0	0	0	0	0	0	1	1
0	1	0	0	0	1	0	0	0	1	0	0	0	0	1	1
0	1	0	0	1	1	0	0	0	1	0	0	0	0	1	1
0	1	0	0	0	1	0	0	0	1	0	0	0	0	0	0
0	1	0	0	0	0	0	0	1	0	0	0	0	0	0	0
0	1	0	0	0	0	0	0	0	1	0	0	0	0	0	1
0	1	0	0	0	0	0	0	0	1	0	0	0	0	0	1
0	0	0	0	0	1	1	0	0	0	0	1	0	0	1	0
0	0	0	0	0	1	0	0	0	1	0	1	0	0	1	0
0	0	0	0	1	1	0	0	0	1	0	1	0	0	1	0
0	0	0	0	0	1	0	0	0	1	0	1	0	0	0	0
0	0	0	0	0	0	0	0	1	0	0	1	0	0	0	0
0	0	0	0	0	0	0	0	0	1	0	1	0	0	0	0
0	0	0	0	0	0	0	0	0	1	0	1	0	0	0	0
0	0	0	1	0	1	1	0	0	0	0	1	0	0	1	1
0	0	0	1	1	1	0	0	0	0	0	1	0	0	1	1
0	0	0	1	0	1	0	0	0	1	0	1	0	0	1	1
0	0	0	1	1	1	0	0	0	1	0	1	0	0	1	1
0	0	0	1	0	1	0	0	0	0	0	1	0	0	1	0
0	0	0	1	0	1	0	0	0	0	0	1	0	0	1	0
0	0	0	1	0	1	1	0	0	0	0	1	0	0	0	1
0	0	0	1	0	0	0	0	1	0	0	1	0	0	0	0
0	0	0	1	0	0	0	0	0	1	0	1	0	0	0	1
0	0	0	1	0	0	0	0	0	1	0	1	0	0	0	0
0	0	0	1	0	1	1	0	0	0	0	0	0	0	1	0
0	0	0	1	0	1	0	0	0	1	0	0	0	0	1	1
0	0	0	1	1	1	0	0	0	1	0	0	0	0	1	1
0	0	0	1	0	1	0	0	0	1	0	0	0	0	0	0
0	0	0	1	0	0	0	0	1	0	0	0	0	0	0	0
0	0	0	1	0	0	0	0	0	1	0	0	0	0	0	0
0	0	0	1	0	0	0	0	0	1	0	0	0	0	0	0
0	0	0	1	0	1	1	0	0	0	0	1	0	0	1	0
0	0	0	1	0	1	0	0	0	1	0	1	0	0	1	0
0	0	0	1	1	1	0	0	0	1	0	1	0	0	1	0
0	0	0	1	0	1	1	0	0	0	0	1	0	0	0	0
0	0	0	1	0	1	1	0	0	1	0	1	0	0	0	0
0	0	0	1	0	0	0	0	1	0	0	1	0	0	0	0
0	0	0	1	0	0	0	0	0	1	0	1	0	0	0	0
0	0	0	1	0	0	0	0	0	1	0	1	0	0	0	0
1	0	0	0	0	1	1	0	0	0	0	1	0	0	1	1
1	0	0	0	1	1	0	0	0	0	0	1	0	0	1	1
1	0	0	0	0	1	0	0	0	1	0	1	0	0	1	1
1	0	0	0	1	1	0	0	0	1	0	1	0	0	1	1
1	0	0	0	0	1	0	0	0	0	0	1	0	0	1	1
1	0	0	0	0	1	0	0	0	0	0	1	0	0	1	1
1	0	0	0	0	1	1	0	0	0	0	1	0	0	0	1
1	0	0	0	0	0	0	0	1	0	0	1	0	0	0	1
1	0	0	0	0	0	0	0	0	1	0	1	0	0	0	0
1	0	0	0	0	0	0	0	0	1	0	1	0	0	0	0
1	0	0	0	0	1	1	0	0	0	0	0	0	0	1	1
1	0	0	0	0	1	0	0	0	1	0	0	0	0	1	0
1	0	0	0	1	1	0	0	0	1	0	0	0	0	1	0
1	0	0	0	0	1	1	0	0	0	0	0	0	0	0	0
1	0	0	0	0	1	1	0	0	1	0	0	0	0	0	1
1	0	0	0	0	0	0	0	1	0	0	0	0	0	0	1
1	0	0	0	0	0	0	0	0	1	0	0	0	0	0	0
1	0	0	0	0	0	0	0	0	1	0	0	0	0	0	1
0	0	0	1	0	1	1	0	0	0	0	0	0	0	1	1
0	0	0	1	0	1	0	0	0	1	0	0	0	0	1	1
0	0	0	1	1	1	0	0	0	1	0	0	0	0	1	1
0	0	0	1	0	1	0	0	0	1	0	0	0	0	0	0
0	0	0	1	0	0	0	0	1	0	0	0	0	0	0	1
0	0	0	1	0	0	0	0	0	1	0	0	0	0	0	1
0	0	0	1	0	0	0	0	0	1	0	0	0	0	0	1
0	0	0	1	0	1	1	0	0	0	0	1	0	0	1	1
0	0	0	1	0	1	0	0	0	1	0	1	0	0	1	0
0	0	0	1	1	1	0	0	0	1	0	1	0	0	1	1
0	0	0	1	0	1	0	0	0	1	0	1	0	0	0	0
0	0	0	1	0	0	0	0	1	0	0	1	0	0	0	0
0	0	0	1	0	0	0	0	0	1	0	1	0	0	0	0
0	0	0	1	0	0	0	0	0	1	0	1	0	0	0	0
1	0	0	0	0	1	1	0	0	0	0	0	0	0	1	1
1	0	0	0	1	1	0	0	0	0	0	0	0	0	1	1
1	0	0	0	0	1	0	0	0	1	0	0	0	0	1	1
1	0	0	0	1	1	0	0	0	1	0	0	0	0	1	1
1	0	0	0	0	1	0	0	0	0	0	0	0	0	1	1
1	0	0	0	0	1	0	0	0	0	0	0	0	0	1	1
1	0	0	0	0	1	1	0	0	0	0	0	0	0	0	1
1	0	0	0	0	0	0	0	1	0	0	0	0	0	0	1
1	0	0	0	0	0	0	0	0	1	0	0	0	0	0	1
1	0	0	0	0	0	0	0	0	1	0	0	0	0	0	1
0	0	0	0	0	1	1	0	0	0	0	1	0	0	1	1
0	0	0	0	1	1	0	0	0	0	0	1	0	0	1	1
0	0	0	0	0	1	0	0	0	1	0	1	0	0	1	1
0	0	0	0	1	1	0	0	0	1	0	1	0	0	1	1
0	0	0	0	0	1	0	0	0	0	0	1	0	0	1	1
0	0	0	0	0	1	0	0	0	0	0	1	0	0	1	1
0	0	0	0	0	1	1	0	0	0	0	1	0	0	0	0
0	0	0	0	0	0	0	0	1	0	0	1	0	0	0	0
0	0	0	0	0	0	0	0	0	1	0	1	0	0	0	0
0	0	0	0	0	0	0	0	0	1	0	1	0	0	0	0
0	0	0	1	0	1	1	0	0	0	0	0	0	0	1	1
0	0	0	1	1	1	0	0	0	0	0	0	0	0	1	1
0	0	0	1	0	1	0	0	0	1	0	0	0	0	1	1
0	0	0	1	1	1	0	0	0	1	0	0	0	0	1	1
0	0	0	1	0	1	0	0	0	0	0	0	0	0	1	1
0	0	0	1	0	1	0	0	0	0	0	0	0	0	1	1
0	0	0	1	0	1	1	0	0	0	0	0	0	0	0	1
0	0	0	1	0	0	0	0	1	0	0	0	0	0	0	1
0	0	0	1	0	0	0	0	0	1	0	0	0	0	0	0
0	0	0	1	0	0	0	0	0	1	0	0	0	0	0	0
1	0	0	0	0	1	1	0	0	0	0	1	0	0	1	1
1	0	0	0	1	1	0	0	0	0	0	1	0	0	1	1
1	0	0	0	0	1	0	0	0	1	0	1	0	0	1	1
1	0	0	0	1	1	0	0	0	1	0	1	0	0	1	1
1	0	0	0	0	1	0	0	0	0	0	1	0	0	1	1
1	0	0	0	0	1	0	0	0	0	0	1	0	0	1	1
1	0	0	0	0	1	1	0	0	0	0	1	0	0	0	0
1	0	0	0	0	0	0	0	1	0	0	1	0	0	0	0
1	0	0	0	0	0	0	0	0	1	0	1	0	0	0	0
1	0	0	0	0	0	0	0	0	1	0	1	0	0	0	0
1	0	0	0	0	1	1	0	0	0	0	1	0	0	1	1
1	0	0	0	1	1	0	0	0	0	0	1	0	0	1	1
1	0	0	0	0	1	0	0	0	1	0	1	0	0	1	1
1	0	0	0	1	1	0	0	0	1	0	1	0	0	1	1
1	0	0	0	0	1	0	0	0	0	0	1	0	0	1	1
1	0	0	0	0	1	0	0	0	0	0	1	0	0	1	1
1	0	0	0	0	1	1	0	0	0	0	1	0	0	0	1
1	0	0	0	0	0	0	0	1	0	0	1	0	0	0	1
1	0	0	0	0	0	0	0	0	1	0	1	0	0	0	0
1	0	0	0	0	0	0	0	0	1	0	1	0	0	0	0
0	1	0	0	0	1	1	0	0	0	0	0	0	0	1	0
0	1	0	0	0	1	0	0	0	1	0	0	0	0	1	0
0	1	0	0	1	1	0	0	0	1	0	0	0	0	1	0
0	1	0	0	0	1	0	0	0	1	0	0	0	0	0	1
0	1	0	0	0	0	0	0	1	0	0	0	0	0	0	0
0	1	0	0	0	0	0	0	0	1	0	0	0	0	0	0
0	1	0	0	0	0	0	0	0	1	0	0	0	0	0	0
1	0	0	0	0	1	1	0	0	0	0	0	0	1	1	1
1	0	0	0	0	1	0	0	0	1	0	0	0	1	1	0
1	0	0	0	1	1	0	0	0	1	0	0	0	1	1	0
1	0	0	0	0	1	0	0	0	1	0	0	0	1	0	0
1	0	0	0	0	0	0	0	1	0	0	0	0	1	0	0
1	0	0	0	0	0	0	0	0	1	0	0	0	1	0	1
1	0	0	0	0	0	0	0	0	1	0	0	0	1	0	0
0	0	0	0	0	1	1	0	0	0	0	1	0	0	1	1
0	0	0	0	0	1	0	0	0	1	0	1	0	0	1	1
0	0	0	0	1	1	0	0	0	1	0	1	0	0	1	0
0	0	0	0	0	1	1	0	0	0	0	1	0	0	0	1
0	0	0	0	0	1	1	0	0	1	0	1	0	0	0	1
0	0	0	0	0	0	0	0	1	0	0	1	0	0	0	0
0	0	0	0	0	0	0	0	0	1	0	1	0	0	0	1
0	0	0	0	0	0	0	0	0	1	0	1	0	0	0	0
0	0	0	0	0	1	1	0	0	0	0	0	0	0	1	1
0	0	0	0	0	1	0	0	0	1	0	0	0	0	1	0
0	0	0	0	1	1	0	0	0	1	0	0	0	0	1	0
0	0	0	0	0	1	1	0	0	0	0	0	0	0	0	0
0	0	0	0	0	1	1	0	0	1	0	0	0	0	0	0
0	0	0	0	0	0	0	0	1	0	0	0	0	0	0	0
0	0	0	0	0	0	0	0	0	1	0	0	0	0	0	0
0	0	0	0	0	0	0	0	0	1	0	0	0	0	0	0
1	0	0	0	0	1	1	0	0	0	0	0	0	0	1	1
1	0	0	0	0	1	0	0	0	1	0	0	0	0	1	0
1	0	0	0	1	1	0	0	0	1	0	0	0	0	1	1
1	0	0	0	0	1	0	0	0	1	0	0	0	0	0	0
1	0	0	0	0	0	0	0	1	0	0	0	0	0	0	0
1	0	0	0	0	0	0	0	0	1	0	0	0	0	0	1
1	0	0	0	0	0	0	0	0	1	0	0	0	0	0	0
0	0	1	0	0	1	1	0	0	0	0	0	0	0	1	1
0	0	1	0	0	1	0	0	0	1	0	0	0	0	1	0
0	0	1	0	1	1	0	0	0	1	0	0	0	0	1	1
0	0	1	0	0	1	0	0	0	1	0	0	0	0	0	0
0	0	1	0	0	0	0	0	1	0	0	0	0	0	0	1
0	0	1	0	0	0	0	0	0	1	0	0	0	0	0	0
0	0	1	0	0	0	0	0	0	1	0	0	0	0	0	0
0	0	1	0	0	1	1	0	0	0	0	0	0	0	1	1
0	0	1	0	0	1	0	0	0	1	0	0	0	0	1	1
0	0	1	0	1	1	0	0	0	1	0	0	0	0	1	1
0	0	1	0	0	1	0	0	0	1	0	0	0	0	0	0
0	0	1	0	0	0	0	0	1	0	0	0	0	0	0	0
0	0	1	0	0	0	0	0	0	1	0	0	0	0	0	0
0	0	1	0	0	0	0	0	0	1	0	0	0	0	0	0
1	0	0	0	0	1	1	0	0	0	0	1	0	0	1	1
1	0	0	0	1	1	0	0	0	0	0	1	0	0	1	1
1	0	0	0	0	1	0	0	0	1	0	1	0	0	1	1
1	0	0	0	1	1	0	0	0	1	0	1	0	0	1	1
1	0	0	0	0	1	0	0	0	0	0	1	0	0	1	1
1	0	0	0	0	1	0	0	0	0	0	1	0	0	1	1
1	0	0	0	0	1	1	0	0	0	0	1	0	0	0	1
1	0	0	0	0	0	0	0	1	0	0	1	0	0	0	1
1	0	0	0	0	0	0	0	0	1	0	1	0	0	0	0
1	0	0	0	0	0	0	0	0	1	0	1	0	0	0	0
1	0	0	0	0	1	1	0	0	0	0	0	0	0	1	1
1	0	0	0	1	1	0	0	0	0	0	0	0	0	1	1
1	0	0	0	0	1	0	0	0	1	0	0	0	0	1	1
1	0	0	0	1	1	0	0	0	1	0	0	0	0	1	1
1	0	0	0	0	1	0	0	0	0	0	0	0	0	1	1
1	0	0	0	0	1	0	0	0	0	0	0	0	0	1	1
1	0	0	0	0	1	1	0	0	0	0	0	0	0	0	1
1	0	0	0	0	0	0	0	1	0	0	0	0	0	0	0
1	0	0	0	0	0	0	0	0	1	0	0	0	0	0	0
1	0	0	0	0	0	0	0	0	1	0	0	0	0	0	0
0	1	0	0	0	1	1	0	0	0	0	0	0	0	1	1
0	1	0	0	0	1	0	0	0	1	0	0	0	0	1	1
0	1	0	0	1	1	0	0	0	1	0	0	0	0	1	1
0	1	0	0	0	1	0	0	0	1	0	0	0	0	0	1
0	1	0	0	0	0	0	0	1	0	0	0	0	0	0	0
0	1	0	0	0	0	0	0	0	1	0	0	0	0	0	1
0	1	0	0	0	0	0	0	0	1	0	0	0	0	0	1
0	0	1	0	0	1	1	0	0	0	0	1	0	0	1	1
0	0	1	0	1	1	0	0	0	0	0	1	0	0	1	1
0	0	1	0	0	1	0	0	0	1	0	1	0	0	1	1
0	0	1	0	1	1	0	0	0	1	0	1	0	0	1	1
0	0	1	0	0	1	0	0	0	0	0	1	0	0	1	1
0	0	1	0	0	1	0	0	0	0	0	1	0	0	1	1
0	0	1	0	0	1	1	0	0	0	0	1	0	0	0	1
0	0	1	0	0	0	0	0	1	0	0	1	0	0	0	0
0	0	1	0	0	0	0	0	0	1	0	1	0	0	0	1
0	0	1	0	0	0	0	0	0	1	0	1	0	0	0	0
0	0	0	1	0	1	1	0	0	0	0	1	0	0	1	1
0	0	0	1	1	1	0	0	0	0	0	1	0	0	1	0
0	0	0	1	0	1	0	0	0	1	0	1	0	0	1	0
0	0	0	1	1	1	0	0	0	1	0	1	0	0	1	0
0	0	0	1	0	1	0	0	0	0	0	1	0	0	1	0
0	0	0	1	0	1	0	0	0	0	0	1	0	0	1	0
0	0	0	1	0	1	1	0	0	0	0	1	0	0	0	1
0	0	0	1	0	0	0	0	1	0	0	1	0	0	0	0
0	0	0	1	0	0	0	0	0	1	0	1	0	0	0	0
0	0	0	1	0	0	0	0	0	1	0	1	0	0	0	0
0	0	0	0	0	1	1	0	0	0	0	0	0	0	1	0
0	0	0	0	0	1	0	0	0	1	0	0	0	0	1	0
0	0	0	0	1	1	0	0	0	1	0	0	0	0	1	0
0	0	0	0	0	1	1	0	0	0	0	0	0	0	0	1
0	0	0	0	0	1	1	0	0	1	0	0	0	0	0	1
0	0	0	0	0	0	0	0	1	0	0	0	0	0	0	0
0	0	0	0	0	0	0	0	0	1	0	0	0	0	0	0
0	0	0	0	0	0	0	0	0	1	0	0	0	0	0	0
0	0	0	1	0	1	1	0	0	0	0	0	0	0	1	0
0	0	0	1	0	1	0	0	0	1	0	0	0	0	1	0
0	0	0	1	1	1	0	0	0	1	0	0	0	0	1	0
0	0	0	1	0	1	1	0	0	0	0	0	0	0	0	0
0	0	0	1	0	1	1	0	0	1	0	0	0	0	0	0
0	0	0	1	0	0	0	0	1	0	0	0	0	0	0	0
0	0	0	1	0	0	0	0	0	1	0	0	0	0	0	1
0	0	0	1	0	0	0	0	0	1	0	0	0	0	0	0
0	0	0	0	0	1	1	0	0	0	0	0	0	0	1	0
0	0	0	0	1	1	0	0	0	0	0	0	0	0	1	0
0	0	0	0	0	1	0	0	0	1	0	0	0	0	1	0
0	0	0	0	1	1	0	0	0	1	0	0	0	0	1	0
0	0	0	0	0	1	0	0	0	0	0	0	0	0	1	0
0	0	0	0	0	1	0	0	0	0	0	0	0	0	1	0
0	0	0	0	0	1	1	0	0	0	0	0	0	0	0	0
0	0	0	0	0	0	0	0	1	0	0	0	0	0	0	0
0	0	0	0	0	0	0	0	0	1	0	0	0	0	0	0
0	0	0	0	0	0	0	0	0	1	0	0	0	0	0	0
0	0	0	1	0	1	1	0	0	0	0	0	0	0	1	1
0	0	0	1	1	1	0	0	0	0	0	0	0	0	1	0
0	0	0	1	0	1	0	0	0	1	0	0	0	0	1	1
0	0	0	1	1	1	0	0	0	1	0	0	0	0	1	1
0	0	0	1	0	1	0	0	0	0	0	0	0	0	1	0
0	0	0	1	0	1	0	0	0	0	0	0	0	0	1	1
0	0	0	1	0	1	1	0	0	0	0	0	0	0	0	0
0	0	0	1	0	0	0	0	1	0	0	0	0	0	0	1
0	0	0	1	0	0	0	0	0	1	0	0	0	0	0	0
0	0	0	1	0	0	0	0	0	1	0	0	0	0	0	1
0	0	1	0	0	1	1	0	0	0	0	0	0	0	1	1
0	0	1	0	0	1	0	0	0	1	0	0	0	0	1	1
0	0	1	0	1	1	0	0	0	1	0	0	0	0	1	1
0	0	1	0	0	1	1	0	0	0	0	0	0	0	0	1
0	0	1	0	0	1	1	0	0	1	0	0	0	0	0	1
0	0	1	0	0	0	0	0	1	0	0	0	0	0	0	1
0	0	1	0	0	0	0	0	0	1	0	0	0	0	0	0
0	0	1	0	0	0	0	0	0	1	0	0	0	0	0	0
1	0	0	0	0	1	1	0	0	0	0	1	0	0	1	0
1	0	0	0	1	1	0	0	0	0	0	1	0	0	1	0
1	0	0	0	0	1	0	0	0	1	0	1	0	0	1	0
1	0	0	0	0	1	0	0	0	0	0	1	0	0	1	0
1	0	0	0	0	1	0	0	0	0	0	1	0	0	1	0
1	0	0	0	0	1	1	0	0	0	0	1	0	0	0	0
1	0	0	0	0	0	0	0	1	0	0	1	0	0	0	1
1	0	0	0	0	0	0	0	0	1	0	1	0	0	0	0
1	0	0	0	0	0	0	0	0	1	0	1	0	0	0	0
1	0	0	0	0	1	1	0	0	0	0	0	0	0	1	1
1	0	0	0	0	1	0	0	0	1	0	0	0	0	1	0
1	0	0	0	1	1	0	0	0	1	0	0	0	0	1	1
1	0	0	0	0	1	0	0	0	1	0	0	0	0	0	0
1	0	0	0	0	0	0	0	1	0	0	0	0	0	0	0
1	0	0	0	0	0	0	0	0	1	0	0	0	0	0	0
1	0	0	0	0	0	0	0	0	1	0	0	0	0	0	0
0	0	0	1	0	1	1	0	0	0	0	0	0	0	1	0
0	0	0	1	1	1	0	0	0	0	0	0	0	0	1	0
0	0	0	1	0	1	0	0	0	1	0	0	0	0	1	0
0	0	0	1	1	1	0	0	0	1	0	0	0	0	1	0
0	0	0	1	0	1	0	0	0	0	0	0	0	0	1	0
0	0	0	1	0	1	0	0	0	0	0	0	0	0	1	0
0	0	0	1	0	1	1	0	0	0	0	0	0	0	0	0
0	0	0	1	0	0	0	0	1	0	0	0	0	0	0	0
0	0	0	1	0	0	0	0	0	1	0	0	0	0	0	0
0	0	0	1	0	0	0	0	0	1	0	0	0	0	0	0
0	0	0	0	0	1	1	0	0	0	0	0	0	1	1	0
0	0	0	0	0	1	0	0	0	1	0	0	0	1	1	0
0	0	0	0	1	1	0	0	0	1	0	0	0	1	1	0
0	0	0	0	0	1	0	0	0	1	0	0	0	1	0	0
0	0	0	0	0	0	0	0	1	0	0	0	0	1	0	0
0	0	0	0	0	0	0	0	0	1	0	0	0	1	0	0
0	0	0	0	0	0	0	0	0	1	0	0	0	1	0	0
0	1	0	0	0	1	1	0	0	0	0	1	0	0	1	1
0	1	0	0	1	1	0	0	0	0	0	1	0	0	1	1
0	1	0	0	0	1	0	0	0	1	0	1	0	0	1	1
0	1	0	0	1	1	0	0	0	1	0	1	0	0	1	1
0	1	0	0	0	1	0	0	0	0	0	1	0	0	1	1
0	1	0	0	0	1	0	0	0	0	0	1	0	0	1	1
0	1	0	0	0	1	1	0	0	0	0	1	0	0	0	1
0	1	0	0	0	0	0	0	1	0	0	1	0	0	0	1
0	1	0	0	0	0	0	0	0	1	0	1	0	0	0	0
0	1	0	0	0	0	0	0	0	1	0	1	0	0	0	0
0	0	1	0	0	1	1	0	0	0	0	1	0	0	1	1
0	0	1	0	0	1	0	0	0	1	0	1	0	0	1	1
0	0	1	0	1	1	0	0	0	1	0	1	0	0	1	1
0	0	1	0	0	1	1	0	0	0	0	1	0	0	0	1
0	0	1	0	0	1	1	0	0	1	0	1	0	0	0	1
0	0	1	0	0	0	0	0	1	0	0	1	0	0	0	0
0	0	1	0	0	0	0	0	0	1	0	1	0	0	0	1
0	0	1	0	0	0	0	0	0	1	0	1	0	0	0	0
0	0	0	1	0	1	1	0	0	0	0	0	0	0	1	1
0	0	0	1	0	1	0	0	0	1	0	0	0	0	1	1
0	0	0	1	1	1	0	0	0	1	0	0	0	0	1	1
0	0	0	1	0	1	1	0	0	0	0	0	0	0	0	1
0	0	0	1	0	1	1	0	0	1	0	0	0	0	0	1
0	0	0	1	0	0	0	0	1	0	0	0	0	0	0	0
0	0	0	1	0	0	0	0	0	1	0	0	0	0	0	0
0	0	0	1	0	0	0	0	0	1	0	0	0	0	0	0
0	0	0	0	0	1	1	0	0	0	0	0	0	1	1	0
0	0	0	0	1	1	0	0	0	0	0	0	0	1	1	0
0	0	0	0	0	1	0	0	0	1	0	0	0	1	1	0
0	0	0	0	1	1	0	0	0	1	0	0	0	1	1	1
0	0	0	0	0	1	0	0	0	0	0	0	0	1	1	0
0	0	0	0	0	1	0	0	0	0	0	0	0	1	1	0
0	0	0	0	0	1	1	0	0	0	0	0	0	1	0	0
0	0	0	0	0	0	0	0	1	0	0	0	0	1	0	0
0	0	0	0	0	0	0	0	0	1	0	0	0	1	0	0
0	0	0	1	0	1	1	0	0	0	0	0	0	0	1	1
0	0	0	1	1	1	0	0	0	0	0	0	0	0	1	1
0	0	0	1	0	1	0	0	0	1	0	0	0	0	1	0
0	0	0	1	1	1	0	0	0	1	0	0	0	0	1	1
0	0	0	1	0	1	0	0	0	0	0	0	0	0	1	1
0	0	0	1	0	1	0	0	0	0	0	0	0	0	1	1
0	0	0	1	0	1	1	0	0	0	0	0	0	0	0	1
0	0	0	1	0	0	0	0	1	0	0	0	0	0	0	1
0	0	0	1	0	0	0	0	0	1	0	0	0	0	0	1
0	0	0	1	0	0	0	0	0	1	0	0	0	0	0	1
0	1	0	0	0	1	1	0	0	0	1	0	0	0	1	1
0	1	0	0	0	1	0	0	0	1	1	0	0	0	1	1
0	1	0	0	1	1	0	0	0	1	1	0	0	0	1	1
0	1	0	0	0	1	0	0	0	1	1	0	0	0	0	1
0	1	0	0	0	0	0	0	1	0	1	0	0	0	0	1
0	1	0	0	0	0	0	0	0	1	1	0	0	0	0	0
0	1	0	0	0	0	0	0	0	1	1	0	0	0	0	1
0	1	0	0	0	1	1	0	0	0	0	0	0	0	1	1
0	1	0	0	1	1	0	0	0	0	0	0	0	0	1	1
0	1	0	0	0	1	0	0	0	1	0	0	0	0	1	1
0	1	0	0	1	1	0	0	0	1	0	0	0	0	1	1
0	1	0	0	0	1	0	0	0	0	0	0	0	0	1	1
0	1	0	0	0	1	0	0	0	0	0	0	0	0	1	1
0	1	0	0	0	1	1	0	0	0	0	0	0	0	0	1
0	1	0	0	0	0	0	0	1	0	0	0	0	0	0	1
0	1	0	0	0	0	0	0	0	1	0	0	0	0	0	1
0	1	0	0	0	0	0	0	0	1	0	0	0	0	0	1
0	0	0	1	0	1	1	0	0	0	0	0	0	0	1	1
0	0	0	1	0	1	0	0	0	1	0	0	0	0	1	0
0	0	0	1	1	1	0	0	0	1	0	0	0	0	1	0
0	0	0	1	0	1	0	0	0	1	0	0	0	0	0	0
0	0	0	1	0	0	0	0	1	0	0	0	0	0	0	0
0	0	0	1	0	0	0	0	0	1	0	0	0	0	0	0
0	0	0	1	0	0	0	0	0	1	0	0	0	0	0	0
1	0	0	0	0	1	1	0	0	0	0	0	0	0	1	1
1	0	0	0	1	1	0	0	0	0	0	0	0	0	1	1
1	0	0	0	0	1	0	0	0	1	0	0	0	0	1	1
1	0	0	0	1	1	0	0	0	1	0	0	0	0	1	1
1	0	0	0	0	1	0	0	0	0	0	0	0	0	1	0
1	0	0	0	0	1	0	0	0	0	0	0	0	0	1	1
1	0	0	0	0	1	1	0	0	0	0	0	0	0	0	1
1	0	0	0	0	0	0	0	1	0	0	0	0	0	0	0
1	0	0	0	0	0	0	0	0	1	0	0	0	0	0	1
1	0	0	0	0	0	0	0	0	1	0	0	0	0	0	0
1	0	0	0	0	1	1	0	0	0	0	1	0	0	1	1
1	0	0	0	0	1	0	0	0	1	0	1	0	0	1	1
1	0	0	0	1	1	0	0	0	1	0	1	0	0	1	0
1	0	0	0	0	1	0	0	0	1	0	1	0	0	0	0
1	0	0	0	0	0	0	0	1	0	0	1	0	0	0	1
1	0	0	0	0	0	0	0	0	1	0	1	0	0	0	1
1	0	0	0	0	0	0	0	0	1	0	1	0	0	0	0
0	0	0	0	0	1	1	0	0	0	0	1	0	0	1	0
0	0	0	0	0	1	0	0	0	1	0	1	0	0	1	0
0	0	0	0	1	1	0	0	0	1	0	1	0	0	1	0
0	0	0	0	0	1	0	0	0	1	0	1	0	0	0	0
0	0	0	0	0	0	0	0	1	0	0	1	0	0	0	0
0	0	0	0	0	0	0	0	0	1	0	1	0	0	0	0
0	0	0	0	0	0	0	0	0	1	0	1	0	0	0	0
1	0	0	0	0	1	1	0	0	0	0	1	0	0	1	1
1	0	0	0	0	1	0	0	0	1	0	1	0	0	1	1
1	0	0	0	1	1	0	0	0	1	0	1	0	0	1	1
1	0	0	0	0	1	0	0	0	1	0	1	0	0	0	1
1	0	0	0	0	0	0	0	1	0	0	1	0	0	0	0
1	0	0	0	0	0	0	0	0	1	0	1	0	0	0	1
1	0	0	0	0	0	0	0	0	1	0	1	0	0	0	1
0	0	0	1	0	1	1	0	0	0	0	0	0	0	1	1
0	0	0	1	0	1	0	0	0	1	0	0	0	0	1	1
0	0	0	1	1	1	0	0	0	1	0	0	0	0	1	1
0	0	0	1	0	1	1	0	0	0	0	0	0	0	0	1
0	0	0	1	0	1	1	0	0	1	0	0	0	0	0	1
0	0	0	1	0	0	0	0	1	0	0	0	0	0	0	1
0	0	0	1	0	0	0	0	0	1	0	0	0	0	0	1
0	0	0	1	0	0	0	0	0	1	0	0	0	0	0	0
1	0	0	0	0	1	1	0	0	0	0	1	0	0	1	1
1	0	0	0	0	1	0	0	0	1	0	1	0	0	1	0
1	0	0	0	1	1	0	0	0	1	0	1	0	0	1	0
1	0	0	0	0	1	0	0	0	1	0	1	0	0	0	0
1	0	0	0	0	0	0	0	1	0	0	1	0	0	0	1
1	0	0	0	0	0	0	0	0	1	0	1	0	0	0	1
1	0	0	0	0	0	0	0	0	1	0	1	0	0	0	0
1	0	0	0	0	1	1	0	0	0	0	1	0	0	1	1
1	0	0	0	1	1	0	0	0	0	0	1	0	0	1	1
1	0	0	0	0	1	0	0	0	1	0	1	0	0	1	0
1	0	0	0	1	1	0	0	0	1	0	1	0	0	1	1
1	0	0	0	0	1	0	0	0	0	0	1	0	0	1	0
1	0	0	0	0	1	0	0	0	0	0	1	0	0	1	0
1	0	0	0	0	1	1	0	0	0	0	1	0	0	0	0
1	0	0	0	0	0	0	0	1	0	0	1	0	0	0	0
1	0	0	0	0	0	0	0	0	1	0	1	0	0	0	0
1	0	0	0	0	0	0	0	0	1	0	1	0	0	0	0
0	0	0	0	0	1	1	0	0	0	0	0	0	0	1	0
0	0	0	0	1	1	0	0	0	0	0	0	0	0	1	0
0	0	0	0	0	1	0	0	0	1	0	0	0	0	1	0
0	0	0	0	1	1	0	0	0	1	0	0	0	0	1	0
0	0	0	0	0	1	0	0	0	0	0	0	0	0	1	0
0	0	0	0	0	1	0	0	0	0	0	0	0	0	1	0
0	0	0	0	0	1	1	0	0	0	0	0	0	0	0	0
0	0	0	0	0	0	0	0	1	0	0	0	0	0	0	0
0	0	0	0	0	0	0	0	0	1	0	0	0	0	0	0
0	0	0	0	0	0	0	0	0	1	0	0	0	0	0	0
0	0	0	0	0	1	1	0	0	0	0	1	0	0	1	0
0	0	0	0	0	1	0	0	0	1	0	1	0	0	1	0
0	0	0	0	1	1	0	0	0	1	0	1	0	0	1	0
0	0	0	0	0	1	0	0	0	1	0	1	0	0	0	0
0	0	0	0	0	0	0	0	1	0	0	1	0	0	0	0
0	0	0	0	0	0	0	0	0	1	0	1	0	0	0	0
0	0	0	0	0	0	0	0	0	1	0	1	0	0	0	0
0	0	0	1	0	1	1	0	0	0	0	0	0	0	1	1
0	0	0	1	1	1	0	0	0	0	0	0	0	0	1	1
0	0	0	1	0	1	0	0	0	1	0	0	0	0	1	1
0	0	0	1	1	1	0	0	0	1	0	0	0	0	1	1
0	0	0	1	0	1	0	0	0	0	0	0	0	0	1	1
0	0	0	1	0	1	0	0	0	0	0	0	0	0	1	0
0	0	0	1	0	1	1	0	0	0	0	0	0	0	0	1
0	0	0	1	0	0	0	0	1	0	0	0	0	0	0	1
0	0	0	1	0	0	0	0	0	1	0	0	0	0	0	1
0	0	0	1	0	0	0	0	0	1	0	0	0	0	0	0
1	0	0	0	0	1	1	0	0	0	0	0	0	0	1	1
1	0	0	0	1	1	0	0	0	0	0	0	0	0	1	1
1	0	0	0	0	1	0	0	0	1	0	0	0	0	1	1
1	0	0	0	1	1	0	0	0	1	0	0	0	0	1	1
1	0	0	0	0	1	0	0	0	0	0	0	0	0	1	1
1	0	0	0	0	1	0	0	0	0	0	0	0	0	1	1
1	0	0	0	0	1	1	0	0	0	0	0	0	0	0	1
1	0	0	0	0	0	0	0	1	0	0	0	0	0	0	1
1	0	0	0	0	0	0	0	0	1	0	0	0	0	0	1
1	0	0	0	0	0	0	0	0	1	0	0	0	0	0	0
0	0	0	0	0	1	1	0	0	0	0	1	0	0	1	0
0	0	0	0	0	1	0	0	0	1	0	1	0	0	1	0
0	0	0	0	1	1	0	0	0	1	0	1	0	0	1	0
0	0	0	0	0	1	0	0	0	1	0	1	0	0	0	0
0	0	0	0	0	0	0	0	1	0	0	1	0	0	0	0
0	0	0	0	0	0	0	0	0	1	0	1	0	0	0	0
0	0	0	0	0	0	0	0	0	1	0	1	0	0	0	0
0	0	0	1	0	1	1	0	0	0	0	1	0	0	1	1
0	0	0	1	1	1	0	0	0	0	0	1	0	0	1	0
0	0	0	1	0	1	0	0	0	1	0	1	0	0	1	0
0	0	0	1	1	1	0	0	0	1	0	1	0	0	1	0
0	0	0	1	0	1	0	0	0	0	0	1	0	0	1	0
0	0	0	1	0	1	0	0	0	0	0	1	0	0	1	0
0	0	0	1	0	1	1	0	0	0	0	1	0	0	0	1
0	0	0	1	0	0	0	0	1	0	0	1	0	0	0	0
0	0	0	1	0	0	0	0	0	1	0	1	0	0	0	1
0	0	0	1	0	0	0	0	0	1	0	1	0	0	0	0
1	0	0	0	0	1	1	0	0	0	0	0	0	0	1	1
1	0	0	0	1	1	0	0	0	0	0	0	0	0	1	1
1	0	0	0	0	1	0	0	0	1	0	0	0	0	1	1
1	0	0	0	1	1	0	0	0	1	0	0	0	0	1	1
1	0	0	0	0	1	0	0	0	0	0	0	0	0	1	1
1	0	0	0	0	1	0	0	0	0	0	0	0	0	1	1
1	0	0	0	0	1	1	0	0	0	0	0	0	0	0	1
1	0	0	0	0	0	0	0	1	0	0	0	0	0	0	1
1	0	0	0	0	0	0	0	0	1	0	0	0	0	0	1
1	0	0	0	0	0	0	0	0	1	0	0	0	0	0	0
0	0	0	1	0	1	1	0	0	0	0	0	0	0	1	1
0	0	0	1	0	1	0	0	0	1	0	0	0	0	1	1
0	0	0	1	1	1	0	0	0	1	0	0	0	0	1	1
0	0	0	1	0	1	0	0	0	1	0	0	0	0	0	0
0	0	0	1	0	0	0	0	1	0	0	0	0	0	0	0
0	0	0	1	0	0	0	0	0	1	0	0	0	0	0	0
0	0	0	1	0	0	0	0	0	1	0	0	0	0	0	0
0	0	0	1	0	1	1	0	0	0	0	0	0	0	1	1
0	0	0	1	0	1	0	0	0	1	0	0	0	0	1	1
0	0	0	1	1	1	0	0	0	1	0	0	0	0	1	1
0	0	0	1	0	1	0	0	0	1	0	0	0	0	0	0
0	0	0	1	0	0	0	0	1	0	0	0	0	0	0	0
0	0	0	1	0	0	0	0	0	1	0	0	0	0	0	0
0	0	0	1	0	0	0	0	0	1	0	0	0	0	0	0
0	0	0	1	0	1	1	0	0	0	0	0	0	0	1	1
0	0	0	1	0	1	0	0	0	1	0	0	0	0	1	0
0	0	0	1	1	1	0	0	0	1	0	0	0	0	1	0
0	0	0	1	0	1	0	0	0	1	0	0	0	0	0	0
0	0	0	1	0	0	0	0	1	0	0	0	0	0	0	0
0	0	0	1	0	0	0	0	0	1	0	0	0	0	0	1
0	0	0	1	0	0	0	0	0	1	0	0	0	0	0	1
0	1	0	0	0	1	1	0	0	0	0	0	0	0	1	1
0	1	0	0	1	1	0	0	0	0	0	0	0	0	1	1
0	1	0	0	0	1	0	0	0	1	0	0	0	0	1	0
0	1	0	0	1	1	0	0	0	1	0	0	0	0	1	0
0	1	0	0	0	1	0	0	0	0	0	0	0	0	1	0
0	1	0	0	0	1	0	0	0	0	0	0	0	0	1	0
0	1	0	0	0	1	1	0	0	0	0	0	0	0	0	1
0	1	0	0	0	0	0	0	1	0	0	0	0	0	0	0
0	1	0	0	0	0	0	0	0	1	0	0	0	0	0	1
0	1	0	0	0	0	0	0	0	1	0	0	0	0	0	0
0	0	0	0	0	1	1	0	0	0	0	0	0	0	1	0
0	0	0	0	0	1	0	0	0	1	0	0	0	0	1	0
0	0	0	0	1	1	0	0	0	1	0	0	0	0	1	0
0	0	0	0	0	1	0	0	0	1	0	0	0	0	0	0
0	0	0	0	0	0	0	0	1	0	0	0	0	0	0	0
0	0	0	0	0	0	0	0	0	1	0	0	0	0	0	0
0	0	0	0	0	0	0	0	0	1	0	0	0	0	0	0
0	0	0	0	0	1	1	0	0	0	0	0	0	0	1	0
0	0	0	0	1	1	0	0	0	0	0	0	0	0	1	0
0	0	0	0	0	1	0	0	0	1	0	0	0	0	1	0
0	0	0	0	1	1	0	0	0	1	0	0	0	0	1	0
0	0	0	0	0	1	0	0	0	0	0	0	0	0	1	0
0	0	0	0	0	1	0	0	0	0	0	0	0	0	1	0
0	0	0	0	0	1	1	0	0	0	0	0	0	0	0	0
0	0	0	0	0	0	0	0	1	0	0	0	0	0	0	0
0	0	0	0	0	0	0	0	0	1	0	0	0	0	0	0
0	0	0	0	0	0	0	0	0	1	0	0	0	0	0	0
0	0	1	0	0	1	1	0	0	0	0	0	0	1	1	1
0	0	1	0	0	1	0	0	0	1	0	0	0	1	1	1
0	0	1	0	1	1	0	0	0	1	0	0	0	1	1	1
0	0	1	0	0	1	0	0	0	1	0	0	0	1	0	0
0	0	1	0	0	0	0	0	1	0	0	0	0	1	0	0
0	0	1	0	0	0	0	0	0	1	0	0	0	1	0	1
0	0	1	0	0	0	0	0	0	1	0	0	0	1	0	0
0	0	1	0	0	1	1	0	0	0	1	0	0	0	1	0
0	0	1	0	1	1	0	0	0	0	1	0	0	0	1	1
0	0	1	0	0	1	0	0	0	1	1	0	0	0	1	0
0	0	1	0	1	1	0	0	0	1	1	0	0	0	1	1
0	0	1	0	0	1	0	0	0	0	1	0	0	0	1	0
0	0	1	0	0	1	0	0	0	0	1	0	0	0	1	0
0	0	1	0	0	1	1	0	0	0	1	0	0	0	0	0
0	0	1	0	0	0	0	0	1	0	1	0	0	0	0	0
0	0	1	0	0	0	0	0	0	1	1	0	0	0	0	0
0	0	1	0	0	0	0	0	0	1	1	0	0	0	0	0
0	0	0	1	0	1	1	0	0	0	0	1	0	0	1	1
0	0	0	1	0	1	0	0	0	1	0	1	0	0	1	1
0	0	0	1	1	1	0	0	0	1	0	1	0	0	1	1
0	0	0	1	0	1	0	0	0	1	0	1	0	0	0	1
0	0	0	1	0	0	0	0	1	0	0	1	0	0	0	0
0	0	0	1	0	0	0	0	0	1	0	1	0	0	0	1
0	0	0	1	0	0	0	0	0	1	0	1	0	0	0	1
0	0	0	1	0	1	1	0	0	0	0	0	0	0	1	0
0	0	0	1	1	1	0	0	0	0	0	0	0	0	1	0
0	0	0	1	0	1	0	0	0	1	0	0	0	0	1	0
0	0	0	1	1	1	0	0	0	1	0	0	0	0	1	0
0	0	0	1	0	1	0	0	0	0	0	0	0	0	1	0
0	0	0	1	0	1	0	0	0	0	0	0	0	0	1	0
0	0	0	1	0	1	1	0	0	1	0	0	0	0	0	0
0	0	0	1	0	1	1	0	0	0	0	0	0	0	0	0
0	0	0	1	0	0	0	0	1	0	0	0	0	0	0	0
0	0	0	1	0	0	0	0	0	1	0	0	0	0	0	1
0	0	0	1	0	0	0	0	0	1	0	0	0	0	0	0
1	0	0	0	0	1	1	0	0	0	0	0	0	0	1	1
1	0	0	0	0	1	0	0	0	1	0	0	0	0	1	1
1	0	0	0	1	1	0	0	0	1	0	0	0	0	1	0
1	0	0	0	0	1	0	0	0	1	0	0	0	0	0	0
1	0	0	0	0	0	0	0	1	0	0	0	0	0	0	1
1	0	0	0	0	0	0	0	0	1	0	0	0	0	0	0
1	0	0	0	0	0	0	0	0	1	0	0	0	0	0	0
0	0	0	0	0	1	1	0	0	0	0	0	0	0	1	0
0	0	0	0	0	1	0	0	0	1	0	0	0	0	1	0
0	0	0	0	1	1	0	0	0	1	0	0	0	0	1	0
0	0	0	0	0	1	1	0	0	0	0	0	0	0	0	0
0	0	0	0	0	1	1	0	0	1	0	0	0	0	0	0
0	0	0	0	0	0	0	0	1	0	0	0	0	0	0	0
0	0	0	0	0	0	0	0	0	1	0	0	0	0	0	0
0	0	0	0	0	0	0	0	0	1	0	0	0	0	0	0
0	0	0	0	0	1	0	0	0	1	0	0	0	1	1	0
0	0	0	0	1	1	0	0	0	1	0	0	0	1	1	0
0	0	0	0	0	1	1	0	0	0	0	0	0	1	0	0
0	0	0	0	0	1	1	0	0	1	0	0	0	1	0	0
0	0	0	0	0	0	0	0	1	0	0	0	0	1	0	0
0	0	0	0	0	0	0	0	0	1	0	0	0	1	0	0
0	0	0	1	0	1	1	0	0	0	0	1	0	0	1	1
0	0	0	1	0	1	0	0	0	1	0	1	0	0	1	0
0	0	0	1	1	1	0	0	0	1	0	1	0	0	1	0
0	0	0	1	0	1	0	0	0	1	0	1	0	0	0	0
0	0	0	1	0	0	0	0	1	0	0	1	0	0	0	0
0	0	0	1	0	0	0	0	0	1	0	1	0	0	0	0
0	0	0	1	0	0	0	0	0	1	0	1	0	0	0	0
1	0	0	0	0	1	1	0	0	0	0	0	0	0	1	1
1	0	0	0	1	1	0	0	0	0	0	0	0	0	1	1
1	0	0	0	0	1	0	0	0	1	0	0	0	0	1	1
1	0	0	0	1	1	0	0	0	1	0	0	0	0	1	1
1	0	0	0	0	1	0	0	0	0	0	0	0	0	1	1
1	0	0	0	0	1	0	0	0	0	0	0	0	0	1	1
1	0	0	0	0	1	1	0	0	0	0	0	0	0	0	1
1	0	0	0	0	0	0	0	1	0	0	0	0	0	0	1
1	0	0	0	0	0	0	0	0	1	0	0	0	0	0	1
1	0	0	0	0	0	0	0	0	1	0	0	0	0	0	1
0	0	0	1	0	1	1	0	0	0	0	0	0	0	1	1
0	0	0	1	0	1	0	0	0	1	0	0	0	0	1	0
0	0	0	1	1	1	0	0	0	1	0	0	0	0	1	0
0	0	0	1	0	1	0	0	0	1	0	0	0	0	0	1
0	0	0	1	0	0	0	0	1	0	0	0	0	0	0	0
0	0	0	1	0	0	0	0	0	1	0	0	0	0	0	1
0	0	0	1	0	0	0	0	0	1	0	0	0	0	0	1
0	0	0	1	0	1	1	0	0	0	0	0	0	0	1	0
0	0	0	1	0	1	0	0	0	1	0	0	0	0	1	1
0	0	0	1	1	1	0	0	0	1	0	0	0	0	1	1
0	0	0	1	0	1	1	0	0	0	0	0	0	0	0	1
0	0	0	1	0	1	1	0	0	1	0	0	0	0	0	1
0	0	0	1	0	0	0	0	1	0	0	0	0	0	0	0
0	0	0	1	0	0	0	0	0	1	0	0	0	0	0	0
0	0	0	1	0	0	0	0	0	1	0	0	0	0	0	0
0	1	0	0	0	1	1	0	0	0	0	0	0	0	1	1
0	1	0	0	1	1	0	0	0	0	0	0	0	0	1	1
0	1	0	0	0	1	0	0	0	1	0	0	0	0	1	0
0	1	0	0	1	1	0	0	0	1	0	0	0	0	1	1
0	1	0	0	0	1	0	0	0	0	0	0	0	0	1	0
0	1	0	0	0	1	0	0	0	0	0	0	0	0	1	0
0	1	0	0	0	1	1	0	0	0	0	0	0	0	0	1
0	1	0	0	0	0	0	0	1	0	0	0	0	0	0	0
0	1	0	0	0	0	0	0	0	1	0	0	0	0	0	0
0	1	0	0	0	0	0	0	0	1	0	0	0	0	0	0
0	1	0	0	0	1	1	0	0	0	0	0	0	0	1	1
0	1	0	0	0	1	0	0	0	1	0	0	0	0	1	0
0	1	0	0	1	1	0	0	0	1	0	0	0	0	1	0
0	1	0	0	0	0	0	0	1	0	0	0	0	0	0	1
0	1	0	0	0	0	0	0	0	1	0	0	0	0	0	0
0	1	0	0	0	0	0	0	0	1	0	0	0	0	0	0
0	0	0	1	0	1	1	0	0	0	0	1	0	0	1	1
0	0	0	1	0	1	0	0	0	1	0	1	0	0	1	0
0	0	0	1	1	1	0	0	0	1	0	1	0	0	1	0
0	0	0	1	0	1	0	0	0	1	0	1	0	0	0	0
0	0	0	1	0	0	0	0	1	0	0	1	0	0	0	0
0	0	0	1	0	0	0	0	0	1	0	1	0	0	0	0
0	0	0	1	0	0	0	0	0	1	0	1	0	0	0	0
0	0	0	0	0	1	1	0	0	0	0	0	0	0	1	1
0	0	0	0	1	1	0	0	0	0	0	0	0	0	1	1
0	0	0	0	0	1	0	0	0	1	0	0	0	0	1	1
0	0	0	0	1	1	0	0	0	1	0	0	0	0	1	1
0	0	0	0	0	1	0	0	0	0	0	0	0	0	1	1
0	0	0	0	0	1	0	0	0	0	0	0	0	0	1	1
0	0	0	0	0	1	1	0	0	0	0	0	0	0	0	1
0	0	0	0	0	0	0	0	1	0	0	0	0	0	0	0
0	0	0	0	0	0	0	0	0	1	0	0	0	0	0	0
0	0	0	0	0	0	0	0	0	1	0	0	0	0	0	0
0	0	0	1	0	1	1	0	0	0	0	0	0	0	1	1
0	0	0	1	0	1	0	0	0	1	0	0	0	0	1	0
0	0	0	1	1	1	0	0	0	1	0	0	0	0	1	0
0	0	0	1	0	1	1	0	0	0	0	0	0	0	0	0
0	0	0	1	0	1	1	0	0	1	0	0	0	0	0	0
0	0	0	1	0	0	0	0	1	0	0	0	0	0	0	1
0	0	0	1	0	0	0	0	0	1	0	0	0	0	0	1
0	0	0	1	0	0	0	0	0	1	0	0	0	0	0	0
0	1	0	0	0	1	1	0	0	0	0	0	0	0	1	1
0	1	0	0	0	1	0	0	0	1	0	0	0	0	1	1
0	1	0	0	1	1	0	0	0	1	0	0	0	0	1	0
0	1	0	0	0	1	1	0	0	0	0	0	0	0	0	1
0	1	0	0	0	1	1	0	0	1	0	0	0	0	0	1
0	1	0	0	0	0	0	0	1	0	0	0	0	0	0	1
0	1	0	0	0	0	0	0	0	1	0	0	0	0	0	1
0	1	0	0	0	0	0	0	0	1	0	0	0	0	0	0
0	0	0	1	0	1	1	0	0	0	0	0	0	0	1	0
0	0	0	1	1	1	0	0	0	0	0	0	0	0	1	1
0	0	0	1	0	1	0	0	0	1	0	0	0	0	1	1
0	0	0	1	1	1	0	0	0	1	0	0	0	0	1	0
0	0	0	1	0	1	0	0	0	0	0	0	0	0	1	1
0	0	0	1	0	1	0	0	0	0	0	0	0	0	1	1
0	0	0	1	0	1	1	0	0	0	0	0	0	0	0	1
0	0	0	1	0	0	0	0	1	0	0	0	0	0	0	0
0	0	0	1	0	0	0	0	0	1	0	0	0	0	0	0
0	0	0	1	0	0	0	0	0	1	0	0	0	0	0	1
1	0	0	0	0	1	1	0	0	0	0	0	0	0	1	1
1	0	0	0	1	1	0	0	0	0	0	0	0	0	1	1
1	0	0	0	0	1	0	0	0	1	0	0	0	0	1	1
1	0	0	0	1	1	0	0	0	1	0	0	0	0	1	1
1	0	0	0	0	1	0	0	0	0	0	0	0	0	1	1
1	0	0	0	0	1	0	0	0	0	0	0	0	0	1	0
1	0	0	0	0	1	1	0	0	0	0	0	0	0	0	0
1	0	0	0	0	0	0	0	1	0	0	0	0	0	0	0
1	0	0	0	0	0	0	0	0	1	0	0	0	0	0	0
1	0	0	0	0	0	0	0	0	1	0	0	0	0	0	0
0	0	0	0	0	1	1	0	0	0	0	0	0	0	1	0
0	0	0	0	0	1	0	0	0	1	0	0	0	0	1	0
0	0	0	0	1	1	0	0	0	1	0	0	0	0	1	0
0	0	0	0	0	1	0	0	0	1	0	0	0	0	0	0
0	0	0	0	0	0	0	0	1	0	0	0	0	0	0	0
0	0	0	0	0	0	0	0	0	1	0	0	0	0	0	1
0	0	0	0	0	0	0	0	0	1	0	0	0	0	0	0
0	0	0	1	0	1	1	0	0	0	0	0	0	0	1	1
0	0	0	1	0	1	0	0	0	1	0	0	0	0	1	1
0	0	0	1	1	1	0	0	0	1	0	0	0	0	1	1
0	0	0	1	0	1	0	0	0	1	0	0	0	0	0	0
0	0	0	1	0	0	0	0	1	0	0	0	0	0	0	0
0	0	0	1	0	0	0	0	0	1	0	0	0	0	0	0
0	0	0	1	0	0	0	0	0	1	0	0	0	0	0	0
0	1	0	0	0	1	1	0	0	0	0	0	0	0	1	1
0	1	0	0	1	1	0	0	0	0	0	0	0	0	1	1
0	1	0	0	0	1	0	0	0	1	0	0	0	0	1	0
0	1	0	0	1	1	0	0	0	1	0	0	0	0	1	1
0	1	0	0	0	1	0	0	0	0	0	0	0	0	1	1
0	1	0	0	0	1	0	0	0	0	0	0	0	0	1	1
0	1	0	0	0	1	1	0	0	0	0	0	0	0	0	1
0	1	0	0	0	0	0	0	1	0	0	0	0	0	0	1
0	1	0	0	0	0	0	0	0	1	0	0	0	0	0	1
0	1	0	0	0	0	0	0	0	1	0	0	0	0	0	0
0	1	0	0	0	1	1	0	0	0	0	0	0	0	1	1
0	1	0	0	0	1	0	0	0	1	0	0	0	0	1	1
0	1	0	0	1	1	0	0	0	1	0	0	0	0	1	1
0	1	0	0	0	1	1	0	0	0	0	0	0	0	0	1
0	1	0	0	0	1	1	0	0	1	0	0	0	0	0	1
0	1	0	0	0	0	0	0	1	0	0	0	0	0	0	0
0	1	0	0	0	0	0	0	0	1	0	0	0	0	0	1
0	1	0	0	0	0	0	0	0	1	0	0	0	0	0	0
0	0	0	1	0	1	1	0	0	0	0	1	0	0	1	0
0	0	0	1	1	1	0	0	0	0	0	1	0	0	1	1
0	0	0	1	0	1	0	0	0	1	0	1	0	0	1	0
0	0	0	1	1	1	0	0	0	1	0	1	0	0	1	0
0	0	0	1	0	1	0	0	0	0	0	1	0	0	1	0
0	0	0	1	0	1	0	0	0	0	0	1	0	0	1	0
0	0	0	1	0	1	1	0	0	0	0	1	0	0	0	0
0	0	0	1	0	0	0	0	1	0	0	1	0	0	0	0
0	0	0	1	0	0	0	0	0	1	0	1	0	0	0	0
0	0	0	1	0	0	0	0	0	1	0	1	0	0	0	0
0	1	0	0	0	1	1	0	0	0	0	1	0	0	1	1
0	1	0	0	1	1	0	0	0	0	0	1	0	0	1	1
0	1	0	0	0	1	0	0	0	1	0	1	0	0	1	1
0	1	0	0	1	1	0	0	0	1	0	1	0	0	1	1
0	1	0	0	0	1	0	0	0	0	0	1	0	0	1	1
0	1	0	0	0	1	0	0	0	0	0	1	0	0	1	1
0	1	0	0	0	1	1	0	0	0	0	1	0	0	0	1
0	1	0	0	0	0	0	0	1	0	0	1	0	0	0	1
0	1	0	0	0	0	0	0	0	1	0	1	0	0	0	1
0	1	0	0	0	0	0	0	0	1	0	1	0	0	0	0
1	0	0	0	0	1	1	0	0	0	0	1	0	0	1	1
1	0	0	0	0	1	0	0	0	1	0	1	0	0	1	1
1	0	0	0	1	1	0	0	0	1	0	1	0	0	1	1
1	0	0	0	0	1	0	0	0	1	0	1	0	0	0	1
1	0	0	0	0	0	0	0	1	0	0	1	0	0	0	1
1	0	0	0	0	0	0	0	0	1	0	1	0	0	0	0
1	0	0	0	0	0	0	0	0	1	0	1	0	0	0	1
1	0	0	0	0	1	1	0	0	0	0	1	0	0	1	1
1	0	0	0	0	1	0	0	0	1	0	1	0	0	1	0
1	0	0	0	1	1	0	0	0	1	0	1	0	0	1	0
1	0	0	0	0	1	1	0	0	0	0	1	0	0	0	1
1	0	0	0	0	1	1	0	0	1	0	1	0	0	0	1
1	0	0	0	0	0	0	0	1	0	0	1	0	0	0	1
1	0	0	0	0	0	0	0	0	1	0	1	0	0	0	1
1	0	0	0	0	0	0	0	0	1	0	1	0	0	0	0
1	0	0	0	0	1	1	0	0	0	0	0	0	0	1	1
1	0	0	0	0	1	0	0	0	1	0	0	0	0	1	1
1	0	0	0	1	1	0	0	0	1	0	0	0	0	1	1
1	0	0	0	0	1	1	0	0	0	0	0	0	0	0	1
1	0	0	0	0	1	1	0	0	1	0	0	0	0	0	1
1	0	0	0	0	0	0	0	1	0	0	0	0	0	0	1
1	0	0	0	0	0	0	0	0	1	0	0	0	0	0	0
1	0	0	0	0	0	0	0	0	1	0	0	0	0	0	0
0	0	0	1	0	1	1	0	0	0	0	1	0	0	1	1
0	0	0	1	1	1	0	0	0	0	0	1	0	0	1	0
0	0	0	1	0	1	0	0	0	1	0	1	0	0	1	1
0	0	0	1	1	1	0	0	0	1	0	1	0	0	1	0
0	0	0	1	0	1	0	0	0	0	0	1	0	0	1	0
0	0	0	1	0	1	0	0	0	0	0	1	0	0	1	0
0	0	0	1	0	1	1	0	0	0	0	1	0	0	0	1
0	0	0	1	0	0	0	0	1	0	0	1	0	0	0	1
0	0	0	1	0	0	0	0	0	1	0	1	0	0	0	0
0	0	0	1	0	0	0	0	0	1	0	1	0	0	0	0
0	0	0	1	0	1	1	0	0	0	0	0	0	0	1	1
0	0	0	1	0	1	0	0	0	1	0	0	0	0	1	1
0	0	0	1	1	1	0	0	0	1	0	0	0	0	1	1
0	0	0	1	0	1	1	0	0	0	0	0	0	0	0	1
0	0	0	1	0	1	1	0	0	1	0	0	0	0	0	1
0	0	0	1	0	0	0	0	1	0	0	0	0	0	0	1
0	0	0	1	0	0	0	0	0	1	0	0	0	0	0	1
0	0	0	1	0	0	0	0	0	1	0	0	0	0	0	0
0	1	0	0	0	1	1	0	0	0	0	1	0	0	1	1
0	1	0	0	0	1	0	0	0	1	0	1	0	0	1	0
0	1	0	0	1	1	0	0	0	1	0	1	0	0	1	1
0	1	0	0	0	1	0	0	0	1	0	1	0	0	0	0
0	1	0	0	0	0	0	0	1	0	0	1	0	0	0	1
0	1	0	0	0	0	0	0	0	1	0	1	0	0	0	0
0	1	0	0	0	0	0	0	0	1	0	1	0	0	0	0
1	0	0	0	0	1	1	0	0	0	0	0	0	0	1	1
1	0	0	0	1	1	0	0	0	0	0	0	0	0	1	1
1	0	0	0	0	1	0	0	0	1	0	0	0	0	1	0
1	0	0	0	1	1	0	0	0	1	0	0	0	0	1	1
1	0	0	0	0	1	0	0	0	0	0	0	0	0	1	1
1	0	0	0	0	1	0	0	0	0	0	0	0	0	1	1
1	0	0	0	0	1	1	0	0	0	0	0	0	0	0	1
1	0	0	0	0	0	0	0	1	0	0	0	0	0	0	0
1	0	0	0	0	0	0	0	0	1	0	0	0	0	0	1
1	0	0	0	0	0	0	0	0	1	0	0	0	0	0	0
0	0	0	0	0	1	1	0	0	0	0	0	0	0	1	0
0	0	0	0	0	1	0	0	0	1	0	0	0	0	1	0
0	0	0	0	1	1	0	0	0	1	0	0	0	0	1	0
0	0	0	0	0	1	1	0	0	0	0	0	0	0	0	0
0	0	0	0	0	1	1	0	0	1	0	0	0	0	0	0
0	0	0	0	0	0	0	0	1	0	0	0	0	0	0	0
0	0	0	0	0	0	0	0	0	1	0	0	0	0	0	0
0	0	0	0	0	0	0	0	0	1	0	0	0	0	0	0
0	0	0	0	0	1	1	0	0	0	0	0	0	0	1	0
0	0	0	0	0	1	0	0	0	1	0	0	0	0	1	1
0	0	0	0	1	1	0	0	0	1	0	0	0	0	1	0
0	0	0	0	0	1	0	0	0	1	0	0	0	0	0	0
0	0	0	0	0	0	0	0	1	0	0	0	0	0	0	0
0	0	0	0	0	0	0	0	0	1	0	0	0	0	0	0
0	0	0	0	0	0	0	0	0	1	0	0	0	0	0	0
0	1	0	0	0	1	1	0	0	0	0	0	0	0	1	0
0	1	0	0	1	1	0	0	0	0	0	0	0	0	1	0
0	1	0	0	0	1	0	0	0	1	0	0	0	0	1	0
0	1	0	0	1	1	0	0	0	1	0	0	0	0	1	0
0	1	0	0	0	1	0	0	0	0	0	0	0	0	1	0
0	1	0	0	0	1	0	0	0	0	0	0	0	0	1	0
0	1	0	0	0	1	1	0	0	0	0	0	0	0	0	0
0	1	0	0	0	0	0	0	1	0	0	0	0	0	0	0
0	1	0	0	0	0	0	0	0	1	0	0	0	0	0	0
0	1	0	0	0	0	0	0	0	1	0	0	0	0	0	0
1	0	0	0	0	1	1	0	0	0	0	1	0	0	1	1
1	0	0	0	0	1	0	0	0	1	0	1	0	0	1	1
1	0	0	0	1	1	0	0	0	1	0	1	0	0	1	1
1	0	0	0	0	1	1	0	0	0	0	1	0	0	0	1
1	0	0	0	0	1	1	0	0	1	0	1	0	0	0	1
1	0	0	0	0	0	0	0	1	0	0	1	0	0	0	0
1	0	0	0	0	0	0	0	0	1	0	1	0	0	0	0
1	0	0	0	0	0	0	0	0	1	0	1	0	0	0	0
0	0	0	0	0	1	1	0	0	0	0	1	0	1	1	0
0	0	0	0	1	1	0	0	0	0	0	1	0	1	1	0
0	0	0	0	0	1	0	0	0	1	0	1	0	1	1	0
0	0	0	0	1	1	0	0	0	1	0	1	0	1	1	0
0	0	0	0	0	1	0	0	0	0	0	1	0	1	1	0
0	0	0	0	0	1	0	0	0	0	0	1	0	1	1	0
0	0	0	0	0	1	1	0	0	0	0	1	0	1	0	0
0	0	0	0	0	0	0	0	1	0	0	1	0	1	0	0
0	0	0	0	0	0	0	0	0	1	0	1	0	1	0	0
0	0	0	0	0	0	0	0	0	1	0	1	0	1	0	0
0	0	0	0	0	1	1	0	0	0	0	1	0	0	1	0
0	0	0	0	1	1	0	0	0	0	0	1	0	0	1	0
0	0	0	0	0	1	0	0	0	1	0	1	0	0	1	0
0	0	0	0	1	1	0	0	0	1	0	1	0	0	1	0
0	0	0	0	0	1	0	0	0	0	0	1	0	0	1	0
0	0	0	0	0	1	0	0	0	0	0	1	0	0	1	0
0	0	0	0	0	1	1	0	0	0	0	1	0	0	0	0
0	0	0	0	0	0	0	0	1	0	0	1	0	0	0	0
0	0	0	0	0	0	0	0	0	1	0	1	0	0	0	0
0	0	0	0	0	0	0	0	0	1	0	1	0	0	0	0
1	0	0	0	0	1	1	0	0	0	0	1	0	0	1	1
1	0	0	0	0	1	0	0	0	1	0	1	0	0	1	0
1	0	0	0	1	1	0	0	0	1	0	1	0	0	1	1
1	0	0	0	0	1	0	0	0	1	0	1	0	0	0	0
1	0	0	0	0	0	0	0	1	0	0	1	0	0	0	0
1	0	0	0	0	0	0	0	0	1	0	1	0	0	0	0
1	0	0	0	0	0	0	0	0	1	0	1	0	0	0	0
1	0	0	0	0	1	1	0	0	0	0	1	0	0	1	1
1	0	0	0	1	1	0	0	0	0	0	1	0	0	1	1
1	0	0	0	0	1	0	0	0	1	0	1	0	0	1	1
1	0	0	0	1	1	0	0	0	1	0	1	0	0	1	1
1	0	0	0	0	1	0	0	0	0	0	1	0	0	1	1
1	0	0	0	0	1	0	0	0	0	0	1	0	0	1	1
1	0	0	0	0	1	1	0	0	0	0	1	0	0	0	1
1	0	0	0	0	0	0	0	1	0	0	1	0	0	0	1
1	0	0	0	0	0	0	0	0	1	0	1	0	0	0	0
1	0	0	0	0	0	0	0	0	1	0	1	0	0	0	0
1	0	0	0	0	1	1	0	0	0	0	1	0	0	1	0
1	0	0	0	1	1	0	0	0	0	0	1	0	0	1	0
1	0	0	0	0	1	0	0	0	1	0	1	0	0	1	0
1	0	0	0	1	1	0	0	0	1	0	1	0	0	1	0
1	0	0	0	0	1	0	0	0	0	0	1	0	0	1	0
1	0	0	0	0	1	0	0	0	0	0	1	0	0	1	0
1	0	0	0	0	1	1	0	0	0	0	1	0	0	0	0
1	0	0	0	0	0	0	0	1	0	0	1	0	0	0	0
1	0	0	0	0	0	0	0	0	1	0	1	0	0	0	0
1	0	0	0	0	0	0	0	0	1	0	1	0	0	0	0
0	0	1	0	0	1	1	0	0	1	0	0	0	0	1	1
0	0	1	0	1	1	0	0	0	0	0	0	0	0	1	1
0	0	1	0	0	1	0	0	0	1	0	0	0	0	0	1
0	0	1	0	1	1	0	0	0	1	0	0	0	0	0	1
0	0	1	0	1	0	0	1	1	0	0	0	0	0	0	1
0	0	1	0	1	0	0	0	1	0	0	0	0	0	0	0
0	0	1	0	0	0	0	0	1	1	0	0	0	0	0	0
0	0	1	0	0	0	0	1	0	0	0	0	0	0	0	1
0	0	1	0	0	0	0	1	0	1	0	0	0	0	0	1
0	0	1	0	1	0	0	0	0	1	0	0	0	0	0	0
0	1	0	0	0	1	1	0	0	1	1	1	0	0	1	1
0	1	0	0	1	1	0	0	0	0	1	1	0	0	1	1
0	1	0	0	1	1	1	0	0	0	1	1	0	0	0	1
0	1	0	0	1	1	1	0	0	1	1	1	0	0	0	1
0	1	0	0	0	1	0	0	0	0	1	1	0	0	0	1
0	1	0	0	1	0	0	1	1	0	1	1	0	0	0	1
0	1	0	0	1	0	0	0	1	0	1	1	0	0	0	1
0	1	0	0	0	0	0	0	1	1	1	1	0	0	0	0
0	1	0	0	0	0	0	1	0	0	1	1	0	0	0	0
0	1	0	0	0	0	0	1	0	1	1	1	0	0	0	1
0	1	0	0	1	0	0	0	0	1	1	1	0	0	0	1
0	0	0	0	0	1	1	0	0	1	0	0	0	0	1	0
0	0	0	0	1	1	0	0	0	0	0	0	0	0	1	0
0	0	0	0	1	1	1	0	0	0	0	0	0	0	0	0
0	0	0	0	1	1	1	0	0	1	0	0	0	0	0	0
0	0	0	0	0	1	0	0	0	0	0	0	0	0	0	0
0	0	0	0	1	0	0	1	1	0	0	0	0	0	0	0
0	0	0	0	1	0	0	0	1	0	0	0	0	0	0	0
0	0	0	0	0	0	0	0	1	1	0	0	0	0	0	0
0	0	0	0	0	0	0	1	0	0	0	0	0	0	0	0
0	0	0	0	0	0	0	1	0	1	0	0	0	0	0	0
0	0	0	0	1	0	0	0	0	1	0	0	0	0	0	0
0	0	0	0	0	1	1	0	0	1	0	0	0	0	1	0
0	0	0	0	1	1	0	0	0	0	0	0	0	0	1	0
0	0	0	0	0	1	0	0	0	1	0	0	0	0	0	0
0	0	0	0	1	1	0	0	0	1	0	0	0	0	0	0
0	0	0	0	1	0	0	1	1	0	0	0	0	0	0	0
0	0	0	0	1	0	0	0	1	0	0	0	0	0	0	0
0	0	0	0	0	0	0	0	1	1	0	0	0	0	0	0
0	0	0	0	0	0	0	1	0	0	0	0	0	0	0	0
0	0	0	0	0	0	0	1	0	1	0	0	0	0	0	0
0	0	0	0	1	0	0	0	0	1	0	0	0	0	0	0
0	0	0	1	0	1	1	0	0	1	0	1	0	0	1	0
0	0	0	1	1	1	0	0	0	0	0	1	0	0	1	0
0	0	0	1	1	1	1	0	0	0	0	1	0	0	0	0
0	0	0	1	1	1	1	0	0	1	0	1	0	0	0	0
0	0	0	1	0	1	0	0	0	0	0	1	0	0	0	0
0	0	0	1	1	0	0	1	1	0	0	1	0	0	0	0
0	0	0	1	1	0	0	0	1	0	0	1	0	0	0	0
0	0	0	1	0	0	0	0	1	1	0	1	0	0	0	0
0	0	0	1	0	0	0	1	0	0	0	1	0	0	0	0
0	0	0	1	0	0	0	1	0	1	0	1	0	0	0	0
0	0	0	1	1	0	0	0	0	1	0	1	0	0	0	1
0	0	0	0	0	1	1	0	0	1	0	1	0	1	1	0
0	0	0	0	1	1	0	0	0	0	0	1	0	1	1	0
0	0	0	0	0	1	0	0	0	1	0	1	0	1	0	0
0	0	0	0	1	1	0	0	0	1	0	1	0	1	0	0
0	0	0	0	1	0	0	1	1	0	0	1	0	1	0	0
0	0	0	0	1	0	0	0	1	0	0	1	0	1	0	0
0	0	0	0	0	0	0	0	1	1	0	1	0	1	0	0
0	0	0	0	0	0	0	1	0	0	0	1	0	1	0	0
0	0	0	0	0	0	0	1	0	1	0	1	0	1	0	0
0	0	0	0	1	0	0	0	0	1	0	1	0	1	0	0
0	0	1	0	0	1	1	0	0	1	0	1	0	0	1	1
0	0	1	0	1	1	0	0	0	0	0	1	0	0	1	1
0	0	1	0	0	1	0	0	0	1	0	1	0	0	0	1
0	0	1	0	1	1	0	0	0	1	0	1	0	0	0	1
0	0	1	0	1	0	0	1	1	0	0	1	0	0	0	1
0	0	1	0	1	0	0	0	1	0	0	1	0	0	0	1
0	0	1	0	0	0	0	0	1	1	0	1	0	0	0	1
0	0	1	0	0	0	0	1	0	0	0	1	0	0	0	1
0	0	1	0	0	0	0	1	0	1	0	1	0	0	0	1
0	0	1	0	1	0	0	0	0	1	0	1	0	0	0	1
0	0	0	0	0	1	1	0	0	1	0	0	0	0	1	0
0	0	0	0	1	1	0	0	0	0	0	0	0	0	1	0
0	0	0	0	1	1	1	0	0	0	0	0	0	0	0	0
0	0	0	0	1	1	1	0	0	1	0	0	0	0	0	0
0	0	0	0	0	1	0	0	0	0	0	0	0	0	0	0
0	0	0	0	1	0	0	1	1	0	0	0	0	0	0	0
0	0	0	0	1	0	0	0	1	0	0	0	0	0	0	0
0	0	0	0	0	0	0	0	1	1	0	0	0	0	0	0
0	0	0	0	0	0	0	1	0	0	0	0	0	0	0	0
0	0	0	0	0	0	0	1	0	1	0	0	0	0	0	0
0	0	0	0	1	0	0	0	0	1	0	0	0	0	0	0
0	0	0	0	0	1	1	0	0	1	0	0	0	0	1	1
0	0	0	0	1	1	0	0	0	0	0	0	0	0	1	0
0	0	0	0	1	0	0	1	1	0	0	0	0	0	0	0
0	0	0	0	1	0	0	0	1	0	0	0	0	0	0	0
0	0	0	0	0	0	0	0	1	1	0	0	0	0	0	0
0	0	0	0	0	0	0	1	0	0	0	0	0	0	0	0
0	0	0	0	0	0	0	1	0	1	0	0	0	0	0	0
0	0	0	0	1	0	0	0	0	1	0	0	0	0	0	0
0	0	0	1	0	1	1	0	0	1	0	0	0	0	1	0
0	0	0	1	1	1	0	0	0	0	0	0	0	0	1	1
0	0	0	1	1	1	1	0	0	0	0	0	0	0	0	1
0	0	0	1	1	1	1	0	0	1	0	0	0	0	0	0
0	0	0	1	0	1	0	0	0	0	0	0	0	0	0	0
0	0	0	1	1	0	0	1	1	0	0	0	0	0	0	0
0	0	0	1	1	0	0	0	1	0	0	0	0	0	0	1
0	0	0	1	0	0	0	0	1	1	0	0	0	0	0	0
0	0	0	1	0	0	0	1	0	0	0	0	0	0	0	1
0	0	0	1	0	0	0	1	0	1	0	0	0	0	0	0
0	0	0	1	1	0	0	0	0	1	0	0	0	0	0	1
0	0	1	0	0	1	1	0	0	1	0	0	0	0	1	1
0	0	1	0	1	1	0	0	0	0	0	0	0	0	1	1
0	0	1	0	1	0	0	1	1	0	0	0	0	0	0	1
0	0	1	0	1	0	0	0	1	0	0	0	0	0	0	1
0	0	1	0	0	0	0	0	1	1	0	0	0	0	0	1
0	0	1	0	0	0	0	1	0	0	0	0	0	0	0	1
0	0	1	0	0	0	0	1	0	1	0	0	0	0	0	1
0	0	1	0	1	0	0	0	0	1	0	0	0	0	0	1
0	1	0	0	0	1	1	0	0	1	0	1	0	0	1	1
0	1	0	0	1	1	0	0	0	0	0	1	0	0	1	1
0	1	0	0	1	0	0	1	1	0	0	1	0	0	0	1
0	1	0	0	1	0	0	0	1	0	0	1	0	0	0	0
0	1	0	0	0	0	0	0	1	1	0	1	0	0	0	0
0	1	0	0	0	0	0	1	0	0	0	1	0	0	0	0
0	1	0	0	0	0	0	1	0	1	0	1	0	0	0	0
0	1	0	0	1	0	0	0	0	1	0	1	0	0	0	0
0	0	0	0	0	1	1	0	0	1	0	1	0	0	1	0
0	0	0	0	1	1	0	0	0	0	0	1	0	0	1	0
0	0	0	0	1	0	0	1	1	0	0	1	0	0	0	0
0	0	0	0	1	0	0	0	1	0	0	1	0	0	0	0
0	0	0	0	0	0	0	0	1	1	0	1	0	0	0	0
0	0	0	0	0	0	0	1	0	0	0	1	0	0	0	0
0	0	0	0	0	0	0	1	0	1	0	1	0	0	0	0
0	0	0	0	1	0	0	0	0	1	0	1	0	0	0	0
0	1	0	0	0	1	1	0	0	1	0	1	0	0	1	1
0	1	0	0	1	1	0	0	0	0	0	1	0	0	1	1
0	1	0	0	1	1	1	0	0	0	0	1	0	0	0	1
0	1	0	0	1	1	1	0	0	1	0	1	0	0	0	1
0	1	0	0	0	1	0	0	0	0	0	1	0	0	0	1
0	1	0	0	1	0	0	1	1	0	0	1	0	0	0	1
0	1	0	0	1	0	0	0	1	0	0	1	0	0	0	1
0	1	0	0	0	0	0	0	1	1	0	1	0	0	0	0
0	1	0	0	0	0	0	1	0	0	0	1	0	0	0	1
0	1	0	0	0	0	0	1	0	1	0	1	0	0	0	1
0	1	0	0	1	0	0	0	0	1	0	1	0	0	0	1
0	0	0	0	0	1	1	0	0	1	0	0	0	0	1	1
0	0	0	0	1	1	0	0	0	0	0	0	0	0	1	1
0	0	0	0	1	0	0	1	1	0	0	0	0	0	0	0
0	0	0	0	1	0	0	0	1	0	0	0	0	0	0	0
0	0	0	0	0	0	0	0	1	1	0	0	0	0	0	0
0	0	0	0	0	0	0	1	0	0	0	0	0	0	0	0
0	0	0	0	0	0	0	1	0	1	0	0	0	0	0	0
0	0	0	0	1	0	0	0	0	1	0	0	0	0	0	0
0	0	0	1	0	1	1	0	0	1	0	1	0	0	1	0
0	0	0	1	1	1	0	0	0	0	0	1	0	0	1	0
0	0	0	1	1	1	1	0	0	0	0	1	0	0	0	1
0	0	0	1	0	1	0	0	0	0	0	1	0	0	0	0
0	0	0	1	1	0	0	1	1	0	0	1	0	0	0	0
0	0	0	1	1	0	0	0	1	0	0	1	0	0	0	0
0	0	0	1	0	0	0	0	1	1	0	1	0	0	0	0
0	0	0	1	0	0	0	1	0	1	0	1	0	0	0	0
0	0	0	1	1	0	0	0	0	1	0	1	0	0	0	0
0	0	0	0	0	1	1	0	0	1	0	0	0	0	1	0
0	0	0	0	1	1	0	0	0	0	0	0	0	0	1	0
0	0	0	0	1	1	1	0	0	0	0	0	0	0	0	0
0	0	0	0	1	1	1	0	0	1	0	0	0	0	0	0
0	0	0	0	0	1	0	0	0	0	0	0	0	0	0	0
0	0	0	0	1	0	0	1	1	0	0	0	0	0	0	0
0	0	0	0	1	0	0	0	1	0	0	0	0	0	0	0
0	0	0	0	0	0	0	0	1	1	0	0	0	0	0	0
0	0	0	0	0	0	0	1	0	0	0	0	0	0	0	0
0	0	0	0	0	0	0	1	0	1	0	0	0	0	0	0
0	0	0	0	1	0	0	0	0	1	0	0	0	0	0	0
1	0	0	0	0	1	1	0	0	1	0	0	0	0	1	1
1	0	0	0	1	1	0	0	0	0	0	0	0	0	1	1
1	0	0	0	1	1	1	0	0	0	0	0	0	0	0	0
1	0	0	0	1	1	1	0	0	1	0	0	0	0	0	0
1	0	0	0	0	1	0	0	0	0	0	0	0	0	0	1
1	0	0	0	1	0	0	1	1	0	0	0	0	0	0	0
1	0	0	0	1	0	0	0	1	0	0	0	0	0	0	0
1	0	0	0	0	0	0	0	1	1	0	0	0	0	0	0
1	0	0	0	0	0	0	1	0	0	0	0	0	0	0	1
1	0	0	0	0	0	0	1	0	1	0	0	0	0	0	1
1	0	0	0	1	0	0	0	0	1	0	0	0	0	0	1
0	0	0	0	0	1	1	0	0	1	0	1	0	0	1	0
0	0	0	0	1	1	0	0	0	0	0	1	0	0	1	0
0	0	0	0	1	0	0	1	1	0	0	1	0	0	0	0
0	0	0	0	1	0	0	0	1	0	0	1	0	0	0	0
0	0	0	0	0	0	0	0	1	1	0	1	0	0	0	0
0	0	0	0	0	0	0	1	0	0	0	1	0	0	0	1
0	0	0	0	0	0	0	1	0	1	0	1	0	0	0	1
0	0	0	0	1	0	0	0	0	1	0	1	0	0	0	0
0	0	0	0	0	1	1	0	0	1	0	1	0	0	1	0
0	0	0	0	1	1	0	0	0	0	0	1	0	0	1	0
0	0	0	0	1	1	1	0	0	0	0	1	0	0	0	0
0	0	0	0	1	1	1	0	0	1	0	1	0	0	0	0
0	0	0	0	0	1	0	0	0	0	0	1	0	0	0	0
0	0	0	0	1	0	0	1	1	0	0	1	0	0	0	0
0	0	0	0	1	0	0	0	1	0	0	1	0	0	0	0
0	0	0	0	0	0	0	0	1	1	0	1	0	0	0	0
0	0	0	0	0	0	0	1	0	0	0	1	0	0	0	0
0	0	0	0	0	0	0	1	0	1	0	1	0	0	0	0
0	0	0	0	1	0	0	0	0	1	0	1	0	0	0	0
0	0	1	0	0	1	1	0	0	1	0	0	0	0	1	1
0	0	1	0	1	1	0	0	0	0	0	0	0	0	1	1
0	0	1	0	1	1	1	0	0	0	0	0	0	0	0	1
0	0	1	0	1	1	1	0	0	1	0	0	0	0	0	1
0	0	1	0	0	1	0	0	0	0	0	0	0	0	0	1
0	0	1	0	1	0	0	1	1	0	0	0	0	0	0	1
0	0	1	0	1	0	0	0	1	0	0	0	0	0	0	1
0	0	1	0	0	0	0	0	1	1	0	0	0	0	0	0
0	0	1	0	0	0	0	1	0	0	0	0	0	0	0	1
0	0	1	0	0	0	0	1	0	1	0	0	0	0	0	1
0	0	1	0	1	0	0	0	0	1	0	0	0	0	0	1
0	0	0	0	0	1	1	0	0	1	0	0	0	0	1	0
0	0	0	0	1	1	0	0	0	0	0	0	0	0	1	0
0	0	0	0	1	0	0	1	1	0	0	0	0	0	0	0
0	0	0	0	1	0	0	0	1	0	0	0	0	0	0	0
0	0	0	0	0	0	0	0	1	1	0	0	0	0	0	0
0	0	0	0	0	0	0	1	0	0	0	0	0	0	0	0
0	0	0	0	0	0	0	1	0	1	0	0	0	0	0	0
0	0	0	0	1	0	0	0	0	1	0	0	0	0	0	0
0	0	0	1	0	1	1	0	0	1	0	1	0	0	1	1
0	0	0	1	1	1	0	0	0	0	0	1	0	0	1	1
0	0	0	1	1	1	1	0	0	1	0	1	0	0	0	1
0	0	0	1	1	0	0	1	1	0	0	1	0	0	0	1
0	0	0	1	1	0	0	0	1	0	0	1	0	0	0	0
0	0	0	1	0	0	0	0	1	1	0	1	0	0	0	1
0	0	0	1	0	0	0	1	0	0	0	1	0	0	0	1
0	0	0	1	0	0	0	1	0	1	0	1	0	0	0	1
0	0	0	1	1	0	0	0	0	1	0	1	0	0	0	0
0	0	1	0	0	1	1	0	0	1	0	0	0	0	1	1
0	0	1	0	1	1	0	0	0	0	0	0	0	0	1	1
0	0	1	0	1	1	1	0	0	0	0	0	0	0	0	1
0	0	1	0	1	1	1	0	0	1	0	0	0	0	0	1
0	0	1	0	0	1	0	0	0	0	0	0	0	0	0	1
0	0	1	0	1	0	0	1	1	0	0	0	0	0	0	1
0	0	1	0	1	0	0	0	1	0	0	0	0	0	0	0
0	0	1	0	0	0	0	0	1	1	0	0	0	0	0	0
0	0	1	0	0	0	0	1	0	0	0	0	0	0	0	1
0	0	1	0	0	0	0	1	0	1	0	0	0	0	0	1
0	0	1	0	1	0	0	0	0	1	0	0	0	0	0	0
0	0	0	1	0	1	1	0	0	1	0	0	0	0	1	1
0	0	0	1	1	1	0	0	0	0	0	0	0	0	1	1
0	0	0	1	0	1	0	0	0	1	0	0	0	0	0	1
0	0	0	1	1	1	0	0	0	1	0	0	0	0	0	1
0	0	0	1	1	0	0	1	1	0	0	0	0	0	0	0
0	0	0	1	1	0	0	0	1	0	0	0	0	0	0	0
0	0	0	1	0	0	0	0	1	1	0	0	0	0	0	0
0	0	0	1	0	0	0	1	0	0	0	0	0	0	0	0
0	0	0	1	0	0	0	1	0	1	0	0	0	0	0	0
0	0	0	1	1	0	0	0	0	1	0	0	0	0	0	0
1	0	0	0	0	1	1	0	0	1	0	0	0	0	1	1
1	0	0	0	1	1	0	0	0	0	0	0	0	0	1	1
1	0	0	0	0	1	0	0	0	1	0	0	0	0	0	0
1	0	0	0	1	1	0	0	0	1	0	0	0	0	0	1
1	0	0	0	1	0	0	1	1	0	0	0	0	0	0	0
1	0	0	0	1	0	0	0	1	0	0	0	0	0	0	0
1	0	0	0	0	0	0	0	1	1	0	0	0	0	0	0
1	0	0	0	0	0	0	1	0	0	0	0	0	0	0	1
1	0	0	0	0	0	0	1	0	1	0	0	0	0	0	1
1	0	0	0	1	0	0	0	0	1	0	0	0	0	0	1
1	0	0	0	0	1	1	0	0	1	0	0	0	0	1	1
1	0	0	0	1	1	0	0	0	0	0	0	0	0	1	1
1	0	0	0	1	1	1	0	0	0	0	0	0	0	0	1
1	0	0	0	1	1	1	0	0	1	0	0	0	0	0	1
1	0	0	0	0	1	0	0	0	0	0	0	0	0	0	1
1	0	0	0	1	0	0	1	1	0	0	0	0	0	0	0
1	0	0	0	1	0	0	0	1	0	0	0	0	0	0	1
1	0	0	0	0	0	0	0	1	1	0	0	0	0	0	0
1	0	0	0	0	0	0	1	0	0	0	0	0	0	0	1
1	0	0	0	0	0	0	1	0	1	0	0	0	0	0	1
1	0	0	0	1	0	0	0	0	1	0	0	0	0	0	1
0	0	0	0	0	1	1	0	0	1	0	0	0	0	1	0
0	0	0	0	1	1	0	0	0	0	0	0	0	0	1	0
0	0	0	0	1	1	1	0	0	0	0	0	0	0	0	0
0	0	0	0	1	1	1	0	0	1	0	0	0	0	0	0
0	0	0	0	0	1	0	0	0	0	0	0	0	0	0	0
0	0	0	0	1	0	0	1	1	0	0	0	0	0	0	0
0	0	0	0	1	0	0	0	1	0	0	0	0	0	0	0
0	0	0	0	0	0	0	0	1	1	0	0	0	0	0	0
0	0	0	0	0	0	0	1	0	0	0	0	0	0	0	0
0	0	0	0	0	0	0	1	0	1	0	0	0	0	0	0
0	0	0	0	1	0	0	0	0	1	0	0	0	0	0	0
0	1	0	0	0	1	1	0	0	1	0	1	0	0	1	1
0	1	0	0	1	1	0	0	0	0	0	1	0	0	1	1
0	1	0	0	1	0	0	1	1	0	0	1	0	0	0	1
0	1	0	0	1	0	0	0	1	0	0	1	0	0	0	1
0	1	0	0	0	0	0	0	1	1	0	1	0	0	0	0
0	1	0	0	0	0	0	1	0	0	0	1	0	0	0	1
0	1	0	0	0	0	0	1	0	1	0	1	0	0	0	0
0	1	0	0	1	0	0	0	0	1	0	1	0	0	0	1
1	0	0	0	0	1	1	0	0	1	0	0	0	0	1	0
1	0	0	0	1	1	0	0	0	0	0	0	0	0	1	1
1	0	0	0	1	0	0	1	1	0	0	0	0	0	0	1
1	0	0	0	1	0	0	0	1	0	0	0	0	0	0	1
1	0	0	0	0	0	0	0	1	1	0	0	0	0	0	0
1	0	0	0	0	0	0	1	0	0	0	0	0	0	0	0
1	0	0	0	0	0	0	1	0	1	0	0	0	0	0	0
1	0	0	0	1	0	0	0	0	1	0	0	0	0	0	1
1	0	0	0	0	1	1	0	0	1	0	0	0	0	1	0
1	0	0	0	1	1	0	0	0	0	0	0	0	0	1	1
1	0	0	0	1	1	1	0	0	0	0	0	0	0	0	1
1	0	0	0	1	1	1	0	0	1	0	0	0	0	0	1
1	0	0	0	0	1	0	0	0	0	0	0	0	0	0	0
1	0	0	0	1	0	0	1	1	0	0	0	0	0	0	1
1	0	0	0	1	0	0	0	1	0	0	0	0	0	0	1
1	0	0	0	0	0	0	0	1	1	0	0	0	0	0	0
1	0	0	0	0	0	0	1	0	0	0	0	0	0	0	1
1	0	0	0	0	0	0	1	0	1	0	0	0	0	0	1
1	0	0	0	1	0	0	0	0	1	0	0	0	0	0	0
0	0	0	0	0	1	1	0	0	1	0	0	0	0	1	1
0	0	0	0	1	1	0	0	0	0	0	0	0	0	1	0
0	0	0	0	0	1	0	0	0	1	0	0	0	0	0	0
0	0	0	0	1	1	0	0	0	1	0	0	0	0	0	0
0	0	0	0	1	0	0	1	1	0	0	0	0	0	0	0
0	0	0	0	1	0	0	0	1	0	0	0	0	0	0	0
0	0	0	0	0	0	0	0	1	1	0	0	0	0	0	0
0	0	0	0	0	0	0	1	0	0	0	0	0	0	0	0
0	0	0	0	0	0	0	1	0	1	0	0	0	0	0	0
0	0	0	0	1	0	0	0	0	1	0	0	0	0	0	0
0	0	0	0	0	1	1	0	0	1	0	1	0	0	1	1
0	0	0	0	1	1	0	0	0	0	0	1	0	0	1	1
0	0	0	0	1	1	1	0	0	0	0	1	0	0	0	1
0	0	0	0	1	1	1	0	0	1	0	1	0	0	0	0
0	0	0	0	0	1	0	0	0	0	0	1	0	0	0	1
0	0	0	0	1	0	0	1	1	0	0	1	0	0	0	0
0	0	0	0	1	0	0	0	1	0	0	1	0	0	0	0
0	0	0	0	0	0	0	0	1	1	0	1	0	0	0	0
0	0	0	0	0	0	0	1	0	0	0	1	0	0	0	1
0	0	0	0	0	0	0	1	0	1	0	1	0	0	0	1
0	0	0	0	1	0	0	0	0	1	0	1	0	0	0	0
0	0	0	0	0	1	1	0	0	1	0	1	0	0	1	0
0	0	0	0	1	1	0	0	0	0	0	1	0	0	1	0
0	0	0	0	1	0	0	1	1	0	0	1	0	0	0	0
0	0	0	0	1	0	0	0	1	0	0	1	0	0	0	0
0	0	0	0	0	0	0	0	1	1	0	1	0	0	0	0
0	0	0	0	0	0	0	1	0	0	0	1	0	0	0	0
0	0	0	0	0	0	0	1	0	1	0	1	0	0	0	0
0	0	0	0	1	0	0	0	0	1	0	1	0	0	0	0
0	0	0	1	0	1	1	0	0	1	0	0	0	0	1	1
0	0	0	1	1	1	0	0	0	0	0	0	0	0	1	1
0	0	0	1	1	1	1	0	0	0	0	0	0	0	0	1
0	0	0	1	1	1	1	0	0	1	0	0	0	0	0	0
0	0	0	1	0	1	0	0	0	0	0	0	0	0	0	1
0	0	0	1	1	0	0	1	1	0	0	0	0	0	0	0
0	0	0	1	1	0	0	0	1	0	0	0	0	0	0	0
0	0	0	1	0	0	0	0	1	1	0	0	0	0	0	0
0	0	0	1	0	0	0	1	0	0	0	0	0	0	0	0
0	0	0	1	0	0	0	1	0	1	0	0	0	0	0	0
0	0	0	1	1	0	0	0	0	1	0	0	0	0	0	0
0	0	0	0	0	1	1	0	0	1	0	0	0	0	1	0
0	0	0	0	1	1	0	0	0	0	0	0	0	0	1	1
0	0	0	0	1	0	0	1	1	0	0	0	0	0	0	1
0	0	0	0	1	0	0	0	1	0	0	0	0	0	0	1
0	0	0	0	0	0	0	0	1	1	0	0	0	0	0	0
0	0	0	0	0	0	0	1	0	0	0	0	0	0	0	0
0	0	0	0	0	0	0	1	0	1	0	0	0	0	0	0
0	0	0	0	1	0	0	0	0	1	0	0	0	0	0	1
1	0	0	0	0	1	1	0	0	1	0	1	0	0	1	1
1	0	0	0	1	1	0	0	0	0	0	1	0	0	1	1
1	0	0	0	1	0	0	1	1	0	0	1	0	0	0	1
1	0	0	0	1	0	0	0	1	0	0	1	0	0	0	1
1	0	0	0	0	0	0	0	1	1	0	1	0	0	0	0
1	0	0	0	0	0	0	1	0	0	0	1	0	0	0	1
1	0	0	0	0	0	0	1	0	1	0	1	0	0	0	1
1	0	0	0	1	0	0	0	0	1	0	1	0	0	0	1
1	0	0	0	0	1	1	0	0	1	0	0	0	0	1	0
1	0	0	0	1	1	0	0	0	0	0	0	0	0	1	1
1	0	0	0	1	0	0	1	1	0	0	0	0	0	0	1
1	0	0	0	1	0	0	0	1	0	0	0	0	0	0	1
1	0	0	0	0	0	0	0	1	1	0	0	0	0	0	0
1	0	0	0	0	0	0	1	0	0	0	0	0	0	0	0
1	0	0	0	0	0	0	1	0	1	0	0	0	0	0	0
1	0	0	0	1	0	0	0	0	1	0	0	0	0	0	1
1	0	0	0	0	1	1	0	0	1	0	0	0	0	1	1
1	0	0	0	1	1	0	0	0	0	0	0	0	0	1	1
1	0	0	0	1	0	0	1	1	0	0	0	0	0	0	1
1	0	0	0	1	0	0	0	1	0	0	0	0	0	0	1
1	0	0	0	0	0	0	0	1	1	0	0	0	0	0	1
1	0	0	0	0	0	0	1	0	0	0	0	0	0	0	1
1	0	0	0	0	0	0	1	0	1	0	0	0	0	0	1
1	0	0	0	1	0	0	0	0	1	0	0	0	0	0	1
1	0	0	0	0	1	1	0	0	1	0	0	0	0	1	1
1	0	0	0	1	1	0	0	0	0	0	0	0	0	1	1
1	0	0	0	0	1	0	0	0	1	0	0	0	0	0	0
1	0	0	0	1	1	0	0	0	1	0	0	0	0	0	1
1	0	0	0	1	0	0	1	1	0	0	0	0	0	0	1
1	0	0	0	1	0	0	0	1	0	0	0	0	0	0	1
1	0	0	0	0	0	0	0	1	1	0	0	0	0	0	1
1	0	0	0	0	0	0	1	0	0	0	0	0	0	0	1
1	0	0	0	0	0	0	1	0	1	0	0	0	0	0	1
1	0	0	0	1	0	0	0	0	1	0	0	0	0	0	1
0	0	0	0	0	1	1	0	0	1	0	0	0	0	1	0
0	0	0	0	1	1	0	0	0	0	0	0	0	0	1	0
0	0	0	0	0	1	0	0	0	1	0	0	0	0	0	0
0	0	0	0	1	1	0	0	0	1	0	0	0	0	0	0
0	0	0	0	1	0	0	1	1	0	0	0	0	0	0	0
0	0	0	0	1	0	0	0	1	0	0	0	0	0	0	0
0	0	0	0	0	0	0	0	1	1	0	0	0	0	0	0
0	0	0	0	0	0	0	1	0	0	0	0	0	0	0	0
0	0	0	0	0	0	0	1	0	1	0	0	0	0	0	0
0	0	0	0	1	0	0	0	0	1	0	0	0	0	0	0
0	0	0	0	0	1	1	0	0	1	0	0	0	0	1	0
0	0	0	0	1	1	0	0	0	0	0	0	0	0	1	0
0	0	0	0	1	0	0	1	1	0	0	0	0	0	0	0
0	0	0	0	1	0	0	0	1	0	0	0	0	0	0	0
0	0	0	0	0	0	0	0	1	1	0	0	0	0	0	0
0	0	0	0	0	0	0	1	0	0	0	0	0	0	0	0
0	0	0	0	0	0	0	1	0	1	0	0	0	0	0	0
0	0	0	0	1	0	0	0	0	1	0	0	0	0	0	0
0	1	0	0	0	1	1	0	0	1	0	1	0	0	1	0
0	1	0	0	1	1	0	0	0	0	0	1	0	0	1	1
0	1	0	0	1	0	0	1	1	0	0	1	0	0	0	1
0	1	0	0	1	0	0	0	1	0	0	1	0	0	0	1
0	1	0	0	0	0	0	0	1	1	0	1	0	0	0	1
0	1	0	0	0	0	0	1	0	0	0	1	0	0	0	0
0	1	0	0	0	0	0	1	0	1	0	1	0	0	0	1
0	1	0	0	1	0	0	0	0	1	0	1	0	0	0	1
0	0	0	0	0	1	1	0	0	1	0	0	0	0	1	0
0	0	0	0	1	1	0	0	0	0	0	0	0	0	1	1
0	0	0	0	1	0	0	1	1	0	0	0	0	0	0	0
0	0	0	0	1	0	0	0	1	0	0	0	0	0	0	0
0	0	0	0	0	0	0	0	1	1	0	0	0	0	0	0
0	0	0	0	0	0	0	1	0	0	0	0	0	0	0	0
0	0	0	0	0	0	0	1	0	1	0	0	0	0	0	1
0	0	0	0	1	0	0	0	0	1	0	0	0	0	0	1
0	0	0	0	0	1	1	0	0	1	0	0	0	0	1	1
0	0	0	0	1	1	0	0	0	0	0	0	0	0	1	0
0	0	0	0	1	1	1	0	0	0	0	0	0	0	0	0
0	0	0	0	1	1	1	0	0	1	0	0	0	0	0	0
0	0	0	0	0	1	0	0	0	0	0	0	0	0	0	0
0	0	0	0	1	0	0	1	1	0	0	0	0	0	0	0
0	0	0	0	1	0	0	0	1	0	0	0	0	0	0	0
0	0	0	0	0	0	0	0	1	1	0	0	0	0	0	0
0	0	0	0	0	0	0	1	0	0	0	0	0	0	0	0
0	0	0	0	0	0	0	1	0	1	0	0	0	0	0	0
0	0	0	0	1	0	0	0	0	1	0	0	0	0	0	0
1	0	0	0	0	1	1	0	0	1	0	1	0	0	1	1
1	0	0	0	1	1	0	0	0	0	0	1	0	0	1	1
1	0	0	0	1	1	1	0	0	0	0	1	0	0	0	1
1	0	0	0	1	1	1	0	0	1	0	1	0	0	0	1
1	0	0	0	0	1	0	0	0	0	0	1	0	0	0	1
1	0	0	0	0	1	0	0	0	1	0	1	0	0	0	1
1	0	0	0	1	1	0	0	0	1	0	1	0	0	0	1
1	0	0	0	1	0	0	1	1	0	0	1	0	0	0	1
1	0	0	0	1	0	0	0	1	0	0	1	0	0	0	1
1	0	0	0	0	0	0	0	1	1	0	1	0	0	0	1
1	0	0	0	0	0	0	1	0	0	0	1	0	0	0	1
1	0	0	0	0	0	0	1	0	1	0	1	0	0	0	1
1	0	0	0	1	0	0	0	0	1	0	1	0	0	0	1
0	0	1	0	0	1	1	0	0	1	0	0	0	0	1	1
0	0	1	0	1	1	0	0	0	0	0	0	0	0	1	1
0	0	1	0	1	1	1	0	0	0	0	0	0	0	0	1
0	0	1	0	1	1	1	0	0	1	0	0	0	0	0	1
0	0	1	0	0	1	0	0	0	0	0	0	0	0	0	1
0	0	1	0	1	0	0	1	1	0	0	0	0	0	0	1
0	0	1	0	1	0	0	0	1	0	0	0	0	0	0	1
0	0	1	0	0	0	0	0	1	1	0	0	0	0	0	1
0	0	1	0	0	0	0	1	0	0	0	0	0	0	0	1
0	0	1	0	0	0	0	1	0	1	0	0	0	0	0	1
0	0	1	0	1	0	0	0	0	1	0	0	0	0	0	1
1	0	0	0	0	1	1	0	0	1	0	0	0	0	1	1
1	0	0	0	1	1	0	0	0	0	0	0	0	0	1	1
1	0	0	0	1	0	0	1	1	0	0	0	0	0	0	0
1	0	0	0	1	0	0	0	1	0	0	0	0	0	0	1
1	0	0	0	0	0	0	0	1	1	0	0	0	0	0	0
1	0	0	0	0	0	0	1	0	0	0	0	0	0	0	0
1	0	0	0	0	0	0	1	0	1	0	0	0	0	0	0
1	0	0	0	1	0	0	0	0	1	0	0	0	0	0	1
0	0	0	0	0	1	1	0	0	1	0	0	0	0	1	1
0	0	0	0	1	1	0	0	0	0	0	0	0	0	1	1
0	0	0	0	1	0	0	1	1	0	0	0	0	0	0	0
0	0	0	0	1	0	0	0	1	0	0	0	0	0	0	0
0	0	0	0	0	0	0	0	1	1	0	0	0	0	0	0
0	0	0	0	0	0	0	1	0	0	0	0	0	0	0	0
0	0	0	0	0	0	0	1	0	1	0	0	0	0	0	0
0	0	0	0	1	0	0	0	0	1	0	0	0	0	0	0
0	0	0	0	0	1	1	0	0	1	0	1	0	0	1	0
0	0	0	0	1	1	0	0	0	0	0	1	0	0	1	0
0	0	0	0	1	0	0	1	1	0	0	1	0	0	0	0
0	0	0	0	1	0	0	0	1	0	0	1	0	0	0	0
0	0	0	0	0	0	0	0	1	1	0	1	0	0	0	0
0	0	0	0	0	0	0	1	0	0	0	1	0	0	0	0
0	0	0	0	0	0	0	1	0	1	0	1	0	0	0	0
0	0	0	0	1	0	0	0	0	1	0	1	0	0	0	0
1	0	0	0	0	1	1	0	0	1	0	1	0	0	1	1
1	0	0	0	1	1	0	0	0	0	0	1	0	0	1	1
1	0	0	0	1	1	1	0	0	0	0	1	0	0	0	1
1	0	0	0	1	1	1	0	0	1	0	1	0	0	0	1
1	0	0	0	0	1	0	0	0	0	0	1	0	0	0	1
1	0	0	0	1	0	0	1	1	0	0	1	0	0	0	0
1	0	0	0	1	0	0	0	1	0	0	1	0	0	0	0
1	0	0	0	0	0	0	0	1	1	0	1	0	0	0	0
1	0	0	0	0	0	0	1	0	0	0	1	0	0	0	1
1	0	0	0	0	0	0	1	0	1	0	1	0	0	0	1
1	0	0	0	1	0	0	0	0	1	0	1	0	0	0	1
0	0	0	0	0	1	1	0	0	1	0	0	0	0	1	0
0	0	0	0	1	1	0	0	0	0	0	0	0	0	1	0
0	0	0	0	1	0	0	1	1	0	0	0	0	0	0	0
0	0	0	0	1	0	0	0	1	0	0	0	0	0	0	0
0	0	0	0	0	0	0	0	1	1	0	0	0	0	0	0
0	0	0	0	0	0	0	1	0	0	0	0	0	0	0	0
0	0	0	0	0	0	0	1	0	1	0	0	0	0	0	0
0	0	0	0	1	0	0	0	0	1	0	0	0	0	0	0
0	0	0	0	0	1	1	0	0	1	0	0	0	0	1	0
0	0	0	0	1	1	0	0	0	0	0	0	0	0	1	0
0	0	0	0	0	1	0	0	0	1	0	0	0	0	0	0
0	0	0	0	1	1	0	0	0	1	0	0	0	0	0	0
0	0	0	0	1	0	0	1	1	0	0	0	0	0	0	0
0	0	0	0	1	0	0	0	1	0	0	0	0	0	0	0
0	0	0	0	0	0	0	0	1	1	0	0	0	0	0	0
0	0	0	0	0	0	0	1	0	0	0	0	0	0	0	0
0	0	0	0	0	0	0	1	0	1	0	0	0	0	0	0
0	0	0	0	1	0	0	0	0	1	0	0	0	0	0	0
1	0	0	0	0	1	1	0	0	1	0	0	0	0	1	1
1	0	0	0	1	1	0	0	0	0	0	0	0	0	1	1
1	0	0	0	0	1	0	0	0	1	0	0	0	0	0	1
1	0	0	0	1	1	0	0	0	1	0	0	0	0	0	0
1	0	0	0	1	0	0	1	1	0	0	0	0	0	0	0
1	0	0	0	1	0	0	0	1	0	0	0	0	0	0	0
1	0	0	0	0	0	0	0	1	1	0	0	0	0	0	0
1	0	0	0	0	0	0	1	0	0	0	0	0	0	0	1
1	0	0	0	0	0	0	1	0	1	0	0	0	0	0	1
1	0	0	0	1	0	0	0	0	1	0	0	0	0	0	0
0	0	0	1	0	1	1	0	0	1	0	0	0	0	1	0
0	0	0	1	1	1	0	0	0	0	0	0	0	0	1	0
0	0	0	1	1	1	1	0	0	0	0	0	0	0	0	0
0	0	0	1	1	1	1	0	0	1	0	0	0	0	0	0
0	0	0	1	0	1	0	0	0	0	0	0	0	0	0	0
0	0	0	1	1	0	0	1	1	0	0	0	0	0	0	0
0	0	0	1	1	0	0	0	1	0	0	0	0	0	0	0
0	0	0	1	0	0	0	0	1	1	0	0	0	0	0	0
[truncated: 1,817 more rows]
