# Supplementary material
Source: ML conference proceedings conference paper supplement (https://proceedings.neurips.cc/paper_files/paper/2022/hash/5afaa8b4dd18eb1eed055d2d821b58ae-Abstract.html)
Supplement: Supplementary file 1 [file 5afaa8b4dd18eb1eed055d2d821b58ae-Supplemental-Conference.zip › 6769_exploring_the_whole_rashomon_s-Supplementary Material/6769_code_repo/experiments/datasets/coupon/Restaurant(20).csv]

toCoupon_GEQ25min	expiration_1d	time_6PM	destination_No Urgent Place	time_10PM	CarryAway_less1	passanger_Kid(s)	weather_Snowy	passanger_Alone	income_$87500 - $99999	occupation_Retired	CoffeeHouse_gt8	age_36	weather_Rainy	direction_same	target
0	1	0	1	0	0	0	0	1	0	0	0	0	0	0	1
0	1	0	1	0	0	0	0	0	0	0	0	0	0	0	1
0	0	1	1	0	0	0	0	0	0	0	0	0	0	0	1
0	1	0	0	0	0	0	0	1	0	0	0	0	0	0	1
0	1	0	1	0	0	0	0	1	0	0	0	0	0	0	1
0	1	0	1	0	0	0	0	0	0	0	0	0	0	0	1
0	0	1	1	0	0	0	0	0	0	0	0	0	0	0	1
0	1	0	0	0	0	0	0	1	0	0	0	0	0	0	0
0	1	0	1	0	0	0	0	1	0	0	0	0	0	0	1
0	0	1	1	0	0	0	0	0	0	0	0	0	0	0	1
0	0	0	1	0	0	1	0	0	0	0	0	0	0	0	1
0	1	0	1	0	0	1	0	0	0	0	0	0	0	0	1
0	1	0	1	0	0	1	0	0	0	0	0	0	0	0	1
0	1	0	0	0	0	0	0	1	0	0	0	0	0	0	1
0	1	0	1	0	0	0	0	1	0	0	0	0	0	0	0
0	1	0	1	0	0	0	0	0	0	0	0	0	0	0	1
0	0	1	1	0	0	0	0	0	0	0	0	0	0	0	1
0	1	0	0	0	0	0	0	1	0	0	0	0	0	0	1
0	1	0	1	0	0	0	0	1	0	0	1	0	0	0	1
0	1	0	1	0	0	0	0	0	0	0	1	0	0	0	1
0	0	1	1	0	0	0	0	0	0	0	1	0	0	0	0
0	1	0	0	0	0	0	0	1	0	0	1	0	0	0	1
0	1	0	1	0	0	0	0	1	0	0	0	0	0	0	1
0	0	1	1	0	0	0	0	0	0	0	0	0	0	0	1
0	0	0	1	0	0	1	0	0	0	0	0	0	0	0	1
0	1	0	1	0	0	1	0	0	0	0	0	0	0	0	1
0	1	0	1	0	0	1	0	0	0	0	0	0	0	0	1
0	1	0	0	0	0	0	0	1	0	0	0	0	0	0	1
0	1	0	1	0	0	0	0	1	0	0	1	0	0	0	1
0	1	0	1	0	0	0	0	0	0	0	1	0	0	0	1
0	0	1	1	0	0	0	0	0	0	0	1	0	0	0	0
0	1	0	0	0	0	0	0	1	0	0	1	0	0	0	1
0	1	0	1	0	0	0	0	1	0	0	0	0	0	0	1
0	1	0	1	0	0	0	0	0	0	0	0	0	0	0	1
0	0	1	1	0	0	0	0	0	0	0	0	0	0	0	1
0	1	0	0	0	0	0	0	1	0	0	0	0	0	0	1
0	1	0	1	0	0	0	0	1	0	0	0	0	0	0	1
0	1	0	1	0	0	0	0	0	0	0	0	0	0	0	1
0	0	1	1	0	0	0	0	0	0	0	0	0	0	0	1
0	1	0	0	0	0	0	0	1	0	0	0	0	0	0	1
0	1	0	1	0	0	0	0	1	1	0	0	0	0	0	1
0	0	1	1	0	0	0	0	0	1	0	0	0	0	0	1
0	0	1	1	0	0	0	0	0	1	0	0	0	0	0	1
0	1	0	0	0	0	0	0	1	1	0	0	0	0	0	0
0	1	0	1	0	0	0	0	1	0	0	0	0	0	0	1
0	1	0	1	0	0	0	0	0	0	0	0	0	0	0	1
0	0	1	1	0	0	0	0	0	0	0	0	0	0	0	1
0	1	0	0	0	0	0	0	1	0	0	0	0	0	0	0
0	1	0	1	0	0	0	0	1	0	0	0	0	0	0	1
0	0	1	1	0	0	0	0	0	0	0	0	0	0	0	1
0	0	0	1	0	0	1	0	0	0	0	0	0	0	0	1
0	1	0	1	0	0	1	0	0	0	0	0	0	0	0	1
0	1	0	1	0	0	1	0	0	0	0	0	0	0	0	1
0	1	0	0	0	0	0	0	1	0	0	0	0	0	0	1
0	1	0	1	0	1	0	0	1	0	0	1	0	0	0	1
0	0	1	1	0	1	0	0	0	0	0	1	0	0	0	0
0	0	0	1	0	1	1	0	0	0	0	1	0	0	0	0
0	1	0	1	0	1	1	0	0	0	0	1	0	0	0	0
0	1	0	0	0	1	0	0	1	0	0	1	0	0	0	0
0	1	0	1	0	0	0	0	1	0	0	0	0	0	0	1
0	0	1	1	0	0	0	0	0	0	0	0	0	0	0	1
0	0	0	1	0	0	1	0	0	0	0	0	0	0	0	0
0	1	0	1	0	0	1	0	0	0	0	0	0	0	0	1
0	1	0	1	0	0	1	0	0	0	0	0	0	0	0	1
0	1	0	0	0	0	0	0	1	0	0	0	0	0	0	1
0	1	0	1	0	0	0	0	1	0	0	0	0	0	0	1
0	0	1	1	0	0	0	0	0	0	0	0	0	0	0	1
0	1	0	0	0	0	0	0	1	0	0	0	0	0	0	1
0	1	0	1	0	0	0	0	1	0	0	0	0	0	0	1
0	0	1	1	0	0	0	0	0	0	0	0	0	0	0	1
0	0	0	1	0	0	1	0	0	0	0	0	0	0	0	0
0	1	0	1	0	0	1	0	0	0	0	0	0	0	0	0
0	1	0	1	0	0	1	0	0	0	0	0	0	0	0	0
0	1	0	0	0	0	0	0	1	0	0	0	0	0	0	0
0	1	0	1	0	0	0	0	1	0	0	0	0	0	0	1
0	0	1	1	0	0	0	0	0	0	0	0	0	0	0	1
0	0	0	1	0	0	1	0	0	0	0	0	0	0	0	0
0	1	0	1	0	0	1	0	0	0	0	0	0	0	0	1
0	1	0	1	0	0	1	0	0	0	0	0	0	0	0	1
0	1	0	0	0	0	0	0	1	0	0	0	0	0	0	1
0	1	0	1	0	0	0	0	1	0	0	0	0	0	0	1
0	1	0	1	0	0	0	0	0	0	0	0	0	0	0	1
0	0	1	1	0	0	0	0	0	0	0	0	0	0	0	1
0	1	0	0	0	0	0	0	1	0	0	0	0	0	0	1
0	1	0	1	0	1	0	0	1	0	0	0	0	0	0	1
0	0	1	1	0	1	0	0	0	0	0	0	0	0	0	1
0	0	1	1	0	1	0	0	0	0	0	0	0	0	0	1
0	1	0	1	0	0	0	0	1	0	0	0	0	0	0	1
0	1	0	1	0	0	0	0	0	0	0	0	0	0	0	1
0	0	1	1	0	0	0	0	0	0	0	0	0	0	0	0
0	1	0	0	0	0	0	0	1	0	0	0	0	0	0	1
0	1	0	1	0	0	0	0	1	0	0	1	0	0	0	1
0	1	0	1	0	0	0	0	0	0	0	1	0	0	0	1
0	0	1	1	0	0	0	0	0	0	0	1	0	0	0	1
0	1	0	0	0	0	0	0	1	0	0	1	0	0	0	1
0	1	0	1	0	0	0	0	1	1	0	0	0	0	0	1
0	1	0	1	0	0	0	0	0	1	0	0	0	0	0	1
0	0	1	1	0	0	0	0	0	1	0	0	0	0	0	1
0	1	0	0	0	0	0	0	1	1	0	0	0	0	0	1
0	1	0	1	0	0	0	0	1	0	0	0	0	0	0	1
0	0	1	1	0	0	0	0	0	0	0	0	0	0	0	1
0	0	0	1	0	0	1	0	0	0	0	0	0	0	0	0
0	1	0	1	0	0	1	0	0	0	0	0	0	0	0	1
0	1	0	1	0	0	1	0	0	0	0	0	0	0	0	1
0	1	0	0	0	0	0	0	1	0	0	0	0	0	0	1
0	1	0	1	0	1	0	0	1	0	0	0	0	0	0	1
0	1	0	1	0	1	0	0	0	0	0	0	0	0	0	1
0	0	1	1	0	1	0	0	0	0	0	0	0	0	0	1
0	1	0	0	0	1	0	0	1	0	0	0	0	0	0	1
0	1	0	1	0	0	0	0	1	0	0	1	0	0	0	1
0	1	0	1	0	0	0	0	0	0	0	1	0	0	0	1
0	0	1	1	0	0	0	0	0	0	0	1	0	0	0	0
0	1	0	0	0	0	0	0	1	0	0	1	0	0	0	1
0	1	0	1	0	0	0	0	1	0	0	0	0	0	0	1
0	1	0	1	0	0	0	0	0	0	0	0	0	0	0	1
0	0	1	1	0	0	0	0	0	0	0	0	0	0	0	1
0	1	0	0	0	0	0	0	1	0	0	0	0	0	0	1
0	1	0	1	0	0	0	0	1	0	0	1	0	0	0	1
0	0	1	1	0	0	0	0	0	0	0	1	0	0	0	1
0	0	0	1	0	0	1	0	0	0	0	1	0	0	0	1
0	1	0	1	0	0	1	0	0	0	0	1	0	0	0	1
0	1	0	1	0	0	1	0	0	0	0	1	0	0	0	1
0	1	0	0	0	0	0	0	1	0	0	1	0	0	0	1
0	1	0	1	0	0	0	0	1	0	0	0	0	0	0	1
0	1	0	1	0	0	0	0	0	0	0	0	0	0	0	1
0	0	1	1	0	0	0	0	0	0	0	0	0	0	0	1
0	1	0	0	0	0	0	0	1	0	0	0	0	0	0	1
0	1	0	1	0	0	0	0	1	0	0	0	0	0	0	1
0	0	1	1	0	0	0	0	0	0	0	0	0	0	0	1
0	0	1	1	0	0	0	0	0	0	0	0	0	0	0	1
0	1	0	0	0	0	0	0	1	0	0	0	0	0	0	1
0	1	0	1	0	0	0	0	1	0	0	0	1	0	0	1
0	0	1	1	0	0	0	0	0	0	0	0	1	0	0	1
0	0	0	1	0	0	1	0	0	0	0	0	1	0	0	1
0	1	0	1	0	0	1	0	0	0	0	0	1	0	0	1
0	1	0	1	0	0	1	0	0	0	0	0	1	0	0	1
0	1	0	0	0	0	0	0	1	0	0	0	1	0	0	1
0	1	0	1	0	0	0	0	1	0	0	0	1	0	0	1
0	0	1	1	0	0	0	0	0	0	0	0	1	0	0	1
0	0	1	1	0	0	0	0	0	0	0	0	1	0	0	1
0	1	0	0	0	0	0	0	1	0	0	0	1	0	0	1
0	1	0	1	0	0	0	0	1	0	0	0	0	0	0	1
0	1	0	1	0	0	0	0	0	0	0	0	0	0	0	1
0	0	1	1	0	0	0	0	0	0	0	0	0	0	0	1
0	1	0	0	0	0	0	0	1	0	0	0	0	0	0	1
0	1	0	1	0	0	0	0	1	0	0	0	0	0	0	1
0	0	1	1	0	0	0	0	0	0	0	0	0	0	0	1
0	0	1	1	0	0	0	0	0	0	0	0	0	0	0	1
0	1	0	0	0	0	0	0	1	0	0	0	0	0	0	1
0	1	0	1	0	0	0	0	1	0	0	0	0	0	0	1
0	1	0	1	0	0	0	0	0	0	0	0	0	0	0	1
0	0	1	1	0	0	0	0	0	0	0	0	0	0	0	1
0	1	0	0	0	0	0	0	1	0	0	0	0	0	0	1
0	1	0	1	0	0	0	0	1	0	0	0	0	0	0	1
0	0	1	1	0	0	0	0	0	0	0	0	0	0	0	1
0	0	0	1	0	0	1	0	0	0	0	0	0	0	0	1
0	1	0	1	0	0	1	0	0	0	0	0	0	0	0	1
0	1	0	1	0	0	1	0	0	0	0	0	0	0	0	1
0	1	0	0	0	0	0	0	1	0	0	0	0	0	0	1
0	1	0	1	0	0	0	0	1	0	0	0	0	0	0	1
0	0	1	1	0	0	0	0	0	0	0	0	0	0	0	1
0	0	0	1	0	0	1	0	0	0	0	0	0	0	0	1
0	1	0	1	0	0	1	0	0	0	0	0	0	0	0	1
0	1	0	1	0	0	1	0	0	0	0	0	0	0	0	1
0	1	0	0	0	0	0	0	1	0	0	0	0	0	0	1
0	1	0	1	0	1	0	0	1	1	1	0	0	0	0	0
0	0	1	1	0	1	0	0	0	1	1	0	0	0	0	1
0	0	0	1	0	1	1	0	0	1	1	0	0	0	0	0
0	1	0	1	0	1	1	0	0	1	1	0	0	0	0	0
0	1	0	1	0	1	1	0	0	1	1	0	0	0	0	0
0	1	0	0	0	1	0	0	1	1	1	0	0	0	0	0
0	1	0	1	0	0	0	0	1	0	0	0	0	0	0	1
0	0	1	1	0	0	0	0	0	0	0	0	0	0	0	1
0	0	1	1	0	0	0	0	0	0	0	0	0	0	0	1
0	1	0	0	0	0	0	0	1	0	0	0	0	0	0	1
0	1	0	1	0	0	0	0	1	0	0	0	0	0	0	1
0	1	0	1	0	0	0	0	0	0	0	0	0	0	0	1
0	0	1	1	0	0	0	0	0	0	0	0	0	0	0	1
0	1	0	0	0	0	0	0	1	0	0	0	0	0	0	1
0	1	0	1	0	0	0	0	1	0	0	0	0	0	0	1
0	1	0	1	0	0	0	0	0	0	0	0	0	0	0	1
0	0	1	1	0	0	0	0	0	0	0	0	0	0	0	1
0	1	0	0	0	0	0	0	1	0	0	0	0	0	0	0
0	1	0	1	0	0	0	0	1	0	0	0	0	0	0	1
0	0	1	1	0	0	0	0	0	0	0	0	0	0	0	0
0	0	1	1	0	0	0	0	0	0	0	0	0	0	0	0
0	1	0	0	0	0	0	0	1	0	0	0	0	0	0	0
0	1	0	1	0	0	0	0	1	1	0	0	1	0	0	1
0	0	1	1	0	0	0	0	0	1	0	0	1	0	0	1
0	0	0	1	0	0	1	0	0	1	0	0	1	0	0	1
0	1	0	1	0	0	1	0	0	1	0	0	1	0	0	1
0	1	0	1	0	0	1	0	0	1	0	0	1	0	0	1
0	1	0	0	0	0	0	0	1	1	0	0	1	0	0	1
0	1	0	1	0	0	0	0	1	0	0	0	0	0	0	1
0	0	1	1	0	0	0	0	0	0	0	0	0	0	0	1
0	0	0	1	0	0	1	0	0	0	0	0	0	0	0	1
0	1	0	1	0	0	1	0	0	0	0	0	0	0	0	1
0	1	0	1	0	0	1	0	0	0	0	0	0	0	0	0
0	1	0	0	0	0	0	0	1	0	0	0	0	0	0	1
0	1	0	1	0	0	0	0	1	0	1	0	0	0	0	1
0	1	0	1	0	0	0	0	0	0	1	0	0	0	0	1
0	0	1	1	0	0	0	0	0	0	1	0	0	0	0	0
0	1	0	0	0	0	0	0	1	0	1	0	0	0	0	1
0	1	0	1	0	0	0	0	1	0	1	0	0	0	0	1
0	0	1	1	0	0	0	0	0	0	1	0	0	0	0	1
0	0	1	1	0	0	0	0	0	0	1	0	0	0	0	1
0	1	0	0	0	0	0	0	1	0	1	0	0	0	0	1
0	1	0	1	0	0	0	0	1	0	0	0	0	0	0	1
0	0	1	1	0	0	0	0	0	0	0	0	0	0	0	1
0	0	1	1	0	0	0	0	0	0	0	0	0	0	0	1
0	1	0	0	0	0	0	0	1	0	0	0	0	0	0	1
0	1	0	1	0	0	0	0	1	0	0	0	0	0	0	1
0	0	1	1	0	0	0	0	0	0	0	0	0	0	0	1
0	0	0	1	0	0	1	0	0	0	0	0	0	0	0	1
0	1	0	1	0	0	1	0	0	0	0	0	0	0	0	1
0	1	0	1	0	0	1	0	0	0	0	0	0	0	0	1
0	1	0	0	0	0	0	0	1	0	0	0	0	0	0	0
0	1	0	1	0	0	0	0	1	0	0	0	0	0	0	0
0	0	1	1	0	0	0	0	0	0	0	0	0	0	0	0
0	0	0	1	0	0	1	0	0	0	0	0	0	0	0	1
0	1	0	1	0	0	1	0	0	0	0	0	0	0	0	1
0	1	0	1	0	0	1	0	0	0	0	0	0	0	0	0
0	1	0	0	0	0	0	0	1	0	0	0	0	0	0	1
0	1	0	1	0	0	0	0	1	1	0	0	1	0	0	0
0	0	1	1	0	0	0	0	0	1	0	0	1	0	0	0
0	0	0	1	0	0	1	0	0	1	0	0	1	0	0	0
0	1	0	1	0	0	1	0	0	1	0	0	1	0	0	0
0	1	0	1	0	0	1	0	0	1	0	0	1	0	0	0
0	1	0	0	0	0	0	0	1	1	0	0	1	0	0	0
0	1	0	1	0	0	0	0	1	0	0	0	0	0	0	1
0	0	1	1	0	0	0	0	0	0	0	0	0	0	0	1
0	0	1	1	0	0	0	0	0	0	0	0	0	0	0	1
0	1	0	0	0	0	0	0	1	0	0	0	0	0	0	1
0	1	0	1	0	0	0	0	1	0	0	1	0	0	0	1
0	0	1	1	0	0	0	0	0	0	0	1	0	0	0	0
0	0	0	1	0	0	1	0	0	0	0	1	0	0	0	0
0	1	0	1	0	0	1	0	0	0	0	1	0	0	0	1
0	1	0	1	0	0	1	0	0	0	0	1	0	0	0	1
0	1	0	0	0	0	0	0	1	0	0	1	0	0	0	0
0	1	0	1	0	0	0	0	1	0	0	0	0	0	0	1
0	1	0	1	0	0	0	0	0	0	0	0	0	0	0	1
0	0	1	1	0	0	0	0	0	0	0	0	0	0	0	1
0	1	0	0	0	0	0	0	1	0	0	0	0	0	0	1
0	1	0	1	0	0	0	0	1	0	0	0	0	0	0	1
0	1	0	1	0	0	0	0	0	0	0	0	0	0	0	1
0	0	1	1	0	0	0	0	0	0	0	0	0	0	0	1
0	1	0	0	0	0	0	0	1	0	0	0	0	0	0	1
0	1	0	1	0	1	0	0	1	0	0	0	0	0	0	1
0	1	0	1	0	1	0	0	0	0	0	0	0	0	0	1
0	0	1	1	0	1	0	0	0	0	0	0	0	0	0	1
0	1	0	0	0	1	0	0	1	0	0	0	0	0	0	1
0	1	0	1	0	0	0	0	1	0	1	0	0	0	0	1
0	0	1	1	0	0	0	0	0	0	1	0	0	0	0	0
0	0	1	1	0	0	0	0	0	0	1	0	0	0	0	1
0	1	0	0	0	0	0	0	1	0	1	0	0	0	0	1
0	1	0	1	0	0	0	0	1	0	0	0	0	0	0	1
0	0	1	1	0	0	0	0	0	0	0	0	0	0	0	1
0	0	1	1	0	0	0	0	0	0	0	0	0	0	0	1
0	1	0	0	0	0	0	0	1	0	0	0	0	0	0	0
0	1	0	1	0	0	0	0	1	0	0	0	0	0	0	1
0	1	0	1	0	0	0	0	0	0	0	0	0	0	0	1
0	0	1	1	0	0	0	0	0	0	0	0	0	0	0	1
0	1	0	0	0	0	0	0	1	0	0	0	0	0	0	1
0	1	0	1	0	0	0	0	1	0	0	0	0	0	0	1
0	0	1	1	0	0	0	0	0	0	0	0	0	0	0	1
0	0	1	1	0	0	0	0	0	0	0	0	0	0	0	1
0	1	0	0	0	0	0	0	1	0	0	0	0	0	0	1
0	1	0	1	0	0	0	0	1	0	0	0	0	0	0	1
0	0	1	1	0	0	0	0	0	0	0	0	0	0	0	1
0	0	1	1	0	0	0	0	0	0	0	0	0	0	0	1
0	1	0	0	0	0	0	0	1	0	0	0	0	0	0	1
0	1	0	1	0	0	0	0	1	0	1	0	0	0	0	1
0	1	0	1	0	0	0	0	0	0	1	0	0	0	0	1
0	0	1	1	0	0	0	0	0	0	1	0	0	0	0	1
0	1	0	0	0	0	0	0	1	0	1	0	0	0	0	1
0	1	0	1	0	0	0	0	1	1	0	1	1	0	0	1
0	0	1	1	0	0	0	0	0	1	0	1	1	0	0	0
0	0	0	1	0	0	1	0	0	1	0	1	1	0	0	0
0	1	0	1	0	0	1	0	0	1	0	1	1	0	0	1
0	1	0	1	0	0	1	0	0	1	0	1	1	0	0	0
0	1	0	0	0	0	0	0	1	1	0	1	1	0	0	0
0	1	0	1	0	0	0	0	1	0	0	0	0	0	0	1
0	1	0	1	0	0	0	0	0	0	0	0	0	0	0	1
0	0	1	1	0	0	0	0	0	0	0	0	0	0	0	1
0	1	0	0	0	0	0	0	1	0	0	0	0	0	0	1
0	1	0	1	0	0	0	0	1	1	0	0	0	0	0	1
0	0	1	1	0	0	0	0	0	1	0	0	0	0	0	1
0	0	0	1	0	0	1	0	0	1	0	0	0	0	0	1
0	1	0	1	0	0	1	0	0	1	0	0	0	0	0	1
0	1	0	1	0	0	1	0	0	1	0	0	0	0	0	1
0	1	0	0	0	0	0	0	1	1	0	0	0	0	0	0
0	1	0	1	0	1	0	0	1	0	1	0	0	0	0	1
0	0	1	1	0	1	0	0	0	0	1	0	0	0	0	0
0	0	1	1	0	1	0	0	0	0	1	0	0	0	0	1
0	1	0	0	0	1	0	0	1	0	1	0	0	0	0	1
0	1	0	1	0	1	0	0	1	0	0	0	0	0	0	1
0	0	1	1	0	1	0	0	0	0	0	0	0	0	0	1
0	0	1	1	0	1	0	0	0	0	0	0	0	0	0	1
0	1	0	0	0	1	0	0	1	0	0	0	0	0	0	0
0	1	0	1	0	0	0	0	1	0	0	0	1	0	0	1
0	0	1	1	0	0	0	0	0	0	0	0	1	0	0	1
0	0	0	1	0	0	1	0	0	0	0	0	1	0	0	1
0	1	0	1	0	0	1	0	0	0	0	0	1	0	0	1
0	1	0	1	0	0	1	0	0	0	0	0	1	0	0	1
0	1	0	0	0	0	0	0	1	0	0	0	1	0	0	1
0	1	0	1	0	0	0	0	1	0	0	0	0	0	0	1
0	1	0	1	0	0	0	0	0	0	0	0	0	0	0	1
0	0	1	1	0	0	0	0	0	0	0	0	0	0	0	1
0	1	0	0	0	0	0	0	1	0	0	0	0	0	0	1
0	1	0	1	0	0	0	0	1	0	0	0	0	0	0	1
0	1	0	1	0	0	0	0	0	0	0	0	0	0	0	1
0	0	1	1	0	0	0	0	0	0	0	0	0	0	0	1
0	1	0	0	0	0	0	0	1	0	0	0	0	0	0	1
0	1	0	1	0	0	0	0	1	0	0	0	0	0	0	1
0	0	1	1	0	0	0	0	0	0	0	0	0	0	0	1
0	0	0	1	0	0	1	0	0	0	0	0	0	0	0	1
0	1	0	1	0	0	1	0	0	0	0	0	0	0	0	1
0	1	0	1	0	0	1	0	0	0	0	0	0	0	0	1
0	1	0	0	0	0	0	0	1	0	0	0	0	0	0	1
0	1	0	1	0	0	0	0	1	0	0	0	0	0	0	1
0	1	0	1	0	0	0	0	0	0	0	0	0	0	0	1
0	0	1	1	0	0	0	0	0	0	0	0	0	0	0	1
0	1	0	0	0	0	0	0	1	0	0	0	0	0	0	1
0	1	0	1	0	0	0	0	1	0	0	0	0	0	0	0
0	0	1	1	0	0	0	0	0	0	0	0	0	0	0	1
0	0	0	1	0	0	1	0	0	0	0	0	0	0	0	0
0	1	0	1	0	0	1	0	0	0	0	0	0	0	0	1
0	1	0	1	0	0	1	0	0	0	0	0	0	0	0	1
0	1	0	0	0	0	0	0	1	0	0	0	0	0	0	0
0	1	0	1	0	0	0	0	1	0	0	0	0	0	0	1
0	0	1	1	0	0	0	0	0	0	0	0	0	0	0	1
0	0	0	1	0	0	1	0	0	0	0	0	0	0	0	1
0	1	0	1	0	0	1	0	0	0	0	0	0	0	0	1
0	1	0	1	0	0	1	0	0	0	0	0	0	0	0	1
0	1	0	0	0	0	0	0	1	0	0	0	0	0	0	1
0	1	0	1	0	0	0	0	1	0	0	0	0	0	0	1
0	1	0	1	0	0	0	0	0	0	0	0	0	0	0	1
0	0	1	1	0	0	0	0	0	0	0	0	0	0	0	1
0	1	0	0	0	0	0	0	1	0	0	0	0	0	0	1
0	1	0	1	0	0	0	0	1	0	0	0	0	0	0	1
0	0	1	1	0	0	0	0	0	0	0	0	0	0	0	1
0	0	0	1	0	0	1	0	0	0	0	0	0	0	0	1
0	1	0	1	0	0	1	0	0	0	0	0	0	0	0	1
0	1	0	1	0	0	1	0	0	0	0	0	0	0	0	1
0	1	0	0	0	0	0	0	1	0	0	0	0	0	0	1
0	1	0	1	0	1	0	0	1	0	0	0	0	0	0	1
0	0	1	1	0	1	0	0	0	0	0	0	0	0	0	1
0	0	1	1	0	1	0	0	0	0	0	0	0	0	0	1
0	1	0	0	0	1	0	0	1	0	0	0	0	0	0	1
0	1	0	1	0	1	0	0	1	0	0	0	0	0	0	1
0	1	0	1	0	1	0	0	0	0	0	0	0	0	0	1
0	0	1	1	0	1	0	0	0	0	0	0	0	0	0	1
0	1	0	0	0	1	0	0	1	0	0	0	0	0	0	1
0	1	0	1	0	0	0	0	1	0	0	0	0	0	0	1
0	0	1	1	0	0	0	0	0	0	0	0	0	0	0	1
0	0	1	1	0	0	0	0	0	0	0	0	0	0	0	1
0	1	0	0	0	0	0	0	1	0	0	0	0	0	0	1
0	1	0	1	0	0	0	0	1	1	0	0	1	0	0	1
0	0	1	1	0	0	0	0	0	1	0	0	1	0	0	1
0	0	0	1	0	0	1	0	0	1	0	0	1	0	0	0
0	1	0	1	0	0	1	0	0	1	0	0	1	0	0	1
0	1	0	1	0	0	1	0	0	1	0	0	1	0	0	1
0	1	0	0	0	0	0	0	1	1	0	0	1	0	0	1
0	1	0	1	0	0	0	0	1	0	1	0	0	0	0	1
0	0	1	1	0	0	0	0	0	0	1	0	0	0	0	0
0	0	0	1	0	0	1	0	0	0	1	0	0	0	0	0
0	1	0	1	0	0	1	0	0	0	1	0	0	0	0	0
0	1	0	1	0	0	1	0	0	0	1	0	0	0	0	0
0	1	0	0	0	0	0	0	1	0	1	0	0	0	0	1
0	1	0	1	0	0	0	0	1	0	0	0	0	0	0	1
0	1	0	1	0	0	0	0	0	0	0	0	0	0	0	1
0	0	1	1	0	0	0	0	0	0	0	0	0	0	0	1
0	1	0	0	0	0	0	0	1	0	0	0	0	0	0	0
0	1	0	1	0	1	0	0	1	0	0	0	0	0	0	1
0	1	0	1	0	1	0	0	0	0	0	0	0	0	0	1
0	0	1	1	0	1	0	0	0	0	0	0	0	0	0	1
0	1	0	0	0	1	0	0	1	0	0	0	0	0	0	1
0	1	0	1	0	0	0	0	1	0	0	0	0	0	0	1
0	1	0	1	0	0	0	0	0	0	0	0	0	0	0	1
0	0	1	1	0	0	0	0	0	0	0	0	0	0	0	1
0	1	0	0	0	0	0	0	1	0	0	0	0	0	0	1
0	1	0	1	0	0	0	0	1	0	0	0	0	0	0	1
0	1	0	1	0	0	0	0	0	0	0	0	0	0	0	1
0	0	1	1	0	0	0	0	0	0	0	0	0	0	0	1
0	1	0	0	0	0	0	0	1	0	0	0	0	0	0	1
0	1	0	1	0	0	0	0	1	0	0	0	0	0	0	1
0	1	0	1	0	0	0	0	0	0	0	0	0	0	0	1
0	0	1	1	0	0	0	0	0	0	0	0	0	0	0	1
0	1	0	0	0	0	0	0	1	0	0	0	0	0	0	1
0	1	0	1	0	0	0	0	1	0	0	0	0	0	0	1
0	0	1	1	0	0	0	0	0	0	0	0	0	0	0	1
0	0	0	1	0	0	1	0	0	0	0	0	0	0	0	1
0	1	0	1	0	0	1	0	0	0	0	0	0	0	0	1
0	1	0	1	0	0	1	0	0	0	0	0	0	0	0	1
0	1	0	0	0	0	0	0	1	0	0	0	0	0	0	1
0	1	0	1	0	0	0	0	1	0	0	0	1	0	0	1
0	0	1	1	0	0	0	0	0	0	0	0	1	0	0	1
0	0	0	1	0	0	1	0	0	0	0	0	1	0	0	1
0	1	0	1	0	0	1	0	0	0	0	0	1	0	0	1
0	1	0	1	0	0	1	0	0	0	0	0	1	0	0	1
0	1	0	0	0	0	0	0	1	0	0	0	1	0	0	1
0	1	0	1	0	0	0	0	1	0	0	0	0	0	0	1
0	0	1	1	0	0	0	0	0	0	0	0	0	0	0	1
0	0	1	1	0	0	0	0	0	0	0	0	0	0	0	1
0	1	0	0	0	0	0	0	1	0	0	0	0	0	0	1
0	1	0	1	0	0	0	0	1	0	0	0	0	0	0	1
0	0	1	1	0	0	0	0	0	0	0	0	0	0	0	1
0	0	1	1	0	0	0	0	0	0	0	0	0	0	0	1
0	1	0	0	0	0	0	0	1	0	0	0	0	0	0	0
0	1	0	1	0	0	0	0	1	0	0	0	0	0	0	1
0	0	1	1	0	0	0	0	0	0	0	0	0	0	0	1
0	0	0	1	0	0	1	0	0	0	0	0	0	0	0	1
0	1	0	1	0	0	1	0	0	0	0	0	0	0	0	1
0	1	0	1	0	0	1	0	0	0	0	0	0	0	0	1
0	1	0	0	0	0	0	0	1	0	0	0	0	0	0	1
0	1	0	1	0	0	0	0	1	0	0	1	1	0	0	1
0	0	1	1	0	0	0	0	0	0	0	1	1	0	0	1
0	0	0	1	0	0	1	0	0	0	0	1	1	0	0	0
0	1	0	1	0	0	1	0	0	0	0	1	1	0	0	1
0	1	0	1	0	0	1	0	0	0	0	1	1	0	0	1
0	1	0	0	0	0	0	0	1	0	0	1	1	0	0	1
0	1	0	1	0	0	0	0	1	0	0	1	1	0	0	0
0	0	1	1	0	0	0	0	0	0	0	1	1	0	0	1
0	0	0	1	0	0	1	0	0	0	0	1	1	0	0	0
0	1	0	1	0	0	1	0	0	0	0	1	1	0	0	0
0	1	0	1	0	0	1	0	0	0	0	1	1	0	0	0
0	1	0	0	0	0	0	0	1	0	0	1	1	0	0	0
0	1	0	1	0	0	0	0	1	0	0	0	0	0	0	1
0	1	0	1	0	0	0	0	0	0	0	0	0	0	0	1
0	0	1	1	0	0	0	0	0	0	0	0	0	0	0	1
0	1	0	0	0	0	0	0	1	0	0	0	0	0	0	1
0	1	0	1	0	0	0	0	1	0	0	0	0	0	0	1
0	1	0	1	0	0	0	0	0	0	0	0	0	0	0	1
0	0	1	1	0	0	0	0	0	0	0	0	0	0	0	1
0	1	0	0	0	0	0	0	1	0	0	0	0	0	0	1
0	1	0	1	0	0	0	0	1	0	0	0	1	0	0	1
0	0	1	1	0	0	0	0	0	0	0	0	1	0	0	1
0	0	0	1	0	0	1	0	0	0	0	0	1	0	0	1
0	1	0	1	0	0	1	0	0	0	0	0	1	0	0	1
0	1	0	1	0	0	1	0	0	0	0	0	1	0	0	1
0	1	0	0	0	0	0	0	1	0	0	0	1	0	0	1
0	1	0	1	0	0	0	0	1	0	0	1	0	0	0	1
0	1	0	1	0	0	0	0	0	0	0	1	0	0	0	1
0	0	1	1	0	0	0	0	0	0	0	1	0	0	0	1
0	1	0	0	0	0	0	0	1	0	0	1	0	0	0	1
0	1	0	1	0	0	0	0	1	0	0	0	0	0	0	1
0	1	0	1	0	0	0	0	0	0	0	0	0	0	0	1
0	0	1	1	0	0	0	0	0	0	0	0	0	0	0	1
0	1	0	0	0	0	0	0	1	0	0	0	0	0	0	1
0	1	0	1	0	0	0	0	1	0	0	0	1	0	0	1
0	0	1	1	0	0	0	0	0	0	0	0	1	0	0	0
0	0	1	1	0	0	0	0	0	0	0	0	1	0	0	1
0	1	0	0	0	0	0	0	1	0	0	0	1	0	0	1
0	1	0	1	0	0	0	0	1	0	0	0	0	0	0	1
0	0	1	1	0	0	0	0	0	0	0	0	0	0	0	0
0	0	1	1	0	0	0	0	0	0	0	0	0	0	0	1
0	1	0	0	0	0	0	0	1	0	0	0	0	0	0	1
0	1	0	1	0	0	0	0	1	0	0	0	0	0	0	1
0	1	0	1	0	0	0	0	0	0	0	0	0	0	0	1
0	0	1	1	0	0	0	0	0	0	0	0	0	0	0	1
0	1	0	0	0	0	0	0	1	0	0	0	0	0	0	1
0	1	0	1	0	1	0	0	1	0	0	0	0	0	0	1
0	1	0	1	0	1	0	0	0	0	0	0	0	0	0	1
0	0	1	1	0	1	0	0	0	0	0	0	0	0	0	1
0	1	0	0	0	1	0	0	1	0	0	0	0	0	0	1
0	1	0	1	0	0	0	0	1	0	0	1	0	0	0	1
0	0	1	1	0	0	0	0	0	0	0	1	0	0	0	1
0	0	1	1	0	0	0	0	0	0	0	1	0	0	0	1
0	1	0	0	0	0	0	0	1	0	0	1	0	0	0	1
0	1	0	1	0	0	0	0	1	0	0	0	0	0	0	1
0	1	0	1	0	0	0	0	0	0	0	0	0	0	0	1
0	0	1	1	0	0	0	0	0	0	0	0	0	0	0	1
0	1	0	0	0	0	0	0	1	0	0	0	0	0	0	1
0	1	0	1	0	0	0	0	1	0	0	0	0	0	0	1
0	0	1	1	0	0	0	0	0	0	0	0	0	0	0	1
0	0	0	1	0	0	1	0	0	0	0	0	0	0	0	1
0	1	0	1	0	0	1	0	0	0	0	0	0	0	0	1
0	1	0	1	0	0	1	0	0	0	0	0	0	0	0	1
0	1	0	0	0	0	0	0	1	0	0	0	0	0	0	1
0	1	0	1	0	0	0	0	1	0	0	0	0	0	0	1
0	1	0	1	0	0	0	0	0	0	0	0	0	0	0	1
0	0	1	1	0	0	0	0	0	0	0	0	0	0	0	0
0	1	0	0	0	0	0	0	1	0	0	0	0	0	0	1
0	1	0	1	0	0	0	0	1	0	0	0	0	0	0	1
0	0	1	1	0	0	0	0	0	0	0	0	0	0	0	1
0	0	0	1	0	0	1	0	0	0	0	0	0	0	0	1
0	1	0	1	0	0	1	0	0	0	0	0	0	0	0	1
0	1	0	1	0	0	1	0	0	0	0	0	0	0	0	1
0	1	0	0	0	0	0	0	1	0	0	0	0	0	0	1
0	1	0	1	0	0	0	0	1	0	0	0	0	0	0	1
0	1	0	1	0	0	0	0	0	0	0	0	0	0	0	1
0	0	1	1	0	0	0	0	0	0	0	0	0	0	0	1
0	1	0	0	0	0	0	0	1	0	0	0	0	0	0	0
0	1	0	1	0	0	0	0	1	0	0	1	0	0	0	1
0	0	1	1	0	0	0	0	0	0	0	1	0	0	0	0
0	0	1	1	0	0	0	0	0	0	0	1	0	0	0	1
0	1	0	0	0	0	0	0	1	0	0	1	0	0	0	1
0	1	0	1	0	0	0	0	1	0	0	0	0	0	0	1
0	0	1	1	0	0	0	0	0	0	0	0	0	0	0	1
0	0	1	1	0	0	0	0	0	0	0	0	0	0	0	1
0	1	0	0	0	0	0	0	1	0	0	0	0	0	0	1
0	1	0	1	0	0	0	0	1	0	0	0	0	0	0	1
0	0	1	1	0	0	0	0	0	0	0	0	0	0	0	1
0	1	0	0	0	0	0	0	1	0	0	0	0	0	0	1
0	1	0	1	0	0	0	0	1	0	0	0	0	0	0	1
0	1	0	1	0	0	0	0	0	0	0	0	0	0	0	1
0	0	1	1	0	0	0	0	0	0	0	0	0	0	0	1
0	1	0	0	0	0	0	0	1	0	0	0	0	0	0	1
0	1	0	1	0	0	0	0	1	0	0	0	0	0	0	1
0	0	1	1	0	0	0	0	0	0	0	0	0	0	0	1
0	0	0	1	0	0	1	0	0	0	0	0	0	0	0	1
0	1	0	1	0	0	1	0	0	0	0	0	0	0	0	0
0	1	0	1	0	0	1	0	0	0	0	0	0	0	0	0
0	1	0	0	0	0	0	0	1	0	0	0	0	0	0	1
0	1	0	1	0	0	0	0	1	0	0	0	0	0	0	1
0	1	0	1	0	0	0	0	0	0	0	0	0	0	0	1
0	0	1	1	0	0	0	0	0	0	0	0	0	0	0	1
0	1	0	0	0	0	0	0	1	0	0	0	0	0	0	1
0	1	0	1	0	0	0	0	1	0	0	0	0	0	0	1
0	0	1	1	0	0	0	0	0	0	0	0	0	0	0	0
0	0	0	1	0	0	1	0	0	0	0	0	0	0	0	1
0	1	0	1	0	0	1	0	0	0	0	0	0	0	0	1
0	1	0	1	0	0	1	0	0	0	0	0	0	0	0	0
0	1	0	0	0	0	0	0	1	0	0	0	0	0	0	1
0	1	0	1	0	1	0	0	1	0	0	0	0	0	0	1
0	1	0	1	0	1	0	0	0	0	0	0	0	0	0	1
0	0	1	1	0	1	0	0	0	0	0	0	0	0	0	1
0	1	0	0	0	1	0	0	1	0	0	0	0	0	0	0
0	1	0	1	0	0	0	0	1	0	0	0	0	0	0	1
0	0	1	1	0	0	0	0	0	0	0	0	0	0	0	0
0	0	0	1	0	0	1	0	0	0	0	0	0	0	0	0
0	1	0	1	0	0	1	0	0	0	0	0	0	0	0	0
0	1	0	1	0	0	1	0	0	0	0	0	0	0	0	0
0	1	0	1	0	0	0	0	1	0	0	0	0	0	0	1
0	0	1	1	0	0	0	0	0	0	0	0	0	0	0	0
0	0	0	1	0	0	1	0	0	0	0	0	0	0	0	0
0	1	0	1	0	0	1	0	0	0	0	0	0	0	0	1
0	1	0	1	0	0	1	0	0	0	0	0	0	0	0	1
0	1	0	0	0	0	0	0	1	0	0	0	0	0	0	1
0	1	0	1	0	0	0	0	1	0	0	0	0	0	0	1
0	0	1	1	0	0	0	0	0	0	0	0	0	0	0	1
0	0	0	1	0	0	1	0	0	0	0	0	0	0	0	1
0	1	0	1	0	0	1	0	0	0	0	0	0	0	0	1
0	1	0	0	0	0	0	0	1	0	0	0	0	0	0	1
0	1	0	1	0	0	0	0	1	0	0	0	0	0	0	1
0	0	1	1	0	0	0	0	0	0	0	0	0	0	0	1
0	0	1	1	0	0	0	0	0	0	0	0	0	0	0	1
0	1	0	0	0	0	0	0	1	0	0	0	0	0	0	1
0	1	0	1	0	0	0	0	1	0	0	0	0	0	0	1
0	0	1	1	0	0	0	0	0	0	0	0	0	0	0	1
0	0	0	1	0	0	1	0	0	0	0	0	0	0	0	0
0	1	0	1	0	0	1	0	0	0	0	0	0	0	0	1
0	1	0	1	0	0	1	0	0	0	0	0	0	0	0	1
0	1	0	0	0	0	0	0	1	0	0	0	0	0	0	1
0	1	0	1	0	0	0	0	1	1	0	0	0	0	0	1
0	1	0	1	0	0	0	0	0	1	0	0	0	0	0	1
0	0	1	1	0	0	0	0	0	1	0	0	0	0	0	1
0	1	0	0	0	0	0	0	1	1	0	0	0	0	0	1
0	1	0	1	0	1	0	0	1	0	0	0	1	0	0	1
0	1	0	1	0	1	0	0	0	0	0	0	1	0	0	1
0	0	1	1	0	1	0	0	0	0	0	0	1	0	0	1
0	1	0	0	0	1	0	0	1	0	0	0	1	0	0	1
0	1	0	1	0	1	0	0	1	0	0	0	0	0	0	1
0	0	1	1	0	1	0	0	0	0	0	0	0	0	0	1
0	0	0	1	0	1	1	0	0	0	0	0	0	0	0	0
0	1	0	1	0	1	1	0	0	0	0	0	0	0	0	0
0	1	0	1	0	1	1	0	0	0	0	0	0	0	0	0
0	1	0	0	0	1	0	0	1	0	0	0	0	0	0	1
0	1	0	1	0	0	0	0	1	0	0	0	0	0	0	1
0	1	0	1	0	0	0	0	0	0	0	0	0	0	0	1
0	0	1	1	0	0	0	0	0	0	0	0	0	0	0	1
0	1	0	0	0	0	0	0	1	0	0	0	0	0	0	1
0	1	0	1	0	0	0	0	1	0	0	0	0	0	0	1
0	1	0	1	0	0	0	0	0	0	0	0	0	0	0	1
0	0	1	1	0	0	0	0	0	0	0	0	0	0	0	1
0	1	0	0	0	0	0	0	1	0	0	0	0	0	0	1
0	1	0	1	0	0	0	0	1	0	0	0	0	0	0	1
0	0	1	1	0	0	0	0	0	0	0	0	0	0	0	1
0	0	0	1	0	0	1	0	0	0	0	0	0	0	0	1
0	1	0	1	0	0	1	0	0	0	0	0	0	0	0	1
0	1	0	1	0	0	1	0	0	0	0	0	0	0	0	1
0	1	0	0	0	0	0	0	1	0	0	0	0	0	0	1
0	1	0	1	0	0	0	0	1	0	0	0	0	0	0	1
0	1	0	1	0	0	0	0	0	0	0	0	0	0	0	1
0	0	1	1	0	0	0	0	0	0	0	0	0	0	0	1
0	1	0	0	0	0	0	0	1	0	0	0	0	0	0	0
0	1	0	1	0	0	0	0	1	0	0	0	0	0	0	1
0	1	0	1	0	0	0	0	0	0	0	0	0	0	0	1
0	0	1	1	0	0	0	0	0	0	0	0	0	0	0	1
0	1	0	0	0	0	0	0	1	0	0	0	0	0	0	1
0	1	0	1	0	0	0	0	1	0	0	0	0	0	0	1
0	0	1	1	0	0	0	0	0	0	0	0	0	0	0	1
0	0	0	1	0	0	1	0	0	0	0	0	0	0	0	0
0	1	0	1	0	0	1	0	0	0	0	0	0	0	0	1
0	1	0	1	0	0	1	0	0	0	0	0	0	0	0	1
0	1	0	0	0	0	0	0	1	0	0	0	0	0	0	1
0	1	0	1	0	0	0	0	1	0	0	0	0	0	0	1
0	0	1	1	0	0	0	0	0	0	0	0	0	0	0	1
0	0	0	1	0	0	1	0	0	0	0	0	0	0	0	1
0	1	0	1	0	0	1	0	0	0	0	0	0	0	0	1
0	1	0	1	0	0	1	0	0	0	0	0	0	0	0	1
0	1	0	0	0	0	0	0	1	0	0	0	0	0	0	1
0	1	0	1	0	0	0	0	1	0	0	0	0	0	0	1
0	0	1	1	0	0	0	0	0	0	0	0	0	0	0	1
0	0	0	1	0	0	1	0	0	0	0	0	0	0	0	0
0	1	0	1	0	0	1	0	0	0	0	0	0	0	0	0
0	1	0	1	0	0	1	0	0	0	0	0	0	0	0	0
0	1	0	0	0	0	0	0	1	0	0	0	0	0	0	0
0	1	0	1	0	0	0	0	1	0	0	0	0	0	0	1
0	1	0	1	0	0	0	0	0	0	0	0	0	0	0	1
0	0	1	1	0	0	0	0	0	0	0	0	0	0	0	0
0	1	0	0	0	0	0	0	1	0	0	0	0	0	0	1
0	1	0	1	0	0	0	0	1	0	0	0	0	0	0	1
0	0	1	1	0	0	0	0	0	0	0	0	0	0	0	1
0	0	0	1	0	0	1	0	0	0	0	0	0	0	0	1
0	1	0	1	0	0	1	0	0	0	0	0	0	0	0	1
0	1	0	1	0	0	1	0	0	0	0	0	0	0	0	1
0	1	0	0	0	0	0	0	1	0	0	0	0	0	0	1
0	1	0	1	0	1	0	0	1	0	0	0	0	0	0	1
0	1	0	1	0	1	0	0	0	0	0	0	0	0	0	1
0	0	1	1	0	1	0	0	0	0	0	0	0	0	0	1
0	1	0	0	0	1	0	0	1	0	0	0	0	0	0	1
0	1	0	1	0	0	0	0	1	0	0	1	0	0	0	1
0	0	1	1	0	0	0	0	0	0	0	1	0	0	0	1
0	0	0	1	0	0	1	0	0	0	0	1	0	0	0	0
0	1	0	1	0	0	1	0	0	0	0	1	0	0	0	1
0	1	0	1	0	0	1	0	0	0	0	1	0	0	0	1
0	1	0	0	0	0	0	0	1	0	0	1	0	0	0	1
0	1	0	1	0	0	0	0	1	0	0	1	0	0	0	1
0	1	0	1	0	0	0	0	0	0	0	1	0	0	0	1
0	0	1	1	0	0	0	0	0	0	0	1	0	0	0	0
0	1	0	0	0	0	0	0	1	0	0	1	0	0	0	1
0	1	0	1	0	0	0	0	1	1	0	0	0	0	0	1
0	0	1	1	0	0	0	0	0	1	0	0	0	0	0	1
0	0	0	1	0	0	1	0	0	1	0	0	0	0	0	1
0	1	0	1	0	0	1	0	0	1	0	0	0	0	0	1
0	1	0	1	0	0	1	0	0	1	0	0	0	0	0	1
0	1	0	0	0	0	0	0	1	1	0	0	0	0	0	1
0	1	0	1	0	0	0	0	1	0	0	0	0	0	0	1
0	1	0	1	0	0	0	0	0	0	0	0	0	0	0	1
0	0	1	1	0	0	0	0	0	0	0	0	0	0	0	0
0	1	0	0	0	0	0	0	1	0	0	0	0	0	0	0
0	1	0	1	0	0	0	0	1	0	0	0	0	0	0	1
0	0	1	1	0	0	0	0	0	0	0	0	0	0	0	1
0	0	0	1	0	0	1	0	0	0	0	0	0	0	0	1
0	1	0	1	0	0	1	0	0	0	0	0	0	0	0	1
0	1	0	1	0	0	1	0	0	0	0	0	0	0	0	1
0	1	0	0	0	0	0	0	1	0	0	0	0	0	0	1
0	1	0	1	0	0	0	0	1	1	1	0	0	0	0	1
0	0	1	1	0	0	0	0	0	1	1	0	0	0	0	0
0	0	1	1	0	0	0	0	0	1	1	0	0	0	0	1
0	1	0	0	0	0	0	0	1	1	1	0	0	0	0	0
0	1	0	1	0	0	0	0	1	0	0	0	0	0	0	1
0	0	1	1	0	0	0	0	0	0	0	0	0	0	0	1
0	0	1	1	0	0	0	0	0	0	0	0	0	0	0	1
0	1	0	0	0	0	0	0	1	0	0	0	0	0	0	1
0	1	0	1	0	1	0	0	1	0	0	0	0	0	0	1
0	0	1	1	0	1	0	0	0	0	0	0	0	0	0	1
0	0	0	1	0	1	1	0	0	0	0	0	0	0	0	0
0	1	0	1	0	1	1	0	0	0	0	0	0	0	0	1
0	1	0	1	0	1	1	0	0	0	0	0	0	0	0	1
0	1	0	0	0	1	0	0	1	0	0	0	0	0	0	1
0	1	0	1	0	0	0	0	1	0	0	0	0	0	0	1
0	1	0	1	0	0	0	0	0	0	0	0	0	0	0	1
0	0	1	1	0	0	0	0	0	0	0	0	0	0	0	1
0	1	0	0	0	0	0	0	1	0	0	0	0	0	0	1
0	1	0	1	0	0	0	0	1	0	0	0	0	0	0	1
0	0	1	1	0	0	0	0	0	0	0	0	0	0	0	1
0	0	0	1	0	0	1	0	0	0	0	0	0	0	0	1
0	1	0	1	0	0	1	0	0	0	0	0	0	0	0	1
0	1	0	1	0	0	1	0	0	0	0	0	0	0	0	1
0	1	0	0	0	0	0	0	1	0	0	0	0	0	0	0
0	1	0	1	0	0	0	0	1	0	0	0	0	0	0	1
0	0	1	1	0	0	0	0	0	0	0	0	0	0	0	1
0	0	1	1	0	0	0	0	0	0	0	0	0	0	0	1
0	1	0	0	0	0	0	0	1	0	0	0	0	0	0	1
0	1	0	1	0	0	0	0	1	0	0	0	0	0	0	1
0	1	0	1	0	0	0	0	0	0	0	0	0	0	0	1
0	0	1	1	0	0	0	0	0	0	0	0	0	0	0	1
0	1	0	0	0	0	0	0	1	0	0	0	0	0	0	1
0	1	0	1	0	0	0	0	1	0	0	0	1	0	0	1
0	0	1	1	0	0	0	0	0	0	0	0	1	0	0	0
0	1	0	0	0	0	0	0	1	0	0	0	1	0	0	1
0	1	0	1	0	0	0	0	1	0	0	0	0	0	0	1
0	0	1	1	0	0	0	0	0	0	0	0	0	0	0	0
0	0	0	1	0	0	1	0	0	0	0	0	0	0	0	0
0	1	0	1	0	0	1	0	0	0	0	0	0	0	0	1
0	1	0	1	0	0	1	0	0	0	0	0	0	0	0	1
0	1	0	0	0	0	0	0	1	0	0	0	0	0	0	1
0	1	0	1	0	0	0	0	1	0	0	0	0	0	0	1
0	1	0	1	0	0	0	0	0	0	0	0	0	0	0	1
0	0	1	1	0	0	0	0	0	0	0	0	0	0	0	1
0	1	0	0	0	0	0	0	1	0	0	0	0	0	0	1
0	1	0	1	0	0	0	0	1	0	0	0	0	0	0	1
0	0	1	1	0	0	0	0	0	0	0	0	0	0	0	1
0	0	1	1	0	0	0	0	0	0	0	0	0	0	0	1
0	1	0	0	0	0	0	0	1	0	0	0	0	0	0	1
0	1	0	1	0	0	0	0	1	0	0	0	0	0	0	1
0	0	1	1	0	0	0	0	0	0	0	0	0	0	0	0
0	0	1	1	0	0	0	0	0	0	0	0	0	0	0	1
0	1	0	0	0	0	0	0	1	0	0	0	0	0	0	1
0	1	0	1	0	0	0	0	1	0	0	0	0	0	0	1
0	1	0	1	0	0	0	0	0	0	0	0	0	0	0	1
0	0	1	1	0	0	0	0	0	0	0	0	0	0	0	1
0	1	0	0	0	0	0	0	1	0	0	0	0	0	0	1
0	1	0	1	0	0	0	0	1	0	0	0	0	0	0	1
0	1	0	1	0	0	0	0	0	0	0	0	0	0	0	1
0	0	1	1	0	0	0	0	0	0	0	0	0	0	0	1
0	1	0	0	0	0	0	0	1	0	0	0	0	0	0	1
0	1	0	1	0	0	0	0	1	0	0	0	0	0	0	1
0	0	1	1	0	0	0	0	0	0	0	0	0	0	0	1
0	0	0	1	0	0	1	0	0	0	0	0	0	0	0	1
0	1	0	1	0	0	1	0	0	0	0	0	0	0	0	1
0	1	0	1	0	0	1	0	0	0	0	0	0	0	0	1
0	1	0	0	0	0	0	0	1	0	0	0	0	0	0	1
0	1	0	1	0	0	0	0	1	0	0	0	0	0	0	1
0	0	1	1	0	0	0	0	0	0	0	0	0	0	0	1
0	0	0	1	0	0	1	0	0	0	0	0	0	0	0	1
0	1	0	1	0	0	1	0	0	0	0	0	0	0	0	1
0	1	0	1	0	0	1	0	0	0	0	0	0	0	0	1
0	1	0	0	0	0	0	0	1	0	0	0	0	0	0	1
0	1	0	1	0	0	0	0	1	0	0	0	0	0	0	1
0	1	0	1	0	0	0	0	0	0	0	0	0	0	0	1
0	0	1	1	0	0	0	0	0	0	0	0	0	0	0	1
0	1	0	0	0	0	0	0	1	0	0	0	0	0	0	1
0	1	0	1	0	0	0	0	1	0	0	0	0	0	0	1
0	0	1	1	0	0	0	0	0	0	0	0	0	0	0	1
0	0	1	1	0	0	0	0	0	0	0	0	0	0	0	1
0	1	0	0	0	0	0	0	1	0	0	0	0	0	0	1
0	1	0	1	0	1	0	0	1	1	1	0	0	0	0	1
0	1	0	1	0	1	0	0	0	1	1	0	0	0	0	0
0	0	1	1	0	1	0	0	0	1	1	0	0	0	0	1
0	1	0	0	0	1	0	0	1	1	1	0	0	0	0	1
0	1	0	1	0	0	0	0	1	0	0	0	0	0	0	1
0	1	0	1	0	0	0	0	0	0	0	0	0	0	0	1
0	0	1	1	0	0	0	0	0	0	0	0	0	0	0	1
0	1	0	0	0	0	0	0	1	0	0	0	0	0	0	1
0	1	0	1	0	0	0	0	1	0	0	0	0	0	0	1
0	0	1	1	0	0	0	0	0	0	0	0	0	0	0	1
0	0	0	1	0	0	1	0	0	0	0	0	0	0	0	1
0	1	0	1	0	0	1	0	0	0	0	0	0	0	0	1
0	1	0	1	0	0	1	0	0	0	0	0	0	0	0	1
0	1	0	0	0	0	0	0	1	0	0	0	0	0	0	1
0	1	0	1	0	0	0	0	1	0	0	0	0	0	0	1
0	0	1	1	0	0	0	0	0	0	0	0	0	0	0	1
0	0	1	1	0	0	0	0	0	0	0	0	0	0	0	1
0	1	0	0	0	0	0	0	1	0	0	0	0	0	0	1
0	1	0	1	0	1	0	0	1	0	0	0	0	0	0	1
0	0	1	1	0	1	0	0	0	0	0	0	0	0	0	1
0	0	1	1	0	1	0	0	0	0	0	0	0	0	0	1
0	1	0	0	0	1	0	0	1	0	0	0	0	0	0	0
0	1	0	1	0	0	0	0	1	0	0	0	0	0	0	1
0	1	0	1	0	0	0	0	0	0	0	0	0	0	0	1
0	0	1	1	0	0	0	0	0	0	0	0	0	0	0	1
0	1	0	0	0	0	0	0	1	0	0	0	0	0	0	1
0	1	0	1	0	0	0	0	1	0	0	0	0	0	0	1
0	0	1	1	0	0	0	0	0	0	0	0	0	0	0	1
0	0	1	1	0	0	0	0	0	0	0	0	0	0	0	1
0	1	0	0	0	0	0	0	1	0	0	0	0	0	0	1
0	1	0	1	0	0	0	0	1	0	0	0	0	0	0	1
0	0	1	1	0	0	0	0	0	0	0	0	0	0	0	1
0	0	0	1	0	0	1	0	0	0	0	0	0	0	0	1
0	1	0	1	0	0	1	0	0	0	0	0	0	0	0	1
0	1	0	1	0	0	1	0	0	0	0	0	0	0	0	1
0	1	0	0	0	0	0	0	1	0	0	0	0	0	0	0
0	1	0	1	0	0	0	0	1	0	0	0	0	0	0	1
0	1	0	1	0	0	0	0	0	0	0	0	0	0	0	1
0	0	1	1	0	0	0	0	0	0	0	0	0	0	0	1
0	1	0	0	0	0	0	0	1	0	0	0	0	0	0	1
0	1	0	1	0	0	0	0	1	0	0	0	0	0	0	0
0	0	1	1	0	0	0	0	0	0	0	0	0	0	0	0
0	0	1	1	0	0	0	0	0	0	0	0	0	0	0	0
0	1	0	0	0	0	0	0	1	0	0	0	0	0	0	0
0	1	0	1	0	1	0	0	1	0	0	0	0	0	0	1
0	0	1	1	0	1	0	0	0	0	0	0	0	0	0	0
0	0	0	1	0	1	1	0	0	0	0	0	0	0	0	0
0	1	0	1	0	1	1	0	0	0	0	0	0	0	0	1
0	1	0	1	0	1	1	0	0	0	0	0	0	0	0	0
0	1	0	0	0	1	0	0	1	0	0	0	0	0	0	1
0	1	0	1	0	0	0	0	1	0	0	0	0	0	0	0
0	1	0	1	0	0	0	0	0	0	0	0	0	0	0	0
0	0	1	1	0	0	0	0	0	0	0	0	0	0	0	0
0	1	0	0	0	0	0	0	1	0	0	0	0	0	0	1
0	1	0	1	0	0	0	0	1	0	0	0	0	0	0	1
0	0	1	1	0	0	0	0	0	0	0	0	0	0	0	1
0	0	1	1	0	0	0	0	0	0	0	0	0	0	0	1
0	1	0	0	0	0	0	0	1	0	0	0	0	0	0	0
0	1	0	1	0	0	0	0	1	0	0	0	0	0	0	1
0	1	0	1	0	0	0	0	0	0	0	0	0	0	0	1
0	0	1	1	0	0	0	0	0	0	0	0	0	0	0	1
0	1	0	0	0	0	0	0	1	0	0	0	0	0	0	1
0	1	0	1	0	0	0	0	1	0	0	0	0	0	0	1
0	1	0	1	0	0	0	0	0	0	0	0	0	0	0	1
0	0	1	1	0	0	0	0	0	0	0	0	0	0	0	1
0	1	0	0	0	0	0	0	1	0	0	0	0	0	0	1
0	1	0	1	0	0	0	0	1	0	0	0	0	0	0	1
0	0	1	1	0	0	0	0	0	0	0	0	0	0	0	1
0	0	0	1	0	0	1	0	0	0	0	0	0	0	0	0
0	1	0	1	0	0	1	0	0	0	0	0	0	0	0	1
0	1	0	1	0	0	1	0	0	0	0	0	0	0	0	1
0	1	0	0	0	0	0	0	1	0	0	0	0	0	0	1
0	1	0	1	0	0	0	0	1	0	0	0	0	0	0	1
0	1	0	1	0	0	0	0	0	0	0	0	0	0	0	1
0	0	1	1	0	0	0	0	0	0	0	0	0	0	0	1
0	1	0	0	0	0	0	0	1	0	0	0	0	0	0	1
0	1	0	1	0	0	0	0	1	0	0	0	1	0	0	1
0	1	0	1	0	0	0	0	0	0	0	0	1	0	0	1
0	0	1	1	0	0	0	0	0	0	0	0	1	0	0	1
0	1	0	0	0	0	0	0	1	0	0	0	1	0	0	1
0	0	0	1	0	0	0	0	0	0	0	1	0	0	0	1
0	1	1	1	0	0	0	0	0	0	0	1	0	0	0	1
0	1	0	1	0	0	1	0	0	0	0	1	0	0	0	1
0	0	0	1	0	0	1	0	0	0	0	1	0	0	0	1
0	0	1	0	0	0	0	0	1	0	0	1	0	0	1	1
0	0	0	0	1	0	0	0	1	0	0	1	0	0	1	1
0	0	0	1	0	0	0	0	0	1	0	0	0	0	0	0
0	1	1	1	0	0	0	0	0	1	0	0	0	0	0	1
0	1	1	1	0	0	0	0	0	1	0	0	0	0	0	1
0	0	1	0	0	0	0	0	1	1	0	0	0	0	1	0
0	0	0	0	1	0	0	0	1	1	0	0	0	0	1	0
0	0	0	1	0	0	0	0	0	0	0	0	0	0	0	1
0	1	1	1	0	0	0	0	0	0	0	0	0	0	0	1
0	1	1	1	0	0	0	0	0	0	0	0	0	0	0	1
0	0	1	0	0	0	0	0	1	0	0	0	0	0	1	1
0	0	0	0	1	0	0	0	1	0	0	0	0	0	1	1
0	0	0	1	0	0	0	0	0	0	0	0	1	0	0	1
0	1	1	1	0	0	0	0	0	0	0	0	1	0	0	1
0	1	0	1	0	0	1	0	0	0	0	0	1	0	0	1
0	0	0	1	0	0	1	0	0	0	0	0	1	0	0	1
0	0	1	0	0	0	0	0	1	0	0	0	1	0	1	1
0	0	0	0	1	0	0	0	1	0	0	0	1	0	1	1
0	0	0	1	0	0	0	0	0	0	0	0	0	0	0	1
0	1	1	1	0	0	0	0	0	0	0	0	0	0	0	1
0	1	1	1	0	0	0	0	0	0	0	0	0	0	0	1
0	0	1	0	0	0	0	0	1	0	0	0	0	0	1	1
0	0	0	0	1	0	0	0	1	0	0	0	0	0	1	1
0	0	0	1	0	0	0	0	0	0	0	0	0	0	0	0
0	1	1	1	0	0	0	0	0	0	0	0	0	0	0	1
0	1	0	1	0	0	1	0	0	0	0	0	0	0	0	1
0	0	0	1	0	0	1	0	0	0	0	0	0	0	0	0
0	0	1	0	0	0	0	0	1	0	0	0	0	0	1	1
0	0	0	0	1	0	0	0	1	0	0	0	0	0	1	0
0	0	0	1	0	0	0	0	0	0	0	1	0	0	0	1
0	1	1	1	0	0	0	0	0	0	0	1	0	0	0	1
0	1	0	1	0	0	1	0	0	0	0	1	0	0	0	1
0	0	0	1	0	0	1	0	0	0	0	1	0	0	0	1
0	0	1	0	0	0	0	0	1	0	0	1	0	0	1	1
0	0	0	0	1	0	0	0	1	0	0	1	0	0	1	1
0	0	0	1	0	0	0	0	0	0	0	0	0	0	0	1
0	1	1	1	0	0	0	0	0	0	0	0	0	0	0	1
0	1	1	1	0	0	0	0	0	0	0	0	0	0	0	1
0	0	1	0	0	0	0	0	1	0	0	0	0	0	1	0
0	0	0	0	1	0	0	0	1	0	0	0	0	0	1	1
0	0	0	1	0	0	0	0	0	0	0	0	0	0	0	1
0	1	1	1	0	0	0	0	0	0	0	0	0	0	0	1
0	0	0	1	0	0	0	0	1	0	0	0	0	0	0	1
0	0	1	0	0	0	0	0	1	0	0	0	0	0	1	1
0	0	0	0	1	0	0	0	1	0	0	0	0	0	1	0
0	0	0	1	0	0	0	0	0	0	0	0	0	0	0	1
0	1	1	1	0	0	0	0	0	0	0	0	0	0	0	1
0	1	1	1	0	0	0	0	0	0	0	0	0	0	0	1
0	0	1	0	0	0	0	0	1	0	0	0	0	0	1	1
0	0	0	0	1	0	0	0	1	0	0	0	0	0	1	1
0	0	0	1	0	0	0	0	0	0	0	1	0	0	0	0
0	1	1	1	0	0	0	0	0	0	0	1	0	0	0	1
0	0	0	1	0	0	0	0	1	0	0	1	0	0	0	1
0	0	1	0	0	0	0	0	1	0	0	1	0	0	1	0
0	0	0	0	1	0	0	0	1	0	0	1	0	0	1	0
0	0	0	1	0	0	0	0	0	0	0	0	0	0	0	0
0	1	1	1	0	0	0	0	0	0	0	0	0	0	0	1
0	0	0	1	0	0	0	0	1	0	0	0	0	0	0	1
0	0	1	0	0	0	0	0	1	0	0	0	0	0	1	0
0	0	0	0	1	0	0	0	1	0	0	0	0	0	1	1
0	0	0	1	0	0	0	0	0	0	0	0	0	0	0	0
0	1	1	1	0	0	0	0	0	0	0	0	0	0	0	1
0	0	0	1	0	0	0	0	1	0	0	0	0	0	0	0
0	0	1	0	0	0	0	0	1	0	0	0	0	0	1	0
0	0	0	0	1	0	0	0	1	0	0	0	0	0	1	0
0	0	0	1	0	0	0	0	0	0	0	0	0	0	0	1
0	1	1	1	0	0	0	0	0	0	0	0	0	0	0	1
0	1	1	1	0	0	0	0	0	0	0	0	0	0	0	1
0	0	1	0	0	0	0	0	1	0	0	0	0	0	1	1
0	0	0	0	1	0	0	0	1	0	0	0	0	0	1	0
0	0	0	1	0	0	0	0	0	0	0	0	0	0	0	1
0	1	1	1	0	0	0	0	0	0	0	0	0	0	0	1
0	0	0	1	0	0	0	0	1	0	0	0	0	0	0	1
0	0	1	0	0	0	0	0	1	0	0	0	0	0	1	1
0	0	0	0	1	0	0	0	1	0	0	0	0	0	1	1
0	0	0	1	0	0	0	0	0	0	0	0	0	0	0	1
0	1	1	1	0	0	0	0	0	0	0	0	0	0	0	1
0	1	1	1	0	0	0	0	0	0	0	0	0	0	0	1
0	0	1	0	0	0	0	0	1	0	0	0	0	0	1	1
0	0	0	0	1	0	0	0	1	0	0	0	0	0	1	1
0	0	0	1	0	0	0	0	0	0	0	0	0	0	0	1
0	1	1	1	0	0	0	0	0	0	0	0	0	0	0	1
0	1	1	1	0	0	0	0	0	0	0	0	0	0	0	1
0	0	1	0	0	0	0	0	1	0	0	0	0	0	1	1
0	0	0	0	1	0	0	0	1	0	0	0	0	0	1	1
0	0	0	1	0	0	0	0	0	0	0	0	0	0	0	1
0	1	1	1	0	0	0	0	0	0	0	0	0	0	0	1
0	1	1	1	0	0	0	0	0	0	0	0	0	0	0	1
0	0	1	0	0	0	0	0	1	0	0	0	0	0	1	1
0	0	0	0	1	0	0	0	1	0	0	0	0	0	1	0
0	0	0	1	0	1	0	0	0	0	0	0	0	0	0	0
0	1	1	1	0	1	0	0	0	0	0	0	0	0	0	1
0	0	0	1	0	1	0	0	1	0	0	0	0	0	0	1
0	0	1	0	0	1	0	0	1	0	0	0	0	0	1	1
0	0	0	0	1	1	0	0	1	0	0	0	0	0	1	0
0	0	0	1	0	0	0	0	0	0	0	0	1	0	0	1
0	1	1	1	0	0	0	0	0	0	0	0	1	0	0	1
0	1	1	1	0	0	0	0	0	0	0	0	1	0	0	1
0	0	1	0	0	0	0	0	1	0	0	0	1	0	1	0
0	0	0	0	1	0	0	0	1	0	0	0	1	0	1	0
0	0	0	1	0	0	0	0	0	0	0	1	0	0	0	1
0	1	1	1	0	0	0	0	0	0	0	1	0	0	0	1
0	1	1	1	0	0	0	0	0	0	0	1	0	0	0	1
0	0	1	0	0	0	0	0	1	0	0	1	0	0	1	1
0	0	0	0	1	0	0	0	1	0	0	1	0	0	1	0
0	0	0	1	0	0	0	0	0	0	0	0	1	0	0	0
0	1	1	1	0	0	0	0	0	0	0	0	1	0	0	1
0	0	0	1	0	0	0	0	1	0	0	0	1	0	0	1
0	0	1	0	0	0	0	0	1	0	0	0	1	0	1	1
0	0	0	0	1	0	0	0	1	0	0	0	1	0	1	0
0	0	0	1	0	0	0	0	0	0	0	0	0	0	0	1
0	1	1	1	0	0	0	0	0	0	0	0	0	0	0	1
0	0	0	1	0	0	0	0	1	0	0	0	0	0	0	1
0	0	1	0	0	0	0	0	1	0	0	0	0	0	1	1
0	0	0	0	1	0	0	0	1	0	0	0	0	0	1	1
0	0	0	1	0	0	0	0	0	0	0	1	1	0	0	1
0	1	1	1	0	0	0	0	0	0	0	1	1	0	0	1
0	1	1	1	0	0	0	0	0	0	0	1	1	0	0	1
0	0	1	0	0	0	0	0	1	0	0	1	1	0	1	1
0	0	0	0	1	0	0	0	1	0	0	1	1	0	1	0
0	0	0	1	0	1	0	0	0	0	0	0	0	0	0	1
0	1	1	1	0	1	0	0	0	0	0	0	0	0	0	1
0	1	0	1	0	1	1	0	0	0	0	0	0	0	0	0
0	0	0	1	0	1	1	0	0	0	0	0	0	0	0	0
0	0	1	0	0	1	0	0	1	0	0	0	0	0	1	0
0	0	0	0	1	1	0	0	1	0	0	0	0	0	1	0
0	0	0	1	0	0	0	0	0	0	0	0	0	0	0	1
0	1	1	1	0	0	0	0	0	0	0	0	0	0	0	1
0	1	0	1	0	0	1	0	0	0	0	0	0	0	0	1
0	0	0	1	0	0	1	0	0	0	0	0	0	0	0	1
0	0	1	0	0	0	0	0	1	0	0	0	0	0	1	0
0	0	0	0	1	0	0	0	1	0	0	0	0	0	1	1
0	0	0	1	0	0	0	0	0	0	0	0	0	0	0	1
0	1	1	1	0	0	0	0	0	0	0	0	0	0	0	1
0	1	1	1	0	0	0	0	0	0	0	0	0	0	0	1
0	0	0	0	1	0	0	0	1	0	0	0	0	0	1	0
0	0	0	1	0	0	0	0	0	0	0	0	1	0	0	1
0	1	1	1	0	0	0	0	0	0	0	0	1	0	0	1
0	1	1	1	0	0	0	0	0	0	0	0	1	0	0	1
0	0	1	0	0	0	0	0	1	0	0	0	1	0	1	1
0	0	0	0	1	0	0	0	1	0	0	0	1	0	1	1
0	0	0	1	0	0	0	0	0	0	0	0	0	0	0	1
0	1	1	1	0	0	0	0	0	0	0	0	0	0	0	1
0	0	0	1	0	0	0	0	1	0	0	0	0	0	0	1
0	0	1	0	0	0	0	0	1	0	0	0	0	0	1	1
0	0	0	0	1	0	0	0	1	0	0	0	0	0	1	1
0	0	0	1	0	0	0	0	0	0	0	0	0	0	0	0
0	1	1	1	0	0	0	0	0	0	0	0	0	0	0	1
0	0	0	1	0	0	0	0	1	0	0	0	0	0	0	0
0	0	1	0	0	0	0	0	1	0	0	0	0	0	1	0
0	0	0	0	1	0	0	0	1	0	0	0	0	0	1	0
0	0	0	1	0	0	0	0	0	0	0	0	0	0	0	1
0	1	1	1	0	0	0	0	0	0	0	0	0	0	0	1
0	1	1	1	0	0	0	0	0	0	0	0	0	0	0	1
0	0	1	0	0	0	0	0	1	0	0	0	0	0	1	1
0	0	0	0	1	0	0	0	1	0	0	0	0	0	1	0
0	0	0	1	0	1	0	0	0	0	0	0	0	0	0	1
0	1	1	1	0	1	0	0	0	0	0	0	0	0	0	1
0	1	0	1	0	1	1	0	0	0	0	0	0	0	0	1
0	0	0	1	0	1	1	0	0	0	0	0	0	0	0	0
0	0	1	0	0	1	0	0	1	0	0	0	0	0	1	1
0	0	0	0	1	1	0	0	1	0	0	0	0	0	1	0
0	0	0	1	0	0	0	0	0	0	0	0	0	0	0	0
0	1	1	1	0	0	0	0	0	0	0	0	0	0	0	1
0	1	1	1	0	0	0	0	0	0	0	0	0	0	0	1
0	0	1	0	0	0	0	0	1	0	0	0	0	0	1	1
0	0	0	0	1	0	0	0	1	0	0	0	0	0	1	1
0	0	0	1	0	1	0	0	0	0	1	0	0	0	0	1
0	1	1	1	0	1	0	0	0	0	1	0	0	0	0	1
0	0	0	1	0	1	0	0	1	0	1	0	0	0	0	1
0	0	1	0	0	1	0	0	1	0	1	0	0	0	1	1
0	0	0	0	1	1	0	0	1	0	1	0	0	0	1	0
0	0	0	1	0	1	0	0	0	0	0	0	0	0	0	1
0	1	1	1	0	1	0	0	0	0	0	0	0	0	0	1
0	1	1	1	0	1	0	0	0	0	0	0	0	0	0	1
0	0	1	0	0	1	0	0	1	0	0	0	0	0	1	1
0	0	0	0	1	1	0	0	1	0	0	0	0	0	1	0
0	0	0	1	0	1	0	0	0	0	0	0	0	0	0	0
0	1	1	1	0	1	0	0	0	0	0	0	0	0	0	1
0	0	0	1	0	1	0	0	1	0	0	0	0	0	0	1
0	0	1	0	0	1	0	0	1	0	0	0	0	0	1	0
0	0	0	0	1	1	0	0	1	0	0	0	0	0	1	0
0	0	0	1	0	0	0	0	0	0	0	0	0	0	0	1
0	1	1	1	0	0	0	0	0	0	0	0	0	0	0	1
0	0	0	1	0	0	0	0	1	0	0	0	0	0	0	1
0	0	1	0	0	0	0	0	1	0	0	0	0	0	1	1
0	0	0	0	1	0	0	0	1	0	0	0	0	0	1	1
0	0	0	1	0	0	0	0	0	0	0	0	0	0	0	0
0	1	1	1	0	0	0	0	0	0	0	0	0	0	0	1
0	0	0	1	0	0	0	0	1	0	0	0	0	0	0	0
0	0	1	0	0	0	0	0	1	0	0	0	0	0	1	0
0	0	0	0	1	0	0	0	1	0	0	0	0	0	1	0
0	0	0	1	0	0	0	0	0	0	0	0	0	0	0	0
0	1	1	1	0	0	0	0	0	0	0	0	0	0	0	1
0	0	0	1	0	0	0	0	1	0	0	0	0	0	0	1
0	0	1	0	0	0	0	0	1	0	0	0	0	0	1	0
0	0	0	0	1	0	0	0	1	0	0	0	0	0	1	0
0	0	0	1	0	0	0	0	0	0	0	0	0	0	0	1
0	1	1	1	0	0	0	0	0	0	0	0	0	0	0	1
0	1	0	1	0	0	1	0	0	0	0	0	0	0	0	1
0	0	0	1	0	0	1	0	0	0	0	0	0	0	0	1
0	0	1	0	0	0	0	0	1	0	0	0	0	0	1	0
0	0	0	0	1	0	0	0	1	0	0	0	0	0	1	0
0	0	0	1	0	1	0	0	0	0	0	0	0	0	0	1
0	1	1	1	0	1	0	0	0	0	0	0	0	0	0	1
0	1	0	1	0	1	1	0	0	0	0	0	0	0	0	1
0	0	0	1	0	1	1	0	0	0	0	0	0	0	0	1
0	0	1	0	0	1	0	0	1	0	0	0	0	0	1	1
0	0	0	0	1	1	0	0	1	0	0	0	0	0	1	1
0	0	0	1	0	0	0	0	0	0	0	0	0	0	0	1
0	1	1	1	0	0	0	0	0	0	0	0	0	0	0	1
0	0	0	1	0	0	0	0	1	0	0	0	0	0	0	1
0	0	1	0	0	0	0	0	1	0	0	0	0	0	1	0
0	0	0	0	1	0	0	0	1	0	0	0	0	0	1	1
0	0	0	1	0	0	0	0	0	0	0	0	0	0	0	1
0	1	1	1	0	0	0	0	0	0	0	0	0	0	0	1
0	0	0	1	0	0	0	0	1	0	0	0	0	0	0	1
0	0	1	0	0	0	0	0	1	0	0	0	0	0	1	0
0	0	0	0	1	0	0	0	1	0	0	0	0	0	1	0
0	0	0	1	0	1	0	0	0	0	0	0	0	0	0	0
0	1	1	1	0	1	0	0	0	0	0	0	0	0	0	1
0	0	0	1	0	1	0	0	1	0	0	0	0	0	0	0
0	0	1	0	0	1	0	0	1	0	0	0	0	0	1	0
0	0	0	0	1	1	0	0	1	0	0	0	0	0	1	0
0	0	0	1	0	0	0	0	0	0	0	0	0	0	0	1
0	1	1	1	0	0	0	0	0	0	0	0	0	0	0	1
0	1	1	1	0	0	0	0	0	0	0	0	0	0	0	1
0	0	1	0	0	0	0	0	1	0	0	0	0	0	1	1
0	0	0	0	1	0	0	0	1	0	0	0	0	0	1	1
0	0	0	1	0	0	0	0	0	0	0	0	0	0	0	1
0	1	1	1	0	0	0	0	0	0	0	0	0	0	0	1
0	0	0	1	0	0	0	0	1	0	0	0	0	0	0	1
0	1	1	1	0	0	0	0	0	0	0	0	0	0	0	1
0	1	0	1	0	0	1	0	0	0	0	0	0	0	0	1
0	0	0	1	0	0	1	0	0	0	0	0	0	0	0	1
0	0	1	0	0	0	0	0	1	0	0	0	0	0	1	1
0	0	0	0	1	0	0	0	1	0	0	0	0	0	1	1
0	0	0	1	0	0	0	0	0	0	0	1	1	0	0	1
0	1	1	1	0	0	0	0	0	0	0	1	1	0	0	1
0	1	1	1	0	0	0	0	0	0	0	1	1	0	0	0
0	0	1	0	0	0	0	0	1	0	0	1	1	0	1	1
0	0	0	0	1	0	0	0	1	0	0	1	1	0	1	1
0	0	0	1	0	0	0	0	0	0	0	0	0	0	0	0
0	1	1	1	0	0	0	0	0	0	0	0	0	0	0	1
0	0	0	1	0	0	0	0	1	0	0	0	0	0	0	1
0	0	1	0	0	0	0	0	1	0	0	0	0	0	1	1
0	0	0	0	1	0	0	0	1	0	0	0	0	0	1	0
0	0	0	1	0	0	0	0	0	0	0	0	0	0	0	1
0	1	1	1	0	0	0	0	0	0	0	0	0	0	0	1
0	0	0	1	0	0	0	0	1	0	0	0	0	0	0	1
0	0	1	0	0	0	0	0	1	0	0	0	0	0	1	1
0	0	0	0	1	0	0	0	1	0	0	0	0	0	1	1
0	0	0	1	0	0	0	0	0	0	0	0	0	0	0	1
0	1	1	1	0	0	0	0	0	0	0	0	0	0	0	0
0	0	0	1	0	0	0	0	1	0	0	0	0	0	0	0
0	0	1	0	0	0	0	0	1	0	0	0	0	0	1	1
0	0	0	0	1	0	0	0	1	0	0	0	0	0	1	0
0	0	0	1	0	0	0	0	0	0	0	0	1	0	0	0
0	1	1	1	0	0	0	0	0	0	0	0	1	0	0	1
0	1	1	1	0	0	0	0	0	0	0	0	1	0	0	1
0	0	1	0	0	0	0	0	1	0	0	0	1	0	1	0
0	0	0	0	1	0	0	0	1	0	0	0	1	0	1	0
0	0	0	1	0	0	0	0	0	0	0	0	0	0	0	0
0	1	1	1	0	0	0	0	0	0	0	0	0	0	0	1
0	0	0	1	0	0	0	0	1	0	0	0	0	0	0	0
0	0	1	0	0	0	0	0	1	0	0	0	0	0	1	0
0	0	0	0	1	0	0	0	1	0	0	0	0	0	1	0
0	0	0	1	0	0	0	0	0	0	0	0	0	0	0	0
0	1	1	1	0	0	0	0	0	0	0	0	0	0	0	1
0	1	0	1	0	0	1	0	0	0	0	0	0	0	0	0
0	0	0	1	0	0	1	0	0	0	0	0	0	0	0	0
0	0	1	0	0	0	0	0	1	0	0	0	0	0	1	0
0	0	0	0	1	0	0	0	1	0	0	0	0	0	1	0
0	0	0	1	0	0	0	0	0	0	0	0	0	0	0	0
0	1	1	1	0	0	0	0	0	0	0	0	0	0	0	1
0	1	0	1	0	0	1	0	0	0	0	0	0	0	0	0
0	0	0	1	0	0	1	0	0	0	0	0	0	0	0	1
0	0	1	0	0	0	0	0	1	0	0	0	0	0	1	0
0	0	0	0	1	0	0	0	1	0	0	0	0	0	1	0
0	0	0	1	0	0	0	0	0	0	0	0	0	0	0	0
0	1	1	1	0	0	0	0	0	0	0	0	0	0	0	1
0	1	1	1	0	0	0	0	0	0	0	0	0	0	0	1
0	0	1	0	0	0	0	0	1	0	0	0	0	0	1	0
0	0	0	0	1	0	0	0	1	0	0	0	0	0	1	0
0	0	0	1	0	0	0	0	0	0	1	0	0	0	0	1
0	1	1	1	0	0	0	0	0	0	1	0	0	0	0	1
0	1	0	1	0	0	1	0	0	0	1	0	0	0	0	1
0	0	0	1	0	0	1	0	0	0	1	0	0	0	0	0
0	0	1	0	0	0	0	0	1	0	1	0	0	0	1	1
0	0	0	0	1	0	0	0	1	0	1	0	0	0	1	0
0	0	0	1	0	0	0	0	0	0	0	0	0	0	0	1
0	1	1	1	0	0	0	0	0	0	0	0	0	0	0	1
0	1	1	1	0	0	0	0	0	0	0	0	0	0	0	1
0	0	1	0	0	0	0	0	1	0	0	0	0	0	1	1
0	0	0	0	1	0	0	0	1	0	0	0	0	0	1	1
0	0	0	1	0	0	0	0	0	0	0	0	0	0	0	1
0	1	1	1	0	0	0	0	0	0	0	0	0	0	0	1
0	1	1	1	0	0	0	0	0	0	0	0	0	0	0	1
0	0	1	0	0	0	0	0	1	0	0	0	0	0	1	1
0	0	0	0	1	0	0	0	1	0	0	0	0	0	1	1
0	0	0	1	0	0	0	0	0	0	0	0	0	0	0	1
0	1	1	1	0	0	0	0	0	0	0	0	0	0	0	0
0	1	1	1	0	0	0	0	0	0	0	0	0	0	0	1
0	0	1	0	0	0	0	0	1	0	0	0	0	0	1	1
0	0	0	0	1	0	0	0	1	0	0	0	0	0	1	0
0	0	0	1	0	0	0	0	0	0	0	0	0	0	0	1
0	1	1	1	0	0	0	0	0	0	0	0	0	0	0	1
0	1	1	1	0	0	0	0	0	0	0	0	0	0	0	1
0	0	1	0	0	0	0	0	1	0	0	0	0	0	1	1
0	0	0	0	1	0	0	0	1	0	0	0	0	0	1	1
0	0	0	1	0	0	0	0	0	0	0	0	0	0	0	1
0	1	1	1	0	0	0	0	0	0	0	0	0	0	0	1
0	0	0	1	0	0	0	0	1	0	0	0	0	0	0	0
0	0	1	0	0	0	0	0	1	0	0	0	0	0	1	1
0	0	0	0	1	0	0	0	1	0	0	0	0	0	1	1
0	0	0	1	0	0	0	0	0	0	0	0	0	0	0	1
0	1	1	1	0	0	0	0	0	0	0	0	0	0	0	1
0	1	1	1	0	0	0	0	0	0	0	0	0	0	0	1
0	0	1	0	0	0	0	0	1	0	0	0	0	0	1	1
0	0	0	0	1	0	0	0	1	0	0	0	0	0	1	1
0	0	0	1	0	1	0	0	0	0	0	0	0	0	0	0
0	1	1	1	0	1	0	0	0	0	0	0	0	0	0	1
0	0	0	1	0	1	0	0	1	0	0	0	0	0	0	0
0	0	1	0	0	1	0	0	1	0	0	0	0	0	1	1
0	0	0	0	1	1	0	0	1	0	0	0	0	0	1	0
0	0	0	1	0	0	0	0	0	0	0	0	0	0	0	0
0	1	1	1	0	0	0	0	0	0	0	0	0	0	0	0
0	0	0	1	0	0	0	0	1	0	0	0	0	0	0	0
0	0	1	0	0	0	0	0	1	0	0	0	0	0	1	0
0	0	0	0	1	0	0	0	1	0	0	0	0	0	1	0
0	0	0	1	0	1	0	0	0	0	0	0	0	0	0	0
0	1	1	1	0	1	0	0	0	0	0	0	0	0	0	0
0	0	0	1	0	1	0	0	1	0	0	0	0	0	0	0
0	0	1	0	0	1	0	0	1	0	0	0	0	0	1	0
0	0	0	0	1	1	0	0	1	0	0	0	0	0	1	0
0	0	0	1	0	0	0	0	0	0	0	0	0	0	0	1
0	1	1	1	0	0	0	0	0	0	0	0	0	0	0	1
0	1	1	1	0	0	0	0	0	0	0	0	0	0	0	1
0	0	1	0	0	0	0	0	1	0	0	0	0	0	1	1
0	0	0	0	1	0	0	0	1	0	0	0	0	0	1	0
0	0	0	1	0	1	0	0	0	0	0	0	0	0	0	0
0	1	1	1	0	1	0	0	0	0	0	0	0	0	0	1
0	0	0	1	0	1	0	0	1	0	0	0	0	0	0	0
0	0	1	0	0	1	0	0	1	0	0	0	0	0	1	1
0	0	0	0	1	1	0	0	1	0	0	0	0	0	1	0
0	0	0	1	0	0	0	0	0	0	0	0	0	0	0	1
0	1	1	1	0	0	0	0	0	0	0	0	0	0	0	1
0	1	0	1	0	0	1	0	0	0	0	0	0	0	0	1
0	0	0	1	0	0	1	0	0	0	0	0	0	0	0	1
0	0	1	0	0	0	0	0	1	0	0	0	0	0	1	1
0	0	0	0	1	0	0	0	1	0	0	0	0	0	1	1
0	0	0	1	0	1	0	0	0	1	0	0	1	0	0	0
0	1	1	1	0	1	0	0	0	1	0	0	1	0	0	0
0	1	0	1	0	1	1	0	0	1	0	0	1	0	0	0
0	0	0	1	0	1	1	0	0	1	0	0	1	0	0	0
0	0	1	0	0	1	0	0	1	1	0	0	1	0	1	0
0	0	0	0	1	1	0	0	1	1	0	0	1	0	1	1
0	0	0	1	0	0	0	0	0	0	0	0	0	0	0	1
0	1	1	1	0	0	0	0	0	0	0	0	0	0	0	1
0	0	0	1	0	0	0	0	1	0	0	0	0	0	0	1
0	0	1	0	0	0	0	0	1	0	0	0	0	0	1	1
0	0	0	0	1	0	0	0	1	0	0	0	0	0	1	1
0	0	0	1	0	0	0	0	0	0	0	0	0	0	0	1
0	1	1	1	0	0	0	0	0	0	0	0	0	0	0	1
0	0	0	1	0	0	0	0	1	0	0	0	0	0	0	0
0	0	1	0	0	0	0	0	1	0	0	0	0	0	1	1
0	0	0	0	1	0	0	0	1	0	0	0	0	0	1	1
0	0	0	1	0	0	0	0	0	0	0	0	1	0	0	1
0	1	1	1	0	0	0	0	0	0	0	0	1	0	0	1
0	0	0	1	0	0	0	0	1	0	0	0	1	0	0	0
0	0	1	0	0	0	0	0	1	0	0	0	1	0	1	1
0	0	0	0	1	0	0	0	1	0	0	0	1	0	1	1
0	0	0	1	0	0	0	0	0	0	0	0	0	0	0	1
0	1	1	1	0	0	0	0	0	0	0	0	0	0	0	1
0	0	0	1	0	0	0	0	1	0	0	0	0	0	0	1
0	0	1	0	0	0	0	0	1	0	0	0	0	0	1	1
0	0	0	0	1	0	0	0	1	0	0	0	0	0	1	1
0	0	0	1	0	0	0	0	0	0	0	0	0	0	0	1
0	1	1	1	0	0	0	0	0	0	0	0	0	0	0	1
0	1	1	1	0	0	0	0	0	0	0	0	0	0	0	1
0	0	1	0	0	0	0	0	1	0	0	0	0	0	1	1
0	0	0	0	1	0	0	0	1	0	0	0	0	0	1	0
0	0	0	1	0	0	0	0	0	0	0	0	0	0	0	1
0	1	1	1	0	0	0	0	0	0	0	0	0	0	0	1
0	0	0	1	0	0	0	0	1	0	0	0	0	0	0	1
0	0	1	0	0	0	0	0	1	0	0	0	0	0	1	1
0	0	0	0	1	0	0	0	1	0	0	0	0	0	1	0
0	0	0	1	0	0	0	0	0	0	0	0	0	0	0	1
0	1	1	1	0	0	0	0	0	0	0	0	0	0	0	1
0	1	0	1	0	0	1	0	0	0	0	0	0	0	0	1
0	0	0	1	0	0	1	0	0	0	0	0	0	0	0	1
0	0	1	0	0	0	0	0	1	0	0	0	0	0	1	0
0	0	0	0	1	0	0	0	1	0	0	0	0	0	1	0
0	0	0	1	0	0	0	0	0	0	0	0	0	0	0	0
0	1	1	1	0	0	0	0	0	0	0	0	0	0	0	0
0	0	0	1	0	0	0	0	1	0	0	0	0	0	0	1
0	0	1	0	0	0	0	0	1	0	0	0	0	0	1	1
0	0	0	0	1	0	0	0	1	0	0	0	0	0	1	0
0	0	0	1	0	0	0	0	0	0	0	0	0	0	0	1
0	1	1	1	0	0	0	0	0	0	0	0	0	0	0	1
0	1	1	1	0	0	0	0	0	0	0	0	0	0	0	1
0	0	1	0	0	0	0	0	1	0	0	0	0	0	1	1
0	0	0	0	1	0	0	0	1	0	0	0	0	0	1	1
0	0	0	1	0	0	0	0	0	1	0	0	0	0	0	0
0	1	1	1	0	0	0	0	0	1	0	0	0	0	0	1
0	1	0	1	0	0	1	0	0	1	0	0	0	0	0	1
0	0	0	1	0	0	1	0	0	1	0	0	0	0	0	0
0	0	1	0	0	0	0	0	1	1	0	0	0	0	1	1
0	0	0	0	1	0	0	0	1	1	0	0	0	0	1	0
0	0	0	1	0	0	0	0	0	0	0	0	0	0	0	0
0	1	1	1	0	0	0	0	0	0	0	0	0	0	0	1
0	0	0	1	0	0	0	0	1	0	0	0	0	0	0	0
0	0	1	0	0	0	0	0	1	0	0	0	0	0	1	1
0	0	0	0	1	0	0	0	1	0	0	0	0	0	1	1
0	0	0	1	0	1	0	0	0	0	0	0	0	0	0	1
0	1	1	1	0	1	0	0	0	0	0	0	0	0	0	1
0	1	1	1	0	1	0	0	0	0	0	0	0	0	0	1
0	0	1	0	0	1	0	0	1	0	0	0	0	0	1	0
0	0	0	0	1	1	0	0	1	0	0	0	0	0	1	0
0	0	0	1	0	0	0	0	0	1	0	0	0	0	0	1
0	1	1	1	0	0	0	0	0	1	0	0	0	0	0	1
0	1	0	1	0	0	1	0	0	1	0	0	0	0	0	0
0	0	0	1	0	0	1	0	0	1	0	0	0	0	0	0
0	0	1	0	0	0	0	0	1	1	0	0	0	0	1	1
0	0	0	0	1	0	0	0	1	1	0	0	0	0	1	0
0	0	0	1	0	0	0	0	0	1	0	0	0	0	0	1
0	1	1	1	0	0	0	0	0	1	0	0	0	0	0	1
0	1	0	1	0	0	1	0	0	1	0	0	0	0	0	1
0	0	0	1	0	0	1	0	0	1	0	0	0	0	0	1
0	0	1	0	0	0	0	0	1	1	0	0	0	0	1	1
0	0	0	0	1	0	0	0	1	1	0	0	0	0	1	0
0	0	0	1	0	0	0	0	0	0	0	1	0	0	0	0
0	1	1	1	0	0	0	0	0	0	0	1	0	0	0	0
0	0	0	1	0	0	0	0	1	0	0	1	0	0	0	0
0	0	1	0	0	0	0	0	1	0	0	1	0	0	1	0
0	0	0	0	1	0	0	0	1	0	0	1	0	0	1	0
0	0	0	1	0	0	0	0	0	0	0	0	0	0	0	1
0	1	1	1	0	0	0	0	0	0	0	0	0	0	0	1
0	1	1	1	0	0	0	0	0	0	0	0	0	0	0	1
0	0	1	0	0	0	0	0	1	0	0	0	0	0	1	1
0	0	0	0	1	0	0	0	1	0	0	0	0	0	1	0
0	0	0	1	0	0	0	0	0	0	0	0	1	0	0	1
0	1	1	1	0	0	0	0	0	0	0	0	1	0	0	1
0	1	1	1	0	0	0	0	0	0	0	0	1	0	0	1
0	0	1	0	0	0	0	0	1	0	0	0	1	0	1	1
0	0	0	0	1	0	0	0	1	0	0	0	1	0	1	0
0	0	0	1	0	0	0	0	0	0	1	0	0	0	0	1
0	1	1	1	0	0	0	0	0	0	1	0	0	0	0	1
0	0	0	1	0	0	0	0	1	0	1	0	0	0	0	0
0	0	1	0	0	0	0	0	1	0	1	0	0	0	1	1
0	0	0	0	1	0	0	0	1	0	1	0	0	0	1	0
0	0	0	1	0	0	0	0	0	0	0	0	0	0	0	1
0	1	1	1	0	0	0	0	0	0	0	0	0	0	0	1
0	0	0	1	0	0	0	0	1	0	0	0	0	0	0	1
0	0	1	0	0	0	0	0	1	0	0	0	0	0	1	1
0	0	0	0	1	0	0	0	1	0	0	0	0	0	1	0
0	0	0	1	0	1	0	0	0	0	0	0	0	0	0	1
0	1	1	1	0	1	0	0	0	0	0	0	0	0	0	1
0	1	1	1	0	1	0	0	0	0	0	0	0	0	0	1
0	0	1	0	0	1	0	0	1	0	0	0	0	0	1	0
0	0	0	0	1	1	0	0	1	0	0	0	0	0	1	0
0	0	0	1	0	0	0	0	0	0	0	0	0	0	0	1
0	1	1	1	0	0	0	0	0	0	0	0	0	0	0	1
0	0	0	1	0	0	0	0	1	0	0	0	0	0	0	1
0	0	1	0	0	0	0	0	1	0	0	0	0	0	1	1
0	0	0	0	1	0	0	0	1	0	0	0	0	0	1	1
0	0	0	1	0	0	0	0	0	0	0	1	0	0	0	1
0	1	1	1	0	0	0	0	0	0	0	1	0	0	0	1
0	0	0	1	0	0	0	0	1	0	0	1	0	0	0	1
0	0	1	0	0	0	0	0	1	0	0	1	0	0	1	1
0	0	0	0	1	0	0	0	1	0	0	1	0	0	1	1
0	0	0	1	0	0	0	0	0	0	0	0	0	0	0	0
0	1	1	1	0	0	0	0	0	0	0	0	0	0	0	1
0	1	1	1	0	0	0	0	0	0	0	0	0	0	0	1
0	0	1	0	0	0	0	0	1	0	0	0	0	0	1	0
0	0	0	0	1	0	0	0	1	0	0	0	0	0	1	0
0	0	0	1	0	0	0	0	0	0	0	0	0	0	0	1
0	1	1	1	0	0	0	0	0	0	0	0	0	0	0	1
0	1	1	1	0	0	0	0	0	0	0	0	0	0	0	1
0	0	1	0	0	0	0	0	1	0	0	0	0	0	1	1
0	0	0	0	1	0	0	0	1	0	0	0	0	0	1	0
0	0	0	1	0	1	0	0	0	0	1	0	0	0	0	0
0	1	1	1	0	1	0	0	0	0	1	0	0	0	0	1
0	0	0	1	0	1	0	0	1	0	1	0	0	0	0	0
0	1	1	1	0	1	0	0	0	0	1	0	0	0	0	1
0	1	0	1	0	1	1	0	0	0	1	0	0	0	0	0
0	0	0	1	0	1	1	0	0	0	1	0	0	0	0	0
0	0	1	0	0	1	0	0	1	0	1	0	0	0	1	1
0	0	0	0	1	1	0	0	1	0	1	0	0	0	1	0
0	0	0	1	0	1	0	0	0	0	0	0	0	0	0	1
0	1	1	1	0	1	0	0	0	0	0	0	0	0	0	1
0	1	1	1	0	1	0	0	0	0	0	0	0	0	0	1
0	0	1	0	0	1	0	0	1	0	0	0	0	0	1	1
0	0	0	0	1	1	0	0	1	0	0	0	0	0	1	1
0	0	0	1	0	0	0	0	0	0	0	0	0	0	0	1
0	1	1	1	0	0	0	0	0	0	0	0	0	0	0	1
0	1	1	1	0	0	0	0	0	0	0	0	0	0	0	1
0	0	1	0	0	0	0	0	1	0	0	0	0	0	1	1
0	0	0	0	1	0	0	0	1	0	0	0	0	0	1	1
0	0	0	1	0	0	0	0	0	0	0	0	0	0	0	1
0	1	1	1	0	0	0	0	0	0	0	0	0	0	0	1
0	1	0	1	0	0	1	0	0	0	0	0	0	0	0	0
0	0	0	1	0	0	1	0	0	0	0	0	0	0	0	0
0	0	1	0	0	0	0	0	1	0	0	0	0	0	1	0
0	0	0	0	1	0	0	0	1	0	0	0	0	0	1	0
0	0	0	1	0	0	0	0	0	0	0	0	0	0	0	1
0	1	1	1	0	0	0	0	0	0	0	0	0	0	0	1
0	0	0	1	0	0	0	0	1	0	0	0	0	0	0	1
0	0	1	0	0	0	0	0	1	0	0	0	0	0	1	1
0	0	0	0	1	0	0	0	1	0	0	0	0	0	1	0
0	0	0	1	0	0	0	0	0	0	0	0	1	0	0	1
0	1	1	1	0	0	0	0	0	0	0	0	1	0	0	1
0	1	1	1	0	0	0	0	0	0	0	0	1	0	0	1
0	0	1	0	0	0	0	0	1	0	0	0	1	0	1	1
0	0	0	0	1	0	0	0	1	0	0	0	1	0	1	0
0	0	0	1	0	0	0	0	0	0	0	0	0	0	0	1
0	1	1	1	0	0	0	0	0	0	0	0	0	0	0	1
0	1	1	1	0	0	0	0	0	0	0	0	0	0	0	1
0	0	1	0	0	0	0	0	1	0	0	0	0	0	1	0
0	0	0	0	1	0	0	0	1	0	0	0	0	0	1	0
0	0	0	1	0	0	0	0	0	0	0	0	0	0	0	1
0	1	1	1	0	0	0	0	0	0	0	0	0	0	0	1
0	0	0	1	0	0	0	0	1	0	0	0	0	0	0	1
0	0	1	0	0	0	0	0	1	0	0	0	0	0	1	1
0	0	0	0	1	0	0	0	1	0	0	0	0	0	1	1
0	0	0	1	0	0	0	0	0	0	0	1	1	0	0	0
0	1	1	1	0	0	0	0	0	0	0	1	1	0	0	1
0	0	0	1	0	0	0	0	1	0	0	1	1	0	0	0
0	0	1	0	0	0	0	0	1	0	0	1	1	0	1	0
0	0	0	0	1	0	0	0	1	0	0	1	1	0	1	0
0	0	0	1	0	0	0	0	0	0	0	0	0	0	0	1
0	1	1	1	0	0	0	0	0	0	0	0	0	0	0	1
0	1	1	1	0	0	0	0	0	0	0	0	0	0	0	1
0	0	1	0	0	0	0	0	1	0	0	0	0	0	1	1
0	0	0	0	1	0	0	0	1	0	0	0	0	0	1	0
0	0	0	1	0	0	0	0	0	0	0	1	0	0	0	1
0	1	1	1	0	0	0	0	0	0	0	1	0	0	0	0
0	0	1	0	0	0	0	0	1	0	0	1	0	0	1	0
0	0	0	0	1	0	0	0	1	0	0	1	0	0	1	1
0	0	0	1	0	0	0	0	0	0	0	0	0	0	0	1
0	1	1	1	0	0	0	0	0	0	0	0	0	0	0	1
0	0	0	1	0	0	0	0	1	0	0	0	0	0	0	1
0	0	1	0	0	0	0	0	1	0	0	0	0	0	1	1
0	0	0	0	1	0	0	0	1	0	0	0	0	0	1	1
0	0	0	1	0	0	0	0	0	0	0	1	0	0	0	1
0	1	1	1	0	0	0	0	0	0	0	1	0	0	0	1
0	1	0	1	0	0	1	0	0	0	0	1	0	0	0	1
0	0	0	1	0	0	1	0	0	0	0	1	0	0	0	1
0	0	1	0	0	0	0	0	1	0	0	1	0	0	1	1
0	0	0	0	1	0	0	0	1	0	0	1	0	0	1	1
0	0	0	1	0	0	0	0	0	0	0	0	0	0	0	1
0	1	1	1	0	0	0	0	0	0	0	0	0	0	0	1
0	0	0	1	0	0	0	0	1	0	0	0	0	0	0	1
0	0	1	0	0	0	0	0	1	0	0	0	0	0	1	1
0	0	0	0	1	0	0	0	1	0	0	0	0	0	1	1
0	0	0	1	0	0	0	0	0	0	0	0	0	0	0	1
0	1	1	1	0	0	0	0	0	0	0	0	0	0	0	1
0	0	0	1	0	0	0	0	1	0	0	0	0	0	0	1
0	0	1	0	0	0	0	0	1	0	0	0	0	0	1	1
0	0	0	0	1	0	0	0	1	0	0	0	0	0	1	1
0	0	0	1	0	0	0	0	0	0	0	0	0	0	0	1
0	1	1	1	0	0	0	0	0	0	0	0	0	0	0	1
0	0	0	1	0	0	0	0	1	0	0	0	0	0	0	1
0	0	1	0	0	0	0	0	1	0	0	0	0	0	1	1
0	0	0	0	1	0	0	0	1	0	0	0	0	0	1	0
0	0	0	1	0	0	0	0	0	0	1	0	1	0	0	1
0	1	1	1	0	0	0	0	0	0	1	0	1	0	0	1
0	1	0	1	0	0	1	0	0	0	1	0	1	0	0	0
0	0	0	1	0	0	1	0	0	0	1	0	1	0	0	1
0	0	1	0	0	0	0	0	1	0	1	0	1	0	1	1
0	0	0	0	1	0	0	0	1	0	1	0	1	0	1	0
0	0	0	1	0	0	0	0	0	0	0	0	0	0	0	0
0	1	1	1	0	0	0	0	0	0	0	0	0	0	0	1
0	0	0	1	0	0	0	0	1	0	0	0	0	0	0	1
0	0	1	0	0	0	0	0	1	0	0	0	0	0	1	1
0	0	0	0	1	0	0	0	1	0	0	0	0	0	1	0
0	0	0	1	0	1	0	0	0	0	0	0	0	0	0	1
0	1	1	1	0	1	0	0	0	0	0	0	0	0	0	1
0	0	0	1	0	1	0	0	1	0	0	0	0	0	0	0
0	0	1	0	0	1	0	0	1	0	0	0	0	0	1	0
0	0	0	0	1	1	0	0	1	0	0	0	0	0	1	0
0	0	0	1	0	0	0	0	0	0	0	0	0	0	0	1
0	1	1	1	0	0	0	0	0	0	0	0	0	0	0	1
0	1	1	1	0	0	0	0	0	0	0	0	0	0	0	1
0	0	1	0	0	0	0	0	1	0	0	0	0	0	1	1
0	0	0	0	1	0	0	0	1	0	0	0	0	0	1	0
0	0	1	1	0	1	0	0	0	0	0	0	1	1	0	1
1	0	0	0	0	1	0	1	1	0	0	0	1	0	0	1
0	0	1	1	0	0	0	0	0	0	0	0	0	1	0	1
0	1	1	0	0	0	0	0	1	0	0	0	0	0	0	0
1	1	0	0	0	0	0	0	1	0	0	0	0	0	0	1
1	0	0	0	0	0	0	1	1	0	0	0	0	0	0	1
0	0	0	0	0	0	0	0	1	0	0	0	0	0	1	1
0	0	1	1	0	0	0	0	0	0	0	0	0	1	0	1
0	0	0	1	0	0	0	0	0	0	0	0	0	0	0	1
1	0	0	0	0	0	0	1	1	0	0	0	0	0	0	1
0	0	1	1	0	0	0	0	0	0	0	0	0	1	0	1
0	1	1	0	0	0	0	0	1	0	0	0	0	0	0	0
1	1	0	0	0	0	0	0	1	0	0	0	0	0	0	1
1	0	0	0	0	0	0	1	1	0	0	0	0	0	0	1
0	0	0	0	0	0	0	0	1	0	0	0	0	0	1	0
0	0	1	1	0	1	0	0	0	0	0	1	0	1	0	1
0	1	1	0	0	1	0	0	1	0	0	1	0	0	0	1
1	1	0	0	0	1	0	0	1	0	0	1	0	0	0	0
1	0	0	0	0	1	0	1	1	0	0	1	0	0	0	0
0	0	0	0	0	1	0	0	1	0	0	1	0	0	1	0
0	0	1	1	0	0	0	0	0	0	0	0	0	1	0	1
1	0	0	0	0	0	0	1	1	0	0	0	0	0	0	0
0	0	1	1	0	1	0	0	0	0	0	0	0	1	0	1
0	1	1	0	0	1	0	0	1	0	0	0	0	0	0	0
1	1	0	0	0	1	0	0	1	0	0	0	0	0	0	0
1	0	0	0	0	1	0	1	1	0	0	0	0	0	0	1
0	0	0	0	0	1	0	0	1	0	0	0	0	0	1	0
0	0	1	1	0	0	0	0	0	0	0	0	0	1	0	1
0	0	0	1	0	0	0	0	0	0	0	0	0	0	0	1
1	0	0	0	0	0	0	1	1	0	0	0	0	0	0	0
0	0	1	1	0	0	0	0	0	0	0	0	0	1	0	1
1	0	0	0	0	0	0	1	1	0	0	0	0	0	0	1
0	0	1	1	0	0	0	0	0	0	0	0	0	1	0	0
0	0	0	1	0	0	0	0	0	0	0	0	0	0	0	1
1	0	0	0	0	0	0	1	1	0	0	0	0	0	0	1
0	0	1	1	0	1	0	0	0	0	0	0	0	1	0	0
1	0	0	0	0	1	0	1	1	0	0	0	0	0	0	0
0	0	1	1	0	1	0	0	0	0	0	0	0	1	0	0
1	0	0	0	0	1	0	1	1	0	0	0	0	0	0	1
0	0	1	1	0	0	0	0	0	0	0	0	0	1	0	0
0	1	1	0	0	0	0	0	1	0	0	0	0	0	0	1
1	1	0	0	0	0	0	0	1	0	0	0	0	0	0	0
1	0	0	0	0	0	0	1	1	0	0	0	0	0	0	0
0	0	0	0	0	0	0	0	1	0	0	0	0	0	1	0
0	0	1	1	0	0	0	0	0	0	0	0	0	1	0	1
0	0	0	1	0	0	0	0	0	0	0	0	0	0	0	1
1	0	0	0	0	0	0	1	1	0	0	0	0	0	0	1
0	0	0	1	1	0	0	0	0	0	0	0	0	0	0	1
0	1	0	1	1	0	0	0	0	0	0	0	0	0	0	1
0	0	0	1	0	0	0	0	0	0	0	0	0	1	0	1
1	0	0	0	0	0	0	0	1	0	0	0	0	1	0	0
1	0	0	0	0	0	0	1	1	0	0	0	0	0	0	0
0	1	0	0	0	0	0	0	1	0	0	0	0	0	1	1
0	0	0	1	1	0	0	0	0	0	0	0	0	0	0	0
1	0	0	0	0	0	0	0	1	0	0	0	0	1	0	0
1	0	0	0	0	0	0	1	1	0	0	0	0	0	0	0
0	1	0	0	0	0	0	0	1	0	0	0	0	0	1	1
0	0	0	1	1	0	0	0	0	0	0	0	0	0	0	0
0	1	0	1	1	0	0	0	0	0	0	0	0	0	0	1
0	0	0	1	0	0	0	0	0	0	0	0	0	1	0	0
1	0	0	0	0	0	0	0	1	0	0	0	0	1	0	0
1	0	0	0	0	0	0	1	1	0	0	0	0	0	0	0
0	1	0	0	0	0	0	0	1	0	0	0	0	0	1	1
0	0	0	1	1	0	0	0	0	0	0	0	1	0	0	1
1	0	0	0	0	0	0	0	1	0	0	0	1	1	0	1
1	0	0	0	0	0	0	1	1	0	0	0	1	0	0	0
0	1	0	0	0	0	0	0	1	0	0	0	1	0	1	1
0	0	0	1	1	1	0	0	0	0	0	0	0	0	0	1
1	0	0	0	0	1	0	0	1	0	0	0	0	1	0	1
1	0	0	0	0	1	0	1	1	0	0	0	0	0	0	0
0	1	0	0	0	1	0	0	1	0	0	0	0	0	1	1
0	1	0	1	0	0	0	0	0	0	1	0	0	0	0	1
0	0	0	1	1	0	0	0	0	0	1	0	0	0	0	0
1	0	0	0	0	0	0	0	1	0	1	0	0	1	0	1
1	0	0	0	0	0	0	1	1	0	1	0	0	0	0	1
0	1	0	0	0	0	0	0	1	0	1	0	0	0	1	1
0	0	0	1	1	0	0	0	0	0	0	0	0	0	0	1
0	1	0	1	1	0	0	0	0	0	0	0	0	0	0	1
0	0	0	1	0	0	0	0	0	0	0	0	0	1	0	1
1	0	0	0	0	0	0	0	1	0	0	0	0	1	0	0
1	0	0	0	0	0	0	1	1	0	0	0	0	0	0	0
0	1	0	0	0	0	0	0	1	0	0	0	0	0	1	1
0	0	0	1	1	0	0	0	0	0	0	0	0	0	0	1
0	1	0	1	1	0	0	0	0	0	0	0	0	0	0	1
0	0	0	1	0	0	0	0	0	0	0	0	0	1	0	0
1	0	0	0	0	0	0	0	1	0	0	0	0	1	0	0
1	0	0	0	0	0	0	1	1	0	0	0	0	0	0	0
0	1	0	0	0	0	0	0	1	0	0	0	0	0	1	1
0	1	0	1	0	0	0	0	0	0	0	0	0	0	0	1
0	0	0	1	1	0	0	0	0	0	0	0	0	0	0	1
1	0	0	0	0	0	0	0	1	0	0	0	0	1	0	0
1	0	0	0	0	0	0	1	1	0	0	0	0	0	0	0
0	1	0	0	0	0	0	0	1	0	0	0	0	0	1	1
0	0	0	1	1	0	0	0	0	0	0	0	0	0	0	0
0	1	0	1	1	0	0	0	0	0	0	0	0	0	0	1
0	0	0	1	0	0	0	0	0	0	0	0	0	1	0	0
1	0	0	0	0	0	0	0	1	0	0	0	0	1	0	0
1	0	0	0	0	0	0	1	1	0	0	0	0	0	0	0
0	1	0	0	0	0	0	0	1	0	0	0	0	0	1	1
0	0	0	1	1	1	0	0	0	0	0	0	0	0	0	0
1	0	0	0	0	1	0	0	1	0	0	0	0	1	0	0
1	0	0	0	0	1	0	1	1	0	0	0	0	0	0	0
0	1	0	0	0	1	0	0	1	0	0	0	0	0	1	1
0	0	0	1	1	0	0	0	0	0	0	0	0	0	0	1
1	0	0	0	0	0	0	0	1	0	0	0	0	1	0	1
1	0	0	0	0	0	0	1	1	0	0	0	0	0	0	1
0	1	0	0	0	0	0	0	1	0	0	0	0	0	1	1
0	1	0	1	0	0	0	0	0	0	0	1	0	0	0	1
0	0	0	1	1	0	0	0	0	0	0	1	0	0	0	1
1	0	0	0	0	0	0	0	1	0	0	1	0	1	0	0
1	0	0	0	0	0	0	1	1	0	0	1	0	0	0	0
0	1	0	0	0	0	0	0	1	0	0	1	0	0	1	1
0	0	0	1	1	0	0	0	0	0	0	0	0	0	0	0
1	0	0	0	0	0	0	0	1	0	0	0	0	1	0	0
1	0	0	0	0	0	0	1	1	0	0	0	0	0	0	0
0	1	0	0	0	0	0	0	1	0	0	0	0	0	1	1
0	0	0	1	1	0	0	0	0	0	0	0	1	0	0	1
1	0	0	0	0	0	0	0	1	0	0	0	1	1	0	0
1	0	0	0	0	0	0	1	1	0	0	0	1	0	0	0
0	1	0	0	0	0	0	0	1	0	0	0	1	0	1	0
0	0	0	1	1	0	0	0	0	0	0	0	0	0	0	0
1	0	0	0	0	0	0	0	1	0	0	0	0	1	0	1
1	0	0	0	0	0	0	1	1	0	0	0	0	0	0	1
0	1	0	0	0	0	0	0	1	0	0	0	0	0	1	1
0	0	0	1	1	0	0	0	0	0	0	0	0	0	0	1
0	1	0	1	1	0	0	0	0	0	0	0	0	0	0	0
0	0	0	1	0	0	0	0	0	0	0	0	0	1	0	0
1	0	0	0	0	0	0	0	1	0	0	0	0	1	0	0
1	0	0	0	0	0	0	1	1	0	0	0	0	0	0	0
0	1	0	0	0	0	0	0	1	0	0	0	0	0	1	1
0	0	0	1	1	1	0	0	0	0	0	0	0	0	0	1
0	1	0	1	1	1	0	0	0	0	0	0	0	0	0	1
0	0	0	1	0	1	0	0	0	0	0	0	0	1	0	1
1	0	0	0	0	1	0	0	1	0	0	0	0	1	0	1
1	0	0	0	0	1	0	1	1	0	0	0	0	0	0	1
0	1	0	0	0	1	0	0	1	0	0	0	0	0	1	1
0	1	0	1	0	0	0	0	0	1	0	0	0	0	0	1
0	0	0	1	1	0	0	0	0	1	0	0	0	0	0	0
1	0	0	0	0	0	0	0	1	1	0	0	0	1	0	0
1	0	0	0	0	0	0	1	1	1	0	0	0	0	0	0
0	1	0	0	0	0	0	0	1	1	0	0	0	0	1	1
0	0	0	1	1	0	0	0	0	0	0	0	1	0	0	0
1	0	0	0	0	0	0	0	1	0	0	0	1	1	0	0
1	0	0	0	0	0	0	1	1	0	0	0	1	0	0	0
0	1	0	0	0	0	0	0	1	0	0	0	1	0	1	1
0	0	0	1	1	0	0	0	0	1	0	0	0	0	0	1
0	1	0	1	1	0	0	0	0	1	0	0	0	0	0	1
0	0	0	1	0	0	0	0	0	1	0	0	0	1	0	0
1	0	0	0	0	0	0	0	1	1	0	0	0	1	0	1
1	0	0	0	0	0	0	1	1	1	0	0	0	0	0	0
0	1	0	0	0	0	0	0	1	1	0	0	0	0	1	1
0	0	0	1	1	0	0	0	0	1	0	0	0	0	0	0
1	0	0	0	0	0	0	0	1	1	0	0	0	1	0	0
1	0	0	0	0	0	0	1	1	1	0	0	0	0	0	1
0	1	0	0	0	0	0	0	1	1	0	0	0	0	1	1
0	1	0	1	0	0	0	0	0	0	0	0	0	0	0	1
0	0	0	1	1	0	0	0	0	0	0	0	0	0	0	1
1	0	0	0	0	0	0	0	1	0	0	0	0	1	0	0
1	0	0	0	0	0	0	1	1	0	0	0	0	0	0	0
0	1	0	0	0	0	0	0	1	0	0	0	0	0	1	0
0	0	0	1	1	0	0	0	0	0	0	0	0	0	0	1
1	0	0	0	0	0	0	0	1	0	0	0	0	1	0	0
1	0	0	0	0	0	0	1	1	0	0	0	0	0	0	0
0	1	0	0	0	0	0	0	1	0	0	0	0	0	1	1
0	0	0	1	1	1	0	0	0	0	0	0	0	0	0	1
1	0	0	0	0	1	0	0	1	0	0	0	0	1	0	0
1	0	0	0	0	1	0	1	1	0	0	0	0	0	0	1
0	1	0	0	0	1	0	0	1	0	0	0	0	0	1	1
0	1	0	1	0	0	0	0	0	0	0	0	0	0	0	1
0	0	0	1	1	0	0	0	0	0	0	0	0	0	0	1
1	0	0	0	0	0	0	0	1	0	0	0	0	1	0	0
1	0	0	0	0	0	0	1	1	0	0	0	0	0	0	0
0	1	0	0	0	0	0	0	1	0	0	0	0	0	1	1
0	0	0	1	1	0	0	0	0	0	0	0	0	0	0	1
1	0	0	0	0	0	0	0	1	0	0	0	0	1	0	0
1	0	0	0	0	0	0	1	1	0	0	0	0	0	0	0
0	1	0	0	0	0	0	0	1	0	0	0	0	0	1	1
0	1	0	1	0	0	0	0	0	0	0	0	1	0	0	1
0	0	0	1	1	0	0	0	0	0	0	0	1	0	0	0
0	1	0	1	1	0	0	0	0	0	0	0	1	0	0	1
0	0	0	1	0	0	0	0	0	0	0	0	1	1	0	0
1	0	0	0	0	0	0	0	1	0	0	0	1	1	0	0
1	0	0	0	0	0	0	1	1	0	0	0	1	0	0	0
0	1	0	0	0	0	0	0	1	0	0	0	1	0	1	1
0	0	0	1	1	1	0	0	0	0	0	0	0	0	0	1
0	1	0	1	1	1	0	0	0	0	0	0	0	0	0	1
0	0	0	1	0	1	0	0	0	0	0	0	0	1	0	1
1	0	0	0	0	1	0	0	1	0	0	0	0	1	0	0
1	0	0	0	0	1	0	1	1	0	0	0	0	0	0	1
0	1	0	0	0	1	0	0	1	0	0	0	0	0	1	0
0	0	0	1	1	0	0	0	0	0	0	0	0	0	0	0
1	0	0	0	0	0	0	0	1	0	0	0	0	1	0	0
1	0	0	0	0	0	0	1	1	0	0	0	0	0	0	0
0	1	0	0	0	0	0	0	1	0	0	0	0	0	1	1
0	0	0	1	1	1	0	0	0	0	0	0	1	0	0	1
1	0	0	0	0	1	0	0	1	0	0	0	1	1	0	1
1	0	0	0	0	1	0	1	1	0	0	0	1	0	0	1
0	1	0	0	0	1	0	0	1	0	0	0	1	0	1	1
0	0	0	1	1	0	0	0	0	0	0	0	0	0	0	0
0	1	0	1	1	0	0	0	0	0	0	0	0	0	0	1
1	0	0	0	0	0	0	0	1	0	0	0	0	1	0	0
1	0	0	0	0	0	0	1	1	0	0	0	0	0	0	0
0	0	0	1	1	0	0	0	0	0	1	0	0	0	0	0
0	1	0	1	1	0	0	0	0	0	1	0	0	0	0	0
0	0	0	1	0	0	0	0	0	0	1	0	0	1	0	0
1	0	0	0	0	0	0	0	1	0	1	0	0	1	0	1
1	0	0	0	0	0	0	1	1	0	1	0	0	0	0	1
0	1	0	0	0	0	0	0	1	0	1	0	0	0	1	1
0	1	0	1	0	0	0	0	0	0	0	0	1	0	0	1
0	0	0	1	1	0	0	0	0	0	0	0	1	0	0	1
1	0	0	0	0	0	0	0	1	0	0	0	1	1	0	0
1	0	0	0	0	0	0	1	1	0	0	0	1	0	0	0
0	1	0	0	0	0	0	0	1	0	0	0	1	0	1	1
0	0	0	1	1	1	0	0	0	0	1	0	0	0	0	0
0	1	0	1	1	1	0	0	0	0	1	0	0	0	0	1
0	0	0	1	0	1	0	0	0	0	1	0	0	1	0	0
1	0	0	0	0	1	0	0	1	0	1	0	0	1	0	0
1	0	0	0	0	1	0	1	1	0	1	0	0	0	0	0
0	1	0	0	0	1	0	0	1	0	1	0	0	0	1	1
0	1	0	1	0	0	0	0	0	0	0	0	0	0	0	1
0	0	0	1	1	0	0	0	0	0	0	0	0	0	0	0
1	0	0	0	0	0	0	0	1	0	0	0	0	1	0	1
1	0	0	0	0	0	0	1	1	0	0	0	0	0	0	1
0	1	0	0	0	0	0	0	1	0	0	0	0	0	1	1
0	0	0	1	1	0	0	0	0	0	0	0	0	0	0	1
0	1	0	1	1	0	0	0	0	0	0	0	0	0	0	1
0	0	0	1	0	0	0	0	0	0	0	0	0	1	0	1
1	0	0	0	0	0	0	0	1	0	0	0	0	1	0	1
1	0	0	0	0	0	0	1	1	0	0	0	0	0	0	1
0	1	0	0	0	0	0	0	1	0	0	0	0	0	1	1
0	0	0	1	1	0	0	0	0	0	0	0	0	0	0	1
0	1	0	1	1	0	0	0	0	0	0	0	0	0	0	1
0	0	0	1	0	0	0	0	0	0	0	0	0	1	0	1
1	0	0	0	0	0	0	0	1	0	0	0	0	1	0	0
1	0	0	0	0	0	0	1	1	0	0	0	0	0	0	0
0	1	0	0	0	0	0	0	1	0	0	0	0	0	1	1
0	1	0	1	0	0	0	0	0	0	0	1	0	0	0	1
0	0	0	1	1	0	0	0	0	0	0	1	0	0	0	0
1	0	0	0	0	0	0	0	1	0	0	1	0	1	0	0
1	0	0	0	0	0	0	1	1	0	0	1	0	0	0	0
0	1	0	0	0	0	0	0	1	0	0	1	0	0	1	1
0	0	0	1	1	0	0	0	0	0	0	0	1	0	0	1
0	0	0	1	0	0	0	0	0	0	0	0	1	1	0	1
1	0	0	0	0	0	0	0	1	0	0	0	1	1	0	0
1	0	0	0	0	0	0	1	1	0	0	0	1	0	0	0
0	1	0	0	0	0	0	0	1	0	0	0	1	0	1	1
0	1	0	1	0	0	0	0	0	0	0	0	0	0	0	1
0	0	0	1	1	0	0	0	0	0	0	0	0	0	0	0
1	0	0	0	0	0	0	0	1	0	0	0	0	1	0	0
1	0	0	0	0	0	0	1	1	0	0	0	0	0	0	0
0	1	0	0	0	0	0	0	1	0	0	0	0	0	1	0
0	0	0	1	1	0	0	0	0	0	0	0	0	0	0	1
0	1	0	1	1	0	0	0	0	0	0	0	0	0	0	1
0	0	0	1	0	0	0	0	0	0	0	0	0	1	0	0
1	0	0	0	0	0	0	0	1	0	0	0	0	1	0	0
1	0	0	0	0	0	0	1	1	0	0	0	0	0	0	0
0	1	0	0	0	0	0	0	1	0	0	0	0	0	1	1
0	1	0	1	0	0	0	0	0	0	0	0	0	0	0	1
0	0	0	1	1	0	0	0	0	0	0	0	0	0	0	1
1	0	0	0	0	0	0	0	1	0	0	0	0	1	0	1
1	0	0	0	0	0	0	1	1	0	0	0	0	0	0	1
0	1	0	0	0	0	0	0	1	0	0	0	0	0	1	1
0	0	0	1	1	0	0	0	0	0	0	1	0	0	0	0
1	0	0	0	0	0	0	0	1	0	0	1	0	1	0	0
1	0	0	0	0	0	0	1	1	0	0	1	0	0	0	0
0	1	0	0	0	0	0	0	1	0	0	1	0	0	1	1
0	0	0	1	1	0	0	0	0	0	0	0	0	0	0	1
0	1	0	1	1	0	0	0	0	0	0	0	0	0	0	1
0	0	0	1	0	0	0	0	0	0	0	0	0	1	0	1
1	0	0	0	0	0	0	0	1	0	0	0	0	1	0	1
1	0	0	0	0	0	0	1	1	0	0	0	0	0	0	1
0	1	0	0	0	0	0	0	1	0	0	0	0	0	1	1
0	1	0	1	0	0	0	0	0	0	0	0	0	0	0	1
0	0	0	1	1	0	0	0	0	0	0	0	0	0	0	1
1	0	0	0	0	0	0	0	1	0	0	0	0	1	0	1
1	0	0	0	0	0	0	1	1	0	0	0	0	0	0	1
0	1	0	0	0	0	0	0	1	0	0	0	0	0	1	1
0	0	0	1	1	0	0	0	0	0	0	0	0	0	0	0
1	0	0	0	0	0	0	0	1	0	0	0	0	1	0	0
1	0	0	0	0	0	0	1	1	0	0	0	0	0	0	0
0	1	0	0	0	0	0	0	1	0	0	0	0	0	1	0
0	0	0	1	1	0	0	0	0	0	0	0	1	0	0	0
1	0	0	0	0	0	0	0	1	0	0	0	1	1	0	1
1	0	0	0	0	0	0	1	1	0	0	0	1	0	0	1
0	1	0	0	0	0	0	0	1	0	0	0	1	0	1	1
0	0	0	1	1	0	0	0	0	0	0	0	0	0	0	1
0	1	0	1	1	0	0	0	0	0	0	0	0	0	0	0
0	0	0	1	0	0	0	0	0	0	0	0	0	1	0	1
1	0	0	0	0	0	0	0	1	0	0	0	0	1	0	0
1	0	0	0	0	0	0	1	1	0	0	0	0	0	0	0
0	1	0	0	0	0	0	0	1	0	0	0	0	0	1	1
0	1	0	1	0	0	0	0	0	0	0	0	0	0	0	1
0	0	0	1	1	0	0	0	0	0	0	0	0	0	0	1
1	0	0	0	0	0	0	0	1	0	0	0	0	1	0	0
1	0	0	0	0	0	0	1	1	0	0	0	0	0	0	0
0	1	0	0	0	0	0	0	1	0	0	0	0	0	1	1
0	1	0	1	0	0	0	0	0	0	0	0	0	0	0	1
0	0	0	1	1	0	0	0	0	0	0	0	0	0	0	1
1	0	0	0	0	0	0	0	1	0	0	0	0	1	0	0
1	0	0	0	0	0	0	1	1	0	0	0	0	0	0	0
0	1	0	0	0	0	0	0	1	0	0	0	0	0	1	0
0	1	0	1	0	0	0	0	0	0	0	0	0	0	0	1
0	0	0	1	1	0	0	0	0	0	0	0	0	0	0	0
1	0	0	0	0	0	0	0	1	0	0	0	0	1	0	0
1	0	0	0	0	0	0	1	1	0	0	0	0	0	0	0
0	1	0	0	0	0	0	0	1	0	0	0	0	0	1	1
0	0	0	1	1	0	0	0	0	0	0	0	0	0	0	1
1	0	0	0	0	0	0	0	1	0	0	0	0	1	0	0
1	0	0	0	0	0	0	1	1	0	0	0	0	0	0	0
0	1	0	0	0	0	0	0	1	0	0	0	0	0	1	1
0	0	0	1	1	1	0	0	0	0	0	0	0	0	0	1
1	0	0	0	0	1	0	0	1	0	0	0	0	1	0	0
1	0	0	0	0	1	0	1	1	0	0	0	0	0	0	0
0	1	0	0	0	1	0	0	1	0	0	0	0	0	1	0
0	1	0	1	0	0	0	0	0	0	0	0	0	0	0	1
0	0	0	1	1	0	0	0	0	0	0	0	0	0	0	0
1	0	0	0	0	0	0	0	1	0	0	0	0	1	0	0
1	0	0	0	0	0	0	1	1	0	0	0	0	0	0	0
0	1	0	0	0	0	0	0	1	0	0	0	0	0	1	1
0	0	0	1	1	1	0	0	0	0	0	0	0	0	0	1
0	1	0	1	1	1	0	0	0	0	0	0	0	0	0	1
0	0	0	1	0	1	0	0	0	0	0	0	0	1	0	1
1	0	0	0	0	1	0	0	1	0	0	0	0	1	0	0
1	0	0	0	0	1	0	1	1	0	0	0	0	0	0	0
0	0	0	1	1	0	0	0	0	0	0	0	0	0	0	1
0	1	0	1	1	0	0	0	0	0	0	0	0	0	0	1
0	0	0	1	0	0	0	0	0	0	0	0	0	1	0	1
1	0	0	0	0	0	0	0	1	0	0	0	0	1	0	0
1	0	0	0	0	0	0	1	1	0	0	0	0	0	0	0
0	1	0	0	0	0	0	0	1	0	0	0	0	0	1	1
0	0	0	1	1	0	0	0	0	0	0	0	0	0	0	1
1	0	0	0	0	0	0	0	1	0	0	0	0	1	0	1
1	0	0	0	0	0	0	1	1	0	0	0	0	0	0	1
0	1	0	0	0	0	0	0	1	0	0	0	0	0	1	0
0	1	0	1	0	0	0	0	0	0	0	0	0	0	0	1
0	0	0	1	1	0	0	0	0	0	0	0	0	0	0	0
1	0	0	0	0	0	0	0	1	0	0	0	0	1	0	0
1	0	0	0	0	0	0	1	1	0	0	0	0	0	0	0
0	1	0	0	0	0	0	0	1	0	0	0	0	0	1	1
0	0	0	1	1	0	0	0	0	1	0	0	0	0	0	1
1	0	0	0	0	0	0	0	1	1	0	0	0	1	0	0
1	0	0	0	0	0	0	1	1	1	0	0	0	0	0	0
0	1	0	0	0	0	0	0	1	1	0	0	0	0	1	0
0	0	0	1	1	0	0	0	0	0	0	0	1	0	0	0
1	0	0	0	0	0	0	0	1	0	0	0	1	1	0	1
1	0	0	0	0	0	0	1	1	0	0	0	1	0	0	0
0	1	0	0	0	0	0	0	1	0	0	0	1	0	1	1
0	1	0	1	0	0	0	0	0	0	0	0	0	0	0	1
0	0	0	1	1	0	0	0	0	0	0	0	0	0	0	1
1	0	0	0	0	0	0	0	1	0	0	0	0	1	0	1
1	0	0	0	0	0	0	1	1	0	0	0	0	0	0	1
0	1	0	0	0	0	0	0	1	0	0	0	0	0	1	1
0	0	0	1	1	0	0	0	0	0	0	0	0	0	0	1
0	1	0	1	1	0	0	0	0	0	0	0	0	0	0	1
0	0	0	1	0	0	0	0	0	0	0	0	0	1	0	1
1	0	0	0	0	0	0	0	1	0	0	0	0	1	0	0
1	0	0	0	0	0	0	1	1	0	0	0	0	0	0	0
0	1	0	0	0	0	0	0	1	0	0	0	0	0	1	1
0	0	0	1	1	0	0	0	0	0	0	0	0	0	0	1
1	0	0	0	0	0	0	0	1	0	0	0	0	1	0	0
1	0	0	0	0	0	0	1	1	0	0	0	0	0	0	0
0	1	0	0	0	0	0	0	1	0	0	0	0	0	1	1
0	0	0	1	1	0	0	0	0	0	0	0	0	0	0	1
0	1	0	1	1	0	0	0	0	0	0	0	0	0	0	1
0	0	0	1	0	0	0	0	0	0	0	0	0	1	0	0
1	0	0	0	0	0	0	0	1	0	0	0	0	1	0	1
1	0	0	0	0	0	0	1	1	0	0	0	0	0	0	1
0	1	0	0	0	0	0	0	1	0	0	0	0	0	1	1
0	0	0	1	1	0	0	0	0	0	0	0	0	0	0	1
1	0	0	0	0	0	0	0	1	0	0	0	0	1	0	1
1	0	0	0	0	0	0	1	1	0	0	0	0	0	0	0
0	1	0	0	0	0	0	0	1	0	0	0	0	0	1	1
0	1	0	1	0	0	0	0	0	0	0	0	0	0	0	1
0	0	0	1	1	0	0	0	0	0	0	0	0	0	0	1
1	0	0	0	0	0	0	0	1	0	0	0	0	1	0	1
1	0	0	0	0	0	0	1	1	0	0	0	0	0	0	1
0	1	0	0	0	0	0	0	1	0	0	0	0	0	1	1
0	0	0	1	1	0	0	0	0	0	0	0	0	0	0	1
0	1	0	1	1	0	0	0	0	0	0	0	0	0	0	1
0	0	0	1	0	0	0	0	0	0	0	0	0	1	0	0
1	0	0	0	0	0	0	0	1	0	0	0	0	1	0	1
1	0	0	0	0	0	0	1	1	0	0	0	0	0	0	0
0	1	0	0	0	0	0	0	1	0	0	0	0	0	1	1
0	0	0	1	1	0	0	0	0	0	0	0	0	0	0	0
1	0	0	0	0	0	0	0	1	0	0	0	0	1	0	0
1	0	0	0	0	0	0	1	1	0	0	0	0	0	0	0
0	1	0	0	0	0	0	0	1	0	0	0	0	0	1	1
0	0	0	1	1	1	0	0	0	1	0	1	0	0	0	0
1	0	0	0	0	1	0	0	1	1	0	1	0	1	0	0
1	0	0	0	0	1	0	1	1	1	0	1	0	0	0	0
0	1	0	0	0	1	0	0	1	1	0	1	0	0	1	1
0	1	0	1	0	0	0	0	0	0	0	1	0	0	0	1
0	0	0	1	1	0	0	0	0	0	0	1	0	0	0	0
1	0	0	0	0	0	0	0	1	0	0	1	0	1	0	0
1	0	0	0	0	0	0	1	1	0	0	1	0	0	0	0
0	1	0	0	0	0	0	0	1	0	0	1	0	0	1	0
0	0	0	1	1	0	0	0	0	1	0	0	0	0	0	1
1	0	0	0	0	0	0	0	1	1	0	0	0	1	0	0
1	0	0	0	0	0	0	1	1	1	0	0	0	0	0	0
0	1	0	0	0	0	0	0	1	1	0	0	0	0	1	1
0	0	0	1	1	0	0	0	0	0	0	0	0	0	0	0
1	0	0	0	0	0	0	0	1	0	0	0	0	1	0	0
1	0	0	0	0	0	0	1	1	0	0	0	0	0	0	0
0	1	0	0	0	0	0	0	1	0	0	0	0	0	1	1
0	0	0	1	1	0	0	0	0	0	0	0	1	0	0	0
0	1	0	1	1	0	0	0	0	0	0	0	1	0	0	1
0	0	0	1	0	0	0	0	0	0	0	0	1	1	0	0
1	0	0	0	0	0	0	0	1	0	0	0	1	1	0	0
1	0	0	0	0	0	0	1	1	0	0	0	1	0	0	0
0	1	0	0	0	0	0	0	1	0	0	0	1	0	1	1
0	0	0	1	1	0	0	0	0	0	0	0	0	0	0	1
1	0	0	0	0	0	0	0	1	0	0	0	0	1	0	1
1	0	0	0	0	0	0	1	1	0	0	0	0	0	0	1
0	1	0	0	0	0	0	0	1	0	0	0	0	0	1	1
0	0	0	1	1	1	0	0	0	0	0	0	0	0	0	1
0	1	0	1	1	1	0	0	0	0	0	0	0	0	0	1
0	0	0	1	0	1	0	0	0	0	0	0	0	1	0	1
1	0	0	0	0	1	0	0	1	0	0	0	0	1	0	1
1	0	0	0	0	1	0	1	1	0	0	0	0	0	0	0
0	1	0	0	0	1	0	0	1	0	0	0	0	0	1	1
0	1	0	1	0	0	0	0	0	0	0	0	0	0	0	1
0	0	0	1	1	0	0	0	0	0	0	0	0	0	0	1
1	0	0	0	0	0	0	0	1	0	0	0	0	1	0	0
1	0	0	0	0	0	0	1	1	0	0	0	0	0	0	0
0	1	0	0	0	0	0	0	1	0	0	0	0	0	1	1
0	1	0	1	0	1	0	0	0	0	0	0	0	0	0	1
0	0	0	1	1	1	0	0	0	0	0	0	0	0	0	1
1	0	0	0	0	1	0	0	1	0	0	0	0	1	0	0
1	0	0	0	0	1	0	1	1	0	0	0	0	0	0	0
0	1	0	0	0	1	0	0	1	0	0	0	0	0	1	1
0	0	0	1	1	1	0	0	0	0	0	0	0	0	0	0
0	1	0	1	1	1	0	0	0	0	0	0	0	0	0	0
0	0	0	1	0	1	0	0	0	0	0	0	0	1	0	0
1	0	0	0	0	1	0	0	1	0	0	0	0	1	0	0
1	0	0	0	0	1	0	1	1	0	0	0	0	0	0	0
0	1	0	0	0	1	0	0	1	0	0	0	0	0	1	0
0	0	0	1	1	0	0	0	0	0	0	0	0	0	0	1
0	1	0	1	1	0	0	0	0	0	0	0	0	0	0	1
0	0	0	1	0	0	0	0	0	0	0	0	0	1	0	1
1	0	0	0	0	0	0	0	1	0	0	0	0	1	0	0
1	0	0	0	0	0	0	1	1	0	0	0	0	0	0	0
0	1	0	0	0	0	0	0	1	0	0	0	0	0	1	1
0	0	0	1	1	0	0	0	0	1	0	0	0	0	0	0
1	0	0	0	0	0	0	0	1	1	0	0	0	1	0	0
1	0	0	0	0	0	0	1	1	1	0	0	0	0	0	0
0	1	0	0	0	0	0	0	1	1	0	0	0	0	1	0
0	0	0	1	1	1	0	0	0	1	0	0	0	0	0	0
0	1	0	1	1	1	0	0	0	1	0	0	0	0	0	0
0	0	0	1	0	1	0	0	0	1	0	0	0	1	0	0
1	0	0	0	0	1	0	0	1	1	0	0	0	1	0	0
0	1	0	0	0	1	0	0	1	1	0	0	0	0	1	0
0	0	0	1	1	1	0	0	0	0	0	0	1	0	0	0
1	0	0	0	0	1	0	0	1	0	0	0	1	1	0	1
1	0	0	0	0	1	0	1	1	0	0	0	1	0	0	0
0	1	0	0	0	1	0	0	1	0	0	0	1	0	1	1
0	1	0	1	1	0	0	0	1	0	0	0	0	0	0	1
0	1	1	0	0	0	0	0	1	0	0	0	0	0	1	1
1	0	0	0	1	0	0	1	1	0	0	0	0	0	0	0
0	1	0	0	1	0	0	0	0	0	0	0	0	0	1	1
0	1	0	1	1	0	0	0	1	0	0	0	0	0	0	1
0	1	1	0	0	0	0	0	1	0	0	0	0	0	1	1
1	0	0	0	1	0	0	1	1	0	0	0	0	0	0	0
0	0	0	1	0	0	0	0	0	0	0	0	0	0	0	1
0	1	0	1	1	0	0	0	1	0	0	0	0	0	0	1
0	1	1	0	0	0	0	0	1	0	0	0	0	0	1	1
1	0	0	0	1	0	0	1	1	0	0	0	0	0	0	0
0	1	0	0	0	0	0	0	1	0	0	0	0	0	0	0
0	1	0	1	1	0	0	0	1	0	0	0	0	0	0	0
0	1	1	0	0	0	0	0	1	0	0	0	0	0	1	1
1	0	0	0	1	0	0	1	1	0	0	0	0	0	0	1
0	1	0	0	1	0	0	0	0	0	0	0	0	0	1	1
0	0	0	1	0	1	0	0	0	0	0	0	1	0	0	0
0	1	0	1	1	1	0	0	1	0	0	0	1	0	0	1
0	1	1	0	0	1	0	0	1	0	0	0	1	0	1	1
1	0	0	0	1	1	0	1	1	0	0	0	1	0	0	0
0	1	0	0	0	1	0	0	1	0	0	0	1	0	0	1
0	1	0	1	1	0	0	0	1	1	0	0	0	0	0	1
0	1	1	0	0	0	0	0	1	1	0	0	0	0	1	1
1	0	0	0	1	0	0	1	1	1	0	0	0	0	0	1
0	1	0	1	1	0	0	0	1	0	0	0	0	0	0	0
0	1	1	0	0	0	0	0	1	0	0	0	0	0	1	1
1	0	0	0	1	0	0	1	1	0	0	0	0	0	0	0
0	0	0	1	0	0	0	0	0	1	0	1	0	0	0	1
0	1	0	1	1	0	0	0	1	1	0	1	0	0	0	1
0	1	1	0	0	0	0	0	1	1	0	1	0	0	1	1
1	0	0	0	1	0	0	1	1	1	0	1	0	0	0	0
0	1	0	0	0	0	0	0	1	1	0	1	0	0	0	1
0	0	0	1	0	0	0	0	0	0	0	0	0	0	0	1
0	1	0	1	1	0	0	0	1	0	0	0	0	0	0	1
0	1	1	0	0	0	0	0	1	0	0	0	0	0	1	1
1	0	0	0	1	0	0	1	1	0	0	0	0	0	0	0
0	1	0	0	0	0	0	0	1	0	0	0	0	0	0	1
0	1	0	1	1	0	0	0	1	0	0	0	0	0	0	1
0	1	1	0	0	0	0	0	1	0	0	0	0	0	1	1
1	0	0	0	1	0	0	1	1	0	0	0	0	0	0	0
0	1	0	1	1	0	0	0	1	0	0	0	0	0	0	1
0	1	1	0	0	0	0	0	1	0	0	0	0	0	1	1
1	0	0	0	1	0	0	1	1	0	0	0	0	0	0	1
0	1	0	1	1	0	0	0	1	0	0	0	0	0	0	1
0	1	1	0	0	0	0	0	1	0	0	0	0	0	1	1
1	0	0	0	1	0	0	1	1	0	0	0	0	0	0	1
0	1	0	1	1	0	0	0	1	0	0	1	0	0	0	0
0	1	1	0	0	0	0	0	1	0	0	1	0	0	1	0
1	0	0	0	1	0	0	1	1	0	0	1	0	0	0	0
0	1	0	0	1	0	0	0	0	0	0	1	0	0	1	0
0	0	0	1	0	1	0	0	0	0	0	0	0	0	0	1
0	1	0	1	1	1	0	0	1	0	0	0	0	0	0	0
0	1	1	0	0	1	0	0	1	0	0	0	0	0	1	0
1	0	0	0	1	1	0	1	1	0	0	0	0	0	0	0
0	1	0	0	0	1	0	0	1	0	0	0	0	0	0	0
0	0	0	1	0	1	0	0	0	1	0	0	0	0	0	0
0	1	0	1	1	1	0	0	1	1	0	0	0	0	0	1
0	1	1	0	0	1	0	0	1	1	0	0	0	0	1	1
1	0	0	0	1	1	0	1	1	1	0	0	0	0	0	1
0	1	0	0	0	1	0	0	1	1	0	0	0	0	0	1
0	1	0	1	1	0	0	0	1	0	0	0	0	0	0	1
0	1	1	0	0	0	0	0	1	0	0	0	0	0	1	1
1	0	0	0	1	0	0	1	1	0	0	0	0	0	0	0
0	1	0	0	1	0	0	0	0	0	0	0	0	0	1	0
0	1	0	1	1	0	0	0	1	0	0	0	0	0	0	1
0	1	1	0	0	0	0	0	1	0	0	0	0	0	1	1
1	0	0	0	1	0	0	1	1	0	0	0	0	0	0	0
0	1	0	0	1	0	0	0	0	0	0	0	0	0	1	0
0	0	0	1	0	0	0	0	0	0	0	1	0	0	0	0
0	1	0	1	1	0	0	0	1	0	0	1	0	0	0	0
0	1	1	0	0	0	0	0	1	0	0	1	0	0	1	0
1	0	0	0	1	0	0	1	1	0	0	1	0	0	0	0
0	1	0	0	0	0	0	0	1	0	0	1	0	0	0	0
0	1	0	1	1	0	0	0	1	0	0	0	0	0	0	1
0	1	1	0	0	0	0	0	1	0	0	0	0	0	1	1
1	0	0	0	1	0	0	1	1	0	0	0	0	0	0	0
0	1	0	0	1	0	0	0	0	0	0	0	0	0	1	0
0	0	0	1	0	0	0	0	0	1	0	0	0	0	0	1
0	1	0	1	1	0	0	0	1	1	0	0	0	0	0	0
0	1	1	0	0	0	0	0	1	1	0	0	0	0	1	1
1	0	0	0	1	0	0	1	1	1	0	0	0	0	0	0
0	1	0	0	0	0	0	0	1	1	0	0	0	0	0	0
0	0	0	1	0	0	0	0	0	0	0	0	0	0	0	1
0	1	0	1	1	0	0	0	1	0	0	0	0	0	0	1
0	1	1	0	0	0	0	0	1	0	0	0	0	0	1	1
1	0	0	0	1	0	0	1	1	0	0	0	0	0	0	0
0	1	0	0	0	0	0	0	1	0	0	0	0	0	0	1
0	0	0	1	0	1	0	0	0	0	1	0	0	0	0	0
0	1	0	1	1	1	0	0	1	0	1	0	0	0	0	1
0	1	1	0	0	1	0	0	1	0	1	0	0	0	1	0
1	0	0	0	1	1	0	1	1	0	1	0	0	0	0	0
0	1	0	0	0	1	0	0	1	0	1	0	0	0	0	1
0	0	0	1	0	0	0	0	0	0	0	0	0	0	0	1
0	1	0	1	1	0	0	0	1	0	0	0	0	0	0	1
0	1	1	0	0	0	0	0	1	0	0	0	0	0	1	1
1	0	0	0	1	0	0	1	1	0	0	0	0	0	0	1
0	1	0	0	0	0	0	0	1	0	0	0	0	0	0	1
0	0	0	1	0	0	0	0	0	0	0	0	0	0	0	1
0	1	0	1	1	0	0	0	1	0	0	0	0	0	0	1
0	1	1	0	0	0	0	0	1	0	0	0	0	0	1	1
1	0	0	0	1	0	0	1	1	0	0	0	0	0	0	1
0	1	0	0	0	0	0	0	1	0	0	0	0	0	0	1
0	0	0	1	0	0	0	0	0	0	0	0	0	0	0	0
0	1	0	1	1	0	0	0	1	0	0	0	0	0	0	1
0	1	1	0	0	0	0	0	1	0	0	0	0	0	1	0
1	0	0	0	1	0	0	1	1	0	0	0	0	0	0	0
0	1	0	0	0	0	0	0	1	0	0	0	0	0	0	1
0	0	0	1	0	0	0	0	0	0	0	0	1	0	0	0
0	1	0	1	1	0	0	0	1	0	0	0	1	0	0	1
0	1	1	0	0	0	0	0	1	0	0	0	1	0	1	1
1	0	0	0	1	0	0	1	1	0	0	0	1	0	0	0
0	1	0	0	0	0	0	0	1	0	0	0	1	0	0	0
0	1	0	1	1	0	0	0	1	0	1	0	0	0	0	0
0	1	1	0	0	0	0	0	1	0	1	0	0	0	1	0
1	0	0	0	1	0	0	1	1	0	1	0	0	0	0	0
0	1	0	1	1	1	0	0	1	1	0	0	0	0	0	1
0	1	1	0	0	1	0	0	1	1	0	0	0	0	1	1
1	0	0	0	1	1	0	1	1	1	0	0	0	0	0	1
0	0	0	1	0	0	0	0	0	0	0	0	1	0	0	0
0	1	0	1	1	0	0	0	1	0	0	0	1	0	0	0
0	1	1	0	0	0	0	0	1	0	0	0	1	0	1	0
1	0	0	0	1	0	0	1	1	0	0	0	1	0	0	0
0	1	0	0	0	0	0	0	1	0	0	0	1	0	0	0
0	1	0	1	1	0	0	0	1	0	0	0	0	0	0	1
0	1	1	0	0	0	0	0	1	0	0	0	0	0	1	1
1	0	0	0	1	0	0	1	1	0	0	0	0	0	0	0
0	1	0	0	1	0	0	0	0	0	0	0	0	0	1	1
0	1	0	1	1	1	0	0	1	0	0	0	0	0	0	1
0	1	1	0	0	1	0	0	1	0	0	0	0	0	1	0
1	0	0	0	1	1	0	1	1	0	0	0	0	0	0	1
0	1	0	0	1	1	0	0	0	0	0	0	0	0	1	1
0	1	0	1	1	1	0	0	1	0	0	0	0	0	0	1
0	1	1	0	0	1	0	0	1	0	0	0	0	0	1	1
1	0	0	0	1	1	0	1	1	0	0	0	0	0	0	1
0	1	0	1	1	0	0	0	1	0	0	0	0	0	0	1
0	1	1	0	0	0	0	0	1	0	0	0	0	0	1	0
1	0	0	0	1	0	0	1	1	0	0	0	0	0	0	0
0	1	0	1	1	0	0	0	1	0	0	0	0	0	0	0
0	1	1	0	0	0	0	0	1	0	0	0	0	0	1	1
1	0	0	0	1	0	0	1	1	0	0	0	0	0	0	0
0	1	0	0	1	0	0	0	0	0	0	0	0	0	1	1
0	0	0	1	0	0	0	0	0	0	0	0	0	0	0	1
0	1	0	1	1	0	0	0	1	0	0	0	0	0	0	1
0	1	1	0	0	0	0	0	1	0	0	0	0	0	1	0
1	0	0	0	1	0	0	1	1	0	0	0	0	0	0	0
[truncated: 654 more rows]
