# Supplementary material
Source: ML conference proceedings conference paper supplement (https://proceedings.neurips.cc/paper_files/paper/2022/hash/5afaa8b4dd18eb1eed055d2d821b58ae-Abstract.html)
Supplement: Supplementary file 1 [file 5afaa8b4dd18eb1eed055d2d821b58ae-Supplemental-Conference.zip › 6769_exploring_the_whole_rashomon_s-Supplementary Material/6769_code_repo/experiments/datasets/coupon/Restaurant(20-50).csv]

expiration_1d	CoffeeHouse_1~3	Restaurant20To50_4~8	Restaurant20To50_1~3	occupation_Office & Administrative Support	age_31	Restaurant20To50_gt8	income_$12500 - $24999	toCoupon_GEQ15min	occupation_Computer & Mathematical	time_10PM	CoffeeHouse_4~8	income_$50000 - $62499	passanger_Alone	destination_No Urgent Place	target
1	0	0	0	0	0	0	0	1	0	0	0	0	1	0	0
1	0	0	0	0	0	0	0	1	0	0	0	0	1	0	0
1	0	0	0	0	0	0	1	1	0	0	1	0	1	0	0
1	0	0	0	0	0	0	1	1	0	0	1	0	1	0	0
1	1	0	0	0	0	0	0	1	0	0	0	0	1	0	0
1	1	0	0	0	0	0	0	1	0	0	0	0	1	0	1
1	0	0	1	0	0	0	1	1	0	0	0	0	1	0	1
1	0	0	1	0	0	0	1	1	0	0	0	0	1	0	1
1	0	0	0	0	0	0	0	1	0	0	0	1	1	0	0
1	0	0	0	0	0	0	0	1	0	0	0	1	1	0	0
1	0	0	0	0	0	0	0	1	0	0	0	0	1	0	0
1	0	0	0	0	0	0	0	1	0	0	0	0	1	0	0
1	0	0	0	0	0	1	0	1	0	0	0	0	1	0	1
1	0	0	0	0	0	1	0	1	0	0	0	0	1	0	1
1	1	0	0	0	0	0	0	1	0	0	0	0	1	0	1
1	0	0	0	0	0	0	0	1	0	0	0	0	1	0	0
1	0	0	0	0	0	0	0	1	0	0	0	0	1	0	1
1	1	0	1	0	0	0	0	0	0	0	0	0	0	1	1
1	1	0	1	0	0	0	0	1	0	0	0	0	1	0	1
1	1	0	1	0	0	0	0	1	0	0	0	0	1	0	0
1	0	0	0	0	0	0	0	1	0	0	0	0	1	0	0
1	0	0	0	0	0	0	0	1	0	0	0	0	1	0	1
1	0	0	0	0	1	0	0	1	0	0	0	0	1	0	1
1	0	0	0	0	1	0	0	1	0	0	0	0	1	0	1
1	0	0	0	0	0	0	1	1	0	0	0	0	1	0	0
1	1	0	0	0	0	0	0	1	0	0	0	1	1	0	0
1	1	0	0	0	0	0	0	1	0	0	0	1	1	0	1
1	0	0	0	0	0	0	0	0	0	0	0	0	0	1	1
1	0	0	0	0	0	0	0	1	0	0	0	0	1	0	1
1	0	0	0	0	0	0	0	1	0	0	0	0	1	0	0
1	1	1	0	0	1	0	0	1	1	0	0	0	1	0	1
1	1	1	0	0	1	0	0	1	1	0	0	0	1	0	0
1	0	0	0	0	1	0	0	1	0	0	0	0	1	0	0
1	0	0	0	0	1	0	0	1	0	0	0	0	1	0	0
1	0	1	0	0	0	0	0	1	0	0	0	0	1	0	0
1	0	1	0	0	0	0	0	1	0	0	0	0	1	0	1
1	0	0	0	0	0	0	0	0	0	0	0	1	0	1	1
1	0	0	0	0	0	0	0	1	0	0	0	1	1	0	0
1	0	0	0	0	0	0	0	1	0	0	0	1	1	0	1
1	1	0	0	0	0	0	0	1	1	0	0	1	1	0	1
1	1	0	0	0	0	0	0	1	1	0	0	1	1	0	1
1	0	0	0	0	1	1	0	1	0	0	0	1	1	0	1
1	0	0	0	0	1	1	0	1	0	0	0	1	1	0	1
1	1	0	0	0	0	0	0	1	0	0	0	0	1	0	0
1	1	0	0	0	0	0	0	1	0	0	0	0	1	0	0
1	1	0	0	0	0	0	0	1	0	0	0	0	1	0	1
1	1	0	0	0	0	0	0	1	0	0	0	0	1	0	1
1	0	0	0	0	0	0	0	1	0	0	0	0	1	0	1
1	0	0	0	0	0	0	0	1	0	0	0	0	1	0	1
1	0	0	0	0	1	0	0	1	0	0	0	0	1	0	1
1	0	0	0	0	1	0	0	1	0	0	0	0	1	0	0
1	0	0	0	1	0	0	0	1	0	0	0	1	1	0	0
1	0	0	0	1	0	0	0	1	0	0	0	1	1	0	1
1	0	0	1	0	0	0	0	1	0	0	0	0	1	0	0
1	0	0	1	0	0	0	0	1	0	0	0	0	1	0	0
1	1	0	0	1	0	0	0	1	0	0	0	0	1	0	0
1	1	0	0	1	0	0	0	1	0	0	0	0	1	0	1
1	0	0	1	0	1	0	0	0	0	0	0	0	0	1	1
1	0	0	1	0	1	0	0	1	0	0	0	0	1	0	1
1	0	0	1	0	1	0	0	1	0	0	0	0	1	0	1
1	1	0	1	0	0	0	0	1	0	0	0	1	1	0	0
1	1	0	1	0	0	0	0	1	0	0	0	1	1	0	0
1	0	0	0	0	0	0	0	0	0	0	0	0	0	1	1
1	0	0	0	0	0	0	0	1	0	0	0	0	1	0	1
1	0	0	0	0	0	0	0	1	0	0	0	0	1	0	1
1	0	0	0	0	0	0	0	1	0	0	0	0	1	0	1
1	0	0	0	0	0	0	0	1	0	0	0	0	1	0	1
1	1	0	1	0	0	0	0	0	0	0	0	0	0	1	1
1	1	0	1	0	0	0	0	1	0	0	0	0	1	0	1
1	1	0	1	0	0	0	0	1	0	0	0	0	1	0	1
1	1	0	1	0	0	0	0	1	0	0	0	0	1	0	1
1	1	0	1	0	0	0	0	1	0	0	0	0	1	0	1
1	0	0	0	0	0	0	0	1	0	0	0	0	1	0	0
1	0	0	0	0	0	0	0	1	0	0	0	0	1	0	0
1	1	0	1	0	0	0	0	1	1	0	0	0	1	0	1
1	1	0	1	0	0	0	0	1	1	0	0	0	1	0	1
1	0	0	0	0	0	0	0	1	0	0	0	0	1	0	1
1	0	0	0	0	0	0	0	1	0	0	0	0	1	0	0
1	1	0	0	0	0	0	0	0	0	0	0	1	0	1	1
1	1	0	0	0	0	0	0	1	0	0	0	1	1	0	0
1	1	0	0	0	0	0	0	1	0	0	0	1	1	0	1
1	0	0	0	1	0	0	0	1	0	0	0	0	1	0	1
1	0	0	0	1	0	0	0	1	0	0	0	0	1	0	1
1	0	1	0	0	1	0	0	1	0	0	1	1	1	0	0
1	0	1	0	0	1	0	0	1	0	0	1	1	1	0	0
1	0	0	0	0	0	0	0	0	0	0	0	0	0	1	0
1	0	0	0	0	0	0	0	1	0	0	0	0	1	0	0
1	0	0	0	0	0	0	0	1	0	0	0	0	1	0	0
1	0	0	0	0	0	0	0	1	0	0	0	0	1	0	0
1	0	0	0	0	0	0	0	1	0	0	0	0	1	0	1
1	0	0	0	0	1	0	0	1	0	0	0	0	1	0	0
1	0	0	0	0	1	0	0	1	0	0	0	0	1	0	0
1	0	0	0	0	0	0	1	1	0	0	1	0	1	0	0
1	0	0	0	0	0	0	1	1	0	0	1	0	1	0	0
1	0	0	0	0	0	0	0	0	0	0	0	0	0	1	0
1	0	0	0	0	0	0	0	1	0	0	0	0	1	0	0
1	0	0	0	0	0	0	0	1	0	0	0	0	1	0	0
1	1	0	1	1	1	0	0	0	0	0	0	0	0	1	1
1	1	0	1	1	1	0	0	1	0	0	0	0	1	0	0
1	1	0	1	1	1	0	0	1	0	0	0	0	1	0	1
1	1	0	0	0	0	0	0	1	0	0	0	0	1	0	1
1	1	0	0	0	0	0	0	1	0	0	0	0	1	0	0
1	0	0	0	0	0	0	0	1	0	0	0	0	1	0	0
1	0	0	0	0	0	0	0	1	0	0	0	0	1	0	0
1	1	0	0	0	0	0	0	1	0	0	0	0	1	0	0
1	1	0	0	0	0	0	0	1	0	0	0	0	1	0	0
1	0	0	0	0	1	0	0	0	1	0	0	0	0	1	1
1	0	0	0	0	1	0	0	1	1	0	0	0	1	0	0
1	0	0	0	0	1	0	0	1	1	0	0	0	1	0	1
1	0	1	0	0	0	0	0	1	1	0	0	0	1	0	1
1	0	1	0	0	0	0	0	1	1	0	0	0	1	0	1
1	1	0	1	0	0	0	0	1	0	0	0	0	1	0	1
1	1	0	1	0	0	0	0	1	0	0	0	0	1	0	1
1	0	0	0	0	0	0	1	1	0	0	1	0	1	0	0
1	0	0	0	0	0	0	1	1	0	0	1	0	1	0	0
1	0	0	0	0	0	0	0	1	0	0	0	0	1	0	0
1	0	0	0	0	0	0	0	1	0	0	0	0	1	0	0
1	0	0	0	0	0	0	0	0	0	0	1	1	0	1	1
1	0	0	0	0	0	0	0	1	0	0	1	1	1	0	0
1	0	0	0	0	0	0	0	1	0	0	1	1	1	0	1
1	1	0	0	0	0	0	0	0	0	0	0	0	0	1	0
1	1	0	0	0	0	0	0	1	0	0	0	0	1	0	0
1	1	0	0	0	0	0	0	1	0	0	0	0	1	0	0
1	0	0	1	0	0	0	0	1	0	0	0	0	1	0	1
1	0	0	1	0	0	0	0	1	0	0	0	0	1	0	0
1	0	0	1	0	0	0	0	0	0	0	1	1	0	1	1
1	0	0	1	0	0	0	0	1	0	0	1	1	1	0	0
1	0	0	1	0	0	0	0	1	0	0	1	1	1	0	1
1	0	0	0	0	0	0	0	0	1	0	0	1	0	1	1
1	0	0	0	0	0	0	0	1	1	0	0	1	1	0	1
1	0	0	0	0	0	0	0	1	1	0	0	1	1	0	1
1	0	0	0	0	0	0	1	1	0	0	0	0	1	0	0
1	0	0	0	0	0	0	1	1	0	0	0	0	1	0	1
1	0	0	0	0	0	0	0	1	0	0	0	0	1	0	0
1	0	0	0	0	0	0	0	1	0	0	0	0	1	0	0
1	0	0	0	0	0	0	0	1	0	0	0	0	1	0	1
1	0	0	0	0	0	0	0	1	0	0	0	0	1	0	1
1	1	0	1	0	0	0	0	1	0	0	0	0	1	0	0
1	1	0	1	0	0	0	0	1	0	0	0	0	1	0	0
1	1	0	1	0	0	0	0	0	0	0	0	0	0	1	0
1	1	0	1	0	0	0	0	1	0	0	0	0	1	0	0
1	1	0	1	0	0	0	0	1	0	0	0	0	1	0	1
1	0	0	1	0	1	0	0	0	0	0	0	0	0	1	1
1	0	0	1	0	1	0	0	1	0	0	0	0	1	0	1
1	0	0	1	0	1	0	0	1	0	0	0	0	1	0	0
1	1	0	0	0	0	0	1	1	0	0	0	0	1	0	1
1	1	0	0	0	0	0	1	1	0	0	0	0	1	0	1
1	0	0	1	0	0	0	0	1	0	0	0	0	1	0	0
1	0	0	1	0	0	0	0	1	0	0	0	0	1	0	1
1	0	0	0	0	1	0	0	1	1	0	0	0	1	0	1
1	0	0	0	0	1	0	0	1	1	0	0	0	1	0	1
1	1	0	0	0	0	0	0	1	0	0	0	0	1	0	0
1	1	0	0	0	0	0	0	1	0	0	0	0	1	0	0
1	1	0	0	0	0	1	0	1	0	0	0	0	1	0	1
1	1	0	0	0	0	1	0	1	0	0	0	0	1	0	1
1	0	0	0	0	0	0	0	1	0	0	1	0	1	0	0
1	0	0	0	0	0	0	0	1	0	0	1	0	1	0	0
1	0	0	1	0	0	0	0	1	0	0	0	0	1	0	1
1	0	0	1	0	0	0	0	1	0	0	0	0	1	0	1
1	0	0	0	0	0	0	0	1	0	0	0	0	1	0	0
1	0	0	0	0	0	0	0	1	0	0	0	0	1	0	0
1	0	0	0	0	0	0	0	1	0	0	0	1	1	0	0
1	0	0	0	0	0	0	0	1	0	0	0	1	1	0	0
1	0	0	1	0	0	0	0	0	1	0	0	0	0	1	1
1	0	0	1	0	0	0	0	1	1	0	0	0	1	0	1
1	0	0	1	0	0	0	0	1	1	0	0	0	1	0	1
1	1	0	0	0	0	0	0	1	0	0	0	0	1	0	1
1	1	0	0	0	0	0	0	1	0	0	0	0	1	0	1
1	1	0	1	0	0	0	1	0	0	0	0	0	0	1	1
1	1	0	1	0	0	0	1	1	0	0	0	0	1	0	1
1	1	0	1	0	0	0	1	1	0	0	0	0	1	0	1
1	0	0	0	0	0	0	0	1	0	0	0	0	1	0	1
1	0	0	0	0	0	0	0	1	0	0	0	0	1	0	1
1	0	0	0	0	0	0	0	1	0	0	0	1	1	0	1
1	0	0	0	0	0	0	0	1	0	0	0	1	1	0	1
1	1	0	0	0	0	0	1	1	0	0	0	0	1	0	0
1	1	0	0	0	0	0	1	1	0	0	0	0	1	0	0
1	0	0	0	0	0	0	0	1	0	0	0	1	1	0	0
1	0	0	0	0	0	0	0	1	0	0	0	1	1	0	1
1	0	0	0	0	0	0	1	1	0	0	0	0	1	0	1
1	0	0	0	0	0	0	1	1	0	0	0	0	1	0	1
1	1	0	0	0	1	0	0	1	0	0	0	0	1	0	0
1	1	0	0	0	1	0	0	1	0	0	0	0	1	0	0
1	1	0	0	0	1	0	0	1	0	0	0	0	1	0	1
1	1	0	0	0	1	0	0	1	0	0	0	0	1	0	0
1	0	0	0	0	0	0	0	1	0	0	1	1	1	0	0
1	0	0	0	0	0	0	0	1	0	0	1	1	1	0	0
1	1	0	0	0	0	0	0	1	0	0	0	0	1	0	0
1	1	0	0	0	0	0	0	1	0	0	0	0	1	0	0
1	0	0	1	0	0	0	0	0	0	0	0	1	0	1	1
1	0	0	1	0	0	0	0	1	0	0	0	1	1	0	1
1	0	0	1	0	0	0	0	1	0	0	0	1	1	0	0
1	0	0	1	0	0	0	0	0	0	0	0	0	0	1	1
1	0	0	1	0	0	0	0	1	0	0	0	0	1	0	1
1	0	0	1	0	0	0	0	1	0	0	0	0	1	0	0
1	1	0	1	0	0	0	0	1	0	0	0	0	1	0	1
1	1	0	1	0	0	0	0	1	0	0	0	0	1	0	1
1	0	0	1	0	0	0	0	1	0	0	0	1	1	0	1
1	0	0	1	0	0	0	0	1	0	0	0	1	1	0	1
1	0	0	1	0	0	0	1	1	0	0	0	0	1	0	0
1	0	0	1	0	0	0	1	1	0	0	0	0	1	0	0
1	1	0	1	0	0	0	0	1	0	0	0	0	1	0	1
1	1	0	1	0	0	0	0	1	0	0	0	0	1	0	0
1	1	0	0	0	0	0	0	1	0	0	0	0	1	0	0
1	1	0	0	0	0	0	0	1	0	0	0	0	1	0	0
1	0	0	1	0	0	0	0	1	0	0	1	0	1	0	1
1	0	0	1	0	0	0	0	1	0	0	1	0	1	0	0
1	0	0	1	0	0	0	0	1	0	0	0	0	1	0	1
1	0	0	1	0	0	0	0	1	0	0	0	0	1	0	1
1	0	0	0	0	0	0	1	1	0	0	0	0	1	0	0
1	0	0	0	0	0	0	1	1	0	0	0	0	1	0	1
1	0	0	1	0	0	0	0	0	0	0	0	0	0	1	1
1	0	0	1	0	0	0	0	1	0	0	0	0	1	0	1
1	0	0	1	0	0	0	0	1	0	0	0	0	1	0	1
1	0	0	0	0	0	0	1	0	0	0	0	0	0	1	0
1	0	0	0	0	0	0	1	1	0	0	0	0	1	0	0
1	0	0	0	0	0	0	1	1	0	0	0	0	1	0	0
1	0	0	0	0	0	0	0	1	1	0	0	1	1	0	0
1	0	0	0	0	0	0	0	1	1	0	0	1	1	0	1
1	0	0	0	1	0	0	0	1	0	0	0	0	1	0	0
1	0	0	0	1	0	0	0	1	0	0	0	0	1	0	1
1	0	0	0	0	0	0	0	0	1	0	0	1	0	1	1
1	0	0	0	0	0	0	0	1	1	0	0	1	1	0	0
1	0	0	0	0	0	0	0	1	1	0	0	1	1	0	1
1	1	0	1	0	1	0	0	1	0	0	0	0	1	0	1
1	1	0	1	0	1	0	0	1	0	0	0	0	1	0	1
1	1	0	0	0	1	0	0	1	0	0	0	1	1	0	1
1	1	0	0	0	1	0	0	1	0	0	0	1	1	0	1
1	0	0	1	0	0	0	0	1	0	0	0	0	1	0	1
1	0	0	1	0	0	0	0	1	0	0	0	0	1	0	1
1	0	0	0	0	0	0	0	1	0	0	0	0	1	0	0
1	0	0	0	0	0	0	0	1	0	0	0	0	1	0	0
1	0	0	0	0	0	0	1	1	0	0	1	0	1	0	0
1	0	0	0	0	0	0	1	1	0	0	1	0	1	0	0
1	0	0	0	0	0	0	1	0	0	0	0	0	0	1	1
1	0	0	0	0	0	0	1	1	0	0	0	0	1	0	0
1	0	0	0	0	0	0	1	1	0	0	0	0	1	0	0
1	0	0	0	0	0	0	1	0	0	0	0	0	0	1	0
1	0	0	0	0	0	0	1	1	0	0	0	0	1	0	0
1	0	0	0	0	0	0	1	1	0	0	0	0	1	0	0
1	0	0	0	0	0	0	0	1	0	0	0	0	1	0	1
1	0	0	0	0	0	0	0	1	0	0	0	0	1	0	1
1	0	0	0	0	0	0	0	1	0	0	0	0	1	0	0
1	0	0	0	0	0	0	0	1	0	0	0	0	1	0	0
1	0	0	0	0	0	1	1	1	0	0	1	0	1	0	0
1	0	0	0	0	0	1	1	1	0	0	1	0	1	0	1
1	0	0	0	1	0	0	0	1	0	0	1	0	1	0	1
1	0	0	0	1	0	0	0	1	0	0	1	0	1	0	1
1	0	0	0	0	0	0	0	1	0	0	0	0	1	0	0
1	0	0	0	0	0	0	0	1	0	0	0	0	1	0	0
1	1	0	0	1	0	0	1	1	0	0	0	0	1	0	0
1	1	0	0	1	0	0	1	1	0	0	0	0	1	0	1
1	1	0	0	0	0	0	0	1	0	0	0	0	1	0	1
1	1	0	0	0	0	0	0	1	0	0	0	0	1	0	0
1	0	0	1	0	0	0	0	1	0	0	0	0	1	0	1
1	0	0	1	0	0	0	0	1	0	0	0	0	1	0	0
1	1	0	0	0	0	0	0	1	0	0	0	0	1	0	1
1	1	0	0	0	0	0	0	1	0	0	0	0	1	0	1
1	0	0	1	0	0	0	0	0	0	0	0	1	0	1	1
1	0	0	1	0	0	0	0	1	0	0	0	1	1	0	0
1	0	0	1	0	0	0	0	1	0	0	0	1	1	0	0
1	1	0	0	0	0	0	0	1	0	0	0	0	1	0	1
1	1	0	0	0	0	0	0	1	0	0	0	0	1	0	1
1	1	0	1	0	0	0	0	1	1	0	0	0	1	0	1
1	1	0	1	0	0	0	0	1	1	0	0	0	1	0	0
1	0	0	0	0	0	0	0	1	0	0	0	1	1	0	1
1	0	0	0	0	0	0	0	1	0	0	0	1	1	0	1
1	0	0	0	0	0	0	0	1	0	0	0	1	1	0	0
1	0	0	0	0	0	0	0	1	0	0	0	1	1	0	0
1	0	1	0	0	0	0	0	1	0	0	0	0	1	0	1
1	0	1	0	0	0	0	0	1	0	0	0	0	1	0	1
1	1	0	0	0	0	0	0	1	0	0	0	1	1	0	0
1	1	0	0	0	0	0	0	1	0	0	0	1	1	0	0
1	0	0	0	0	0	0	0	1	0	0	0	1	1	0	1
1	0	0	0	0	0	0	0	1	0	0	0	1	1	0	1
1	0	0	0	0	0	0	0	1	0	0	0	0	1	0	0
1	0	0	0	0	0	0	0	1	0	0	0	0	1	0	0
1	1	0	0	0	0	0	0	1	1	0	0	0	1	0	1
1	1	0	0	0	0	0	0	1	1	0	0	0	1	0	1
1	0	1	0	0	1	0	0	1	0	0	0	0	1	0	1
1	0	1	0	0	1	0	0	1	0	0	0	0	1	0	1
1	0	0	1	0	0	0	0	1	1	0	0	0	1	0	0
1	0	0	1	0	0	0	0	1	1	0	0	0	1	0	0
1	0	0	0	0	1	0	0	1	1	0	0	0	1	0	1
1	0	0	0	0	1	0	0	1	1	0	0	0	1	0	0
1	0	0	0	0	0	0	0	1	0	0	1	0	1	0	0
1	0	0	0	0	0	0	0	1	0	0	1	0	1	0	1
1	0	0	0	0	1	0	1	1	0	0	0	0	1	0	0
1	0	0	0	0	1	0	1	1	0	0	0	0	1	0	0
1	0	0	0	0	0	0	1	1	0	0	0	0	1	0	1
1	0	0	0	0	0	0	1	1	0	0	0	0	1	0	1
1	0	0	0	0	0	0	0	1	1	0	0	0	1	0	1
1	0	0	0	0	0	0	0	1	1	0	0	0	1	0	1
1	0	0	0	0	0	1	0	1	0	0	0	0	1	0	1
1	0	0	0	0	0	1	0	1	0	0	0	0	1	0	1
1	0	0	0	0	0	0	0	1	1	0	0	0	1	0	0
1	0	0	0	0	0	0	0	1	1	0	0	0	1	0	1
1	0	0	0	0	0	0	1	1	0	0	0	0	1	0	0
1	0	0	0	0	0	0	1	1	0	0	0	0	1	0	0
1	1	0	0	0	0	0	0	1	0	0	0	0	1	0	0
1	1	0	0	0	0	0	0	1	0	0	0	0	1	0	0
1	0	0	0	0	0	0	0	0	0	0	0	0	0	1	0
1	0	0	0	0	0	0	0	1	0	0	0	0	1	0	0
1	0	0	0	0	0	0	0	1	0	0	0	0	1	0	0
1	0	0	0	0	0	0	0	0	0	0	0	0	0	1	1
1	0	0	0	0	0	0	0	1	0	0	0	0	1	0	0
1	0	0	0	0	0	0	0	1	0	0	0	0	1	0	1
1	0	0	1	0	0	0	0	1	0	0	0	0	1	0	0
1	0	0	1	0	0	0	0	1	0	0	0	0	1	0	1
1	1	0	1	0	1	0	0	1	0	0	0	0	1	0	1
1	1	0	1	0	1	0	0	1	0	0	0	0	1	0	1
1	0	0	0	0	0	0	0	1	0	0	0	0	1	0	1
1	0	0	0	0	0	0	0	1	0	0	0	0	1	0	0
1	0	0	0	0	1	0	0	0	1	0	0	0	0	1	1
1	0	0	0	0	1	0	0	1	1	0	0	0	1	0	1
1	0	0	0	0	1	0	0	1	1	0	0	0	1	0	1
1	0	0	0	0	0	0	0	1	0	0	1	1	1	0	0
1	0	0	0	0	0	0	0	1	0	0	1	1	1	0	1
1	0	0	0	0	0	0	0	1	0	0	1	0	1	0	0
1	0	0	0	0	0	0	0	1	0	0	1	0	1	0	0
1	0	0	0	0	0	0	0	1	0	0	0	0	1	0	1
1	0	0	0	0	0	0	0	1	0	0	0	0	1	0	0
1	0	0	0	0	0	0	1	1	0	0	0	0	1	0	1
1	0	0	0	0	0	0	1	1	0	0	0	0	1	0	1
1	0	0	1	0	0	0	0	0	0	0	0	0	0	1	1
1	0	0	1	0	0	0	0	1	0	0	0	0	1	0	1
1	0	0	1	0	0	0	0	1	0	0	0	0	1	0	1
1	0	0	0	0	0	0	0	0	0	0	1	0	0	1	1
1	0	0	0	0	0	0	0	1	0	0	1	0	1	0	1
1	0	0	0	0	0	0	0	1	0	0	1	0	1	0	1
1	0	0	1	1	0	0	0	1	0	0	0	0	1	0	1
1	0	0	1	1	0	0	0	1	0	0	0	0	1	0	1
1	1	0	1	0	0	0	0	1	0	0	0	0	1	0	1
1	1	0	1	0	0	0	0	1	0	0	0	0	1	0	0
1	0	0	0	0	0	0	0	1	0	0	0	0	1	0	1
1	0	0	0	0	0	0	0	1	0	0	0	0	1	0	0
1	0	0	0	0	0	0	0	1	0	0	0	0	1	0	1
1	0	0	0	0	0	0	0	1	0	0	0	0	1	0	0
1	0	0	1	0	0	0	0	1	0	0	1	0	1	0	0
1	0	0	1	0	0	0	0	1	0	0	1	0	1	0	0
1	0	0	1	0	0	0	0	0	0	0	1	0	0	1	1
1	0	0	1	0	0	0	0	1	0	0	1	0	1	0	1
1	0	0	1	0	0	0	0	1	0	0	1	0	1	0	1
1	0	0	0	0	0	0	0	1	0	0	0	0	1	0	0
1	0	0	0	0	0	0	0	1	0	0	0	0	1	0	0
1	0	0	0	0	0	0	0	1	0	0	1	0	1	0	1
1	0	0	0	0	0	0	0	1	0	0	1	0	1	0	1
1	1	0	0	0	1	0	1	1	0	0	0	0	1	0	1
1	1	0	0	0	1	0	1	1	0	0	0	0	1	0	1
1	1	0	0	0	0	0	0	0	0	0	0	0	0	1	1
1	1	0	0	0	0	0	0	1	0	0	0	0	1	0	1
1	1	0	0	0	0	0	0	1	0	0	0	0	1	0	1
1	1	0	0	0	0	0	1	0	0	0	0	0	0	1	1
1	1	0	0	0	0	0	1	1	0	0	0	0	1	0	1
1	1	0	0	0	0	0	1	1	0	0	0	0	1	0	1
1	0	0	1	0	0	0	0	1	0	0	0	0	1	0	1
1	0	0	1	0	0	0	0	1	0	0	0	0	1	0	1
1	0	0	1	0	0	0	0	0	0	0	0	0	0	1	1
1	0	0	1	0	0	0	0	1	0	0	0	0	1	0	0
1	0	0	1	0	0	0	0	1	0	0	0	0	1	0	0
1	0	0	1	0	0	0	0	1	0	0	1	0	1	0	0
1	0	0	1	0	0	0	0	1	0	0	1	0	1	0	0
1	1	0	0	0	0	0	0	1	0	0	0	0	1	0	0
1	1	0	0	0	0	0	0	1	0	0	0	0	1	0	1
1	0	0	0	0	0	0	0	0	0	0	0	0	0	1	0
1	0	0	0	0	0	0	0	1	0	0	0	0	1	0	0
1	0	0	0	0	0	0	0	1	0	0	0	0	1	0	0
1	0	0	0	0	0	0	0	1	0	0	0	0	1	0	0
1	0	0	0	0	0	0	0	1	0	0	0	0	1	0	0
1	0	0	0	0	0	0	1	1	0	0	1	0	1	0	1
1	0	0	0	0	0	0	1	1	0	0	1	0	1	0	0
1	1	0	0	0	0	0	0	0	0	0	0	0	0	1	0
1	1	0	0	0	0	0	0	1	0	0	0	0	1	0	0
1	1	0	0	0	0	0	0	1	0	0	0	0	1	0	0
1	0	0	1	0	0	0	0	1	1	0	0	0	1	0	0
1	0	0	1	0	0	0	0	1	1	0	0	0	1	0	0
1	0	0	0	0	0	0	1	1	0	0	0	0	1	0	1
1	0	0	0	0	0	0	1	1	0	0	0	0	1	0	1
1	1	0	1	0	0	0	0	1	1	0	0	0	1	0	1
1	1	0	1	0	0	0	0	1	1	0	0	0	1	0	1
1	1	0	1	0	0	0	1	1	0	0	0	0	1	0	1
1	1	0	1	0	0	0	1	1	0	0	0	0	1	0	0
1	1	0	1	0	0	0	0	1	0	0	0	0	1	0	1
1	1	0	1	0	0	0	0	1	0	0	0	0	1	0	1
0	0	0	0	0	1	1	0	0	0	0	1	0	0	1	0
0	0	0	0	0	0	0	0	0	0	0	0	0	0	1	1
0	0	0	0	0	0	0	0	0	0	0	0	0	0	1	0
0	0	0	0	0	0	0	0	0	0	0	0	0	0	1	0
0	0	0	0	0	0	0	0	1	0	0	0	0	1	0	0
0	0	0	0	0	0	0	0	1	0	0	0	0	1	0	0
0	0	1	0	0	0	0	0	0	1	0	0	0	0	1	1
0	0	0	0	0	0	0	0	1	0	0	0	0	1	0	1
0	0	0	0	0	0	0	0	1	0	0	0	0	1	0	0
0	0	0	1	0	0	0	0	1	0	0	1	0	1	0	0
0	0	0	1	0	0	0	0	1	0	0	1	0	1	0	1
0	0	0	0	0	0	0	0	1	0	0	0	1	1	0	0
0	0	0	0	0	0	0	0	1	0	0	0	1	1	0	0
0	0	0	0	0	0	0	1	0	0	0	1	0	0	1	0
0	0	0	1	0	0	0	0	1	0	0	0	0	1	0	0
0	0	0	1	0	0	0	0	1	0	0	0	0	1	0	0
0	0	0	0	0	0	0	0	0	0	0	0	0	0	1	1
0	1	0	0	0	0	0	0	0	0	0	0	0	0	1	0
0	0	0	0	0	0	0	0	1	0	0	0	0	1	0	0
0	0	0	0	0	0	0	0	1	0	0	0	0	1	0	0
0	0	0	0	0	0	0	0	0	1	0	0	1	0	1	0
0	0	0	0	0	0	0	1	0	0	0	0	0	0	1	0
0	0	0	0	0	0	0	0	1	0	0	0	0	1	0	0
0	0	0	0	0	0	0	0	1	0	0	0	0	1	0	0
0	0	0	0	0	0	0	0	1	0	0	0	0	1	0	0
0	0	0	0	0	0	0	0	1	0	0	0	0	1	0	0
0	0	0	1	0	0	0	0	0	0	0	0	0	0	1	1
0	1	0	0	0	0	0	0	0	0	0	0	0	0	1	0
0	0	0	0	0	0	0	0	0	0	0	0	0	0	1	1
0	0	0	0	0	0	0	0	1	0	0	1	0	1	0	1
0	0	0	0	0	0	0	0	1	0	0	1	0	1	0	0
0	1	0	0	0	0	0	0	1	0	0	0	0	1	0	0
0	1	0	0	0	0	0	0	1	0	0	0	0	1	0	1
0	1	0	1	0	0	0	0	0	0	0	0	0	0	1	1
0	0	0	1	0	0	0	0	0	0	0	0	1	0	1	1
0	0	0	0	0	0	0	0	1	0	0	0	0	1	0	0
0	0	0	0	0	0	0	0	1	0	0	0	0	1	0	0
0	0	0	0	0	0	0	0	0	0	0	0	0	0	1	0
0	0	0	0	0	0	0	0	1	0	0	0	0	1	0	1
0	0	0	0	0	0	0	0	1	0	0	0	0	1	0	1
0	1	0	0	0	1	0	0	1	0	0	0	1	1	0	0
0	1	0	0	0	1	0	0	1	0	0	0	1	1	0	0
0	1	0	0	0	0	0	1	1	0	0	0	0	1	0	0
0	1	0	0	0	0	0	1	1	0	0	0	0	1	0	0
0	1	0	0	0	0	0	0	1	0	0	0	0	1	0	0
0	1	0	0	0	0	0	0	1	0	0	0	0	1	0	0
0	0	0	0	0	1	0	0	1	0	0	0	0	1	0	1
0	0	0	0	0	1	0	0	1	0	0	0	0	1	0	0
0	0	0	1	0	0	0	0	1	0	0	1	0	1	0	1
0	0	0	0	0	0	0	0	1	0	0	0	0	1	0	0
0	0	0	0	0	0	0	0	1	0	0	0	0	1	0	0
0	0	0	1	0	1	0	0	0	0	0	0	1	0	1	1
0	1	0	1	0	0	0	1	0	1	0	0	0	0	1	1
0	1	0	1	0	0	0	1	1	1	0	0	0	1	0	1
0	1	0	1	0	0	0	1	1	1	0	0	0	1	0	1
0	0	0	0	0	0	0	0	0	0	0	0	0	0	1	1
0	1	0	0	0	0	0	0	1	0	0	0	0	1	0	1
0	1	0	0	0	0	0	0	1	0	0	0	0	1	0	1
0	0	0	0	0	0	0	0	1	0	0	0	1	1	0	1
0	0	0	0	0	0	0	0	1	0	0	0	1	1	0	0
0	0	0	0	0	0	0	0	1	0	0	0	1	1	0	0
0	0	0	0	0	0	0	0	1	0	0	0	1	1	0	0
0	1	0	1	0	0	0	0	0	0	0	0	0	0	1	0
0	0	0	0	0	0	0	1	1	0	0	0	0	1	0	0
0	0	0	0	0	0	0	1	1	0	0	0	0	1	0	0
0	0	0	0	0	0	0	0	0	0	0	0	0	0	1	0
0	0	0	0	0	0	0	1	0	0	0	0	0	0	1	1
0	0	0	1	0	0	0	0	0	0	0	0	0	0	1	0
0	0	0	0	0	0	0	0	0	0	0	0	0	0	1	1
0	1	0	1	1	0	0	1	0	0	0	0	0	0	1	1
0	1	0	0	0	0	0	0	1	0	0	0	0	1	0	0
0	1	0	0	0	0	0	0	1	0	0	0	0	1	0	1
0	1	0	1	0	0	0	0	0	0	0	0	1	0	1	1
0	0	0	0	0	0	0	0	1	0	0	0	0	1	0	0
0	0	0	0	0	0	0	0	1	0	0	0	0	1	0	0
0	0	0	1	0	0	0	0	1	0	0	0	0	1	0	0
0	0	0	1	0	0	0	0	1	0	0	0	0	1	0	0
0	0	0	0	0	0	0	1	1	0	0	0	0	1	0	0
0	0	0	0	0	0	0	1	1	0	0	0	0	1	0	0
0	0	0	0	0	0	0	0	0	0	0	0	0	0	1	0
0	0	0	1	0	0	0	0	1	0	0	0	0	1	0	0
0	0	0	1	0	0	0	0	1	0	0	0	0	1	0	0
0	0	0	0	0	0	0	0	1	0	0	0	0	1	0	0
0	0	0	0	0	0	0	0	1	0	0	0	0	1	0	0
0	1	0	0	0	0	0	0	1	0	0	0	0	1	0	0
0	1	0	0	0	0	0	0	1	0	0	0	0	1	0	1
0	0	0	0	0	0	0	0	1	0	0	1	0	1	0	0
0	0	0	0	0	0	0	0	1	0	0	1	0	1	0	0
0	1	0	0	0	0	0	0	1	0	0	0	1	1	0	0
0	1	0	0	0	0	0	0	1	0	0	0	1	1	0	0
0	1	0	1	0	0	0	0	0	0	0	0	0	0	1	0
0	1	0	0	0	0	0	0	1	0	0	0	0	1	0	0
0	1	0	0	0	0	0	0	1	0	0	0	0	1	0	0
0	0	0	1	0	0	0	0	1	0	0	0	0	1	0	0
0	0	0	1	0	0	0	0	1	0	0	0	0	1	0	0
0	0	0	1	0	1	0	0	0	0	0	0	0	0	1	1
0	0	0	1	0	0	0	0	1	0	0	1	0	1	0	0
0	0	0	1	0	0	0	0	1	0	0	1	0	1	0	0
0	0	0	0	0	0	0	0	0	0	0	0	1	0	1	0
0	0	0	0	0	0	0	0	1	0	0	0	0	1	0	1
0	0	0	0	0	0	0	0	1	0	0	0	0	1	0	0
0	0	0	1	0	0	0	0	0	0	0	0	0	0	1	1
0	0	0	1	0	0	0	0	0	0	0	0	0	0	1	1
0	0	0	0	0	0	0	0	1	0	0	0	0	1	0	1
0	0	0	0	0	0	0	0	1	0	0	0	0	1	0	0
0	1	0	1	0	0	0	0	1	0	0	0	0	1	0	0
0	1	0	1	0	0	0	0	1	0	0	0	0	1	0	0
0	0	0	0	0	0	0	0	0	0	0	0	0	0	1	0
0	0	0	0	0	0	0	0	1	0	0	0	0	1	0	0
0	0	0	0	0	0	0	0	1	0	0	0	0	1	0	0
0	0	0	0	0	0	0	0	1	0	0	0	0	1	0	1
0	0	0	0	0	0	0	0	1	0	0	0	0	1	0	0
0	0	0	0	0	0	0	1	0	0	0	0	0	0	1	0
0	0	0	0	0	0	0	0	0	1	0	0	0	0	1	0
0	0	0	1	0	0	0	0	0	0	0	0	1	0	1	0
0	0	0	1	0	0	0	0	1	0	0	0	1	1	0	0
0	0	0	1	0	0	0	0	1	0	0	0	1	1	0	0
0	0	0	0	0	0	0	0	0	0	0	0	0	0	1	1
0	1	0	0	0	1	0	1	0	1	0	0	0	0	1	0
0	0	0	0	0	0	0	1	1	0	0	1	0	1	0	0
0	0	0	0	0	0	0	1	1	0	0	1	0	1	0	0
0	1	0	0	0	0	0	0	0	1	0	0	0	0	1	1
0	0	0	1	0	1	0	0	0	1	0	0	0	0	1	1
0	0	0	0	0	1	0	0	1	1	0	1	0	1	0	0
0	0	0	0	0	1	0	0	1	1	0	1	0	1	0	0
0	0	0	1	0	0	0	1	1	0	0	0	0	1	0	0
0	0	0	1	0	0	0	1	1	0	0	0	0	1	0	0
0	0	1	0	0	0	0	0	0	0	0	1	1	0	1	0
0	0	0	1	0	1	0	1	1	0	0	0	0	1	0	1
0	0	0	1	0	1	0	1	1	0	0	0	0	1	0	0
0	0	0	1	1	0	0	0	1	0	0	0	0	1	0	1
0	0	0	1	1	0	0	0	1	0	0	0	0	1	0	0
0	0	0	0	0	0	0	0	1	0	0	0	0	1	0	0
0	0	0	0	0	0	0	0	1	0	0	0	0	1	0	0
0	0	0	0	0	0	0	0	1	0	0	0	0	1	0	0
0	0	0	0	0	0	0	0	1	0	0	0	0	1	0	0
0	0	1	0	0	0	0	0	1	0	0	1	0	1	0	0
0	0	1	0	0	0	0	0	1	0	0	1	0	1	0	0
0	1	0	0	0	0	0	0	1	0	0	0	0	1	0	0
0	1	0	0	0	0	0	0	1	0	0	0	0	1	0	0
0	1	0	0	1	0	0	0	0	0	0	0	0	0	1	1
0	0	0	1	0	0	0	0	1	0	0	0	0	0	1	1
1	0	0	1	0	0	0	0	0	0	1	0	0	1	1	1
1	0	0	1	0	0	0	0	1	0	0	0	0	0	0	1
0	0	0	1	0	0	0	0	1	0	1	0	0	0	0	1
1	1	0	0	0	0	0	0	0	0	1	0	0	1	1	1
1	0	0	0	0	0	0	1	0	0	1	1	0	1	1	0
0	0	0	0	0	0	0	1	0	0	1	1	0	0	1	0
1	1	0	0	0	0	0	0	0	0	1	0	0	1	1	1
1	0	0	0	0	0	0	0	0	0	1	0	0	1	1	0
0	1	0	1	0	1	0	0	1	0	0	0	0	0	1	0
1	1	0	1	0	1	0	0	0	0	1	0	0	1	1	0
1	1	0	1	0	1	0	0	1	0	0	0	0	0	0	0
0	1	0	1	0	1	0	0	1	0	1	0	0	0	0	0
1	0	0	0	0	0	0	0	0	0	1	1	0	1	1	0
1	0	0	1	0	1	0	0	0	0	1	0	0	1	1	1
0	0	0	1	0	1	0	0	0	0	1	0	0	0	1	0
0	1	0	0	0	0	0	0	1	0	0	0	1	0	1	0
1	1	0	0	0	0	0	0	0	0	1	0	1	1	1	1
1	1	0	0	0	0	0	0	1	0	0	0	1	0	0	1
0	1	0	0	0	0	0	0	1	0	1	0	1	0	0	0
1	0	0	0	0	0	0	1	0	0	1	0	0	1	1	0
0	0	0	0	0	0	0	1	0	0	1	0	0	0	1	0
0	0	0	0	0	0	0	0	1	0	0	0	1	0	1	0
1	0	0	0	0	0	0	0	0	0	1	0	1	1	1	1
1	0	0	0	0	0	0	0	1	0	0	0	1	0	0	1
0	0	0	0	0	0	0	0	1	0	1	0	1	0	0	0
0	0	0	0	0	0	0	1	1	0	0	0	0	0	1	1
1	0	0	0	0	0	0	1	0	0	1	0	0	1	1	1
1	0	0	0	0	0	0	1	1	0	0	0	0	0	0	1
0	0	0	0	0	0	0	1	1	0	1	0	0	0	0	0
1	0	0	0	0	0	0	1	0	0	1	1	0	1	1	0
1	0	0	1	0	0	0	0	0	0	1	1	0	1	1	1
0	0	0	1	0	0	0	0	0	0	1	1	0	0	1	0
0	1	0	0	0	1	0	0	1	0	0	0	0	0	1	1
0	1	0	0	0	1	0	0	0	0	1	0	0	1	0	0
1	1	0	0	0	1	0	0	1	0	0	0	0	1	0	1
0	1	0	0	0	0	0	0	1	0	0	0	0	0	1	1
1	1	0	0	0	0	0	0	0	0	0	0	0	0	1	1
0	1	0	0	0	0	0	0	0	0	1	0	0	1	0	0
1	1	0	0	0	0	0	0	1	0	0	0	0	1	0	0
0	0	0	0	0	1	0	0	1	1	0	0	0	0	1	0
0	0	0	0	0	1	0	0	0	1	1	0	0	1	0	0
1	0	0	0	0	1	0	0	1	1	0	0	0	1	0	0
0	0	0	0	0	0	0	0	1	1	0	0	1	0	1	1
1	0	0	0	0	0	0	0	0	1	0	0	1	0	1	0
0	0	0	0	0	0	0	0	0	1	1	0	1	1	0	0
1	0	0	0	0	0	0	0	1	1	0	0	1	1	0	1
0	1	0	1	0	1	0	1	1	0	0	0	0	0	1	1
1	1	0	1	0	1	0	1	0	0	0	0	0	0	1	0
0	1	0	1	0	1	0	1	0	0	1	0	0	1	0	1
1	1	0	1	0	1	0	1	1	0	0	0	0	1	0	0
0	0	0	0	0	0	0	0	1	0	0	1	0	0	1	0
0	0	0	0	0	0	0	0	0	0	1	1	0	1	0	0
1	0	0	0	0	0	0	0	1	0	0	1	0	1	0	1
1	0	0	0	0	0	0	0	1	0	0	1	0	1	0	0
0	0	0	0	0	0	0	0	1	0	0	0	0	0	1	1
0	0	0	0	0	0	0	0	0	0	1	0	0	1	0	0
1	0	0	0	0	0	0	0	1	0	0	0	0	1	0	0
0	0	0	0	0	0	0	0	1	0	0	0	0	0	1	1
0	0	0	0	0	0	0	0	0	0	1	0	0	1	0	0
1	0	0	0	0	0	0	0	1	0	0	0	0	1	0	0
0	0	0	0	0	0	0	0	1	0	0	0	0	0	1	1
0	0	0	0	0	0	0	0	0	0	1	0	0	1	0	0
1	0	0	0	0	0	0	0	1	0	0	0	0	1	0	0
1	0	0	0	0	0	0	0	1	0	0	0	0	1	0	0
0	0	0	0	0	1	0	0	1	0	0	0	0	0	1	1
0	0	0	0	0	1	0	0	0	0	1	0	0	1	0	0
1	0	0	0	0	1	0	0	1	0	0	0	0	1	0	0
0	0	0	1	0	0	0	0	1	0	0	0	0	0	1	0
1	0	0	1	0	0	0	0	0	0	0	0	0	0	1	0
0	0	0	1	0	0	0	0	0	0	1	0	0	1	0	0
1	0	0	1	0	0	0	0	1	0	0	0	0	1	0	0
0	0	0	1	0	1	0	0	1	0	0	0	0	0	1	0
1	0	0	1	0	1	0	0	0	0	0	0	0	0	1	0
0	0	0	1	0	1	0	0	0	0	1	0	0	1	0	0
1	0	0	1	0	1	0	0	1	0	0	0	0	1	0	0
0	0	0	0	0	0	0	0	1	1	0	0	0	0	1	0
0	0	0	0	0	0	0	0	0	1	1	0	0	1	0	0
1	0	0	0	0	0	0	0	1	1	0	0	0	1	0	0
1	0	0	0	0	0	0	0	1	1	0	0	0	1	0	0
0	1	0	0	0	0	0	0	1	0	0	0	0	0	1	1
1	1	0	0	0	0	0	0	0	0	0	0	0	0	1	1
0	1	0	0	0	0	0	0	0	0	1	0	0	1	0	0
1	1	0	0	0	0	0	0	1	0	0	0	0	1	0	0
0	0	0	0	0	0	0	0	1	0	0	0	0	0	1	0
1	0	0	0	0	0	0	0	0	0	0	0	0	0	1	1
0	0	0	0	0	0	0	0	0	0	1	0	0	1	0	0
1	0	0	0	0	0	0	0	1	0	0	0	0	1	0	0
0	1	0	0	0	0	0	0	1	0	0	0	0	0	1	1
1	1	0	0	0	0	0	0	0	0	0	0	0	0	1	1
0	1	0	0	0	0	0	0	0	0	1	0	0	1	0	0
1	1	0	0	0	0	0	0	1	0	0	0	0	1	0	0
0	1	0	1	0	0	0	0	1	0	0	0	0	0	1	1
0	1	0	1	0	0	0	0	0	0	1	0	0	1	0	0
1	1	0	1	0	0	0	0	1	0	0	0	0	1	0	0
0	0	0	0	0	0	0	0	1	0	0	0	0	0	1	1
0	0	0	0	0	0	0	0	0	0	1	0	0	1	0	1
1	0	0	0	0	0	0	0	1	0	0	0	0	1	0	1
0	0	0	1	1	0	0	0	1	0	0	0	0	0	1	1
0	0	0	1	1	0	0	0	0	0	1	0	0	1	0	0
1	0	0	1	1	0	0	0	1	0	0	0	0	1	0	1
1	0	0	1	1	0	0	0	1	0	0	0	0	1	0	1
0	0	0	0	0	0	0	0	1	0	0	0	0	0	1	1
1	0	0	0	0	0	0	0	0	0	0	0	0	0	1	0
0	0	0	0	0	0	0	0	0	0	1	0	0	1	0	0
1	0	0	0	0	0	0	0	1	0	0	0	0	1	0	1
0	1	0	0	0	0	0	0	1	0	0	0	0	0	1	0
0	1	0	0	0	0	0	0	0	0	1	0	0	1	0	1
1	1	0	0	0	0	0	0	1	0	0	0	0	1	0	1
0	1	0	1	0	0	0	0	1	0	0	0	0	0	1	0
1	1	0	1	0	0	0	0	0	0	0	0	0	0	1	1
0	1	0	1	0	0	0	0	0	0	1	0	0	1	0	0
1	1	0	1	0	0	0	0	1	0	0	0	0	1	0	0
0	0	0	0	0	0	0	0	1	1	0	0	0	0	1	1
0	0	0	0	0	0	0	0	0	1	1	0	0	1	0	0
1	0	0	0	0	0	0	0	1	1	0	0	0	1	0	1
1	0	0	0	0	0	0	0	1	1	0	0	0	1	0	0
0	0	0	0	0	0	0	0	1	0	0	1	1	0	1	1
1	0	0	0	0	0	0	0	0	0	0	1	1	0	1	0
0	0	0	0	0	0	0	0	0	0	1	1	1	1	0	0
1	0	0	0	0	0	0	0	1	0	0	1	1	1	0	0
0	0	0	0	0	1	0	0	1	0	0	0	1	0	1	1
1	0	0	0	0	1	0	0	0	0	0	0	1	0	1	1
0	0	0	0	0	1	0	0	0	0	1	0	1	1	0	1
1	0	0	0	0	1	0	0	1	0	0	0	1	1	0	1
0	0	0	0	0	0	0	0	1	0	0	0	0	0	1	0
0	0	0	0	0	0	0	0	0	0	1	0	0	1	0	0
1	0	0	0	0	0	0	0	1	0	0	0	0	1	0	0
1	0	0	0	0	0	0	0	1	0	0	0	0	1	0	0
0	1	0	0	0	0	0	0	1	0	0	0	0	0	1	1
1	1	0	0	0	0	0	0	0	0	0	0	0	0	1	1
0	1	0	0	0	0	0	0	0	0	1	0	0	1	0	1
1	1	0	0	0	0	0	0	1	0	0	0	0	1	0	0
0	0	0	0	0	0	0	1	1	0	0	0	0	0	1	1
1	0	0	0	0	0	0	1	0	0	0	0	0	0	1	0
0	0	0	0	0	0	0	1	0	0	1	0	0	1	0	1
1	0	0	0	0	0	0	1	1	0	0	0	0	1	0	1
1	0	0	0	0	0	0	1	1	0	0	0	0	1	0	1
1	0	0	0	0	0	0	0	0	0	0	0	1	0	1	0
0	1	0	0	0	0	0	0	1	0	0	0	0	0	1	0
0	1	0	0	0	0	0	0	0	0	1	0	0	1	0	0
1	1	0	0	0	0	0	0	1	0	0	0	0	1	0	0
0	0	0	0	0	0	0	0	1	1	0	0	1	0	1	0
0	0	0	0	0	0	0	0	0	1	1	0	1	1	0	0
1	0	0	0	0	0	0	0	1	1	0	0	1	1	0	1
0	1	1	0	0	0	0	1	1	1	0	0	0	0	1	1
1	1	1	0	0	0	0	1	0	1	0	0	0	0	1	1
0	1	1	0	0	0	0	1	0	1	1	0	0	1	0	1
1	1	1	0	0	0	0	1	1	1	0	0	0	1	0	1
0	1	0	1	0	0	0	0	1	0	0	0	1	0	1	1
0	1	0	1	0	0	0	0	0	0	1	0	1	1	0	0
1	1	0	1	0	0	0	0	1	0	0	0	1	1	0	1
0	0	0	0	0	0	0	0	1	0	0	0	0	0	1	0
0	0	0	0	0	0	0	0	0	0	1	0	0	1	0	0
1	0	0	0	0	0	0	0	1	0	0	0	0	1	0	0
0	0	0	0	0	0	0	0	1	0	0	0	1	0	1	1
0	0	0	0	0	0	0	0	0	0	1	0	1	1	0	1
1	0	0	0	0	0	0	0	1	0	0	0	1	1	0	1
1	0	0	0	0	0	0	0	1	0	0	0	1	1	0	1
0	0	0	1	0	0	0	0	1	0	0	0	1	0	1	0
0	0	0	1	0	0	0	0	0	0	1	0	1	1	0	0
1	0	0	1	0	0	0	0	1	0	0	0	1	1	0	1
0	0	0	0	0	1	0	0	1	0	0	1	0	0	1	0
0	0	0	0	0	1	0	0	0	0	1	1	0	1	0	0
1	0	0	0	0	1	0	0	1	0	0	1	0	1	0	0
1	0	0	0	0	1	0	0	1	0	0	1	0	1	0	0
0	0	0	1	0	0	0	0	1	0	0	0	1	0	1	1
0	0	0	1	0	0	0	0	0	0	1	0	1	1	0	0
1	0	0	1	0	0	0	0	1	0	0	0	1	1	0	0
0	1	0	0	0	0	0	0	1	0	0	0	0	0	1	0
0	1	0	0	0	0	0	0	0	0	1	0	0	1	0	0
1	1	0	0	0	0	0	0	1	0	0	0	0	1	0	0
0	0	0	0	0	0	1	0	1	0	0	0	0	0	1	0
0	0	0	0	0	0	1	0	0	0	1	0	0	1	0	0
1	0	0	0	0	0	1	0	1	0	0	0	0	1	0	1
1	0	0	0	0	0	1	0	1	0	0	0	0	1	0	1
0	1	0	1	0	0	0	0	1	0	0	0	0	0	1	1
0	1	0	1	0	0	0	0	0	0	1	0	0	1	0	1
1	1	0	1	0	0	0	0	1	0	0	0	0	1	0	1
0	0	0	0	0	0	0	0	1	0	0	1	0	0	1	1
0	0	0	0	0	0	0	0	0	0	1	1	0	1	0	0
1	0	0	0	0	0	0	0	1	0	0	1	0	1	0	0
1	0	0	0	0	0	0	0	1	0	0	1	0	1	0	0
0	0	0	0	0	1	0	0	1	1	0	0	0	0	1	1
0	0	0	0	0	1	0	0	0	1	1	0	0	1	0	0
1	0	0	0	0	1	0	0	1	1	0	0	0	1	0	0
0	0	0	1	1	0	0	0	1	0	0	1	0	0	1	1
0	0	0	1	1	0	0	0	0	0	1	1	0	1	0	1
1	0	0	1	1	0	0	0	1	0	0	1	0	1	0	1
1	0	0	1	1	0	0	0	1	0	0	1	0	1	0	1
0	0	0	0	0	0	0	0	1	1	0	0	0	0	1	0
1	0	0	0	0	0	0	0	0	1	0	0	0	0	1	1
0	0	0	0	0	0	0	0	0	1	1	0	0	1	0	0
1	0	0	0	0	0	0	0	1	1	0	0	0	1	0	1
0	0	0	1	0	0	0	0	1	0	0	0	1	0	1	1
0	0	0	1	0	0	0	0	0	0	1	0	1	1	0	1
1	0	0	1	0	0	0	0	1	0	0	0	1	1	0	1
0	0	0	0	0	0	1	0	1	0	0	0	0	0	1	1
0	0	0	0	0	0	1	0	0	0	1	0	0	1	0	1
1	0	0	0	0	0	1	0	1	0	0	0	0	1	0	1
1	0	0	0	0	0	1	0	1	0	0	0	0	1	0	1
0	0	1	0	0	1	0	0	1	1	0	1	0	0	1	0
1	0	1	0	0	1	0	0	0	1	0	1	0	0	1	0
0	0	1	0	0	1	0	0	0	1	1	1	0	1	0	0
1	0	1	0	0	1	0	0	1	1	0	1	0	1	0	0
0	0	0	1	0	0	0	0	1	0	0	0	0	0	1	0
1	0	0	1	0	0	0	0	0	0	0	0	0	0	1	0
0	0	0	1	0	0	0	0	0	0	1	0	0	1	0	0
1	0	0	1	0	0	0	0	1	0	0	0	0	1	0	0
0	0	0	1	0	0	0	0	1	0	0	0	0	0	1	0
0	0	0	1	0	0	0	0	0	0	1	0	0	1	0	0
1	0	0	1	0	0	0	0	1	0	0	0	0	1	0	0
0	1	0	0	0	0	0	0	1	0	0	0	1	0	1	0
0	1	0	0	0	0	0	0	0	0	1	0	1	1	0	1
1	1	0	0	0	0	0	0	1	0	0	0	1	1	0	1
1	1	0	0	0	0	0	0	1	0	0	0	1	1	0	1
0	0	0	0	0	1	0	1	1	0	0	0	0	0	1	0
0	0	0	0	0	1	0	1	0	0	1	0	0	1	0	0
1	0	0	0	0	1	0	1	1	0	0	0	0	1	0	0
1	0	0	0	0	1	0	1	1	0	0	0	0	1	0	0
0	0	0	1	0	0	0	0	1	0	0	0	0	0	1	0
0	0	0	1	0	0	0	0	0	0	1	0	0	1	0	0
1	0	0	1	0	0	0	0	1	0	0	0	0	1	0	0
1	0	0	1	0	0	0	0	1	0	0	0	0	1	0	0
0	0	0	0	0	0	0	0	1	0	0	0	1	0	1	1
1	0	0	0	0	0	0	0	0	0	0	0	1	0	1	1
0	0	0	0	0	0	0	0	0	0	1	0	1	1	0	1
1	0	0	0	0	0	0	0	1	0	0	0	1	1	0	1
0	0	0	0	0	0	0	0	1	0	0	0	0	0	1	1
1	0	0	0	0	0	0	0	0	0	0	0	0	0	1	0
0	0	0	0	0	0	0	0	0	0	1	0	0	1	0	0
1	0	0	0	0	0	0	0	1	0	0	0	0	1	0	1
0	0	0	0	1	1	0	1	1	0	0	0	0	0	1	0
0	0	0	0	1	1	0	1	0	0	1	0	0	1	0	0
1	0	0	0	1	1	0	1	1	0	0	0	0	1	0	0
1	0	0	0	1	1	0	1	1	0	0	0	0	1	0	0
0	0	0	0	0	0	0	0	1	0	0	0	0	0	1	1
0	0	0	0	0	0	0	0	0	0	1	0	0	1	0	0
1	0	0	0	0	0	0	0	1	0	0	0	0	1	0	0
0	0	0	0	0	0	0	1	1	0	0	1	0	0	1	0
0	0	0	0	0	0	0	1	0	0	1	1	0	1	0	0
1	0	0	0	0	0	0	1	1	0	0	1	0	1	0	1
0	0	0	0	0	1	0	0	1	0	0	1	0	0	1	1
1	0	0	0	0	1	0	0	0	0	0	1	0	0	1	1
0	0	0	0	0	1	0	0	0	0	1	1	0	1	0	0
1	0	0	0	0	1	0	0	1	0	0	1	0	1	0	0
0	0	0	0	0	0	0	0	1	0	0	0	0	0	1	0
0	0	0	0	0	0	0	0	0	0	1	0	0	1	0	0
1	0	0	0	0	0	0	0	1	0	0	0	0	1	0	0
1	0	0	0	0	0	0	0	1	0	0	0	0	1	0	0
0	0	0	0	0	0	0	0	1	0	0	1	0	0	1	0
1	0	0	0	0	0	0	0	0	0	0	1	0	0	1	0
0	0	0	0	0	0	0	0	0	0	1	1	0	1	0	0
1	0	0	0	0	0	0	0	1	0	0	1	0	1	0	0
0	0	0	0	0	0	0	0	1	0	0	0	0	0	1	1
1	0	0	0	0	0	0	0	0	0	0	0	0	0	1	1
0	0	0	0	0	0	0	0	0	0	1	0	0	1	0	0
1	0	0	0	0	0	0	0	1	0	0	0	0	1	0	1
0	0	0	0	0	0	0	0	1	1	0	0	0	0	1	1
0	0	0	0	0	0	0	0	0	1	1	0	0	1	0	1
1	0	0	0	0	0	0	0	1	1	0	0	0	1	0	1
1	0	0	0	0	0	0	0	1	1	0	0	0	1	0	1
0	1	1	0	0	0	0	0	1	0	0	0	0	0	1	1
0	1	1	0	0	0	0	0	0	0	1	0	0	1	0	1
1	1	1	0	0	0	0	0	1	0	0	0	0	1	0	1
0	0	0	0	0	0	0	0	1	1	0	1	0	0	1	1
1	0	0	0	0	0	0	0	0	1	0	1	0	0	1	0
0	0	0	0	0	0	0	0	0	1	1	1	0	1	0	0
1	0	0	0	0	0	0	0	1	1	0	1	0	1	0	0
0	0	0	1	0	0	0	0	1	0	0	0	0	0	1	0
0	0	0	1	0	0	0	0	0	0	1	0	0	1	0	0
1	0	0	1	0	0	0	0	1	0	0	0	0	1	0	1
0	0	0	0	0	0	0	1	1	0	0	1	0	0	1	0
1	0	0	0	0	0	0	1	0	0	0	1	0	0	1	0
0	0	0	0	0	0	0	1	0	0	1	1	0	1	0	0
1	0	0	0	0	0	0	1	1	0	0	1	0	1	0	0
0	0	0	0	0	0	0	0	1	0	0	1	0	0	1	0
0	0	0	0	0	0	0	0	0	0	1	1	0	1	0	0
1	0	0	0	0	0	0	0	1	0	0	1	0	1	0	0
1	0	0	0	0	0	0	0	1	0	0	1	0	1	0	0
0	1	1	0	0	0	0	0	1	0	0	0	1	0	1	1
0	1	1	0	0	0	0	0	0	0	1	0	1	1	0	1
1	1	1	0	0	0	0	0	1	0	0	0	1	1	0	0
0	0	0	0	0	0	0	0	1	0	0	0	0	0	1	0
0	0	0	0	0	0	0	0	0	0	1	0	0	1	0	0
1	0	0	0	0	0	0	0	1	0	0	0	0	1	0	1
0	0	0	0	0	0	0	0	1	0	0	0	0	0	1	0
1	0	0	0	0	0	0	0	0	0	0	0	0	0	1	1
0	0	0	0	0	0	0	0	0	0	1	0	0	1	0	0
1	0	0	0	0	0	0	0	1	0	0	0	0	1	0	1
0	0	0	1	0	0	0	0	1	0	0	0	0	0	1	0
0	0	0	1	0	0	0	0	0	0	1	0	0	1	0	0
1	0	0	1	0	0	0	0	1	0	0	0	0	1	0	0
1	0	0	1	0	0	0	0	1	0	0	0	0	1	0	0
0	1	0	1	0	0	0	0	1	0	0	0	0	0	1	1
1	1	0	1	0	0	0	0	0	0	0	0	0	0	1	1
0	1	0	1	0	0	0	0	0	0	1	0	0	1	0	1
1	1	0	1	0	0	0	0	1	0	0	0	0	1	0	0
0	1	0	0	0	0	0	1	1	0	0	0	0	0	1	0
1	1	0	0	0	0	0	1	0	0	0	0	0	0	1	1
0	1	0	0	0	0	0	1	0	0	1	0	0	1	0	0
1	1	0	0	0	0	0	1	1	0	0	0	0	1	0	1
0	0	0	1	0	0	0	0	1	0	0	0	0	0	1	1
0	0	0	1	0	0	0	0	0	0	1	0	0	1	0	0
1	0	0	1	0	0	0	0	1	0	0	0	0	1	0	1
0	1	0	1	0	0	0	0	1	0	0	0	1	0	1	1
1	1	0	1	0	0	0	0	0	0	0	0	1	0	1	1
0	1	0	1	0	0	0	0	0	0	1	0	1	1	0	0
1	1	0	1	0	0	0	0	1	0	0	0	1	1	0	0
0	1	0	0	0	0	0	0	1	0	0	0	0	0	1	0
0	1	0	0	0	0	0	0	0	0	1	0	0	1	0	0
1	1	0	0	0	0	0	0	1	0	0	0	0	1	0	0
0	0	0	0	0	0	0	1	1	0	0	0	0	0	1	0
0	0	0	0	0	0	0	1	0	0	1	0	0	1	0	0
1	0	0	0	0	0	0	1	1	0	0	0	0	1	0	0
1	0	0	0	0	0	0	1	1	0	0	0	0	1	0	1
0	1	0	0	0	0	0	0	1	0	0	0	0	0	1	1
0	1	0	0	0	0	0	0	0	0	1	0	0	1	0	0
1	1	0	0	0	0	0	0	1	0	0	0	0	1	0	0
1	1	0	0	0	0	0	0	1	0	0	0	0	1	0	0
0	0	0	0	0	1	0	0	1	0	0	1	0	0	1	0
0	0	0	0	0	1	0	0	0	0	1	1	0	1	0	0
1	0	0	0	0	1	0	0	1	0	0	1	0	1	0	0
0	0	0	0	0	1	0	0	1	0	0	0	0	0	1	0
0	0	0	0	0	1	0	0	0	0	1	0	0	1	0	0
1	0	0	0	0	1	0	0	1	0	0	0	0	1	0	0
0	1	0	0	0	0	0	0	1	0	0	0	0	0	1	0
1	1	0	0	0	0	0	0	0	0	0	0	0	0	1	0
0	1	0	0	0	0	0	0	0	0	1	0	0	1	0	0
1	1	0	0	0	0	0	0	1	0	0	0	0	1	0	1
0	1	0	0	0	0	0	0	1	0	0	0	0	0	1	0
0	1	0	0	0	0	0	0	0	0	1	0	0	1	0	0
1	1	0	0	0	0	0	0	1	0	0	0	0	1	0	0
0	0	0	1	0	0	0	0	1	1	0	0	0	0	1	1
1	0	0	1	0	0	0	0	0	1	0	0	0	0	1	0
0	0	0	1	0	0	0	0	0	1	1	0	0	1	0	0
1	0	0	1	0	0	0	0	1	1	0	0	0	1	0	1
1	0	0	0	0	1	0	0	0	0	0	0	0	0	1	1
1	0	0	0	0	1	0	0	1	0	1	0	0	1	0	1
1	1	0	1	0	0	0	0	1	1	1	0	1	0	1	1
0	1	0	1	0	0	0	0	1	1	0	0	1	0	0	1
1	1	0	1	0	0	0	0	1	1	1	0	1	1	0	1
1	1	0	0	0	0	0	0	1	0	0	0	0	0	1	1
0	1	0	0	0	0	0	0	1	0	1	0	0	0	1	1
1	1	0	0	0	0	0	0	0	0	0	0	0	1	0	1
1	1	0	0	0	0	0	0	1	0	1	0	0	1	0	0
1	0	0	0	0	0	0	1	0	0	0	0	0	0	1	1
1	0	0	0	0	0	0	1	1	0	1	0	0	1	0	0
1	0	0	0	0	0	0	0	1	0	0	0	0	0	1	0
0	0	0	0	0	0	0	0	1	0	1	0	0	0	1	0
1	0	0	0	0	0	0	0	0	0	0	0	0	1	0	0
1	0	0	0	0	0	0	0	1	0	1	0	0	1	0	0
1	0	0	0	0	1	0	0	1	0	1	1	0	0	1	0
0	0	0	0	0	1	0	0	1	0	0	1	0	0	0	1
1	0	0	0	0	1	0	0	1	0	1	1	0	1	0	1
1	0	0	0	0	0	0	0	1	0	1	0	0	0	1	0
0	0	0	0	0	0	0	0	1	0	0	0	0	0	0	0
1	0	0	0	0	0	0	0	1	0	1	0	0	1	0	0
1	0	0	0	0	0	0	0	1	0	0	0	0	0	1	0
0	0	0	0	0	0	0	0	1	0	1	0	0	0	1	0
1	0	0	0	0	0	0	0	0	0	0	0	0	1	0	0
1	0	0	0	0	0	0	0	1	0	1	0	0	1	0	0
1	0	0	0	0	0	0	1	1	0	0	0	0	0	1	0
0	0	0	0	0	0	0	1	1	0	1	0	0	0	1	0
1	0	0	0	0	0	0	1	0	0	0	0	0	1	0	0
1	0	0	0	0	0	0	1	1	0	1	0	0	1	0	0
1	0	0	0	0	1	0	0	1	1	1	0	0	0	1	0
0	0	0	0	0	1	0	0	1	1	0	0	0	0	0	1
1	0	0	0	0	1	0	0	1	1	1	0	0	1	0	0
1	1	0	0	0	0	0	0	1	1	1	0	0	0	1	1
0	1	0	0	0	0	0	0	1	1	0	0	0	0	0	1
1	1	0	0	0	0	0	0	1	1	1	0	0	1	0	1
1	0	0	0	0	0	0	0	1	0	1	0	0	0	1	0
0	0	0	0	0	0	0	0	1	0	0	0	0	0	0	0
1	0	0	0	0	0	0	0	1	0	1	0	0	1	0	1
1	0	0	1	0	0	0	0	0	0	0	0	0	0	1	1
1	0	0	1	0	0	0	0	1	0	1	0	0	0	1	0
0	0	0	1	0	0	0	0	1	0	0	0	0	0	0	0
1	0	0	1	0	0	0	0	1	0	1	0	0	1	0	0
1	0	0	0	1	1	0	0	1	0	0	0	0	0	1	1
0	0	0	0	1	1	0	0	1	0	1	0	0	0	1	0
1	0	0	0	1	1	0	0	0	0	0	0	0	1	0	0
1	0	0	0	1	1	0	0	1	0	1	0	0	1	0	0
1	0	0	0	0	0	0	0	1	0	0	0	0	0	1	1
0	0	0	0	0	0	0	0	1	0	1	0	0	0	1	0
1	0	0	0	0	0	0	0	0	0	0	0	0	1	0	1
1	0	0	0	0	0	0	0	1	0	1	0	0	1	0	0
1	0	0	0	0	0	0	0	0	0	0	0	0	0	1	1
1	0	0	0	0	0	0	0	1	0	1	0	0	1	0	1
1	0	0	0	1	0	0	0	0	0	0	0	0	0	1	1
1	0	0	0	1	0	0	0	1	0	1	0	0	1	0	0
1	0	0	1	0	0	0	0	1	1	0	0	0	0	1	0
0	0	0	1	0	0	0	0	1	1	1	0	0	0	1	0
1	0	0	1	0	0	0	0	0	1	0	0	0	1	0	1
1	0	0	1	0	0	0	0	1	1	1	0	0	1	0	1
1	0	0	1	0	0	0	0	0	0	0	0	0	0	1	1
1	0	0	1	0	0	0	0	1	0	1	0	0	1	0	1
1	0	1	0	0	0	0	0	1	0	0	0	0	0	1	0
0	0	1	0	0	0	0	0	1	0	1	0	0	0	1	1
1	0	1	0	0	0	0	0	0	0	0	0	0	1	0	0
1	0	1	0	0	0	0	0	1	0	1	0	0	1	0	1
1	1	0	1	1	0	0	0	1	0	0	0	0	0	1	1
0	1	0	1	1	0	0	0	1	0	1	0	0	0	1	1
1	1	0	1	1	0	0	0	0	0	0	0	0	1	0	1
1	1	0	1	1	0	0	0	1	0	1	0	0	1	0	1
1	0	0	0	0	0	0	0	1	0	0	0	0	0	1	0
0	0	0	0	0	0	0	0	1	0	1	0	0	0	1	0
1	0	0	0	0	0	0	0	0	0	0	0	0	1	0	0
1	0	0	0	0	0	0	0	1	0	1	0	0	1	0	0
1	0	0	0	0	0	0	0	1	0	0	0	0	0	1	0
0	0	0	0	0	0	0	0	1	0	1	0	0	0	1	0
1	0	0	0	0	0	0	0	0	0	0	0	0	1	0	1
1	0	0	0	0	0	0	0	1	0	1	0	0	1	0	1
1	0	0	1	0	0	0	0	1	0	0	0	0	0	1	1
0	0	0	1	0	0	0	0	1	0	1	0	0	0	1	0
1	0	0	1	0	0	0	0	0	0	0	0	0	1	0	1
1	0	0	1	0	0	0	0	1	0	1	0	0	1	0	0
1	0	0	0	0	0	0	0	1	0	0	0	0	0	1	0
0	0	0	0	0	0	0	0	1	0	1	0	0	0	1	0
1	0	0	0	0	0	0	0	0	0	0	0	0	1	0	0
1	0	0	0	0	0	0	0	1	0	1	0	0	1	0	0
1	0	0	0	0	0	0	0	1	0	0	0	0	0	1	0
0	0	0	0	0	0	0	0	1	0	1	0	0	0	1	0
1	0	0	0	0	0	0	0	0	0	0	0	0	1	0	0
1	0	0	0	0	0	0	0	1	0	1	0	0	1	0	0
1	0	0	0	0	0	0	0	0	0	0	0	1	0	1	0
1	0	0	0	0	0	0	0	1	0	1	0	1	1	0	0
1	1	0	0	0	1	0	0	1	1	1	0	0	0	1	1
0	1	0	0	0	1	0	0	1	1	0	0	0	0	0	1
1	1	0	0	0	1	0	0	1	1	1	0	0	1	0	0
1	0	0	0	0	0	0	0	1	1	0	0	0	0	1	0
0	0	0	0	0	0	0	0	1	1	1	0	0	0	1	0
1	0	0	0	0	0	0	0	0	1	0	0	0	1	0	0
1	0	0	0	0	0	0	0	1	1	1	0	0	1	0	0
1	0	0	0	0	1	0	1	0	0	0	0	0	0	1	1
1	0	0	0	0	1	0	1	1	0	1	0	0	1	0	1
1	1	0	0	0	0	0	0	0	0	0	0	0	0	1	1
1	1	0	0	0	0	0	0	1	0	1	0	0	1	0	0
1	0	0	0	0	1	0	0	1	0	1	0	0	0	1	0
0	0	0	0	0	1	0	0	1	0	0	0	0	0	0	0
1	0	0	0	0	1	0	0	1	0	1	0	0	1	0	0
1	1	0	1	0	1	0	0	1	1	1	0	0	0	1	0
0	1	0	1	0	1	0	0	1	1	0	0	0	0	0	0
1	1	0	1	0	1	0	0	1	1	1	0	0	1	0	0
1	0	0	0	0	0	0	0	0	0	0	0	0	0	1	0
1	0	0	0	0	0	0	0	1	0	1	0	0	1	0	0
1	0	0	1	0	0	0	0	1	0	0	1	0	0	1	0
0	0	0	1	0	0	0	0	1	0	1	1	0	0	1	1
1	0	0	1	0	0	0	0	0	0	0	1	0	1	0	1
1	0	0	1	0	0	0	0	1	0	1	1	0	1	0	0
1	0	0	1	0	0	0	0	1	0	0	0	0	0	1	0
0	0	0	1	0	0	0	0	1	0	1	0	0	0	1	1
1	0	0	1	0	0	0	0	0	0	0	0	0	1	0	0
1	0	0	1	0	0	0	0	1	0	1	0	0	1	0	0
1	0	0	1	0	0	0	0	0	0	0	0	0	0	1	1
1	0	0	1	0	0	0	0	1	0	1	0	0	1	0	1
1	1	0	1	1	0	0	0	1	0	0	0	0	0	1	1
0	1	0	1	1	0	0	0	1	0	1	0	0	0	1	1
1	1	0	1	1	0	0	0	0	0	0	0	0	1	0	1
1	1	0	1	1	0	0	0	1	0	1	0	0	1	0	1
1	1	0	0	0	0	0	0	1	0	0	0	0	0	1	1
0	1	0	0	0	0	0	0	1	0	1	0	0	0	1	1
1	1	0	0	0	0	0	0	0	0	0	0	0	1	0	1
1	1	0	0	0	0	0	0	1	0	1	0	0	1	0	1
1	0	0	1	0	0	0	0	1	0	1	0	0	0	1	0
0	0	0	1	0	0	0	0	1	0	0	0	0	0	0	0
1	0	0	1	0	0	0	0	1	0	1	0	0	1	0	1
1	0	0	0	1	1	0	1	1	0	0	0	0	0	1	0
0	0	0	0	1	1	0	1	1	0	1	0	0	0	1	1
1	0	0	0	1	1	0	1	0	0	0	0	0	1	0	0
1	0	0	0	1	1	0	1	1	0	1	0	0	1	0	0
1	0	0	0	0	0	0	1	0	0	0	0	0	0	1	1
1	1	0	0	0	0	0	0	0	0	0	0	0	0	1	1
1	1	0	0	0	0	0	0	1	0	1	0	0	1	0	0
1	0	0	0	0	0	0	0	0	0	0	1	1	0	1	0
1	0	0	0	0	0	0	0	1	0	1	1	1	1	0	0
1	0	0	0	1	0	0	0	1	0	0	0	0	0	1	1
0	0	0	0	1	0	0	0	1	0	1	0	0	0	1	1
1	0	0	0	1	0	0	0	0	0	0	0	0	1	0	1
1	0	0	0	1	0	0	0	1	0	1	0	0	1	0	1
1	0	0	0	0	0	0	1	1	1	0	1	0	0	1	1
0	0	0	0	0	0	0	1	1	1	1	1	0	0	1	0
1	0	0	0	0	0	0	1	0	1	0	1	0	1	0	1
1	0	0	0	0	0	0	1	1	1	1	1	0	1	0	0
1	0	0	1	0	0	0	1	0	0	0	0	0	0	1	1
1	0	0	1	0	0	0	1	1	0	1	0	0	1	0	1
1	0	1	0	0	0	0	0	1	0	0	0	1	0	1	1
0	0	1	0	0	0	0	0	1	0	1	0	1	0	1	0
1	0	1	0	0	0	0	0	0	0	0	0	1	1	0	1
1	0	1	0	0	0	0	0	1	0	1	0	1	1	0	0
1	0	0	1	0	1	0	0	1	0	0	0	1	0	1	1
0	0	0	1	0	1	0	0	1	0	1	0	1	0	1	1
1	0	0	1	0	1	0	0	0	0	0	0	1	1	0	1
1	0	0	1	0	1	0	0	1	0	1	0	1	1	0	0
1	0	0	0	1	0	0	1	0	0	0	0	0	0	1	0
1	0	0	0	1	0	0	1	1	0	1	0	0	1	0	0
1	0	0	0	0	0	0	1	1	0	0	0	0	0	1	0
0	0	0	0	0	0	0	1	1	0	1	0	0	0	1	0
1	0	0	0	0	0	0	1	0	0	0	0	0	1	0	0
1	0	0	0	0	0	0	1	1	0	1	0	0	1	0	0
1	0	0	1	0	0	0	0	1	0	0	1	0	0	1	0
0	0	0	1	0	0	0	0	1	0	1	1	0	0	1	0
1	0	0	1	0	0	0	0	0	0	0	1	0	1	0	1
1	0	0	1	0	0	0	0	1	0	1	1	0	1	0	1
1	0	0	1	0	0	0	0	0	0	0	0	0	0	1	1
1	0	0	1	0	0	0	0	1	0	1	0	0	1	0	0
1	1	0	0	0	0	0	0	1	0	0	0	0	0	1	0
0	1	0	0	0	0	0	0	1	0	1	0	0	0	1	0
1	1	0	0	0	0	0	0	0	0	0	0	0	1	0	1
1	1	0	0	0	0	0	0	1	0	1	0	0	1	0	0
1	0	0	1	0	1	0	0	1	0	0	0	0	0	1	0
0	0	0	1	0	1	0	0	1	0	1	0	0	0	1	0
1	0	0	1	0	1	0	0	0	0	0	0	0	1	0	0
1	0	0	1	0	1	0	0	1	0	1	0	0	1	0	0
1	0	0	1	0	0	0	0	1	0	1	1	0	0	1	1
0	0	0	1	0	0	0	0	1	0	0	1	0	0	0	1
1	0	0	1	0	0	0	0	1	0	1	1	0	1	0	1
1	0	0	0	1	0	0	0	0	0	0	0	0	0	1	1
1	0	0	0	1	0	0	0	1	0	1	0	0	1	0	1
1	0	0	1	0	1	0	0	0	0	0	0	0	0	1	1
1	0	0	1	0	1	0	0	1	0	1	0	0	1	0	1
1	0	0	0	0	0	0	0	1	1	1	0	0	0	1	1
0	0	0	0	0	0	0	0	1	1	0	0	0	0	0	1
1	0	0	0	0	0	0	0	1	1	1	0	0	1	0	1
0	0	0	0	0	0	0	0	1	0	1	0	0	0	1	0
1	0	0	0	0	0	0	0	0	0	0	0	0	1	0	1
1	0	0	0	0	0	0	0	1	0	1	0	0	1	0	1
1	0	0	0	0	1	0	0	0	1	0	0	0	0	1	1
1	0	0	0	0	1	0	0	1	1	1	0	0	1	0	1
1	0	0	0	0	0	0	0	0	0	0	1	0	0	1	1
1	0	0	0	0	0	0	0	1	0	1	1	0	1	0	0
1	0	0	0	0	1	0	0	1	0	1	0	0	0	1	0
0	0	0	0	0	1	0	0	1	0	0	0	0	0	0	0
1	0	0	0	0	1	0	0	1	0	1	0	0	1	0	0
1	0	0	0	0	0	0	0	1	0	0	0	0	0	1	1
0	0	0	0	0	0	0	0	1	0	1	0	0	0	1	1
1	0	0	0	0	0	0	0	0	0	0	0	0	1	0	1
1	0	0	0	0	0	0	0	1	0	1	0	0	1	0	1
1	0	0	0	0	1	0	0	1	0	1	1	0	0	1	1
0	0	0	0	0	1	0	0	1	0	0	1	0	0	0	1
1	0	0	0	0	1	0	0	1	0	1	1	0	1	0	1
1	1	0	1	0	0	0	0	1	0	1	0	1	0	1	1
0	1	0	1	0	0	0	0	1	0	0	0	1	0	0	1
1	1	0	1	0	0	0	0	1	0	1	0	1	1	0	0
1	0	0	0	0	0	0	0	1	0	0	1	0	0	1	1
0	0	0	0	0	0	0	0	1	0	1	1	0	0	1	1
1	0	0	0	0	0	0	0	0	0	0	1	0	1	0	1
1	0	0	0	0	0	0	0	1	0	1	1	0	1	0	1
1	0	0	1	0	0	0	0	0	1	0	0	0	0	1	0
1	0	0	1	0	0	0	0	1	1	1	0	0	1	0	0
1	0	0	0	0	0	0	0	0	0	0	0	0	0	1	1
1	0	0	0	0	0	0	0	1	0	1	0	0	1	0	0
1	0	1	0	0	0	0	0	1	0	0	1	0	0	1	1
0	0	1	0	0	0	0	0	1	0	1	1	0	0	1	1
1	0	1	0	0	0	0	0	0	0	0	1	0	1	0	1
1	0	1	0	0	0	0	0	1	0	1	1	0	1	0	1
1	0	0	0	1	0	0	0	1	0	1	0	0	0	1	0
0	0	0	0	1	0	0	0	1	0	0	0	0	0	0	1
1	0	0	0	1	0	0	0	1	0	1	0	0	1	0	1
1	0	0	0	0	1	0	0	1	0	1	0	0	1	0	1
1	1	0	0	0	0	0	0	1	0	0	0	0	0	1	1
0	1	0	0	0	0	0	0	1	0	1	0	0	0	1	0
1	1	0	0	0	0	0	0	0	0	0	0	0	1	0	1
1	1	0	0	0	0	0	0	1	0	1	0	0	1	0	0
1	0	0	1	0	0	0	0	1	0	1	1	0	0	1	0
0	0	0	1	0	0	0	0	1	0	0	1	0	0	0	0
1	0	0	1	0	0	0	0	1	0	1	1	0	1	0	0
1	0	0	1	0	0	0	0	1	0	1	0	0	1	0	1
1	1	1	0	0	0	0	1	1	0	0	0	0	0	1	1
0	1	1	0	0	0	0	1	1	0	1	0	0	0	1	1
1	1	1	0	0	0	0	1	0	0	0	0	0	1	0	0
1	1	1	0	0	0	0	1	1	0	1	0	0	1	0	0
1	0	0	1	0	1	0	0	1	0	1	1	0	0	1	0
0	0	0	1	0	1	0	0	1	0	0	1	0	0	0	0
1	0	0	1	0	1	0	0	1	0	1	1	0	1	0	0
1	0	0	0	0	0	0	0	1	0	1	0	1	0	1	0
0	0	0	0	0	0	0	0	1	0	0	0	1	0	0	0
1	0	0	0	0	1	1	1	1	0	0	0	0	0	1	1
0	0	0	0	0	1	1	1	1	0	1	0	0	0	1	0
1	0	0	0	0	1	1	1	0	0	0	0	0	1	0	0
1	0	0	0	0	1	1	1	1	0	1	0	0	1	0	1
1	0	0	0	0	0	0	0	1	0	0	0	0	0	1	0
0	0	0	0	0	0	0	0	1	0	1	0	0	0	1	0
1	0	0	0	0	0	0	0	0	0	0	0	0	1	0	0
1	0	0	0	0	0	0	0	1	0	1	0	0	1	0	0
1	1	0	1	0	0	0	0	0	0	0	0	0	0	1	1
1	1	0	1	0	0	0	0	1	0	1	0	0	1	0	0
1	0	0	0	0	0	0	0	1	0	1	0	0	0	1	0
0	0	0	0	0	0	0	0	1	0	0	0	0	0	0	1
1	0	0	0	0	0	0	0	1	0	1	0	0	1	0	0
1	0	0	0	0	0	0	0	1	0	1	0	0	0	1	1
0	0	0	0	0	0	0	0	1	0	0	0	0	0	0	0
1	0	0	0	0	0	0	0	1	0	1	0	0	1	0	1
1	0	0	0	0	0	0	0	1	0	1	0	0	0	1	0
1	0	0	0	0	0	0	0	1	0	1	0	0	1	0	0
1	0	1	0	0	0	0	0	1	0	1	0	0	1	0	1
1	1	0	0	0	1	0	0	0	1	0	0	1	0	1	1
1	1	0	0	0	1	0	0	1	1	1	0	1	1	0	0
1	1	0	0	0	1	0	0	0	0	0	0	0	1	0	1
1	1	0	0	0	1	0	0	0	0	1	0	0	1	0	1
0	1	0	0	0	1	0	0	0	0	0	0	0	1	0	1
1	0	1	0	0	1	0	0	0	0	0	1	0	1	0	0
1	0	1	0	0	1	0	0	0	0	1	1	0	1	0	0
0	0	1	0	0	1	0	0	0	0	0	1	0	1	0	0
1	0	0	0	0	0	0	0	0	0	0	1	0	0	1	0
1	0	0	0	0	0	0	0	0	0	0	0	0	1	0	1
1	0	0	0	0	0	0	0	0	0	1	0	0	1	0	0
0	0	0	0	0	0	0	0	0	0	0	0	0	1	0	0
0	0	1	0	0	0	0	0	0	0	1	1	0	0	1	1
1	0	1	0	0	0	0	0	0	0	0	1	0	0	1	1
1	0	1	0	0	0	0	0	1	0	1	1	0	0	0	1
0	0	1	0	0	0	0	0	1	0	1	1	0	0	0	0
1	0	1	0	0	0	0	0	0	0	0	1	0	1	0	1
1	0	1	0	0	0	0	0	0	0	1	1	0	1	0	1
0	0	1	0	0	0	0	0	0	0	0	1	0	1	0	1
1	0	0	0	0	0	0	0	0	0	0	1	0	0	1	1
1	0	0	0	0	0	0	0	0	0	0	1	0	1	0	1
0	0	0	0	0	0	0	0	0	0	0	1	0	1	0	0
1	1	0	0	0	0	0	0	0	0	0	0	0	0	1	1
1	1	0	0	0	0	0	0	0	0	0	0	0	1	0	1
0	1	0	0	0	0	0	0	0	0	0	0	0	1	0	0
0	0	0	0	0	1	0	0	0	1	1	0	0	0	1	0
1	0	0	0	0	1	0	0	1	1	1	0	0	0	0	1
0	0	0	0	0	1	0	0	1	1	1	0	0	0	0	0
1	0	0	0	0	1	0	0	0	1	0	0	0	1	0	1
0	0	0	0	0	1	0	0	0	1	0	0	0	1	0	0
0	0	0	0	0	1	0	0	0	0	1	0	0	0	1	0
1	0	0	0	0	1	0	0	1	0	1	0	0	0	0	1
0	0	0	0	0	1	0	0	1	0	1	0	0	0	0	0
1	0	0	0	0	1	0	0	0	0	0	0	0	1	0	1
0	0	0	0	0	1	0	0	0	0	0	0	0	1	0	0
1	1	0	0	0	0	0	0	0	0	0	0	0	1	0	1
1	1	0	0	0	0	0	0	0	0	1	0	0	1	0	1
0	1	0	0	0	0	0	0	0	0	0	0	0	1	0	1
1	0	0	0	0	0	0	1	0	0	0	0	0	1	0	1
1	0	0	0	0	0	0	1	0	0	1	0	0	1	0	0
0	0	0	0	0	0	0	1	0	0	0	0	0	1	0	0
1	0	0	1	0	0	0	0	0	0	0	0	0	1	0	1
1	0	0	1	0	0	0	0	0	0	1	0	0	1	0	1
0	0	0	1	0	0	0	0	0	0	0	0	0	1	0	0
1	1	1	0	0	0	0	0	0	0	0	0	0	1	0	0
1	1	1	0	0	0	0	0	0	0	1	0	0	1	0	1
0	1	1	0	0	0	0	0	0	0	0	0	0	1	0	1
0	0	0	0	0	0	0	0	0	0	1	0	0	0	1	0
1	0	0	0	0	0	0	0	1	0	1	0	0	0	0	0
0	0	0	0	0	0	0	0	1	0	1	0	0	0	0	0
1	0	0	0	0	0	0	0	0	0	0	0	0	1	0	0
0	0	0	0	0	0	0	0	0	0	0	0	0	1	0	0
1	0	1	0	0	0	0	0	0	0	0	1	0	1	0	1
1	0	1	0	0	0	0	0	0	0	1	1	0	1	0	1
0	0	1	0	0	0	0	0	0	0	0	1	0	1	0	1
1	0	0	0	0	0	0	0	0	1	0	1	0	1	0	1
1	0	0	0	0	0	0	0	0	1	1	1	0	1	0	1
0	0	0	0	0	0	0	0	0	1	0	1	0	1	0	0
1	0	0	0	0	0	0	0	0	0	0	1	0	1	0	1
1	0	0	0	0	0	0	0	0	0	1	1	0	1	0	1
0	0	0	0	0	0	0	0	0	0	0	1	0	1	0	0
0	0	0	0	0	0	0	0	0	1	1	1	0	0	1	0
1	0	0	0	0	0	0	0	1	1	1	1	0	0	0	0
0	0	0	0	0	0	0	0	1	1	1	1	0	0	0	0
1	0	0	0	0	0	0	0	0	1	0	1	0	1	0	1
0	0	0	0	0	0	0	0	0	1	0	1	0	1	0	0
1	0	0	0	0	0	0	0	0	0	0	0	0	1	0	1
1	0	0	0	0	0	0	0	0	0	1	0	0	1	0	1
0	0	0	0	0	0	0	0	0	0	0	0	0	1	0	1
1	0	0	0	0	0	0	1	0	0	0	0	0	1	0	1
1	0	0	0	0	0	0	1	0	0	1	0	0	1	0	0
0	0	0	0	0	0	0	1	0	0	0	0	0	1	0	0
1	0	0	0	0	0	0	0	0	0	0	0	0	0	1	0
1	0	0	0	0	0	0	0	0	0	0	0	0	1	0	0
0	0	0	0	0	0	0	0	0	0	0	0	0	1	0	0
0	0	0	0	0	0	0	0	0	0	1	0	0	0	1	0
1	0	0	0	0	0	0	0	1	0	1	0	0	0	0	0
0	0	0	0	0	0	0	0	1	0	1	0	0	0	0	0
1	0	0	0	0	0	0	0	0	0	0	0	0	1	0	0
0	0	0	0	0	0	0	0	0	0	0	0	0	1	0	0
1	0	0	1	0	1	0	0	0	0	0	1	1	1	0	1
1	0	0	1	0	1	0	0	0	0	1	1	1	1	0	1
0	0	0	1	0	1	0	0	0	0	0	1	1	1	0	1
1	0	0	0	0	0	0	0	0	0	0	1	0	1	0	0
1	0	0	0	0	0	0	0	0	0	1	1	0	1	0	0
0	0	0	0	0	0	0	0	0	0	0	1	0	1	0	1
1	1	0	1	0	0	0	0	0	0	0	0	0	0	1	0
1	1	0	1	0	0	0	0	0	0	0	0	0	1	0	0
0	1	0	1	0	0	0	0	0	0	0	0	0	1	0	0
1	1	0	0	0	0	0	1	0	0	0	0	0	1	0	0
1	1	0	0	0	0	0	1	0	0	1	0	0	1	0	0
0	1	0	0	0	0	0	1	0	0	0	0	0	1	0	0
1	0	0	0	0	1	0	0	0	0	0	0	0	1	0	1
1	0	0	0	0	1	0	0	0	0	1	0	0	1	0	0
0	0	0	0	0	1	0	0	0	0	0	0	0	1	0	0
0	1	0	1	0	0	0	0	0	0	1	0	1	0	1	0
1	1	0	1	0	0	0	0	1	0	1	0	1	0	0	1
0	1	0	1	0	0	0	0	1	0	1	0	1	0	0	0
1	1	0	1	0	0	0	0	0	0	0	0	1	1	0	1
0	1	0	1	0	0	0	0	0	0	0	0	1	1	0	0
1	0	0	0	0	0	0	0	0	0	0	0	1	0	1	0
1	0	0	0	0	0	0	0	0	0	0	0	1	1	0	1
0	0	0	0	0	0	0	0	0	0	0	0	1	1	0	0
1	1	0	1	0	1	0	0	0	0	0	0	1	0	1	0
1	1	0	1	0	1	0	0	0	0	0	0	1	1	0	0
0	1	0	1	0	1	0	0	0	0	0	0	1	1	0	0
1	1	1	0	0	1	0	0	0	0	0	0	0	0	1	1
1	1	1	0	0	1	0	0	0	0	0	0	0	1	0	1
0	1	1	0	0	1	0	0	0	0	0	0	0	1	0	1
0	0	1	0	0	0	0	0	0	0	1	0	0	0	1	0
1	0	1	0	0	0	0	0	1	0	1	0	0	0	0	0
1	0	1	0	0	0	0	0	0	0	0	0	0	1	0	1
0	0	1	0	0	0	0	0	0	0	0	0	0	1	0	1
1	1	0	1	0	0	0	0	0	0	0	0	0	0	1	1
1	1	0	1	0	0	0	0	0	0	0	0	0	1	0	1
0	1	0	1	0	0	0	0	0	0	0	0	0	1	0	0
1	1	0	0	0	0	1	1	0	0	0	0	0	1	0	1
1	1	0	0	0	0	1	1	0	0	1	0	0	1	0	0
0	1	0	0	0	0	1	1	0	0	0	0	0	1	0	1
1	0	0	0	0	0	0	0	0	0	0	0	0	1	0	1
1	0	0	0	0	0	0	0	0	0	1	0	0	1	0	1
0	0	0	0	0	0	0	0	0	0	0	0	0	1	0	1
0	1	0	0	0	0	1	0	0	0	1	0	1	0	1	0
1	1	0	0	0	0	1	0	1	0	1	0	1	0	0	1
0	1	0	0	0	0	1	0	1	0	1	0	1	0	0	0
0	0	0	0	0	1	0	0	0	0	1	0	1	0	1	0
1	0	0	0	0	1	0	0	1	0	1	0	1	0	0	0
0	0	0	0	0	1	0	0	1	0	1	0	1	0	0	0
1	0	0	0	0	1	0	0	0	0	0	0	1	1	0	0
0	0	0	0	0	1	0	0	0	0	0	0	1	1	0	0
1	0	0	0	0	0	0	0	0	0	0	1	0	0	1	1
1	0	0	0	0	0	0	0	0	0	0	1	0	1	0	1
0	0	0	0	0	0	0	0	0	0	0	1	0	1	0	1
1	0	0	0	0	0	0	0	0	0	0	0	0	1	0	1
1	0	0	0	0	0	0	0	0	0	1	0	0	1	0	1
0	0	0	0	0	0	0	0	0	0	0	0	0	1	0	0
0	0	0	0	0	0	0	0	0	0	1	0	0	0	1	0
1	0	0	0	0	0	0	0	1	0	1	0	0	0	0	0
0	0	0	0	0	0	0	0	1	0	1	0	0	0	0	0
1	0	0	0	0	0	0	0	0	0	0	0	0	1	0	0
0	0	0	0	0	0	0	0	0	0	0	0	0	1	0	0
1	0	0	1	0	0	0	0	0	0	0	0	0	1	0	1
1	0	0	1	0	0	0	0	0	0	1	0	0	1	0	0
0	0	0	1	0	0	0	0	0	0	0	0	0	1	0	0
0	1	0	0	0	0	0	0	0	0	1	0	0	0	1	1
1	1	0	0	0	0	0	0	0	0	0	0	0	0	1	1
1	1	0	0	0	0	0	0	1	0	1	0	0	0	0	1
0	1	0	0	0	0	0	0	1	0	1	0	0	0	0	1
1	1	0	0	0	0	0	0	0	0	0	0	0	1	0	1
1	1	0	0	0	0	0	0	0	0	1	0	0	1	0	0
0	1	0	0	0	0	0	0	0	0	0	0	0	1	0	1
0	0	0	0	0	0	0	0	0	0	1	0	0	0	1	0
1	0	0	0	0	0	0	0	1	0	1	0	0	0	0	0
0	0	0	0	0	0	0	0	1	0	1	0	0	0	0	0
1	0	0	0	0	0	0	0	0	0	0	0	0	1	0	0
0	0	0	0	0	0	0	0	0	0	0	0	0	1	0	0
1	0	0	0	0	0	0	0	0	0	0	0	0	1	0	1
1	0	0	0	0	0	0	0	0	0	1	0	0	1	0	0
0	0	0	0	0	0	0	0	0	0	0	0	0	1	0	0
1	0	0	0	0	0	0	0	0	0	0	0	0	0	1	1
1	0	0	0	0	0	0	0	0	0	0	0	0	1	0	1
0	0	0	0	0	0	0	0	0	0	0	0	0	1	0	0
1	0	0	0	1	0	0	1	0	0	0	0	0	1	0	0
1	0	0	0	1	0	0	1	0	0	1	0	0	1	0	0
0	0	0	0	1	0	0	1	0	0	0	0	0	1	0	1
0	0	0	0	0	0	0	0	0	0	1	0	0	0	1	0
1	0	0	0	0	0	0	0	1	0	1	0	0	0	0	0
0	0	0	0	0	0	0	0	1	0	1	0	0	0	0	0
1	0	0	0	0	0	0	0	0	0	0	0	0	1	0	0
0	0	0	0	0	0	0	0	0	0	0	0	0	1	0	0
0	0	0	0	0	0	0	0	0	1	1	0	0	0	1	0
1	0	0	0	0	0	0	0	1	1	1	0	0	0	0	1
0	0	0	0	0	0	0	0	1	1	1	0	0	0	0	0
1	0	0	0	0	0	0	0	0	1	0	0	0	1	0	1
0	0	0	0	0	0	0	0	0	1	0	0	0	1	0	0
1	0	0	0	0	0	0	1	0	0	0	0	0	0	1	0
1	0	0	0	0	0	0	1	0	0	0	0	0	1	0	0
0	0	0	0	0	0	0	1	0	0	0	0	0	1	0	0
0	1	0	0	0	0	0	0	0	0	1	0	0	0	1	0
1	1	0	0	0	0	0	0	1	0	1	0	0	0	0	1
0	1	0	0	0	0	0	0	1	0	1	0	0	0	0	0
1	1	0	0	0	0	0	0	0	0	0	0	0	1	0	0
0	1	0	0	0	0	0	0	0	0	0	0	0	1	0	0
1	0	0	0	0	0	0	0	0	0	0	0	0	1	0	1
1	0	0	0	0	0	0	0	0	0	1	0	0	1	0	1
0	0	0	0	0	0	0	0	0	0	0	0	0	1	0	1
1	0	0	1	0	0	0	0	0	0	1	0	0	1	0	1
0	0	0	1	0	0	0	0	0	0	0	0	0	1	0	0
1	0	0	0	0	1	0	0	0	1	0	0	0	0	1	1
1	0	0	0	0	1	0	0	0	1	0	0	0	1	0	0
0	0	0	0	0	1	0	0	0	1	0	0	0	1	0	0
0	1	0	0	0	0	0	0	0	0	1	0	0	0	1	1
1	1	0	0	0	0	0	0	1	0	1	0	0	0	0	0
0	1	0	0	0	0	0	0	1	0	1	0	0	0	0	1
1	1	0	0	0	0	0	0	0	0	0	0	0	1	0	0
0	1	0	0	0	0	0	0	0	0	0	0	0	1	0	1
0	0	0	0	0	0	0	0	0	0	1	0	0	0	1	0
1	0	0	0	0	0	0	0	1	0	1	0	0	0	0	1
0	0	0	0	0	0	0	0	1	0	1	0	0	0	0	0
1	0	0	0	0	0	0	0	0	0	0	0	0	1	0	1
0	0	0	0	0	0	0	0	0	0	0	0	0	1	0	0
1	1	0	0	0	0	0	0	0	0	0	0	0	0	1	1
1	1	0	0	0	0	0	0	0	0	0	0	0	1	0	0
0	1	0	0	0	0	0	0	0	0	0	0	0	1	0	1
1	0	0	0	0	0	0	0	0	0	0	0	0	1	0	0
1	0	0	0	0	0	0	0	0	0	1	0	0	1	0	0
0	0	0	0	0	0	0	0	0	0	0	0	0	1	0	0
0	0	0	1	0	0	0	0	0	0	1	0	0	0	1	0
1	0	0	1	0	0	0	0	1	0	1	0	0	0	0	1
0	0	0	1	0	0	0	0	1	0	1	0	0	0	0	0
1	0	0	1	0	0	0	0	0	0	0	0	0	1	0	1
0	0	0	1	0	0	0	0	0	0	0	0	0	1	0	0
1	0	0	0	1	0	0	0	0	0	0	0	0	0	1	0
1	0	0	0	1	0	0	0	0	0	0	0	0	1	0	1
0	0	0	0	1	0	0	0	0	0	0	0	0	1	0	1
1	1	1	0	0	0	0	0	0	0	0	0	0	0	1	1
1	1	1	0	0	0	0	0	0	0	0	0	0	1	0	1
0	1	1	0	0	0	0	0	0	0	0	0	0	1	0	0
1	0	0	0	0	0	0	0	0	0	0	0	0	0	1	1
1	0	0	0	0	0	0	0	0	0	0	0	0	1	0	0
0	0	0	0	0	0	0	0	0	0	0	0	0	1	0	0
1	0	0	0	0	0	1	0	0	0	0	0	0	1	0	1
1	0	0	0	0	0	1	0	0	0	1	0	0	1	0	1
0	0	0	0	0	0	1	0	0	0	0	0	0	1	0	0
0	0	0	1	0	0	0	0	0	1	1	0	1	0	1	0
1	0	0	1	0	0	0	0	1	1	1	0	1	0	0	1
0	0	0	1	0	0	0	0	1	1	1	0	1	0	0	0
1	0	0	1	0	0	0	0	0	1	0	0	1	1	0	1
0	0	0	1	0	0	0	0	0	1	0	0	1	1	0	0
1	1	0	0	0	0	0	1	0	0	0	0	0	0	1	0
1	1	0	0	0	0	0	1	0	0	0	0	0	1	0	0
0	1	0	0	0	0	0	1	0	0	0	0	0	1	0	0
1	1	0	1	0	0	0	0	0	0	0	0	0	0	1	1
1	1	0	1	0	0	0	0	0	0	0	0	0	1	0	1
0	1	0	1	0	0	0	0	0	0	0	0	0	1	0	1
1	0	1	0	0	0	0	0	0	0	0	0	0	1	0	1
1	0	1	0	0	0	0	0	0	0	1	0	0	1	0	1
0	0	1	0	0	0	0	0	0	0	0	0	0	1	0	0
1	0	0	0	0	0	0	0	0	0	0	0	0	0	1	0
1	0	0	0	0	0	0	0	0	0	0	0	0	1	0	0
0	0	0	0	0	0	0	0	0	0	0	0	0	1	0	0
0	0	0	1	0	1	0	0	0	1	1	0	0	0	1	0
0	0	0	1	0	1	0	0	1	1	1	0	0	0	0	1
1	0	0	1	0	1	0	0	0	1	0	0	0	1	0	0
0	0	0	1	0	1	0	0	0	1	0	0	0	1	0	0
1	0	0	1	0	1	0	0	0	0	0	1	0	1	0	1
1	0	0	1	0	1	0	0	0	0	1	1	0	1	0	1
0	0	0	1	0	1	0	0	0	0	0	1	0	1	0	0
1	0	0	0	0	0	0	1	0	0	0	0	0	1	0	1
1	0	0	0	0	0	0	1	0	0	1	0	0	1	0	0
0	0	0	0	0	0	0	1	0	0	0	0	0	1	0	0
0	0	1	0	0	1	0	0	0	0	1	0	0	0	1	0
1	0	1	0	0	1	0	0	1	0	1	0	0	0	0	1
0	0	1	0	0	1	0	0	1	0	1	0	0	0	0	0
1	0	1	0	0	1	0	0	0	0	0	0	0	1	0	1
0	0	1	0	0	1	0	0	0	0	0	0	0	1	0	0
0	0	0	1	0	0	0	0	0	0	1	0	0	0	1	0
1	0	0	1	0	0	0	0	1	0	1	0	0	0	0	1
0	0	0	1	0	0	0	0	1	0	1	0	0	0	0	0
1	0	0	1	0	0	0	0	0	0	0	0	0	1	0	1
0	0	0	1	0	0	0	0	0	0	0	0	0	1	0	0
1	0	1	0	0	0	0	1	0	0	0	0	0	1	0	1
1	0	1	0	0	0	0	1	0	0	1	0	0	1	0	1
0	0	1	0	0	0	0	1	0	0	0	0	0	1	0	0
1	0	0	0	1	0	0	0	0	0	0	0	1	0	1	1
1	0	0	0	1	0	0	0	0	0	0	0	1	1	0	0
0	0	0	0	1	0	0	0	0	0	0	0	1	1	0	0
1	0	0	0	0	0	0	0	0	0	0	0	0	0	1	0
1	0	0	0	0	0	0	0	0	0	0	0	0	1	0	0
0	0	0	0	0	0	0	0	0	0	0	0	0	1	0	0
1	0	0	1	0	0	0	1	0	0	0	0	0	1	0	1
1	0	0	1	0	0	0	1	0	0	1	0	0	1	0	0
0	0	0	1	0	0	0	1	0	0	0	0	0	1	0	0
1	0	0	0	1	0	0	0	0	0	0	0	1	0	1	0
1	0	0	0	1	0	0	0	0	0	0	0	1	1	0	1
0	0	0	0	1	0	0	0	0	0	0	0	1	1	0	0
1	0	0	0	0	0	0	1	0	0	0	0	0	1	0	1
1	0	0	0	0	0	0	1	0	0	1	0	0	1	0	0
0	0	0	0	0	0	0	1	0	0	0	0	0	1	0	0
1	0	0	0	0	0	0	1	0	0	0	0	0	1	0	0
1	0	0	0	0	0	0	1	0	0	1	0	0	1	0	0
0	0	0	0	0	0	0	1	0	0	0	0	0	1	0	0
1	0	0	0	0	0	0	0	0	0	0	1	0	0	1	0
1	0	0	0	0	0	0	0	0	0	0	1	0	1	0	0
0	0	0	0	0	0	0	0	0	0	0	1	0	1	0	0
0	0	0	0	0	0	0	0	0	0	1	0	1	0	1	0
1	0	0	0	0	0	0	0	1	0	1	0	1	0	0	0
0	0	0	0	0	0	0	0	1	0	1	0	1	0	0	0
0	0	0	0	0	1	0	0	0	0	1	0	0	0	1	0
1	0	0	0	0	1	0	0	1	0	1	0	0	0	0	0
0	0	0	0	0	1	0	0	1	0	1	0	0	0	0	0
1	0	0	0	0	1	0	0	0	0	0	0	0	1	0	0
0	0	0	0	0	1	0	0	0	0	0	0	0	1	0	0
1	0	0	1	0	0	0	0	0	0	0	0	0	0	1	1
1	0	0	1	0	0	0	0	0	0	0	0	0	1	0	1
0	0	0	1	0	0	0	0	0	0	0	0	0	1	0	0
