# Supplementary material
Source: ML conference proceedings conference paper supplement (https://proceedings.neurips.cc/paper_files/paper/2022/hash/5afaa8b4dd18eb1eed055d2d821b58ae-Abstract.html)
Supplement: Supplementary file 1 [file 5afaa8b4dd18eb1eed055d2d821b58ae-Supplemental-Conference.zip › 6769_exploring_the_whole_rashomon_s-Supplementary Material/6769_code_repo/experiments/datasets/fico/fico-binary.csv]

ExternalRiskEstimate<0.49	ExternalRiskEstimate<0.65	ExternalRiskEstimate<0.80	NumSatisfactoryTrades<0.5	TradeOpenTime<0.6	TradeOpenTime<0.85	TradeFrequency<0.45	TradeFrequency<0.6	Delinquency<0.55	Delinquency<0.75	Installment<0.5	Installment<0.7	Inquiry<0.75	RevolvingBalance<0.4	RevolvingBalance<0.6	Utilization<0.6	TradeWBalance<0.33	RiskPerform
0	0	0	0	0	1	0	0	0	0	1	1	0	0	1	1	0	0
0	0	0	0	0	0	0	0	0	1	0	1	0	1	1	0	1	0
0	0	1	0	0	0	0	0	1	1	1	1	0	0	1	1	0	0
0	0	1	1	0	1	0	1	1	1	0	1	0	0	0	0	0	0
1	1	1	0	1	1	0	1	1	1	1	1	0	0	0	1	0	0
0	0	0	1	0	1	1	1	0	1	0	1	0	0	0	0	0	0
0	0	0	1	0	0	0	1	0	1	0	1	0	0	0	1	0	1
0	0	1	0	0	1	0	1	0	1	1	1	0	0	1	1	1	1
0	0	0	1	1	1	0	1	0	0	1	1	0	0	0	0	0	0
0	0	0	0	0	0	0	1	0	1	1	1	0	0	1	1	0	0
1	1	1	0	0	1	0	1	1	1	1	1	0	0	1	1	0	1
0	0	0	0	1	1	0	1	0	0	1	1	0	0	0	1	0	0
0	1	1	1	0	1	0	1	0	1	1	1	0	0	1	1	0	0
0	0	1	0	1	1	0	1	1	1	1	1	0	1	1	1	0	1
0	0	0	0	1	1	0	0	0	1	0	0	0	0	0	0	0	0
0	0	0	1	0	1	1	1	1	1	0	1	0	0	0	0	0	0
0	0	0	0	0	1	0	1	0	0	1	1	0	0	0	1	0	0
0	0	0	0	0	1	0	0	0	1	0	1	0	0	1	1	0	0
1	1	1	0	1	1	0	1	1	1	1	1	0	1	1	1	0	0
0	0	1	0	0	0	0	1	1	1	1	1	0	0	1	1	0	0
0	0	0	1	0	1	1	1	0	1	0	1	0	0	0	0	0	0
0	1	1	1	1	1	0	1	1	1	1	1	0	0	0	1	0	0
0	1	1	1	0	1	1	1	1	1	1	1	0	0	0	0	0	1
0	0	1	0	0	0	0	1	0	0	1	1	0	1	1	1	0	0
0	0	1	0	0	1	0	1	0	1	0	1	0	0	1	1	0	0
0	0	0	1	1	1	0	0	0	1	0	1	0	0	0	1	0	0
0	0	0	0	0	1	0	0	0	0	1	1	0	0	0	1	0	0
1	1	1	0	0	1	0	1	1	1	1	1	0	0	1	1	0	0
0	0	1	0	1	1	0	0	0	0	0	1	0	0	1	1	0	0
0	0	1	1	1	1	0	0	0	1	1	1	0	0	0	0	0	0
0	1	1	0	0	1	0	0	0	1	1	1	0	1	1	1	1	1
0	0	0	0	0	1	0	0	0	0	1	1	0	0	0	1	0	0
0	0	1	1	0	1	0	0	0	1	0	1	0	0	1	1	0	0
0	1	1	0	0	1	0	1	1	1	1	1	0	0	0	1	0	1
0	0	1	1	0	1	0	0	0	1	1	1	0	0	1	1	0	0
1	1	1	0	1	1	0	1	1	1	1	1	0	1	1	1	1	1
0	0	0	1	0	1	0	0	0	0	0	1	0	0	0	0	0	0
0	0	1	1	0	1	0	1	0	1	1	1	0	0	0	1	0	0
0	0	1	0	0	1	0	1	0	1	1	1	0	0	0	1	0	0
1	1	1	0	0	0	0	0	1	1	0	1	0	1	1	1	0	0
1	1	1	0	1	1	0	1	1	1	0	1	0	1	1	0	0	1
1	1	1	0	0	1	0	1	1	1	0	1	0	1	1	1	0	1
1	1	1	1	1	1	1	1	1	1	1	1	0	0	1	1	0	0
0	0	1	0	0	0	0	1	1	1	1	1	0	0	0	1	0	0
0	1	1	1	1	1	1	1	1	1	1	1	0	0	0	0	0	0
0	1	1	1	0	1	0	1	1	1	1	1	0	0	0	1	0	0
1	1	1	1	1	1	1	1	1	1	1	1	0	0	1	1	0	1
1	1	1	1	1	1	1	1	1	1	0	1	0	1	1	1	0	1
0	0	0	0	0	1	0	1	0	0	0	1	0	0	0	0	0	0
0	0	1	1	1	1	1	1	0	0	1	1	0	0	0	0	0	0
1	1	1	0	1	1	0	1	1	1	1	1	0	0	0	0	0	0
1	1	1	1	0	1	1	1	1	1	1	1	0	0	1	1	0	1
0	1	1	0	0	1	0	1	1	1	1	1	0	0	0	0	0	0
0	0	1	0	0	1	0	1	0	1	0	1	0	0	0	0	0	0
1	1	1	1	1	1	0	1	0	1	0	1	0	1	1	1	0	0
0	0	1	0	1	1	0	1	1	1	0	1	1	0	1	1	0	1
0	1	1	1	1	1	0	1	1	1	1	1	0	0	1	1	0	0
1	1	1	0	0	1	0	1	1	1	0	1	0	0	1	1	0	0
0	1	1	0	0	1	0	1	1	1	1	1	0	0	0	1	0	0
0	0	0	0	0	1	0	0	0	0	1	1	0	0	0	1	0	0
0	1	1	1	1	1	0	1	0	1	1	1	0	0	0	1	0	0
0	0	0	0	0	1	0	1	0	0	1	1	0	0	1	1	0	0
1	1	1	1	0	1	1	1	1	1	0	1	0	0	1	1	0	0
1	1	1	0	0	1	0	1	1	1	0	1	0	1	1	0	0	1
0	0	1	0	1	1	0	1	1	1	0	1	1	0	1	1	0	1
0	0	0	1	0	1	1	1	0	0	0	1	0	0	0	0	0	0
0	0	1	0	1	1	0	1	1	1	0	1	1	0	1	1	0	1
0	0	1	0	1	1	0	1	1	1	0	1	1	0	1	1	0	0
0	0	1	1	0	1	1	1	0	1	1	1	0	0	1	1	1	0
0	1	1	0	0	1	0	1	0	1	0	1	0	0	1	1	0	0
0	0	1	0	1	1	0	1	1	1	0	1	1	0	1	1	0	1
0	1	1	1	1	1	1	1	1	1	1	1	0	0	1	1	0	1
1	1	1	0	1	1	0	1	1	1	0	1	0	1	1	0	0	0
1	1	1	0	1	1	0	0	1	1	1	1	0	1	1	0	1	0
0	1	1	0	1	1	0	1	0	0	1	1	0	0	1	1	0	1
1	1	1	1	0	1	0	1	0	1	1	1	0	0	1	1	0	1
0	0	1	0	0	1	0	1	0	1	0	1	0	0	0	1	0	0
0	1	1	0	0	0	0	0	1	1	0	1	0	0	1	0	0	0
1	1	1	0	1	1	0	0	1	1	0	1	0	0	1	1	0	1
0	1	1	1	1	1	1	1	0	1	1	1	0	0	1	1	0	1
0	0	0	0	1	1	0	0	0	0	0	1	0	0	1	0	0	1
0	0	1	1	0	1	1	1	0	1	0	1	0	0	0	1	0	1
0	0	1	0	0	0	0	1	0	1	1	1	0	0	0	1	0	0
0	1	1	1	1	1	0	1	0	1	1	1	0	0	1	1	0	0
0	0	0	1	0	1	0	0	0	0	1	1	0	0	1	1	0	0
0	0	0	0	1	1	0	0	0	0	0	1	0	0	0	1	0	0
0	0	1	0	1	1	0	1	1	1	0	1	1	0	1	1	0	0
0	0	1	0	1	1	0	0	0	1	1	1	0	0	0	0	0	0
0	0	0	0	1	1	0	1	0	1	0	1	0	0	0	1	0	0
0	0	1	0	0	0	0	0	1	1	0	0	0	0	0	0	0	1
1	1	1	0	0	1	0	1	1	1	0	1	0	0	1	1	0	1
0	0	1	1	0	1	0	1	0	1	0	1	0	0	0	0	0	0
0	1	1	1	0	1	0	1	1	1	0	1	0	0	1	1	0	0
1	1	1	1	1	1	0	1	1	1	1	1	0	0	1	1	1	0
0	1	1	1	1	1	0	1	1	1	0	1	0	0	1	1	0	1
1	1	1	1	1	1	1	1	0	1	0	1	0	0	0	1	0	1
0	0	1	1	1	1	0	1	0	0	1	1	0	0	0	0	0	0
0	0	0	0	0	0	0	0	0	1	1	1	0	0	0	1	0	1
1	1	1	0	1	1	0	1	1	1	0	1	0	1	1	1	0	1
0	1	1	0	0	1	0	1	1	1	0	1	0	0	1	1	0	0
0	0	1	0	0	1	0	1	0	1	0	1	0	0	0	0	0	0
1	1	1	0	0	1	0	1	1	1	1	1	0	0	1	1	0	1
0	1	1	1	0	1	0	1	0	1	0	1	0	0	0	0	0	0
0	0	1	0	0	1	0	0	1	1	1	1	0	0	1	1	0	0
0	1	1	0	0	1	0	1	0	1	1	1	0	0	1	1	1	1
0	0	0	1	1	1	1	1	0	0	1	1	0	0	0	0	0	0
0	0	1	1	0	1	0	1	0	0	0	1	0	0	1	1	0	0
0	0	1	0	1	1	0	1	1	1	0	1	1	0	1	1	0	1
1	1	1	0	1	1	0	1	1	1	0	1	0	1	1	1	0	1
1	1	1	0	1	1	0	1	1	1	0	1	0	1	1	1	0	1
0	1	1	0	0	1	0	1	1	1	1	1	0	1	1	1	0	1
0	0	1	0	1	1	0	1	0	0	0	1	0	0	0	1	0	0
0	0	1	0	1	1	0	1	1	1	0	1	1	0	1	1	0	1
1	1	1	1	0	1	0	1	1	1	0	1	0	1	1	1	0	0
0	0	1	0	1	1	0	0	0	1	0	0	0	0	0	0	0	0
0	0	1	0	1	1	0	1	1	1	0	1	1	0	1	1	0	0
0	0	0	0	0	1	0	0	0	1	1	1	0	0	0	1	0	0
1	1	1	1	0	1	0	1	0	1	0	1	0	1	1	1	0	1
0	0	1	0	1	1	0	1	1	1	0	1	1	0	1	1	0	0
0	1	1	0	1	1	0	1	0	1	1	1	0	1	1	1	0	0
0	0	1	1	1	1	0	0	0	1	1	1	0	1	1	0	0	1
0	0	0	1	0	1	0	0	0	1	0	1	0	0	0	1	0	0
0	0	0	0	0	1	0	1	0	0	0	1	0	0	0	1	0	0
0	0	1	0	1	1	0	1	0	1	1	1	0	0	0	0	0	0
0	0	1	0	1	1	0	1	1	1	0	1	1	0	1	1	0	0
0	0	0	0	0	1	0	0	0	0	1	1	0	0	1	1	0	0
0	1	1	1	0	1	0	1	0	1	0	1	0	0	0	1	0	0
0	0	1	0	1	1	0	1	0	0	1	1	0	0	0	1	0	0
1	1	1	0	0	1	0	1	1	1	1	1	0	0	1	1	0	0
0	0	0	0	0	0	0	1	0	0	0	1	0	0	0	1	0	0
0	0	0	1	0	1	0	1	0	1	0	1	0	0	0	1	0	0
0	0	0	0	0	1	0	1	0	0	0	1	0	0	0	1	0	0
0	1	1	0	0	1	0	0	0	1	1	1	0	0	0	1	0	0
1	1	1	1	0	1	1	1	1	1	1	1	0	1	1	1	0	1
1	1	1	1	0	1	0	1	1	1	1	1	0	0	1	1	0	1
0	0	1	0	1	1	0	1	1	1	0	1	1	0	1	1	0	0
0	0	0	1	0	1	0	0	0	0	0	1	0	0	0	1	0	0
0	0	0	0	0	1	0	1	0	0	0	1	0	0	0	1	0	0
0	0	1	0	1	1	0	1	1	1	0	1	1	0	1	1	0	1
0	0	0	0	0	1	0	0	0	0	1	1	0	0	0	1	0	1
0	1	1	1	1	1	0	1	0	1	1	1	0	0	1	1	0	1
1	1	1	0	0	0	0	0	1	1	0	1	0	1	1	0	0	0
0	0	1	0	0	0	0	0	1	1	1	1	0	1	1	1	0	1
1	1	1	1	1	1	0	1	0	1	0	1	1	1	1	1	0	1
0	0	1	0	1	1	0	0	0	1	0	1	1	0	1	1	0	0
0	0	0	0	0	1	0	0	0	0	0	1	1	0	0	0	0	0
0	0	0	1	1	1	0	0	0	0	1	1	1	1	1	1	0	0
1	1	1	1	0	1	0	1	1	1	0	1	1	0	1	1	0	0
0	0	1	0	0	0	0	1	1	1	1	1	1	0	0	1	0	0
0	0	1	0	0	1	0	0	1	1	1	1	0	0	0	1	0	0
0	1	1	1	0	1	0	1	1	1	0	1	0	0	0	1	0	0
0	1	1	1	1	1	1	1	1	1	1	1	1	0	0	1	0	0
1	1	1	1	0	1	1	1	1	1	1	1	1	0	0	1	0	0
0	0	0	1	1	1	1	1	0	0	0	1	1	0	0	0	0	0
1	1	1	0	1	1	0	1	1	1	1	1	1	1	1	1	1	1
0	0	1	1	0	1	0	1	1	1	0	1	1	0	0	0	0	1
0	0	1	1	1	1	1	1	0	0	0	1	0	0	0	0	0	0
1	1	1	1	1	1	1	1	1	1	1	1	1	0	1	1	0	1
1	1	1	0	0	1	0	1	0	0	0	1	1	0	0	1	0	1
0	0	0	0	0	0	0	0	0	1	0	0	1	0	0	0	0	0
1	1	1	1	1	1	0	1	0	1	0	1	0	0	1	1	0	1
0	0	1	0	1	1	0	1	1	1	0	1	1	0	1	1	0	1
1	1	1	1	1	1	1	1	1	1	1	1	1	1	1	1	0	1
0	1	1	0	0	1	0	1	1	1	0	1	1	0	0	1	0	0
0	0	1	0	1	1	0	1	1	1	0	1	1	0	1	1	0	1
0	1	1	1	0	1	0	1	1	1	1	1	1	0	0	1	0	0
0	1	1	1	0	1	0	1	1	1	1	1	1	0	0	0	0	0
0	0	1	1	1	1	0	1	0	0	0	1	1	0	0	1	0	1
0	0	0	1	0	1	0	1	0	1	1	1	0	0	0	0	0	1
1	1	1	0	0	1	0	1	1	1	1	1	1	1	1	1	0	1
0	0	0	1	1	1	0	0	0	0	1	1	1	0	0	1	0	0
0	0	1	1	0	1	0	1	0	1	0	1	0	0	0	1	0	1
0	0	1	0	1	1	0	1	1	1	0	1	1	0	1	1	0	1
0	0	0	1	0	1	0	1	0	1	0	1	0	0	0	1	0	0
0	0	1	0	0	1	0	0	0	0	0	1	1	1	1	0	0	0
0	0	0	1	1	1	0	0	0	1	1	1	1	0	0	0	0	1
1	1	1	1	0	1	0	1	1	1	0	1	1	1	1	1	1	1
0	0	1	1	0	1	0	1	0	0	0	1	0	0	1	1	0	1
0	0	1	1	0	1	0	1	1	1	1	1	0	0	0	0	0	0
0	0	1	0	1	1	0	1	1	1	0	1	1	0	1	1	0	0
1	1	1	0	1	1	0	0	1	1	0	1	1	0	0	1	0	0
1	1	1	1	0	1	0	1	1	1	1	1	1	0	1	1	1	1
0	0	1	0	1	1	0	1	1	1	0	1	1	0	1	1	0	1
0	0	1	0	1	1	0	1	1	1	0	1	1	0	1	1	0	1
0	0	1	1	1	1	0	0	0	1	0	1	0	1	1	1	0	1
0	0	1	0	1	1	0	1	1	1	0	1	1	0	1	1	0	1
0	0	1	0	1	1	0	1	1	1	0	1	1	0	1	1	0	0
0	0	1	1	0	1	0	1	0	0	1	1	0	1	1	1	1	1
1	1	1	1	0	1	0	1	1	1	1	1	0	1	1	1	0	1
0	0	1	1	0	1	0	1	0	1	0	1	1	0	1	1	0	1
1	1	1	0	1	1	0	1	1	1	1	1	1	1	1	1	0	1
0	0	1	0	1	1	0	0	0	1	0	1	1	0	0	1	0	0
0	0	0	0	0	1	0	0	0	0	0	1	0	1	1	1	0	0
0	0	0	1	1	1	0	0	0	1	0	0	0	1	1	0	0	0
0	0	1	0	0	1	0	0	0	1	0	1	1	0	1	1	0	1
1	1	1	0	1	1	0	1	0	1	1	1	1	1	1	0	1	0
0	0	0	0	0	1	0	0	0	1	0	1	1	0	0	1	0	0
0	0	1	0	1	1	0	1	1	1	0	1	1	0	1	1	0	0
0	0	1	1	1	1	0	0	0	0	0	1	1	0	0	0	0	0
0	0	1	1	1	1	0	1	1	1	1	1	1	0	0	0	0	0
0	0	1	1	1	1	1	1	0	0	0	1	1	0	0	1	0	0
0	0	1	0	1	1	0	1	1	1	0	1	1	0	1	1	0	1
1	1	1	0	1	1	0	1	1	1	0	1	1	0	1	1	0	1
0	0	0	1	1	1	0	1	0	1	1	1	0	0	0	1	0	1
0	0	1	1	0	1	0	1	1	1	0	1	0	0	0	0	0	0
0	0	0	1	1	1	1	1	0	0	1	1	1	0	0	0	0	0
1	1	1	0	0	1	0	1	1	1	0	1	1	1	1	1	0	1
0	1	1	1	0	1	1	1	1	1	1	1	1	0	1	1	0	1
1	1	1	0	1	1	0	0	1	1	1	1	1	0	1	1	0	1
1	1	1	1	1	1	0	1	0	1	0	1	1	1	1	1	0	0
1	1	1	0	1	1	0	1	1	1	0	1	1	0	1	1	0	1
0	0	1	0	0	1	0	1	0	1	0	1	1	0	0	1	0	1
0	0	0	1	1	1	1	1	0	1	1	1	1	0	1	1	0	0
1	1	1	0	1	1	0	1	1	1	0	1	1	0	1	1	0	1
0	1	1	1	1	1	1	1	1	1	1	1	0	0	1	1	1	1
0	0	1	0	0	1	0	0	1	1	1	1	1	0	0	0	0	1
1	1	1	0	1	1	0	0	1	1	1	1	1	1	1	1	1	0
0	0	1	0	0	0	0	1	0	1	0	1	1	0	0	1	0	0
0	0	1	1	0	1	0	1	0	1	0	1	1	0	1	1	0	0
0	0	1	0	0	0	0	0	1	1	0	1	1	0	0	1	0	0
1	1	1	1	0	1	1	1	1	1	1	1	0	1	1	1	0	1
1	1	1	0	1	1	0	1	0	1	1	1	1	1	1	1	0	1
1	1	1	0	1	1	0	1	1	1	1	1	1	0	1	1	1	1
1	1	1	0	0	1	0	1	1	1	0	1	1	1	1	1	1	1
1	1	1	0	1	1	0	1	1	1	1	1	1	0	1	1	0	1
0	0	0	1	1	1	0	1	0	0	0	1	0	0	1	1	0	0
0	0	0	0	0	1	0	0	0	0	0	1	0	1	1	1	0	0
0	1	1	1	1	1	0	1	0	1	1	1	0	1	1	1	0	1
0	0	0	1	0	1	1	1	0	1	1	1	1	0	0	0	0	0
0	1	1	1	0	1	0	1	1	1	0	1	0	0	0	1	0	1
0	1	1	1	0	1	0	1	1	1	1	1	1	0	1	1	0	1
1	1	1	0	0	1	0	1	1	1	1	1	1	1	1	1	0	1
1	1	1	1	0	1	1	1	1	1	1	1	0	1	1	1	1	1
0	0	0	0	0	0	0	0	0	1	1	1	0	0	0	1	0	1
1	1	1	0	1	1	0	1	0	1	1	1	0	1	1	1	0	1
1	1	1	1	0	1	0	1	1	1	0	1	0	1	1	1	1	1
0	0	1	1	1	1	0	1	0	1	1	1	1	1	1	1	0	1
1	1	1	1	0	1	0	1	0	1	1	1	1	1	1	1	0	1
0	1	1	1	1	1	0	1	1	1	0	1	1	0	1	1	0	1
1	1	1	1	0	1	0	1	0	1	0	1	1	0	1	1	0	1
0	0	1	1	0	1	0	1	1	1	0	1	0	0	0	0	0	0
0	0	1	0	1	1	0	1	0	0	0	1	0	1	1	1	0	0
1	1	1	0	1	1	0	0	1	1	1	1	1	1	1	1	0	0
0	0	1	1	0	1	0	0	1	1	1	1	0	0	1	1	0	0
0	0	1	1	1	1	0	0	1	1	1	1	0	0	1	1	0	0
0	0	0	1	0	1	1	1	0	0	1	1	0	0	1	1	0	0
0	0	0	0	1	1	0	1	1	1	1	1	0	0	0	0	0	0
1	1	1	1	1	1	0	1	1	1	1	1	0	0	1	1	0	1
0	0	0	1	0	1	0	1	0	1	1	1	0	0	1	1	0	0
1	1	1	1	1	1	1	1	1	1	1	1	0	1	1	1	0	1
1	1	1	1	1	1	0	1	1	1	1	1	0	1	1	1	1	1
0	0	0	0	1	1	0	0	0	0	1	1	0	0	0	1	0	0
0	0	1	0	0	1	0	0	0	1	1	1	0	0	0	1	0	1
1	1	1	0	1	1	0	1	1	1	1	1	0	0	1	1	0	1
0	0	0	1	0	0	0	1	0	1	0	1	0	0	0	1	0	0
0	0	0	1	0	1	0	0	0	1	0	1	0	0	0	0	0	0
0	0	0	0	0	1	0	0	0	0	0	1	0	0	0	1	0	0
0	0	1	1	0	1	0	0	1	1	0	1	0	0	0	1	0	0
0	0	0	0	0	1	0	0	0	1	1	1	0	0	0	1	0	0
1	1	1	1	1	1	0	1	1	1	1	1	0	1	1	1	1	1
0	0	1	1	1	1	0	1	0	1	1	1	0	0	0	0	0	0
0	0	1	1	0	1	1	1	0	1	1	1	0	0	1	1	0	0
0	1	1	0	0	1	0	0	1	1	0	1	0	0	0	1	0	1
0	0	1	0	0	1	0	0	0	1	0	1	0	0	0	1	0	0
1	1	1	0	0	1	0	1	0	1	1	1	0	0	1	1	1	1
0	1	1	0	0	1	0	1	0	1	0	1	0	0	1	1	0	0
0	0	0	1	1	1	0	0	0	0	1	1	0	0	1	1	0	1
1	1	1	1	1	1	0	1	1	1	1	1	0	0	1	1	0	0
1	1	1	1	1	1	1	1	1	1	1	1	0	0	1	1	0	1
1	1	1	1	0	1	0	1	1	1	1	1	0	1	1	1	1	0
1	1	1	0	0	1	0	0	1	1	0	1	0	0	0	1	0	0
0	0	1	1	1	1	0	1	0	0	1	1	0	0	0	1	0	0
1	1	1	0	0	1	0	1	0	1	0	1	0	0	1	0	0	0
0	0	1	0	1	1	0	1	0	1	1	1	0	0	0	1	0	0
1	1	1	0	1	1	0	1	1	1	0	1	0	1	1	1	0	0
0	0	0	1	0	1	0	0	0	0	0	1	0	0	0	1	0	0
0	0	1	0	1	1	0	0	0	0	1	1	0	0	0	1	0	0
0	0	0	0	1	1	0	0	0	0	1	1	0	0	1	1	1	0
0	1	1	1	0	1	1	1	1	1	0	1	0	0	1	1	0	0
1	1	1	1	0	1	1	1	0	1	1	1	0	0	1	1	0	1
1	1	1	0	0	0	0	1	1	1	1	1	0	1	1	0	0	1
0	0	1	1	0	1	0	1	0	1	0	1	0	0	0	1	0	0
0	0	1	1	1	1	1	1	0	1	1	1	0	0	0	1	0	0
1	1	1	0	1	1	0	1	0	0	0	1	0	0	1	1	0	0
0	1	1	1	1	1	0	1	1	1	1	1	0	1	1	1	1	0
0	0	1	1	0	1	1	1	1	1	1	1	0	0	0	0	0	1
0	0	1	0	0	1	0	0	0	1	0	1	0	0	0	0	0	0
0	0	1	0	0	1	0	0	0	1	1	1	0	0	1	1	0	0
0	1	1	0	0	1	0	1	1	1	1	1	0	0	0	1	0	0
0	0	1	0	0	0	0	0	0	1	1	1	0	0	1	1	0	1
0	1	1	1	0	1	0	1	1	1	0	1	0	0	0	1	0	1
1	1	1	1	0	1	0	1	1	1	1	1	0	1	1	1	0	1
0	0	0	1	0	1	1	1	0	1	1	1	0	0	0	0	0	0
1	1	1	1	1	1	1	1	1	1	1	1	0	1	1	1	1	1
0	0	1	0	0	1	0	1	0	0	0	1	0	0	1	1	0	1
0	0	0	1	0	1	0	1	0	0	1	1	0	0	0	0	0	0
0	1	1	0	1	1	0	1	0	1	1	1	0	0	0	1	0	0
1	1	1	0	1	1	0	1	1	1	1	1	0	0	1	1	1	0
0	0	1	0	1	1	0	1	0	0	0	1	0	0	1	1	0	0
0	0	1	1	0	1	0	1	0	1	1	1	0	0	1	1	1	1
0	0	0	0	0	1	0	0	0	0	1	1	0	0	0	1	0	0
0	1	1	1	1	1	1	1	1	1	1	1	0	0	0	0	0	0
0	1	1	0	1	1	0	1	1	1	1	1	0	0	0	1	0	0
0	0	1	1	0	1	1	1	1	1	1	1	0	0	1	1	1	0
1	1	1	0	0	1	0	1	1	1	1	1	0	1	1	1	0	0
0	1	1	0	0	0	0	1	1	1	1	1	0	0	0	1	0	0
1	1	1	1	1	1	0	1	1	1	0	1	0	1	1	1	0	1
0	0	1	1	0	1	0	1	1	1	1	1	0	0	0	1	0	0
1	1	1	1	1	1	0	1	0	1	1	1	0	0	0	1	0	1
1	1	1	0	0	1	0	0	1	1	1	1	0	1	1	0	0	0
0	0	0	0	0	0	0	0	1	1	0	1	0	0	0	1	0	1
1	1	1	0	0	1	0	1	1	1	1	1	0	0	1	1	0	0
1	1	1	0	0	1	0	1	1	1	1	1	0	0	0	1	0	0
1	1	1	1	0	1	0	1	1	1	1	1	0	1	1	1	1	0
0	0	1	0	0	1	0	1	0	1	0	1	0	0	1	1	0	1
0	0	1	1	1	1	0	1	0	1	1	1	0	0	0	0	0	1
0	0	0	0	0	1	0	0	0	0	1	1	0	0	0	1	0	0
0	1	1	0	0	0	0	0	1	1	0	1	0	0	0	1	0	0
1	1	1	0	0	1	0	1	1	1	0	0	0	1	1	0	0	1
0	1	1	1	0	1	0	1	1	1	0	1	0	0	0	1	0	1
1	1	1	1	0	1	0	1	0	1	0	1	0	1	1	1	0	1
0	0	0	0	0	1	0	0	0	0	1	1	0	1	1	1	0	0
1	1	1	0	0	1	0	1	0	1	1	1	0	0	1	1	0	0
1	1	1	0	1	1	0	1	1	1	1	1	0	1	1	1	1	1
1	1	1	1	0	1	0	1	1	1	1	1	0	0	1	1	0	1
0	0	1	0	0	1	0	0	0	0	1	1	0	1	1	0	0	0
0	1	1	1	0	1	0	0	0	1	1	1	0	0	1	1	0	0
0	0	0	0	0	0	0	1	0	0	1	1	0	0	0	1	0	0
1	1	1	0	0	1	0	0	1	1	0	1	0	0	0	0	0	0
0	0	0	0	0	1	0	1	0	1	0	1	0	0	1	0	0	0
0	0	0	1	1	1	0	0	0	1	1	1	0	0	1	1	1	0
1	1	1	1	0	1	1	1	1	1	1	1	0	1	1	1	0	0
0	0	0	0	0	1	0	1	0	0	1	1	0	0	0	1	0	0
0	0	0	0	0	1	0	0	0	0	0	1	0	1	1	0	0	1
1	1	1	0	1	1	0	1	1	1	1	1	0	0	1	1	1	1
1	1	1	0	0	1	0	1	1	1	1	1	0	1	1	1	1	1
0	0	1	0	0	0	0	1	0	1	1	1	0	0	0	1	0	0
1	1	1	0	1	1	0	1	1	1	0	1	0	1	1	1	0	1
1	1	1	0	0	1	0	1	1	1	0	1	0	1	1	1	0	1
1	1	1	0	1	1	0	0	1	1	0	0	0	1	1	0	0	0
0	0	0	0	1	1	0	0	0	0	1	1	0	0	1	1	0	1
0	0	1	1	0	1	0	1	0	1	1	1	0	0	1	1	0	1
0	0	1	0	0	1	0	1	1	1	1	1	0	0	1	0	0	1
0	0	1	0	0	1	0	1	0	1	0	1	0	0	0	1	0	0
0	0	1	0	0	1	0	1	0	1	1	1	0	0	1	1	0	0
0	0	0	0	1	1	0	0	0	0	1	1	0	0	0	1	0	0
1	1	1	1	1	1	0	1	1	1	1	1	0	0	0	1	0	1
0	1	1	0	0	1	0	1	0	0	1	1	0	0	0	1	1	0
0	0	1	0	0	1	0	1	1	1	0	1	0	0	0	0	0	0
0	0	0	0	0	1	0	1	0	1	1	1	0	0	1	1	0	0
0	0	1	1	1	1	0	0	0	1	0	1	0	0	0	0	0	1
1	1	1	1	1	1	0	1	0	1	0	1	0	1	1	1	1	1
0	0	1	0	0	0	0	1	1	1	1	1	0	0	1	1	0	1
0	0	1	1	0	1	0	0	0	1	0	1	0	0	0	1	0	0
0	0	0	0	0	1	0	0	0	1	0	1	0	0	1	1	0	0
1	1	1	1	0	1	0	1	1	1	0	1	0	0	0	0	0	0
1	1	1	0	0	1	0	1	1	1	1	1	0	1	1	1	0	0
0	0	0	1	0	1	0	0	0	1	0	1	0	0	0	1	0	1
0	0	0	1	0	1	0	0	0	1	0	1	0	0	0	0	0	0
1	1	1	0	1	1	0	1	0	1	0	1	0	0	1	1	0	0
0	1	1	0	1	1	0	0	0	1	0	1	0	0	0	0	0	1
0	0	0	0	0	1	0	1	0	0	0	1	0	0	1	1	0	0
0	1	1	1	0	1	0	1	1	1	1	1	0	1	1	1	0	1
1	1	1	1	1	1	1	1	0	1	1	1	0	1	1	1	1	1
0	1	1	0	0	1	0	1	0	1	1	1	0	1	1	1	1	0
0	0	0	1	0	1	0	0	0	1	1	1	0	0	1	1	0	0
0	0	0	1	0	1	1	1	0	0	1	1	0	0	0	1	0	0
0	0	0	0	0	0	0	0	1	1	0	1	0	0	0	1	0	0
0	0	1	1	0	1	0	1	0	1	1	1	0	0	0	1	0	0
0	0	1	0	0	0	0	0	0	1	0	1	0	0	0	0	0	1
0	0	0	0	0	1	0	1	0	0	1	1	0	0	0	1	0	0
1	1	1	0	1	1	0	1	0	1	1	1	0	0	0	1	1	1
0	0	0	0	0	1	0	1	0	0	1	1	0	0	1	1	0	0
0	0	0	0	0	1	0	0	0	0	0	1	0	0	1	1	0	1
1	1	1	0	0	1	0	1	0	1	1	1	0	1	1	1	0	0
1	1	1	1	1	1	0	1	1	1	1	1	0	1	1	1	1	1
1	1	1	0	1	1	0	1	0	1	0	1	0	1	1	1	0	0
0	1	1	0	0	1	0	1	0	1	1	1	0	0	1	1	0	1
0	1	1	1	1	1	1	1	0	1	1	1	0	0	0	1	0	0
1	1	1	0	1	1	0	1	1	1	1	1	0	1	1	1	0	1
1	1	1	1	1	1	1	1	1	1	1	1	0	1	1	1	1	1
0	0	1	0	0	1	0	0	0	0	1	1	0	0	0	0	0	0
0	0	0	1	0	1	0	1	0	0	1	1	0	0	0	1	0	0
1	1	1	1	0	1	0	1	0	1	1	1	0	0	1	1	0	0
1	1	1	1	0	1	0	0	1	1	1	1	0	1	1	1	1	0
0	1	1	0	0	0	0	1	0	1	1	1	0	0	1	1	0	0
0	0	1	1	1	1	1	1	0	0	1	1	0	0	0	1	0	1
0	0	1	1	0	1	1	1	1	1	0	1	0	0	0	1	0	0
0	0	1	0	0	0	0	1	0	1	1	1	0	0	0	1	0	0
0	0	1	1	0	1	0	1	0	0	0	1	0	1	1	1	1	0
0	0	1	1	1	1	1	1	0	1	1	1	0	0	0	0	0	1
0	0	1	0	0	1	0	1	0	0	0	1	0	0	0	1	0	0
1	1	1	1	0	1	1	1	1	1	1	1	0	1	1	1	0	0
0	0	0	0	1	1	0	1	0	1	1	1	0	1	1	1	0	1
0	0	1	1	0	1	0	0	0	1	1	1	0	1	1	1	1	1
0	0	1	0	0	1	0	1	1	1	1	1	0	0	0	0	0	0
1	1	1	0	1	1	0	1	1	1	0	1	0	1	1	1	1	0
0	0	1	0	0	1	0	1	1	1	1	1	0	0	0	1	0	0
1	1	1	1	0	1	0	1	1	1	1	1	0	0	1	1	1	1
0	1	1	1	1	1	0	1	1	1	1	1	0	1	1	1	0	1
0	1	1	1	0	1	0	1	1	1	0	1	0	0	0	1	0	1
1	1	1	0	1	1	0	1	0	1	1	1	0	0	1	1	0	1
0	1	1	1	0	1	0	0	1	1	1	1	0	0	1	1	1	1
0	1	1	0	0	0	0	1	1	1	0	1	0	0	0	1	0	0
0	0	1	0	0	0	0	1	1	1	1	1	0	0	0	1	1	0
0	0	1	1	0	1	1	1	1	1	1	1	0	0	0	0	0	0
0	0	1	1	1	1	0	0	0	1	1	1	0	0	0	1	0	1
1	1	1	0	1	1	0	1	1	1	1	1	0	1	1	1	0	1
1	1	1	0	1	1	0	1	1	1	1	1	0	1	1	1	0	1
0	1	1	1	0	1	1	1	0	0	1	1	0	0	1	1	0	0
0	0	1	1	1	1	0	1	1	1	0	1	0	0	0	0	0	1
0	1	1	1	0	0	0	1	0	1	1	1	0	0	1	1	0	0
1	1	1	1	1	1	0	1	1	1	1	1	0	1	1	1	1	1
1	1	1	0	0	1	0	0	1	1	0	1	0	0	0	0	0	0
0	1	1	1	1	1	0	1	0	1	1	1	0	0	1	1	0	1
0	0	1	0	0	0	0	0	0	1	0	1	0	0	1	1	0	0
1	1	1	0	0	1	0	1	1	1	0	1	0	1	1	1	0	1
1	1	1	0	0	1	0	1	0	1	1	1	0	1	1	1	1	1
0	0	1	1	1	1	0	1	0	1	1	1	0	0	1	0	0	0
1	1	1	1	0	1	1	1	1	1	1	1	0	0	1	1	0	1
0	1	1	0	0	1	0	1	0	1	0	0	0	0	0	1	0	0
0	1	1	1	0	1	0	1	0	1	1	1	0	0	1	1	1	0
0	0	0	1	0	0	0	1	1	1	0	1	0	0	0	1	0	0
0	0	1	0	0	0	0	0	0	0	0	1	0	0	1	1	0	0
0	0	1	1	0	1	0	1	0	1	0	1	0	0	0	1	0	0
0	0	0	0	0	1	0	0	0	1	0	1	0	0	0	1	0	0
1	1	1	0	0	1	0	1	1	1	1	1	0	1	1	1	1	1
0	0	0	0	1	1	0	0	0	1	0	1	0	0	1	1	0	0
0	0	0	0	1	1	0	1	0	0	1	1	0	0	0	1	0	0
0	0	1	0	0	0	0	0	0	1	1	1	0	0	0	0	0	0
0	0	0	1	1	1	0	1	0	1	1	1	0	0	0	1	0	1
0	0	1	0	0	1	0	1	0	0	0	1	0	0	0	0	0	0
1	1	1	0	1	1	0	1	1	1	1	1	0	1	1	1	0	1
0	0	0	0	0	1	0	1	0	0	1	1	0	0	1	1	0	0
1	1	1	1	1	1	0	1	1	1	1	1	0	0	1	1	1	0
1	1	1	0	0	1	0	1	1	1	1	1	0	1	1	1	0	1
0	0	0	0	0	1	0	1	0	0	1	1	0	0	0	0	0	1
0	1	1	1	0	1	0	1	0	1	1	1	0	0	1	1	1	0
0	0	0	0	1	1	0	0	0	0	1	1	0	0	1	1	0	0
1	1	1	0	1	1	0	0	1	1	0	1	0	1	1	1	0	1
0	0	0	0	0	1	0	0	0	0	1	1	0	0	1	1	0	0
0	0	0	0	0	1	0	1	0	0	1	1	0	0	0	1	0	1
0	0	1	0	0	0	0	0	0	1	0	1	0	0	0	1	0	0
0	0	1	0	1	1	0	0	0	1	1	1	0	0	1	1	0	1
1	1	1	0	1	1	0	1	1	1	0	1	0	0	0	1	0	0
0	0	0	0	0	1	0	1	0	0	0	1	0	0	0	0	0	0
0	0	1	1	0	1	0	1	0	1	0	1	0	0	0	1	0	0
0	0	1	0	0	1	0	0	1	1	1	1	0	0	1	1	0	0
0	1	1	1	0	1	0	1	1	1	0	1	0	0	0	0	0	0
0	0	1	0	0	0	0	0	0	1	0	1	0	1	1	0	0	0
0	0	1	1	1	1	0	1	0	0	1	1	0	0	0	1	0	0
0	0	0	0	0	1	0	0	0	0	0	1	0	0	0	0	0	0
0	0	1	0	0	1	0	1	1	1	0	1	0	0	0	1	0	0
0	0	0	0	0	1	0	0	0	0	0	1	0	0	0	1	0	0
0	0	0	0	1	1	0	0	0	0	1	1	0	0	0	1	0	0
0	1	1	0	0	1	0	1	0	1	1	1	0	0	1	1	0	0
0	0	1	0	0	0	0	0	1	1	0	1	0	0	1	1	0	0
0	0	1	1	0	1	0	0	0	1	1	1	0	0	1	1	0	0
0	0	1	1	0	0	0	1	1	1	1	1	0	0	1	1	0	1
0	0	1	1	1	1	0	0	0	1	0	1	0	1	1	0	0	1
0	1	1	0	0	0	0	1	1	1	1	1	0	0	0	1	0	0
0	0	0	0	0	0	0	0	1	1	0	0	0	0	0	0	0	0
0	0	1	1	0	1	1	1	0	1	0	1	0	0	0	1	0	0
0	0	1	1	0	1	0	1	0	1	0	1	0	0	0	1	0	1
0	0	1	0	0	1	0	1	0	1	1	1	0	0	0	1	0	0
0	0	1	1	0	0	0	0	1	1	0	1	0	0	1	1	0	1
0	1	1	0	1	1	0	1	0	1	1	1	0	0	0	1	0	0
0	0	0	0	0	1	0	0	0	0	0	1	0	1	1	0	0	0
1	1	1	0	0	0	0	0	1	1	0	1	0	1	1	1	0	0
1	1	1	0	1	1	0	1	1	1	1	1	0	1	1	1	0	1
0	0	0	0	1	1	0	1	0	0	1	1	0	0	1	1	0	0
0	0	1	0	0	0	0	0	0	1	1	1	0	0	0	1	0	1
0	0	0	0	0	1	0	0	0	1	1	1	0	0	0	1	0	0
0	1	1	0	0	1	0	1	1	1	0	1	0	0	1	1	0	1
0	0	1	1	1	1	0	0	0	1	1	1	0	0	1	1	1	1
0	1	1	0	0	1	0	0	0	1	0	1	0	1	1	1	0	0
0	0	1	0	1	1	0	0	0	1	1	1	0	0	0	1	0	0
1	1	1	0	0	1	0	1	1	1	0	1	0	0	1	1	0	1
0	0	0	1	1	1	0	0	0	0	0	1	0	0	0	1	0	0
0	1	1	1	1	1	0	1	0	1	1	1	0	0	0	1	0	1
0	0	0	1	0	0	0	1	0	1	0	1	0	0	0	1	0	0
0	0	1	0	0	1	0	1	1	1	0	1	0	0	0	1	0	0
1	1	1	0	0	1	0	1	1	1	0	1	0	0	0	1	0	1
1	1	1	1	0	0	0	1	1	1	1	1	0	1	1	1	1	1
1	1	1	0	0	1	0	1	1	1	1	1	0	1	1	1	0	1
1	1	1	0	1	1	0	1	1	1	1	1	0	1	1	1	1	1
0	1	1	0	0	1	0	0	0	1	1	1	0	1	1	1	1	1
0	0	0	0	0	1	0	0	0	0	0	1	0	0	0	0	0	1
0	1	1	0	0	1	0	1	1	1	0	1	0	0	0	1	0	0
0	0	0	1	1	1	0	0	0	0	1	1	0	1	1	0	1	1
0	0	1	0	0	1	0	1	0	1	0	1	0	0	1	1	0	0
1	1	1	1	0	1	1	1	1	1	1	1	0	1	1	1	0	1
1	1	1	0	0	1	0	1	1	1	1	1	0	1	1	1	0	0
0	1	1	1	0	1	1	1	1	1	0	1	0	1	1	1	0	1
0	0	1	0	0	0	0	1	0	1	1	1	0	0	1	1	0	0
0	0	1	0	0	1	0	1	0	0	0	1	0	0	0	0	0	0
0	0	0	1	0	1	1	1	0	0	0	1	0	0	1	1	0	0
0	1	1	0	0	1	0	0	0	0	1	1	0	1	1	1	0	1
0	1	1	0	0	1	0	1	0	1	0	1	0	0	1	0	0	1
0	0	0	1	0	1	0	1	1	1	1	1	0	0	0	0	0	0
1	1	1	1	1	1	1	1	1	1	1	1	0	1	1	1	1	1
1	1	1	0	1	1	0	1	1	1	1	1	0	0	1	1	0	1
0	0	1	0	0	1	0	0	0	0	0	1	0	0	1	0	0	0
0	0	1	0	0	1	0	0	0	0	0	1	0	0	0	1	0	0
0	0	0	0	0	0	0	1	0	0	0	1	0	0	0	0	0	0
0	0	0	0	0	1	0	1	1	1	1	1	0	0	0	0	0	0
0	0	0	0	1	1	0	1	0	0	1	1	0	0	0	1	0	0
0	0	0	0	0	0	0	1	1	1	1	1	0	0	0	1	0	0
1	1	1	0	1	1	0	1	0	0	1	1	0	1	1	1	0	0
0	1	1	0	0	1	0	1	1	1	1	1	0	0	0	0	0	1
0	0	0	0	0	1	0	0	0	1	0	1	0	0	0	1	0	0
0	1	1	1	0	1	0	1	0	1	1	1	0	0	0	1	0	1
1	1	1	1	0	1	1	1	1	1	0	1	0	0	1	1	0	1
0	0	0	1	0	1	1	1	1	1	1	1	0	0	1	1	0	0
0	0	0	0	0	1	0	0	0	0	1	1	0	0	0	0	0	0
1	1	1	0	1	1	0	1	0	1	0	1	0	0	0	1	0	1
0	0	0	1	0	1	1	1	0	1	0	1	0	0	1	1	0	0
0	1	1	0	0	0	0	0	1	1	0	1	0	0	0	1	0	0
0	0	0	1	0	1	0	1	0	1	1	1	0	0	0	0	0	1
1	1	1	1	0	1	1	1	0	1	1	1	0	1	1	1	1	1
1	1	1	0	1	1	0	1	1	1	1	1	0	0	1	1	0	1
1	1	1	1	1	1	1	1	1	1	1	1	0	1	1	1	0	1
0	1	1	1	1	1	0	1	1	1	1	1	0	1	1	1	0	0
0	0	1	0	0	0	0	1	0	1	1	1	0	0	1	1	0	1
0	0	0	1	0	1	1	1	0	1	0	1	0	0	0	1	0	0
0	0	0	0	0	0	0	1	0	0	1	1	0	0	0	1	0	0
0	0	0	0	1	1	0	0	0	1	1	1	0	0	0	0	0	0
0	0	1	0	0	1	0	1	0	1	0	1	0	0	0	1	0	0
0	0	0	0	0	0	0	0	1	1	1	1	0	0	0	1	0	0
0	1	1	0	0	1	0	0	0	1	1	1	0	0	0	1	0	0
0	0	1	0	1	1	0	0	0	0	0	1	0	1	1	0	0	0
0	0	0	1	0	1	0	1	0	1	1	1	0	0	1	1	1	0
0	0	1	1	0	0	0	1	1	1	0	1	0	0	1	1	0	0
1	1	1	0	0	1	0	1	0	1	1	1	0	1	1	1	0	0
1	1	1	0	0	1	0	1	1	1	1	1	0	0	1	1	0	1
1	1	1	0	0	1	0	0	1	1	0	1	0	0	0	0	0	1
0	1	1	0	0	0	0	0	1	1	1	1	0	1	1	1	0	0
0	0	1	0	0	1	0	1	1	1	0	1	0	0	0	1	0	0
0	1	1	0	0	1	0	1	1	1	1	1	0	0	0	1	0	1
1	1	1	0	1	1	0	1	1	1	1	1	0	1	1	1	1	1
0	0	1	0	1	1	0	0	0	0	1	1	0	0	1	1	0	0
0	1	1	0	0	1	0	1	0	1	0	1	0	0	1	1	1	1
1	1	1	1	0	1	0	1	1	1	1	1	0	1	1	1	0	1
0	0	0	0	1	1	0	0	0	0	1	1	0	0	0	1	0	0
1	1	1	1	0	1	0	1	1	1	1	1	0	1	1	1	0	1
1	1	1	1	0	1	0	1	1	1	1	1	0	0	0	1	0	1
1	1	1	1	1	1	0	1	0	1	1	1	0	1	1	1	0	1
1	1	1	1	0	1	0	1	1	1	1	1	0	1	1	1	1	0
0	0	1	0	0	0	0	0	0	1	0	1	0	1	1	1	0	0
1	1	1	0	0	1	0	1	1	1	1	1	0	1	1	1	0	1
0	0	1	1	1	1	0	0	0	1	1	1	0	0	0	1	0	0
0	0	1	1	0	1	0	1	1	1	0	1	0	0	0	0	0	0
0	0	0	0	0	1	0	0	0	1	0	1	0	0	0	1	0	0
0	0	0	0	0	0	0	0	1	1	0	1	0	0	0	1	0	0
0	1	1	1	0	1	0	1	0	1	0	1	0	1	1	1	0	0
1	1	1	0	1	1	0	1	1	1	1	1	0	1	1	1	1	1
0	1	1	0	0	1	0	0	0	1	1	1	0	0	1	1	0	1
0	0	1	0	0	0	0	0	1	1	1	1	0	0	0	1	0	0
0	0	0	1	0	1	0	1	0	0	0	1	0	0	0	1	0	0
1	1	1	1	1	1	1	1	0	1	1	1	0	0	1	1	0	1
0	0	0	0	0	1	0	0	0	0	0	1	0	0	1	1	0	0
1	1	1	1	0	1	0	1	1	1	0	1	0	0	1	1	0	1
0	1	1	1	1	1	0	1	1	1	1	1	0	0	1	0	0	0
0	1	1	0	0	1	0	0	0	1	0	1	0	0	1	1	0	0
0	0	0	0	1	1	0	1	0	1	0	1	0	0	0	0	0	0
0	1	1	1	0	1	1	1	1	1	1	1	0	0	0	0	0	0
1	1	1	0	1	1	0	1	1	1	1	1	0	1	1	1	0	1
0	1	1	0	1	1	0	1	1	1	1	1	0	0	0	0	0	1
0	1	1	1	0	1	1	1	0	1	0	1	0	0	0	1	0	1
0	0	1	0	1	1	0	1	0	1	1	1	0	1	1	1	0	0
0	0	0	0	0	0	0	0	0	1	0	0	0	0	0	0	0	0
0	0	0	0	0	1	0	0	0	0	1	1	0	0	0	1	0	0
0	1	1	1	1	1	0	1	0	1	1	1	0	0	1	1	0	0
0	0	1	0	0	0	0	1	0	1	0	1	0	0	0	0	0	0
0	0	0	0	0	0	0	1	0	0	0	1	0	0	0	1	0	0
1	1	1	0	0	1	0	1	1	1	1	1	0	1	1	1	0	1
1	1	1	0	0	1	0	0	1	1	0	1	0	1	1	1	0	0
1	1	1	0	1	1	0	1	1	1	0	1	0	1	1	1	0	1
1	1	1	1	0	1	0	1	1	1	1	1	0	1	1	1	1	1
1	1	1	1	1	1	1	1	1	1	1	1	0	0	1	1	0	1
1	1	1	0	0	1	0	0	1	1	1	1	0	1	1	1	0	0
0	1	1	0	0	1	0	0	0	1	1	1	0	0	0	1	0	1
0	0	0	0	0	0	0	1	0	1	0	1	0	0	0	1	0	0
0	1	1	0	0	1	0	0	1	1	1	1	0	0	0	1	0	1
1	1	1	1	1	1	1	1	1	1	1	1	0	1	1	1	1	1
0	0	0	1	0	1	0	1	0	0	1	1	0	0	0	1	0	1
1	1	1	0	0	1	0	1	1	1	1	1	0	1	1	1	1	1
0	0	1	0	0	0	0	0	0	1	1	1	0	1	1	1	1	1
0	0	1	0	0	1	0	0	0	1	0	1	0	0	0	0	0	0
1	1	1	1	1	1	1	1	0	1	0	1	0	0	0	1	0	0
1	1	1	0	1	1	0	1	1	1	1	1	0	0	1	1	0	1
0	1	1	1	1	1	1	1	1	1	1	1	0	0	1	0	0	1
0	1	1	0	0	1	0	1	1	1	1	1	0	0	1	1	0	1
0	0	0	0	1	1	0	1	0	0	1	1	0	0	1	1	0	1
0	1	1	0	0	1	0	1	0	1	0	1	0	0	1	1	0	1
1	1	1	1	0	1	0	1	0	1	1	1	0	0	1	1	0	0
0	0	0	0	1	1	0	0	0	0	0	1	0	0	0	0	0	0
0	1	1	1	0	1	0	0	1	1	1	1	0	0	0	0	0	0
1	1	1	1	0	1	1	1	1	1	1	1	0	0	1	1	0	1
0	1	1	0	0	1	0	1	1	1	1	1	0	0	0	0	0	0
0	1	1	1	0	1	0	0	0	1	0	1	0	1	1	1	0	1
0	0	1	0	0	1	0	0	0	1	0	1	0	1	1	0	1	0
1	1	1	0	0	1	0	1	0	1	1	1	0	1	1	1	1	1
1	1	1	1	0	1	1	1	0	1	1	1	0	1	1	1	0	1
1	1	1	0	1	1	0	1	1	1	1	1	0	0	0	1	0	0
1	1	1	1	0	1	1	1	1	1	0	1	0	1	1	1	1	1
0	0	0	0	0	1	0	1	0	0	0	1	0	0	1	1	0	0
1	1	1	1	1	1	0	1	0	1	0	1	0	1	1	1	0	1
0	0	1	1	1	1	1	1	0	1	0	1	0	0	0	1	0	0
0	1	1	0	0	1	0	1	0	1	1	1	0	0	1	1	0	0
1	1	1	1	0	1	0	1	0	1	0	1	0	0	1	1	0	1
0	1	1	1	0	1	0	1	1	1	1	1	0	0	0	1	0	1
1	1	1	1	0	1	0	1	1	1	1	1	0	1	1	1	1	1
1	1	1	1	1	1	1	1	1	1	1	1	0	1	1	1	1	1
0	0	1	0	0	1	0	1	0	1	1	1	0	0	0	1	0	0
0	0	0	1	0	1	0	0	0	0	1	1	0	0	0	1	0	0
1	1	1	1	0	1	1	1	1	1	1	1	0	0	0	1	0	0
0	0	1	1	0	1	1	1	0	1	1	1	0	0	0	0	0	0
0	0	1	1	0	1	1	1	0	1	0	1	0	1	1	1	1	0
0	0	1	0	1	1	0	1	0	0	0	1	0	0	0	1	0	0
1	1	1	1	1	1	1	1	1	1	1	1	0	0	0	1	0	0
0	0	0	0	0	0	0	0	0	0	0	1	0	0	0	0	0	0
1	1	1	0	0	1	0	1	1	1	1	1	0	1	1	1	1	1
1	1	1	0	0	0	0	0	1	1	0	1	0	1	1	1	0	1
1	1	1	1	1	1	0	1	1	1	1	1	0	1	1	0	1	0
0	0	1	0	0	0	0	0	0	1	0	1	1	0	1	1	0	1
0	1	1	1	1	1	0	1	1	1	1	1	1	0	0	0	0	0
0	0	1	0	0	1	0	0	0	1	1	1	1	0	0	1	0	0
1	1	1	1	1	1	0	1	1	1	1	1	1	1	1	1	1	1
0	0	1	1	0	1	0	1	1	1	1	1	1	0	0	0	0	0
1	1	1	1	0	1	1	1	1	1	0	1	1	1	1	1	1	1
1	1	1	1	1	1	1	1	1	1	1	1	1	1	1	1	0	0
0	0	1	0	0	1	0	0	0	0	1	1	1	0	0	1	0	1
1	1	1	0	1	1	0	1	1	1	1	1	1	1	1	1	1	1
0	0	0	1	0	1	0	1	0	0	1	1	1	0	0	1	0	0
0	0	0	1	0	1	1	1	1	1	1	1	0	0	0	0	0	0
1	1	1	1	1	1	0	1	1	1	1	1	0	0	1	1	1	0
1	1	1	1	1	1	1	1	1	1	1	1	1	0	1	1	0	1
1	1	1	1	1	1	1	1	1	1	1	1	1	1	1	1	0	1
0	0	1	0	0	0	0	0	0	1	0	0	1	0	0	0	0	0
1	1	1	0	0	1	0	1	1	1	0	1	1	0	0	1	0	1
0	0	1	1	0	0	1	1	1	1	0	1	1	0	0	0	0	0
1	1	1	1	1	1	0	1	1	1	0	1	0	0	0	0	0	0
1	1	1	1	0	1	0	1	1	1	0	1	1	1	1	1	1	1
0	0	1	1	0	1	0	1	0	1	0	1	1	0	0	1	0	1
1	1	1	0	1	1	0	1	1	1	1	1	1	0	1	1	0	0
0	0	0	0	0	0	0	0	0	1	1	1	1	0	0	0	0	0
1	1	1	1	1	1	0	1	0	1	1	1	0	1	1	1	0	1
0	0	0	0	0	0	0	0	0	0	1	1	0	1	1	1	1	0
0	0	1	1	0	1	1	1	1	1	1	1	1	0	0	0	0	1
1	1	1	1	0	1	0	1	1	1	0	1	1	1	1	1	0	1
0	0	1	0	0	1	0	1	0	1	1	1	1	0	1	1	0	1
0	0	0	1	0	1	0	1	0	0	0	1	1	0	0	1	0	0
1	1	1	1	0	1	1	1	1	1	1	1	1	1	1	1	0	1
1	1	1	1	0	1	0	1	1	1	1	1	1	0	0	1	0	1
1	1	1	0	0	1	0	0	1	1	1	1	0	0	1	1	1	0
0	1	1	0	0	1	0	1	1	1	1	1	1	0	1	1	0	0
0	0	1	0	0	1	0	0	0	1	1	1	1	0	0	0	0	0
0	0	1	0	1	1	0	0	0	0	0	1	0	1	1	0	0	0
1	1	1	0	0	1	0	1	1	1	1	1	1	0	0	1	0	1
1	1	1	1	0	1	0	1	0	1	1	1	1	0	1	1	0	1
0	0	1	1	0	1	0	0	0	1	1	1	1	0	0	1	0	1
0	1	1	0	0	1	0	1	0	0	0	1	1	1	1	1	0	1
1	1	1	1	1	1	0	1	1	1	1	1	1	0	1	1	0	1
0	0	1	0	1	1	0	1	1	1	0	1	1	0	1	1	0	0
1	1	1	1	1	1	0	1	1	1	0	1	1	1	1	1	1	1
0	0	1	0	0	0	0	0	1	1	1	1	0	1	1	1	0	0
1	1	1	1	0	1	0	1	1	1	1	1	1	0	1	1	0	1
1	1	1	0	1	1	0	1	1	1	0	1	1	1	1	1	0	1
0	1	1	0	1	1	0	1	0	1	1	1	1	1	1	1	1	0
1	1	1	0	0	1	0	1	1	1	1	1	1	1	1	1	1	1
1	1	1	1	1	1	0	1	1	1	1	1	1	1	1	1	0	1
0	0	1	1	0	1	1	1	0	1	0	1	1	0	0	1	0	0
1	1	1	0	1	1	0	1	1	1	1	1	1	0	0	1	0	1
1	1	1	1	0	1	0	1	1	1	0	1	1	0	1	1	0	1
0	0	0	0	0	1	0	0	0	0	1	1	1	0	1	1	0	0
0	0	1	0	0	0	0	1	1	1	1	1	0	0	1	1	0	1
0	0	1	0	0	1	0	0	0	0	1	1	1	0	1	1	0	0
0	0	1	1	0	1	0	1	0	1	1	1	0	0	0	0	0	0
1	1	1	1	1	1	0	1	1	1	1	1	0	1	1	1	1	1
1	1	1	1	0	1	0	1	1	1	1	1	0	1	1	1	1	0
0	0	1	0	0	1	0	1	0	0	1	1	1	0	0	0	0	0
1	1	1	0	1	1	0	1	0	1	1	1	1	1	1	1	0	1
1	1	1	1	0	1	1	1	1	1	1	1	1	0	1	1	0	0
0	0	1	1	0	1	0	1	0	1	1	1	1	1	1	1	1	1
1	1	1	0	0	1	0	1	0	1	0	1	1	1	1	1	0	0
0	0	1	1	0	1	0	0	0	1	0	1	1	0	0	1	0	0
0	0	0	0	0	1	0	1	1	1	1	1	1	0	0	0	0	0
1	1	1	0	1	1	0	1	1	1	1	1	1	1	1	1	1	0
1	1	1	0	0	1	0	1	0	1	1	1	0	1	1	1	1	1
0	0	0	1	1	1	1	1	0	1	1	1	1	0	0	0	0	0
1	1	1	1	0	1	0	1	1	1	1	1	1	1	1	1	1	1
0	0	0	0	0	1	0	1	0	0	1	1	1	0	1	1	1	0
1	1	1	0	0	1	0	1	1	1	1	1	1	1	1	1	0	1
1	1	1	1	1	1	0	1	1	1	0	1	1	1	1	1	1	1
1	1	1	1	0	1	0	1	1	1	0	1	1	0	1	1	0	0
0	1	1	1	0	1	1	1	1	1	0	1	1	0	0	0	0	1
1	1	1	0	1	1	0	0	1	1	0	1	1	1	1	1	1	1
1	1	1	1	0	1	0	1	1	1	1	1	0	1	1	1	0	0
0	0	0	1	0	1	0	1	0	1	1	1	1	0	0	1	0	0
0	0	1	1	1	1	0	0	0	1	1	1	1	0	1	1	1	1
1	1	1	1	0	1	0	1	1	1	1	1	1	0	1	1	0	1
1	1	1	1	0	1	1	1	1	1	1	1	1	1	1	1	1	1
0	1	1	1	1	1	0	1	1	1	1	1	1	0	0	0	0	1
1	1	1	0	0	0	0	1	1	1	0	1	1	1	1	1	1	1
0	0	0	0	1	1	0	1	0	0	1	1	1	0	0	0	0	0
0	1	1	0	0	1	0	0	0	1	1	1	1	0	0	1	0	0
1	1	1	0	0	1	0	1	1	1	0	1	1	1	1	1	0	1
0	1	1	1	0	1	0	1	1	1	0	1	1	1	1	1	0	1
1	1	1	1	1	1	0	1	1	1	0	1	1	1	1	1	0	0
0	0	0	0	0	0	0	0	0	1	0	1	1	0	0	1	0	0
0	0	0	0	0	1	0	0	0	0	1	1	1	0	0	1	0	1
0	0	1	0	1	1	0	1	0	1	1	1	1	0	0	1	0	1
1	1	1	1	0	1	0	1	0	1	1	1	1	1	1	1	0	1
1	1	1	1	1	1	1	1	1	1	1	1	1	1	1	1	0	1
0	0	0	1	1	1	0	0	0	0	1	1	1	0	0	0	0	1
0	0	0	1	0	1	0	1	0	1	0	1	1	0	0	1	0	0
0	1	1	0	1	1	0	1	1	1	0	1	0	0	0	1	0	0
1	1	1	0	0	1	0	0	1	1	1	1	0	0	0	1	0	1
0	0	1	0	0	1	0	1	1	1	0	1	1	0	0	1	0	0
0	0	0	0	1	1	0	1	0	0	1	1	1	0	0	1	0	0
1	1	1	0	0	1	0	1	1	1	1	1	0	0	1	1	0	1
0	0	1	0	0	1	0	1	1	1	1	1	0	0	0	0	0	0
1	1	1	0	0	1	0	1	1	1	1	1	1	1	1	1	1	0
0	0	1	1	0	1	1	1	1	1	1	1	1	0	0	0	0	1
0	1	1	1	0	1	0	1	1	1	1	1	1	0	0	0	0	0
1	1	1	0	1	1	0	0	1	1	1	1	0	1	1	1	0	1
1	1	1	0	0	1	0	1	1	1	1	1	1	1	1	1	1	1
0	0	0	0	0	0	0	0	1	1	0	1	1	1	1	0	0	0
1	1	1	1	1	1	0	1	0	1	1	1	1	1	1	1	1	1
1	1	1	0	0	0	0	1	0	1	1	1	1	1	1	1	1	1
0	0	0	0	0	1	0	1	0	0	1	1	1	0	0	0	0	0
0	1	1	0	0	1	0	1	1	1	1	1	1	1	1	1	0	1
0	0	0	0	1	1	0	0	0	0	1	1	1	0	0	1	0	0
0	0	1	0	0	1	0	1	1	1	1	1	0	0	0	1	0	0
1	1	1	1	1	1	1	1	1	1	1	1	0	0	1	1	1	0
1	1	1	1	0	1	1	1	1	1	1	1	1	0	1	1	0	1
1	1	1	1	1	1	1	1	0	1	1	1	1	1	1	1	1	1
1	1	1	1	1	1	1	1	1	1	1	1	1	0	1	1	0	1
1	1	1	1	0	1	1	1	1	1	1	1	1	1	1	1	1	1
1	1	1	1	1	1	0	1	1	1	0	1	1	1	1	1	1	0
0	1	1	0	0	1	0	1	1	1	0	1	1	0	0	1	0	0
0	0	0	1	0	1	0	1	0	0	1	1	1	0	0	1	0	1
1	1	1	0	1	1	0	1	0	1	1	1	1	1	1	1	1	1
0	0	1	0	0	0	0	1	0	1	0	1	0	0	0	1	0	0
1	1	1	1	1	1	1	1	1	1	1	1	1	1	1	1	1	1
0	0	0	1	0	1	0	0	0	1	1	1	1	0	0	1	0	0
1	1	1	1	1	1	0	1	0	1	1	1	1	0	1	1	0	0
0	0	0	1	1	1	1	1	1	1	1	1	1	0	0	0	0	0
1	1	1	0	0	1	0	1	1	1	1	1	1	0	1	1	0	1
0	1	1	1	0	1	0	1	1	1	0	1	1	0	0	1	0	1
0	0	1	1	0	1	0	1	0	1	0	1	1	0	0	1	0	1
1	1	1	1	0	1	0	1	1	1	1	1	1	0	1	1	1	1
1	1	1	0	0	0	0	0	1	1	0	1	0	1	1	1	0	0
0	1	1	1	0	1	1	1	1	1	1	1	0	0	0	0	0	0
1	1	1	0	0	1	0	1	1	1	1	1	1	1	1	1	0	1
1	1	1	1	0	1	1	1	0	1	1	1	1	0	1	1	1	1
0	0	0	0	0	1	0	1	0	0	0	1	1	1	1	0	0	1
1	1	1	0	1	1	0	1	0	1	0	1	1	1	1	1	0	1
1	1	1	0	0	1	0	1	1	1	0	1	1	0	0	1	0	0
1	1	1	0	1	1	0	1	1	1	1	1	1	0	1	1	1	1
1	1	1	1	1	1	0	1	1	1	1	1	1	1	1	1	1	1
0	0	1	0	0	0	0	1	1	1	1	1	0	0	1	1	1	0
0	0	1	0	0	1	0	1	0	0	0	1	1	0	1	1	0	0
0	1	1	0	0	1	0	1	1	1	0	1	0	0	1	1	0	0
1	1	1	1	0	1	1	1	1	1	1	1	1	1	1	1	0	1
1	1	1	1	0	1	0	1	1	1	0	1	1	0	1	1	1	1
1	1	1	1	1	1	0	1	1	1	0	1	1	1	1	1	1	1
0	0	1	1	0	1	0	1	1	1	1	1	0	0	1	1	0	0
0	1	1	0	0	1	0	1	1	1	1	1	0	0	1	1	0	1
1	1	1	0	1	1	0	1	1	1	0	1	1	0	0	0	0	1
0	0	1	1	0	1	1	1	0	1	0	1	1	0	0	0	0	1
1	1	1	0	1	1	0	1	1	1	1	1	1	1	1	1	0	1
0	0	0	1	1	1	1	1	1	1	1	1	1	0	0	0	0	1
0	0	0	0	1	1	0	0	0	0	0	1	1	1	1	0	1	1
1	1	1	0	1	1	0	1	1	1	1	1	1	1	1	1	0	1
0	0	0	0	1	1	0	0	0	0	1	1	1	0	0	1	0	1
0	0	1	1	0	1	0	1	1	1	0	1	0	0	0	1	0	0
1	1	1	1	1	1	0	1	1	1	1	1	0	1	1	1	0	1
1	1	1	0	1	1	0	1	1	1	1	1	0	1	1	1	1	1
1	1	1	0	0	1	0	1	1	1	1	1	1	1	1	1	1	1
1	1	1	1	1	1	1	1	0	1	1	1	0	1	1	1	0	1
0	1	1	0	0	1	0	1	1	1	1	1	1	0	1	1	1	1
0	0	0	1	0	1	0	1	0	1	0	1	0	0	1	1	0	1
0	0	1	1	0	0	0	1	1	1	0	1	1	0	0	0	0	1
1	1	1	1	0	1	1	1	1	1	0	1	1	0	1	1	0	1
0	1	1	1	1	1	0	1	1	1	1	1	0	0	0	0	0	1
1	1	1	1	0	1	0	1	1	1	0	1	1	1	1	1	1	1
1	1	1	1	0	1	1	1	1	1	1	1	1	1	1	1	1	1
1	1	1	1	0	1	0	1	1	1	1	1	1	0	0	1	0	1
0	0	1	0	0	0	0	0	1	1	0	1	1	0	1	1	0	1
0	1	1	1	0	1	0	1	1	1	0	1	1	0	0	1	0	1
0	1	1	1	0	1	1	1	1	1	1	1	1	0	1	1	0	1
0	0	1	1	1	1	0	1	1	1	0	1	1	0	0	1	0	1
0	1	1	0	0	1	0	1	0	1	1	1	1	0	0	1	0	0
1	1	1	0	1	1	0	1	1	1	1	1	1	1	1	1	1	1
0	0	1	0	0	1	0	1	0	1	0	0	1	0	0	1	0	0
0	1	1	1	0	1	1	1	1	1	1	1	1	0	0	0	0	0
1	1	1	1	1	1	1	1	0	1	1	1	0	0	0	1	1	1
1	1	1	1	0	1	1	1	1	1	0	1	1	1	1	1	1	1
1	1	1	1	0	1	1	1	1	1	1	1	1	1	1	1	0	1
0	0	0	0	1	1	0	0	0	0	1	1	1	0	0	1	0	1
0	0	1	1	0	1	0	0	0	1	0	1	1	0	0	1	0	1
1	1	1	1	1	1	0	1	1	1	1	1	1	0	1	1	1	1
0	0	1	1	0	1	1	1	1	1	1	1	1	1	1	1	0	1
1	1	1	0	0	1	0	1	1	1	1	1	1	1	1	1	1	1
1	1	1	0	1	1	0	1	0	1	0	1	1	0	1	1	0	1
0	1	1	1	1	1	0	1	0	1	1	1	0	0	1	1	0	0
1	1	1	0	1	1	0	1	1	1	1	1	1	0	0	1	0	1
1	1	1	0	1	1	0	1	1	1	1	1	1	1	1	1	1	1
0	0	1	1	1	1	1	1	1	1	1	1	1	0	0	0	0	1
0	1	1	0	0	1	0	1	1	1	0	1	1	0	0	1	0	1
0	1	1	1	0	1	0	1	0	1	1	1	1	0	1	1	0	0
1	1	1	1	1	1	1	1	1	1	1	1	1	0	1	1	1	1
0	1	1	0	1	1	0	0	0	0	0	1	1	0	1	1	0	1
1	1	1	1	1	1	0	1	1	1	0	1	1	1	1	1	0	1
0	0	0	1	0	1	0	0	0	0	0	1	1	0	1	1	0	0
0	0	1	1	0	1	0	1	1	1	1	1	0	0	0	1	0	1
1	1	1	0	0	1	0	1	1	1	1	1	0	1	1	1	0	1
0	0	1	1	0	1	1	1	0	1	1	1	0	0	0	1	0	0
0	0	1	0	1	1	0	1	1	1	0	1	1	0	1	1	0	1
1	1	1	0	1	1	0	1	0	0	0	1	1	1	1	1	0	1
0	1	1	1	0	1	1	1	1	1	1	1	1	0	0	1	0	0
1	1	1	0	0	1	0	1	1	1	1	1	0	0	1	1	1	1
1	1	1	1	0	1	0	1	1	1	1	1	1	1	1	1	0	1
0	0	1	0	1	1	0	1	0	1	1	1	1	1	1	1	1	1
1	1	1	0	0	1	0	0	1	1	1	1	1	1	1	1	1	1
0	1	1	1	1	1	1	1	0	1	1	1	1	1	1	1	0	1
0	0	0	1	0	1	0	1	0	1	1	1	1	0	0	0	0	1
1	1	1	1	1	1	0	1	1	1	1	1	0	1	1	1	1	1
1	1	1	0	1	1	0	1	1	1	1	1	0	1	1	1	1	1
1	1	1	1	1	1	1	1	1	1	1	1	1	0	1	1	0	0
1	1	1	1	1	1	1	1	1	1	0	1	1	0	1	1	0	1
1	1	1	0	1	1	0	1	1	1	0	1	1	0	1	1	0	1
1	1	1	1	1	1	0	1	1	1	1	1	1	1	1	1	1	1
1	1	1	0	1	1	0	0	1	1	0	1	1	1	1	1	0	1
1	1	1	1	1	1	1	1	1	1	1	1	1	1	1	1	0	1
0	1	1	1	0	1	1	1	1	1	0	1	1	1	1	1	0	1
1	1	1	1	1	1	1	1	1	1	1	1	1	1	1	1	1	1
0	0	1	1	1	1	1	1	1	1	1	1	0	0	1	1	0	1
0	0	1	0	0	0	0	0	1	1	0	1	1	0	0	1	0	0
0	1	1	1	0	1	0	1	1	1	1	1	0	0	1	1	1	1
1	1	1	1	0	1	0	0	0	1	0	1	0	1	1	1	1	0
0	0	0	1	0	1	1	1	1	1	1	1	1	0	0	0	0	0
1	1	1	0	0	1	0	1	1	1	0	1	1	0	1	1	0	0
0	1	1	1	0	1	0	0	0	1	0	1	1	0	1	1	0	1
0	0	0	1	1	1	0	1	0	0	0	1	0	0	0	1	0	0
1	1	1	0	1	1	0	1	1	1	1	1	1	0	1	1	0	1
0	1	1	0	0	1	0	1	0	0	1	1	1	1	1	1	1	0
0	1	1	0	0	1	0	1	0	1	0	1	1	0	0	1	0	1
1	1	1	1	1	1	1	1	1	1	1	1	0	1	1	1	1	1
1	1	1	1	1	1	1	1	1	1	1	1	1	0	1	1	0	1
0	0	1	1	1	1	0	1	0	0	1	1	1	0	0	1	0	1
0	0	0	0	0	1	0	1	0	0	1	1	1	0	1	1	0	0
0	0	1	1	0	1	0	1	1	1	1	1	1	0	1	1	0	0
1	1	1	1	0	1	0	1	1	1	1	1	1	1	1	1	0	1
0	0	1	1	0	1	1	1	1	1	1	1	0	0	0	1	0	1
0	1	1	1	0	0	0	1	1	1	1	1	1	0	1	1	0	1
1	1	1	0	1	1	0	1	0	1	1	1	1	1	1	1	0	1
1	1	1	0	0	1	0	1	0	1	1	1	1	0	1	1	0	0
0	0	1	0	0	1	0	1	0	1	0	1	0	0	0	1	0	0
1	1	1	1	1	1	1	1	1	1	1	1	1	1	1	1	0	1
1	1	1	0	1	1	0	1	1	1	1	1	1	0	0	1	0	1
0	0	1	0	1	1	0	1	1	1	0	1	1	0	1	1	0	0
0	1	1	1	1	1	1	1	1	1	1	1	0	1	1	1	0	1
1	1	1	1	0	1	1	1	1	1	0	1	1	1	1	1	0	1
1	1	1	1	0	1	1	1	1	1	1	1	1	0	1	1	0	1
0	0	0	0	0	0	0	0	1	1	0	1	1	0	0	1	0	0
0	0	1	0	1	1	0	1	0	0	1	1	1	0	1	1	0	0
0	0	1	0	1	1	0	1	0	1	1	1	1	0	1	0	0	1
0	1	1	1	0	1	1	1	0	1	1	1	1	1	1	1	1	0
1	1	1	1	0	1	1	1	1	1	1	1	1	1	1	1	1	0
1	1	1	1	1	1	1	1	1	1	1	1	1	1	1	1	1	0
0	0	1	0	0	1	0	1	0	1	0	1	1	0	1	1	0	1
0	0	1	0	1	1	0	1	1	1	0	1	1	0	1	1	0	1
1	1	1	1	1	1	1	1	1	1	1	1	1	1	1	1	1	1
0	0	1	0	1	1	0	1	1	1	0	1	1	0	1	1	0	1
1	1	1	1	1	1	1	1	1	1	1	1	0	0	1	1	0	1
1	1	1	1	0	1	0	1	1	1	1	1	1	1	1	1	0	1
1	1	1	1	1	1	1	1	1	1	1	1	1	1	1	1	1	1
0	0	1	1	0	0	0	1	0	1	1	1	1	0	1	1	1	1
1	1	1	0	0	1	0	1	1	1	1	1	1	0	0	1	0	1
0	0	0	1	0	1	0	0	0	0	1	1	1	0	1	1	0	0
0	0	1	1	0	1	0	1	0	0	1	1	0	0	1	1	0	0
1	1	1	0	0	1	0	1	1	1	0	1	1	0	1	1	0	1
0	0	1	0	0	0	0	0	1	1	0	0	1	0	0	0	0	1
0	0	0	0	1	1	0	1	0	1	1	1	1	1	1	1	1	0
1	1	1	0	0	1	0	1	1	1	0	1	1	1	1	1	0	1
1	1	1	0	1	1	0	1	1	1	1	1	0	0	1	1	1	1
0	1	1	0	1	1	0	1	0	1	0	1	1	0	1	1	0	1
0	0	1	0	1	1	0	1	1	1	0	1	1	0	1	1	0	0
1	1	1	1	0	1	0	1	1	1	1	1	1	0	1	1	0	1
0	0	1	0	1	1	0	1	1	1	0	1	1	0	1	1	0	1
0	0	1	1	0	1	0	1	0	1	0	1	0	0	0	0	0	1
1	1	1	1	1	1	0	1	1	1	1	1	1	0	1	1	0	1
1	1	1	0	1	1	0	1	1	1	0	1	0	0	0	1	0	1
0	1	1	0	1	1	0	1	0	1	0	1	1	0	1	1	0	1
0	0	1	1	0	1	1	1	0	1	1	1	1	0	0	0	0	0
1	1	1	0	1	1	0	1	1	1	1	1	1	0	1	1	0	1
1	1	1	0	1	1	0	1	1	1	1	1	1	1	1	1	0	1
1	1	1	1	1	1	0	1	1	1	1	1	1	1	1	1	1	1
1	1	1	0	0	1	0	1	1	1	1	1	1	0	1	1	0	1
1	1	1	1	0	1	1	1	1	1	0	1	1	1	1	1	0	1
1	1	1	0	1	1	0	0	1	1	0	1	1	0	0	0	0	1
0	0	0	1	1	1	0	0	0	0	1	1	1	0	1	1	0	0
1	1	1	0	0	1	0	1	1	1	0	1	0	1	1	1	0	1
1	1	1	0	1	1	0	1	1	1	1	1	1	0	0	1	0	1
1	1	1	0	1	1	0	1	1	1	1	1	0	0	0	1	1	1
1	1	1	0	0	1	0	1	1	1	0	1	1	0	0	0	0	1
1	1	1	1	0	1	0	1	1	1	1	1	1	1	1	1	1	1
0	1	1	1	0	1	0	1	1	1	1	1	0	1	1	1	1	1
1	1	1	0	1	1	0	1	1	1	1	1	1	1	1	1	0	1
1	1	1	1	0	1	1	1	1	1	1	1	0	1	1	1	0	1
0	0	1	1	1	1	1	1	1	1	1	1	0	0	0	0	0	0
0	0	1	0	0	1	0	1	1	1	1	1	1	0	1	1	0	1
1	1	1	0	0	0	0	0	1	1	0	1	1	1	1	0	0	0
1	1	1	1	1	1	0	1	1	1	1	1	1	1	1	1	0	1
1	1	1	0	1	1	1	1	1	1	1	1	1	1	1	1	1	1
1	1	1	0	1	1	0	1	1	1	1	1	1	1	1	1	1	1
1	1	1	1	1	1	0	1	1	1	1	1	1	1	1	1	1	1
0	0	1	0	0	1	0	1	0	0	0	1	0	0	1	1	0	0
0	0	1	0	0	1	0	1	0	1	1	1	1	0	1	1	0	1
0	1	1	1	1	1	1	1	1	1	1	1	0	0	1	1	0	1
0	0	0	1	1	1	1	1	0	1	1	1	1	0	0	1	1	0
1	1	1	1	0	1	0	1	1	1	1	1	1	1	1	1	0	1
0	0	1	0	0	1	0	0	0	0	1	1	1	0	1	1	0	1
0	0	0	0	1	1	0	0	0	0	0	1	1	0	1	1	0	1
0	1	1	0	0	1	0	1	1	1	1	1	1	0	1	1	0	1
0	0	1	1	0	1	1	1	0	1	1	1	0	1	1	1	1	0
0	0	1	0	1	1	0	1	1	1	0	1	1	0	1	1	0	1
1	1	1	0	0	1	0	1	1	1	1	1	0	0	0	1	0	1
0	0	1	0	0	1	0	1	0	1	1	1	1	0	1	1	0	1
1	1	1	0	0	1	0	0	0	1	0	1	1	1	1	1	0	1
1	1	1	1	0	1	0	1	1	1	1	1	1	1	1	1	0	0
0	0	1	1	1	1	1	1	1	1	0	1	1	0	0	0	0	1
1	1	1	1	0	1	1	1	0	1	1	1	1	1	1	1	1	0
1	1	1	0	0	1	0	1	1	1	1	1	1	0	1	1	0	1
0	0	0	1	0	1	0	0	0	1	0	1	0	0	0	0	0	0
0	1	1	1	1	1	0	0	1	1	1	1	1	0	0	1	0	1
0	0	1	0	1	1	0	1	1	1	0	1	1	0	1	1	0	1
0	1	1	1	1	1	1	1	1	1	0	1	0	0	0	1	0	1
1	1	1	1	1	1	0	1	1	1	0	1	1	1	1	1	0	1
1	1	1	0	1	1	0	1	1	1	1	1	1	1	1	1	1	1
0	0	1	0	1	1	0	0	0	0	1	1	1	1	1	1	1	0
1	1	1	1	1	1	1	1	1	1	1	1	0	1	1	1	1	1
1	1	1	0	0	1	0	1	1	1	1	1	0	1	1	1	1	1
1	1	1	0	0	1	0	1	1	1	1	1	1	0	0	1	0	1
1	1	1	0	0	1	0	1	0	1	0	1	1	0	1	1	0	1
0	1	1	1	0	1	0	1	1	1	1	1	1	0	1	1	0	1
0	1	1	1	0	1	0	1	0	1	1	1	1	1	1	1	1	1
0	0	1	1	0	1	0	1	1	1	0	1	1	0	0	1	0	0
1	1	1	1	0	1	1	1	0	1	0	1	1	0	1	1	0	1
1	1	1	1	1	1	1	1	1	1	0	1	0	1	1	1	0	1
1	1	1	1	1	1	0	0	0	1	1	1	0	1	1	1	0	1
0	0	0	1	0	1	0	1	0	1	1	1	1	0	0	1	0	1
0	0	0	1	0	1	0	1	0	0	0	1	1	0	1	1	0	0
0	0	1	1	0	1	1	1	0	1	1	1	0	1	1	1	1	0
1	1	1	1	1	1	1	1	1	1	1	1	1	1	1	1	0	1
0	0	1	0	1	1	0	1	0	0	1	1	1	1	1	1	0	0
0	0	1	0	1	1	0	1	1	1	0	1	1	0	1	1	0	0
0	0	0	1	1	1	1	1	0	1	0	1	1	0	1	1	0	0
0	0	1	1	0	0	0	1	1	1	1	1	0	0	1	1	1	0
0	1	1	1	1	1	0	1	0	1	1	1	1	1	1	1	0	1
1	1	1	0	0	1	0	1	1	1	0	1	1	0	1	1	0	1
1	1	1	0	0	1	0	1	1	1	1	1	1	0	1	1	0	1
1	1	1	1	0	1	0	1	1	1	0	1	0	1	1	1	0	1
1	1	1	0	0	1	0	1	1	1	1	1	1	1	1	1	1	1
1	1	1	1	1	1	0	1	1	1	1	1	1	1	1	1	1	1
1	1	1	0	0	1	0	1	1	1	1	1	1	1	1	1	1	1
1	1	1	1	0	1	0	1	1	1	0	1	1	1	1	1	1	1
0	1	1	0	0	0	0	0	1	1	1	1	0	1	1	1	0	1
0	0	1	0	1	1	0	1	1	1	0	1	1	0	1	1	0	1
1	1	1	1	1	1	1	1	1	1	1	1	1	1	1	1	1	1
1	1	1	0	0	1	0	1	1	1	0	1	1	1	1	1	1	1
1	1	1	1	0	1	1	1	1	1	1	1	1	0	1	1	0	1
0	0	1	0	0	0	0	1	1	1	1	1	0	0	0	1	0	0
0	1	1	0	0	0	0	0	1	1	0	1	1	1	1	1	0	1
1	1	1	0	0	1	0	0	1	1	0	1	1	0	0	1	0	1
0	1	1	1	0	1	0	0	1	1	0	1	1	1	1	1	1	1
1	1	1	1	1	1	1	1	0	1	1	1	1	0	1	1	0	1
1	1	1	0	0	1	0	1	1	1	1	1	0	1	1	1	0	1
1	1	1	1	0	1	0	1	1	1	1	1	1	1	1	1	0	1
0	0	1	1	1	1	0	0	0	0	1	1	1	0	1	1	1	1
1	1	1	0	0	1	0	1	1	1	1	1	1	1	1	1	0	1
0	0	0	0	1	1	0	1	0	0	1	1	0	0	1	1	0	0
1	1	1	0	0	1	0	1	1	1	0	1	1	1	1	1	0	1
1	1	1	1	1	1	0	1	1	1	1	1	1	1	1	1	0	1
1	1	1	1	1	1	1	1	1	1	1	1	0	0	1	1	0	1
1	1	1	1	1	1	0	1	1	1	1	1	1	0	1	1	0	1
1	1	1	0	0	1	0	1	0	1	0	1	1	1	1	1	0	1
0	1	1	0	0	1	0	1	0	0	1	1	1	0	1	1	0	0
0	1	1	1	1	1	0	1	0	1	1	1	1	0	1	1	1	1
1	1	1	0	1	1	0	1	1	1	1	1	1	0	1	1	0	1
0	1	1	0	1	1	0	0	0	1	1	1	1	0	1	1	0	1
1	1	1	0	1	1	0	1	1	1	1	1	1	1	1	1	0	1
0	0	0	1	0	1	1	1	0	1	1	1	0	0	0	0	0	0
1	1	1	0	1	1	0	1	1	1	1	1	1	1	1	1	1	1
1	1	1	1	1	1	0	1	1	1	0	1	1	0	1	1	0	1
0	0	0	1	0	1	1	1	0	0	1	1	1	0	1	1	0	0
0	0	0	0	0	1	0	1	0	1	1	1	1	0	0	0	0	0
0	0	1	0	0	0	0	0	1	1	1	1	0	0	0	1	0	0
1	1	1	1	1	1	1	1	1	1	1	1	1	1	1	1	0	0
0	0	0	1	1	1	0	0	0	1	1	1	1	0	0	1	0	0
1	1	1	1	1	1	0	1	1	1	1	1	1	1	1	1	0	0
0	0	1	1	0	1	0	0	1	1	0	1	1	0	0	1	0	0
0	0	0	0	0	1	0	1	0	0	0	1	1	0	0	1	0	0
0	0	0	1	0	1	0	0	0	0	1	1	1	0	1	1	0	0
1	1	1	1	0	1	0	1	0	1	1	1	1	1	1	1	1	0
0	0	1	0	0	1	0	1	0	1	1	1	0	1	1	1	0	0
1	1	1	1	1	1	0	1	1	1	1	1	1	1	1	1	1	0
0	0	0	1	0	1	0	1	1	1	1	1	0	0	0	0	0	0
0	0	0	0	0	1	0	1	0	1	0	1	0	0	0	0	0	0
0	1	1	1	1	1	0	1	0	1	0	1	0	0	1	1	0	0
0	1	1	0	1	1	0	1	0	1	0	1	0	0	1	1	0	1
0	0	1	0	0	1	0	0	1	1	1	1	0	0	0	1	0	1
0	0	0	0	0	1	0	0	0	0	0	1	0	0	1	1	0	0
0	0	1	1	0	1	1	1	0	1	1	1	0	0	1	1	0	0
0	0	1	0	1	1	0	1	1	1	0	1	1	0	1	1	0	1
1	1	1	0	1	1	0	0	0	1	1	1	0	1	1	1	1	0
0	1	1	0	0	0	0	1	1	1	1	1	0	0	1	1	0	1
0	0	1	0	0	1	0	1	0	0	1	1	0	0	1	1	1	1
1	1	1	0	0	1	0	0	1	1	1	1	0	0	1	0	0	0
1	1	1	0	0	1	0	1	0	1	1	1	0	1	1	1	0	0
0	0	1	0	1	1	0	0	0	0	1	1	0	0	1	1	0	0
0	1	1	1	0	1	0	1	0	1	1	1	0	0	1	1	1	1
0	0	1	1	1	1	0	1	0	1	1	1	0	0	0	0	0	1
1	1	1	0	0	1	0	1	1	1	1	1	0	1	1	1	0	1
0	1	1	1	0	1	1	1	0	0	1	1	0	0	1	1	1	1
0	0	0	0	0	0	0	0	0	1	1	1	0	0	0	0	0	0
1	1	1	0	1	1	0	0	1	1	1	1	0	1	1	1	1	1
0	0	1	0	1	1	0	1	1	1	0	1	1	0	1	1	0	0
1	1	1	1	1	1	1	1	1	1	1	1	0	1	1	1	1	1
0	1	1	0	0	0	0	0	1	1	1	1	0	0	0	1	0	0
0	0	1	1	0	1	0	1	1	1	1	1	0	0	0	0	0	0
1	1	1	1	0	1	1	1	0	1	1	1	0	0	1	1	0	0
0	0	0	0	0	1	0	1	0	1	1	1	0	0	0	0	0	1
0	0	0	1	0	1	0	1	0	0	1	1	0	0	0	1	0	0
0	1	1	0	0	1	0	1	1	1	1	1	0	0	0	0	0	0
0	0	1	0	0	1	0	0	0	0	1	1	0	1	1	1	0	0
0	0	0	0	0	0	0	0	1	1	1	1	0	0	0	1	0	1
1	1	1	0	0	1	0	0	1	1	1	1	0	1	1	1	0	0
1	1	1	0	1	1	0	0	1	1	1	1	0	0	1	1	0	1
0	0	0	0	0	1	0	0	0	1	1	1	0	0	0	0	0	1
0	1	1	0	1	1	0	1	1	1	1	1	1	0	0	0	0	0
0	1	1	1	0	1	0	1	0	1	0	1	1	0	1	1	0	1
0	1	1	0	1	1	0	0	0	1	1	1	0	0	0	1	0	1
0	0	0	0	0	1	0	1	0	0	1	1	1	0	0	1	0	0
1	1	1	0	0	1	0	0	0	1	1	1	1	1	1	1	1	1
0	0	0	1	0	1	0	0	0	1	0	1	1	0	0	1	0	0
0	0	0	0	0	1	0	1	0	0	1	1	1	0	0	0	0	0
0	0	0	0	1	1	0	0	0	0	1	1	1	0	0	1	0	0
0	1	1	0	1	1	0	1	0	1	1	1	0	0	1	1	1	1
1	1	1	1	1	1	0	1	1	1	1	1	1	1	1	1	0	1
0	0	1	0	0	1	0	1	0	1	1	1	0	0	0	1	0	0
0	0	1	0	0	1	0	0	0	0	1	1	0	1	1	1	0	0
1	1	1	0	1	1	0	1	1	1	0	1	1	1	1	1	1	1
0	0	1	0	0	0	0	0	0	1	1	1	1	0	0	1	0	0
0	0	0	0	0	1	0	0	0	1	1	1	1	0	0	1	0	0
1	1	1	1	0	1	1	1	1	1	0	1	0	0	1	1	0	1
0	0	0	0	0	0	0	0	0	1	0	0	1	0	0	0	0	0
1	1	1	1	1	1	0	1	1	1	1	1	1	0	1	1	0	1
0	0	0	1	1	1	0	0	0	1	0	1	0	0	0	1	0	0
1	1	1	0	0	1	0	1	0	1	1	1	0	1	1	1	0	0
0	0	1	0	1	1	0	1	1	1	0	1	1	0	1	1	0	0
0	1	1	1	1	1	0	1	0	1	1	1	1	1	1	1	1	1
0	0	1	1	0	1	1	1	0	1	1	1	1	1	1	1	0	1
0	0	1	1	1	1	0	1	0	1	0	1	0	1	1	1	0	1
0	0	1	1	0	1	0	1	1	1	0	1	1	0	0	1	0	1
1	1	1	0	1	1	0	1	1	1	1	1	1	0	1	1	1	1
0	0	0	0	0	1	0	1	0	1	1	1	1	0	0	0	0	1
1	1	1	0	0	1	0	1	1	1	1	1	0	1	1	1	1	1
1	1	1	0	0	1	0	0	1	1	1	1	1	0	0	1	0	1
0	0	1	0	1	1	0	1	1	1	0	1	1	0	1	1	0	1
1	1	1	0	0	1	0	1	1	1	1	1	1	1	1	1	0	1
1	1	1	0	0	1	0	1	1	1	1	1	1	1	1	1	1	1
1	1	1	1	1	1	0	1	1	1	1	1	1	0	1	1	0	1
0	1	1	0	1	1	0	1	0	1	1	1	1	0	1	1	0	0
0	0	1	1	1	1	1	1	1	1	1	1	1	0	0	0	0	1
0	0	1	1	0	1	1	1	1	1	0	1	1	0	0	1	0	1
0	0	1	1	1	1	1	1	0	1	0	1	0	0	0	1	0	0
0	0	1	0	1	1	0	1	1	1	0	1	1	0	1	1	0	0
0	0	1	0	1	1	0	1	1	1	0	1	1	0	1	1	0	0
0	0	1	0	1	1	0	1	1	1	0	1	1	0	1	1	0	0
0	0	1	0	1	1	0	1	1	1	0	1	1	0	1	1	0	1
0	0	1	0	1	1	0	1	1	1	0	1	1	0	1	1	0	0
0	0	1	0	1	1	0	1	1	1	0	1	1	0	1	1	0	0
0	0	1	0	1	1	0	1	1	1	0	1	1	0	1	1	0	1
0	0	1	0	1	1	0	1	1	1	0	1	1	0	1	1	0	1
0	0	1	0	1	1	0	1	1	1	0	1	1	0	1	1	0	0
0	0	1	0	1	1	0	1	1	1	0	1	1	0	1	1	0	1
0	0	1	0	1	1	0	1	1	1	0	1	1	0	1	1	0	0
0	0	1	0	1	1	0	1	1	1	0	1	1	0	1	1	0	0
0	0	1	0	1	1	0	1	1	1	0	1	1	0	1	1	0	1
0	0	1	0	1	1	0	1	1	1	0	1	1	0	1	1	0	1
0	0	1	0	1	1	0	1	1	1	0	1	1	0	1	1	0	0
0	0	1	0	1	1	0	1	1	1	0	1	1	0	1	1	0	1
0	0	1	0	1	1	0	1	1	1	0	1	1	0	1	1	0	0
0	0	1	0	1	1	0	1	1	1	0	1	1	0	1	1	0	0
0	0	1	0	1	1	0	1	1	1	0	1	1	0	1	1	0	0
0	0	1	0	1	1	0	1	1	1	0	1	1	0	1	1	0	0
0	0	1	0	1	1	0	1	1	1	0	1	1	0	1	1	0	0
0	0	1	0	1	1	0	1	1	1	0	1	1	0	1	1	0	0
0	0	1	0	1	1	0	1	1	1	0	1	1	0	1	1	0	0
0	0	1	0	1	1	0	1	1	1	0	1	1	0	1	1	0	1
0	0	1	0	1	1	0	1	1	1	0	1	1	0	1	1	0	0
0	0	1	0	1	1	0	1	1	1	0	1	1	0	1	1	0	0
0	0	1	0	1	1	0	1	1	1	0	1	1	0	1	1	0	0
0	0	1	0	1	1	0	1	1	1	0	1	1	0	1	1	0	0
0	0	1	0	1	1	0	1	1	1	0	1	1	0	1	1	0	0
0	0	1	0	1	1	0	1	1	1	0	1	1	0	1	1	0	1
0	0	1	0	1	1	0	1	1	1	0	1	1	0	1	1	0	0
0	0	1	0	1	1	0	1	1	1	0	1	1	0	1	1	0	0
0	0	1	0	1	1	0	1	1	1	0	1	1	0	1	1	0	0
0	0	1	0	1	1	0	1	1	1	0	1	1	0	1	1	0	0
0	0	1	0	1	1	0	1	1	1	0	1	1	0	1	1	0	1
0	0	1	0	1	1	0	1	1	1	0	1	1	0	1	1	0	1
0	0	1	0	1	1	0	1	1	1	0	1	1	0	1	1	0	0
0	0	1	0	1	1	0	1	1	1	0	1	1	0	1	1	0	0
0	0	1	0	1	1	0	1	1	1	0	1	1	0	1	1	0	0
0	0	1	0	1	1	0	1	1	1	0	1	1	0	1	1	0	0
0	0	1	0	1	1	0	1	1	1	0	1	1	0	1	1	0	1
0	0	1	0	1	1	0	1	1	1	0	1	1	0	1	1	0	1
0	0	1	0	1	1	0	1	1	1	0	1	1	0	1	1	0	0
0	0	1	0	1	1	0	1	1	1	0	1	1	0	1	1	0	0
0	0	1	0	1	1	0	1	1	1	0	1	1	0	1	1	0	0
0	0	1	0	1	1	0	1	1	1	0	1	1	0	1	1	0	0
0	0	1	0	1	1	0	1	1	1	0	1	1	0	1	1	0	0
0	0	1	0	1	1	0	1	1	1	0	1	1	0	1	1	0	0
0	0	1	0	1	1	0	1	1	1	0	1	1	0	1	1	0	1
0	0	1	0	1	1	0	1	1	1	0	1	1	0	1	1	0	0
0	0	1	0	1	1	0	1	1	1	0	1	1	0	1	1	0	0
0	0	1	0	1	1	0	1	1	1	0	1	1	0	1	1	0	0
0	0	1	0	1	1	0	1	1	1	0	1	1	0	1	1	0	0
0	0	1	0	1	1	0	1	1	1	0	1	1	0	1	1	0	0
0	0	1	0	1	1	0	1	1	1	0	1	1	0	1	1	0	0
0	0	1	0	1	1	0	1	1	1	0	1	1	0	1	1	0	0
0	0	1	0	1	1	0	1	1	1	0	1	1	0	1	1	0	0
0	0	1	0	1	1	0	1	1	1	0	1	1	0	1	1	0	1
0	0	1	0	1	1	0	1	1	1	0	1	1	0	1	1	0	0
0	0	1	0	1	1	0	1	1	1	0	1	1	0	1	1	0	1
0	0	1	0	1	1	0	1	1	1	0	1	1	0	1	1	0	1
0	0	1	0	1	1	0	1	1	1	0	1	1	0	1	1	0	1
0	0	1	0	1	1	0	1	1	1	0	1	1	0	1	1	0	0
0	0	1	0	1	1	0	1	1	1	0	1	1	0	1	1	0	0
0	0	1	0	1	1	0	1	1	1	0	1	1	0	1	1	0	0
0	0	1	0	1	1	0	1	1	1	0	1	1	0	1	1	0	0
0	0	1	0	1	1	0	1	1	1	0	1	1	0	1	1	0	0
0	0	1	0	1	1	0	1	1	1	0	1	1	0	1	1	0	1
0	0	1	0	1	1	0	1	1	1	0	1	1	0	1	1	0	1
0	0	1	0	1	1	0	1	1	1	0	1	1	0	1	1	0	0
0	0	1	0	1	1	0	1	1	1	0	1	1	0	1	1	0	0
0	0	1	0	1	1	0	1	1	1	0	1	1	0	1	1	0	0
0	0	1	0	1	1	0	1	1	1	0	1	1	0	1	1	0	0
0	0	1	0	1	1	0	1	1	1	0	1	1	0	1	1	0	0
0	0	1	0	1	1	0	1	1	1	0	1	1	0	1	1	0	0
0	0	1	0	1	1	0	1	1	1	0	1	1	0	1	1	0	0
0	0	1	0	1	1	0	1	1	1	0	1	1	0	1	1	0	0
0	0	1	0	1	1	0	1	1	1	0	1	1	0	1	1	0	0
0	0	1	0	1	1	0	1	1	1	0	1	1	0	1	1	0	0
0	0	1	0	1	1	0	1	1	1	0	1	1	0	1	1	0	0
0	0	1	0	1	1	0	1	1	1	0	1	1	0	1	1	0	1
0	0	1	0	1	1	0	1	1	1	0	1	1	0	1	1	0	0
0	0	1	0	1	1	0	1	1	1	0	1	1	0	1	1	0	1
0	0	1	0	1	1	0	1	1	1	0	1	1	0	1	1	0	0
0	0	1	0	1	1	0	1	1	1	0	1	1	0	1	1	0	0
0	0	1	0	1	1	0	1	1	1	0	1	1	0	1	1	0	1
0	0	1	0	1	1	0	1	1	1	0	1	1	0	1	1	0	1
0	0	1	0	1	1	0	1	1	1	0	1	1	0	1	1	0	1
0	0	1	0	1	1	0	1	1	1	0	1	1	0	1	1	0	1
0	0	1	0	1	1	0	1	1	1	0	1	1	0	1	1	0	0
0	0	1	0	1	1	0	1	1	1	0	1	1	0	1	1	0	0
0	0	1	0	1	1	0	1	1	1	0	1	1	0	1	1	0	0
0	0	1	0	1	1	0	1	1	1	0	1	1	0	1	1	0	0
0	0	1	0	1	1	0	1	1	1	0	1	1	0	1	1	0	1
0	0	1	0	1	1	0	1	1	1	0	1	1	0	1	1	0	0
0	0	1	0	1	1	0	1	1	1	0	1	1	0	1	1	0	0
0	0	1	0	1	1	0	1	1	1	0	1	1	0	1	1	0	0
0	0	1	0	1	1	0	1	1	1	0	1	1	0	1	1	0	1
0	0	1	0	1	1	0	1	1	1	0	1	1	0	1	1	0	0
0	0	1	0	1	1	0	1	1	1	0	1	1	0	1	1	0	0
0	0	1	0	1	1	0	1	1	1	0	1	1	0	1	1	0	1
0	0	1	0	1	1	0	1	1	1	0	1	1	0	1	1	0	0
0	0	1	0	1	1	0	1	1	1	0	1	1	0	1	1	0	1
0	0	1	0	1	1	0	1	1	1	0	1	1	0	1	1	0	0
0	0	1	0	1	1	0	1	1	1	0	1	1	0	1	1	0	0
0	0	1	0	1	1	0	1	1	1	0	1	1	0	1	1	0	0
0	0	1	0	1	1	0	1	1	1	0	1	1	0	1	1	0	1
0	0	1	0	1	1	0	1	1	1	0	1	1	0	1	1	0	0
0	0	1	0	1	1	0	1	1	1	0	1	1	0	1	1	0	0
0	0	1	0	1	1	0	1	1	1	0	1	1	0	1	1	0	0
0	0	1	0	1	1	0	1	1	1	0	1	1	0	1	1	0	0
0	0	1	0	1	1	0	1	1	1	0	1	1	0	1	1	0	1
0	0	1	0	1	1	0	1	1	1	0	1	1	0	1	1	0	0
0	0	1	0	1	1	0	1	1	1	0	1	1	0	1	1	0	1
0	0	1	0	1	1	0	1	1	1	0	1	1	0	1	1	0	0
0	0	1	0	1	1	0	1	1	1	0	1	1	0	1	1	0	1
0	0	1	0	1	1	0	1	1	1	0	1	1	0	1	1	0	0
0	0	1	0	1	1	0	1	1	1	0	1	1	0	1	1	0	0
0	0	1	0	1	1	0	1	1	1	0	1	1	0	1	1	0	0
0	0	1	0	1	1	0	1	1	1	0	1	1	0	1	1	0	1
0	0	1	0	1	1	0	1	1	1	0	1	1	0	1	1	0	0
0	0	1	0	1	1	0	1	1	1	0	1	1	0	1	1	0	0
0	0	1	0	1	1	0	1	1	1	0	1	1	0	1	1	0	0
0	0	1	0	1	1	0	1	1	1	0	1	1	0	1	1	0	1
0	0	1	0	1	1	0	1	1	1	0	1	1	0	1	1	0	0
0	0	1	0	1	1	0	1	1	1	0	1	1	0	1	1	0	0
0	0	1	0	1	1	0	1	1	1	0	1	1	0	1	1	0	0
0	0	1	0	1	1	0	1	1	1	0	1	1	0	1	1	0	1
0	0	1	0	1	1	0	1	1	1	0	1	1	0	1	1	0	0
0	0	1	0	1	1	0	1	1	1	0	1	1	0	1	1	0	0
0	0	1	0	1	1	0	1	1	1	0	1	1	0	1	1	0	0
0	0	1	0	1	1	0	1	1	1	0	1	1	0	1	1	0	0
0	0	1	0	1	1	0	1	1	1	0	1	1	0	1	1	0	0
0	0	1	0	1	1	0	1	1	1	0	1	1	0	1	1	0	0
0	0	1	0	1	1	0	1	1	1	0	1	1	0	1	1	0	1
0	0	1	0	1	1	0	1	1	1	0	1	1	0	1	1	0	0
0	0	1	0	1	1	0	1	1	1	0	1	1	0	1	1	0	0
0	0	1	0	1	1	0	1	1	1	0	1	1	0	1	1	0	0
0	0	1	0	1	1	0	1	1	1	0	1	1	0	1	1	0	0
0	0	1	0	1	1	0	1	1	1	0	1	1	0	1	1	0	1
0	0	1	0	1	1	0	1	1	1	0	1	1	0	1	1	0	0
0	0	1	0	1	1	0	1	1	1	0	1	1	0	1	1	0	0
0	0	1	0	1	1	0	1	1	1	0	1	1	0	1	1	0	0
0	0	1	0	1	1	0	1	1	1	0	1	1	0	1	1	0	1
0	0	1	0	1	1	0	1	1	1	0	1	1	0	1	1	0	0
0	0	1	0	1	1	0	1	1	1	0	1	1	0	1	1	0	1
0	0	1	0	1	1	0	1	1	1	0	1	1	0	1	1	0	1
0	0	1	0	1	1	0	1	1	1	0	1	1	0	1	1	0	1
0	0	1	0	1	1	0	1	1	1	0	1	1	0	1	1	0	1
0	0	1	0	1	1	0	1	1	1	0	1	1	0	1	1	0	0
0	0	1	0	1	1	0	1	1	1	0	1	1	0	1	1	0	0
0	0	1	0	1	1	0	1	1	1	0	1	1	0	1	1	0	1
0	0	1	0	1	1	0	1	1	1	0	1	1	0	1	1	0	0
0	0	1	0	1	1	0	1	1	1	0	1	1	0	1	1	0	1
0	0	1	0	1	1	0	1	1	1	0	1	1	0	1	1	0	0
0	0	1	0	1	1	0	1	1	1	0	1	1	0	1	1	0	0
0	0	1	0	1	1	0	1	1	1	0	1	1	0	1	1	0	0
0	0	1	0	1	1	0	1	1	1	0	1	1	0	1	1	0	0
0	0	1	0	1	1	0	1	1	1	0	1	1	0	1	1	0	0
0	0	1	0	1	1	0	1	1	1	0	1	1	0	1	1	0	0
0	0	1	0	1	1	0	1	1	1	0	1	1	0	1	1	0	1
0	0	1	0	1	1	0	1	1	1	0	1	1	0	1	1	0	0
0	0	1	0	1	1	0	1	1	1	0	1	1	0	1	1	0	0
0	0	1	0	1	1	0	1	1	1	0	1	1	0	1	1	0	0
0	0	1	0	1	1	0	1	1	1	0	1	1	0	1	1	0	1
0	0	1	0	1	1	0	1	1	1	0	1	1	0	1	1	0	0
0	0	1	0	1	1	0	1	1	1	0	1	1	0	1	1	0	0
0	0	1	0	1	1	0	1	1	1	0	1	1	0	1	1	0	0
0	0	1	0	1	1	0	1	1	1	0	1	1	0	1	1	0	0
0	0	1	0	1	1	0	1	1	1	0	1	1	0	1	1	0	0
0	0	1	0	1	1	0	1	1	1	0	1	1	0	1	1	0	0
0	0	1	0	1	1	0	1	1	1	0	1	1	0	1	1	0	0
0	0	1	0	1	1	0	1	1	1	0	1	1	0	1	1	0	1
0	0	1	0	1	1	0	1	1	1	0	1	1	0	1	1	0	1
0	0	1	0	1	1	0	1	1	1	0	1	1	0	1	1	0	0
0	0	1	0	1	1	0	1	1	1	0	1	1	0	1	1	0	0
0	0	1	0	1	1	0	1	1	1	0	1	1	0	1	1	0	0
0	0	1	0	1	1	0	1	1	1	0	1	1	0	1	1	0	0
0	0	1	0	1	1	0	1	1	1	0	1	1	0	1	1	0	0
0	0	1	0	1	1	0	1	1	1	0	1	1	0	1	1	0	0
0	0	1	0	1	1	0	1	1	1	0	1	1	0	1	1	0	0
0	0	1	0	1	1	0	1	1	1	0	1	1	0	1	1	0	1
0	0	1	0	1	1	0	1	1	1	0	1	1	0	1	1	0	0
0	0	1	0	1	1	0	1	1	1	0	1	1	0	1	1	0	1
0	0	1	0	1	1	0	1	1	1	0	1	1	0	1	1	0	1
0	0	1	0	1	1	0	1	1	1	0	1	1	0	1	1	0	0
0	0	1	0	1	1	0	1	1	1	0	1	1	0	1	1	0	0
0	0	1	0	1	1	0	1	1	1	0	1	1	0	1	1	0	0
0	0	1	0	1	1	0	1	1	1	0	1	1	0	1	1	0	0
0	0	1	0	1	1	0	1	1	1	0	1	1	0	1	1	0	0
0	0	1	0	1	1	0	1	1	1	0	1	1	0	1	1	0	0
0	0	1	0	1	1	0	1	1	1	0	1	1	0	1	1	0	1
0	0	1	0	1	1	0	1	1	1	0	1	1	0	1	1	0	1
0	0	1	0	1	1	0	1	1	1	0	1	1	0	1	1	0	1
0	0	1	0	1	1	0	1	1	1	0	1	1	0	1	1	0	1
0	0	1	0	1	1	0	1	1	1	0	1	1	0	1	1	0	1
0	0	1	0	1	1	0	1	1	1	0	1	1	0	1	1	0	1
0	0	1	0	1	1	0	1	1	1	0	1	1	0	1	1	0	1
0	0	1	0	1	1	0	1	1	1	0	1	1	0	1	1	0	0
0	0	1	0	1	1	0	1	1	1	0	1	1	0	1	1	0	0
0	0	1	0	1	1	0	1	1	1	0	1	1	0	1	1	0	0
0	0	1	0	1	1	0	1	1	1	0	1	1	0	1	1	0	0
0	0	1	0	1	1	0	1	1	1	0	1	1	0	1	1	0	1
0	0	1	0	1	1	0	1	1	1	0	1	1	0	1	1	0	1
0	0	1	0	1	1	0	1	1	1	0	1	1	0	1	1	0	0
0	0	1	0	1	1	0	1	1	1	0	1	1	0	1	1	0	0
0	0	1	0	1	1	0	1	1	1	0	1	1	0	1	1	0	0
0	0	1	0	1	1	0	1	1	1	0	1	1	0	1	1	0	1
0	0	1	0	1	1	0	1	1	1	0	1	1	0	1	1	0	0
0	0	1	0	1	1	0	1	1	1	0	1	1	0	1	1	0	0
0	0	1	0	1	1	0	1	1	1	0	1	1	0	1	1	0	0
0	0	1	0	1	1	0	1	1	1	0	1	1	0	1	1	0	0
0	0	1	0	1	1	0	1	1	1	0	1	1	0	1	1	0	0
0	0	1	0	1	1	0	1	1	1	0	1	1	0	1	1	0	1
0	0	1	0	1	1	0	1	1	1	0	1	1	0	1	1	0	0
0	0	1	0	1	1	0	1	1	1	0	1	1	0	1	1	0	0
0	0	1	0	1	1	0	1	1	1	0	1	1	0	1	1	0	0
0	0	1	0	1	1	0	1	1	1	0	1	1	0	1	1	0	1
0	0	1	0	1	1	0	1	1	1	0	1	1	0	1	1	0	0
0	0	1	0	1	1	0	1	1	1	0	1	1	0	1	1	0	0
0	0	1	0	1	1	0	1	1	1	0	1	1	0	1	1	0	0
0	0	1	0	1	1	0	1	1	1	0	1	1	0	1	1	0	0
0	0	1	0	1	1	0	1	1	1	0	1	1	0	1	1	0	0
0	0	1	0	1	1	0	1	1	1	0	1	1	0	1	1	0	0
0	0	1	0	1	1	0	1	1	1	0	1	1	0	1	1	0	1
0	0	1	0	1	1	0	1	1	1	0	1	1	0	1	1	0	0
0	0	1	0	1	1	0	1	1	1	0	1	1	0	1	1	0	0
0	0	1	0	1	1	0	1	1	1	0	1	1	0	1	1	0	1
0	0	1	0	1	1	0	1	1	1	0	1	1	0	1	1	0	0
0	0	1	0	1	1	0	1	1	1	0	1	1	0	1	1	0	0
0	0	1	0	1	1	0	1	1	1	0	1	1	0	1	1	0	0
0	0	1	0	1	1	0	1	1	1	0	1	1	0	1	1	0	0
0	0	1	0	1	1	0	1	1	1	0	1	1	0	1	1	0	0
0	0	1	0	1	1	0	1	1	1	0	1	1	0	1	1	0	0
0	0	1	0	1	1	0	1	1	1	0	1	1	0	1	1	0	1
0	0	1	0	1	1	0	1	1	1	0	1	1	0	1	1	0	0
0	0	1	0	1	1	0	1	1	1	0	1	1	0	1	1	0	0
0	0	1	0	1	1	0	1	1	1	0	1	1	0	1	1	0	0
0	0	1	0	1	1	0	1	1	1	0	1	1	0	1	1	0	0
0	0	1	0	1	1	0	1	1	1	0	1	1	0	1	1	0	0
0	0	1	0	1	1	0	1	1	1	0	1	1	0	1	1	0	0
0	0	1	0	1	1	0	1	1	1	0	1	1	0	1	1	0	0
0	0	1	0	1	1	0	1	1	1	0	1	1	0	1	1	0	1
0	0	1	0	1	1	0	1	1	1	0	1	1	0	1	1	0	1
0	0	1	0	1	1	0	1	1	1	0	1	1	0	1	1	0	0
0	0	1	0	1	1	0	1	1	1	0	1	1	0	1	1	0	0
0	0	1	0	1	1	0	1	1	1	0	1	1	0	1	1	0	1
0	0	1	0	1	1	0	1	1	1	0	1	1	0	1	1	0	0
0	0	1	0	1	1	0	1	1	1	0	1	1	0	1	1	0	0
0	0	1	0	1	1	0	1	1	1	0	1	1	0	1	1	0	0
0	0	1	0	1	1	0	1	1	1	0	1	1	0	1	1	0	1
0	0	1	0	1	1	0	1	1	1	0	1	1	0	1	1	0	1
0	0	1	0	1	1	0	1	1	1	0	1	1	0	1	1	0	1
0	0	1	0	1	1	0	1	1	1	0	1	1	0	1	1	0	0
0	0	1	0	1	1	0	1	1	1	0	1	1	0	1	1	0	1
0	0	1	0	1	1	0	1	1	1	0	1	1	0	1	1	0	0
0	0	1	0	1	1	0	1	1	1	0	1	1	0	1	1	0	0
0	0	1	0	1	1	0	1	1	1	0	1	1	0	1	1	0	0
0	0	1	0	1	1	0	1	1	1	0	1	1	0	1	1	0	0
0	0	1	0	1	1	0	1	1	1	0	1	1	0	1	1	0	1
0	0	1	0	1	1	0	1	1	1	0	1	1	0	1	1	0	0
0	0	1	0	1	1	0	1	1	1	0	1	1	0	1	1	0	0
0	0	1	0	1	1	0	1	1	1	0	1	1	0	1	1	0	1
0	0	1	0	1	1	0	1	1	1	0	1	1	0	1	1	0	1
0	0	1	0	1	1	0	1	1	1	0	1	1	0	1	1	0	0
0	0	1	0	1	1	0	1	1	1	0	1	1	0	1	1	0	0
0	0	1	0	1	1	0	1	1	1	0	1	1	0	1	1	0	0
0	0	1	0	1	1	0	1	1	1	0	1	1	0	1	1	0	1
0	0	1	0	1	1	0	1	1	1	0	1	1	0	1	1	0	1
0	0	1	0	1	1	0	1	1	1	0	1	1	0	1	1	0	1
0	0	1	0	1	1	0	1	1	1	0	1	1	0	1	1	0	0
0	0	1	0	1	1	0	1	1	1	0	1	1	0	1	1	0	0
0	0	1	0	1	1	0	1	1	1	0	1	1	0	1	1	0	1
0	0	1	0	1	1	0	1	1	1	0	1	1	0	1	1	0	0
0	0	1	0	1	1	0	1	1	1	0	1	1	0	1	1	0	1
0	0	1	0	1	1	0	1	1	1	0	1	1	0	1	1	0	1
0	0	1	0	1	1	0	1	1	1	0	1	1	0	1	1	0	0
0	0	1	0	1	1	0	1	1	1	0	1	1	0	1	1	0	1
0	0	1	0	1	1	0	1	1	1	0	1	1	0	1	1	0	0
0	0	1	0	1	1	0	1	1	1	0	1	1	0	1	1	0	0
0	0	1	0	1	1	0	1	1	1	0	1	1	0	1	1	0	0
0	0	1	0	1	1	0	1	1	1	0	1	1	0	1	1	0	0
0	0	1	0	1	1	0	1	1	1	0	1	1	0	1	1	0	0
0	0	1	0	1	1	0	1	1	1	0	1	1	0	1	1	0	0
0	0	1	0	1	1	0	1	1	1	0	1	1	0	1	1	0	0
0	0	1	0	1	1	0	1	1	1	0	1	1	0	1	1	0	1
0	0	1	0	1	1	0	1	1	1	0	1	1	0	1	1	0	0
0	0	1	0	1	1	0	1	1	1	0	1	1	0	1	1	0	0
0	0	1	0	1	1	0	1	1	1	0	1	1	0	1	1	0	1
0	0	1	0	1	1	0	1	1	1	0	1	1	0	1	1	0	0
0	0	1	0	1	1	0	1	1	1	0	1	1	0	1	1	0	0
0	0	1	0	1	1	0	1	1	1	0	1	1	0	1	1	0	0
0	0	1	0	1	1	0	1	1	1	0	1	1	0	1	1	0	1
0	0	1	0	1	1	0	1	1	1	0	1	1	0	1	1	0	1
0	0	1	0	1	1	0	1	1	1	0	1	1	0	1	1	0	0
0	0	1	0	1	1	0	1	1	1	0	1	1	0	1	1	0	1
0	0	1	0	1	1	0	1	1	1	0	1	1	0	1	1	0	0
0	0	1	0	1	1	0	1	1	1	0	1	1	0	1	1	0	1
0	0	1	0	1	1	0	1	1	1	0	1	1	0	1	1	0	1
0	0	1	0	1	1	0	1	1	1	0	1	1	0	1	1	0	0
0	0	1	0	1	1	0	1	1	1	0	1	1	0	1	1	0	1
0	0	1	0	1	1	0	1	1	1	0	1	1	0	1	1	0	0
0	0	1	0	1	1	0	1	1	1	0	1	1	0	1	1	0	0
0	0	1	0	1	1	0	1	1	1	0	1	1	0	1	1	0	0
0	0	1	0	1	1	0	1	1	1	0	1	1	0	1	1	0	0
0	0	1	0	1	1	0	1	1	1	0	1	1	0	1	1	0	0
0	0	1	0	1	1	0	1	1	1	0	1	1	0	1	1	0	0
0	0	1	0	1	1	0	1	1	1	0	1	1	0	1	1	0	0
0	0	1	0	1	1	0	1	1	1	0	1	1	0	1	1	0	0
0	0	1	0	1	1	0	1	1	1	0	1	1	0	1	1	0	1
0	0	1	0	1	1	0	1	1	1	0	1	1	0	1	1	0	0
0	0	1	0	1	1	0	1	1	1	0	1	1	0	1	1	0	1
0	0	1	0	1	1	0	1	1	1	0	1	1	0	1	1	0	1
0	0	1	0	1	1	0	1	1	1	0	1	1	0	1	1	0	0
0	0	1	0	1	1	0	1	1	1	0	1	1	0	1	1	0	1
0	0	1	0	1	1	0	1	1	1	0	1	1	0	1	1	0	0
0	0	1	0	1	1	0	1	1	1	0	1	1	0	1	1	0	0
0	0	1	0	1	1	0	1	1	1	0	1	1	0	1	1	0	0
0	0	1	0	1	1	0	1	1	1	0	1	1	0	1	1	0	0
0	0	1	0	1	1	0	1	1	1	0	1	1	0	1	1	0	0
0	0	1	0	1	1	0	1	1	1	0	1	1	0	1	1	0	0
0	0	1	0	1	1	0	1	1	1	0	1	1	0	1	1	0	0
0	0	1	0	1	1	0	1	1	1	0	1	1	0	1	1	0	0
0	0	1	0	1	1	0	1	1	1	0	1	1	0	1	1	0	0
0	0	1	0	1	1	0	1	1	1	0	1	1	0	1	1	0	0
0	0	1	0	1	1	0	1	1	1	0	1	1	0	1	1	0	0
0	0	1	0	1	1	0	1	1	1	0	1	1	0	1	1	0	0
0	0	1	0	1	1	0	1	1	1	0	1	1	0	1	1	0	1
0	0	1	0	1	1	0	1	1	1	0	1	1	0	1	1	0	0
0	0	1	0	1	1	0	1	1	1	0	1	1	0	1	1	0	1
0	0	1	0	1	1	0	1	1	1	0	1	1	0	1	1	0	0
0	0	1	0	1	1	0	1	1	1	0	1	1	0	1	1	0	0
0	0	1	0	1	1	0	1	1	1	0	1	1	0	1	1	0	1
0	0	1	0	1	1	0	1	1	1	0	1	1	0	1	1	0	0
0	0	1	0	1	1	0	1	1	1	0	1	1	0	1	1	0	0
0	0	1	0	1	1	0	1	1	1	0	1	1	0	1	1	0	0
0	0	1	0	1	1	0	1	1	1	0	1	1	0	1	1	0	0
0	0	1	0	1	1	0	1	1	1	0	1	1	0	1	1	0	0
0	0	1	0	1	1	0	1	1	1	0	1	1	0	1	1	0	0
0	0	1	0	1	1	0	1	1	1	0	1	1	0	1	1	0	0
0	0	1	0	1	1	0	1	1	1	0	1	1	0	1	1	0	0
0	0	1	0	1	1	0	1	1	1	0	1	1	0	1	1	0	0
0	0	1	0	1	1	0	1	1	1	0	1	1	0	1	1	0	0
0	0	1	0	1	1	0	1	1	1	0	1	1	0	1	1	0	0
0	0	1	0	1	1	0	1	1	1	0	1	1	0	1	1	0	0
0	0	1	0	1	1	0	1	1	1	0	1	1	0	1	1	0	0
0	0	1	0	1	1	0	1	1	1	0	1	1	0	1	1	0	0
0	0	1	0	1	1	0	1	1	1	0	1	1	0	1	1	0	0
0	0	1	0	1	1	0	1	1	1	0	1	1	0	1	1	0	0
0	0	1	0	1	1	0	1	1	1	0	1	1	0	1	1	0	0
0	0	1	0	1	1	0	1	1	1	0	1	1	0	1	1	0	0
0	0	1	0	1	1	0	1	1	1	0	1	1	0	1	1	0	0
0	0	1	0	1	1	0	1	1	1	0	1	1	0	1	1	0	1
0	0	1	0	1	1	0	1	1	1	0	1	1	0	1	1	0	1
0	0	1	0	1	1	0	1	1	1	0	1	1	0	1	1	0	1
0	0	1	0	1	1	0	1	1	1	0	1	1	0	1	1	0	1
0	0	1	0	1	1	0	1	1	1	0	1	1	0	1	1	0	0
0	0	1	0	1	1	0	1	1	1	0	1	1	0	1	1	0	0
0	0	1	0	1	1	0	1	1	1	0	1	1	0	1	1	0	1
0	0	1	0	1	1	0	1	1	1	0	1	1	0	1	1	0	1
0	0	1	0	1	1	0	1	1	1	0	1	1	0	1	1	0	0
0	0	1	0	1	1	0	1	1	1	0	1	1	0	1	1	0	0
0	0	1	0	1	1	0	1	1	1	0	1	1	0	1	1	0	0
0	0	1	0	1	1	0	1	1	1	0	1	1	0	1	1	0	1
0	0	1	0	1	1	0	1	1	1	0	1	1	0	1	1	0	0
0	0	1	0	1	1	0	1	1	1	0	1	1	0	1	1	0	0
0	0	1	0	1	1	0	1	1	1	0	1	1	0	1	1	0	1
0	0	1	0	1	1	0	1	1	1	0	1	1	0	1	1	0	0
0	0	1	0	1	1	0	1	1	1	0	1	1	0	1	1	0	1
0	0	1	0	1	1	0	1	1	1	0	1	1	0	1	1	0	0
0	0	1	0	1	1	0	1	1	1	0	1	1	0	1	1	0	1
0	0	1	0	1	1	0	1	1	1	0	1	1	0	1	1	0	0
0	0	1	0	1	1	0	1	1	1	0	1	1	0	1	1	0	0
0	0	1	0	1	1	0	1	1	1	0	1	1	0	1	1	0	1
0	0	1	0	1	1	0	1	1	1	0	1	1	0	1	1	0	1
0	0	1	0	1	1	0	1	1	1	0	1	1	0	1	1	0	0
0	0	1	0	1	1	0	1	1	1	0	1	1	0	1	1	0	0
0	0	1	0	1	1	0	1	1	1	0	1	1	0	1	1	0	1
0	0	1	0	1	1	0	1	1	1	0	1	1	0	1	1	0	1
0	0	1	0	1	1	0	1	1	1	0	1	1	0	1	1	0	1
0	0	1	0	1	1	0	1	1	1	0	1	1	0	1	1	0	0
1	1	1	1	0	1	1	1	0	1	1	1	0	1	1	1	1	1
0	0	1	0	0	1	0	1	1	1	1	1	0	0	0	0	0	1
1	1	1	1	1	1	1	1	1	1	1	1	0	1	1	1	1	1
1	1	1	0	0	1	0	1	0	1	1	1	0	1	1	1	1	1
0	0	1	0	0	1	0	0	0	1	0	1	0	0	1	1	0	0
1	1	1	0	0	1	0	1	1	1	1	1	0	0	0	1	0	1
0	0	1	1	1	1	1	1	1	1	1	1	0	0	0	0	0	0
0	0	0	0	0	0	0	0	0	0	0	1	0	0	0	1	0	0
0	0	1	0	0	1	0	1	0	0	0	1	0	0	1	1	0	0
0	1	1	1	1	1	0	1	0	0	1	1	0	0	1	1	1	0
1	1	1	1	1	1	0	1	1	1	1	1	0	1	1	1	1	1
1	1	1	0	1	1	0	0	1	1	1	1	0	0	1	1	0	0
1	1	1	0	0	1	0	1	1	1	1	1	0	0	1	1	0	1
0	0	1	0	0	1	0	0	0	0	1	1	0	1	1	1	0	1
1	1	1	0	0	1	0	1	1	1	1	1	0	0	0	1	0	1
0	0	1	0	0	0	0	0	1	1	0	1	0	0	0	0	0	0
0	0	1	1	0	1	1	1	0	1	1	1	0	0	0	0	1	0
0	0	0	0	0	0	0	0	0	1	0	1	0	0	0	0	0	0
1	1	1	0	1	1	0	1	1	1	1	1	0	1	1	1	1	1
1	1	1	0	0	1	0	1	1	1	1	1	0	1	1	1	0	1
1	1	1	0	1	1	0	1	0	1	1	1	0	1	1	1	1	0
0	0	0	0	0	0	0	0	0	0	1	1	0	0	0	1	0	0
0	0	0	0	1	1	0	1	0	1	0	1	0	0	0	1	0	0
0	0	1	0	0	1	0	0	0	1	1	1	0	0	0	0	0	1
0	1	1	0	0	1	0	1	0	1	1	1	0	0	1	1	0	1
0	0	1	1	0	1	0	1	1	1	1	1	0	0	0	0	0	0
0	1	1	0	0	1	0	0	0	1	1	1	0	1	1	0	0	1
0	0	1	0	0	1	0	1	1	1	1	1	0	0	0	1	0	0
1	1	1	1	0	1	1	1	1	1	1	1	0	1	1	1	1	0
1	1	1	0	0	1	0	1	0	1	1	1	0	1	1	1	1	1
1	1	1	0	1	1	0	1	1	1	1	1	0	0	1	1	0	1
0	0	0	1	0	1	0	1	0	1	1	1	0	0	0	1	0	0
0	0	1	0	1	1	0	0	0	0	1	1	0	0	1	1	1	0
1	1	1	1	0	1	0	1	1	1	1	1	0	0	1	1	0	1
0	0	0	0	0	1	0	1	1	1	1	1	0	0	0	0	0	0
1	1	1	0	0	1	0	1	1	1	0	1	0	0	1	1	0	1
0	1	1	0	0	1	0	1	0	1	1	1	0	0	0	1	0	0
1	1	1	1	1	1	0	1	1	1	1	1	0	0	0	0	0	1
0	0	1	0	0	1	0	1	0	1	1	1	0	0	0	1	0	0
1	1	1	0	1	1	0	1	1	1	0	1	0	0	1	1	1	0
0	0	1	1	0	1	0	1	0	1	0	1	0	0	0	0	0	0
0	1	1	1	1	1	0	1	1	1	1	1	0	0	1	0	0	1
0	0	1	1	1	1	1	1	1	1	1	1	0	0	0	0	0	1
1	1	1	1	0	1	0	1	0	1	0	1	0	1	1	1	0	1
0	1	1	1	0	1	0	0	1	1	0	1	0	0	0	1	0	0
0	0	0	0	0	0	0	1	1	1	0	1	0	0	1	1	0	0
1	1	1	0	1	1	0	1	1	1	1	1	0	1	1	1	0	1
0	1	1	0	1	1	0	0	0	1	1	1	0	1	1	1	1	0
0	1	1	0	0	1	0	1	1	1	1	1	0	0	0	1	0	0
1	1	1	0	0	1	0	1	1	1	1	1	0	0	1	1	1	1
0	0	1	0	1	1	0	0	0	0	0	1	0	1	1	1	0	0
0	0	1	1	0	1	0	1	0	1	1	1	0	1	1	1	1	0
1	1	1	1	0	1	1	1	0	1	1	1	0	0	1	1	1	1
0	0	1	0	1	1	0	1	1	1	0	1	0	0	1	1	0	1
0	0	1	1	0	1	1	1	0	1	0	1	0	0	0	1	0	1
1	1	1	1	0	1	0	1	1	1	1	1	0	1	1	1	1	1
0	0	0	1	0	0	0	1	0	0	1	1	0	0	1	1	0	0
0	0	1	1	0	1	0	1	0	1	1	1	0	0	1	0	0	1
0	1	1	0	0	0	0	0	1	1	0	1	0	1	1	0	0	0
0	0	1	1	1	1	1	1	0	1	0	1	0	0	0	0	0	1
0	0	0	0	0	0	0	1	1	1	1	1	0	0	0	1	0	0
0	0	1	0	0	0	0	0	0	1	0	1	0	0	0	0	0	0
1	1	1	1	0	1	0	1	0	1	1	1	0	1	1	1	0	1
1	1	1	0	0	1	0	1	0	1	0	1	0	1	1	1	1	1
1	1	1	1	0	1	0	0	1	1	1	1	0	1	1	1	1	0
1	1	1	0	1	1	0	0	1	1	0	1	0	1	1	1	0	1
1	1	1	0	0	1	0	0	0	0	1	1	0	1	1	0	1	0
1	1	1	1	0	1	0	1	1	1	0	1	0	0	1	1	0	0
0	1	1	0	1	1	0	1	0	0	0	1	0	1	1	1	0	1
0	0	0	0	1	1	0	0	0	0	1	1	0	0	0	1	0	0
0	0	1	0	0	1	0	1	0	1	1	1	0	0	0	1	0	0
1	1	1	0	1	1	0	1	0	1	1	1	0	1	1	1	1	1
0	0	0	1	0	1	0	0	0	0	1	1	0	0	0	1	0	0
0	0	1	0	1	1	0	0	0	1	1	1	0	0	1	1	0	0
0	0	1	0	0	0	0	1	1	1	1	1	0	0	0	1	0	0
1	1	1	0	1	1	0	1	1	1	1	1	0	1	1	1	1	1
0	0	1	0	0	0	0	0	1	1	0	0	0	0	0	0	0	0
1	1	1	1	0	1	0	1	1	1	1	1	0	1	1	1	0	1
1	1	1	0	0	1	0	1	0	1	1	1	0	1	1	1	1	0
0	0	0	1	0	0	0	1	0	0	0	1	0	0	1	1	0	0
1	1	1	1	0	1	0	1	1	1	1	1	0	1	1	1	1	1
1	1	1	1	1	1	0	1	1	1	1	1	0	0	0	1	1	0
1	1	1	0	1	1	0	1	1	1	1	1	0	1	1	1	1	1
0	0	0	0	1	1	0	0	0	0	1	1	0	1	1	0	0	0
0	1	1	1	0	1	1	1	0	1	0	1	0	0	1	0	0	0
0	0	1	0	0	1	0	1	0	1	0	1	0	0	0	1	0	0
0	0	1	0	1	1	0	0	0	1	1	1	0	0	1	1	0	0
0	1	1	1	1	1	1	1	1	1	1	1	0	0	1	1	0	1
0	0	0	0	0	1	0	0	0	0	0	1	0	1	1	0	0	0
0	0	0	0	0	0	0	1	0	1	0	1	0	0	0	1	0	0
0	0	1	0	0	1	0	0	0	1	1	1	0	0	0	1	0	0
0	0	1	1	1	1	1	1	1	1	1	1	0	0	0	1	0	0
0	0	0	0	0	0	0	0	0	0	0	1	0	0	0	1	0	0
0	1	1	0	0	1	0	1	1	1	1	1	0	0	0	1	0	0
1	1	1	0	0	1	0	1	1	1	1	1	0	1	1	1	0	1
0	1	1	1	1	1	0	1	1	1	1	1	0	0	0	0	0	0
0	1	1	0	1	1	0	1	0	1	1	1	0	0	0	1	0	1
0	0	1	0	1	1	0	1	0	0	1	1	0	0	0	1	0	1
0	0	1	0	0	1	0	1	0	1	0	1	0	0	0	1	0	0
0	0	1	1	0	1	0	1	1	1	0	1	0	0	0	1	0	0
0	0	1	0	1	1	0	1	1	1	1	1	0	0	0	0	0	0
0	0	0	1	0	1	1	1	0	0	1	1	0	0	0	1	0	0
0	0	1	1	1	1	0	1	0	1	1	1	0	0	1	1	0	0
0	0	1	0	1	1	0	1	0	0	1	1	0	0	0	1	0	0
0	0	1	0	0	1	0	0	0	1	1	1	0	0	0	1	0	0
0	1	1	1	1	1	0	1	0	1	1	1	0	0	1	1	0	1
1	1	1	1	1	1	0	1	1	1	1	1	0	0	0	1	0	1
0	1	1	1	0	1	0	1	1	1	1	1	0	1	1	1	1	0
0	1	1	1	0	1	0	0	1	1	1	1	0	0	0	0	0	0
0	0	1	1	1	1	1	1	1	1	0	1	0	0	0	0	0	0
0	0	1	1	0	1	0	1	1	1	1	1	0	0	0	0	0	0
0	0	0	1	0	1	0	1	0	1	1	1	0	0	0	0	0	0
1	1	1	0	0	1	0	0	1	1	1	1	0	1	1	1	0	1
0	0	1	0	0	0	0	1	0	1	0	1	0	0	1	0	0	0
0	1	1	0	0	1	0	1	0	1	1	1	0	0	1	1	0	0
0	0	0	0	0	1	0	0	0	0	0	0	0	0	0	0	0	1
0	0	0	1	0	1	0	0	0	0	1	1	0	0	0	1	1	0
0	1	1	0	0	0	0	0	1	1	0	1	0	0	0	0	0	1
1	1	1	0	1	1	0	1	1	1	1	1	0	0	1	1	1	0
0	0	0	1	0	1	0	0	0	1	1	1	0	1	1	1	0	1
0	0	1	0	1	1	0	1	0	1	1	1	0	0	0	1	0	0
0	1	1	0	0	0	0	0	1	1	1	1	0	0	1	1	0	0
1	1	1	0	0	1	0	1	0	1	1	1	0	1	1	1	1	0
1	1	1	0	0	1	0	0	1	1	0	1	0	0	0	0	0	0
0	0	1	0	0	1	0	1	0	0	0	0	0	0	0	1	0	0
1	1	1	0	1	1	0	1	1	1	1	1	0	1	1	1	1	1
1	1	1	1	1	1	1	1	1	1	0	1	0	0	1	1	1	0
0	1	1	1	1	1	1	1	1	1	0	1	0	1	1	1	0	1
0	0	1	0	0	0	0	1	1	1	0	1	0	0	0	1	0	0
0	0	0	0	0	1	0	0	0	0	0	1	0	0	0	1	0	0
0	0	1	0	0	0	0	0	1	1	1	1	0	0	0	1	0	0
0	1	1	1	0	1	0	1	1	1	1	1	0	0	1	1	1	1
1	1	1	0	0	1	0	1	1	1	1	1	0	1	1	1	1	1
0	1	1	1	1	1	1	1	1	1	1	1	0	0	0	1	1	0
0	0	0	0	0	1	0	1	0	0	0	1	0	0	0	1	0	0
0	0	0	1	1	1	1	1	0	1	1	1	0	0	0	0	0	0
1	1	1	0	0	1	0	1	1	1	1	1	0	0	1	1	0	1
0	0	0	1	0	1	1	1	0	1	1	1	0	0	0	1	0	0
1	1	1	0	0	1	0	1	1	1	1	1	0	0	1	1	0	1
0	0	1	0	1	1	0	1	0	0	0	1	0	0	0	1	0	0
0	0	1	0	0	1	0	1	0	1	1	1	0	0	0	0	0	0
1	1	1	1	1	1	0	1	0	1	1	1	0	1	1	1	1	1
0	0	1	0	0	0	0	0	0	1	0	1	0	0	0	1	0	0
0	0	0	1	1	1	1	1	0	0	0	1	0	0	0	1	0	0
0	0	0	1	1	1	0	1	0	0	0	1	0	0	0	0	0	0
0	0	1	0	0	1	0	1	0	1	1	1	0	0	0	1	1	0
1	1	1	1	1	1	0	1	0	0	1	1	0	1	1	1	1	0
1	1	1	1	1	1	1	1	1	1	1	1	0	1	1	1	1	1
1	1	1	0	0	1	0	1	1	1	1	1	0	1	1	1	1	0
1	1	1	1	1	1	0	1	1	1	1	1	0	0	1	1	1	1
0	1	1	1	1	1	1	1	1	1	1	1	0	0	0	0	0	0
0	0	1	0	0	1	0	1	1	1	1	1	0	0	0	0	0	1
0	0	1	1	1	1	1	1	1	1	1	1	0	0	0	0	0	0
1	1	1	0	1	1	0	0	0	1	1	1	0	1	1	1	1	0
0	0	1	0	0	1	0	1	1	1	1	1	0	0	0	1	0	0
1	1	1	1	1	1	0	1	1	1	1	1	0	1	1	1	0	1
0	1	1	0	0	0	0	1	1	1	1	1	0	0	1	1	1	0
1	1	1	0	0	1	0	1	1	1	1	1	0	1	1	1	1	0
0	0	0	1	1	1	0	0	0	0	0	1	0	0	1	1	0	0
1	1	1	0	0	0	0	1	1	1	1	1	0	0	1	1	0	0
1	1	1	1	0	1	0	1	0	1	1	1	0	1	1	1	1	0
0	0	0	1	0	1	0	0	0	0	0	1	0	1	1	1	0	0
0	0	1	1	1	1	1	1	1	1	1	1	0	0	0	0	1	1
1	1	1	1	0	1	0	1	1	1	1	1	0	1	1	1	1	1
0	1	1	1	0	1	0	1	0	1	0	1	0	0	1	1	0	0
0	1	1	1	0	1	0	1	1	1	1	1	0	0	0	1	0	1
1	1	1	0	1	1	0	0	1	1	1	1	0	0	0	1	0	0
1	1	1	0	1	1	0	1	1	1	1	1	0	1	1	1	0	1
0	1	1	1	0	1	0	1	1	1	1	1	0	0	1	1	0	0
1	1	1	0	0	1	0	1	1	1	1	1	0	1	1	1	0	0
0	0	1	1	0	1	0	1	1	1	0	1	0	0	0	0	0	0
0	0	0	0	0	0	0	0	1	1	0	1	0	0	0	1	0	0
0	0	0	1	0	1	0	0	0	1	1	1	0	0	1	1	0	1
1	1	1	0	1	1	0	0	1	1	1	1	0	0	1	1	0	1
0	1	1	0	1	1	0	1	0	1	1	1	0	0	1	1	1	1
1	1	1	0	0	1	0	1	1	1	1	1	0	0	1	1	1	1
0	0	1	0	0	1	0	1	0	1	0	1	0	0	0	1	0	1
1	1	1	1	0	1	0	1	1	1	1	1	0	1	1	1	1	0
1	1	1	0	0	1	0	1	0	1	1	1	0	1	1	1	1	1
0	1	1	0	1	1	0	1	0	1	0	1	0	1	1	1	0	0
0	0	1	0	1	1	0	1	0	0	1	1	0	0	1	1	0	0
0	0	0	1	0	1	0	1	0	1	1	1	0	0	1	0	1	0
0	0	1	1	1	1	1	1	0	1	1	1	0	0	0	0	0	1
0	0	1	1	0	1	0	1	1	1	1	1	0	0	0	1	0	0
0	0	0	0	0	0	0	0	1	1	0	1	0	0	0	0	0	1
1	1	1	0	0	1	0	1	1	1	1	1	0	0	1	1	0	1
1	1	1	1	0	1	0	1	1	1	1	1	0	1	1	1	1	1
1	1	1	0	1	1	0	1	1	1	1	1	0	1	1	1	1	1
0	0	1	0	0	1	0	1	0	1	1	1	0	0	0	1	0	0
0	1	1	0	0	1	0	1	1	1	1	1	0	0	0	1	0	1
1	1	1	0	1	1	0	1	1	1	1	1	0	1	1	1	1	0
0	0	1	0	0	0	0	0	0	0	1	1	0	1	1	1	1	0
0	0	1	1	0	1	0	1	0	1	1	1	0	0	0	0	0	0
0	0	1	0	0	1	0	1	1	1	0	1	0	0	0	0	0	0
1	1	1	0	1	1	0	1	0	1	1	1	0	1	1	1	0	0
1	1	1	0	0	0	0	0	1	1	1	1	0	0	1	1	0	0
1	1	1	1	1	1	0	1	1	1	1	1	0	1	1	1	1	1
0	0	0	0	0	0	0	0	1	1	0	1	0	0	0	0	0	0
0	0	1	1	1	1	1	1	1	1	1	1	0	0	1	1	1	0
1	1	1	0	1	1	0	1	0	1	1	1	0	1	1	1	0	0
0	0	1	0	0	0	0	0	1	1	1	1	0	0	0	1	0	0
0	0	0	0	0	1	0	0	0	0	0	1	0	1	1	0	1	0
1	1	1	0	1	1	0	1	1	1	1	1	0	1	1	1	1	1
1	1	1	0	0	0	0	0	1	1	1	1	0	1	1	1	1	0
1	1	1	1	0	1	0	1	1	1	1	1	0	1	1	0	0	1
0	0	1	0	0	0	0	1	1	1	1	1	0	0	0	0	0	0
0	1	1	1	0	1	0	1	1	1	1	1	0	0	1	1	0	0
0	0	1	1	0	1	0	0	1	1	0	1	0	0	1	1	0	0
1	1	1	1	0	1	0	1	1	1	1	1	0	0	1	1	0	0
0	0	1	0	0	0	0	1	1	1	1	1	0	0	0	1	0	1
1	1	1	0	1	1	0	0	1	1	1	1	0	1	1	0	1	0
0	1	1	0	0	1	0	1	1	1	1	1	0	0	1	1	0	0
0	0	1	1	0	1	1	1	0	1	1	1	0	0	0	0	0	0
0	0	1	0	0	1	0	1	1	1	1	1	0	0	0	0	0	0
0	0	0	0	0	0	0	1	1	1	0	1	0	0	0	1	0	0
0	0	1	0	1	1	0	0	0	0	1	1	0	0	0	1	0	1
0	0	1	1	0	1	0	1	1	1	1	1	0	0	0	0	0	0
0	1	1	0	0	1	0	1	0	1	0	1	0	1	1	1	0	0
1	1	1	0	0	0	0	1	1	1	0	1	0	1	1	1	0	0
1	1	1	1	0	1	0	0	1	1	1	1	0	1	1	1	1	1
0	0	1	0	0	0	0	0	1	1	0	0	0	0	0	0	0	0
0	0	1	1	1	1	0	1	1	1	1	1	0	0	0	0	0	1
0	1	1	1	0	0	0	1	1	1	0	1	0	0	1	1	0	0
0	0	0	1	1	1	0	0	0	0	1	1	0	1	1	1	0	1
0	1	1	0	0	0	0	0	1	1	0	0	0	0	0	0	0	0
1	1	1	0	1	1	0	1	0	1	1	1	0	0	0	1	0	0
0	0	1	0	0	1	0	0	1	1	1	1	0	0	1	1	0	0
1	1	1	0	1	1	0	1	1	1	1	1	0	1	1	1	1	1
0	0	1	1	1	1	0	1	0	1	1	1	0	0	1	1	0	1
0	0	0	0	0	1	0	0	0	0	1	1	0	0	1	1	0	0
0	0	0	0	0	1	0	1	0	0	1	1	0	0	1	1	0	0
1	1	1	0	0	1	0	1	1	1	0	1	0	1	1	1	0	1
0	0	0	0	1	1	0	1	0	0	1	1	0	1	1	0	1	0
0	0	1	0	0	1	0	0	0	0	0	1	0	0	0	1	0	0
0	0	0	1	0	1	1	1	1	1	1	1	0	0	0	0	0	0
0	1	1	0	0	1	0	1	0	1	1	1	0	0	1	1	0	1
0	1	1	0	0	1	0	1	1	1	1	1	0	0	1	1	0	1
0	1	1	0	1	1	0	0	0	0	0	1	0	0	0	1	0	0
0	0	1	0	1	1	0	0	1	1	0	1	0	1	1	0	0	0
0	0	0	0	1	1	0	1	0	0	1	1	0	0	0	1	0	0
0	1	1	0	0	0	0	0	1	1	1	1	0	0	0	0	0	0
0	0	0	1	0	1	1	1	0	1	0	1	0	0	0	0	0	0
0	0	1	0	0	1	0	0	0	0	1	1	0	0	1	1	0	1
0	1	1	0	0	1	0	0	0	0	1	1	0	1	1	1	1	0
0	1	1	0	1	1	0	1	0	1	0	1	0	0	1	1	0	1
0	0	0	0	0	0	0	0	0	1	0	1	0	0	0	1	0	0
0	1	1	0	1	1	0	1	0	1	0	1	0	0	1	1	0	1
0	0	0	0	0	1	0	1	0	0	1	1	0	0	0	1	0	0
0	0	0	1	0	1	1	1	0	0	1	1	0	0	1	1	1	0
1	1	1	1	1	1	0	1	0	1	1	1	0	0	1	1	0	0
0	0	1	1	1	1	0	1	0	1	1	1	0	0	1	1	0	0
0	0	0	1	0	1	1	1	0	1	1	1	0	1	1	1	1	0
1	1	1	1	0	1	0	1	0	1	0	1	0	1	1	1	0	0
0	1	1	0	1	1	0	1	0	0	1	1	0	0	1	1	0	0
1	1	1	1	0	1	1	1	1	1	1	1	0	1	1	1	1	1
1	1	1	1	0	1	1	1	1	1	1	1	0	0	0	1	0	1
0	0	1	0	0	0	0	0	1	1	1	1	0	0	0	1	0	1
1	1	1	0	0	1	0	1	1	1	1	1	0	1	1	1	0	1
0	0	0	1	1	1	1	1	0	0	0	1	0	0	1	0	0	0
1	1	1	1	0	1	1	1	1	1	1	1	0	1	1	1	1	1
0	0	1	1	0	1	0	1	0	1	0	1	0	0	0	1	0	0
0	0	1	1	0	0	0	1	1	1	1	1	0	0	0	0	0	0
0	0	0	0	0	0	0	0	0	0	0	1	0	1	1	0	0	0
0	0	0	0	1	1	0	1	0	0	1	1	0	0	0	0	0	1
1	1	1	0	1	1	0	1	0	1	1	1	0	1	1	1	1	1
1	1	1	1	0	1	0	1	1	1	1	1	0	0	1	1	0	1
0	1	1	0	0	1	0	0	1	1	1	1	0	0	0	1	0	0
1	1	1	1	0	1	0	1	1	1	1	1	0	0	1	1	0	1
1	1	1	1	1	1	1	1	1	1	1	1	0	1	1	1	1	1
1	1	1	0	1	1	0	0	1	1	0	1	0	1	1	1	1	1
0	1	1	1	0	1	1	1	1	1	1	1	0	0	1	1	1	0
1	1	1	1	1	1	0	1	1	1	1	1	0	0	1	1	0	1
0	1	1	0	0	1	0	1	1	1	0	1	0	0	0	1	0	1
0	0	1	0	0	1	0	0	0	1	0	0	0	0	0	0	0	0
0	1	1	0	0	1	0	1	1	1	0	1	0	0	1	1	0	1
1	1	1	1	0	1	1	1	1	1	0	1	0	1	1	1	0	1
0	0	1	1	1	1	1	1	0	1	1	1	0	0	0	1	0	0
1	1	1	1	0	1	0	1	1	1	1	1	0	0	1	1	0	1
0	0	1	1	0	1	0	1	0	1	0	1	0	1	1	0	0	1
0	0	1	0	0	1	0	1	0	0	0	1	0	0	0	1	0	0
1	1	1	1	0	1	0	1	0	1	1	1	0	1	1	1	0	0
1	1	1	0	1	1	0	1	1	1	1	1	0	1	1	1	1	1
1	1	1	1	0	1	0	1	1	1	1	1	0	0	1	1	1	0
1	1	1	0	0	1	0	1	1	1	1	1	0	0	1	1	0	1
0	0	1	0	0	0	0	1	1	1	1	1	0	0	0	0	0	0
0	0	1	1	0	1	0	0	0	1	1	1	0	0	1	1	0	0
0	0	1	0	0	1	0	0	0	1	1	1	0	0	1	1	1	1
0	0	0	0	0	1	0	1	0	0	1	1	0	0	0	0	0	0
0	0	0	0	0	1	0	0	0	1	1	1	0	0	0	0	0	0
1	1	1	1	1	1	1	1	1	1	0	1	0	0	1	1	0	1
0	0	1	0	0	1	0	1	0	0	1	1	0	0	0	0	0	0
1	1	1	0	0	1	0	0	0	1	1	1	0	1	1	0	0	0
1	1	1	1	1	1	1	1	0	1	1	1	0	1	1	1	1	1
0	0	1	0	0	1	0	1	0	1	0	1	0	0	0	1	0	0
0	0	0	1	0	1	0	0	0	1	1	1	0	0	0	1	0	1
1	1	1	1	1	1	0	1	1	1	1	1	0	1	1	1	1	1
0	1	1	0	0	1	0	0	1	1	0	1	0	0	0	1	0	0
0	0	0	0	0	0	0	0	0	1	0	1	0	0	0	1	0	0
0	0	0	0	1	1	0	1	0	0	1	1	0	0	0	1	0	0
0	0	0	1	0	1	0	1	0	0	1	1	0	0	0	0	0	0
1	1	1	1	1	1	0	1	1	1	1	1	0	1	1	1	1	1
0	0	1	1	0	1	0	1	1	1	1	1	0	0	0	1	1	1
0	0	0	0	0	0	0	1	0	0	0	1	0	0	0	1	0	0
1	1	1	1	1	1	1	1	0	1	1	1	0	0	1	1	0	1
0	0	0	0	0	0	0	0	0	1	0	1	0	0	0	1	0	0
0	0	1	0	0	0	0	1	1	1	1	1	0	0	0	0	0	0
0	1	1	1	1	1	0	0	1	1	1	1	0	0	0	1	0	1
1	1	1	0	1	1	0	1	1	1	1	1	0	0	1	1	1	1
0	1	1	1	0	1	0	1	0	1	1	1	0	0	1	0	1	0
1	1	1	1	1	1	0	1	1	1	0	1	0	0	1	1	0	1
1	1	1	0	0	1	0	1	0	1	1	1	0	1	1	1	0	1
1	1	1	0	1	1	0	1	0	0	1	1	0	0	0	1	1	0
0	0	0	1	0	1	0	0	1	1	0	1	0	0	0	1	0	0
1	1	1	0	1	1	0	1	1	1	1	1	0	0	0	1	0	1
1	1	1	0	0	1	0	1	1	1	1	1	0	1	1	1	0	1
0	0	1	1	0	1	0	1	0	1	0	1	0	0	0	1	0	0
0	1	1	1	0	1	1	1	1	1	1	1	0	0	1	1	1	1
0	0	1	0	0	1	0	0	0	0	1	1	0	0	0	1	0	0
0	0	1	1	0	1	1	1	0	1	1	1	0	0	0	1	0	0
0	0	0	0	0	1	0	0	0	1	0	1	0	0	0	1	0	0
0	0	0	1	0	1	1	1	0	1	1	1	0	0	1	0	0	1
0	0	1	1	0	1	0	1	1	1	1	1	0	0	0	1	0	0
0	0	1	0	0	0	0	0	1	1	1	1	0	1	1	1	0	0
1	1	1	0	0	1	0	1	1	1	0	1	0	0	0	1	0	0
0	0	0	0	0	0	0	0	0	1	1	1	0	1	1	1	0	1
0	0	0	0	0	1	0	0	0	0	0	1	0	0	0	1	0	0
0	0	1	0	0	0	0	1	1	1	1	1	0	0	1	1	0	1
0	0	1	0	1	1	0	1	0	0	1	1	0	0	0	1	0	0
0	1	1	1	0	1	0	1	1	1	1	1	0	0	1	1	0	1
1	1	1	0	0	1	0	1	1	1	1	1	0	1	1	1	0	1
0	0	1	0	0	0	0	1	1	1	1	1	0	0	0	1	0	1
0	0	1	1	0	1	0	1	0	1	0	1	0	0	0	0	0	0
0	0	0	0	0	1	0	0	0	0	0	1	0	0	0	1	0	0
0	0	1	1	0	1	0	1	1	1	0	1	0	0	0	0	0	0
0	0	0	0	0	1	0	0	1	1	1	1	0	0	0	0	0	0
1	1	1	0	1	1	0	1	1	1	1	1	0	1	1	1	1	1
0	0	1	0	1	1	0	1	1	1	1	1	0	0	0	1	0	0
1	1	1	1	0	1	0	0	1	1	1	1	0	1	1	1	0	1
0	0	1	0	0	0	0	1	1	1	1	1	0	0	0	0	0	0
0	0	0	0	0	0	0	0	1	1	1	1	0	0	0	1	0	0
0	0	0	0	0	0	0	0	0	0	0	1	0	0	0	1	0	0
0	0	1	0	0	0	0	0	1	1	0	1	0	0	0	0	0	0
0	0	0	1	0	0	0	1	0	1	0	1	0	0	0	1	0	0
0	0	0	0	0	0	0	1	1	1	1	1	0	0	0	1	0	0
0	1	1	1	1	1	1	1	0	1	1	1	0	0	1	1	0	1
0	1	1	1	0	1	0	1	1	1	0	1	0	0	0	1	0	1
0	0	0	0	1	1	0	1	0	0	1	1	0	0	1	1	0	0
1	1	1	1	0	1	1	1	1	1	0	1	0	1	1	1	1	1
0	1	1	0	0	1	0	1	0	1	0	1	0	0	1	1	0	0
1	1	1	1	1	1	1	1	1	1	1	1	0	0	1	1	0	0
1	1	1	0	1	1	0	1	1	1	1	1	0	0	1	1	1	0
1	1	1	1	1	1	1	1	1	1	0	1	0	1	1	1	1	1
0	0	1	0	0	1	0	0	0	1	1	1	0	0	0	1	0	0
1	1	1	0	1	1	0	1	1	1	1	1	0	0	1	1	0	0
0	0	1	0	0	1	0	1	0	0	1	1	0	0	0	1	0	0
0	0	0	1	0	1	0	1	0	0	1	1	0	0	1	1	0	0
1	1	1	1	1	1	1	1	0	1	1	1	0	1	1	1	0	0
0	0	1	0	0	0	0	1	1	1	0	1	0	0	0	1	0	0
0	0	0	1	1	1	0	0	0	1	1	1	0	0	0	0	0	1
0	0	0	0	0	1	0	0	0	0	1	1	0	1	1	1	1	0
0	0	0	0	0	0	0	1	1	1	1	1	0	0	0	0	0	0
0	0	1	1	1	1	1	1	0	1	0	1	0	0	1	1	0	1
1	1	1	1	1	1	1	1	1	1	1	1	0	0	1	1	1	1
0	0	1	0	0	1	0	1	0	0	0	1	0	1	1	1	0	0
1	1	1	1	0	1	1	1	1	1	1	1	0	1	1	1	0	0
0	0	0	0	0	0	0	0	1	1	1	1	0	0	0	0	0	0
1	1	1	0	0	1	0	1	1	1	1	1	0	1	1	1	0	0
0	0	1	0	0	1	0	0	0	0	0	1	0	0	1	0	0	0
0	0	0	0	0	1	0	1	0	0	1	1	0	0	1	1	0	0
0	0	1	0	0	1	0	0	0	1	0	1	0	1	1	1	0	1
1	1	1	1	0	1	0	1	1	1	1	1	0	1	1	1	0	1
0	0	0	0	0	0	0	1	0	0	0	1	0	0	0	0	0	0
1	1	1	1	0	1	0	1	1	1	1	1	0	1	1	1	1	1
0	0	0	0	1	1	0	0	0	0	1	1	0	0	0	0	0	0
1	1	1	0	0	0	0	0	1	1	0	1	0	0	1	1	0	0
0	0	0	0	1	1	0	0	0	0	1	1	0	0	1	1	0	1
0	0	0	1	0	0	0	1	0	1	1	1	0	0	0	0	0	0
0	0	0	0	0	1	0	0	0	0	0	1	0	0	0	1	0	0
1	1	1	1	0	1	0	1	1	1	1	1	0	1	1	1	0	1
0	0	1	0	1	1	0	1	0	0	1	1	0	0	1	1	0	1
0	1	1	1	0	1	0	1	0	1	0	1	0	0	1	1	1	1
0	0	0	0	0	0	0	0	1	1	0	1	0	0	0	0	0	0
1	1	1	1	0	1	1	1	1	1	1	1	0	0	1	1	1	0
0	0	1	0	0	0	0	0	0	0	0	1	0	1	1	1	0	1
0	0	0	0	0	1	0	1	0	0	0	1	0	0	0	1	0	0
0	0	0	1	0	1	0	1	1	1	1	1	0	0	0	0	0	0
0	0	1	0	0	1	0	1	0	1	0	1	0	0	0	1	0	1
1	1	1	0	1	1	0	1	0	1	1	1	0	1	1	1	0	0
0	0	1	1	0	1	0	1	1	1	1	1	0	0	1	1	1	0
0	1	1	0	0	1	0	1	1	1	1	1	0	0	0	1	0	0
1	1	1	0	1	1	0	1	1	1	1	1	0	1	1	1	0	0
0	0	1	1	0	1	0	1	1	1	1	1	0	0	0	0	0	0
1	1	1	0	1	1	0	1	0	0	1	1	0	1	1	1	1	1
0	0	1	0	0	0	0	1	0	1	1	1	0	0	1	1	0	0
1	1	1	0	1	1	0	1	0	1	1	1	0	1	1	1	1	1
0	0	0	1	1	1	0	0	0	0	1	1	0	0	0	1	0	0
0	0	0	1	1	1	0	1	0	1	1	1	0	0	0	1	0	0
0	0	0	0	0	0	0	0	0	0	1	1	0	1	1	1	0	0
1	1	1	0	1	1	0	1	1	1	1	1	0	1	1	1	0	1
0	0	1	0	0	1	0	1	0	1	0	1	0	0	0	1	0	0
0	1	1	0	1	1	0	0	1	1	1	1	0	0	0	1	0	0
0	0	0	0	0	1	0	1	0	0	1	1	0	0	1	1	0	0
0	0	0	0	0	1	0	1	0	0	0	1	0	0	1	1	0	0
0	0	1	1	1	1	0	1	0	1	1	1	0	0	0	0	0	0
0	0	0	1	0	1	1	1	0	1	0	1	0	0	1	0	0	0
0	1	1	1	1	1	0	0	0	1	1	1	0	1	1	1	1	1
1	1	1	1	0	1	0	1	1	1	0	1	0	1	1	1	0	1
1	1	1	0	1	1	0	1	0	1	1	1	0	0	0	1	0	0
0	1	1	0	0	0	0	1	1	1	1	1	0	0	1	1	0	1
1	1	1	0	1	1	0	1	0	1	1	1	0	1	1	1	0	0
1	1	1	1	1	1	1	1	1	1	1	1	0	1	1	1	0	1
1	1	1	1	0	1	0	1	1	1	1	1	0	1	1	1	1	0
0	0	0	1	1	1	1	1	0	1	1	1	0	0	0	0	0	0
0	1	1	1	0	1	0	1	1	1	1	1	0	0	1	1	0	0
1	1	1	1	1	1	0	0	1	1	1	1	0	1	1	1	1	0
1	1	1	1	1	1	1	1	1	1	0	1	0	1	1	0	0	1
0	0	0	0	1	1	0	0	0	1	1	1	0	1	1	1	1	1
0	0	1	1	1	1	0	1	0	1	1	1	0	0	0	1	0	1
0	0	0	0	0	0	0	0	0	1	0	1	0	1	1	1	0	0
0	0	1	0	0	0	0	0	0	1	1	1	0	0	1	1	0	0
1	1	1	0	0	1	0	1	0	1	1	1	0	0	1	1	0	0
1	1	1	1	0	1	1	1	1	1	1	1	0	1	1	1	1	1
0	0	1	1	1	1	0	1	0	1	0	1	0	1	1	1	0	1
1	1	1	1	1	1	1	1	1	1	1	1	0	1	1	1	0	1
1	1	1	1	0	1	0	1	0	1	1	1	0	1	1	1	1	0
0	1	1	1	0	1	0	1	1	1	1	1	0	0	0	1	0	0
0	0	1	1	0	1	0	0	0	1	1	1	0	0	0	1	0	0
1	1	1	0	1	1	0	1	1	1	1	1	0	1	1	1	0	1
1	1	1	1	1	1	0	1	0	1	1	1	0	1	1	1	0	1
0	0	0	0	0	1	0	0	0	0	1	1	0	1	1	1	0	0
0	1	1	0	0	0	0	0	1	1	1	1	0	0	1	1	0	1
0	0	1	1	0	1	1	1	0	1	1	1	0	1	1	1	0	1
0	0	0	1	0	1	0	1	0	0	1	1	0	0	1	1	0	0
0	1	1	1	1	1	0	1	0	1	1	1	0	0	1	1	1	1
0	0	0	0	0	0	0	0	0	0	1	1	0	0	1	1	0	0
0	0	1	1	0	1	0	1	0	1	1	1	0	0	0	0	0	0
0	0	0	0	0	0	0	0	0	0	0	1	0	0	0	1	0	0
0	0	0	0	0	1	0	0	0	0	1	1	0	0	0	1	0	1
0	0	0	0	0	1	0	1	1	1	0	1	0	0	0	1	0	0
0	0	1	1	0	0	0	1	1	1	0	1	0	0	1	1	0	0
0	1	1	1	1	1	0	0	0	1	0	1	0	1	1	1	0	0
0	1	1	0	0	1	0	0	1	1	1	1	0	0	1	1	0	0
1	1	1	1	0	1	0	1	1	1	1	1	0	1	1	1	0	1
1	1	1	1	0	1	1	1	1	1	1	1	0	0	1	1	0	1
0	0	0	1	0	1	0	0	0	1	1	1	0	0	0	0	0	0
0	0	1	0	0	0	0	0	0	1	0	1	0	0	0	0	0	0
0	0	0	0	0	1	0	1	0	1	1	1	0	0	0	1	0	0
0	0	0	0	0	0	0	0	0	0	0	1	0	0	0	1	0	0
0	0	1	0	0	1	0	0	0	0	0	1	0	0	0	0	0	0
0	0	0	0	1	1	0	0	0	0	0	1	0	0	0	1	0	0
0	0	1	0	0	0	0	0	1	1	0	1	0	0	0	1	0	0
0	0	1	0	1	1	0	0	0	1	0	1	0	0	0	1	0	0
0	0	1	1	0	1	0	1	1	1	1	1	0	0	0	1	0	1
0	0	1	1	0	1	0	0	0	1	1	1	0	0	0	0	0	0
1	1	1	1	0	1	0	1	1	1	1	1	0	0	1	1	1	0
0	0	1	0	0	1	0	1	0	0	1	1	0	1	1	0	0	0
0	0	1	0	0	1	0	1	0	1	1	1	0	0	0	1	0	0
0	0	1	0	0	1	0	1	0	1	0	1	0	0	0	1	0	0
1	1	1	0	0	1	0	0	0	1	0	1	0	1	1	0	0	0
1	1	1	0	0	1	0	1	0	1	1	1	0	1	1	1	0	0
0	0	1	0	0	1	0	1	1	1	1	1	0	0	0	1	0	0
1	1	1	0	0	1	0	1	1	1	1	1	0	0	1	1	0	0
0	1	1	0	0	1	0	1	1	1	1	1	0	1	1	1	0	1
1	1	1	1	1	1	1	1	1	1	1	1	0	1	1	1	1	1
1	1	1	1	0	1	0	1	0	1	0	1	0	1	1	1	0	0
0	1	1	1	0	1	0	1	0	0	1	1	0	1	1	1	1	0
1	1	1	0	0	0	0	0	1	1	0	1	0	1	1	0	0	0
1	1	1	0	1	1	0	1	1	1	1	1	0	1	1	1	1	1
0	0	1	1	1	1	0	1	1	1	1	1	0	0	0	0	0	0
0	1	1	0	0	1	0	0	0	1	1	1	0	1	1	1	0	0
1	1	1	1	1	1	0	1	1	1	1	1	0	1	1	1	1	1
0	0	1	0	0	1	0	0	0	0	1	1	0	1	1	1	0	0
0	0	1	1	0	1	0	0	0	0	1	1	0	0	0	1	0	0
0	0	0	0	0	1	0	0	0	1	0	1	0	0	0	0	0	0
0	1	1	1	0	1	0	0	0	1	1	1	0	0	1	1	0	0
1	1	1	0	1	1	0	1	1	1	1	1	0	0	1	1	0	0
0	0	1	0	0	0	0	1	0	1	1	1	0	0	0	1	0	0
0	0	1	1	0	1	1	1	1	1	1	1	0	0	0	0	1	0
0	0	1	0	0	0	0	0	0	1	1	1	0	0	0	1	0	0
0	0	0	1	0	1	0	1	1	1	1	1	0	0	0	0	0	0
0	0	1	0	0	1	0	0	1	1	0	1	0	0	0	0	0	0
0	0	0	0	0	1	0	0	0	0	0	1	0	0	0	1	0	0
0	1	1	0	1	1	0	1	0	1	1	1	0	0	0	1	0	0
0	0	1	0	0	1	0	0	1	1	1	1	0	0	0	1	0	0
0	0	0	0	0	0	0	1	0	0	0	1	0	0	0	1	0	0
1	1	1	0	1	1	0	0	1	1	1	1	0	1	1	1	0	1
0	1	1	0	1	1	0	1	0	1	1	1	0	0	0	1	0	0
0	0	0	1	1	1	1	1	0	1	1	1	0	0	0	0	0	0
0	0	0	0	0	1	0	0	1	1	0	1	0	0	0	0	0	0
1	1	1	0	0	1	0	1	1	1	1	1	0	1	1	1	0	1
0	0	1	1	0	1	0	0	0	1	0	1	0	0	1	1	0	0
0	1	1	1	0	1	1	1	0	1	0	1	0	0	1	1	0	0
0	1	1	0	1	1	0	0	0	0	1	1	0	1	1	1	0	1
0	0	1	0	0	1	0	0	1	1	1	1	0	0	1	1	0	0
0	0	0	1	1	1	1	1	0	1	1	1	0	0	1	1	0	0
0	0	0	0	0	1	0	0	0	0	1	1	0	0	0	1	0	0
1	1	1	0	0	1	0	1	1	1	0	1	0	0	1	1	0	1
1	1	1	1	0	1	0	1	0	1	1	1	0	1	1	1	1	1
0	0	1	0	0	1	0	0	0	0	1	1	0	0	0	1	0	0
0	0	0	1	0	1	1	1	0	1	1	1	0	0	0	0	0	0
0	0	0	0	1	1	0	1	0	0	1	1	0	0	1	1	1	0
1	1	1	1	0	1	0	1	1	1	1	1	0	1	1	1	1	1
0	1	1	0	0	1	0	1	1	1	1	1	0	0	0	1	0	0
0	0	0	0	0	1	0	0	0	0	1	1	0	0	0	1	0	1
0	0	0	1	1	1	1	1	0	1	1	1	0	0	0	1	0	0
0	1	1	1	1	1	0	1	0	1	1	1	0	1	1	1	1	0
0	0	0	0	0	1	0	0	0	0	0	1	0	1	1	1	1	0
0	0	1	0	0	1	0	1	0	0	1	1	0	0	1	1	0	0
0	0	0	0	0	1	0	0	0	0	0	0	0	0	0	0	0	0
0	0	0	0	0	1	0	1	0	0	0	1	0	0	0	0	0	0
1	1	1	1	1	1	0	1	1	1	1	1	0	0	1	1	0	1
1	1	1	0	1	1	0	1	0	1	1	1	0	1	1	1	1	1
0	0	1	0	0	1	0	0	0	1	0	1	0	0	0	0	0	0
0	0	0	0	0	1	0	1	0	1	1	1	0	0	0	1	0	1
1	1	1	0	1	1	0	1	1	1	1	1	0	0	1	1	0	1
0	0	1	1	0	1	0	1	0	0	1	1	0	0	1	1	1	1
0	0	0	0	0	1	0	0	0	0	1	1	0	0	1	1	0	0
0	1	1	0	0	1	0	1	0	0	1	1	0	1	1	1	1	1
0	0	0	0	0	0	0	1	1	1	1	1	0	0	0	0	0	0
1	1	1	0	1	1	0	1	1	1	1	1	0	0	1	1	1	0
0	0	1	0	0	1	0	1	1	1	1	1	0	0	0	1	0	1
0	0	0	0	0	0	0	1	1	1	1	1	0	0	0	1	0	0
1	1	1	0	1	1	0	1	0	1	1	1	0	1	1	1	0	0
0	0	0	0	1	1	0	1	0	0	1	1	0	0	0	0	0	0
0	0	1	1	1	1	1	1	0	1	1	1	0	0	1	1	0	0
0	1	1	1	1	1	1	1	1	1	1	1	0	0	0	1	0	1
1	1	1	1	1	1	0	1	1	1	1	1	0	1	1	1	0	0
0	0	1	0	0	1	0	1	1	1	1	1	0	0	1	0	0	0
0	0	0	1	0	1	0	1	1	1	1	1	0	0	0	0	0	0
0	0	1	0	0	1	0	0	0	1	1	1	0	1	1	1	0	0
0	0	1	0	0	0	0	0	1	1	0	1	0	0	0	1	0	0
0	0	1	0	0	0	0	0	1	1	0	1	0	0	0	1	0	0
0	0	0	0	0	1	0	1	0	0	1	1	0	0	0	0	0	1
0	0	0	0	0	1	0	0	0	1	1	1	0	0	0	0	0	0
0	0	0	0	0	0	0	0	0	1	0	1	0	0	0	1	0	0
1	1	1	0	1	1	0	1	1	1	1	1	0	1	1	1	0	1
0	1	1	0	1	1	0	0	0	1	1	1	0	0	1	1	0	0
1	1	1	0	1	1	0	1	1	1	0	1	0	1	1	1	1	1
[truncated: 8,460 more rows]
