# Supplementary material
Source: ML conference proceedings conference paper supplement (https://proceedings.neurips.cc/paper_files/paper/2022/hash/5afaa8b4dd18eb1eed055d2d821b58ae-Abstract.html)
Supplement: Supplementary file 1 [file 5afaa8b4dd18eb1eed055d2d821b58ae-Supplemental-Conference.zip › 6769_exploring_the_whole_rashomon_s-Supplementary Material/6769_code_repo/experiments/datasets/monk_2/data.csv]

a1_1	a1_2	a2_1	a2_2	a3_1	a4_1	a4_2	a5_1	a5_2	a5_3	a6_1	class_1
1	0	1	0	1	1	0	0	1	0	0	0
1	0	1	0	1	1	0	0	0	0	1	0
1	0	1	0	1	0	1	1	0	0	1	0
1	0	1	0	1	0	1	1	0	0	0	0
1	0	1	0	1	0	1	0	1	0	1	0
1	0	1	0	1	0	1	0	0	1	1	0
1	0	1	0	1	0	1	0	0	0	1	0
1	0	1	0	1	0	0	0	1	0	1	0
1	0	1	0	1	0	0	0	0	0	1	0
1	0	1	0	0	1	0	1	0	0	1	0
1	0	1	0	0	1	0	1	0	0	0	0
1	0	1	0	0	0	1	0	0	1	1	0
1	0	1	0	0	0	1	0	0	0	1	0
1	0	1	0	0	0	1	0	0	0	0	1
1	0	1	0	0	0	0	1	0	0	0	0
1	0	1	0	0	0	0	0	1	0	0	1
1	0	0	1	1	1	0	1	0	0	0	0
1	0	0	1	1	0	1	1	0	0	0	0
1	0	0	1	1	0	1	0	1	0	0	1
1	0	0	1	1	0	1	0	0	1	1	0
1	0	0	1	1	0	1	0	0	1	0	1
1	0	0	1	1	0	1	0	0	0	1	0
1	0	0	1	1	0	0	1	0	0	1	0
1	0	0	1	1	0	0	1	0	0	0	0
1	0	0	1	1	0	0	0	1	0	0	1
1	0	0	1	1	0	0	0	0	1	1	0
1	0	0	1	1	0	0	0	0	1	0	1
1	0	0	1	1	0	0	0	0	0	1	0
1	0	0	1	1	0	0	0	0	0	0	1
1	0	0	1	0	1	0	0	1	0	1	0
1	0	0	1	0	1	0	0	0	0	1	0
1	0	0	1	0	0	1	0	0	1	1	1
1	0	0	1	0	0	1	0	0	0	1	1
1	0	0	1	0	0	0	1	0	0	1	0
1	0	0	1	0	0	0	1	0	0	0	1
1	0	0	1	0	0	0	0	0	1	1	1
1	0	0	1	0	0	0	0	0	1	0	0
1	0	0	1	0	0	0	0	0	0	1	1
1	0	0	1	0	0	0	0	0	0	0	0
1	0	0	0	1	1	0	1	0	0	0	0
1	0	0	0	1	1	0	0	1	0	0	0
1	0	0	0	1	1	0	0	0	1	1	0
1	0	0	0	1	1	0	0	0	1	0	0
1	0	0	0	1	0	1	0	1	0	1	0
1	0	0	0	1	0	1	0	1	0	0	1
1	0	0	0	1	0	1	0	0	1	0	1
1	0	0	0	1	0	1	0	0	0	1	0
1	0	0	0	1	0	0	0	1	0	0	1
1	0	0	0	1	0	0	0	0	1	1	0
1	0	0	0	1	0	0	0	0	0	0	1
1	0	0	0	0	1	0	0	0	1	1	0
1	0	0	0	0	1	0	0	0	1	0	1
1	0	0	0	0	1	0	0	0	0	1	0
1	0	0	0	0	0	1	1	0	0	0	1
1	0	0	0	0	0	1	0	0	1	0	0
1	0	0	0	0	0	1	0	0	0	0	0
1	0	0	0	0	0	0	0	1	0	1	1
0	1	1	0	1	1	0	1	0	0	1	0
0	1	1	0	1	1	0	0	1	0	0	0
0	1	1	0	1	1	0	0	0	1	1	0
0	1	1	0	1	0	1	0	1	0	0	1
0	1	1	0	1	0	0	1	0	0	0	0
0	1	1	0	1	0	0	0	1	0	0	1
0	1	1	0	1	0	0	0	0	1	0	1
0	1	1	0	1	0	0	0	0	0	1	0
0	1	1	0	0	1	0	1	0	0	1	0
0	1	1	0	0	1	0	0	1	0	0	1
0	1	1	0	0	1	0	0	0	0	1	0
0	1	1	0	0	0	1	0	1	0	1	1
0	1	1	0	0	0	1	0	0	0	0	0
0	1	1	0	0	0	0	1	0	0	1	0
0	1	1	0	0	0	0	1	0	0	0	1
0	1	1	0	0	0	0	0	1	0	0	0
0	1	1	0	0	0	0	0	0	1	0	0
0	1	1	0	0	0	0	0	0	0	0	0
0	1	0	1	1	1	0	0	0	1	1	0
0	1	0	1	1	1	0	0	0	0	0	1
0	1	0	1	1	0	1	1	0	0	1	0
0	1	0	1	1	0	1	0	0	1	1	1
0	1	0	1	1	0	0	0	0	1	1	1
0	1	0	1	1	0	0	0	0	1	0	0
0	1	0	1	1	0	0	0	0	0	1	1
0	1	0	1	0	1	0	1	0	0	1	0
0	1	0	1	0	1	0	0	1	0	0	0
0	1	0	1	0	1	0	0	0	1	0	0
0	1	0	1	0	1	0	0	0	0	1	1
0	1	0	1	0	1	0	0	0	0	0	0
0	1	0	1	0	0	1	1	0	0	1	1
0	1	0	1	0	0	1	0	1	0	0	0
0	1	0	1	0	0	1	0	0	1	1	0
0	1	0	1	0	0	0	1	0	0	1	1
0	1	0	1	0	0	0	0	1	0	1	0
0	1	0	1	0	0	0	0	1	0	0	0
0	1	0	1	0	0	0	0	0	0	0	0
0	1	0	0	1	1	0	1	0	0	1	0
0	1	0	0	1	1	0	1	0	0	0	0
0	1	0	0	1	1	0	0	0	1	0	1
0	1	0	0	1	0	1	1	0	0	1	0
0	1	0	0	1	0	1	0	0	1	1	1
0	1	0	0	1	0	1	0	0	1	0	0
0	1	0	0	1	0	1	0	0	0	0	0
0	1	0	0	1	0	0	1	0	0	0	1
0	1	0	0	1	0	0	0	1	0	1	1
0	1	0	0	1	0	0	0	0	0	1	1
0	1	0	0	0	1	0	1	0	0	0	1
0	1	0	0	0	1	0	0	1	0	1	1
0	1	0	0	0	1	0	0	0	1	1	1
0	1	0	0	0	1	0	0	0	0	0	0
0	1	0	0	0	0	1	1	0	0	1	1
0	1	0	0	0	0	1	0	1	0	1	0
0	1	0	0	0	0	1	0	0	1	0	0
0	1	0	0	0	0	0	0	0	1	1	0
0	1	0	0	0	0	0	0	0	1	0	0
0	1	0	0	0	0	0	0	0	0	0	0
0	0	1	0	1	1	0	0	0	0	1	0
0	0	1	0	1	0	1	1	0	0	0	0
0	0	1	0	1	0	1	0	1	0	0	1
0	0	1	0	1	0	1	0	0	1	0	1
0	0	1	0	1	0	1	0	0	0	1	0
0	0	1	0	1	0	1	0	0	0	0	1
0	0	1	0	1	0	0	1	0	0	1	0
0	0	1	0	1	0	0	1	0	0	0	0
0	0	1	0	1	0	0	0	1	0	0	1
0	0	1	0	1	0	0	0	0	1	0	1
0	0	1	0	0	1	0	1	0	0	1	0
0	0	1	0	0	1	0	0	1	0	0	1
0	0	1	0	0	1	0	0	0	1	1	0
0	0	1	0	0	1	0	0	0	1	0	1
0	0	1	0	0	1	0	0	0	0	1	0
0	0	1	0	0	1	0	0	0	0	0	1
0	0	1	0	0	0	1	0	1	0	1	1
0	0	1	0	0	0	0	1	0	0	0	1
0	0	1	0	0	0	0	0	1	0	1	1
0	0	1	0	0	0	0	0	1	0	0	0
0	0	1	0	0	0	0	0	0	0	0	0
0	0	0	1	1	1	0	1	0	0	0	0
0	0	0	1	1	1	0	0	1	0	0	1
0	0	0	1	1	1	0	0	0	1	1	0
0	0	0	1	1	1	0	0	0	1	0	1
0	0	0	1	1	0	1	1	0	0	0	1
0	0	0	1	1	0	1	0	1	0	1	1
0	0	0	1	1	0	0	1	0	0	1	0
0	0	0	1	1	0	0	0	1	0	1	1
0	0	0	1	1	0	0	0	0	1	1	1
0	0	0	1	1	0	0	0	0	1	0	0
0	0	0	1	0	1	0	1	0	0	1	0
0	0	0	1	0	1	0	0	1	0	0	0
0	0	0	1	0	1	0	0	0	1	1	1
0	0	0	1	0	1	0	0	0	1	0	0
0	0	0	1	0	0	1	1	0	0	1	1
0	0	0	1	0	0	1	0	1	0	1	0
0	0	0	1	0	0	1	0	1	0	0	0
0	0	0	1	0	0	1	0	0	1	0	0
0	0	0	1	0	0	0	1	0	0	1	1
0	0	0	1	0	0	0	0	0	1	0	0
0	0	0	1	0	0	0	0	0	0	0	0
0	0	0	0	1	1	0	1	0	0	1	0
0	0	0	0	1	1	0	0	1	0	1	0
0	0	0	0	1	1	0	0	0	1	1	0
0	0	0	0	1	1	0	0	0	1	0	1
0	0	0	0	1	0	1	0	0	1	0	0
0	0	0	0	0	1	0	1	0	0	1	0
0	0	0	0	0	0	1	1	0	0	1	1
0	0	0	0	0	0	1	0	1	0	1	0
0	0	0	0	0	0	1	0	0	1	1	0
0	0	0	0	0	0	1	0	0	1	0	0
0	0	0	0	0	0	0	1	0	0	1	1
0	0	0	0	0	0	0	0	1	0	1	0
0	0	0	0	0	0	0	0	0	0	0	0
