# Supplementary material
Source: ML conference proceedings conference paper supplement (https://proceedings.neurips.cc/paper_files/paper/2022/hash/5afaa8b4dd18eb1eed055d2d821b58ae-Abstract.html)
Supplement: Supplementary file 1 [file 5afaa8b4dd18eb1eed055d2d821b58ae-Supplemental-Conference.zip › 6769_exploring_the_whole_rashomon_s-Supplementary Material/6769_code_repo/experiments/datasets/penguin/data_binary.csv]

island_Biscoe	island_Dream	bill_length_mm_(32.099000000000004-40.867]	bill_length_mm_(40.867-46.8]	bill_depth_mm_(13.099-16.2]	bill_depth_mm_(16.2-18.3]	flipper_length_mm_(171.999-192.0]	flipper_length_mm_(192.0-209.0]	body_mass_g_(2699.999-3700.0]	body_mass_g_(3700.0-4550.0]	sex_female	year_2007	year_2008	target
0	0	1	0	0	0	1	0	0	1	0	1	0	Adelie
0	0	1	0	0	1	1	0	0	1	1	1	0	Adelie
0	0	1	0	0	1	0	1	1	0	1	1	0	Adelie
0	0	1	0	0	0	0	1	1	0	1	1	0	Adelie
0	0	1	0	0	0	1	0	1	0	0	1	0	Adelie
0	0	1	0	0	1	1	0	1	0	1	1	0	Adelie
0	0	1	0	0	0	0	1	0	0	0	1	0	Adelie
0	0	0	1	0	1	1	0	1	0	1	1	0	Adelie
0	0	1	0	0	0	1	0	0	1	0	1	0	Adelie
0	0	1	0	0	0	0	1	0	1	0	1	0	Adelie
0	0	1	0	0	1	1	0	1	0	1	1	0	Adelie
0	0	1	0	0	0	0	1	1	0	1	1	0	Adelie
0	0	0	1	0	0	0	1	0	1	0	1	0	Adelie
0	0	1	0	0	0	1	0	1	0	1	1	0	Adelie
0	0	0	1	0	0	0	1	0	1	0	1	0	Adelie
1	0	1	0	0	1	1	0	1	0	1	1	0	Adelie
1	0	1	0	0	0	1	0	1	0	0	1	0	Adelie
1	0	1	0	0	0	1	0	0	1	1	1	0	Adelie
1	0	1	0	0	1	1	0	0	1	0	1	0	Adelie
1	0	1	0	0	1	1	0	0	1	0	1	0	Adelie
1	0	1	0	0	0	1	0	0	1	1	1	0	Adelie
1	0	1	0	0	0	1	0	1	0	0	1	0	Adelie
1	0	1	0	0	1	1	0	1	0	1	1	0	Adelie
1	0	1	0	0	0	1	0	1	0	1	1	0	Adelie
1	0	1	0	0	0	1	0	0	1	0	1	0	Adelie
0	1	1	0	0	1	1	0	1	0	1	1	0	Adelie
0	1	1	0	0	1	1	0	0	1	0	1	0	Adelie
0	1	1	0	0	1	1	0	1	0	1	1	0	Adelie
0	1	0	1	0	0	1	0	0	1	0	1	0	Adelie
0	1	1	0	0	1	0	1	1	0	1	1	0	Adelie
0	1	1	0	0	0	0	1	0	1	0	1	0	Adelie
0	1	1	0	0	0	1	0	0	1	0	1	0	Adelie
0	1	0	1	0	0	1	0	1	0	1	1	0	Adelie
0	1	1	0	0	0	1	0	1	0	1	1	0	Adelie
0	1	1	0	0	0	1	0	0	0	0	1	0	Adelie
0	1	1	0	0	1	1	0	1	0	1	1	0	Adelie
0	1	1	0	0	0	0	1	0	1	0	1	0	Adelie
0	1	1	0	0	0	1	0	1	0	1	1	0	Adelie
0	1	0	1	0	0	0	1	0	1	0	1	0	Adelie
0	1	1	0	0	1	1	0	1	0	1	1	0	Adelie
0	1	1	0	0	0	1	0	0	0	0	1	0	Adelie
0	1	0	1	0	0	1	0	1	0	0	1	0	Adelie
0	1	1	0	0	1	1	0	1	0	1	1	0	Adelie
0	1	0	1	0	0	1	0	0	1	0	1	0	Adelie
1	0	1	0	0	1	1	0	1	0	1	0	1	Adelie
1	0	1	0	0	0	1	0	0	1	0	0	1	Adelie
1	0	1	0	0	1	1	0	1	0	1	0	1	Adelie
1	0	0	1	0	0	0	1	0	1	0	0	1	Adelie
1	0	1	0	0	1	1	0	1	0	1	0	1	Adelie
1	0	0	1	0	0	1	0	1	0	0	0	1	Adelie
1	0	1	0	0	1	1	0	1	0	1	0	1	Adelie
1	0	1	0	0	0	0	1	0	1	0	0	1	Adelie
1	0	1	0	0	1	1	0	1	0	1	0	1	Adelie
1	0	1	0	0	0	0	1	0	1	0	0	1	Adelie
1	0	1	0	0	1	1	0	1	0	1	0	1	Adelie
1	0	0	1	0	0	0	1	0	1	0	0	1	Adelie
1	0	1	0	0	1	1	0	1	0	1	0	1	Adelie
1	0	0	1	0	1	1	0	0	1	0	0	1	Adelie
1	0	1	0	0	1	1	0	1	0	1	0	1	Adelie
1	0	0	1	0	1	1	0	0	1	0	0	1	Adelie
1	0	1	0	1	0	0	1	1	0	1	0	1	Adelie
1	0	0	1	0	0	1	0	0	1	0	0	1	Adelie
0	0	1	0	0	1	1	0	1	0	1	0	1	Adelie
0	0	0	1	0	0	0	1	0	1	0	0	1	Adelie
0	0	1	0	0	0	1	0	1	0	1	0	1	Adelie
0	0	1	0	0	0	1	0	0	1	0	0	1	Adelie
0	0	1	0	0	1	0	1	1	0	1	0	1	Adelie
0	0	0	1	0	0	0	1	0	1	0	0	1	Adelie
0	0	1	0	0	1	1	0	1	0	1	0	1	Adelie
0	0	0	1	0	0	0	1	0	1	0	0	1	Adelie
0	0	0	1	0	1	1	0	1	0	1	0	1	Adelie
0	0	1	0	0	0	1	0	0	1	0	0	1	Adelie
0	0	1	0	1	0	1	0	1	0	1	0	1	Adelie
0	0	0	1	0	0	0	1	0	1	0	0	1	Adelie
0	0	1	0	0	1	1	0	1	0	1	0	1	Adelie
0	0	0	1	0	1	0	1	0	0	0	0	1	Adelie
0	0	1	0	0	0	1	0	0	1	1	0	1	Adelie
0	0	1	0	0	0	0	1	0	1	0	0	1	Adelie
0	1	1	0	0	1	1	0	1	0	1	0	1	Adelie
0	1	0	1	0	0	0	1	1	0	0	0	1	Adelie
0	1	1	0	0	0	1	0	0	1	0	0	1	Adelie
0	1	1	0	0	0	1	0	1	0	1	0	1	Adelie
0	1	1	0	0	0	1	0	0	1	0	0	1	Adelie
0	1	1	0	0	0	1	0	1	0	1	0	1	Adelie
0	1	1	0	0	1	0	1	1	0	1	0	1	Adelie
0	1	0	1	0	1	0	1	0	1	0	0	1	Adelie
0	1	1	0	0	1	1	0	1	0	1	0	1	Adelie
0	1	1	0	0	1	1	0	0	1	0	0	1	Adelie
0	1	1	0	0	1	1	0	1	0	1	0	1	Adelie
0	1	1	0	0	0	0	1	0	1	0	0	1	Adelie
0	1	1	0	0	0	1	0	1	0	1	0	1	Adelie
0	1	1	0	0	0	0	1	0	1	0	0	1	Adelie
0	1	1	0	1	0	1	0	1	0	1	0	1	Adelie
0	1	0	1	0	0	1	0	0	1	0	0	1	Adelie
1	0	1	0	0	1	1	0	0	1	1	0	0	Adelie
1	0	0	1	0	0	0	1	0	0	0	0	0	Adelie
1	0	1	0	1	0	1	0	1	0	1	0	0	Adelie
1	0	1	0	0	0	1	0	0	1	0	0	0	Adelie
1	0	1	0	0	0	0	1	1	0	1	0	0	Adelie
1	0	1	0	0	0	1	0	1	0	0	0	0	Adelie
1	0	1	0	0	1	0	1	0	1	1	0	0	Adelie
1	0	1	0	0	0	1	0	0	1	0	0	0	Adelie
1	0	1	0	0	1	1	0	1	0	1	0	0	Adelie
1	0	0	1	0	0	0	1	0	0	0	0	0	Adelie
1	0	1	0	0	1	0	1	0	1	1	0	0	Adelie
1	0	0	1	0	0	1	0	0	0	0	0	0	Adelie
1	0	1	0	0	1	0	1	1	0	1	0	0	Adelie
1	0	0	1	0	0	0	1	0	1	0	0	0	Adelie
1	0	1	0	0	0	1	0	0	1	1	0	0	Adelie
1	0	0	1	0	1	0	1	0	1	0	0	0	Adelie
0	0	1	0	0	1	1	0	1	0	1	0	0	Adelie
0	0	1	0	0	0	0	1	0	1	0	0	0	Adelie
0	0	1	0	0	1	1	0	1	0	1	0	0	Adelie
0	0	0	1	0	0	1	0	1	0	0	0	0	Adelie
0	0	1	0	0	1	1	0	1	0	1	0	0	Adelie
0	0	1	0	0	0	0	1	1	0	0	0	0	Adelie
0	0	1	0	0	1	1	0	1	0	1	0	0	Adelie
0	0	0	1	0	0	0	1	0	1	0	0	0	Adelie
0	0	1	0	1	0	1	0	1	0	1	0	0	Adelie
0	0	1	0	0	0	0	1	0	1	0	0	0	Adelie
0	0	1	0	0	1	1	0	1	0	1	0	0	Adelie
0	0	0	1	0	1	0	1	0	1	0	0	0	Adelie
0	0	1	0	0	1	1	0	1	0	1	0	0	Adelie
0	0	0	1	0	1	0	0	0	1	0	0	0	Adelie
0	0	1	0	0	1	1	0	1	0	1	0	0	Adelie
0	0	0	1	0	0	0	1	1	0	0	0	0	Adelie
0	1	1	0	0	0	0	1	1	0	1	0	0	Adelie
0	1	1	0	0	0	0	1	0	1	0	0	0	Adelie
0	1	1	0	0	1	1	0	1	0	1	0	0	Adelie
0	1	0	1	0	1	1	0	0	1	0	0	0	Adelie
0	1	1	0	0	1	1	0	1	0	1	0	0	Adelie
0	1	1	0	0	0	0	1	0	1	0	0	0	Adelie
0	1	1	0	0	1	1	0	1	0	1	0	0	Adelie
0	1	1	0	0	1	0	1	0	1	0	0	0	Adelie
0	1	1	0	0	1	0	1	1	0	1	0	0	Adelie
0	1	1	0	0	1	1	0	1	0	0	0	0	Adelie
0	1	1	0	1	0	1	0	1	0	1	0	0	Adelie
0	1	1	0	0	1	1	0	0	1	0	0	0	Adelie
0	1	1	0	0	1	1	0	1	0	1	0	0	Adelie
0	1	1	0	0	0	1	0	1	0	0	0	0	Adelie
0	1	1	0	0	0	1	0	0	1	0	0	0	Adelie
0	1	1	0	0	0	1	0	1	0	1	0	0	Adelie
0	1	1	0	0	1	0	1	1	0	1	0	0	Adelie
0	1	1	0	0	1	0	1	0	1	0	0	0	Adelie
0	1	1	0	0	1	1	0	1	0	1	0	0	Adelie
0	1	0	1	0	0	0	1	0	1	0	0	0	Adelie
1	0	0	1	1	0	0	0	0	1	1	1	0	Gentoo
1	0	0	0	0	1	0	0	0	0	0	1	0	Gentoo
1	0	0	0	1	0	0	0	0	1	1	1	0	Gentoo
1	0	0	0	1	0	0	0	0	0	0	1	0	Gentoo
1	0	0	0	1	0	0	0	0	0	0	1	0	Gentoo
1	0	0	1	1	0	0	0	0	1	1	1	0	Gentoo
1	0	0	1	1	0	0	0	0	0	1	1	0	Gentoo
1	0	0	1	1	0	0	0	0	0	0	1	0	Gentoo
1	0	0	1	1	0	0	1	0	1	1	1	0	Gentoo
1	0	0	1	1	0	0	0	0	0	0	1	0	Gentoo
1	0	0	1	1	0	0	0	0	0	1	1	0	Gentoo
1	0	0	0	1	0	0	0	0	0	0	1	0	Gentoo
1	0	0	1	1	0	0	0	0	0	1	1	0	Gentoo
1	0	0	0	1	0	0	0	0	0	0	1	0	Gentoo
1	0	0	1	1	0	0	0	0	1	1	1	0	Gentoo
1	0	0	0	1	0	0	0	0	0	0	1	0	Gentoo
1	0	0	1	1	0	0	0	0	1	1	1	0	Gentoo
1	0	0	0	1	0	0	0	0	0	0	1	0	Gentoo
1	0	0	1	1	0	0	1	0	0	1	1	0	Gentoo
1	0	0	0	1	0	0	0	0	0	0	1	0	Gentoo
1	0	0	0	1	0	0	0	0	0	0	1	0	Gentoo
1	0	0	1	1	0	0	0	0	0	1	1	0	Gentoo
1	0	0	1	1	0	0	0	0	1	1	1	0	Gentoo
1	0	0	1	1	0	0	0	0	0	0	1	0	Gentoo
1	0	0	1	1	0	0	0	0	0	1	1	0	Gentoo
1	0	0	1	1	0	0	0	0	0	0	1	0	Gentoo
1	0	0	0	1	0	0	0	0	0	0	1	0	Gentoo
1	0	0	0	1	0	0	0	0	0	1	1	0	Gentoo
1	0	0	0	1	0	0	0	0	0	0	1	0	Gentoo
1	0	0	0	1	0	0	0	0	0	0	1	0	Gentoo
1	0	0	1	1	0	0	1	0	0	1	1	0	Gentoo
1	0	0	1	1	0	0	1	0	0	1	1	0	Gentoo
1	0	0	0	0	1	0	0	0	0	0	1	0	Gentoo
1	0	0	0	1	0	0	0	0	0	1	0	1	Gentoo
1	0	0	0	0	1	0	0	0	0	0	0	1	Gentoo
1	0	0	1	1	0	0	0	0	0	1	0	1	Gentoo
1	0	0	1	0	1	0	0	0	0	0	0	1	Gentoo
1	0	0	1	1	0	0	1	0	1	1	0	1	Gentoo
1	0	0	0	1	0	0	1	0	0	0	0	1	Gentoo
1	0	0	1	1	0	0	1	0	1	1	0	1	Gentoo
1	0	0	0	1	0	0	0	0	0	0	0	1	Gentoo
1	0	0	1	1	0	0	0	0	1	1	0	1	Gentoo
1	0	0	0	1	0	0	0	0	0	0	0	1	Gentoo
1	0	0	0	1	0	0	0	0	0	0	0	1	Gentoo
1	0	0	1	1	0	0	0	0	0	1	0	1	Gentoo
1	0	0	1	1	0	0	0	0	1	1	0	1	Gentoo
1	0	0	0	1	0	0	0	0	0	0	0	1	Gentoo
1	0	0	1	1	0	0	0	0	0	1	0	1	Gentoo
1	0	0	1	1	0	0	0	0	0	0	0	1	Gentoo
1	0	0	1	1	0	0	0	0	0	1	0	1	Gentoo
1	0	0	0	1	0	0	0	0	0	0	0	1	Gentoo
1	0	0	1	1	0	0	0	0	1	1	0	1	Gentoo
1	0	0	0	1	0	0	0	0	0	0	0	1	Gentoo
1	0	0	1	1	0	0	0	0	0	1	0	1	Gentoo
1	0	0	1	1	0	0	0	0	0	0	0	1	Gentoo
1	0	0	1	1	0	0	1	0	1	1	0	1	Gentoo
1	0	0	1	1	0	0	0	0	0	0	0	1	Gentoo
1	0	0	1	1	0	0	1	0	1	1	0	1	Gentoo
1	0	0	0	1	0	0	0	0	0	0	0	1	Gentoo
1	0	0	1	1	0	0	1	0	1	1	0	1	Gentoo
1	0	0	1	1	0	0	0	0	0	0	0	1	Gentoo
1	0	0	1	1	0	0	0	0	1	1	0	1	Gentoo
1	0	0	0	1	0	0	0	0	0	0	0	1	Gentoo
1	0	0	1	1	0	0	0	0	0	1	0	1	Gentoo
1	0	0	0	0	1	0	0	0	0	0	0	1	Gentoo
1	0	0	0	1	0	0	0	0	0	0	0	1	Gentoo
1	0	0	1	1	0	0	0	0	0	1	0	1	Gentoo
1	0	0	0	1	0	0	0	0	0	0	0	1	Gentoo
1	0	0	0	1	0	0	0	0	0	1	0	1	Gentoo
1	0	0	1	1	0	0	0	0	0	0	0	1	Gentoo
1	0	0	0	1	0	0	0	0	0	0	0	1	Gentoo
1	0	0	1	1	0	0	0	0	0	1	0	1	Gentoo
1	0	0	1	1	0	0	0	0	0	1	0	1	Gentoo
1	0	0	0	1	0	0	0	0	0	0	0	1	Gentoo
1	0	0	0	1	0	0	1	0	0	1	0	1	Gentoo
1	0	0	0	0	1	0	0	0	0	0	0	1	Gentoo
1	0	0	1	1	0	0	0	0	0	1	0	1	Gentoo
1	0	0	1	0	1	0	0	0	0	0	0	1	Gentoo
1	0	0	0	1	0	0	0	0	0	1	0	0	Gentoo
1	0	0	0	1	0	0	0	0	0	0	0	0	Gentoo
1	0	0	0	1	0	0	0	0	0	1	0	0	Gentoo
1	0	0	0	1	0	0	0	0	0	0	0	0	Gentoo
1	0	0	1	1	0	0	0	0	0	1	0	0	Gentoo
1	0	0	0	0	1	0	0	0	0	0	0	0	Gentoo
1	0	0	1	1	0	0	0	0	0	1	0	0	Gentoo
1	0	0	0	1	0	0	0	0	0	0	0	0	Gentoo
1	0	0	0	1	0	0	0	0	0	1	0	0	Gentoo
1	0	0	0	0	1	0	0	0	0	0	0	0	Gentoo
1	0	0	0	1	0	0	0	0	0	1	0	0	Gentoo
1	0	0	0	0	1	0	0	0	0	0	0	0	Gentoo
1	0	0	1	1	0	0	0	0	0	1	0	0	Gentoo
1	0	0	0	1	0	0	0	0	0	0	0	0	Gentoo
1	0	0	1	1	0	0	0	0	0	1	0	0	Gentoo
1	0	0	0	1	0	0	0	0	0	0	0	0	Gentoo
1	0	0	0	1	0	0	0	0	0	0	0	0	Gentoo
1	0	0	0	1	0	0	0	0	0	1	0	0	Gentoo
1	0	0	0	1	0	0	1	0	0	1	0	0	Gentoo
1	0	0	0	0	1	0	0	0	0	0	0	0	Gentoo
1	0	0	0	1	0	0	0	0	0	1	0	0	Gentoo
1	0	0	0	0	1	0	0	0	0	0	0	0	Gentoo
1	0	0	0	1	0	0	0	0	0	1	0	0	Gentoo
1	0	0	0	1	0	0	0	0	0	0	0	0	Gentoo
1	0	0	1	1	0	0	0	0	0	0	0	0	Gentoo
1	0	0	1	1	0	0	0	0	0	1	0	0	Gentoo
1	0	0	0	1	0	0	0	0	0	0	0	0	Gentoo
1	0	0	1	1	0	0	1	0	0	1	0	0	Gentoo
1	0	0	0	1	0	0	1	0	0	0	0	0	Gentoo
1	0	0	0	1	0	0	0	0	0	1	0	0	Gentoo
1	0	0	0	1	0	0	0	0	0	0	0	0	Gentoo
1	0	0	1	1	0	0	0	0	0	1	0	0	Gentoo
1	0	0	0	0	1	0	0	0	0	0	0	0	Gentoo
1	0	0	1	1	0	0	0	0	1	1	0	0	Gentoo
1	0	0	0	1	0	0	0	0	0	0	0	0	Gentoo
1	0	0	0	1	0	0	0	0	0	0	0	0	Gentoo
1	0	0	0	1	0	0	0	0	0	1	0	0	Gentoo
1	0	0	1	1	0	0	0	0	0	1	0	0	Gentoo
1	0	0	0	1	0	0	0	0	0	0	0	0	Gentoo
1	0	0	1	1	0	0	0	0	0	1	0	0	Gentoo
1	0	0	0	1	0	0	0	0	0	0	0	0	Gentoo
0	1	0	1	0	1	1	0	1	0	1	1	0	Chinstrap
0	1	0	0	0	0	0	1	0	1	0	1	0	Chinstrap
0	1	0	0	0	0	0	1	1	0	0	1	0	Chinstrap
0	1	0	1	0	0	1	0	1	0	1	1	0	Chinstrap
0	1	0	0	0	0	0	1	0	1	0	1	0	Chinstrap
0	1	0	1	0	1	0	1	0	1	1	1	0	Chinstrap
0	1	0	1	0	1	1	0	1	0	1	1	0	Chinstrap
0	1	0	0	0	1	0	1	0	1	0	1	0	Chinstrap
0	1	0	1	0	0	0	1	0	1	1	1	0	Chinstrap
0	1	0	0	0	0	0	1	1	0	0	1	0	Chinstrap
0	1	0	1	0	1	0	1	0	1	1	1	0	Chinstrap
0	1	0	0	0	0	0	1	0	1	0	1	0	Chinstrap
0	1	0	0	0	1	1	0	1	0	1	1	0	Chinstrap
0	1	0	0	0	1	0	1	0	1	0	1	0	Chinstrap
0	1	0	1	0	1	1	0	1	0	1	1	0	Chinstrap
0	1	0	0	0	0	0	1	0	1	0	1	0	Chinstrap
0	1	0	0	0	0	0	1	1	0	0	1	0	Chinstrap
0	1	0	0	0	1	1	0	1	0	1	1	0	Chinstrap
0	1	0	1	0	0	1	0	1	0	1	1	0	Chinstrap
0	1	0	0	0	1	0	1	0	1	0	1	0	Chinstrap
0	1	0	1	0	1	1	0	1	0	1	1	0	Chinstrap
0	1	0	0	0	1	1	0	1	0	0	1	0	Chinstrap
0	1	0	1	0	1	1	0	1	0	1	1	0	Chinstrap
0	1	0	0	0	0	0	1	0	1	0	1	0	Chinstrap
0	1	0	1	0	1	0	1	1	0	1	1	0	Chinstrap
0	1	0	0	0	0	0	1	0	1	0	1	0	Chinstrap
0	1	0	0	0	0	0	1	1	0	1	0	1	Chinstrap
0	1	0	0	0	0	0	1	0	1	0	0	1	Chinstrap
0	1	0	1	0	1	1	0	1	0	1	0	1	Chinstrap
0	1	0	0	0	0	0	1	0	1	0	0	1	Chinstrap
0	1	0	1	0	1	1	0	1	0	1	0	1	Chinstrap
0	1	0	0	0	0	0	1	0	1	0	0	1	Chinstrap
0	1	0	1	0	1	1	0	1	0	1	0	1	Chinstrap
0	1	0	0	0	0	0	1	0	1	0	0	1	Chinstrap
0	1	0	0	0	0	0	1	1	0	0	0	1	Chinstrap
0	1	0	0	0	1	0	1	0	1	1	0	1	Chinstrap
0	1	0	0	0	1	0	1	0	1	1	0	1	Chinstrap
0	1	0	0	0	0	0	0	0	0	0	0	1	Chinstrap
0	1	0	0	0	1	1	0	1	0	1	0	1	Chinstrap
0	1	0	0	0	0	0	1	0	1	0	0	1	Chinstrap
0	1	0	0	0	0	0	0	0	1	0	0	1	Chinstrap
0	1	0	1	0	1	1	0	1	0	1	0	1	Chinstrap
0	1	0	0	0	0	0	1	1	0	0	0	1	Chinstrap
0	1	0	1	0	1	0	1	1	0	1	0	1	Chinstrap
0	1	0	0	0	1	0	1	1	0	1	0	0	Chinstrap
0	1	0	0	0	0	0	1	0	1	0	0	0	Chinstrap
0	1	0	0	0	1	1	0	1	0	1	0	0	Chinstrap
0	1	0	0	0	0	0	0	0	1	0	0	0	Chinstrap
0	1	0	0	0	0	1	0	1	0	0	0	0	Chinstrap
0	1	0	0	0	1	0	1	1	0	1	0	0	Chinstrap
0	1	0	0	0	1	0	1	1	0	1	0	0	Chinstrap
0	1	0	0	0	0	0	1	0	1	0	0	0	Chinstrap
0	1	0	1	0	1	0	1	1	0	1	0	0	Chinstrap
0	1	0	0	0	0	0	1	0	1	0	0	0	Chinstrap
0	1	0	1	0	1	1	0	1	0	1	0	0	Chinstrap
0	1	0	0	0	0	0	1	1	0	0	0	0	Chinstrap
0	1	0	1	0	1	1	0	1	0	1	0	0	Chinstrap
0	1	0	0	0	0	0	1	0	1	0	0	0	Chinstrap
0	1	0	0	0	0	0	1	0	1	0	0	0	Chinstrap
0	1	0	1	0	0	0	1	1	0	1	0	0	Chinstrap
0	1	0	0	0	0	0	1	0	1	0	0	0	Chinstrap
0	1	0	1	0	1	1	0	1	0	1	0	0	Chinstrap
0	1	0	1	0	1	0	1	1	0	1	0	0	Chinstrap
0	1	0	0	0	0	0	1	0	1	0	0	0	Chinstrap
0	1	0	1	0	1	0	1	1	0	1	0	0	Chinstrap
0	1	0	0	0	1	0	1	0	1	0	0	0	Chinstrap
0	1	0	0	0	0	0	0	0	1	0	0	0	Chinstrap
0	1	0	0	0	0	0	1	0	1	1	0	0	Chinstrap
