# Supplementary material
Source: ML conference proceedings conference paper supplement (https://proceedings.neurips.cc/paper_files/paper/2022/hash/5afaa8b4dd18eb1eed055d2d821b58ae-Abstract.html)
Supplement: Supplementary file 1 [file 5afaa8b4dd18eb1eed055d2d821b58ae-Supplemental-Conference.zip › 6769_exploring_the_whole_rashomon_s-Supplementary Material/6769_code_repo/experiments/datasets/vote/data_binary.csv]

handicapped-infants_n	handicapped-infants_y	water-project-cost-sharing_n	water-project-cost-sharing_y	adoption-of-the-budget-resolution_n	adoption-of-the-budget-resolution_y	physician-fee-freeze_n	physician-fee-freeze_y	el-salvador-aid_n	el-salvador-aid_y	religious-groups-in-schools_n	religious-groups-in-schools_y	anti-satellite-test-ban_n	anti-satellite-test-ban_y	aid-to-nicaraguan-contras_n	aid-to-nicaraguan-contras_y	mx-missile_n	mx-missile_y	immigration_n	immigration_y	synfuels-corporation-cutback_n	synfuels-corporation-cutback_y	education-spending_n	education-spending_y	superfund-right-to-sue_n	superfund-right-to-sue_y	crime_n	crime_y	duty-free-exports_n	duty-free-exports_y	export-administration-act-south-africa_n	export-administration-act-south-africa_y	y
1	0	0	1	1	0	0	1	0	1	0	1	1	0	1	0	1	0	0	1	0	0	0	1	0	1	0	1	1	0	0	1	0
1	0	0	1	1	0	0	1	0	1	0	1	1	0	1	0	1	0	1	0	1	0	0	1	0	1	0	1	1	0	0	0	0
0	0	0	1	0	1	0	0	0	1	0	1	1	0	1	0	1	0	1	0	0	1	1	0	0	1	0	1	1	0	1	0	1
1	0	0	1	0	1	1	0	0	0	0	1	1	0	1	0	1	0	1	0	0	1	1	0	0	1	1	0	1	0	0	1	1
0	1	0	1	0	1	1	0	0	1	0	1	1	0	1	0	1	0	1	0	0	1	0	0	0	1	0	1	0	1	0	1	1
1	0	0	1	0	1	1	0	0	1	0	1	1	0	1	0	1	0	1	0	1	0	1	0	0	1	0	1	0	1	0	1	1
1	0	0	1	1	0	0	1	0	1	0	1	1	0	1	0	1	0	1	0	1	0	1	0	0	0	0	1	0	1	0	1	1
1	0	0	1	1	0	0	1	0	1	0	1	1	0	1	0	1	0	1	0	1	0	1	0	0	1	0	1	0	0	0	1	0
1	0	0	1	1	0	0	1	0	1	0	1	1	0	1	0	1	0	1	0	1	0	0	1	0	1	0	1	1	0	0	1	0
0	1	0	1	0	1	1	0	1	0	1	0	0	1	0	1	0	1	1	0	1	0	1	0	1	0	1	0	0	0	0	0	1
1	0	0	1	1	0	0	1	0	1	1	0	1	0	1	0	1	0	1	0	0	0	0	0	0	1	0	1	1	0	1	0	0
1	0	0	1	1	0	0	1	0	1	0	1	1	0	1	0	1	0	1	0	0	1	0	0	0	1	0	1	0	0	0	0	0
1	0	0	1	0	1	1	0	1	0	1	0	0	1	0	1	0	1	1	0	1	0	1	0	0	1	1	0	0	0	0	0	1
0	1	0	1	0	1	1	0	1	0	0	1	0	1	0	1	0	0	0	1	0	1	0	0	1	0	1	0	0	1	0	0	1
1	0	0	1	1	0	0	1	0	1	0	1	1	0	1	0	1	0	1	0	1	0	0	1	0	0	0	0	1	0	0	0	0
1	0	0	1	1	0	0	1	0	1	0	1	1	0	1	0	1	0	0	1	1	0	0	1	0	1	0	0	1	0	0	0	0
0	1	1	0	0	1	1	0	1	0	0	1	1	0	0	1	0	0	0	1	0	1	0	1	0	0	1	0	1	0	0	1	1
0	1	0	0	0	1	1	0	1	0	1	0	0	1	0	1	0	1	1	0	1	0	1	0	0	1	1	0	0	1	0	1	1
1	0	0	1	1	0	0	1	0	1	0	1	1	0	1	0	1	0	1	0	1	0	0	0	0	1	0	1	1	0	1	0	0
0	1	0	1	0	1	1	0	1	0	1	0	0	1	0	1	0	1	1	0	0	1	1	0	1	0	1	0	0	1	0	1	1
0	1	0	1	0	1	1	0	1	0	0	0	0	1	0	1	1	0	1	0	0	1	1	0	1	0	1	0	0	1	0	1	1
0	1	0	1	0	1	1	0	1	0	1	0	0	1	0	1	0	1	1	0	1	0	1	0	0	0	0	0	0	1	0	1	1
0	1	0	0	0	1	1	0	1	0	1	0	0	1	0	1	0	1	1	0	1	0	0	0	1	0	1	0	0	1	0	1	1
0	1	0	1	0	1	1	0	1	0	1	0	0	1	0	1	0	1	1	0	1	0	1	0	1	0	1	0	0	1	0	1	1
0	1	1	0	0	1	1	0	1	0	1	0	0	1	0	1	0	1	1	0	1	0	1	0	1	0	1	0	0	1	0	0	1
0	1	1	0	0	1	1	0	1	0	1	0	0	1	0	1	0	1	0	1	1	0	1	0	1	0	1	0	0	1	0	1	1
0	1	1	0	0	1	1	0	1	0	1	0	0	1	0	1	0	1	1	0	0	1	1	0	1	0	1	0	0	1	0	1	1
0	1	0	1	0	1	1	0	1	0	1	0	0	1	0	1	0	1	1	0	0	1	1	0	1	0	1	0	0	1	0	1	1
0	1	1	0	1	0	0	1	0	1	1	0	0	1	0	1	0	1	1	0	1	0	0	1	0	1	0	1	1	0	0	1	0
0	1	0	1	0	1	1	0	1	0	1	0	0	1	0	1	0	1	1	0	0	1	1	0	1	0	1	0	0	1	0	1	1
1	0	0	1	1	0	0	1	0	1	0	1	1	0	1	0	1	0	1	0	1	0	0	1	0	1	0	1	1	0	1	0	0
0	1	0	1	0	1	1	0	1	0	1	0	0	1	0	1	0	1	1	0	0	1	1	0	1	0	1	0	0	1	0	0	1
0	1	0	1	0	1	1	0	1	0	1	0	0	1	0	1	0	1	0	1	1	0	1	0	0	1	1	0	0	1	0	1	1
1	0	0	1	1	0	0	1	0	1	0	1	1	0	1	0	1	0	1	0	1	0	0	1	0	1	0	1	1	0	0	1	0
0	1	0	1	0	1	1	0	1	0	1	0	0	1	0	1	0	1	1	0	1	0	1	0	1	0	1	0	0	1	0	1	1
1	0	0	1	1	0	0	1	0	1	0	1	1	0	1	0	1	0	1	0	1	0	0	1	0	1	0	1	1	0	1	0	0
0	1	0	0	1	0	0	1	0	1	0	1	1	0	1	0	1	0	0	1	1	0	0	1	0	0	0	1	1	0	0	1	0
0	1	0	1	1	0	0	1	0	1	0	1	1	0	1	0	1	0	1	0	1	0	1	0	0	1	0	1	1	0	0	1	0
1	0	0	1	1	0	0	1	0	1	0	1	1	0	1	0	1	0	0	1	1	0	0	1	0	1	0	1	1	0	1	0	0
0	1	1	0	0	1	1	0	1	0	1	0	0	1	0	1	0	1	0	1	0	1	1	0	0	1	1	0	0	1	0	1	1
0	1	0	1	0	1	1	0	1	0	1	0	0	1	0	1	0	1	1	0	0	0	1	0	1	0	1	0	1	0	0	0	1
0	1	0	1	0	1	1	0	1	0	1	0	0	1	0	1	0	1	1	0	1	0	1	0	1	0	1	0	0	1	0	0	1
0	1	1	0	0	1	1	0	1	0	1	0	0	1	0	1	0	1	1	0	1	0	1	0	1	0	1	0	1	0	0	1	1
0	1	1	0	0	1	1	0	1	0	1	0	0	1	0	1	0	1	1	0	1	0	1	0	1	0	1	0	0	1	0	1	1
0	1	0	1	0	1	1	0	1	0	1	0	0	1	0	1	0	1	1	0	0	1	1	0	1	0	1	0	1	0	0	0	1
0	1	0	1	0	1	1	0	1	0	1	0	0	1	0	1	0	0	1	0	0	1	1	0	1	0	1	0	0	1	0	0	1
0	1	0	1	0	1	1	0	1	0	1	0	0	1	0	1	0	1	1	0	1	0	1	0	1	0	1	0	1	0	0	1	1
0	1	1	0	0	1	1	0	1	0	1	0	0	1	0	1	0	0	1	0	1	0	1	0	1	0	1	0	1	0	0	0	1
0	1	0	1	0	1	1	0	1	0	1	0	0	1	0	1	1	0	1	0	1	0	1	0	1	0	0	1	1	0	0	1	1
1	0	0	0	1	0	0	1	0	1	0	1	1	0	1	0	1	0	1	0	1	0	0	1	0	1	0	1	1	0	1	0	0
0	1	0	1	0	1	1	0	1	0	1	0	0	1	0	1	0	1	1	0	0	1	1	0	1	0	1	0	0	1	0	1	1
1	0	0	1	1	0	0	1	0	1	0	1	1	0	0	0	1	0	1	0	1	0	0	1	0	1	0	1	1	0	0	1	0
0	1	0	1	0	1	1	0	1	0	1	0	0	1	0	1	0	1	1	0	1	0	1	0	1	0	1	0	0	0	0	0	1
0	1	0	1	1	0	0	1	0	1	0	1	1	0	1	0	1	0	0	1	1	0	0	1	0	1	0	1	1	0	1	0	0
0	1	0	1	0	1	1	0	1	0	0	1	0	0	0	1	1	0	1	0	0	1	0	1	1	0	0	1	1	0	0	0	1
1	0	0	1	1	0	0	1	0	1	0	1	1	0	1	0	1	0	0	1	0	1	0	1	0	1	0	1	1	0	1	0	0
1	0	0	1	1	0	0	1	0	1	0	1	1	0	1	0	1	0	0	1	0	1	0	1	0	1	0	1	1	0	0	1	0
1	0	0	1	1	0	0	1	0	1	0	1	1	0	1	0	1	0	0	1	1	0	0	1	0	1	0	1	1	0	0	1	0
1	0	0	1	1	0	0	1	0	1	0	1	1	0	1	0	1	0	0	1	1	0	0	1	0	1	0	1	1	0	0	1	0
1	0	0	1	1	0	0	1	0	1	0	1	1	0	1	0	1	0	0	1	1	0	0	1	0	1	0	1	1	0	0	0	0
0	1	0	1	0	1	1	0	1	0	0	0	0	1	0	1	0	1	0	1	1	0	1	0	1	0	1	0	0	1	0	0	1
1	0	0	1	1	0	0	1	0	1	0	1	1	0	1	0	1	0	1	0	1	0	0	1	0	1	0	1	1	0	1	0	0
0	1	0	1	0	1	1	0	1	0	1	0	0	1	0	1	0	1	1	0	1	0	1	0	1	0	1	0	1	0	0	0	1
0	1	0	1	0	1	1	0	1	0	1	0	0	1	0	1	0	1	1	0	0	1	1	0	1	0	1	0	1	0	0	1	1
0	1	0	1	0	1	1	0	1	0	1	0	0	1	0	1	0	1	1	0	0	1	0	0	1	0	1	0	1	0	0	1	1
0	1	0	1	1	0	0	1	0	1	0	1	0	1	1	0	1	0	1	0	1	0	0	1	0	1	0	1	1	0	0	1	0
1	0	0	1	1	0	0	1	0	1	0	1	0	1	1	0	1	0	1	0	0	1	0	1	0	1	0	1	1	0	0	1	0
1	0	0	1	1	0	0	1	0	1	0	1	1	0	1	0	1	0	0	1	1	0	0	1	0	1	0	1	1	0	1	0	0
0	1	0	0	0	1	1	0	1	0	1	0	0	1	0	1	0	1	1	0	1	0	1	0	0	1	1	0	0	1	0	1	1
0	1	0	1	0	1	1	0	1	0	1	0	0	1	0	1	0	1	1	0	1	0	1	0	1	0	1	0	0	1	0	1	1
0	1	1	0	0	1	1	0	1	0	1	0	0	1	0	1	0	1	1	0	1	0	1	0	0	1	1	0	0	1	0	0	1
0	1	0	1	0	1	0	1	1	0	1	0	0	1	0	1	0	1	0	1	0	1	1	0	1	0	0	1	1	0	0	1	0
0	1	0	1	0	1	1	0	1	0	1	0	0	1	0	1	0	1	1	0	0	1	1	0	1	0	1	0	0	1	0	0	1
0	1	1	0	0	1	0	1	0	1	1	0	0	1	1	0	0	1	0	1	1	0	1	0	0	1	0	1	1	0	0	1	0
0	1	1	0	0	1	1	0	1	0	0	1	0	1	0	1	0	1	0	1	0	1	1	0	1	0	0	1	0	1	0	1	1
1	0	0	1	0	1	0	1	0	1	0	1	1	0	1	0	1	0	0	1	0	1	1	0	0	1	0	1	1	0	1	0	1
1	0	0	1	0	1	1	0	0	1	0	1	1	0	1	0	1	0	0	1	0	1	0	1	0	1	0	1	1	0	0	0	1
1	0	0	1	0	1	0	1	0	1	0	1	1	0	0	1	0	1	0	1	0	1	0	1	0	1	0	1	1	0	0	1	1
0	1	0	1	0	1	1	0	0	1	0	1	1	0	1	0	1	0	0	1	0	1	1	0	0	1	0	1	1	0	0	1	1
1	0	1	0	1	0	0	1	0	1	1	0	1	0	1	0	1	0	0	1	1	0	0	1	0	1	0	1	1	0	1	0	0
0	1	1	0	0	1	1	0	1	0	0	1	0	1	0	1	0	1	0	1	1	0	0	1	1	0	0	1	1	0	0	0	1
0	1	1	0	0	1	1	0	1	0	1	0	0	1	0	1	0	0	0	1	0	1	0	1	1	0	0	1	1	0	0	1	1
1	0	1	0	1	0	0	1	0	1	0	1	1	0	1	0	1	0	0	1	1	0	0	1	0	1	0	1	1	0	0	1	0
1	0	1	0	1	0	0	1	0	1	0	1	1	0	1	0	1	0	1	0	1	0	0	1	0	1	0	1	1	0	1	0	0
1	0	0	0	1	0	0	1	0	1	0	1	1	0	1	0	1	0	0	1	1	0	0	1	0	1	0	1	1	0	1	0	0
1	0	1	0	0	1	1	0	0	1	0	1	1	0	1	0	1	0	0	1	0	1	0	1	0	1	0	1	1	0	0	1	1
1	0	1	0	1	0	0	1	0	1	0	1	1	0	1	0	1	0	0	1	1	0	0	1	0	1	0	1	1	0	1	0	0
1	0	1	0	1	0	0	1	0	1	0	1	1	0	1	0	1	0	1	0	1	0	0	1	0	1	0	1	1	0	1	0	0
1	0	0	1	0	1	1	0	0	1	0	1	0	1	1	0	0	1	0	1	0	1	1	0	0	1	0	1	1	0	0	1	1
1	0	1	0	1	0	0	1	0	1	0	1	1	0	1	0	1	0	0	1	1	0	0	0	0	1	0	1	1	0	0	0	0
0	1	1	0	0	1	1	0	1	0	1	0	0	1	0	1	0	1	0	1	1	0	1	0	1	0	1	0	0	1	0	1	1
0	1	1	0	0	1	1	0	1	0	1	0	0	1	0	1	0	1	0	1	0	1	1	0	1	0	1	0	0	1	0	1	1
0	1	0	1	0	1	1	0	1	0	1	0	0	1	0	1	1	0	0	1	0	1	1	0	1	0	0	0	0	1	0	1	1
0	1	1	0	0	1	1	0	1	0	1	0	0	1	1	0	0	1	0	1	0	1	1	0	1	0	1	0	0	1	0	1	1
0	1	1	0	0	1	1	0	0	1	0	1	1	0	1	0	1	0	1	0	1	0	1	0	1	0	1	0	1	0	0	1	1
0	1	1	0	0	1	1	0	0	1	0	1	1	0	0	0	0	0	1	0	0	1	0	0	0	0	0	0	0	1	0	1	1
1	0	1	0	0	0	1	0	0	1	0	1	1	0	1	0	1	0	1	0	0	1	0	1	0	1	0	1	1	0	0	1	1
0	1	1	0	1	0	1	0	0	1	0	1	0	1	1	0	1	0	0	1	0	1	1	0	1	0	0	1	1	0	0	1	1
0	1	0	1	0	1	1	0	1	0	0	1	0	1	0	1	0	1	0	1	1	0	1	0	1	0	1	0	1	0	0	1	1
1	0	1	0	1	0	0	1	0	1	0	1	1	0	1	0	1	0	0	1	0	0	0	1	0	1	0	1	1	0	1	0	0
0	1	1	0	1	0	1	0	0	1	0	1	1	0	1	0	1	0	1	0	0	1	0	1	1	0	0	1	1	0	0	1	1
0	1	1	0	0	1	1	0	0	1	0	1	0	1	1	0	1	0	1	0	0	1	1	0	1	0	0	1	1	0	0	1	1
0	1	1	0	0	1	1	0	0	1	0	1	0	1	1	0	0	0	1	0	0	1	1	0	0	1	0	1	0	1	0	0	1
0	1	1	0	1	0	1	0	0	1	0	1	0	0	1	0	0	0	1	0	1	0	1	0	1	0	0	1	0	0	1	0	1
0	0	0	0	0	0	0	0	1	0	0	1	0	1	0	1	0	1	0	1	0	0	1	0	0	1	0	1	1	0	0	0	1
0	1	0	1	0	1	1	0	1	0	1	0	1	0	0	1	0	1	1	0	0	1	1	0	1	0	1	0	0	1	0	1	1
1	0	0	1	1	0	0	1	0	1	0	1	1	0	1	0	1	0	1	0	1	0	0	1	0	1	0	1	1	0	0	1	0
1	0	0	0	0	0	0	0	0	0	0	0	0	0	0	0	0	0	0	0	0	0	0	0	0	0	0	1	0	0	0	0	0
0	1	0	0	0	1	1	0	1	0	1	0	0	1	0	1	0	1	1	0	1	0	1	0	1	0	1	0	0	1	0	0	1
0	1	0	0	0	1	1	0	1	0	1	0	0	1	0	1	0	1	1	0	1	0	1	0	1	0	1	0	0	1	0	0	1
1	0	1	0	0	1	1	0	1	0	1	0	0	1	0	1	0	1	0	1	1	0	1	0	1	0	1	0	0	1	0	1	1
1	0	0	0	1	0	0	1	0	1	0	1	1	0	1	0	1	0	0	1	1	0	0	1	0	1	0	1	1	0	0	1	0
1	0	0	0	0	1	1	0	1	0	0	1	0	1	0	1	1	0	0	1	1	0	1	0	1	0	1	0	0	1	0	0	1
1	0	0	0	1	0	0	1	0	1	0	1	1	0	1	0	1	0	0	1	1	0	0	1	0	1	0	1	1	0	1	0	0
0	1	0	0	0	1	1	0	1	0	1	0	0	1	0	1	0	1	1	0	1	0	1	0	1	0	1	0	0	1	0	0	1
1	0	0	0	0	1	1	0	0	0	0	0	0	1	0	1	0	1	0	1	0	0	0	0	1	0	1	0	0	1	0	1	1
0	1	1	0	0	1	1	0	1	0	1	0	0	1	0	1	0	1	1	0	0	1	1	0	1	0	1	0	0	1	0	1	1
0	1	0	1	0	1	0	1	0	1	1	0	0	1	1	0	1	0	1	0	1	0	0	1	0	1	0	1	1	0	0	1	0
1	0	0	1	0	1	1	0	1	0	1	0	1	0	0	1	0	1	0	1	0	1	1	0	1	0	1	0	0	1	0	1	1
1	0	1	0	1	0	0	1	0	1	0	1	1	0	1	0	1	0	1	0	1	0	0	1	0	1	0	1	1	0	1	0	0
1	0	0	0	0	0	0	1	0	1	0	1	1	0	1	0	1	0	0	1	1	0	0	1	0	1	0	1	0	0	0	1	0
1	0	0	0	1	0	0	1	0	1	0	1	1	0	1	0	1	0	0	1	1	0	0	1	0	1	0	1	1	0	0	1	0
1	0	1	0	1	0	0	1	0	1	0	1	1	0	1	0	1	0	0	1	1	0	0	1	1	0	0	1	1	0	0	1	0
0	1	0	0	1	0	0	1	0	1	0	1	1	0	0	1	1	0	1	0	1	0	0	1	0	1	0	1	1	0	0	1	0
1	0	0	0	0	1	1	0	1	0	1	0	0	1	0	1	0	1	1	0	1	0	1	0	1	0	1	0	0	1	0	1	1
1	0	0	0	1	0	0	1	0	1	0	1	1	0	1	0	1	0	0	1	1	0	0	1	0	1	0	1	1	0	0	1	0
1	0	0	0	1	0	0	1	0	1	0	1	1	0	1	0	1	0	1	0	1	0	0	1	0	1	0	1	1	0	1	0	0
1	0	0	0	0	1	1	0	1	0	1	0	0	1	0	1	0	1	0	1	0	1	1	0	1	0	0	1	0	1	0	1	1
1	0	0	0	0	1	1	0	1	0	0	1	1	0	0	1	1	0	0	1	0	1	1	0	1	0	1	0	0	1	0	1	1
0	0	0	0	0	1	1	0	1	0	1	0	0	1	0	1	0	0	1	0	0	0	0	0	0	0	0	0	0	0	0	0	1
0	1	0	0	0	1	1	0	0	0	0	0	0	1	0	1	0	1	1	0	1	0	1	0	1	0	1	0	0	1	0	0	1
1	0	1	0	0	1	1	0	1	0	0	1	1	0	0	1	0	1	0	1	1	0	1	0	1	0	0	1	1	0	0	1	1
1	0	1	0	1	0	0	1	0	1	0	1	1	0	1	0	1	0	0	1	1	0	0	1	0	1	0	1	1	0	0	0	0
1	0	1	0	1	0	0	1	0	1	0	1	1	0	1	0	1	0	0	1	1	0	0	1	0	1	0	1	1	0	0	1	0
1	0	1	0	1	0	0	1	0	1	0	1	1	0	1	0	1	0	1	0	1	0	0	1	0	1	0	1	1	0	0	0	0
1	0	1	0	1	0	0	1	0	1	0	1	1	0	1	0	1	0	0	1	1	0	0	1	0	1	0	1	1	0	1	0	0
1	0	0	1	1	0	0	1	0	1	0	1	1	0	1	0	1	0	0	1	0	1	0	1	0	1	1	0	1	0	0	1	0
1	0	0	0	0	1	1	0	1	0	0	1	0	1	0	1	0	1	0	1	1	0	1	0	1	0	0	1	0	1	0	1	1
1	0	1	0	0	1	1	0	1	0	0	1	0	1	0	1	0	1	0	1	1	0	1	0	1	0	0	1	1	0	0	1	1
0	1	1	0	0	1	1	0	1	0	0	1	0	1	0	1	0	1	1	0	1	0	1	0	1	0	1	0	0	1	0	1	1
1	0	1	0	1	0	0	1	1	0	1	0	0	1	0	1	0	1	0	1	1	0	1	0	0	1	0	1	1	0	0	1	0
1	0	1	0	1	0	0	1	0	1	0	1	0	1	0	1	0	1	0	1	1	0	0	1	0	1	0	1	0	0	0	1	0
1	0	1	0	1	0	0	1	0	1	0	1	0	1	0	1	0	1	0	1	1	0	0	1	0	1	0	1	1	0	0	1	0
0	0	0	1	1	0	1	0	1	0	1	0	0	1	0	1	0	1	0	1	0	1	1	0	1	0	0	1	0	1	0	1	1
1	0	0	0	1	0	1	0	1	0	0	1	0	1	0	1	0	1	0	1	1	0	1	0	1	0	0	1	1	0	0	0	1
1	0	1	0	0	1	1	0	1	0	0	1	0	1	0	1	0	1	0	1	1	0	1	0	1	0	0	1	0	0	0	1	1
1	0	0	1	1	0	0	1	0	1	0	1	1	0	1	0	1	0	1	0	1	0	0	1	0	1	0	1	1	0	0	1	0
1	0	1	0	1	0	1	0	1	0	1	0	0	1	0	1	0	1	0	1	1	0	0	1	0	1	0	1	0	1	0	1	1
1	0	0	1	1	0	0	1	0	1	0	1	1	0	1	0	1	0	0	1	0	1	0	1	0	1	0	1	1	0	0	1	0
1	0	1	0	0	1	1	0	1	0	1	0	0	1	0	1	0	1	0	1	1	0	1	0	0	1	1	0	0	1	0	1	1
0	1	0	1	1	0	0	1	0	1	0	1	1	0	1	0	1	0	0	1	1	0	0	1	0	1	0	1	1	0	0	1	0
0	1	0	1	0	0	0	1	0	1	0	1	1	0	1	0	0	1	1	0	0	1	0	0	0	1	0	1	1	0	1	0	1
1	0	0	1	0	1	1	0	1	0	0	1	1	0	0	1	0	1	0	1	0	1	1	0	0	1	1	0	0	1	0	1	1
1	0	1	0	0	1	1	0	1	0	0	1	0	1	0	1	0	1	0	1	0	1	1	0	0	1	0	1	1	0	0	1	1
1	0	0	1	1	0	0	1	0	1	0	1	1	0	1	0	1	0	1	0	1	0	0	1	0	1	0	1	1	0	1	0	0
0	1	0	1	1	0	0	1	0	1	0	1	1	0	0	0	1	0	1	0	0	1	0	1	0	1	0	1	1	0	1	0	0
0	1	0	1	1	0	0	1	0	1	0	1	0	1	1	0	1	0	1	0	1	0	0	1	0	1	0	1	1	0	1	0	0
1	0	0	1	0	1	1	0	1	0	0	1	1	0	0	1	0	1	1	0	0	1	1	0	0	0	0	0	0	0	0	0	1
1	0	0	1	1	0	0	1	0	1	0	1	1	0	1	0	1	0	0	1	1	0	0	1	0	1	0	1	1	0	1	0	0
1	0	0	1	0	1	1	0	0	0	0	1	0	1	0	1	0	1	0	1	0	1	1	0	1	0	0	0	1	0	0	0	1
1	0	0	1	1	0	1	0	0	1	0	1	1	0	1	0	1	0	1	0	1	0	0	1	0	1	0	1	0	1	0	1	1
1	0	1	0	1	0	1	0	0	1	0	1	0	1	1	0	1	0	1	0	1	0	0	1	0	1	0	1	1	0	0	1	1
1	0	0	1	0	1	1	0	0	1	0	1	0	1	1	0	1	0	1	0	0	1	0	1	0	1	0	1	1	0	0	1	1
1	0	0	1	1	0	0	1	0	1	0	1	0	1	1	0	1	0	1	0	1	0	0	1	0	1	0	1	1	0	0	1	0
0	1	0	1	1	0	1	0	0	1	0	1	1	0	1	0	1	0	0	1	0	1	0	1	0	1	0	1	1	0	0	0	1
1	0	0	1	0	1	1	0	1	0	0	1	0	1	0	1	0	1	0	1	0	1	1	0	0	1	1	0	0	1	0	0	1
0	1	1	0	0	1	0	1	0	1	0	1	0	1	0	1	1	0	0	1	1	0	0	1	1	0	0	1	0	1	0	1	0
0	1	1	0	0	1	0	1	0	1	0	1	0	1	0	1	1	0	0	1	0	1	0	1	1	0	0	1	0	1	0	1	0
1	0	1	0	0	1	0	1	0	1	0	1	1	0	1	0	0	1	1	0	1	0	1	0	0	1	0	1	0	1	0	0	1
0	1	1	0	0	1	1	0	1	0	1	0	0	1	0	1	0	1	0	1	0	1	1	0	1	0	0	1	1	0	0	1	1
0	1	1	0	0	1	1	0	1	0	1	0	0	0	0	1	0	1	0	0	1	0	1	0	1	0	1	0	0	1	0	0	1
1	0	0	0	1	0	0	1	0	1	0	1	1	0	1	0	1	0	0	1	1	0	0	1	0	1	0	1	1	0	0	1	0
1	0	0	1	0	1	1	0	1	0	1	0	0	1	0	1	0	1	0	1	1	0	1	0	0	0	1	0	0	1	0	1	1
1	0	1	0	1	0	1	0	0	1	0	1	1	0	1	0	1	0	0	1	0	1	0	1	0	1	0	1	1	0	0	1	1
0	1	0	0	0	1	1	0	1	0	1	0	0	1	0	1	0	1	1	0	1	0	1	0	1	0	1	0	0	1	0	0	1
1	0	0	1	0	1	1	0	1	0	1	0	0	1	0	1	0	1	0	1	1	0	1	0	1	0	1	0	0	1	0	1	1
1	0	1	0	0	1	0	1	1	0	1	0	0	1	0	1	0	1	0	1	1	0	1	0	1	0	0	1	0	1	0	1	0
1	0	1	0	0	1	1	0	1	0	1	0	0	1	0	1	0	1	0	1	0	1	0	0	1	0	1	0	0	1	0	1	1
0	0	1	0	0	1	1	0	1	0	1	0	0	1	0	1	0	1	0	1	0	1	0	0	1	0	1	0	0	1	0	0	1
0	1	1	0	0	1	1	0	1	0	1	0	0	1	0	1	0	1	0	1	1	0	1	0	1	0	1	0	0	1	0	1	1
0	0	0	0	0	1	1	0	1	0	1	0	0	1	0	1	0	1	0	0	0	0	1	0	1	0	1	0	0	0	0	0	1
1	0	1	0	0	1	1	0	1	0	1	0	0	1	0	1	0	1	0	1	0	1	1	0	1	0	1	0	0	1	0	1	1
0	1	0	0	0	1	1	0	1	0	1	0	0	1	0	1	0	1	1	0	1	0	1	0	1	0	1	0	0	1	0	1	1
0	0	0	0	0	0	0	0	0	0	0	0	0	0	0	0	0	1	0	0	0	0	0	0	0	0	0	0	0	0	0	0	1
1	0	1	0	0	1	1	0	1	0	1	0	0	1	0	1	0	1	0	1	0	1	1	0	1	0	1	0	0	1	0	1	1
0	1	1	0	0	1	1	0	1	0	1	0	0	1	0	1	0	1	0	1	1	0	0	0	1	0	1	0	0	1	0	1	1
1	0	0	1	0	1	1	0	1	0	1	0	0	1	0	1	0	1	0	1	0	1	1	0	1	0	1	0	0	1	0	1	1
0	1	1	0	0	1	1	0	1	0	1	0	0	1	0	1	0	1	1	0	1	0	1	0	1	0	1	0	0	1	0	0	1
0	1	0	0	1	0	0	1	0	1	0	1	0	1	0	1	1	0	1	0	1	0	0	1	0	0	0	1	0	0	0	0	0
0	1	1	0	0	1	1	0	1	0	1	0	0	1	0	1	0	1	1	0	1	0	1	0	1	0	1	0	0	1	0	1	1
1	0	0	0	1	0	0	1	0	1	0	1	1	0	1	0	1	0	1	0	1	0	0	1	0	1	0	1	1	0	0	0	0
1	0	0	1	1	0	0	1	0	1	0	1	1	0	0	0	1	0	0	1	1	0	0	1	0	1	0	1	1	0	0	0	0
1	0	1	0	1	0	1	0	1	0	0	1	0	1	0	1	0	1	1	0	0	1	1	0	1	0	0	1	0	1	0	1	1
1	0	1	0	0	1	1	0	1	0	1	0	0	1	0	1	0	1	1	0	1	0	1	0	1	0	1	0	0	1	0	1	1
1	0	1	0	0	1	1	0	1	0	0	1	0	1	0	0	0	1	0	1	0	1	1	0	1	0	1	0	0	1	0	1	1
1	0	1	0	1	0	0	1	0	1	0	1	1	0	1	0	1	0	1	0	1	0	0	1	0	1	0	1	1	0	0	0	0
1	0	1	0	0	1	1	0	1	0	0	1	0	1	0	1	0	1	1	0	0	1	0	1	1	0	0	1	0	1	0	0	1
1	0	0	0	0	1	0	1	0	1	0	1	1	0	1	0	1	0	0	1	1	0	1	0	1	0	0	1	1	0	0	1	0
1	0	1	0	0	1	1	0	1	0	1	0	0	1	0	1	0	1	0	1	0	1	1	0	0	0	1	0	0	1	0	0	1
0	1	0	1	1	0	1	0	1	0	1	0	0	1	0	1	0	0	1	0	0	1	1	0	1	0	1	0	0	1	0	0	1
1	0	1	0	0	1	1	0	1	0	1	0	0	1	0	1	0	1	1	0	1	0	1	0	1	0	0	1	0	1	0	1	1
0	1	0	1	0	1	1	0	1	0	1	0	0	1	0	1	0	1	1	0	1	0	1	0	1	0	1	0	0	1	0	1	1
0	1	1	0	0	1	1	0	1	0	0	1	0	1	0	1	0	1	0	1	0	1	1	0	1	0	1	0	0	1	0	1	1
0	1	1	0	0	1	1	0	1	0	1	0	0	1	0	1	0	1	0	1	1	0	1	0	1	0	1	0	0	1	0	1	1
1	0	1	0	0	1	0	1	0	1	0	1	0	1	1	0	1	0	1	0	1	0	0	1	0	1	0	1	1	0	0	1	0
1	0	1	0	0	1	1	0	1	0	0	1	0	1	0	1	0	1	0	1	1	0	0	1	1	0	1	0	1	0	0	1	1
1	0	1	0	1	0	0	1	0	1	0	1	1	0	1	0	1	0	0	1	1	0	0	1	1	0	0	1	1	0	0	1	0
0	1	0	0	1	0	0	1	0	1	0	1	0	1	1	0	1	0	0	1	1	0	0	1	0	1	0	1	1	0	0	1	0
1	0	1	0	0	1	1	0	1	0	1	0	0	1	0	1	0	1	1	0	1	0	0	0	1	0	1	0	0	1	0	1	1
0	1	0	1	0	1	1	0	1	0	1	0	0	1	0	1	0	1	0	1	0	1	1	0	1	0	1	0	1	0	0	1	1
1	0	1	0	0	1	1	0	1	0	0	1	0	1	0	1	0	1	1	0	1	0	1	0	1	0	1	0	0	1	0	1	1
1	0	0	1	1	0	0	1	0	1	0	1	1	0	1	0	1	0	0	1	1	0	0	1	0	1	0	1	1	0	0	1	0
1	0	1	0	0	1	1	0	1	0	1	0	0	1	0	1	0	1	1	0	0	1	1	0	1	0	1	0	0	1	0	1	1
1	0	0	1	0	1	1	0	1	0	0	1	1	0	0	1	0	1	1	0	0	1	1	0	0	1	1	0	0	1	0	1	1
0	1	0	1	1	0	0	1	0	1	0	1	1	0	1	0	1	0	0	1	1	0	0	1	0	1	0	1	1	0	0	1	0
1	0	0	1	0	1	0	1	0	1	0	1	1	0	1	0	1	0	0	1	0	1	0	1	0	1	0	1	0	1	0	0	1
0	1	0	1	0	1	1	0	0	1	0	1	1	0	1	0	0	0	0	1	1	0	1	0	1	0	0	1	0	1	0	0	1
1	0	0	1	1	0	0	1	0	1	0	1	1	0	1	0	1	0	0	1	1	0	0	1	0	1	0	1	1	0	1	0	0
0	1	0	0	0	1	1	0	1	0	1	0	0	1	0	1	0	1	1	0	0	0	1	0	1	0	1	0	0	1	0	0	1
1	0	0	1	0	1	1	0	1	0	1	0	1	0	0	1	0	1	1	0	0	1	1	0	1	0	0	1	0	1	0	1	1
1	0	1	0	0	1	1	0	1	0	1	0	0	1	0	1	0	1	1	0	1	0	1	0	1	0	1	0	0	1	0	0	1
1	0	0	1	0	1	1	0	0	1	0	1	1	0	1	0	1	0	1	0	0	1	1	0	1	0	1	0	0	1	0	0	1
0	1	1	0	0	1	1	0	1	0	1	0	0	1	0	1	0	1	1	0	0	1	1	0	1	0	1	0	0	1	0	0	1
1	0	1	0	1	0	0	1	0	1	1	0	1	0	1	0	1	0	1	0	1	0	0	1	0	1	0	1	1	0	0	1	0
1	0	0	1	1	0	0	1	0	1	0	1	1	0	1	0	1	0	0	1	1	0	0	0	0	1	0	1	1	0	1	0	0
1	0	0	0	1	0	0	1	0	1	0	1	1	0	1	0	1	0	1	0	1	0	0	1	0	1	0	1	1	0	0	1	0
1	0	1	0	0	1	1	0	1	0	0	1	0	1	0	1	0	1	1	0	0	1	1	0	1	0	0	1	0	1	0	1	1
0	1	1	0	0	1	1	0	1	0	1	0	0	1	0	1	0	1	1	0	1	0	1	0	1	0	1	0	0	0	0	1	1
1	0	0	1	1	0	0	1	0	1	0	1	1	0	1	0	1	0	1	0	1	0	0	1	0	1	0	0	1	0	0	1	0
1	0	0	1	0	1	0	1	0	1	0	1	0	1	1	0	0	1	0	1	1	0	0	1	0	1	0	1	1	0	0	1	0
1	0	0	1	1	0	0	1	0	1	0	1	1	0	1	0	1	0	1	0	1	0	0	1	0	1	0	1	1	0	0	1	0
1	0	0	1	1	0	0	1	0	1	0	1	1	0	1	0	0	1	0	1	1	0	0	1	0	1	0	1	1	0	0	1	0
1	0	0	1	0	1	1	0	1	0	1	0	0	1	0	1	1	0	1	0	0	1	1	0	1	0	1	0	0	1	0	0	1
1	0	0	1	1	0	0	1	0	1	0	1	1	0	1	0	1	0	0	1	1	0	0	1	0	1	0	1	1	0	0	1	0
1	0	1	0	0	1	1	0	1	0	0	1	0	1	0	1	0	1	0	1	1	0	0	1	1	0	0	1	0	1	0	0	1
1	0	1	0	1	0	0	1	0	1	0	1	1	0	1	0	1	0	0	1	1	0	0	1	1	0	0	1	1	0	0	1	0
1	0	1	0	0	1	1	0	1	0	1	0	0	1	0	1	0	1	1	0	1	0	1	0	1	0	1	0	0	1	0	1	1
0	1	1	0	0	1	1	0	1	0	0	1	0	1	0	1	1	0	1	0	1	0	0	1	0	1	1	0	1	0	0	1	1
0	1	0	1	0	1	1	0	1	0	1	0	0	1	0	1	0	0	0	1	1	0	1	0	1	0	1	0	0	1	0	0	1
1	0	1	0	1	0	0	1	0	1	0	1	0	1	1	0	1	0	0	1	1	0	1	0	1	0	0	1	0	1	0	1	0
1	0	1	0	1	0	0	1	1	0	0	1	0	1	0	0	0	1	1	0	1	0	0	1	0	1	0	1	1	0	0	1	0
0	1	1	0	0	1	1	0	1	0	1	0	0	1	0	1	0	1	0	1	0	1	1	0	1	0	0	1	0	1	0	1	1
1	0	1	0	1	0	1	0	0	1	0	1	0	1	1	0	1	0	1	0	1	0	0	0	1	0	0	1	0	1	0	1	0
1	0	0	1	0	1	1	0	1	0	1	0	0	1	0	1	0	0	0	1	1	0	1	0	0	1	1	0	0	1	0	1	1
0	1	1	0	0	1	1	0	1	0	1	0	1	0	0	1	0	1	0	1	1	0	1	0	1	0	1	0	0	1	0	1	1
0	1	1	0	0	1	1	0	1	0	1	0	0	1	0	1	0	1	0	1	0	1	1	0	1	0	1	0	0	1	0	1	1
1	0	1	0	0	1	1	0	0	1	1	0	0	1	0	1	0	1	1	0	1	0	1	0	1	0	0	1	0	0	0	1	1
1	0	0	1	1	0	0	1	0	1	0	1	0	0	1	0	1	0	1	0	1	0	0	0	0	1	0	1	1	0	1	0	0
0	0	0	0	0	0	0	0	0	0	0	0	0	0	0	0	0	0	0	0	0	0	0	0	0	0	0	0	0	0	0	0	0
0	1	1	0	0	1	1	0	1	0	1	0	0	1	0	1	0	0	1	0	0	1	1	0	1	0	1	0	0	1	0	1	1
1	0	0	1	1	0	0	1	0	1	0	1	1	0	1	0	1	0	1	0	1	0	0	1	0	1	0	1	1	0	1	0	0
1	0	0	1	1	0	0	1	0	1	0	1	1	0	1	0	1	0	1	0	1	0	0	1	0	1	0	1	1	0	1	0	0
0	1	0	1	0	1	1	0	1	0	0	1	0	1	0	1	0	1	1	0	1	0	1	0	1	0	1	0	0	1	0	1	1
1	0	0	1	1	0	0	1	0	1	0	1	1	0	1	0	1	0	1	0	1	0	0	1	0	1	0	1	1	0	0	1	0
0	1	1	0	0	1	1	0	1	0	1	0	0	1	0	1	0	1	0	1	1	0	1	0	1	0	1	0	1	0	0	1	1
0	1	1	0	0	1	1	0	1	0	1	0	0	1	0	1	0	1	0	1	1	0	1	0	1	0	0	1	0	1	0	1	1
1	0	1	0	1	0	0	1	0	1	1	0	1	0	1	0	1	0	1	0	1	0	0	1	1	0	0	1	1	0	1	0	0
1	0	1	0	1	0	0	1	0	1	1	0	1	0	1	0	1	0	1	0	1	0	0	1	1	0	0	1	0	0	0	1	0
1	0	1	0	0	1	1	0	1	0	1	0	0	1	0	1	0	1	1	0	0	1	1	0	1	0	1	0	0	1	0	1	1
0	1	1	0	0	1	1	0	1	0	1	0	0	1	0	1	0	1	1	0	1	0	1	0	1	0	1	0	1	0	0	1	1
0	1	1	0	0	1	1	0	1	0	1	0	0	1	0	1	0	1	0	1	1	0	1	0	1	0	1	0	1	0	0	1	1
0	1	1	0	0	1	1	0	1	0	0	0	0	1	0	1	0	1	1	0	0	0	0	0	1	0	0	0	0	0	0	0	1
0	1	1	0	0	1	1	0	1	0	1	0	0	1	0	1	0	1	0	1	1	0	1	0	0	0	1	0	0	1	0	1	1
0	1	1	0	0	1	1	0	1	0	1	0	0	1	0	1	0	1	1	0	1	0	1	0	1	0	1	0	0	1	0	0	1
0	1	1	0	0	1	1	0	1	0	1	0	0	1	0	1	0	1	1	0	1	0	1	0	1	0	1	0	0	1	0	0	1
0	1	1	0	0	1	1	0	1	0	1	0	0	1	0	1	0	1	0	1	1	0	1	0	1	0	1	0	1	0	0	1	1
1	0	1	0	1	0	0	1	0	1	0	1	1	0	1	0	1	0	0	1	1	0	0	1	1	0	0	1	1	0	0	1	0
0	1	1	0	1	0	1	0	1	0	1	0	0	1	0	1	0	1	0	1	1	0	1	0	1	0	0	1	1	0	0	1	0
0	1	1	0	0	1	1	0	1	0	1	0	0	1	0	1	0	1	1	0	1	0	1	0	1	0	1	0	0	1	0	0	1
0	1	1	0	0	1	1	0	1	0	1	0	0	1	0	1	0	1	1	0	1	0	1	0	1	0	1	0	1	0	0	1	1
0	1	0	1	0	1	1	0	1	0	1	0	0	1	0	1	0	1	1	0	1	0	1	0	1	0	1	0	0	1	0	1	1
1	0	0	1	0	1	1	0	1	0	0	1	0	1	0	1	0	1	1	0	0	0	1	0	1	0	1	0	1	0	0	1	1
0	1	1	0	0	1	1	0	1	0	1	0	0	1	0	1	0	1	0	1	1	0	1	0	1	0	1	0	0	1	0	0	1
1	0	1	0	1	0	0	1	0	1	1	0	0	1	0	1	1	0	0	1	1	0	0	1	0	1	0	1	0	0	0	1	0
0	1	1	0	1	0	0	1	0	1	1	0	0	1	1	0	1	0	0	1	1	0	1	0	1	0	0	1	0	1	0	1	0
1	0	1	0	0	1	1	0	0	1	0	1	1	0	1	0	1	0	1	0	0	0	1	0	0	1	0	1	1	0	1	0	1
1	0	1	0	1	0	0	1	0	1	0	1	1	0	1	0	1	0	1	0	1	0	0	1	0	1	0	1	0	1	1	0	0
1	0	1	0	0	1	0	1	0	1	0	1	0	1	0	1	1	0	0	1	1	0	1	0	1	0	0	1	1	0	0	1	0
1	0	1	0	1	0	0	1	0	1	0	1	1	0	1	0	1	0	1	0	1	0	0	1	0	1	0	1	1	0	0	1	0
1	0	1	0	1	0	0	1	0	1	0	1	1	0	1	0	1	0	0	1	1	0	0	1	0	1	0	1	1	0	1	0	0
1	0	1	0	0	1	1	0	1	0	1	0	0	1	0	1	0	1	0	1	1	0	1	0	1	0	0	1	1	0	0	1	1
0	1	1	0	0	1	0	1	0	1	0	1	0	1	0	1	1	0	1	0	1	0	1	0	1	0	0	1	1	0	0	0	0
0	1	1	0	1	0	0	1	0	1	0	1	1	0	1	0	1	0	0	1	1	0	0	0	0	1	0	1	1	0	1	0	0
1	0	1	0	1	0	0	1	0	1	0	1	1	0	1	0	1	0	1	0	1	0	0	1	0	1	0	1	1	0	0	1	0
1	0	1	0	0	1	1	0	1	0	0	1	0	1	0	1	0	1	0	1	0	1	1	0	1	0	1	0	0	0	0	1	1
1	0	1	0	0	1	1	0	1	0	0	1	0	1	0	1	0	1	0	1	0	1	1	0	1	0	1	0	0	1	0	1	1
1	0	1	0	0	1	1	0	1	0	0	1	0	0	0	1	0	0	0	1	0	1	0	1	1	0	0	1	0	1	0	0	1
0	1	0	1	0	1	0	0	1	0	0	1	0	1	0	1	0	1	1	0	0	1	1	0	0	1	1	0	0	0	0	1	1
0	1	0	1	0	1	1	0	0	1	0	1	1	0	0	1	1	0	0	1	0	1	1	0	0	1	0	1	0	1	0	1	1
0	1	0	1	0	1	1	0	0	1	0	1	1	0	0	1	1	0	0	1	0	1	1	0	0	1	0	1	1	0	0	0	1
0	1	1	0	0	1	1	0	0	0	0	1	0	0	0	1	0	1	0	1	1	0	1	0	0	1	0	1	1	0	0	1	1
0	1	1	0	0	1	1	0	1	0	0	1	0	1	0	1	0	1	0	1	1	0	0	0	1	0	0	1	1	0	0	1	1
0	1	1	0	0	1	1	0	1	0	0	1	0	1	0	1	1	0	0	1	0	1	1	0	0	1	0	1	0	1	0	1	1
0	1	0	1	0	1	1	0	1	0	0	1	0	1	0	1	0	1	0	1	0	1	1	0	0	1	0	1	0	1	0	1	1
1	0	0	1	0	1	1	0	1	0	0	1	0	1	0	1	1	0	0	1	0	1	1	0	0	1	0	1	1	0	0	0	1
1	0	0	1	1	0	0	1	0	1	0	1	0	0	0	0	1	0	0	1	1	0	0	1	0	0	0	0	0	0	0	0	0
1	0	1	0	0	1	0	1	0	1	0	1	1	0	1	0	1	0	0	1	1	0	0	1	0	1	0	1	0	1	0	1	0
0	1	0	1	0	1	1	0	1	0	0	1	0	1	0	1	0	1	0	1	1	0	1	0	0	0	1	0	0	1	0	0	1
1	0	0	1	1	0	1	0	1	0	1	0	0	1	0	1	0	1	0	1	0	1	1	0	1	0	1	0	0	1	0	1	1
1	0	0	1	0	1	1	0	1	0	0	1	0	1	0	1	0	1	0	1	1	0	1	0	0	1	0	1	0	1	0	1	1
1	0	1	0	1	0	0	1	0	1	1	0	0	1	0	1	0	1	0	1	1	0	0	1	0	1	0	1	1	0	0	1	0
1	0	1	0	0	0	1	0	1	0	0	1	0	1	0	1	0	1	1	0	1	0	1	0	1	0	1	0	0	1	0	1	1
1	0	1	0	1	0	0	1	0	1	0	1	0	1	1	0	1	0	0	1	1	0	0	1	0	1	0	1	1	0	0	1	0
1	0	1	0	1	0	0	1	0	1	0	1	1	0	1	0	1	0	1	0	1	0	0	1	0	1	0	1	1	0	1	0	0
1	0	0	1	1	0	0	1	0	1	0	1	1	0	1	0	1	0	0	1	1	0	0	1	0	1	0	1	1	0	0	0	0
1	0	1	0	1	0	0	1	0	1	0	1	1	0	1	0	1	0	0	1	1	0	0	1	0	1	0	1	1	0	1	0	0
1	0	1	0	1	0	0	1	0	1	0	1	1	0	1	0	1	0	1	0	1	0	0	1	0	1	0	1	1	0	1	0	0
0	1	1	0	0	1	1	0	1	0	0	1	0	1	0	1	0	1	1	0	1	0	1	0	1	0	0	1	1	0	0	0	1
1	0	1	0	1	0	0	1	0	1	0	1	1	0	1	0	1	0	0	1	1	0	0	1	0	1	0	1	1	0	1	0	0
0	1	1	0	1	0	1	0	1	0	0	1	0	1	0	1	0	1	0	1	1	0	1	0	1	0	0	1	0	1	0	1	1
1	0	1	0	1	0	0	1	0	1	0	1	1	0	1	0	1	0	0	1	1	0	0	1	0	1	0	1	0	1	1	0	0
1	0	1	0	0	1	1	0	1	0	0	1	0	1	0	1	0	1	0	1	1	0	1	0	0	1	1	0	1	0	0	1	1
0	1	0	1	0	1	1	0	1	0	1	0	0	1	0	1	0	1	0	1	1	0	1	0	1	0	1	0	0	1	0	1	1
1	0	0	1	0	1	0	1	0	1	0	1	1	0	1	0	1	0	0	1	1	0	0	1	0	1	0	1	1	0	0	1	0
1	0	0	1	1	0	0	1	0	1	0	1	0	1	0	1	1	0	1	0	0	1	0	1	0	1	0	1	0	1	0	1	0
1	0	0	1	0	1	0	1	0	1	0	1	0	1	0	0	1	0	1	0	1	0	1	0	0	0	0	0	0	1	0	0	0
1	0	1	0	1	0	1	0	1	0	0	1	1	0	0	1	0	1	1	0	0	1	0	1	0	1	0	1	0	1	1	0	1
0	1	1	0	1	0	1	0	1	0	1	0	0	1	0	1	0	1	0	1	1	0	1	0	1	0	1	0	0	1	0	1	1
1	0	1	0	0	1	1	0	1	0	1	0	0	1	0	1	0	1	1	0	1	0	1	0	1	0	1	0	0	1	0	0	1
0	1	1	0	0	1	1	0	1	0	1	0	0	1	0	1	0	1	1	0	1	0	1	0	1	0	1	0	0	1	0	0	1
1	0	0	1	0	1	1	0	1	0	0	1	1	0	0	1	0	1	0	1	1	0	1	0	0	1	0	1	1	0	0	1	1
0	1	0	1	0	1	1	0	1	0	1	0	0	1	0	1	0	1	0	1	1	0	1	0	0	1	1	0	1	0	0	1	1
0	1	0	1	0	1	1	0	0	0	0	1	1	0	0	0	1	0	1	0	0	1	1	0	0	1	0	1	1	0	0	0	1
0	1	0	1	0	1	1	0	0	1	0	1	1	0	0	1	0	0	0	1	1	0	1	0	0	1	0	1	1	0	0	0	1
1	0	0	1	1	0	0	1	0	1	0	1	1	0	1	0	1	0	1	0	0	1	0	1	0	1	0	1	1	0	1	0	0
1	0	0	1	1	0	1	0	0	1	0	1	1	0	1	0	0	0	1	0	1	0	0	1	0	1	0	1	1	0	0	1	1
0	1	0	1	1	0	0	1	1	0	1	0	0	1	0	1	0	1	1	0	0	1	1	0	1	0	0	1	1	0	0	1	1
1	0	0	1	1	0	0	1	0	1	0	1	1	0	1	0	1	0	1	0	1	0	0	1	0	1	0	1	1	0	0	1	0
0	1	0	1	0	1	1	0	1	0	1	0	0	1	0	1	0	1	1	0	0	1	1	0	1	0	1	0	1	0	0	1	1
0	1	0	0	0	1	1	0	1	0	0	1	0	1	0	1	0	1	0	1	1	0	1	0	1	0	1	0	0	1	0	0	1
1	0	0	1	1	0	0	1	0	1	0	1	1	0	1	0	1	0	0	1	1	0	0	1	0	1	0	1	1	0	1	0	0
0	1	0	0	0	1	1	0	1	0	1	0	0	1	0	1	0	1	1	0	1	0	1	0	1	0	1	0	0	1	0	0	1
0	1	1	0	0	1	1	0	1	0	1	0	0	1	0	1	0	1	1	0	0	1	1	0	1	0	1	0	0	1	0	0	1
1	0	1	0	0	1	1	0	1	0	1	0	0	1	0	1	0	1	1	0	1	0	1	0	1	0	1	0	0	1	0	1	1
1	0	0	1	0	1	1	0	1	0	0	1	0	1	0	1	0	0	1	0	0	1	0	1	1	0	1	0	0	1	0	1	1
1	0	1	0	1	0	0	1	0	1	0	1	1	0	1	0	1	0	0	1	0	1	0	1	0	1	0	1	1	0	0	0	0
1	0	1	0	0	1	1	0	1	0	0	1	0	1	0	1	1	0	1	0	0	1	1	0	1	0	0	1	0	0	0	1	1
0	1	1	0	0	1	1	0	1	0	1	0	0	1	0	1	0	1	1	0	1	0	1	0	1	0	1	0	0	1	0	1	1
0	1	1	0	0	1	1	0	1	0	1	0	0	1	0	1	0	1	0	1	1	0	1	0	1	0	0	1	0	1	0	1	1
0	1	1	0	1	0	0	1	0	1	0	1	1	0	1	0	1	0	1	0	0	1	0	1	0	1	0	1	1	0	1	0	0
1	0	1	0	1	0	0	1	0	1	0	1	1	0	1	0	1	0	0	1	0	1	0	1	1	0	0	1	1	0	0	1	0
1	0	0	0	0	1	0	0	1	0	0	1	0	1	0	1	0	1	0	1	0	1	1	0	0	0	0	0	0	1	0	1	1
1	0	0	1	0	1	1	0	0	1	0	0	0	1	1	0	1	0	0	1	0	1	1	0	0	1	1	0	0	1	0	1	1
1	0	1	0	1	0	0	1	0	1	1	0	0	1	1	0	0	1	0	1	1	0	1	0	1	0	0	1	1	0	0	1	0
1	0	1	0	0	1	1	0	1	0	1	0	0	1	0	1	0	1	0	1	0	1	1	0	1	0	1	0	0	1	0	1	1
1	0	1	0	1	0	0	1	0	1	0	1	0	1	1	0	1	0	0	1	1	0	0	1	1	0	0	1	0	1	0	1	0
1	0	1	0	1	0	0	1	0	1	0	1	1	0	1	0	1	0	0	1	1	0	0	1	0	1	0	1	1	0	0	1	0
0	1	1	0	1	0	0	1	0	1	0	1	1	0	1	0	1	0	0	1	1	0	0	1	0	1	0	1	1	0	1	0	0
0	1	1	0	0	1	1	0	1	0	1	0	0	1	0	1	0	1	0	1	1	0	0	1	1	0	1	0	0	1	0	0	1
1	0	0	1	0	1	0	1	0	1	0	1	0	1	0	1	0	1	1	0	1	0	0	1	0	1	0	1	1	0	0	1	0
1	0	0	1	1	0	1	0	1	0	0	1	0	1	1	0	0	1	1	0	0	1	1	0	1	0	1	0	0	1	0	1	1
1	0	1	0	0	1	0	1	0	1	0	1	0	1	0	1	0	1	0	1	1	0	0	1	0	1	0	1	0	1	0	1	0
1	0	0	1	1	0	0	1	1	0	0	1	0	1	0	1	0	1	1	0	0	1	1	0	0	1	1	0	0	1	0	0	1
1	0	1	0	0	1	0	1	0	1	0	1	0	1	1	0	1	0	0	1	0	1	0	1	0	1	0	1	1	0	0	1	0
1	0	0	1	0	1	1	0	1	0	0	1	0	1	0	1	0	1	0	1	1	0	0	0	1	0	1	0	0	1	0	1	1
0	1	1	0	0	1	0	1	1	0	1	0	1	0	0	1	0	1	0	1	1	0	1	0	1	0	0	1	0	1	0	1	0
1	0	1	0	1	0	0	1	0	1	0	1	1	0	1	0	1	0	1	0	1	0	0	1	0	1	0	1	1	0	1	0	0
1	0	1	0	1	0	0	1	0	1	0	1	1	0	1	0	1	0	1	0	1	0	0	1	0	1	0	1	1	0	1	0	0
0	1	0	1	0	1	1	0	1	0	0	1	0	1	0	1	0	1	0	1	0	1	0	1	0	1	0	1	1	0	0	0	1
1	0	1	0	1	0	0	1	0	1	0	1	1	0	1	0	1	0	0	1	0	0	0	1	0	1	0	1	1	0	0	1	0
0	1	1	0	0	1	1	0	1	0	0	1	0	1	0	1	0	1	0	1	1	0	1	0	0	1	1	0	1	0	0	1	1
0	1	1	0	0	1	1	0	0	1	0	1	0	1	1	0	0	1	0	1	1	0	1	0	0	1	0	1	1	0	0	0	1
0	1	0	1	0	1	1	0	1	0	0	1	0	1	0	1	0	1	0	1	0	1	0	1	0	1	1	0	1	0	0	1	1
0	1	0	1	1	0	0	1	0	1	0	1	1	0	1	0	1	0	0	1	0	1	1	0	0	1	1	0	1	0	1	0	0
0	1	0	1	1	0	0	1	0	1	0	1	1	0	1	0	1	0	1	0	0	1	1	0	0	1	0	1	1	0	0	1	0
1	0	0	1	1	0	1	0	0	1	0	1	1	0	1	0	1	0	0	1	0	1	1	0	0	1	0	1	1	0	1	0	1
0	1	1	0	0	1	1	0	1	0	1	0	0	1	0	1	1	0	0	1	0	1	1	0	1	0	1	0	1	0	0	0	1
0	1	0	1	0	1	1	0	0	1	0	1	0	1	0	1	1	0	0	1	0	1	1	0	1	0	1	0	0	1	0	0	1
1	0	0	1	0	1	1	0	1	0	0	1	0	1	0	1	1	0	0	1	1	0	1	0	1	0	1	0	0	1	0	1	1
1	0	0	1	1	0	0	1	0	1	0	1	1	0	1	0	1	0	1	0	1	0	1	0	0	1	0	1	1	0	0	1	0
0	1	0	1	0	1	1	0	0	0	0	1	0	1	0	1	1	0	0	1	0	0	0	0	1	0	1	0	0	1	0	1	1
0	1	0	1	0	1	1	0	0	0	1	0	0	1	0	1	0	1	0	1	1	0	1	0	1	0	1	0	0	1	0	0	1
1	0	0	1	0	1	0	1	0	1	0	1	1	0	1	0	1	0	1	0	0	1	0	1	0	0	0	1	1	0	1	0	1
1	0	0	1	0	1	0	0	0	1	0	1	1	0	0	1	1	0	0	1	0	0	1	0	0	1	0	1	0	0	0	1	1
1	0	0	1	1	0	0	1	0	1	0	1	1	0	1	0	1	0	1	0	1	0	0	1	0	1	0	1	1	0	0	1	0
1	0	0	1	1	0	0	1	0	1	0	1	1	0	1	0	1	0	1	0	0	1	0	1	1	0	0	1	1	0	1	0	1
0	1	0	0	0	1	1	0	1	0	1	0	0	1	0	1	0	1	1	0	0	1	1	0	1	0	1	0	0	1	0	1	1
1	0	0	1	1	0	0	1	0	1	0	1	0	0	0	0	1	0	1	0	0	0	0	0	0	1	0	0	0	0	0	0	0
1	0	1	0	1	0	0	1	0	1	0	1	1	0	1	0	1	0	1	0	1	0	0	1	0	1	0	1	1	0	0	1	0
1	0	1	0	1	0	0	1	0	1	0	1	1	0	1	0	1	0	1	0	1	0	0	1	0	1	0	1	1	0	0	1	0
0	1	0	1	0	1	1	0	1	0	0	1	0	0	0	1	0	1	1	0	0	1	1	0	0	1	1	0	0	1	0	1	1
0	1	0	1	0	1	1	0	0	1	0	1	0	1	0	1	0	1	0	1	0	1	1	0	0	1	0	1	1	0	0	0	1
0	1	0	1	1	0	0	1	0	1	0	1	1	0	1	0	1	0	1	0	0	1	1	0	0	1	0	1	1	0	0	0	1
0	1	0	1	0	1	1	0	0	1	0	1	1	0	0	1	0	1	0	1	0	1	1	0	1	0	1	0	1	0	0	1	1
0	1	0	1	0	1	0	1	0	1	0	1	1	0	1	0	1	0	1	0	0	1	0	1	0	1	0	1	1	0	0	1	1
0	1	0	1	1	0	1	0	0	1	0	1	1	0	1	0	1	0	1	0	0	1	0	1	0	1	0	1	0	1	1	0	1
1	0	0	0	0	1	1	0	0	1	0	1	1	0	0	1	1	0	1	0	0	1	1	0	1	0	1	0	1	0	0	0	1
0	1	0	1	0	1	1	0	0	1	0	1	1	0	0	1	0	1	1	0	0	1	1	0	1	0	0	1	1	0	0	0	1
1	0	0	1	0	1	0	1	0	1	0	1	1	0	1	0	1	0	1	0	1	0	0	1	0	1	0	1	1	0	0	0	1
0	1	1	0	0	1	1	0	1	0	1	0	0	1	0	1	0	1	0	0	0	1	1	0	1	0	1	0	0	1	0	0	1
0	0	0	0	1	0	1	0	0	0	0	1	0	0	1	0	1	0	1	0	0	1	0	1	1	0	0	1	1	0	0	0	1
0	1	0	1	1	0	1	0	1	0	1	0	1	0	0	1	0	1	1	0	0	1	1	0	1	0	1	0	0	1	1	0	1
0	1	0	1	1	0	0	1	0	1	0	1	1	0	1	0	1	0	1	0	0	1	0	1	0	1	0	1	1	0	0	1	0
0	0	0	0	0	0	0	0	1	0	0	1	1	0	0	1	0	1	1	0	1	0	0	1	0	1	1	0	1	0	0	0	0
0	1	0	1	0	0	0	0	0	0	0	1	1	0	1	0	1	0	1	0	0	1	1	0	0	1	1	0	1	0	0	1	1
0	1	0	1	0	1	0	0	1	0	1	0	1	0	0	1	1	0	1	0	0	1	0	0	1	0	1	0	0	1	0	1	1
0	1	0	1	0	1	1	0	0	1	0	1	1	0	0	1	1	0	1	0	0	1	1	0	0	1	1	0	0	1	0	1	1
0	1	0	1	1	0	1	0	0	1	0	0	1	0	1	0	1	0	1	0	0	1	1	0	0	1	0	1	1	0	0	1	1
1	0	0	1	0	1	1	0	0	1	0	1	1	0	0	1	1	0	1	0	1	0	1	0	1	0	1	0	1	0	0	1	1
1	0	0	1	1	0	0	1	0	0	0	1	1	0	1	0	1	0	0	1	1	0	0	1	0	1	0	1	1	0	1	0	0
1	0	0	1	1	0	0	1	0	1	0	1	1	0	0	0	1	0	1	0	0	0	0	0	0	0	0	1	1	0	0	0	0
1	0	0	1	1	0	0	1	0	1	0	1	1	0	1	0	1	0	0	1	0	1	0	1	0	1	0	1	1	0	1	0	0
0	0	1	0	0	1	0	1	1	0	0	1	0	1	0	1	0	1	0	1	1	0	0	1	1	0	0	1	1	0	0	1	0
1	0	0	1	1	0	0	1	0	1	0	1	1	0	1	0	1	0	0	1	1	0	0	1	0	0	0	1	1	0	1	0	0
0	1	0	1	1	0	0	1	0	1	0	1	1	0	1	0	1	0	0	1	1	0	0	1	0	1	0	1	1	0	0	1	0
1	0	1	0	1	0	0	1	0	1	0	1	1	0	1	0	1	0	1	0	1	0	0	1	0	1	0	1	1	0	0	1	0
0	1	1	0	0	1	1	0	0	1	0	1	1	0	1	0	0	1	0	1	1	0	1	0	0	1	0	1	1	0	0	1	1
1	0	1	0	1	0	0	1	0	1	0	1	1	0	1	0	1	0	1	0	0	1	0	1	0	1	0	1	1	0	1	0	1
0	1	1	0	0	1	1	0	1	0	0	1	0	1	0	1	0	1	1	0	1	0	0	1	0	0	0	1	0	1	0	1	1
1	0	1	0	1	0	0	1	0	1	0	1	1	0	1	0	1	0	1	0	1	0	0	1	0	1	0	1	1	0	1	0	0
1	0	1	0	1	0	0	1	0	1	0	1	1	0	1	0	1	0	1	0	0	1	0	1	0	1	0	1	1	0	0	1	0
0	1	1	0	0	1	1	0	1	0	0	1	0	1	0	1	0	1	0	1	0	1	1	0	1	0	1	0	1	0	0	1	1
1	0	1	0	1	0	0	1	0	1	0	1	1	0	1	0	1	0	0	1	1	0	0	1	0	1	0	1	1	0	0	1	0
0	1	0	1	0	1	0	1	0	1	0	1	0	1	0	1	1	0	0	1	0	0	0	0	0	0	0	1	1	0	0	1	0
0	1	0	1	0	1	1	0	1	0	1	0	0	1	0	1	0	1	1	0	1	0	1	0	1	0	1	0	1	0	0	1	1
1	0	0	1	0	1	1	0	1	0	0	1	0	1	0	1	0	0	0	1	1	0	1	0	1	0	1	0	1	0	0	1	1
0	1	0	1	1	0	0	1	0	1	0	1	1	0	1	0	1	0	0	1	1	0	1	0	0	1	0	1	1	0	0	1	0
0	1	0	1	0	1	1	0	1	0	1	0	0	1	0	1	0	1	0	1	0	1	1	0	0	1	1	0	1	0	0	1	1
0	1	0	1	0	1	1	0	1	0	1	0	0	1	0	1	1	0	0	1	1	0	1	0	1	0	1	0	1	0	0	1	1
0	1	0	1	0	1	1	0	1	0	1	0	0	1	0	1	0	1	1	0	1	0	1	0	1	0	1	0	1	0	0	1	1
0	1	0	1	0	1	0	1	0	1	0	1	0	1	0	1	1	0	0	1	1	0	1	0	0	1	0	1	1	0	0	1	0
1	0	0	1	0	1	1	0	0	1	0	1	0	1	0	1	1	0	1	0	0	1	1	0	0	1	1	0	0	1	0	1	1
1	0	1	0	0	1	1	0	1	0	0	1	0	1	0	1	0	1	1	0	0	1	1	0	1	0	1	0	0	1	0	1	1
1	0	0	1	0	1	1	0	1	0	0	1	0	1	0	1	0	1	1	0	0	1	1	0	1	0	0	1	0	1	0	1	1
1	0	0	1	0	1	1	0	1	0	0	0	0	1	0	1	0	1	0	1	0	1	1	0	0	0	0	1	0	1	0	1	1
1	0	1	0	0	1	1	0	1	0	1	0	0	1	0	1	1	0	0	1	0	1	1	0	1	0	1	0	0	1	0	0	1
0	1	1	0	0	1	1	0	1	0	1	0	0	1	0	1	0	1	0	1	1	0	1	0	1	0	1	0	0	1	0	1	1
1	0	1	0	1	0	0	1	0	1	0	1	0	1	0	1	1	0	0	1	1	0	0	1	0	1	0	1	1	0	0	1	0
0	0	0	0	0	0	1	0	1	0	1	0	0	1	0	1	0	1	0	1	1	0	1	0	0	1	1	0	0	1	0	1	1
0	1	1	0	0	1	1	0	0	0	1	0	0	1	0	1	0	1	0	1	1	0	0	1	1	0	0	0	0	1	0	1	1
1	0	1	0	0	1	0	1	0	1	0	1	1	0	1	0	0	1	0	1	1	0	0	1	0	1	0	1	1	0	0	1	0
1	0	1	0	0	1	1	0	1	0	1	0	0	1	0	1	0	1	0	1	1	0	1	0	1	0	1	0	1	0	0	1	1
1	0	0	0	1	0	0	1	0	1	0	1	1	0	1	0	1	0	1	0	0	1	0	1	0	1	0	1	1	0	0	1	0
1	0	1	0	1	0	0	1	0	1	0	1	0	0	0	0	0	0	0	0	1	0	0	1	0	1	0	1	1	0	0	1	0
1	0	0	1	1	0	0	1	0	1	0	1	1	0	1	0	1	0	0	1	1	0	0	1	0	1	0	1	0	0	1	0	0
