# Supplementary material
Source: ML conference proceedings conference paper supplement (https://proceedings.neurips.cc/paper_files/paper/2022/hash/5afaa8b4dd18eb1eed055d2d821b58ae-Abstract.html)
Supplement: Supplementary file 1 [file 5afaa8b4dd18eb1eed055d2d821b58ae-Supplemental-Conference.zip › 6769_exploring_the_whole_rashomon_s-Supplementary Material/6769_code_repo/include/simdpp/core/align.h]

/*  Copyright (C) 2013-2014  Povilas Kanapickas <povilas@radix.lt>

    Distributed under the Boost Software License, Version 1.0.
        (See accompanying file LICENSE_1_0.txt or copy at
            http://www.boost.org/LICENSE_1_0.txt)
*/

#ifndef LIBSIMDPP_SIMDPP_CORE_ALIGN_H
#define LIBSIMDPP_SIMDPP_CORE_ALIGN_H

#ifndef LIBSIMDPP_SIMD_H
    #error "This file must be included through simd.h"
#endif

#include <simdpp/types.h>
#include <simdpp/detail/insn/align.h>
#include <simdpp/detail/get_expr.h>

namespace simdpp {
namespace SIMDPP_ARCH_NAMESPACE {


/** Extracts a int8x16 vector from two concatenated int8x16 vectors

    @code
    shift:  pos:| 0   1    .  14  15  |
     0      r = [ l0  l1   .  l14 l15 ]
     1      r = [ l1  l2   .  l15 u0  ]
     2      r = [ l2  l3   .  u0  l1  ]
      ...    ..   .. ..  ... .. ..
     15     r = [ l15 u0   .  u13 u14 ]
     16     r = [ u0  u1   .  u14 u15 ]
    @endcode

    @par 128-bit version:
    @icost{SSE2-SSE3, 3}

    @par 256-bit version:
    The lower and higher 128-bit halves are processed as if 128-bit instruction
    was applied to each of them separately.

    @icost{SSE2-SSE3, 6}
    @icost{SSSE3-AVX, NEON, ALTIVEC, 2}
*/
template<unsigned shift, unsigned N, class V1, class V2> SIMDPP_INL
typename detail::get_expr2_nomask<V1, V2>::empty
    align16(const any_vec8<N,V1>& lower,
            const any_vec8<N,V2>& upper)
{
    static_assert(shift <= 16, "Shift out of bounds");
    if (shift == 0) return lower.wrapped().eval();
    if (shift == 16) return upper.wrapped().eval();

    typename detail::get_expr2_nomask_nosign<V1, V2>::type qlower, qupper;
    qlower = lower.wrapped().eval();
    qupper = upper.wrapped().eval();
    return detail::insn::i_align16<shift>(qlower, qupper);
}

/** Extracts a int16x8 vector from two concatenated int16x8 vectors

    @code
    shift:  pos:| 0  1    .  6  7  |
     0      r = [ l0 l1   .  l6 l7 ]
     1      r = [ l1 l2   .  l7 u0 ]
     2      r = [ l2 l3   .  u0 l1 ]
      ...    ..   .. ..  ... .. ..
     7      r = [ l3 u0   .  u5 u6 ]
     8      r = [ u0 u1   .  u6 u7 ]
    @endcode

    @par 128-bit version:
    @icost{SSE2-SSE3, 3}

    @par 256-bit version:
    @icost{SSE2-SSE3, 6}
    @icost{SSSE3-AVX, NEON, ALTIVEC, 2}

    The all 128-bit sub-vectors are processed as if 128-bit instruction
    was applied to each of them separately.
*/
template<unsigned shift, unsigned N, class V1, class V2> SIMDPP_INL
typename detail::get_expr2_nomask<V1, V2>::empty
    align8(const any_vec16<N,V1>& lower,
           const any_vec16<N,V2>& upper)
{
    static_assert(shift <= 8, "Shift out of bounds");
    if (shift == 0) return lower.wrapped().eval();
    if (shift == 8) return upper.wrapped().eval();

    typename detail::get_expr2_nomask_nosign<V1, V2>::type qlower, qupper;
    qlower = lower.wrapped().eval();
    qupper = upper.wrapped().eval();
    return detail::insn::i_align8<shift>(qlower, qupper);
}

/** Extracts a int32x4 vector from two concatenated int32x4 vectors

    @code
    shift:  pos:| 0  1  2  3  |
     0      r = [ l0 l1 l2 l3 ]
     1      r = [ l1 l2 l3 u0 ]
     2      r = [ l2 l3 u0 u1 ]
     3      r = [ l3 u0 u1 u2 ]
     4      r = [ u0 u1 u2 u3 ]
    @endcode

    @par int32

    @par 128-bit version:
    @icost{SSE2-SSE3, 3}

    @par 256-bit version:
    The lower and higher 128-bit halves are processed as if 128-bit instruction
    was applied to each of them separately.

    @icost{SSE2-SSE3, 6}
    @icost{SSSE3-AVX, NEON, ALTIVEC, 2}

    @par float32

    @par 128-bit version:
    @icost{SSE2-SSE3, 3}

    @par 256-bit version:
    The lower and higher 128-bit halves are processed as if 128-bit instruction
    was applied to each of them separately.

    @icost{SSE2-SSE3, 6}
    @icost{SSSE3-SSE4.1 NEON, ALTIVEC, 2}
*/
template<unsigned shift, unsigned N, class V1, class V2> SIMDPP_INL
typename detail::get_expr2_nomask<V1, V2>::empty
    align4(const any_vec32<N,V1>& lower,
           const any_vec32<N,V2>& upper)
{
    static_assert(shift <= 4, "Shift out of bounds");
    if (shift == 0) return lower.wrapped().eval();
    if (shift == 4) return upper.wrapped().eval();

    typename detail::get_expr2_nomask_nosign<V1, V2>::type qlower, qupper;
    qlower = lower.wrapped().eval();
    qupper = upper.wrapped().eval();
    return detail::insn::i_align4<shift>(qlower, qupper);
}


/** Extracts a int64x2 vector from two concatenated int64x2 vectors

    @code
    shift:  pos:| 0  1  |
     0      r = [ l0 l1 ]
     1      r = [ l1 u0 ]
     2      r = [ u0 u1 ]
    @endcode

    @par int64

    @par 128-bit version:
    @icost{SSE2-SSE3, 3}

    @par 256-bit version:
    The lower and higher 128-bit halves are processed as if 128-bit instruction
    was applied to each of them separately.

    @icost{SSE2-SSE3, 6}
    @icost{SSSE3-AVX, NEON, ALTIVEC, 2}

    @par float64

    @par 128-bit version:
    @icost{SSE2-SSE3, 3}

    @par 256-bit version:
    The lower and higher 128-bit halves are processed as if 128-bit instruction
    was applied to each of them separately.

    @icost{SSE2-SSE3, 6}
    @icost{SSSE3-SSE4.1 NEON, ALTIVEC, 2}
*/
template<unsigned shift, unsigned N, class V1, class V2> SIMDPP_INL
typename detail::get_expr2_nomask<V1, V2>::empty
    align2(const any_vec64<N,V1>& lower,
           const any_vec64<N,V2>& upper)
{
    static_assert(shift <= 2, "Shift out of bounds");
    if (shift == 0) return lower.wrapped().eval();
    if (shift == 2) return upper.wrapped().eval();

    typename detail::get_expr2_nomask_nosign<V1, V2>::type qlower, qupper;
    qlower = lower.wrapped().eval();
    qupper = upper.wrapped().eval();
    return detail::insn::i_align2<shift>(qlower, qupper);
}

} // namespace SIMDPP_ARCH_NAMESPACE
} // namespace simdpp

#endif
