# Supplementary material
Source: ML conference proceedings conference paper supplement (https://proceedings.neurips.cc/paper_files/paper/2022/hash/5afaa8b4dd18eb1eed055d2d821b58ae-Abstract.html)
Supplement: Supplementary file 1 [file 5afaa8b4dd18eb1eed055d2d821b58ae-Supplemental-Conference.zip › 6769_exploring_the_whole_rashomon_s-Supplementary Material/6769_code_repo/include/simdpp/core/cache.h]

/*  Copyright (C) 2011-2014  Povilas Kanapickas <povilas@radix.lt>

    Distributed under the Boost Software License, Version 1.0.
        (See accompanying file LICENSE_1_0.txt or copy at
            http://www.boost.org/LICENSE_1_0.txt)
*/

#ifndef LIBSIMDPP_SIMDPP_CACHE_H
#define LIBSIMDPP_SIMDPP_CACHE_H

#ifndef LIBSIMDPP_SIMD_H
    #error "This file must be included through simd.h"
#endif
#include <simdpp/setup_arch.h>

namespace simdpp {
namespace SIMDPP_ARCH_NAMESPACE {

/** Prefetches data to the lowest level cache for reading.

    @param ptr pointer to the data to prefetch
*/
template<class T>
SIMDPP_INL void prefetch_read(const T* ptr)
{
#if SIMDPP_USE_SSE2
    _mm_prefetch(reinterpret_cast<const char*>(ptr), _MM_HINT_T0);
#elif SIMDPP_USE_NEON || SIMDPP_USE_ALTIVEC || SIMDPP_USE_MSA
#if __GNUC__
    // on NEON results in PLD
    // on Altivec results in DST
    // on MSA results in PREF
    __builtin_prefetch(ptr, 0);
#endif
#endif
    (void) ptr;
}

/** Prefetches data to the lowest level cache for writing.

    @param ptr pointer to the data to prefetch
*/
template<class T>
SIMDPP_INL void prefetch_write(const T* ptr)
{
#if SIMDPP_USE_SSE2
    _mm_prefetch(reinterpret_cast<const char*>(ptr), _MM_HINT_T0);
#elif SIMDPP_USE_NEON || SIMDPP_USE_ALTIVEC || SIMDPP_USE_MSA
#if __GNUC__
    // on NEON results in PLDW
    // on Altivec results in DSTST
    // on MSA results in PREF
    __builtin_prefetch(ptr, 1);
#endif
#endif
    (void) ptr;
}

} // namespace SIMDPP_ARCH_NAMESPACE
} // namespace simdpp

#endif
