# Supplementary material
Source: ML conference proceedings conference paper supplement (https://proceedings.neurips.cc/paper_files/paper/2022/hash/5afaa8b4dd18eb1eed055d2d821b58ae-Abstract.html)
Supplement: Supplementary file 1 [file 5afaa8b4dd18eb1eed055d2d821b58ae-Supplemental-Conference.zip › 6769_exploring_the_whole_rashomon_s-Supplementary Material/6769_code_repo/include/simdpp/core/cast.h]

/*  Copyright (C) 2011-2014  Povilas Kanapickas <povilas@radix.lt>

    Distributed under the Boost Software License, Version 1.0.
        (See accompanying file LICENSE_1_0.txt or copy at
            http://www.boost.org/LICENSE_1_0.txt)
*/

#ifndef LIBSIMDPP_SIMDPP_CORE_CAST_H
#define LIBSIMDPP_SIMDPP_CORE_CAST_H

#ifndef LIBSIMDPP_SIMD_H
    #error "This file must be included through simd.h"
#endif

#include <simdpp/setup_arch.h>
#include <simdpp/detail/cast.h>
#include <simdpp/types/traits.h>

namespace simdpp {
namespace SIMDPP_ARCH_NAMESPACE {

namespace detail {

// on certain architectures mask-mask conversions may need unmasking or remasking
template<class R, class T> struct cast_mask_override { static const unsigned value = CAST_MASK_MEMCPY; };
#if SIMDPP_USE_NEON_NO_FLT_SP
template<unsigned N>
struct cast_mask_override<mask_float32<N>, mask_int32<N>> { static const unsigned value = CAST_MASK_UNMASK; };
template<unsigned N>
struct cast_mask_override<mask_int32<N>, mask_float32<N>> { static const unsigned value = CAST_MASK_REMASK; };
#endif
#if SIMDPP_USE_NEON && SIMDPP_32_BITS
template<unsigned N>
struct cast_mask_override<mask_int64<N>, mask_float64<N>> { static const unsigned value = CAST_MASK_UNMASK; };
template<unsigned N>
struct cast_mask_override<mask_float64<N>, mask_int64<N>> { static const unsigned value = CAST_MASK_REMASK; };
#endif
#if SIMDPP_USE_VSX_206 && !SIMDPP_USE_VSX_207
template<unsigned N>
struct cast_mask_override<mask_int64<N>, mask_float64<N>> { static const unsigned value = CAST_MASK_REMASK; };
template<unsigned N>
struct cast_mask_override<mask_float64<N>, mask_int64<N>> { static const unsigned value = CAST_MASK_UNMASK; };
#endif

template<class R, class T> SIMDPP_INL
void bit_cast_impl(const T& t, R& r)
{
    const bool is_vector_r = is_vector<R>::value;
    const bool is_vector_t = is_vector<T>::value;
    const bool is_mask_r = is_mask<R>::value;
    const bool is_mask_t = is_mask<T>::value;
    const unsigned mask_mask_cast_override = detail::cast_mask_override<R,T>::value;

    const unsigned cast_type =
            (!is_vector_t && !is_vector_r) ? CAST_TYPE_OTHER :
            (!is_mask_t && !is_mask_r) ? CAST_TYPE_VECTOR_TO_VECTOR :
            (is_mask_t && !is_mask_r) ? CAST_TYPE_MASK_TO_VECTOR :
            (!is_mask_t && is_mask_r) ? CAST_TYPE_VECTOR_TO_MASK :
            // remaining cases deal with is_mask_t && is_mask_r
            (mask_mask_cast_override == CAST_MASK_REMASK) ? CAST_TYPE_MASK_TO_MASK_REMASK :
            (mask_mask_cast_override == CAST_MASK_UNMASK) ? CAST_TYPE_MASK_TO_MASK_UNMASK :
                                                            CAST_TYPE_MASK_TO_MASK_BITWISE;

    static_assert(is_vector_r == is_vector_t,
                  "bit_cast can't convert between vector and non-vector types");

    detail::cast_wrapper<cast_type>::run(t, r);
}

template<class T> SIMDPP_INL
void bit_cast_impl(const T& t, T& r)
{
    // Simple implementation for the common case
    r = t;
}

} // namespace detail

/** Casts between unrelated types. No changes to the stored values are
    performed.

    Conversions between vector and non-vector types are not allowed.

    Conversion from non-mask type to mask type is not allowed.

    Conversion from mask type to a non-mask type is not a costless operation
    because masks may have different logical and physical layout (e.g., in
    some implementations one bit represents entire element in a vector).

    Conversions between mask types is only allowed if the element size is the
    same.
*/
template<class R, class T> SIMDPP_INL
R bit_cast(const T& t)
{
    R r;
    detail::bit_cast_impl(t, r);
    return r;
}

} // namespace SIMDPP_ARCH_NAMESPACE
} // namespace simdpp

#endif
