# Supplementary material
Source: ML conference proceedings conference paper supplement (https://proceedings.neurips.cc/paper_files/paper/2022/hash/5afaa8b4dd18eb1eed055d2d821b58ae-Abstract.html)
Supplement: Supplementary file 1 [file 5afaa8b4dd18eb1eed055d2d821b58ae-Supplemental-Conference.zip › 6769_exploring_the_whole_rashomon_s-Supplementary Material/6769_code_repo/include/simdpp/core/detail/get_expr_uint.h]

/*  Copyright (C) 2014  Povilas Kanapickas <povilas@radix.lt>

    Distributed under the Boost Software License, Version 1.0.
        (See accompanying file LICENSE_1_0.txt or copy at
            http://www.boost.org/LICENSE_1_0.txt)
*/

#ifndef LIBSIMDPP_SIMDPP_CORE_DETAIL_GET_EXPR_UINT_H
#define LIBSIMDPP_SIMDPP_CORE_DETAIL_GET_EXPR_UINT_H

#include <simdpp/detail/get_expr.h>

namespace simdpp {
namespace SIMDPP_ARCH_NAMESPACE {
namespace detail {


/*  We want to reduce the number of overloads that need to be created in order
    to match a specific case of an expression tree containing various integer
    operation nodes, such as add(int), mul_lo(int), etc. For particular
    vector size each of these operations are equivalent regardless of the
    argument types. Thus we simply convert the arguments of the expression to
    uint expressions of certain configuration.

    As a result, the following tuples of types will appear as the arguments
     of the returned expression:

      * uint8, uint8
      * uint16, uint16
      * uint32, uint32
      * uint64, uint64
*/

template<class V1, class V2>
struct expr2_uint_maybe_scalar_tags {
    static const unsigned v1_type_tag = V1::type_tag;
    static const unsigned v1_size_tag = V1::size_tag;
    static const unsigned v2_type_tag = V2::type_tag;
    static const unsigned v2_size_tag = V2::size_tag;
    static const unsigned length_bytes = V1::length_bytes;
};

template<class V2>
struct expr2_uint_maybe_scalar_tags<int, V2> {
    static const unsigned v1_type_tag = SIMDPP_TAG_INT;
    static const unsigned v1_size_tag = V2::size_tag;
    static const unsigned v2_type_tag = V2::type_tag;
    static const unsigned v2_size_tag = V2::size_tag;
    static const unsigned length_bytes = V2::length_bytes;
};

template<class V2>
struct expr2_uint_maybe_scalar_tags<long, V2> {
    static const unsigned v1_type_tag = SIMDPP_TAG_INT;
    static const unsigned v1_size_tag = V2::size_tag;
    static const unsigned v2_type_tag = V2::type_tag;
    static const unsigned v2_size_tag = V2::size_tag;
    static const unsigned length_bytes = V2::length_bytes;
};

template<class V2>
struct expr2_uint_maybe_scalar_tags<long long, V2> {
    static const unsigned v1_type_tag = SIMDPP_TAG_INT;
    static const unsigned v1_size_tag = V2::size_tag;
    static const unsigned v2_type_tag = V2::type_tag;
    static const unsigned v2_size_tag = V2::size_tag;
    static const unsigned length_bytes = V2::length_bytes;
};

template<class V2>
struct expr2_uint_maybe_scalar_tags<unsigned, V2> {
    static const unsigned v1_type_tag = SIMDPP_TAG_UINT;
    static const unsigned v1_size_tag = V2::size_tag;
    static const unsigned v2_type_tag = V2::type_tag;
    static const unsigned v2_size_tag = V2::size_tag;
    static const unsigned length_bytes = V2::length_bytes;
};

template<class V2>
struct expr2_uint_maybe_scalar_tags<unsigned long, V2> {
    static const unsigned v1_type_tag = SIMDPP_TAG_UINT;
    static const unsigned v1_size_tag = V2::size_tag;
    static const unsigned v2_type_tag = V2::type_tag;
    static const unsigned v2_size_tag = V2::size_tag;
    static const unsigned length_bytes = V2::length_bytes;
};

template<class V2>
struct expr2_uint_maybe_scalar_tags<unsigned long long, V2> {
    static const unsigned v1_type_tag = SIMDPP_TAG_UINT;
    static const unsigned v1_size_tag = V2::size_tag;
    static const unsigned v2_type_tag = V2::type_tag;
    static const unsigned v2_size_tag = V2::size_tag;
    static const unsigned length_bytes = V2::length_bytes;
};

template<class V2>
struct expr2_uint_maybe_scalar_tags<float, V2> {
    static const unsigned v1_type_tag = SIMDPP_TAG_INT;
    static const unsigned v1_size_tag = V2::size_tag;
    static const unsigned v2_type_tag = V2::type_tag;
    static const unsigned v2_size_tag = V2::size_tag;
    static const unsigned length_bytes = V2::length_bytes;
};

template<class V2>
struct expr2_uint_maybe_scalar_tags<double, V2> {
    static const unsigned v1_type_tag = SIMDPP_TAG_INT;
    static const unsigned v1_size_tag = V2::size_tag;
    static const unsigned v2_type_tag = V2::type_tag;
    static const unsigned v2_size_tag = V2::size_tag;
    static const unsigned length_bytes = V2::length_bytes;
};


template<class V1>
struct expr2_uint_maybe_scalar_tags<V1, int> {
    static const unsigned v1_type_tag = V1::type_tag;
    static const unsigned v1_size_tag = V1::size_tag;
    static const unsigned v2_type_tag = SIMDPP_TAG_INT;
    static const unsigned v2_size_tag = V1::size_tag;
    static const unsigned length_bytes = V1::length_bytes;
};

template<class V1>
struct expr2_uint_maybe_scalar_tags<V1, long> {
    static const unsigned v1_type_tag = V1::type_tag;
    static const unsigned v1_size_tag = V1::size_tag;
    static const unsigned v2_type_tag = SIMDPP_TAG_INT;
    static const unsigned v2_size_tag = V1::size_tag;
    static const unsigned length_bytes = V1::length_bytes;
};

template<class V1>
struct expr2_uint_maybe_scalar_tags<V1, long long> {
    static const unsigned v1_type_tag = V1::type_tag;
    static const unsigned v1_size_tag = V1::size_tag;
    static const unsigned v2_type_tag = SIMDPP_TAG_INT;
    static const unsigned v2_size_tag = V1::size_tag;
    static const unsigned length_bytes = V1::length_bytes;
};

template<class V1>
struct expr2_uint_maybe_scalar_tags<V1, unsigned> {
    static const unsigned v1_type_tag = V1::type_tag;
    static const unsigned v1_size_tag = V1::size_tag;
    static const unsigned v2_type_tag = SIMDPP_TAG_UINT;
    static const unsigned v2_size_tag = V1::size_tag;
    static const unsigned length_bytes = V1::length_bytes;
};

template<class V1>
struct expr2_uint_maybe_scalar_tags<V1, unsigned long> {
    static const unsigned v1_type_tag = V1::type_tag;
    static const unsigned v1_size_tag = V1::size_tag;
    static const unsigned v2_type_tag = SIMDPP_TAG_UINT;
    static const unsigned v2_size_tag = V1::size_tag;
    static const unsigned length_bytes = V1::length_bytes;
};

template<class V1>
struct expr2_uint_maybe_scalar_tags<V1, unsigned long long> {
    static const unsigned v1_type_tag = V1::type_tag;
    static const unsigned v1_size_tag = V1::size_tag;
    static const unsigned v2_type_tag = SIMDPP_TAG_UINT;
    static const unsigned v2_size_tag = V1::size_tag;
    static const unsigned length_bytes = V1::length_bytes;
};

template<class V1>
struct expr2_uint_maybe_scalar_tags<V1, float> {
    static const unsigned v1_type_tag = V1::type_tag;
    static const unsigned v1_size_tag = V1::size_tag;
    static const unsigned v2_type_tag = SIMDPP_TAG_INT;
    static const unsigned v2_size_tag = V1::size_tag;
    static const unsigned length_bytes = V1::length_bytes;
};

template<class V1>
struct expr2_uint_maybe_scalar_tags<V1, double> {
    static const unsigned v1_type_tag = V1::type_tag;
    static const unsigned v1_size_tag = V1::size_tag;
    static const unsigned v2_type_tag = SIMDPP_TAG_INT;
    static const unsigned v2_size_tag = V1::size_tag;
    static const unsigned length_bytes = V1::length_bytes;
};

template<class V1, class V2>
struct get_expr_uint_impl {
    using tags = expr2_uint_maybe_scalar_tags<V1, V2>;

#if SIMDPP_EXPR_DEBUG
    static_assert(tags::v1_size_tag == tags::v2_size_tag, "Mismatching vector sizes");
    static_assert(tags::v1_type_tag == SIMDPP_TAG_MASK_INT ||
                  tags::v1_type_tag == SIMDPP_TAG_UINT ||
                  tags::v1_type_tag == SIMDPP_TAG_INT, "Incorrect type parameter");
    static_assert(tags::v2_type_tag == SIMDPP_TAG_MASK_INT ||
                  tags::v2_type_tag == SIMDPP_TAG_UINT ||
                  tags::v2_type_tag == SIMDPP_TAG_INT, "Incorrect type parameter");
#endif

    // the size tag of the expression
    static const unsigned size_tag = tags::v1_size_tag;

    // (type_tag) get the type tag of the expression. Pretty much the same as
    // get_expr2_nomask does
    static const unsigned type_tag_t1 = tags::v1_type_tag > tags::v2_type_tag ? tags::v1_type_tag : tags::v2_type_tag;
    static const unsigned type_tag = (type_tag_t1 == SIMDPP_TAG_MASK_INT) ? SIMDPP_TAG_UINT : type_tag_t1;

    // strip signed integer types and masks
    static const unsigned v1_type_tag = SIMDPP_TAG_UINT;
    static const unsigned v2_type_tag = SIMDPP_TAG_UINT;

    using v1_final_type = typename type_of_tag<v1_type_tag + size_tag,
                                               tags::length_bytes, void>::type;
    using v2_final_type = typename type_of_tag<v2_type_tag + size_tag,
                                               tags::length_bytes, void>::type;
};

template<template<class, class> class E, class V1, class V2>
struct get_expr_uint {
    using impl = get_expr_uint_impl<V1, V2>;

    using type = typename type_of_tag<impl::type_tag + impl::size_tag,
                                      impl::tags::length_bytes,
                                      E<V1, V2>>::type;
};

} // namespace detail
} // namespace SIMDPP_ARCH_NAMESPACE
} // namespace simdpp

#endif
