# Supplementary material
Source: ML conference proceedings conference paper supplement (https://proceedings.neurips.cc/paper_files/paper/2022/hash/5afaa8b4dd18eb1eed055d2d821b58ae-Abstract.html)
Supplement: Supplementary file 1 [file 5afaa8b4dd18eb1eed055d2d821b58ae-Supplemental-Conference.zip › 6769_exploring_the_whole_rashomon_s-Supplementary Material/6769_code_repo/include/simdpp/core/i_div_p.h]

/*  Copyright (C) 2013-2014  Povilas Kanapickas <povilas@radix.lt>

    Distributed under the Boost Software License, Version 1.0.
        (See accompanying file LICENSE_1_0.txt or copy at
            http://www.boost.org/LICENSE_1_0.txt)
*/

#ifndef LIBSIMDPP_SIMDPP_CORE_I_DIV_P_H
#define LIBSIMDPP_SIMDPP_CORE_I_DIV_P_H

#ifndef LIBSIMDPP_SIMD_H
    #error "This file must be included through simd.h"
#endif

#include <simdpp/types.h>
#include <simdpp/core/bit_and.h>
#include <simdpp/core/bit_andnot.h>
#include <simdpp/core/bit_or.h>
#include <simdpp/core/cmp_lt.h>
#include <simdpp/core/i_sub.h>
#include <simdpp/detail/null/math.h>

namespace simdpp {
namespace SIMDPP_ARCH_NAMESPACE {

// FIXME: move to adv
/** Divides one 8-bit unsigned number by another. The precision of the operation
    is configurable: only P least significant bits of both numerator and
    denumerator are considered.

    @code
    r0 = num0 / den0
    ...
    rN = numN / denN
    @endcode
    @par 128-bit version:
    The operations costs at least 9 instructions per bit of precision.

    @par 256-bit version:
    @icost{SSE2-AVX, NEON, 10}
    @icost{AVX2, 4}
*/
template<unsigned P> SIMDPP_INL
uint8x16 div_p(const uint8x16& num, const uint8x16& den)
{
#if SIMDPP_USE_NULL
    return detail::null::div_p<P>(num, den);
#else
    static_assert(P <= 8, "Precision too large");
    uint8x16 r, q, bit_mask;
    r = q = make_zero();
    bit_mask = make_uint(1 << (P-1));

    for (unsigned i = P; i > 0; i--) {
        unsigned bit = i-1;
        uint8x16 n_bit;
        // we'll never shift out any bits, so larger shift doesn't matter
        r = shift_l<1>((uint16x8)r);

        n_bit = bit_and(num, bit_mask);
        n_bit = shift_r((uint16x8)n_bit, bit);
        r = bit_or(r, n_bit);

        uint8x16 cmp, csub, cbit;
        cmp = cmp_lt(r, den);

        csub = bit_andnot(den, cmp);
        cbit = bit_andnot(bit_mask, cmp);
        r = sub(r, csub);
        q = bit_or(q, cbit);

        bit_mask = shift_r<1>((uint16x8)bit_mask);
    }
    return q;

    /*
    The actual algorithm is as follows:
    N - numerator, D - denominator, R - remainder, Q - quetient
    R = 0; Q = 0;
    for (unsigned i = P; i > 0; i--) {
        unsigned bit = i-1;
        R <<= 1;
        R |= (N >> bit) & 1;
        if (R >= D) {
            R = R - D;
            Q |= 1 << bit;
        }
    }*/
#endif
}

template<unsigned P> SIMDPP_INL
uint16x8 div_p(const uint16x8& num, const uint16x8& den)
{
#if SIMDPP_USE_NULL
    return detail::null::div_p<P>(num, den);
#else
    static_assert(P <= 16, "Precision too large");
    uint16x8 r, q, bit_mask;

    r = q = make_zero();
    bit_mask = make_uint(1 << (P-1));

    for (unsigned i = P; i > 0; i--) {
        unsigned bit = i-1; // TODO precision
        uint16x8 n_bit;
        r = shift_l<1>(r);

        n_bit = bit_and(num, bit_mask);
        n_bit = shift_r(n_bit, bit);
        r = bit_or(r, n_bit);

        uint16x8 cmp, csub, cbit;
        cmp = cmp_lt(r, den);

        csub = bit_andnot(den, cmp);
        cbit = bit_andnot(bit_mask, cmp);
        r = sub(r, csub);
        q = bit_or(q, cbit);

        bit_mask = shift_r<1>(bit_mask);
    }
    return q;
#endif
}

} // namespace SIMDPP_ARCH_NAMESPACE
} // namespace simdpp

#endif
