# Supplementary material
Source: ML conference proceedings conference paper supplement (https://proceedings.neurips.cc/paper_files/paper/2022/hash/5afaa8b4dd18eb1eed055d2d821b58ae-Abstract.html)
Supplement: Supplementary file 1 [file 5afaa8b4dd18eb1eed055d2d821b58ae-Supplemental-Conference.zip › 6769_exploring_the_whole_rashomon_s-Supplementary Material/6769_code_repo/include/simdpp/core/i_sub_sat.h]

/*  Copyright (C) 2013-2014  Povilas Kanapickas <povilas@radix.lt>

    Distributed under the Boost Software License, Version 1.0.
        (See accompanying file LICENSE_1_0.txt or copy at
            http://www.boost.org/LICENSE_1_0.txt)
*/

#ifndef LIBSIMDPP_SIMDPP_CORE_I_SUBS_H
#define LIBSIMDPP_SIMDPP_CORE_I_SUBS_H

#ifndef LIBSIMDPP_SIMD_H
    #error "This file must be included through simd.h"
#endif

#include <simdpp/types.h>
#include <simdpp/detail/expr/i_sub_sat.h>
#include <simdpp/core/detail/scalar_arg_impl.h>

namespace simdpp {
namespace SIMDPP_ARCH_NAMESPACE {

/** Subtracts and saturaters signed 8-bit integer values.

    @code
    r0 = saturated(a0 - b0)
    ...
    rN = saturated(aN - bN)
    @endcode

    @par 256-bit version:
    @icost{SSE2-AVX, NEON, ALTIVEC, 2}
*/
template<unsigned N, class E1, class E2> SIMDPP_INL
int8<N, expr_isub_sat<int8<N,E1>,
                      int8<N,E2>>> sub_sat(const int8<N,E1>& a,
                                           const int8<N,E2>& b)
{
    return { { a, b } };
}

SIMDPP_SCALAR_ARG_IMPL_EXPR(sub_sat, expr_isub_sat, int8, int8)

/** Subtracts and saturaters signed 16-bit integer values.

    @code
    r0 = saturated(a0 - b0)
    ...
    rN = saturated(aN - bN)
    @endcode

    @par 256-bit version:
    @icost{SSE2-AVX, NEON, ALTIVEC, 2}
*/
template<unsigned N, class E1, class E2> SIMDPP_INL
int16<N, expr_isub_sat<int16<N,E1>,
                       int16<N,E2>>> sub_sat(const int16<N,E1>& a,
                                             const int16<N,E2>& b)
{
    return { { a, b } };
}

SIMDPP_SCALAR_ARG_IMPL_EXPR(sub_sat, expr_isub_sat, int16, int16)

/** Subtracts and saturaters unsigned 8-bit integer values.

    @code
    r0 = saturated(a0 - b0)
    ...
    rN = saturated(aN - bN)
    @endcode

    @par 256-bit version:
    @icost{SSE2-AVX, NEON, ALTIVEC, 2}
*/
template<unsigned N, class E1, class E2> SIMDPP_INL
uint8<N, expr_isub_sat<uint8<N,E1>,
                       uint8<N,E2>>> sub_sat(const uint8<N,E1>& a,
                                             const uint8<N,E2>& b)
{
    return { { a, b } };
}

SIMDPP_SCALAR_ARG_IMPL_EXPR(sub_sat, expr_isub_sat, uint8, uint8)

/** Subtracts and saturaters unsigned 16-bit integer values.

    @code
    r0 = saturated(a0 - b0)
    ...
    rN = saturated(aN - bN)
    @endcode

    @par 256-bit version:
    @icost{SSE2-AVX, NEON, ALTIVEC, 2}
*/
template<unsigned N, class E1, class E2> SIMDPP_INL
uint16<N, expr_isub_sat<uint16<N,E1>,
                        uint16<N,E2>>> sub_sat(const uint16<N,E1>& a,
                                               const uint16<N,E2>& b)
{
    return { { a, b } };
}

SIMDPP_SCALAR_ARG_IMPL_EXPR(sub_sat, expr_isub_sat, uint16, uint16)

} // namespace SIMDPP_ARCH_NAMESPACE
} // namespace simdpp

#endif
