# Supplementary material
Source: ML conference proceedings conference paper supplement (https://proceedings.neurips.cc/paper_files/paper/2022/hash/5afaa8b4dd18eb1eed055d2d821b58ae-Abstract.html)
Supplement: Supplementary file 1 [file 5afaa8b4dd18eb1eed055d2d821b58ae-Supplemental-Conference.zip › 6769_exploring_the_whole_rashomon_s-Supplementary Material/6769_code_repo/include/simdpp/core/make_float.h]

/*  Copyright (C) 2014  Povilas Kanapickas <povilas@radix.lt>

    Distributed under the Boost Software License, Version 1.0.
        (See accompanying file LICENSE_1_0.txt or copy at
            http://www.boost.org/LICENSE_1_0.txt)
*/

#ifndef LIBSIMDPP_SIMDPP_CORE_MAKE_FLOAT_H
#define LIBSIMDPP_SIMDPP_CORE_MAKE_FLOAT_H

#ifndef LIBSIMDPP_SIMD_H
    #error "This file must be included through simd.h"
#endif

#include <simdpp/types.h>
#include <simdpp/detail/insn/make_const.h>

namespace simdpp {
namespace SIMDPP_ARCH_NAMESPACE {

/** Creates a vector from floating-point values known at compile-time.
    The result of this function may be assigned or converted to a vector of any
    type: standard conversions are used to convert the arguments. All
    conversions and other overhead is performed at compile-time thus even if the
    minimal optimization level is selected, the function results in a simple
    load from memory.

    The function is not guaranteed to have adequate performance if the
    arguments are not known at compile-time.

    If the vector has fewer elements than the number of the parameters this
    function accepts then the extra values are discarded.

    @par 1 parameter version
    @code
        | 0  1  2  3  ... n  |
    r = [ v0 v0 v0 v0 ... v0 ]
    @endcode

    @par 2 parameters version
    @code
        | 0  1  2  3  ... n  |
    r = [ v0 v1 v0 v1 ... v1 ]
    @endcode

    @par 4 parameters version
    @code
        | 0  1  2  3  ... n  |
    r = [ v0 v1 v2 v3 ... v3 ]
    @endcode

    @par 8 parameters version
    @code
        | 0  1  ..  7  8  ... n  |
    r = [ v0 v1 .. v7 v0  ... v7 ]
    @endcode
*/
SIMDPP_INL expr_vec_make_const<double,1> make_float(double v0)
{
    expr_vec_make_const<double,1> a;
    a.a[0] = v0;
    return a;
}

SIMDPP_INL expr_vec_make_const<double,2> make_float(double v0, double v1)
{
    expr_vec_make_const<double,2> a;
    a.a[0] = v0;  a.a[1] = v1;
    return a;
}

SIMDPP_INL expr_vec_make_const<double,4>
    make_float(double v0, double v1, double v2, double v3)
{
    expr_vec_make_const<double,4> a;
    a.a[0] = v0;  a.a[1] = v1;  a.a[2] = v2;  a.a[3] = v3;
    return a;
}

SIMDPP_INL expr_vec_make_const<double,8>
    make_float(double v0, double v1, double v2, double v3,
               double v4, double v5, double v6, double v7)
{
    expr_vec_make_const<double,8> a;
    a.a[0] = v0;  a.a[1] = v1;  a.a[2] = v2;  a.a[3] = v3;
    a.a[4] = v4;  a.a[5] = v5;  a.a[6] = v6;  a.a[7] = v7;
    return a;
}

SIMDPP_INL expr_vec_make_const<double,16>
    make_float(double v0,  double v1,  double v2,  double v3,
               double v4,  double v5,  double v6,  double v7,
               double v8,  double v9,  double v10, double v11,
               double v12, double v13, double v14, double v15)
{
    expr_vec_make_const<double,16> a;
    a.a[0] = v0;    a.a[1] = v1;    a.a[2] = v2;    a.a[3] = v3;
    a.a[4] = v4;    a.a[5] = v5;    a.a[6] = v6;    a.a[7] = v7;
    a.a[8] = v8;    a.a[9] = v9;    a.a[10] = v10;  a.a[11] = v11;
    a.a[12] = v12;  a.a[13] = v13;  a.a[14] = v14;  a.a[15] = v15;
    return a;
}

template<class V> SIMDPP_INL
V make_float(double v0)
{
    static_assert(is_vector<V>::value && !is_mask<V>::value,
                  "V must be a non-mask vector");
    expr_vec_make_const<double,1> a;
    a.a[0] = v0;
    return detail::insn::i_make_const_any<V>(a);
}

template<class V> SIMDPP_INL
V make_float(double v0, double v1)
{
    static_assert(is_vector<V>::value && !is_mask<V>::value,
                  "V must be a non-mask vector");
    expr_vec_make_const<double,2> a;
    a.a[0] = v0;  a.a[1] = v1;
    return detail::insn::i_make_const_any<V>(a);
}

template<class V> SIMDPP_INL
V make_float(double v0, double v1, double v2, double v3)
{
    static_assert(is_vector<V>::value && !is_mask<V>::value,
                  "V must be a non-mask vector");
    expr_vec_make_const<double,4> a;
    a.a[0] = v0;  a.a[1] = v1;  a.a[2] = v2;  a.a[3] = v3;
    return detail::insn::i_make_const_any<V>(a);
}

template<class V> SIMDPP_INL
V make_float(double v0, double v1, double v2, double v3,
             double v4, double v5, double v6, double v7)
{
    static_assert(is_vector<V>::value && !is_mask<V>::value,
                  "V must be a non-mask vector");
    expr_vec_make_const<double,8> a;
    a.a[0] = v0;  a.a[1] = v1;  a.a[2] = v2;  a.a[3] = v3;
    a.a[4] = v4;  a.a[5] = v5;  a.a[6] = v6;  a.a[7] = v7;
    return detail::insn::i_make_const_any<V>(a);
}

template<class V> SIMDPP_INL
V make_float(double v0,  double v1,  double v2,  double v3,
             double v4,  double v5,  double v6,  double v7,
             double v8,  double v9,  double v10, double v11,
             double v12, double v13, double v14, double v15)
{
    static_assert(is_vector<V>::value && !is_mask<V>::value,
                  "V must be a non-mask vector");
    expr_vec_make_const<double,16> a;
    a.a[0] = v0;    a.a[1] = v1;    a.a[2] = v2;    a.a[3] = v3;
    a.a[4] = v4;    a.a[5] = v5;    a.a[6] = v6;    a.a[7] = v7;
    a.a[8] = v8;    a.a[9] = v9;    a.a[10] = v10;  a.a[11] = v11;
    a.a[12] = v12;  a.a[13] = v13;  a.a[14] = v14;  a.a[15] = v15;
    return detail::insn::i_make_const_any<V>(a);
}

} // namespace SIMDPP_ARCH_NAMESPACE
} // namespace simdpp

#endif
