# Supplementary material
Source: ML conference proceedings conference paper supplement (https://proceedings.neurips.cc/paper_files/paper/2022/hash/5afaa8b4dd18eb1eed055d2d821b58ae-Abstract.html)
Supplement: Supplementary file 1 [file 5afaa8b4dd18eb1eed055d2d821b58ae-Supplemental-Conference.zip › 6769_exploring_the_whole_rashomon_s-Supplementary Material/6769_code_repo/include/simdpp/core/move_r.h]

/*  Copyright (C) 2013-2014  Povilas Kanapickas <povilas@radix.lt>

    Distributed under the Boost Software License, Version 1.0.
        (See accompanying file LICENSE_1_0.txt or copy at
            http://www.boost.org/LICENSE_1_0.txt)
*/

#ifndef LIBSIMDPP_SIMDPP_CORE_MOVE_R_H
#define LIBSIMDPP_SIMDPP_CORE_MOVE_R_H

#ifndef LIBSIMDPP_SIMD_H
    #error "This file must be included through simd.h"
#endif

#include <simdpp/types.h>
#include <simdpp/detail/insn/move_r.h>

namespace simdpp {
namespace SIMDPP_ARCH_NAMESPACE {

/** Moves the 8-bit elements in a vector to the right by @a shift positions.

    @code
    shift:  pos:| 0   1    .  14  15  |
     0      r = [ a0  a1   .  a14 a15 ]
     1      r = [  0  a0   .  a13 a14 ]
     2      r = [  0   0   .  a12 a13 ]
      ...    ..   .. ..   ...  ..  .. ..
     14     r = [  0   0   .  a0  a1  ]
     15     r = [  0   0   .   0  a0  ]
     16     r = [  0   0   .   0   0  ]
    @endcode

    @par 256-bit version:
    The lower and higher 128-bit halves are processed as if 128-bit instruction
    was applied to each of them separately.

    @icost{SSE2-AVX, NEON, ALTIVEC, 2}
*/
template<unsigned shift, unsigned N, class V> SIMDPP_INL
typename detail::get_expr_nomask<V>::empty
        move16_r(const any_vec8<N,V>& a)
{
    static_assert(shift <= 16, "Shift out of bounds");

    typename detail::get_expr_nomask_nosign<V>::type ra;
    ra = a.wrapped().eval();
    return detail::insn::i_move16_r_wrapper<shift>::run(ra);
}

/** Moves the 16-bit elements in a vector to the right by @a shift positions.

    @code
    shift:  pos:| 0  1   . 6  7  |
     0      r = [ a0 a1  . a6 a7 ]
     1      r = [  0 a0  . a5 a6 ]
     2      r = [  0  0  . a4 a5 ]
      ...    ..   .. .. ... .. ..
     6      r = [  0  0  . a0 a1 ]
     7      r = [  0  0  .  0 a0 ]
     8      r = [  0  0  .  0  0 ]
    @endcode

    @par 256-bit version:
    The lower and higher 128-bit halves are processed as if 128-bit instruction
    was applied to each of them separately.

    @icost{SSE2-AVX, NEON, ALTIVEC, 2}
*/
template<unsigned shift, unsigned N, class V> SIMDPP_INL
typename detail::get_expr_nomask<V>::empty
        move8_r(const any_vec16<N,V>& a)
{
    static_assert(shift <= 8, "Shift out of bounds");

    typename detail::get_expr_nomask_nosign<V>::type ra;
    ra = a.wrapped().eval();
    return detail::insn::i_move8_r_wrapper<shift>::run(ra);
}

/** Moves the 32-bit elements in a vector to the right by @a shift positions.

    @code
    shift:  pos:| 0  1  2  3  |
     0      r = [ a0 a1 a2 a3 ]
     1      r = [  0 a0 a1 a2 ]
     2      r = [  0  0 a0 a1 ]
     3      r = [  0  0  0 a0 ]
     4      r = [  0  0  0  0 ]
    @endcode

    @par 256-bit version:
    The lower and higher 128-bit halves are processed as if 128-bit instruction
    was applied to each of them separately.

    @icost{SSE2-AVX, NEON, ALTIVEC, 2}
*/
template<unsigned shift, unsigned N, class V> SIMDPP_INL
typename detail::get_expr_nomask<V>::empty
        move4_r(const any_vec32<N,V>& a)
{
    static_assert(shift <= 4, "Shift out of bounds");

    typename detail::get_expr_nomask_nosign<V>::type ra;
    ra = a.wrapped().eval();
    return detail::insn::i_move4_r_wrapper<shift>::run(ra);
}


/** Moves the 64-bit elements in a vector to the right by @a shift positions.

    @code
    shift:  pos:| 0  1  |
     0      r = [ a0 a1 ]
     1      r = [  0 a0 ]
     2      r = [  0  0 ]
    @endcode

    @par 256-bit version:
    The lower and higher 128-bit halves are processed as if 128-bit instruction
    was applied to each of them separately.

    @icost{SSE2-AVX, NEON, ALTIVEC, 2}
*/
template<unsigned shift, unsigned N, class V> SIMDPP_INL
typename detail::get_expr_nomask<V>::empty
        move2_r(const any_vec64<N,V>& a)
{
    static_assert(shift <= 2, "Shift out of bounds");

    typename detail::get_expr_nomask_nosign<V>::type ra;
    ra = a.wrapped().eval();
    return detail::insn::i_move2_r_wrapper<shift>::run(ra);
}


} // namespace SIMDPP_ARCH_NAMESPACE
} // namespace simdpp

#endif
