# Supplementary material
Source: ML conference proceedings conference paper supplement (https://proceedings.neurips.cc/paper_files/paper/2022/hash/5afaa8b4dd18eb1eed055d2d821b58ae-Abstract.html)
Supplement: Supplementary file 1 [file 5afaa8b4dd18eb1eed055d2d821b58ae-Supplemental-Conference.zip › 6769_exploring_the_whole_rashomon_s-Supplementary Material/6769_code_repo/include/simdpp/core/permute_bytes16.h]

/*  Copyright (C) 2013-2017  Povilas Kanapickas <povilas@radix.lt>

    Distributed under the Boost Software License, Version 1.0.
        (See accompanying file LICENSE_1_0.txt or copy at
            http://www.boost.org/LICENSE_1_0.txt)
*/

#ifndef LIBSIMDPP_SIMDPP_CORE_PERMUTE_BYTES16_H
#define LIBSIMDPP_SIMDPP_CORE_PERMUTE_BYTES16_H

#ifndef LIBSIMDPP_SIMD_H
    #error "This file must be included through simd.h"
#endif

#include <simdpp/types.h>
#include <simdpp/detail/get_expr.h>
#include <simdpp/detail/insn/permute_bytes16.h>

namespace simdpp {
namespace SIMDPP_ARCH_NAMESPACE {

/** Selects bytes from a vector according to a mask. Each byte within the
    mask defines which element to select:
     * Bits 7-4 must be zero or the behavior is undefined
     * Bits 3-0 define the element within the given vector.
*/
template<unsigned N, class V1, class E2> SIMDPP_INL
typename detail::get_expr_nomask<V1>::empty
    permute_bytes16(const any_vec8<N,V1>& a, const uint8<N,E2>& mask)
{
    typename detail::get_expr_nomask<V1>::type ra = a.wrapped().eval();
    return detail::insn::i_permute_bytes16(ra, mask.eval());
}

template<unsigned N, class V1, class E2> SIMDPP_INL
typename detail::get_expr_nomask<V1>::empty
    permute_bytes16(const any_vec16<N,V1>& a, const uint16<N,E2>& mask)
{
    typename detail::get_expr_nomask<V1>::type ra = a.wrapped().eval();
    return detail::insn::i_permute_bytes16(ra, mask.eval());
}

template<unsigned N, class V1, class E2> SIMDPP_INL
typename detail::get_expr_nomask<V1>::empty
    permute_bytes16(const any_vec32<N,V1>& a, const uint32<N,E2>& mask)
{
    typename detail::get_expr_nomask<V1>::type ra = a.wrapped().eval();
    return detail::insn::i_permute_bytes16(ra, mask.eval());
}

template<unsigned N, class V1, class E2> SIMDPP_INL
typename detail::get_expr_nomask<V1>::empty
    permute_bytes16(const any_vec64<N,V1>& a, const uint64<N,E2>& mask)
{
    typename detail::get_expr_nomask<V1>::type ra = a.wrapped().eval();
    return detail::insn::i_permute_bytes16(ra, mask.eval());
}
} // namespace SIMDPP_ARCH_NAMESPACE
} // namespace simdpp

#endif
