# Supplementary material
Source: ML conference proceedings conference paper supplement (https://proceedings.neurips.cc/paper_files/paper/2022/hash/5afaa8b4dd18eb1eed055d2d821b58ae-Abstract.html)
Supplement: Supplementary file 1 [file 5afaa8b4dd18eb1eed055d2d821b58ae-Supplemental-Conference.zip › 6769_exploring_the_whole_rashomon_s-Supplementary Material/6769_code_repo/include/simdpp/core/set_splat.h]

/*  Copyright (C) 2014  Povilas Kanapickas <povilas@radix.lt>

    Distributed under the Boost Software License, Version 1.0.
        (See accompanying file LICENSE_1_0.txt or copy at
            http://www.boost.org/LICENSE_1_0.txt)
*/

#ifndef LIBSIMDPP_SIMDPP_CORE_SET_SPLAT_H
#define LIBSIMDPP_SIMDPP_CORE_SET_SPLAT_H

#ifndef LIBSIMDPP_SIMD_H
    #error "This file must be included through simd.h"
#endif

#include <simdpp/types.h>
#include <simdpp/detail/insn/set_splat.h>

namespace simdpp {
namespace SIMDPP_ARCH_NAMESPACE {

/** Loads a value from a register and broadcasts it to all elements of a vector.
    The argument value is converted to the element of the resulting vector using
    standard conversions.

    @code
    r0 = a
    ...
    rN = a
    @endcode
*/
// FIXME: return empty expression
SIMDPP_INL expr_vec_set_splat<uint32_t> splat(unsigned x) { return { x }; }
SIMDPP_INL expr_vec_set_splat<uint64_t> splat(unsigned long x) { return { x }; }
SIMDPP_INL expr_vec_set_splat<uint64_t> splat(unsigned long long x) { return { x }; }
SIMDPP_INL expr_vec_set_splat<int32_t>  splat(int x) { return { x }; }
SIMDPP_INL expr_vec_set_splat<int64_t>  splat(long x) { return { x }; }
SIMDPP_INL expr_vec_set_splat<int64_t>  splat(long long x) { return { x }; }
SIMDPP_INL expr_vec_set_splat<float>    splat(float x) { return { x }; }
SIMDPP_INL expr_vec_set_splat<double>   splat(double x) { return { x }; }

template<class V> SIMDPP_INL V splat(unsigned x) { return detail::splat_impl<V>(x); }
template<class V> SIMDPP_INL V splat(unsigned long x) { return detail::splat_impl<V>(x); }
template<class V> SIMDPP_INL V splat(unsigned long long x) { return detail::splat_impl<V>(x); }
template<class V> SIMDPP_INL V splat(int x) { return detail::splat_impl<V>(x); }
template<class V> SIMDPP_INL V splat(long x) { return detail::splat_impl<V>(x); }
template<class V> SIMDPP_INL V splat(long long x) { return detail::splat_impl<V>(x); }
template<class V> SIMDPP_INL V splat(float x) { return detail::splat_impl<V>(x); }
template<class V> SIMDPP_INL V splat(double x) { return detail::splat_impl<V>(x); }

} // namespace SIMDPP_ARCH_NAMESPACE
} // namespace simdpp

#endif
