# Supplementary material
Source: ML conference proceedings conference paper supplement (https://proceedings.neurips.cc/paper_files/paper/2022/hash/5afaa8b4dd18eb1eed055d2d821b58ae-Abstract.html)
Supplement: Supplementary file 1 [file 5afaa8b4dd18eb1eed055d2d821b58ae-Supplemental-Conference.zip › 6769_exploring_the_whole_rashomon_s-Supplementary Material/6769_code_repo/include/simdpp/core/shuffle2.h]

/*  Copyright (C) 2013-2014  Povilas Kanapickas <povilas@radix.lt>

    Distributed under the Boost Software License, Version 1.0.
        (See accompanying file LICENSE_1_0.txt or copy at
            http://www.boost.org/LICENSE_1_0.txt)
*/

#ifndef LIBSIMDPP_SIMDPP_CORE_SHUFFLE2_H
#define LIBSIMDPP_SIMDPP_CORE_SHUFFLE2_H

#ifndef LIBSIMDPP_SIMD_H
    #error "This file must be included through simd.h"
#endif

#include <simdpp/types.h>
#include <simdpp/detail/insn/shuffle4x2.h>

namespace simdpp {
namespace SIMDPP_ARCH_NAMESPACE {

/** Selects 32-bit floating-point values from two vectors. The first two values
    in each four consecutive values must come from @a a, the last two - from @a
    b. The selector values must be in range [0; 3].

    @code
    r0 = a[a0]
    r1 = a[a1]
    r2 = b[b0]
    r3 = b[b1]

    256-bit version:
    r4 = a[a0+4]
    r5 = a[a1+4]
    r6 = b[b0+4]
    r7 = b[b1+4]
    @endcode

    @par floating-point
    @par 128-bit version:
    @icost{ALTIVEC, 1-2}
    @icost{NEON, 1-4}

    @par 256-bit version:
    @icost{SSE2-SSE4.1, 2}
    @icost{NEON, 2-8}
    @icost{ALTIVEC, 2-3}

    @par integer
     @par 128-bit version:
    @icost{NEON, 1-4}
    @icost{ALTIVEC, 1-2}

    @par 256-bit version:
    @icost{SSE2-AVX, 2}
    @icost{NEON, 2-8}
    @icost{ALTIVEC, 2-3}
*/
template<unsigned sa0, unsigned sa1, unsigned sb0, unsigned sb1, unsigned N,
         class V1, class V2> SIMDPP_INL
typename detail::get_expr2_nomask<V1, V2>::empty
    shuffle2(const any_vec32<N,V1>& a, const any_vec32<N,V2>& b)
{
    static_assert(sa0 < 4 && sa1 < 4 && sb0 < 4 && sb1 < 4, "Selector out of range");
    typename detail::get_expr2_nomask<V1,V2,void>::type a0 = a.wrapped().eval(),
                                                        b0 = b.wrapped().eval();
    return detail::insn::i_shuffle4x2<sa0,sa1,sb0+4,sb1+4>(a0, b0);
}

/** Selects 32-bit values from two vectors. The first two values in each four
    consecutive values must come from @a a, the last two - from @a b. The
    selector values must be in range [0; 3].

    @code
    r0 = a[s0]
    r1 = a[s1]
    r2 = b[s0]
    r3 = b[s1]

    256-bit version:
    r4 = a[s0+4]
    r5 = a[s1+4]
    r6 = b[s0+4]
    r7 = b[s1+4]
    @endcode

    @par floating-point
    @par 128-bit version:
    @icost{ALTIVEC, 1-2}
    @icost{NEON, 2-4}

    @par 256-bit version:
    @icost{SSE2-SSE4.1, 2}
    @icost{NEON, 4-8}
    @icost{ALTIVEC, 2-3}

    @par integer
    @par 128-bit version:
    @icost{NEON, 2-4}
    @icost{ALTIVEC, 1-2}

    @par 256-bit version:
    @icost{SSE2-AVX, 2}
    @icost{NEON, 4-8}
    @icost{ALTIVEC, 2-3}
*/
template<unsigned s0, unsigned s1, unsigned N,
         class V1, class V2> SIMDPP_INL
typename detail::get_expr2_nomask<V1, V2>::empty
    shuffle2(const any_vec32<N,V1>& a, const any_vec32<N,V2>& b)
{
    static_assert(s0 < 4 && s1 < 4, "Selector out of range");
    typename detail::get_expr2_nomask<V1,V2,void>::type a0 = a.wrapped().eval(),
                                                        b0 = b.wrapped().eval();
    return detail::insn::i_shuffle4x2<s0,s1,s0+4,s1+4>(a0, b0);
}


} // namespace SIMDPP_ARCH_NAMESPACE
} // namespace simdpp

#endif
