# Supplementary material
Source: ML conference proceedings conference paper supplement (https://proceedings.neurips.cc/paper_files/paper/2022/hash/5afaa8b4dd18eb1eed055d2d821b58ae-Abstract.html)
Supplement: Supplementary file 1 [file 5afaa8b4dd18eb1eed055d2d821b58ae-Supplemental-Conference.zip › 6769_exploring_the_whole_rashomon_s-Supplementary Material/6769_code_repo/include/simdpp/core/store.h]

/*  Copyright (C) 2013-2014  Povilas Kanapickas <povilas@radix.lt>

    Distributed under the Boost Software License, Version 1.0.
        (See accompanying file LICENSE_1_0.txt or copy at
            http://www.boost.org/LICENSE_1_0.txt)
*/

#ifndef LIBSIMDPP_SIMDPP_CORE_STORE_H
#define LIBSIMDPP_SIMDPP_CORE_STORE_H

#ifndef LIBSIMDPP_SIMD_H
    #error "This file must be included through simd.h"
#endif

#include <simdpp/types.h>
#include <simdpp/detail/insn/store.h>

namespace simdpp {
namespace SIMDPP_ARCH_NAMESPACE {

/** Stores a 128-bit or 256-bit integer vector to an aligned memory location.

    @par 128-bit version:

    @code
    *(p) = a[0..127]
    @endcode
    @a p must be aligned to 16 bytes.

    @par 256-bit version:

    @code
    *(p) = a[0..255]
    @endcode
    @a p must be aligned to 32 bytes.
    @icost{SSE2-SSE4.1, NEON, ALTIVEC, 2}
    @icost{AVX (integer vectors), 2}
*/
template<class T, unsigned N, class V> SIMDPP_INL
void store(T* p, const any_vec<N,V>& a)
{
    static_assert(!is_mask<V>::value, "Masks can not be stored"); // FIXME: automatically convert
    detail::insn::i_store(reinterpret_cast<char*>(p), a.wrapped().eval());
}

} // namespace SIMDPP_ARCH_NAMESPACE
} // namespace simdpp

#endif
