# Supplementary material
Source: ML conference proceedings conference paper supplement (https://proceedings.neurips.cc/paper_files/paper/2022/hash/5afaa8b4dd18eb1eed055d2d821b58ae-Abstract.html)
Supplement: Supplementary file 1 [file 5afaa8b4dd18eb1eed055d2d821b58ae-Supplemental-Conference.zip › 6769_exploring_the_whole_rashomon_s-Supplementary Material/6769_code_repo/include/simdpp/core/store_packed4.h]

/*  Copyright (C) 2013-2014  Povilas Kanapickas <povilas@radix.lt>

    Distributed under the Boost Software License, Version 1.0.
        (See accompanying file LICENSE_1_0.txt or copy at
            http://www.boost.org/LICENSE_1_0.txt)
*/

#ifndef LIBSIMDPP_SIMDPP_CORE_STORE_PACKED4_H
#define LIBSIMDPP_SIMDPP_CORE_STORE_PACKED4_H

#ifndef LIBSIMDPP_SIMD_H
    #error "This file must be included through simd.h"
#endif

#include <simdpp/types.h>
#include <simdpp/detail/insn/store_packed4.h>

namespace simdpp {
namespace SIMDPP_ARCH_NAMESPACE {


/** Interleaves values from four vectors and stores the result into successive
    locations starting from @a p.

    @par 128-bit version:
    @code
    [ *(p),   *(p+4), *(p+8),  ... , *(p+M*4-4) ] = a
    [ *(p+1), *(p+5), *(p+9),  ... , *(p+M*4-3) ] = b
    [ *(p+2), *(p+6), *(p+10), ... , *(p+M*4-2) ] = c
    [ *(p+3), *(p+7), *(p+11), ... , *(p+M*4-1) ] = d
    @endcode

    Here M is the number of elements in the vector

    @a p must be aligned to the vector size in bytes
*/
template<class T, unsigned N, class V1, class V2, class V3, class V4> SIMDPP_INL
void store_packed4(T* p,
                   const any_vec<N,V1>& a, const any_vec<N,V2>& b,
                   const any_vec<N,V3>& c, const any_vec<N,V4>& d)
{
    static_assert(!is_mask<V1>::value && !is_mask<V2>::value &&
                  !is_mask<V3>::value && !is_mask<V4>::value,
                  "Mask types can not be stored"); // FIXME
    static_assert(V1::size_tag == V2::size_tag &&
                  V1::size_tag == V3::size_tag &&
                  V1::size_tag == V4::size_tag,
                  "Vector elements must have the same size");
    detail::insn::i_store_packed4(reinterpret_cast<char*>(p),
                                  a.wrapped().eval(), b.wrapped().eval(),
                                  c.wrapped().eval(), d.wrapped().eval());
}


} // namespace SIMDPP_ARCH_NAMESPACE
} // namespace simdpp

#endif
