# Supplementary material
Source: ML conference proceedings conference paper supplement (https://proceedings.neurips.cc/paper_files/paper/2022/hash/5afaa8b4dd18eb1eed055d2d821b58ae-Abstract.html)
Supplement: Supplementary file 1 [file 5afaa8b4dd18eb1eed055d2d821b58ae-Supplemental-Conference.zip › 6769_exploring_the_whole_rashomon_s-Supplementary Material/6769_code_repo/include/simdpp/deprecations.h]

/*  Copyright (C) 2017  Povilas Kanapickas <povilas@radix.lt>

    Distributed under the Boost Software License, Version 1.0.
        (See accompanying file LICENSE_1_0.txt or copy at
            http://www.boost.org/LICENSE_1_0.txt)
*/

#ifndef LIBSIMDPP_SIMDPP_DEPRETATIONS_H
#define LIBSIMDPP_SIMDPP_DEPRETATIONS_H

// Compatibility macro introduced in 2.1 development cycle, but never released
// Will be removed in the future
#ifdef SIMDPP_DEFINE_IMPLICIT_CONVERSION_OPERATOR_TO_NATIVE_TYPES
    #if SIMDPP_DEFINE_IMPLICIT_CONVERSION_OPERATOR_TO_NATIVE_TYPES
        #define SIMDPP_DISABLE_DEPRECATED_CONVERSION_OPERATOR_TO_NATIVE_TYPES 0
    #else
        #define SIMDPP_DISABLE_DEPRECATED_CONVERSION_OPERATOR_TO_NATIVE_TYPES 1
    #endif
#endif

// Disables all APIs deprecated in 2.1 and older releases
#ifndef SIMDPP_DISABLE_DEPRECATED_IN_2_1_AND_OLDER
#define SIMDPP_DISABLE_DEPRECATED_IN_2_1_AND_OLDER 0
#endif

#if SIMDPP_DISABLE_DEPRECATED_IN_2_1_AND_OLDER
    #ifndef SIMDPP_DISABLE_DEPRECATED_CONVERSION_OPERATOR_TO_NATIVE_TYPES
        #define SIMDPP_DISABLE_DEPRECATED_CONVERSION_OPERATOR_TO_NATIVE_TYPES 1
    #endif
#endif

/*  Clang supports a native vector extension that defines operators between
    vector types. SSE types such as __m128 and __m128i are implemented on top
    of this extension, which causes code like this being possible:

__m128i a, b; a = a + b;

    Previously, all libsimdpp types had an implicit conversion operator to
    native vector type. For example, both uint8<16> and uint16<8> could be
    implicitly converted to __m128i. This leads to code like this being
    accepted on clang.

uint8<16> a;
uint16<8> b;
a = a + b;

    Here, both a and b are implicitly converted to __m128i values and they are
    added using an operator provided by the clang vector extension.
    Unexpectedly, the result is paddq instruction (64-bit integer addition).

    Because of this, the implicit native vector type conversion operators are
    deprecated and a native() method is provided as a replacement in libsimdpp
    vector types. This change only affects code that interacts with native
    intrinsics. Altivec/VSX and MSA are affected only slightly, because
    intrinsics of those instruction sets never accepted implicit conversions
    from libsimdpp types.
*/
#ifndef SIMDPP_DISABLE_DEPRECATED_CONVERSION_OPERATOR_TO_NATIVE_TYPES
    #define SIMDPP_DISABLE_DEPRECATED_CONVERSION_OPERATOR_TO_NATIVE_TYPES 0
#endif
#if !SIMDPP_DISABLE_DEPRECATED_CONVERSION_OPERATOR_TO_NATIVE_TYPES
    #define SIMDPP_IMPLICIT_CONVERSION_DEPRECATION_MSG                          \
        SIMDPP_DEPRECATED(                                                      \
            "Implicit conversion operators may lead to wrong code being "       \
            "accepted without a compile error on Clang. Use the native() "      \
            "method as a replacement.")
#endif

#endif
