# Supplementary material
Source: ML conference proceedings conference paper supplement (https://proceedings.neurips.cc/paper_files/paper/2022/hash/5afaa8b4dd18eb1eed055d2d821b58ae-Abstract.html)
Supplement: Supplementary file 1 [file 5afaa8b4dd18eb1eed055d2d821b58ae-Supplemental-Conference.zip › 6769_exploring_the_whole_rashomon_s-Supplementary Material/6769_code_repo/include/simdpp/types/int16x8.h]

/*  Copyright (C) 2011-2014  Povilas Kanapickas <povilas@radix.lt>

    Distributed under the Boost Software License, Version 1.0.
        (See accompanying file LICENSE_1_0.txt or copy at
            http://www.boost.org/LICENSE_1_0.txt)
*/

#ifndef LIBSIMDPP_SIMDPP_TYPES_INT16X8_H
#define LIBSIMDPP_SIMDPP_TYPES_INT16X8_H

#ifndef LIBSIMDPP_SIMD_H
    #error "This file must be included through simd.h"
#endif

#include <simdpp/setup_arch.h>
#include <simdpp/types/fwd.h>
#include <simdpp/types/any.h>
#include <simdpp/core/cast.h>
#include <simdpp/detail/construct_eval.h>
#include <simdpp/detail/array.h>
#include <simdpp/detail/null/mask.h>
#include <cstdint>

namespace simdpp {
namespace SIMDPP_ARCH_NAMESPACE {

/** Class representing 8x 16-bit signed integer vector
*/
template<>
class int16<8, void> : public any_int16<8, int16<8,void>> {
public:
    static const unsigned type_tag = SIMDPP_TAG_INT;
    using element_type = int16_t;
    using base_vector_type = int16<8>;
    using expr_type = void;

#if SIMDPP_USE_SSE2
    using native_type = __m128i;
#elif SIMDPP_USE_NEON
    using native_type = int16x8_t;
#elif SIMDPP_USE_ALTIVEC
    using native_type = __vector int16_t;
#elif SIMDPP_USE_MSA
    using native_type = v8i16;
#else
    using native_type = detail::vararray<int16_t, 8>;
#endif

    SIMDPP_INL int16<8>() = default;
    SIMDPP_INL int16<8>(const int16<8> &) = default;
    SIMDPP_INL int16<8> &operator=(const int16<8> &) = default;

    template<class E> SIMDPP_INL int16<8>(const int16<8,E>& d) { *this = d.eval(); }
    template<class E> SIMDPP_INL int16<8>(const uint16<8,E>& d) { *this = d.eval(); }
    template<class V> SIMDPP_INL explicit int16<8>(const any_vec<16,V>& d)
    {
        *this = bit_cast<int16<8>>(d.wrapped().eval());
    }
    template<class V> SIMDPP_INL int16<8>& operator=(const any_vec<16,V>& d)
    {
        *this = bit_cast<int16<8>>(d.wrapped().eval()); return *this;
    }

    /// Construct from the underlying vector type
    SIMDPP_INL int16<8>(const native_type& d) : d_(d) {}
    SIMDPP_INL int16<8>& operator=(const native_type& d) { d_ = d; return *this; }

    /// Convert to the underlying vector type
#if !SIMDPP_DISABLE_DEPRECATED_CONVERSION_OPERATOR_TO_NATIVE_TYPES
    SIMDPP_INL operator native_type() const SIMDPP_IMPLICIT_CONVERSION_DEPRECATION_MSG
    { return d_; }
#endif
    SIMDPP_INL native_type native() const { return d_; }

    template<class E> SIMDPP_INL int16<8>(const expr_vec_construct<E>& e)
    {
        detail::construct_eval_wrapper(*this, e.expr());
    }
    template<class E> SIMDPP_INL int16<8>& operator=(const expr_vec_construct<E>& e)
    {
        detail::construct_eval_wrapper(*this, e.expr()); return *this;
    }

    /// Access base vectors
    SIMDPP_INL const int16<8>& vec(unsigned) const { return *this; }
    SIMDPP_INL int16<8>& vec(unsigned)       { return *this; }

    SIMDPP_INL int16<8> eval() const { return *this; }

#if SIMDPP_USE_NULL
    /// For internal use only
    SIMDPP_INL const int16_t& el(unsigned i) const { return d_[i]; }
    SIMDPP_INL int16_t& el(unsigned i) { return d_[i]; }
#endif

private:
    native_type d_;
};

/** Class representing 8x 16-bit unsigned integer vector
*/
template<>
class uint16<8, void> : public any_int16<8, uint16<8,void>> {
public:
    static const unsigned type_tag = SIMDPP_TAG_UINT;
    using element_type = uint16_t;
    using base_vector_type = uint16<8,void>;
    using expr_type = void;

#if SIMDPP_USE_SSE2
    using native_type = __m128i;
#elif SIMDPP_USE_NEON
    using native_type = uint16x8_t;
#elif SIMDPP_USE_ALTIVEC
    using native_type = __vector uint16_t;
#elif SIMDPP_USE_MSA
    using native_type = v8u16;
#else
    using native_type = detail::vararray<uint16_t, 8>;
#endif

    SIMDPP_INL uint16<8>() = default;
    SIMDPP_INL uint16<8>(const uint16<8> &) = default;
    SIMDPP_INL uint16<8> &operator=(const uint16<8> &) = default;

    template<class E> SIMDPP_INL uint16<8>(const uint16<8,E>& d) { *this = d.eval(); }
    template<class E> SIMDPP_INL uint16<8>(const int16<8,E>& d) { *this = d.eval(); }
    template<class V> SIMDPP_INL explicit uint16<8>(const any_vec<16,V>& d)
    {
        *this = bit_cast<uint16<8>>(d.wrapped().eval());
    }
    template<class V> SIMDPP_INL uint16<8>& operator=(const any_vec<16,V>& d)
    {
        *this = bit_cast<uint16<8>>(d.wrapped().eval()); return *this;
    }

    /// Construct from the underlying vector type
    SIMDPP_INL uint16<8>(const native_type& d) : d_(d) {}
    SIMDPP_INL uint16<8>& operator=(const native_type& d) { d_ = d; return *this; }

    /// Convert to the underlying vector type
#if !SIMDPP_DISABLE_DEPRECATED_CONVERSION_OPERATOR_TO_NATIVE_TYPES
    SIMDPP_INL operator native_type() const SIMDPP_IMPLICIT_CONVERSION_DEPRECATION_MSG
    { return d_; }
#endif
    SIMDPP_INL native_type native() const { return d_; }

    template<class E> SIMDPP_INL uint16<8>(const expr_vec_construct<E>& e)
    {
        detail::construct_eval_wrapper(*this, e.expr());
    }
    template<class E> SIMDPP_INL uint16<8>& operator=(const expr_vec_construct<E>& e)
    {
        detail::construct_eval_wrapper(*this, e.expr()); return *this;
    }

    /// Access base vectors
    SIMDPP_INL const uint16<8>& vec(unsigned) const { return *this; }
    SIMDPP_INL uint16<8>& vec(unsigned)       { return *this; }

    SIMDPP_INL uint16<8> eval() const { return *this; }

#if SIMDPP_USE_NULL
    /// For uinternal use only
    SIMDPP_INL const uint16_t& el(unsigned i) const { return d_[i]; }
    SIMDPP_INL uint16_t& el(unsigned i) { return d_[i]; }
#endif

private:
    native_type d_;
};

/// Class representing possibly optimized mask data for 8x 16-bit integer
/// vector
template<>
class mask_int16<8, void> : public any_int16<8, mask_int16<8,void>> {
public:
    static const unsigned type_tag = SIMDPP_TAG_MASK_INT;
    using base_vector_type = mask_int16<8, void>;
    using expr_type = void;

#if SIMDPP_USE_AVX512VL
    using native_type = __mmask8;
#elif SIMDPP_USE_SSE2
    using native_type = __m128i;
#elif SIMDPP_USE_NEON
    using native_type = uint16x8_t;
#elif SIMDPP_USE_ALTIVEC
    using native_type = __vector uint16_t;
#elif SIMDPP_USE_MSA
    using native_type = v8u16;
#else
    using native_type = detail::vararray<uint8_t, 8>;
#endif

    SIMDPP_INL mask_int16<8>() = default;
    SIMDPP_INL mask_int16<8>(const mask_int16<8> &) = default;
    SIMDPP_INL mask_int16<8> &operator=(const mask_int16<8> &) = default;

    SIMDPP_INL mask_int16<8>(const native_type& d) : d_(d) {}

#if SIMDPP_USE_ALTIVEC
    SIMDPP_INL mask_int16<8>(const __vector __bool short& d) : d_((__vector uint16_t)d) {}
#endif

#if (SIMDPP_USE_SSE2 && !SIMDPP_USE_AVX512VL) || SIMDPP_USE_NEON || SIMDPP_USE_ALTIVEC
    SIMDPP_INL mask_int16<8>(const uint16<8>& d) : d_(d.native()) {}
#endif

    /// Convert to the underlying vector type
#if !SIMDPP_DISABLE_DEPRECATED_CONVERSION_OPERATOR_TO_NATIVE_TYPES
    SIMDPP_INL operator native_type() const SIMDPP_IMPLICIT_CONVERSION_DEPRECATION_MSG
    { return d_; }
#endif
    SIMDPP_INL native_type native() const { return d_; }

    /// Access the underlying type
    SIMDPP_INL uint16<8> unmask() const
    {
#if SIMDPP_USE_NULL
        return detail::null::unmask_mask<uint16<8>>(*this);
#elif SIMDPP_USE_AVX512VL
        return _mm_movm_epi16(d_);
#else
        return uint16<8>(d_);
#endif
    }

#if SIMDPP_USE_NULL
    SIMDPP_INL uint8_t& el(unsigned id) { return d_[id]; }
    SIMDPP_INL const uint8_t& el(unsigned id) const { return d_[id]; }
#endif

    SIMDPP_INL const mask_int16<8>& vec(unsigned) const { return *this; }
    SIMDPP_INL mask_int16<8>& vec(unsigned)       { return *this; }

    SIMDPP_INL mask_int16<8> eval() const { return *this; }

private:
    native_type d_;
};

} // namespace SIMDPP_ARCH_NAMESPACE
} // namespace simdpp

#endif
