# Supplementary material
Source: ML conference proceedings conference paper supplement (https://proceedings.neurips.cc/paper_files/paper/2022/hash/5afaa8b4dd18eb1eed055d2d821b58ae-Abstract.html)
Supplement: Supplementary file 1 [file 5afaa8b4dd18eb1eed055d2d821b58ae-Supplemental-Conference.zip › 6769_exploring_the_whole_rashomon_s-Supplementary Material/6769_code_repo/include/simdpp/types/README]

Why there's so much duplication in type definitions?
====================================================

It's not possible to implement the specializations of core templates (int8,
uint16, mask_int32) as templates themselves in C++98. It's only possible in C++11.
Thus we're simply duplicating stuff until the library can drop the C++98
support.
