# Supplementary material
Source: ML conference proceedings conference paper supplement (https://proceedings.neurips.cc/paper_files/paper/2022/hash/5afaa8b4dd18eb1eed055d2d821b58ae-Abstract.html)
Supplement: Supplementary file 1 [file 5afaa8b4dd18eb1eed055d2d821b58ae-Supplemental-Conference.zip › 6769_exploring_the_whole_rashomon_s-Supplementary Material/6769_code_repo/include/simdpp/types/tag.h]

/*  Copyright (C) 2013  Povilas Kanapickas <povilas@radix.lt>

    Distributed under the Boost Software License, Version 1.0.
        (See accompanying file LICENSE_1_0.txt or copy at
            http://www.boost.org/LICENSE_1_0.txt)
*/

#ifndef LIBSIMDPP_SIMDPP_TYPES_TAG_H
#define LIBSIMDPP_SIMDPP_TYPES_TAG_H

#ifndef LIBSIMDPP_SIMD_H
    #error "This file must be included through simd.h"
#endif

/*  The values of the tags are such that it is easy to retrieve the result type
    of an operation that involves two different types. That is, if the
    arguments have types with type tags A and B then the type tag of the result
    type will be max(A, B). Similarly, if the arguments have types with size
    tags P and Q then the size tag of the result type will be max(P, Q).

    The only exception is operation on masks with masks with different size
    tags. In that case the type tag of the result type is always TAG_UINT.

    The following list illustrates the conversion rules. The first two items
    are the argument types and the third item is the result type.

    [ Same element sizes ]

           intXX |        intXX ->        intXX
           intXX |       uintXX ->       uintXX
          uintXX |       uintXX ->       uintXX
         floatXX |        intXX ->      floatXX
         floatXX |       uintXX ->      floatXX
         floatXX |      floatXX ->      floatXX
      mask_intXX |        intXX ->       uintXX
      mask_intXX |       uintXX ->       uintXX
      mask_intXX |   mask_intXX ->   mask_intXX
      mask_intXX |      floatXX ->      floatXX
      mask_intXX | mask_floatXX -> mask_floatXX
    mask_floatXX |      floatXX ->      floatXX
    mask_floatXX | mask_floatXX -> mask_floatXX

    [ Different element sizes ]

           intXX |        intYY ->        int{ max(XX, YY) }
           intXX |       uintYY ->       uint{ max(XX, YY) }
          uintXX |       uintYY ->       uint{ max(XX, YY) }
         floatXX |        intYY ->      float{ max(XX, YY) }
         floatXX |       uintYY ->      float{ max(XX, YY) }
         floatXX |      floatYY ->      float{ max(XX, YY) }
      mask_intXX |        intYY ->       uint{ max(XX, YY) }
      mask_intXX |       uintYY ->       uint{ max(XX, YY) }
      mask_intXX |   mask_intYY ->       uint{ max(XX, YY) }
      mask_intXX |      floatYY ->      float{ max(XX, YY) }
      mask_intXX | mask_floatYY ->       uint{ max(XX, YY) }
    mask_floatXX |      floatYY ->      float{ max(XX, YY) }
    mask_floatXX | mask_floatYY ->       uint{ max(XX, YY) }

    See also simdpp/detail/get_expr.h

    If particular operation does not support masks, the masks are expanded
    internally. If both arguments are masks, then the result type is the
    underlying type of the mask type which would be retrieved using the usual
    rules (see get_expr2_nomask).

    Several examples:

    mask_int32 + mask_int32 -> uint32
    int32 + mask_int32 -> int32
    uint32 + mask_int32 -> uint32
*/
#define SIMDPP_TAG_MASK_INT     1
#define SIMDPP_TAG_MASK_FLOAT   2
#define SIMDPP_TAG_INT          3
#define SIMDPP_TAG_UINT         4
#define SIMDPP_TAG_FLOAT        5
#define SIMDPP_TAG_SIZE8        10
#define SIMDPP_TAG_SIZE16       20
#define SIMDPP_TAG_SIZE32       30
#define SIMDPP_TAG_SIZE64       40

#endif
