# Supplementary material
Source: ML conference proceedings conference paper supplement (https://proceedings.neurips.cc/paper_files/paper/2022/hash/5afaa8b4dd18eb1eed055d2d821b58ae-Abstract.html)
Supplement: Supplementary file 1 [file 5afaa8b4dd18eb1eed055d2d821b58ae-Supplemental-Conference.zip › 6769_exploring_the_whole_rashomon_s-Supplementary Material/6769_code_repo/test/fixtures/binary_sepal.csv]

sepal_length	sepal_width	class
5.1	3.5	1
4.9	3.0	1
4.7	3.2	1
4.6	3.1	1
5.0	3.6	1
5.4	3.9	1
4.6	3.4	1
5.0	3.4	1
4.4	2.9	1
4.9	3.1	1
5.4	3.7	1
4.8	3.4	1
4.8	3.0	1
4.3	3.0	1
5.8	4.0	1
5.7	4.4	1
5.4	3.9	1
5.1	3.5	1
5.7	3.8	1
5.1	3.8	1
5.4	3.4	1
5.1	3.7	1
4.6	3.6	1
5.1	3.3	1
4.8	3.4	1
5.0	3.0	1
5.0	3.4	1
5.2	3.5	1
5.2	3.4	1
4.7	3.2	1
4.8	3.1	1
5.4	3.4	1
5.2	4.1	1
5.5	4.2	1
4.9	3.1	1
5.0	3.2	1
5.5	3.5	1
4.9	3.1	1
4.4	3.0	1
5.1	3.4	1
5.0	3.5	1
4.5	2.3	1
4.4	3.2	1
5.0	3.5	1
5.1	3.8	1
4.8	3.0	1
5.1	3.8	1
4.6	3.2	1
5.3	3.7	1
5.0	3.3	1
7.0	3.2	0
6.4	3.2	0
6.9	3.1	0
5.5	2.3	0
6.5	2.8	0
5.7	2.8	0
6.3	3.3	0
4.9	2.4	0
6.6	2.9	0
5.2	2.7	0
5.0	2.0	0
5.9	3.0	0
6.0	2.2	0
6.1	2.9	0
5.6	2.9	0
6.7	3.1	0
5.6	3.0	0
5.8	2.7	0
6.2	2.2	0
5.6	2.5	0
5.9	3.2	0
6.1	2.8	0
6.3	2.5	0
6.1	2.8	0
6.4	2.9	0
6.6	3.0	0
6.8	2.8	0
6.7	3.0	0
6.0	2.9	0
5.7	2.6	0
5.5	2.4	0
5.5	2.4	0
5.8	2.7	0
6.0	2.7	0
5.4	3.0	0
6.0	3.4	0
6.7	3.1	0
6.3	2.3	0
5.6	3.0	0
5.5	2.5	0
5.5	2.6	0
6.1	3.0	0
5.8	2.6	0
5.0	2.3	0
5.6	2.7	0
5.7	3.0	0
5.7	2.9	0
6.2	2.9	0
5.1	2.5	0
5.7	2.8	0
6.3	3.3	0
5.8	2.7	0
7.1	3.0	0
6.3	2.9	0
6.5	3.0	0
7.6	3.0	0
4.9	2.5	0
7.3	2.9	0
6.7	2.5	0
7.2	3.6	0
6.5	3.2	0
6.4	2.7	0
6.8	3.0	0
5.7	2.5	0
5.8	2.8	0
6.4	3.2	0
6.5	3.0	0
7.7	3.8	0
7.7	2.6	0
6.0	2.2	0
6.9	3.2	0
5.6	2.8	0
7.7	2.8	0
6.3	2.7	0
6.7	3.3	0
7.2	3.2	0
6.2	2.8	0
6.1	3.0	0
6.4	2.8	0
7.2	3.0	0
7.4	2.8	0
7.9	3.8	0
6.4	2.8	0
6.3	2.8	0
6.1	2.6	0
7.7	3.0	0
6.3	3.4	0
6.4	3.1	0
6.0	3.0	0
6.9	3.1	0
6.7	3.1	0
6.9	3.1	0
5.8	2.7	0
6.8	3.2	0
6.7	3.3	0
6.7	3.0	0
6.3	2.5	0
6.5	3.0	0
6.2	3.4	0
5.9	3.0	0
