# Supplementary material
Source: ML conference proceedings conference paper supplement (https://proceedings.neurips.cc/paper_files/paper/2022/hash/5afaa8b4dd18eb1eed055d2d821b58ae-Abstract.html)
Supplement: Supplementary file 1 [file 5afaa8b4dd18eb1eed055d2d821b58ae-Supplemental-Conference.zip › 6769_exploring_the_whole_rashomon_s-Supplementary Material/6769_code_repo/test/fixtures/binary_sepal.json]

[
  {
    "false": {
      "complexity": 0.05000000074505806,
      "loss": 0.046666666865348816,
      "name": "class",
      "prediction": 1
    },
    "feature": 0,
    "name": "sepal_length",
    "reference": 5.45,
    "relation": ">=",
    "true": {
      "complexity": 0.05000000074505806,
      "loss": 0.03333333507180214,
      "name": "class",
      "prediction": 0
    }
  }
]
