# Supplementary material
Source: ML conference proceedings conference paper supplement (https://proceedings.neurips.cc/paper_files/paper/2022/hash/5afaa8b4dd18eb1eed055d2d821b58ae-Abstract.html)
Supplement: Supplementary file 1 [file 5afaa8b4dd18eb1eed055d2d821b58ae-Supplemental-Conference.zip › 6769_exploring_the_whole_rashomon_s-Supplementary Material/6769_code_repo/test/fixtures/dataset.csv]

f1	f2	f3	f4	f5	l
1	0	0	0	0	TFF
1	0	0	0	0	TFF
0	1	0	0	0	FTF
0	1	0	0	0	FTF
0	0	1	0	0	FFT
0	0	1	0	0	FFT
0	0	0	1	0	TFF
0	0	0	1	0	TFF
0	0	0	0	1	FTF
0	0	0	0	1	FTT
