# Supplementary material
Source: ML conference proceedings conference paper supplement (https://proceedings.neurips.cc/paper_files/paper/2022/hash/5afaa8b4dd18eb1eed055d2d821b58ae-Abstract.html)
Supplement: Supplementary file 1 [file 5afaa8b4dd18eb1eed055d2d821b58ae-Supplemental-Conference.zip › 6769_exploring_the_whole_rashomon_s-Supplementary Material/6769_code_repo/test/fixtures/dataset.json]

[
  {
    "false": {
      "false": {
        "false": {
          "complexity": 0.05000000074505806,
          "loss": 0.10000000149011612,
          "name": "l",
          "prediction": "FTF"
        },
        "feature": 3,
        "name": "f4",
        "reference": 1,
        "relation": "==",
        "true": {
          "complexity": 0.05000000074505806,
          "loss": 0.0,
          "name": "l",
          "prediction": "TFF"
        }
      },
      "feature": 2,
      "name": "f3",
      "reference": 1,
      "relation": "==",
      "true": {
        "complexity": 0.05000000074505806,
        "loss": 0.0,
        "name": "l",
        "prediction": "FFT"
      }
    },
    "feature": 0,
    "name": "f1",
    "reference": 1,
    "relation": "==",
    "true": {
      "complexity": 0.05000000074505806,
      "loss": 0.0,
      "name": "l",
      "prediction": "TFF"
    }
  }
]
