# Supplementary material
Source: ML conference proceedings conference paper supplement (https://proceedings.neurips.cc/paper_files/paper/2022/hash/5afaa8b4dd18eb1eed055d2d821b58ae-Abstract.html)
Supplement: Supplementary file 1 [file 5afaa8b4dd18eb1eed055d2d821b58ae-Supplemental-Conference.zip › 6769_exploring_the_whole_rashomon_s-Supplementary Material/6769_code_repo/test/fixtures/sepal.csv]

sepal_length	sepal_width	class
5.1	3.5	Iris-setosa
4.9	3.0	Iris-setosa
4.7	3.2	Iris-setosa
4.6	3.1	Iris-setosa
5.0	3.6	Iris-setosa
5.4	3.9	Iris-setosa
4.6	3.4	Iris-setosa
5.0	3.4	Iris-setosa
4.4	2.9	Iris-setosa
4.9	3.1	Iris-setosa
5.4	3.7	Iris-setosa
4.8	3.4	Iris-setosa
4.8	3.0	Iris-setosa
4.3	3.0	Iris-setosa
5.8	4.0	Iris-setosa
5.7	4.4	Iris-setosa
5.4	3.9	Iris-setosa
5.1	3.5	Iris-setosa
5.7	3.8	Iris-setosa
5.1	3.8	Iris-setosa
5.4	3.4	Iris-setosa
5.1	3.7	Iris-setosa
4.6	3.6	Iris-setosa
5.1	3.3	Iris-setosa
4.8	3.4	Iris-setosa
5.0	3.0	Iris-setosa
5.0	3.4	Iris-setosa
5.2	3.5	Iris-setosa
5.2	3.4	Iris-setosa
4.7	3.2	Iris-setosa
4.8	3.1	Iris-setosa
5.4	3.4	Iris-setosa
5.2	4.1	Iris-setosa
5.5	4.2	Iris-setosa
4.9	3.1	Iris-setosa
5.0	3.2	Iris-setosa
5.5	3.5	Iris-setosa
4.9	3.1	Iris-setosa
4.4	3.0	Iris-setosa
5.1	3.4	Iris-setosa
5.0	3.5	Iris-setosa
4.5	2.3	Iris-setosa
4.4	3.2	Iris-setosa
5.0	3.5	Iris-setosa
5.1	3.8	Iris-setosa
4.8	3.0	Iris-setosa
5.1	3.8	Iris-setosa
4.6	3.2	Iris-setosa
5.3	3.7	Iris-setosa
5.0	3.3	Iris-setosa
7.0	3.2	Iris-versicolor
6.4	3.2	Iris-versicolor
6.9	3.1	Iris-versicolor
5.5	2.3	Iris-versicolor
6.5	2.8	Iris-versicolor
5.7	2.8	Iris-versicolor
6.3	3.3	Iris-versicolor
4.9	2.4	Iris-versicolor
6.6	2.9	Iris-versicolor
5.2	2.7	Iris-versicolor
5.0	2.0	Iris-versicolor
5.9	3.0	Iris-versicolor
6.0	2.2	Iris-versicolor
6.1	2.9	Iris-versicolor
5.6	2.9	Iris-versicolor
6.7	3.1	Iris-versicolor
5.6	3.0	Iris-versicolor
5.8	2.7	Iris-versicolor
6.2	2.2	Iris-versicolor
5.6	2.5	Iris-versicolor
5.9	3.2	Iris-versicolor
6.1	2.8	Iris-versicolor
6.3	2.5	Iris-versicolor
6.1	2.8	Iris-versicolor
6.4	2.9	Iris-versicolor
6.6	3.0	Iris-versicolor
6.8	2.8	Iris-versicolor
6.7	3.0	Iris-versicolor
6.0	2.9	Iris-versicolor
5.7	2.6	Iris-versicolor
5.5	2.4	Iris-versicolor
5.5	2.4	Iris-versicolor
5.8	2.7	Iris-versicolor
6.0	2.7	Iris-versicolor
5.4	3.0	Iris-versicolor
6.0	3.4	Iris-versicolor
6.7	3.1	Iris-versicolor
6.3	2.3	Iris-versicolor
5.6	3.0	Iris-versicolor
5.5	2.5	Iris-versicolor
5.5	2.6	Iris-versicolor
6.1	3.0	Iris-versicolor
5.8	2.6	Iris-versicolor
5.0	2.3	Iris-versicolor
5.6	2.7	Iris-versicolor
5.7	3.0	Iris-versicolor
5.7	2.9	Iris-versicolor
6.2	2.9	Iris-versicolor
5.1	2.5	Iris-versicolor
5.7	2.8	Iris-versicolor
6.3	3.3	Iris-virginica
5.8	2.7	Iris-virginica
7.1	3.0	Iris-virginica
6.3	2.9	Iris-virginica
6.5	3.0	Iris-virginica
7.6	3.0	Iris-virginica
4.9	2.5	Iris-virginica
7.3	2.9	Iris-virginica
6.7	2.5	Iris-virginica
7.2	3.6	Iris-virginica
6.5	3.2	Iris-virginica
6.4	2.7	Iris-virginica
6.8	3.0	Iris-virginica
5.7	2.5	Iris-virginica
5.8	2.8	Iris-virginica
6.4	3.2	Iris-virginica
6.5	3.0	Iris-virginica
7.7	3.8	Iris-virginica
7.7	2.6	Iris-virginica
6.0	2.2	Iris-virginica
6.9	3.2	Iris-virginica
5.6	2.8	Iris-virginica
7.7	2.8	Iris-virginica
6.3	2.7	Iris-virginica
6.7	3.3	Iris-virginica
7.2	3.2	Iris-virginica
6.2	2.8	Iris-virginica
6.1	3.0	Iris-virginica
6.4	2.8	Iris-virginica
7.2	3.0	Iris-virginica
7.4	2.8	Iris-virginica
7.9	3.8	Iris-virginica
6.4	2.8	Iris-virginica
6.3	2.8	Iris-virginica
6.1	2.6	Iris-virginica
7.7	3.0	Iris-virginica
6.3	3.4	Iris-virginica
6.4	3.1	Iris-virginica
6.0	3.0	Iris-virginica
6.9	3.1	Iris-virginica
6.7	3.1	Iris-virginica
6.9	3.1	Iris-virginica
5.8	2.7	Iris-virginica
6.8	3.2	Iris-virginica
6.7	3.3	Iris-virginica
6.7	3.0	Iris-virginica
6.3	2.5	Iris-virginica
6.5	3.0	Iris-virginica
6.2	3.4	Iris-virginica
5.9	3.0	Iris-virginica
