# Supplementary material
Source: ML conference proceedings conference paper supplement (https://proceedings.neurips.cc/paper_files/paper/2022/hash/5afaa8b4dd18eb1eed055d2d821b58ae-Abstract.html)
Supplement: Supplementary file 1 [file 5afaa8b4dd18eb1eed055d2d821b58ae-Supplemental-Conference.zip › 6769_exploring_the_whole_rashomon_s-Supplementary Material/6769_code_repo/test/fixtures/sepal.json]

[
  {
    "false": {
      "false": {
        "complexity": 0.05000000074505806,
        "loss": 0.06666658818721771,
        "name": "class",
        "prediction": "Iris-versicolor"
      },
      "feature": 1,
      "name": "sepal_width",
      "reference": 2.95,
      "relation": ">=",
      "true": {
        "complexity": 0.05000000074505806,
        "loss": 0.0733330249786377,
        "name": "class",
        "prediction": "Iris-setosa"
      }
    },
    "feature": 0,
    "name": "sepal_length",
    "reference": 6.15,
    "relation": ">=",
    "true": {
      "complexity": 0.05000000074505806,
      "loss": 0.10666656494140625,
      "name": "class",
      "prediction": "Iris-virginica"
    }
  }
]
