# Supplementary material
Source: ML conference proceedings conference paper supplement (https://proceedings.neurips.cc/paper_files/paper/2022/hash/5afaa8b4dd18eb1eed055d2d821b58ae-Abstract.html)
Supplement: Supplementary file 1 [file 5afaa8b4dd18eb1eed055d2d821b58ae-Supplemental-Conference.zip › 6769_exploring_the_whole_rashomon_s-Supplementary Material/6769_code_repo/test/fixtures/sequences.csv]

redundant	optional	bin	enum	str	int	float	path
x	null	yes	1	alpha	0	0.0	xnullyes1alpha00.0
x	notnull	no	2	beta	1	0.123456789	xnotnullno2beta10.123456789
x	nontrivial	yes	3	gamma	-2	-999999.9999999	xnullyes3gamma-2-999999.9999999
x		no	4	delta	3	192875.1024875	xno4delta3192875.1024875
x	NA	yes	1	epsilon	-4	0	xNAyes1epsilon-40
x	Null	no	2	zeta	5	918273645.564738291	xNullno2zeta5918273645.564738291
x	NaN	yes	3	eta	6	1121121121211.3	xNaNyes3eta61121121121211.3
