# Supplementary material
Source: ML conference proceedings conference paper supplement (https://proceedings.neurips.cc/paper_files/paper/2022/hash/5afaa8b4dd18eb1eed055d2d821b58ae-Abstract.html)
Supplement: Supplementary file 1 [file 5afaa8b4dd18eb1eed055d2d821b58ae-Supplemental-Conference.zip › 6769_exploring_the_whole_rashomon_s-Supplementary Material/6769_code_repo/test/fixtures/sequences.json]

[
  {
    "false": {
      "false": {
        "false": {
          "false": {
            "complexity": 0.05000000074505806,
            "loss": 0.0,
            "name": "path",
            "prediction": "xNullno2zeta5918273645.564738291"
          },
          "feature": 3,
          "name": "enum",
          "reference": 4,
          "relation": ">=",
          "true": {
            "complexity": 0.05000000074505806,
            "loss": 0.0,
            "name": "path",
            "prediction": "xno4delta3192875.1024875"
          }
        },
        "feature": 2,
        "name": "bin",
        "reference": "yes",
        "relation": "==",
        "true": {
          "false": {
            "false": {
              "complexity": 0.05000000074505806,
              "loss": 0.0,
              "name": "path",
              "prediction": "xNAyes1epsilon-40"
            },
            "feature": 4,
            "name": "str",
            "reference": "alpha",
            "relation": "==",
            "true": {
              "complexity": 0.05000000074505806,
              "loss": 0.0,
              "name": "path",
              "prediction": "xnullyes1alpha00.0"
            }
          },
          "feature": 3,
          "name": "enum",
          "reference": 2,
          "relation": ">=",
          "true": {
            "complexity": 0.05000000074505806,
            "loss": 0.0,
            "name": "path",
            "prediction": "xNaNyes3eta61121121121211.3"
          }
        }
      },
      "feature": 1,
      "name": "optional",
      "reference": "notnull",
      "relation": "==",
      "true": {
        "complexity": 0.05000000074505806,
        "loss": 0.0,
        "name": "path",
        "prediction": "xnotnullno2beta10.123456789"
      }
    },
    "feature": 1,
    "name": "optional",
    "reference": "nontrivial",
    "relation": "==",
    "true": {
      "complexity": 0.05000000074505806,
      "loss": 0.0,
      "name": "path",
      "prediction": "xnullyes3gamma-2-999999.9999999"
    }
  }
]
