# Supplementary material
Source: ML conference proceedings conference paper supplement (https://proceedings.neurips.cc/paper_files/paper/2022/hash/5afaa8b4dd18eb1eed055d2d821b58ae-Abstract.html)
Supplement: Supplementary file 1 [file 5afaa8b4dd18eb1eed055d2d821b58ae-Supplemental-Conference.zip › 6769_exploring_the_whole_rashomon_s-Supplementary Material/6769_code_repo/test/fixtures/tree.csv]

b0	b1	b2	b3	str
0	0	0	0	b0000
0	0	0	1	b0001
0	0	1	0	b0010
0	0	1	1	b0011
0	1	0	0	b0100
0	1	0	1	b0101
0	1	1	0	b0110
0	1	1	1	b0111
1	0	0	0	b1000
1	0	0	1	b1001
1	0	1	0	b1010
1	0	1	1	b1011
1	1	0	0	b1100
1	1	0	1	b1101
1	1	1	0	b1110
1	1	1	1	b1111
