# Supplementary material
Source: ML conference proceedings conference paper supplement (https://proceedings.neurips.cc/paper_files/paper/2022/hash/5afaa8b4dd18eb1eed055d2d821b58ae-Abstract.html)
Supplement: Supplementary file 1 [file 5afaa8b4dd18eb1eed055d2d821b58ae-Supplemental-Conference.zip › 6769_exploring_the_whole_rashomon_s-Supplementary Material/6769_code_repo/test/fixtures/tree.json]

[
  {
    "false": {
      "false": {
        "false": {
          "false": {
            "complexity": 0.05000000074505806,
            "loss": 0.0,
            "name": "str",
            "prediction": "b0000"
          },
          "feature": 3,
          "name": "b3",
          "reference": 1,
          "relation": "==",
          "true": {
            "complexity": 0.05000000074505806,
            "loss": 0.0,
            "name": "str",
            "prediction": "b0001"
          }
        },
        "feature": 2,
        "name": "b2",
        "reference": 1,
        "relation": "==",
        "true": {
          "false": {
            "complexity": 0.05000000074505806,
            "loss": 0.0,
            "name": "str",
            "prediction": "b0010"
          },
          "feature": 3,
          "name": "b3",
          "reference": 1,
          "relation": "==",
          "true": {
            "complexity": 0.05000000074505806,
            "loss": 0.0,
            "name": "str",
            "prediction": "b0011"
          }
        }
      },
      "feature": 1,
      "name": "b1",
      "reference": 1,
      "relation": "==",
      "true": {
        "false": {
          "false": {
            "complexity": 0.05000000074505806,
            "loss": 0.0,
            "name": "str",
            "prediction": "b0100"
          },
          "feature": 3,
          "name": "b3",
          "reference": 1,
          "relation": "==",
          "true": {
            "complexity": 0.05000000074505806,
            "loss": 0.0,
            "name": "str",
            "prediction": "b0101"
          }
        },
        "feature": 2,
        "name": "b2",
        "reference": 1,
        "relation": "==",
        "true": {
          "false": {
            "complexity": 0.05000000074505806,
            "loss": 0.0,
            "name": "str",
            "prediction": "b0110"
          },
          "feature": 3,
          "name": "b3",
          "reference": 1,
          "relation": "==",
          "true": {
            "complexity": 0.05000000074505806,
            "loss": 0.0,
            "name": "str",
            "prediction": "b0111"
          }
        }
      }
    },
    "feature": 0,
    "name": "b0",
    "reference": 1,
    "relation": "==",
    "true": {
      "false": {
        "false": {
          "false": {
            "complexity": 0.05000000074505806,
            "loss": 0.0,
            "name": "str",
            "prediction": "b1000"
          },
          "feature": 3,
          "name": "b3",
          "reference": 1,
          "relation": "==",
          "true": {
            "complexity": 0.05000000074505806,
            "loss": 0.0,
            "name": "str",
            "prediction": "b1001"
          }
        },
        "feature": 2,
        "name": "b2",
        "reference": 1,
        "relation": "==",
        "true": {
          "false": {
            "complexity": 0.05000000074505806,
            "loss": 0.0,
            "name": "str",
            "prediction": "b1010"
          },
          "feature": 3,
          "name": "b3",
          "reference": 1,
          "relation": "==",
          "true": {
            "complexity": 0.05000000074505806,
            "loss": 0.0,
            "name": "str",
            "prediction": "b1011"
          }
        }
      },
      "feature": 1,
      "name": "b1",
      "reference": 1,
      "relation": "==",
      "true": {
        "false": {
          "false": {
            "complexity": 0.05000000074505806,
            "loss": 0.0,
            "name": "str",
            "prediction": "b1100"
          },
          "feature": 3,
          "name": "b3",
          "reference": 1,
          "relation": "==",
          "true": {
            "complexity": 0.05000000074505806,
            "loss": 0.0,
            "name": "str",
            "prediction": "b1101"
          }
        },
        "feature": 2,
        "name": "b2",
        "reference": 1,
        "relation": "==",
        "true": {
          "false": {
            "complexity": 0.05000000074505806,
            "loss": 0.0,
            "name": "str",
            "prediction": "b1110"
          },
          "feature": 3,
          "name": "b3",
          "reference": 1,
          "relation": "==",
          "true": {
            "complexity": 0.05000000074505806,
            "loss": 0.0,
            "name": "str",
            "prediction": "b1111"
          }
        }
      }
    }
  }
]
